# Supplementary material
Source: MDPI journal article supplement (https://www.mdpi.com/2072-4292/12/17/2733)
Supplement: s1 [file s1]

| <b>Planet Lab image IDs</b>               |
|-------------------------------------------|
| 20170503_171120_0e26_3B_AnalyticMS_SR.tif |
| 20170511_170545_1010_3B_AnalyticMS_SR.tif |
| 20170604_170708_1029_3B_AnalyticMS_SR.tif |
| 20170613_170758_1021_3B_AnalyticMS_SR.tif |
| 20170616_170754_1013_3B_AnalyticMS_SR.tif |
| 20170616_170755_1013_3B_AnalyticMS_SR.tif |
| 20170620_170749_1041_3B_AnalyticMS_SR.tif |
| 20170620_170750_1041_3B_AnalyticMS_SR.tif |
| 20170629_171434_0e2f_3B_AnalyticMS_SR.tif |
| 20170719_171328_0e20_3B_AnalyticMS_SR.tif |
| 20170804_170932_1005_3B_AnalyticMS_SR.tif |
| 20170825_171056_0f38_3B_AnalyticMS_SR.tif |
| 20170825_171057_0f38_3B_AnalyticMS_SR.tif |
| 20180428_172127_103b_3B_AnalyticMS_SR.tif |
| 20180507_172137_1033_3B_AnalyticMS_SR.tif |
| 20180604_172209_1015_3B_AnalyticMS_SR.tif |
| 20180613_172302_1027_3B_AnalyticMS_SR.tif |
| 20180613_172303_1027_3B_AnalyticMS_SR.tif |
| 20180619_172206_0e2f_3B_AnalyticMS_SR.tif |
| 20180628_172145_1054_3B_AnalyticMS_SR.tif |
| 20180716_172329_1002_3B_AnalyticMS_SR.tif |
| 20180716_172330_1002_3B_AnalyticMS_SR.tif |
| 20180807_172430_1012_3B_AnalyticMS_SR.tif |
| 20180807_172431_1012_3B_AnalyticMS_SR.tif |
| 20180820_171410_0f33_3B_AnalyticMS_SR.tif |
| 20180820_171411_0f33_3B_AnalyticMS_SR.tif |
