# Supplementary material
Source: MDPI journal article supplement (https://www.mdpi.com/2072-4292/12/17/2733)
Supplement: s1 [file s1]

|    | EPSG26913_X      | EPSG26913_Y      | TDR_VWC_a | TDR_VWC_b |
|----|------------------|------------------|-----------|-----------|
| 1  | 331053.611123177 | 4309610.20415141 | 0         | 3.6       |
| 2  | 331066.032814243 | 4309631.26701887 | 10.1      | 9.4       |
| 3  | 331088.739216645 | 4309680.06533535 | 19.5      | 27.1      |
| 4  | 331111.256141533 | 4309694.13841341 | 13        | 15.2      |
| 5  | 331142.451464554 | 4309739.17226318 | 13.7      | 10.5      |
| 6  | 331149.722554882 | 4309766.61476539 | 31.8      | 10.9      |
| 7  | 330963.19637845  | 4309618.64222199 | 17.4      | 15.6      |
| 8  | 330973.205464189 | 4309634.21191091 | 16.6      | 49.5      |
| 9  | 330990.013634667 | 4309651.37528838 | 3.3       | 4.7       |
| 10 | 331008.661954839 | 4309690.66996303 | 9         | 14.8      |
| 11 | 331025.978252141 | 4309721.97250046 | 15.9      | 13.4      |
| 12 | 331042.220265178 | 4309749.67653828 | 17.7      | 14.5      |
| 13 | 331068.029159526 | 4309757.7494728  | 2.2       | 10.1      |
| 14 | 331058.14222751  | 4309773.55948178 | 17.4      | 11.2      |
| 15 | 331071.486495633 | 4309796.25272026 | 26.8      | 30        |
| 16 | 331083.162454032 | 4309813.93302912 | 22.1      | 11.9      |
| 17 | 331001.846717835 | 4309769.01034969 | 11.2      | 13.7      |
| 18 | 331024.59237831  | 4309801.42291586 | 14.8      | 13        |
| 19 | 331033.6906425   | 4309821.89401029 | 15.9      | 13.4      |
| 20 | 330930.672409821 | 4309720.05099794 | 16.3      | 15.2      |
| 21 | 330947.045283789 | 4309746.02681085 | 11.9      | 18.4      |
| 22 | 330962.803343054 | 4309790.22205594 | 11.9      | 18.4      |
| 23 | 330985.789295225 | 4309822.78381463 | 18.1      | 19.2      |
| 24 | 330998.947638731 | 4309840.32827264 | 19.5      | 19.9      |
| 25 | 330881.253566256 | 4309739.44763909 | 7.2       | 13.4      |
| 26 | 330900.776369953 | 4309782.15261445 | 11.9      | 16.3      |
| 27 | 330923.65267311  | 4309828.6319673  | 5.8       | 3.6       |
| 28 | 330937.542035701 | 4309849.10050165 | 9         | 11.9      |
| 29 | 330947.776302872 | 4309867.37597874 | 8         | 15.2      |
| 30 | 330970.437894467 | 4309908.31304743 | 73.4      | 73.4      |
