# Supplementary material
Source: MDPI journal article supplement (https://www.mdpi.com/2072-4292/12/17/2733)
Supplement: s1 [file s1]

time, VWC  
21-Oct-2016 18:00:00, NaN  
21-Oct-2016 19:00:00, NaN  
21-Oct-2016 20:00:00, NaN  
21-Oct-2016 21:00:00, NaN  
21-Oct-2016 22:00:00, NaN  
21-Oct-2016 23:00:00, NaN  
22-Oct-2016, NaN  
22-Oct-2016 01:00:00, NaN  
22-Oct-2016 02:00:00, NaN  
22-Oct-2016 03:00:00, NaN  
22-Oct-2016 04:00:00, NaN  
22-Oct-2016 05:00:00, NaN  
22-Oct-2016 06:00:00, NaN  
22-Oct-2016 08:00:00, NaN  
22-Oct-2016 09:00:00, NaN  
22-Oct-2016 10:00:00, NaN  
22-Oct-2016 11:00:00, NaN  
22-Oct-2016 12:00:00, NaN  
22-Oct-2016 13:00:00, NaN  
22-Oct-2016 14:00:00, NaN  
22-Oct-2016 15:00:00, NaN  
22-Oct-2016 16:00:00, NaN  
22-Oct-2016 17:00:00, NaN  
22-Oct-2016 18:00:00, NaN  
22-Oct-2016 19:00:00, NaN  
22-Oct-2016 20:00:00, NaN  
22-Oct-2016 21:00:00, NaN  
22-Oct-2016 22:00:00, NaN  
22-Oct-2016 23:00:00, NaN  
23-Oct-2016, NaN  
23-Oct-2016 01:00:00, NaN  
23-Oct-2016 02:00:00, NaN  
23-Oct-2016 03:00:00, NaN  
23-Oct-2016 04:00:00, NaN  
23-Oct-2016 05:00:00, NaN  
23-Oct-2016 06:00:00, NaN  
23-Oct-2016 07:00:00, NaN  
23-Oct-2016 08:00:00, NaN  
23-Oct-2016 09:00:00, NaN  
23-Oct-2016 10:00:00, NaN  
23-Oct-2016 11:00:00, NaN  
23-Oct-2016 12:00:00, NaN  
23-Oct-2016 13:00:00, NaN  
23-Oct-2016 14:00:00, NaN  
23-Oct-2016 15:00:00, NaN  
23-Oct-2016 16:00:00, NaN  
23-Oct-2016 17:00:00, NaN  
23-Oct-2016 18:00:00, NaN  
23-Oct-2016 19:00:00, NaN  
23-Oct-2016 20:00:00, NaN  
23-Oct-2016 21:00:00, NaN  
23-Oct-2016 22:00:00, NaN  
23-Oct-2016 23:00:00, NaN  
24-Oct-2016, NaN  
24-Oct-2016 01:00:00, NaN  
24-Oct-2016 02:00:00, NaN  
24-Oct-2016 03:00:00, NaN  
24-Oct-2016 04:00:00, NaN  
24-Oct-2016 05:00:00, NaN  
24-Oct-2016 06:00:00, NaN  
24-Oct-2016 07:00:00, NaN  
24-Oct-2016 08:00:00, NaN  
24-Oct-2016 09:00:00, NaN

24-Oct-2016 10:00:00, NaN  
24-Oct-2016 11:00:00, NaN  
24-Oct-2016 12:00:00, NaN  
24-Oct-2016 13:00:00, NaN  
24-Oct-2016 14:00:00, NaN  
24-Oct-2016 15:00:00, NaN  
24-Oct-2016 16:00:00, NaN  
24-Oct-2016 17:00:00, NaN  
24-Oct-2016 18:00:00, NaN  
24-Oct-2016 19:00:00, NaN  
24-Oct-2016 20:00:00, NaN  
24-Oct-2016 21:00:00, NaN  
24-Oct-2016 22:00:00, NaN  
24-Oct-2016 23:00:00, NaN  
25-Oct-2016, NaN  
25-Oct-2016 01:00:00, NaN  
25-Oct-2016 02:00:00, NaN  
25-Oct-2016 03:00:00, NaN  
25-Oct-2016 04:00:00, NaN  
25-Oct-2016 05:00:00, NaN  
25-Oct-2016 06:00:00, NaN  
25-Oct-2016 07:00:00, NaN  
25-Oct-2016 08:00:00, NaN  
25-Oct-2016 09:00:00, NaN  
25-Oct-2016 10:00:00, NaN  
25-Oct-2016 11:00:00, NaN  
25-Oct-2016 12:00:00, NaN  
25-Oct-2016 13:00:00, NaN  
25-Oct-2016 14:00:00, NaN  
25-Oct-2016 15:00:00, NaN  
25-Oct-2016 16:00:00, NaN  
25-Oct-2016 17:00:00, NaN  
25-Oct-2016 18:00:00, NaN  
25-Oct-2016 19:00:00, NaN  
25-Oct-2016 20:00:00, NaN  
25-Oct-2016 21:00:00, NaN  
25-Oct-2016 22:00:00, NaN  
25-Oct-2016 23:00:00, NaN  
26-Oct-2016, NaN  
26-Oct-2016 01:00:00, NaN  
26-Oct-2016 02:00:00, NaN  
26-Oct-2016 03:00:00, NaN  
26-Oct-2016 04:00:00, NaN  
26-Oct-2016 05:00:00, NaN  
26-Oct-2016 06:00:00, NaN  
26-Oct-2016 07:00:00, NaN  
26-Oct-2016 08:00:00, NaN  
26-Oct-2016 09:00:00, NaN  
26-Oct-2016 10:00:00, NaN  
26-Oct-2016 11:00:00, NaN  
26-Oct-2016 12:00:00, NaN  
26-Oct-2016 13:00:00, NaN  
26-Oct-2016 14:00:00, NaN  
26-Oct-2016 15:00:00, NaN  
26-Oct-2016 16:00:00, NaN  
26-Oct-2016 17:00:00, NaN  
26-Oct-2016 18:00:00, NaN  
26-Oct-2016 19:00:00, NaN  
26-Oct-2016 20:00:00, NaN  
26-Oct-2016 21:00:00, NaN  
26-Oct-2016 22:00:00, NaN  
26-Oct-2016 23:00:00, NaN  
27-Oct-2016, NaN  
27-Oct-2016 01:00:00, NaN

27-Oct-2016 02:00:00, NaN  
27-Oct-2016 03:00:00, NaN  
27-Oct-2016 04:00:00, NaN  
27-Oct-2016 05:00:00, NaN  
27-Oct-2016 06:00:00, NaN  
27-Oct-2016 07:00:00, NaN  
27-Oct-2016 08:00:00, NaN  
27-Oct-2016 09:00:00, NaN  
27-Oct-2016 10:00:00, NaN  
27-Oct-2016 11:00:00, NaN  
27-Oct-2016 12:00:00, NaN  
27-Oct-2016 13:00:00, NaN  
27-Oct-2016 14:00:00, NaN  
27-Oct-2016 15:00:00, NaN  
27-Oct-2016 16:00:00, NaN  
27-Oct-2016 17:00:00, NaN  
27-Oct-2016 18:00:00, NaN  
27-Oct-2016 19:00:00, NaN  
27-Oct-2016 20:00:00, NaN  
27-Oct-2016 21:00:00, NaN  
27-Oct-2016 22:00:00, NaN  
27-Oct-2016 23:00:00, NaN  
28-Oct-2016, NaN  
28-Oct-2016 01:00:00, NaN  
28-Oct-2016 02:00:00, NaN  
28-Oct-2016 03:00:00, NaN  
28-Oct-2016 04:00:00, NaN  
28-Oct-2016 05:00:00, NaN  
28-Oct-2016 06:00:00, NaN  
28-Oct-2016 07:00:00, NaN  
28-Oct-2016 08:00:00, NaN  
28-Oct-2016 09:00:00, NaN  
28-Oct-2016 10:00:00, NaN  
28-Oct-2016 11:00:00, NaN  
28-Oct-2016 12:00:00, NaN  
28-Oct-2016 13:00:00, NaN  
28-Oct-2016 14:00:00, NaN  
28-Oct-2016 15:00:00, NaN  
28-Oct-2016 16:00:00, NaN  
28-Oct-2016 17:00:00, NaN  
28-Oct-2016 18:00:00, NaN  
28-Oct-2016 19:00:00, NaN  
28-Oct-2016 20:00:00, NaN  
28-Oct-2016 21:00:00, NaN  
28-Oct-2016 22:00:00, NaN  
28-Oct-2016 23:00:00, NaN  
29-Oct-2016, NaN  
29-Oct-2016 01:00:00, NaN  
29-Oct-2016 02:00:00, NaN  
29-Oct-2016 03:00:00, NaN  
29-Oct-2016 04:00:00, NaN  
29-Oct-2016 05:00:00, NaN  
29-Oct-2016 06:00:00, NaN  
29-Oct-2016 07:00:00, NaN  
29-Oct-2016 08:00:00, NaN  
29-Oct-2016 09:00:00, NaN  
29-Oct-2016 10:00:00, NaN  
29-Oct-2016 11:00:00, NaN  
29-Oct-2016 12:00:00, NaN  
29-Oct-2016 13:00:00, NaN  
29-Oct-2016 14:00:00, NaN  
29-Oct-2016 15:00:00, NaN  
29-Oct-2016 16:00:00, NaN  
29-Oct-2016 17:00:00, NaN

|              |           |     |
|--------------|-----------|-----|
| 29-Oct-2016  | 18:00:00, | NaN |
| 29-Oct-2016  | 19:00:00, | NaN |
| 29-Oct-2016  | 20:00:00, | NaN |
| 29-Oct-2016  | 21:00:00, | NaN |
| 29-Oct-2016  | 22:00:00, | NaN |
| 29-Oct-2016  | 23:00:00, | NaN |
| 30-Oct-2016, | NaN       |     |
| 30-Oct-2016  | 01:00:00, | NaN |
| 30-Oct-2016  | 02:00:00, | NaN |
| 30-Oct-2016  | 03:00:00, | NaN |
| 30-Oct-2016  | 04:00:00, | NaN |
| 30-Oct-2016  | 05:00:00, | NaN |
| 30-Oct-2016  | 06:00:00, | NaN |
| 30-Oct-2016  | 07:00:00, | NaN |
| 30-Oct-2016  | 08:00:00, | NaN |
| 30-Oct-2016  | 09:00:00, | NaN |
| 30-Oct-2016  | 10:00:00, | NaN |
| 30-Oct-2016  | 11:00:00, | NaN |
| 30-Oct-2016  | 12:00:00, | NaN |
| 30-Oct-2016  | 13:00:00, | NaN |
| 30-Oct-2016  | 14:00:00, | NaN |
| 30-Oct-2016  | 15:00:00, | NaN |
| 30-Oct-2016  | 16:00:00, | NaN |
| 30-Oct-2016  | 17:00:00, | NaN |
| 30-Oct-2016  | 18:00:00, | NaN |
| 30-Oct-2016  | 19:00:00, | NaN |
| 30-Oct-2016  | 20:00:00, | NaN |
| 30-Oct-2016  | 21:00:00, | NaN |
| 30-Oct-2016  | 22:00:00, | NaN |
| 30-Oct-2016  | 23:00:00, | NaN |
| 31-Oct-2016, | NaN       |     |
| 31-Oct-2016  | 01:00:00, | NaN |
| 31-Oct-2016  | 02:00:00, | NaN |
| 31-Oct-2016  | 03:00:00, | NaN |
| 31-Oct-2016  | 04:00:00, | NaN |
| 31-Oct-2016  | 05:00:00, | NaN |
| 31-Oct-2016  | 06:00:00, | NaN |
| 31-Oct-2016  | 07:00:00, | NaN |
| 31-Oct-2016  | 08:00:00, | NaN |
| 31-Oct-2016  | 09:00:00, | NaN |
| 31-Oct-2016  | 10:00:00, | NaN |
| 31-Oct-2016  | 11:00:00, | NaN |
| 31-Oct-2016  | 12:00:00, | NaN |
| 31-Oct-2016  | 13:00:00, | NaN |
| 31-Oct-2016  | 14:00:00, | NaN |
| 31-Oct-2016  | 15:00:00, | NaN |
| 31-Oct-2016  | 16:00:00, | NaN |
| 31-Oct-2016  | 17:00:00, | NaN |
| 31-Oct-2016  | 18:00:00, | NaN |
| 31-Oct-2016  | 19:00:00, | NaN |
| 31-Oct-2016  | 20:00:00, | NaN |
| 31-Oct-2016  | 21:00:00, | NaN |
| 31-Oct-2016  | 22:00:00, | NaN |
| 31-Oct-2016  | 23:00:00, | NaN |
| 01-Nov-2016, | NaN       |     |
| 01-Nov-2016  | 01:00:00, | NaN |
| 01-Nov-2016  | 02:00:00, | NaN |
| 01-Nov-2016  | 03:00:00, | NaN |
| 01-Nov-2016  | 04:00:00, | NaN |
| 01-Nov-2016  | 05:00:00, | NaN |
| 01-Nov-2016  | 06:00:00, | NaN |
| 01-Nov-2016  | 07:00:00, | NaN |
| 01-Nov-2016  | 08:00:00, | NaN |
| 01-Nov-2016  | 09:00:00, | NaN |

01-Nov-2016 10:00:00, NaN  
01-Nov-2016 11:00:00, NaN  
01-Nov-2016 12:00:00, NaN  
01-Nov-2016 13:00:00, NaN  
01-Nov-2016 14:00:00, NaN  
01-Nov-2016 15:00:00, NaN  
01-Nov-2016 16:00:00, NaN  
01-Nov-2016 17:00:00, NaN  
01-Nov-2016 18:00:00, NaN  
01-Nov-2016 19:00:00, NaN  
01-Nov-2016 20:00:00, NaN  
01-Nov-2016 21:00:00, NaN  
01-Nov-2016 22:00:00, NaN  
01-Nov-2016 23:00:00, NaN  
02-Nov-2016, NaN  
02-Nov-2016 01:00:00, NaN  
02-Nov-2016 02:00:00, NaN  
02-Nov-2016 03:00:00, NaN  
02-Nov-2016 04:00:00, NaN  
02-Nov-2016 05:00:00, NaN  
02-Nov-2016 06:00:00, NaN  
02-Nov-2016 07:00:00, NaN  
02-Nov-2016 08:00:00, NaN  
02-Nov-2016 09:00:00, NaN  
02-Nov-2016 10:00:00, NaN  
02-Nov-2016 11:00:00, NaN  
02-Nov-2016 12:00:00, NaN  
02-Nov-2016 13:00:00, NaN  
02-Nov-2016 14:00:00, NaN  
02-Nov-2016 15:00:00, NaN  
02-Nov-2016 16:00:00, NaN  
02-Nov-2016 17:00:00, NaN  
02-Nov-2016 18:00:00, NaN  
02-Nov-2016 19:00:00, NaN  
02-Nov-2016 20:00:00, NaN  
02-Nov-2016 21:00:00, NaN  
02-Nov-2016 22:00:00, NaN  
02-Nov-2016 23:00:00, NaN  
03-Nov-2016, NaN  
03-Nov-2016 01:00:00, NaN  
03-Nov-2016 02:00:00, NaN  
03-Nov-2016 03:00:00, NaN  
03-Nov-2016 04:00:00, NaN  
03-Nov-2016 05:00:00, NaN  
03-Nov-2016 06:00:00, NaN  
03-Nov-2016 07:00:00, NaN  
03-Nov-2016 08:00:00, NaN  
03-Nov-2016 09:00:00, NaN  
03-Nov-2016 10:00:00, NaN  
03-Nov-2016 11:00:00, NaN  
03-Nov-2016 12:00:00, NaN  
03-Nov-2016 13:00:00, NaN  
03-Nov-2016 14:00:00, NaN  
03-Nov-2016 15:00:00, NaN  
03-Nov-2016 16:00:00, NaN  
03-Nov-2016 17:00:00, NaN  
03-Nov-2016 18:00:00, NaN  
03-Nov-2016 19:00:00, NaN  
03-Nov-2016 20:00:00, NaN  
03-Nov-2016 21:00:00, NaN  
03-Nov-2016 22:00:00, NaN  
03-Nov-2016 23:00:00, NaN  
04-Nov-2016, NaN  
04-Nov-2016 01:00:00, NaN

|              |           |     |
|--------------|-----------|-----|
| 04-Nov-2016  | 02:00:00, | NaN |
| 04-Nov-2016  | 03:00:00, | NaN |
| 04-Nov-2016  | 04:00:00, | NaN |
| 04-Nov-2016  | 05:00:00, | NaN |
| 04-Nov-2016  | 06:00:00, | NaN |
| 04-Nov-2016  | 07:00:00, | NaN |
| 04-Nov-2016  | 08:00:00, | NaN |
| 04-Nov-2016  | 09:00:00, | NaN |
| 04-Nov-2016  | 10:00:00, | NaN |
| 04-Nov-2016  | 11:00:00, | NaN |
| 04-Nov-2016  | 12:00:00, | NaN |
| 04-Nov-2016  | 13:00:00, | NaN |
| 04-Nov-2016  | 14:00:00, | NaN |
| 04-Nov-2016  | 15:00:00, | NaN |
| 04-Nov-2016  | 16:00:00, | NaN |
| 04-Nov-2016  | 17:00:00, | NaN |
| 04-Nov-2016  | 18:00:00, | NaN |
| 04-Nov-2016  | 19:00:00, | NaN |
| 04-Nov-2016  | 20:00:00, | NaN |
| 04-Nov-2016  | 21:00:00, | NaN |
| 04-Nov-2016  | 22:00:00, | NaN |
| 04-Nov-2016  | 23:00:00, | NaN |
| 05-Nov-2016, | NaN       |     |
| 05-Nov-2016  | 01:00:00, | NaN |
| 05-Nov-2016  | 02:00:00, | NaN |
| 05-Nov-2016  | 03:00:00, | NaN |
| 05-Nov-2016  | 04:00:00, | NaN |
| 05-Nov-2016  | 05:00:00, | NaN |
| 05-Nov-2016  | 06:00:00, | NaN |
| 05-Nov-2016  | 07:00:00, | NaN |
| 05-Nov-2016  | 08:00:00, | NaN |
| 05-Nov-2016  | 09:00:00, | NaN |
| 05-Nov-2016  | 10:00:00, | NaN |
| 05-Nov-2016  | 11:00:00, | NaN |
| 05-Nov-2016  | 12:00:00, | NaN |
| 05-Nov-2016  | 13:00:00, | NaN |
| 05-Nov-2016  | 14:00:00, | NaN |
| 05-Nov-2016  | 15:00:00, | NaN |
| 05-Nov-2016  | 16:00:00, | NaN |
| 05-Nov-2016  | 17:00:00, | NaN |
| 05-Nov-2016  | 18:00:00, | NaN |
| 05-Nov-2016  | 19:00:00, | NaN |
| 05-Nov-2016  | 20:00:00, | NaN |
| 05-Nov-2016  | 21:00:00, | NaN |
| 05-Nov-2016  | 22:00:00, | NaN |
| 05-Nov-2016  | 23:00:00, | NaN |
| 06-Nov-2016, | NaN       |     |
| 06-Nov-2016  | 01:00:00, | NaN |
| 06-Nov-2016  | 02:00:00, | NaN |
| 06-Nov-2016  | 03:00:00, | NaN |
| 06-Nov-2016  | 04:00:00, | NaN |
| 06-Nov-2016  | 05:00:00, | NaN |
| 06-Nov-2016  | 06:00:00, | NaN |
| 06-Nov-2016  | 07:00:00, | NaN |
| 06-Nov-2016  | 08:00:00, | NaN |
| 06-Nov-2016  | 09:00:00, | NaN |
| 06-Nov-2016  | 10:00:00, | NaN |
| 06-Nov-2016  | 11:00:00, | NaN |
| 06-Nov-2016  | 12:00:00, | NaN |
| 06-Nov-2016  | 13:00:00, | NaN |
| 06-Nov-2016  | 14:00:00, | NaN |
| 06-Nov-2016  | 15:00:00, | NaN |
| 06-Nov-2016  | 16:00:00, | NaN |
| 06-Nov-2016  | 17:00:00, | NaN |

06-Nov-2016 18:00:00, NaN  
06-Nov-2016 19:00:00, NaN  
06-Nov-2016 20:00:00, NaN  
06-Nov-2016 21:00:00, NaN  
06-Nov-2016 22:00:00, NaN  
06-Nov-2016 23:00:00, NaN  
07-Nov-2016, NaN  
07-Nov-2016 01:00:00, NaN  
07-Nov-2016 02:00:00, NaN  
07-Nov-2016 03:00:00, NaN  
07-Nov-2016 04:00:00, NaN  
07-Nov-2016 05:00:00, NaN  
07-Nov-2016 06:00:00, NaN  
07-Nov-2016 07:00:00, NaN  
07-Nov-2016 08:00:00, NaN  
07-Nov-2016 09:00:00, NaN  
07-Nov-2016 10:00:00, NaN  
07-Nov-2016 11:00:00, NaN  
07-Nov-2016 12:00:00, NaN  
07-Nov-2016 13:00:00, NaN  
07-Nov-2016 14:00:00, NaN  
07-Nov-2016 15:00:00, NaN  
07-Nov-2016 16:00:00, NaN  
07-Nov-2016 17:00:00, NaN  
07-Nov-2016 18:00:00, NaN  
07-Nov-2016 19:00:00, NaN  
07-Nov-2016 20:00:00, NaN  
07-Nov-2016 21:00:00, NaN  
07-Nov-2016 22:00:00, NaN  
07-Nov-2016 23:00:00, NaN  
08-Nov-2016, NaN  
08-Nov-2016 01:00:00, NaN  
08-Nov-2016 02:00:00, NaN  
08-Nov-2016 03:00:00, NaN  
08-Nov-2016 04:00:00, NaN  
08-Nov-2016 05:00:00, NaN  
08-Nov-2016 06:00:00, NaN  
08-Nov-2016 07:00:00, NaN  
08-Nov-2016 08:00:00, NaN  
08-Nov-2016 09:00:00, NaN  
08-Nov-2016 10:00:00, NaN  
08-Nov-2016 11:00:00, NaN  
08-Nov-2016 12:00:00, NaN  
08-Nov-2016 13:00:00, NaN  
08-Nov-2016 14:00:00, NaN  
08-Nov-2016 15:00:00, NaN  
08-Nov-2016 16:00:00, NaN  
08-Nov-2016 17:00:00, NaN  
08-Nov-2016 18:00:00, NaN  
08-Nov-2016 19:00:00, NaN  
08-Nov-2016 20:00:00, NaN  
08-Nov-2016 21:00:00, NaN  
08-Nov-2016 22:00:00, NaN  
08-Nov-2016 23:00:00, NaN  
09-Nov-2016, NaN  
09-Nov-2016 01:00:00, NaN  
09-Nov-2016 02:00:00, NaN  
09-Nov-2016 03:00:00, NaN  
09-Nov-2016 04:00:00, NaN  
09-Nov-2016 05:00:00, NaN  
09-Nov-2016 06:00:00, NaN  
09-Nov-2016 07:00:00, NaN  
09-Nov-2016 08:00:00, NaN  
09-Nov-2016 09:00:00, NaN

09-Nov-2016 10:00:00, NaN  
09-Nov-2016 11:00:00, NaN  
09-Nov-2016 12:00:00, NaN  
09-Nov-2016 13:00:00, NaN  
09-Nov-2016 14:00:00, NaN  
09-Nov-2016 15:00:00, NaN  
09-Nov-2016 16:00:00, NaN  
09-Nov-2016 17:00:00, NaN  
09-Nov-2016 18:00:00, NaN  
09-Nov-2016 19:00:00, NaN  
09-Nov-2016 20:00:00, NaN  
09-Nov-2016 21:00:00, NaN  
09-Nov-2016 22:00:00, NaN  
09-Nov-2016 23:00:00, NaN  
10-Nov-2016, NaN  
10-Nov-2016 01:00:00, NaN  
10-Nov-2016 02:00:00, NaN  
10-Nov-2016 03:00:00, NaN  
10-Nov-2016 04:00:00, NaN  
10-Nov-2016 05:00:00, NaN  
10-Nov-2016 06:00:00, NaN  
10-Nov-2016 07:00:00, NaN  
10-Nov-2016 08:00:00, NaN  
10-Nov-2016 09:00:00, NaN  
10-Nov-2016 10:00:00, NaN  
10-Nov-2016 11:00:00, NaN  
10-Nov-2016 12:00:00, NaN  
10-Nov-2016 13:00:00, NaN  
10-Nov-2016 14:00:00, NaN  
10-Nov-2016 15:00:00, NaN  
10-Nov-2016 16:00:00, NaN  
10-Nov-2016 17:00:00, NaN  
10-Nov-2016 18:00:00, NaN  
10-Nov-2016 19:00:00, NaN  
10-Nov-2016 20:00:00, NaN  
10-Nov-2016 21:00:00, NaN  
10-Nov-2016 22:00:00, NaN  
10-Nov-2016 23:00:00, NaN  
11-Nov-2016, NaN  
11-Nov-2016 01:00:00, NaN  
11-Nov-2016 02:00:00, NaN  
11-Nov-2016 03:00:00, NaN  
11-Nov-2016 04:00:00, NaN  
11-Nov-2016 05:00:00, NaN  
11-Nov-2016 06:00:00, NaN  
11-Nov-2016 07:00:00, NaN  
11-Nov-2016 08:00:00, NaN  
11-Nov-2016 09:00:00, NaN  
11-Nov-2016 10:00:00, NaN  
11-Nov-2016 11:00:00, NaN  
11-Nov-2016 12:00:00, NaN  
11-Nov-2016 13:00:00, NaN  
11-Nov-2016 14:00:00, NaN  
11-Nov-2016 15:00:00, NaN  
11-Nov-2016 16:00:00, NaN  
11-Nov-2016 17:00:00, NaN  
11-Nov-2016 18:00:00, NaN  
11-Nov-2016 19:00:00, NaN  
11-Nov-2016 20:00:00, NaN  
11-Nov-2016 21:00:00, NaN  
11-Nov-2016 22:00:00, NaN  
11-Nov-2016 23:00:00, NaN  
12-Nov-2016, NaN  
12-Nov-2016 01:00:00, NaN



|              |           |     |
|--------------|-----------|-----|
| 12-Nov-2016  | 02:00:00, | NaN |
| 12-Nov-2016  | 03:00:00, | NaN |
| 12-Nov-2016  | 04:00:00, | NaN |
| 12-Nov-2016  | 05:00:00, | NaN |
| 12-Nov-2016  | 06:00:00, | NaN |
| 12-Nov-2016  | 07:00:00, | NaN |
| 12-Nov-2016  | 08:00:00, | NaN |
| 12-Nov-2016  | 09:00:00, | NaN |
| 12-Nov-2016  | 10:00:00, | NaN |
| 12-Nov-2016  | 11:00:00, | NaN |
| 12-Nov-2016  | 12:00:00, | NaN |
| 12-Nov-2016  | 13:00:00, | NaN |
| 12-Nov-2016  | 14:00:00, | NaN |
| 12-Nov-2016  | 15:00:00, | NaN |
| 12-Nov-2016  | 16:00:00, | NaN |
| 12-Nov-2016  | 17:00:00, | NaN |
| 12-Nov-2016  | 18:00:00, | NaN |
| 12-Nov-2016  | 19:00:00, | NaN |
| 12-Nov-2016  | 20:00:00, | NaN |
| 12-Nov-2016  | 21:00:00, | NaN |
| 12-Nov-2016  | 22:00:00, | NaN |
| 12-Nov-2016  | 23:00:00, | NaN |
| 13-Nov-2016, | NaN       |     |
| 13-Nov-2016  | 01:00:00, | NaN |
| 13-Nov-2016  | 02:00:00, | NaN |
| 13-Nov-2016  | 03:00:00, | NaN |
| 13-Nov-2016  | 04:00:00, | NaN |
| 13-Nov-2016  | 05:00:00, | NaN |
| 13-Nov-2016  | 06:00:00, | NaN |
| 13-Nov-2016  | 07:00:00, | NaN |
| 13-Nov-2016  | 08:00:00, | NaN |
| 13-Nov-2016  | 09:00:00, | NaN |
| 13-Nov-2016  | 10:00:00, | NaN |
| 13-Nov-2016  | 11:00:00, | NaN |
| 13-Nov-2016  | 12:00:00, | NaN |
| 13-Nov-2016  | 13:00:00, | NaN |
| 13-Nov-2016  | 14:00:00, | NaN |
| 13-Nov-2016  | 15:00:00, | NaN |
| 13-Nov-2016  | 16:00:00, | NaN |
| 13-Nov-2016  | 17:00:00, | NaN |
| 13-Nov-2016  | 18:00:00, | NaN |
| 13-Nov-2016  | 19:00:00, | NaN |
| 13-Nov-2016  | 20:00:00, | NaN |
| 13-Nov-2016  | 21:00:00, | NaN |
| 13-Nov-2016  | 22:00:00, | NaN |
| 13-Nov-2016  | 23:00:00, | NaN |
| 14-Nov-2016, | NaN       |     |
| 14-Nov-2016  | 01:00:00, | NaN |
| 14-Nov-2016  | 02:00:00, | NaN |
| 14-Nov-2016  | 03:00:00, | NaN |
| 14-Nov-2016  | 04:00:00, | NaN |
| 14-Nov-2016  | 05:00:00, | NaN |
| 14-Nov-2016  | 06:00:00, | NaN |
| 14-Nov-2016  | 07:00:00, | NaN |
| 14-Nov-2016  | 08:00:00, | NaN |
| 14-Nov-2016  | 09:00:00, | NaN |
| 14-Nov-2016  | 10:00:00, | NaN |
| 14-Nov-2016  | 11:00:00, | NaN |
| 14-Nov-2016  | 12:00:00, | NaN |
| 14-Nov-2016  | 13:00:00, | NaN |
| 14-Nov-2016  | 14:00:00, | NaN |
| 14-Nov-2016  | 15:00:00, | NaN |
| 14-Nov-2016  | 16:00:00, | NaN |
| 14-Nov-2016  | 17:00:00, | NaN |

|              |           |     |
|--------------|-----------|-----|
| 14-Nov-2016  | 18:00:00, | NaN |
| 14-Nov-2016  | 19:00:00, | NaN |
| 14-Nov-2016  | 20:00:00, | NaN |
| 14-Nov-2016  | 21:00:00, | NaN |
| 14-Nov-2016  | 22:00:00, | NaN |
| 14-Nov-2016  | 23:00:00, | NaN |
| 15-Nov-2016, | NaN       |     |
| 15-Nov-2016  | 01:00:00, | NaN |
| 15-Nov-2016  | 02:00:00, | NaN |
| 15-Nov-2016  | 03:00:00, | NaN |
| 15-Nov-2016  | 04:00:00, | NaN |
| 15-Nov-2016  | 05:00:00, | NaN |
| 15-Nov-2016  | 06:00:00, | NaN |
| 15-Nov-2016  | 07:00:00, | NaN |
| 15-Nov-2016  | 08:00:00, | NaN |
| 15-Nov-2016  | 09:00:00, | NaN |
| 15-Nov-2016  | 10:00:00, | NaN |
| 15-Nov-2016  | 11:00:00, | NaN |
| 15-Nov-2016  | 12:00:00, | NaN |
| 15-Nov-2016  | 13:00:00, | NaN |
| 15-Nov-2016  | 14:00:00, | NaN |
| 15-Nov-2016  | 15:00:00, | NaN |
| 15-Nov-2016  | 16:00:00, | NaN |
| 15-Nov-2016  | 17:00:00, | NaN |
| 15-Nov-2016  | 18:00:00, | NaN |
| 15-Nov-2016  | 19:00:00, | NaN |
| 15-Nov-2016  | 20:00:00, | NaN |
| 15-Nov-2016  | 21:00:00, | NaN |
| 15-Nov-2016  | 22:00:00, | NaN |
| 15-Nov-2016  | 23:00:00, | NaN |
| 16-Nov-2016, | NaN       |     |
| 16-Nov-2016  | 01:00:00, | NaN |
| 16-Nov-2016  | 02:00:00, | NaN |
| 16-Nov-2016  | 03:00:00, | NaN |
| 16-Nov-2016  | 04:00:00, | NaN |
| 16-Nov-2016  | 05:00:00, | NaN |
| 16-Nov-2016  | 06:00:00, | NaN |
| 16-Nov-2016  | 07:00:00, | NaN |
| 16-Nov-2016  | 08:00:00, | NaN |
| 16-Nov-2016  | 09:00:00, | NaN |
| 16-Nov-2016  | 10:00:00, | NaN |
| 16-Nov-2016  | 11:00:00, | NaN |
| 16-Nov-2016  | 12:00:00, | NaN |
| 16-Nov-2016  | 13:00:00, | NaN |
| 16-Nov-2016  | 14:00:00, | NaN |
| 16-Nov-2016  | 15:00:00, | NaN |
| 16-Nov-2016  | 16:00:00, | NaN |
| 16-Nov-2016  | 17:00:00, | NaN |
| 16-Nov-2016  | 18:00:00, | NaN |
| 16-Nov-2016  | 19:00:00, | NaN |
| 16-Nov-2016  | 20:00:00, | NaN |
| 16-Nov-2016  | 21:00:00, | NaN |
| 16-Nov-2016  | 22:00:00, | NaN |
| 16-Nov-2016  | 23:00:00, | NaN |
| 17-Nov-2016, | NaN       |     |
| 17-Nov-2016  | 01:00:00, | NaN |
| 17-Nov-2016  | 02:00:00, | NaN |
| 17-Nov-2016  | 03:00:00, | NaN |
| 17-Nov-2016  | 04:00:00, | NaN |
| 17-Nov-2016  | 05:00:00, | NaN |
| 17-Nov-2016  | 06:00:00, | NaN |
| 17-Nov-2016  | 07:00:00, | NaN |
| 17-Nov-2016  | 08:00:00, | NaN |
| 17-Nov-2016  | 09:00:00, | NaN |

17-Nov-2016 10:00:00, NaN  
17-Nov-2016 11:00:00, NaN  
17-Nov-2016 12:00:00, NaN  
17-Nov-2016 13:00:00, NaN  
17-Nov-2016 14:00:00, NaN  
17-Nov-2016 15:00:00, NaN  
17-Nov-2016 16:00:00, NaN  
17-Nov-2016 17:00:00, NaN  
17-Nov-2016 18:00:00, NaN  
17-Nov-2016 19:00:00, NaN  
17-Nov-2016 20:00:00, NaN  
17-Nov-2016 21:00:00, NaN  
17-Nov-2016 22:00:00, NaN  
17-Nov-2016 23:00:00, NaN  
18-Nov-2016, NaN  
18-Nov-2016 01:00:00, NaN  
18-Nov-2016 02:00:00, NaN  
18-Nov-2016 03:00:00, NaN  
18-Nov-2016 04:00:00, NaN  
18-Nov-2016 05:00:00, NaN  
18-Nov-2016 06:00:00, NaN  
18-Nov-2016 07:00:00, NaN  
18-Nov-2016 08:00:00, NaN  
18-Nov-2016 09:00:00, NaN  
18-Nov-2016 10:00:00, NaN  
18-Nov-2016 11:00:00, NaN  
18-Nov-2016 12:00:00, NaN  
18-Nov-2016 13:00:00, NaN  
18-Nov-2016 14:00:00, NaN  
18-Nov-2016 15:00:00, NaN  
18-Nov-2016 16:00:00, NaN  
18-Nov-2016 17:00:00, NaN  
18-Nov-2016 18:00:00, NaN  
18-Nov-2016 19:00:00, NaN  
18-Nov-2016 20:00:00, NaN  
18-Nov-2016 21:00:00, NaN  
18-Nov-2016 22:00:00, NaN  
18-Nov-2016 23:00:00, NaN  
19-Nov-2016, NaN  
19-Nov-2016 01:00:00, NaN  
19-Nov-2016 02:00:00, NaN  
19-Nov-2016 03:00:00, NaN  
19-Nov-2016 04:00:00, NaN  
19-Nov-2016 05:00:00, NaN  
19-Nov-2016 06:00:00, NaN  
19-Nov-2016 07:00:00, NaN  
19-Nov-2016 08:00:00, NaN  
19-Nov-2016 09:00:00, NaN  
19-Nov-2016 10:00:00, NaN  
19-Nov-2016 11:00:00, NaN  
19-Nov-2016 12:00:00, NaN  
19-Nov-2016 13:00:00, NaN  
19-Nov-2016 14:00:00, NaN  
19-Nov-2016 15:00:00, NaN  
19-Nov-2016 16:00:00, NaN  
19-Nov-2016 17:00:00, NaN  
19-Nov-2016 18:00:00, NaN  
19-Nov-2016 19:00:00, NaN  
19-Nov-2016 20:00:00, NaN  
19-Nov-2016 21:00:00, NaN  
19-Nov-2016 22:00:00, NaN  
19-Nov-2016 23:00:00, NaN  
20-Nov-2016, NaN  
20-Nov-2016 01:00:00, NaN

|              |           |     |
|--------------|-----------|-----|
| 20-Nov-2016  | 02:00:00, | NaN |
| 20-Nov-2016  | 03:00:00, | NaN |
| 20-Nov-2016  | 04:00:00, | NaN |
| 20-Nov-2016  | 05:00:00, | NaN |
| 20-Nov-2016  | 06:00:00, | NaN |
| 20-Nov-2016  | 07:00:00, | NaN |
| 20-Nov-2016  | 08:00:00, | NaN |
| 20-Nov-2016  | 09:00:00, | NaN |
| 20-Nov-2016  | 10:00:00, | NaN |
| 20-Nov-2016  | 11:00:00, | NaN |
| 20-Nov-2016  | 12:00:00, | NaN |
| 20-Nov-2016  | 13:00:00, | NaN |
| 20-Nov-2016  | 14:00:00, | NaN |
| 20-Nov-2016  | 15:00:00, | NaN |
| 20-Nov-2016  | 16:00:00, | NaN |
| 20-Nov-2016  | 17:00:00, | NaN |
| 20-Nov-2016  | 18:00:00, | NaN |
| 20-Nov-2016  | 19:00:00, | NaN |
| 20-Nov-2016  | 20:00:00, | NaN |
| 20-Nov-2016  | 21:00:00, | NaN |
| 20-Nov-2016  | 22:00:00, | NaN |
| 20-Nov-2016  | 23:00:00, | NaN |
| 21-Nov-2016, | NaN       |     |
| 21-Nov-2016  | 01:00:00, | NaN |
| 21-Nov-2016  | 02:00:00, | NaN |
| 21-Nov-2016  | 03:00:00, | NaN |
| 21-Nov-2016  | 04:00:00, | NaN |
| 21-Nov-2016  | 05:00:00, | NaN |
| 21-Nov-2016  | 06:00:00, | NaN |
| 21-Nov-2016  | 07:00:00, | NaN |
| 21-Nov-2016  | 08:00:00, | NaN |
| 21-Nov-2016  | 09:00:00, | NaN |
| 21-Nov-2016  | 10:00:00, | NaN |
| 21-Nov-2016  | 11:00:00, | NaN |
| 21-Nov-2016  | 12:00:00, | NaN |
| 21-Nov-2016  | 13:00:00, | NaN |
| 21-Nov-2016  | 14:00:00, | NaN |
| 21-Nov-2016  | 15:00:00, | NaN |
| 21-Nov-2016  | 16:00:00, | NaN |
| 21-Nov-2016  | 17:00:00, | NaN |
| 21-Nov-2016  | 18:00:00, | NaN |
| 21-Nov-2016  | 19:00:00, | NaN |
| 21-Nov-2016  | 20:00:00, | NaN |
| 21-Nov-2016  | 21:00:00, | NaN |
| 21-Nov-2016  | 22:00:00, | NaN |
| 21-Nov-2016  | 23:00:00, | NaN |
| 22-Nov-2016, | NaN       |     |
| 22-Nov-2016  | 01:00:00, | NaN |
| 22-Nov-2016  | 02:00:00, | NaN |
| 22-Nov-2016  | 03:00:00, | NaN |
| 22-Nov-2016  | 04:00:00, | NaN |
| 22-Nov-2016  | 05:00:00, | NaN |
| 22-Nov-2016  | 06:00:00, | NaN |
| 22-Nov-2016  | 07:00:00, | NaN |
| 22-Nov-2016  | 08:00:00, | NaN |
| 22-Nov-2016  | 09:00:00, | NaN |
| 22-Nov-2016  | 10:00:00, | NaN |
| 22-Nov-2016  | 11:00:00, | NaN |
| 22-Nov-2016  | 12:00:00, | NaN |
| 22-Nov-2016  | 13:00:00, | NaN |
| 22-Nov-2016  | 14:00:00, | NaN |
| 22-Nov-2016  | 15:00:00, | NaN |
| 22-Nov-2016  | 16:00:00, | NaN |
| 22-Nov-2016  | 17:00:00, | NaN |

|              |           |     |
|--------------|-----------|-----|
| 22-Nov-2016  | 18:00:00, | NaN |
| 22-Nov-2016  | 19:00:00, | NaN |
| 22-Nov-2016  | 20:00:00, | NaN |
| 22-Nov-2016  | 21:00:00, | NaN |
| 22-Nov-2016  | 22:00:00, | NaN |
| 22-Nov-2016  | 23:00:00, | NaN |
| 23-Nov-2016, | NaN       |     |
| 23-Nov-2016  | 01:00:00, | NaN |
| 23-Nov-2016  | 02:00:00, | NaN |
| 23-Nov-2016  | 03:00:00, | NaN |
| 23-Nov-2016  | 04:00:00, | NaN |
| 23-Nov-2016  | 05:00:00, | NaN |
| 23-Nov-2016  | 06:00:00, | NaN |
| 23-Nov-2016  | 07:00:00, | NaN |
| 23-Nov-2016  | 08:00:00, | NaN |
| 23-Nov-2016  | 09:00:00, | NaN |
| 23-Nov-2016  | 10:00:00, | NaN |
| 23-Nov-2016  | 11:00:00, | NaN |
| 23-Nov-2016  | 12:00:00, | NaN |
| 23-Nov-2016  | 13:00:00, | NaN |
| 23-Nov-2016  | 14:00:00, | NaN |
| 23-Nov-2016  | 15:00:00, | NaN |
| 23-Nov-2016  | 16:00:00, | NaN |
| 23-Nov-2016  | 17:00:00, | NaN |
| 23-Nov-2016  | 18:00:00, | NaN |
| 23-Nov-2016  | 19:00:00, | NaN |
| 23-Nov-2016  | 20:00:00, | NaN |
| 23-Nov-2016  | 21:00:00, | NaN |
| 23-Nov-2016  | 22:00:00, | NaN |
| 23-Nov-2016  | 23:00:00, | NaN |
| 24-Nov-2016, | NaN       |     |
| 24-Nov-2016  | 01:00:00, | NaN |
| 24-Nov-2016  | 02:00:00, | NaN |
| 24-Nov-2016  | 03:00:00, | NaN |
| 24-Nov-2016  | 04:00:00, | NaN |
| 24-Nov-2016  | 05:00:00, | NaN |
| 24-Nov-2016  | 06:00:00, | NaN |
| 24-Nov-2016  | 07:00:00, | NaN |
| 24-Nov-2016  | 08:00:00, | NaN |
| 24-Nov-2016  | 09:00:00, | NaN |
| 24-Nov-2016  | 10:00:00, | NaN |
| 24-Nov-2016  | 11:00:00, | NaN |
| 24-Nov-2016  | 12:00:00, | NaN |
| 24-Nov-2016  | 13:00:00, | NaN |
| 24-Nov-2016  | 14:00:00, | NaN |
| 24-Nov-2016  | 15:00:00, | NaN |
| 24-Nov-2016  | 16:00:00, | NaN |
| 24-Nov-2016  | 17:00:00, | NaN |
| 24-Nov-2016  | 18:00:00, | NaN |
| 24-Nov-2016  | 19:00:00, | NaN |
| 24-Nov-2016  | 20:00:00, | NaN |
| 24-Nov-2016  | 21:00:00, | NaN |
| 24-Nov-2016  | 22:00:00, | NaN |
| 24-Nov-2016  | 23:00:00, | NaN |
| 25-Nov-2016, | NaN       |     |
| 25-Nov-2016  | 01:00:00, | NaN |
| 25-Nov-2016  | 02:00:00, | NaN |
| 25-Nov-2016  | 03:00:00, | NaN |
| 25-Nov-2016  | 04:00:00, | NaN |
| 25-Nov-2016  | 05:00:00, | NaN |
| 25-Nov-2016  | 06:00:00, | NaN |
| 25-Nov-2016  | 07:00:00, | NaN |
| 25-Nov-2016  | 08:00:00, | NaN |
| 25-Nov-2016  | 09:00:00, | NaN |

|              |           |     |
|--------------|-----------|-----|
| 25-Nov-2016  | 10:00:00, | NaN |
| 25-Nov-2016  | 11:00:00, | NaN |
| 25-Nov-2016  | 12:00:00, | NaN |
| 25-Nov-2016  | 13:00:00, | NaN |
| 25-Nov-2016  | 14:00:00, | NaN |
| 25-Nov-2016  | 15:00:00, | NaN |
| 25-Nov-2016  | 16:00:00, | NaN |
| 25-Nov-2016  | 17:00:00, | NaN |
| 25-Nov-2016  | 18:00:00, | NaN |
| 25-Nov-2016  | 19:00:00, | NaN |
| 25-Nov-2016  | 20:00:00, | NaN |
| 25-Nov-2016  | 21:00:00, | NaN |
| 25-Nov-2016  | 22:00:00, | NaN |
| 25-Nov-2016  | 23:00:00, | NaN |
| 26-Nov-2016, |           | NaN |
| 26-Nov-2016  | 01:00:00, | NaN |
| 26-Nov-2016  | 02:00:00, | NaN |
| 26-Nov-2016  | 03:00:00, | NaN |
| 26-Nov-2016  | 04:00:00, | NaN |
| 26-Nov-2016  | 05:00:00, | NaN |
| 26-Nov-2016  | 06:00:00, | NaN |
| 26-Nov-2016  | 07:00:00, | NaN |
| 26-Nov-2016  | 08:00:00, | NaN |
| 26-Nov-2016  | 09:00:00, | NaN |
| 26-Nov-2016  | 10:00:00, | NaN |
| 26-Nov-2016  | 11:00:00, | NaN |
| 26-Nov-2016  | 12:00:00, | NaN |
| 26-Nov-2016  | 13:00:00, | NaN |
| 26-Nov-2016  | 14:00:00, | NaN |
| 26-Nov-2016  | 15:00:00, | NaN |
| 26-Nov-2016  | 16:00:00, | NaN |
| 26-Nov-2016  | 17:00:00, | NaN |
| 26-Nov-2016  | 18:00:00, | NaN |
| 26-Nov-2016  | 19:00:00, | NaN |
| 26-Nov-2016  | 20:00:00, | NaN |
| 26-Nov-2016  | 21:00:00, | NaN |
| 26-Nov-2016  | 22:00:00, | NaN |
| 26-Nov-2016  | 23:00:00, | NaN |
| 27-Nov-2016, |           | NaN |
| 27-Nov-2016  | 01:00:00, | NaN |
| 27-Nov-2016  | 02:00:00, | NaN |
| 27-Nov-2016  | 03:00:00, | NaN |
| 27-Nov-2016  | 04:00:00, | NaN |
| 27-Nov-2016  | 05:00:00, | NaN |
| 27-Nov-2016  | 06:00:00, | NaN |
| 27-Nov-2016  | 07:00:00, | NaN |
| 27-Nov-2016  | 08:00:00, | NaN |
| 27-Nov-2016  | 09:00:00, | NaN |
| 27-Nov-2016  | 10:00:00, | NaN |
| 27-Nov-2016  | 11:00:00, | NaN |
| 27-Nov-2016  | 12:00:00, | NaN |
| 27-Nov-2016  | 13:00:00, | NaN |
| 27-Nov-2016  | 14:00:00, | NaN |
| 27-Nov-2016  | 15:00:00, | NaN |
| 27-Nov-2016  | 16:00:00, | NaN |
| 27-Nov-2016  | 17:00:00, | NaN |
| 27-Nov-2016  | 18:00:00, | NaN |
| 27-Nov-2016  | 19:00:00, | NaN |
| 27-Nov-2016  | 20:00:00, | NaN |
| 27-Nov-2016  | 21:00:00, | NaN |
| 27-Nov-2016  | 22:00:00, | NaN |
| 27-Nov-2016  | 23:00:00, | NaN |
| 28-Nov-2016, |           | NaN |
| 28-Nov-2016  | 01:00:00, | NaN |

|              |           |     |
|--------------|-----------|-----|
| 28-Nov-2016  | 02:00:00, | NaN |
| 28-Nov-2016  | 03:00:00, | NaN |
| 28-Nov-2016  | 04:00:00, | NaN |
| 28-Nov-2016  | 05:00:00, | NaN |
| 28-Nov-2016  | 06:00:00, | NaN |
| 28-Nov-2016  | 07:00:00, | NaN |
| 28-Nov-2016  | 08:00:00, | NaN |
| 28-Nov-2016  | 09:00:00, | NaN |
| 28-Nov-2016  | 10:00:00, | NaN |
| 28-Nov-2016  | 11:00:00, | NaN |
| 28-Nov-2016  | 12:00:00, | NaN |
| 28-Nov-2016  | 13:00:00, | NaN |
| 28-Nov-2016  | 14:00:00, | NaN |
| 28-Nov-2016  | 15:00:00, | NaN |
| 28-Nov-2016  | 16:00:00, | NaN |
| 28-Nov-2016  | 17:00:00, | NaN |
| 28-Nov-2016  | 18:00:00, | NaN |
| 28-Nov-2016  | 19:00:00, | NaN |
| 28-Nov-2016  | 20:00:00, | NaN |
| 28-Nov-2016  | 21:00:00, | NaN |
| 28-Nov-2016  | 22:00:00, | NaN |
| 28-Nov-2016  | 23:00:00, | NaN |
| 29-Nov-2016, | NaN       |     |
| 29-Nov-2016  | 01:00:00, | NaN |
| 29-Nov-2016  | 02:00:00, | NaN |
| 29-Nov-2016  | 03:00:00, | NaN |
| 29-Nov-2016  | 04:00:00, | NaN |
| 29-Nov-2016  | 05:00:00, | NaN |
| 29-Nov-2016  | 06:00:00, | NaN |
| 29-Nov-2016  | 07:00:00, | NaN |
| 29-Nov-2016  | 08:00:00, | NaN |
| 29-Nov-2016  | 09:00:00, | NaN |
| 29-Nov-2016  | 10:00:00, | NaN |
| 29-Nov-2016  | 11:00:00, | NaN |
| 29-Nov-2016  | 12:00:00, | NaN |
| 29-Nov-2016  | 13:00:00, | NaN |
| 29-Nov-2016  | 14:00:00, | NaN |
| 29-Nov-2016  | 15:00:00, | NaN |
| 29-Nov-2016  | 16:00:00, | NaN |
| 29-Nov-2016  | 17:00:00, | NaN |
| 29-Nov-2016  | 18:00:00, | NaN |
| 29-Nov-2016  | 19:00:00, | NaN |
| 29-Nov-2016  | 20:00:00, | NaN |
| 29-Nov-2016  | 21:00:00, | NaN |
| 29-Nov-2016  | 22:00:00, | NaN |
| 29-Nov-2016  | 23:00:00, | NaN |
| 30-Nov-2016, | NaN       |     |
| 30-Nov-2016  | 01:00:00, | NaN |
| 30-Nov-2016  | 02:00:00, | NaN |
| 30-Nov-2016  | 03:00:00, | NaN |
| 30-Nov-2016  | 04:00:00, | NaN |
| 30-Nov-2016  | 05:00:00, | NaN |
| 30-Nov-2016  | 06:00:00, | NaN |
| 30-Nov-2016  | 07:00:00, | NaN |
| 30-Nov-2016  | 08:00:00, | NaN |
| 30-Nov-2016  | 09:00:00, | NaN |
| 30-Nov-2016  | 10:00:00, | NaN |
| 30-Nov-2016  | 11:00:00, | NaN |
| 30-Nov-2016  | 12:00:00, | NaN |
| 30-Nov-2016  | 13:00:00, | NaN |
| 30-Nov-2016  | 14:00:00, | NaN |
| 30-Nov-2016  | 15:00:00, | NaN |
| 30-Nov-2016  | 16:00:00, | NaN |
| 30-Nov-2016  | 17:00:00, | NaN |

|              |           |     |
|--------------|-----------|-----|
| 30-Nov-2016  | 18:00:00, | NaN |
| 30-Nov-2016  | 19:00:00, | NaN |
| 30-Nov-2016  | 20:00:00, | NaN |
| 30-Nov-2016  | 21:00:00, | NaN |
| 30-Nov-2016  | 22:00:00, | NaN |
| 30-Nov-2016  | 23:00:00, | NaN |
| 01-Dec-2016, | NaN       |     |
| 01-Dec-2016  | 01:00:00, | NaN |
| 01-Dec-2016  | 02:00:00, | NaN |
| 01-Dec-2016  | 03:00:00, | NaN |
| 01-Dec-2016  | 04:00:00, | NaN |
| 01-Dec-2016  | 05:00:00, | NaN |
| 01-Dec-2016  | 06:00:00, | NaN |
| 01-Dec-2016  | 07:00:00, | NaN |
| 01-Dec-2016  | 08:00:00, | NaN |
| 01-Dec-2016  | 09:00:00, | NaN |
| 01-Dec-2016  | 10:00:00, | NaN |
| 01-Dec-2016  | 11:00:00, | NaN |
| 01-Dec-2016  | 12:00:00, | NaN |
| 01-Dec-2016  | 13:00:00, | NaN |
| 01-Dec-2016  | 14:00:00, | NaN |
| 01-Dec-2016  | 15:00:00, | NaN |
| 01-Dec-2016  | 16:00:00, | NaN |
| 01-Dec-2016  | 17:00:00, | NaN |
| 01-Dec-2016  | 18:00:00, | NaN |
| 01-Dec-2016  | 19:00:00, | NaN |
| 01-Dec-2016  | 20:00:00, | NaN |
| 01-Dec-2016  | 21:00:00, | NaN |
| 01-Dec-2016  | 22:00:00, | NaN |
| 01-Dec-2016  | 23:00:00, | NaN |
| 02-Dec-2016, | NaN       |     |
| 02-Dec-2016  | 01:00:00, | NaN |
| 02-Dec-2016  | 02:00:00, | NaN |
| 02-Dec-2016  | 03:00:00, | NaN |
| 02-Dec-2016  | 04:00:00, | NaN |
| 02-Dec-2016  | 05:00:00, | NaN |
| 02-Dec-2016  | 06:00:00, | NaN |
| 02-Dec-2016  | 07:00:00, | NaN |
| 02-Dec-2016  | 08:00:00, | NaN |
| 02-Dec-2016  | 09:00:00, | NaN |
| 02-Dec-2016  | 10:00:00, | NaN |
| 02-Dec-2016  | 11:00:00, | NaN |
| 02-Dec-2016  | 12:00:00, | NaN |
| 02-Dec-2016  | 13:00:00, | NaN |
| 02-Dec-2016  | 14:00:00, | NaN |
| 02-Dec-2016  | 15:00:00, | NaN |
| 02-Dec-2016  | 16:00:00, | NaN |
| 02-Dec-2016  | 17:00:00, | NaN |
| 02-Dec-2016  | 18:00:00, | NaN |
| 02-Dec-2016  | 19:00:00, | NaN |
| 02-Dec-2016  | 20:00:00, | NaN |
| 02-Dec-2016  | 21:00:00, | NaN |
| 02-Dec-2016  | 22:00:00, | NaN |
| 02-Dec-2016  | 23:00:00, | NaN |
| 03-Dec-2016, | NaN       |     |
| 03-Dec-2016  | 01:00:00, | NaN |
| 03-Dec-2016  | 02:00:00, | NaN |
| 03-Dec-2016  | 03:00:00, | NaN |
| 03-Dec-2016  | 04:00:00, | NaN |
| 03-Dec-2016  | 05:00:00, | NaN |
| 03-Dec-2016  | 06:00:00, | NaN |
| 03-Dec-2016  | 07:00:00, | NaN |
| 03-Dec-2016  | 08:00:00, | NaN |
| 03-Dec-2016  | 09:00:00, | NaN |



03-Dec-2016 10:00:00, NaN  
03-Dec-2016 11:00:00, NaN  
03-Dec-2016 12:00:00, NaN  
03-Dec-2016 13:00:00, NaN  
03-Dec-2016 14:00:00, NaN  
03-Dec-2016 15:00:00, NaN  
03-Dec-2016 16:00:00, NaN  
03-Dec-2016 17:00:00, NaN  
03-Dec-2016 18:00:00, NaN  
03-Dec-2016 19:00:00, NaN  
03-Dec-2016 20:00:00, NaN  
03-Dec-2016 21:00:00, NaN  
03-Dec-2016 22:00:00, NaN  
03-Dec-2016 23:00:00, NaN  
04-Dec-2016, NaN  
04-Dec-2016 01:00:00, NaN  
04-Dec-2016 02:00:00, NaN  
04-Dec-2016 03:00:00, NaN  
04-Dec-2016 04:00:00, NaN  
04-Dec-2016 05:00:00, NaN  
04-Dec-2016 06:00:00, NaN  
04-Dec-2016 07:00:00, NaN  
04-Dec-2016 08:00:00, NaN  
04-Dec-2016 09:00:00, NaN  
04-Dec-2016 10:00:00, NaN  
04-Dec-2016 11:00:00, NaN  
04-Dec-2016 12:00:00, NaN  
04-Dec-2016 13:00:00, NaN  
04-Dec-2016 14:00:00, NaN  
04-Dec-2016 15:00:00, NaN  
04-Dec-2016 16:00:00, NaN  
04-Dec-2016 17:00:00, NaN  
04-Dec-2016 18:00:00, NaN  
04-Dec-2016 19:00:00, NaN  
04-Dec-2016 20:00:00, NaN  
04-Dec-2016 21:00:00, NaN  
04-Dec-2016 22:00:00, NaN  
04-Dec-2016 23:00:00, NaN  
05-Dec-2016, NaN  
05-Dec-2016 01:00:00, NaN  
05-Dec-2016 02:00:00, NaN  
05-Dec-2016 03:00:00, NaN  
05-Dec-2016 04:00:00, NaN  
05-Dec-2016 05:00:00, NaN  
05-Dec-2016 06:00:00, NaN  
05-Dec-2016 07:00:00, NaN  
05-Dec-2016 08:00:00, NaN  
05-Dec-2016 09:00:00, NaN  
05-Dec-2016 10:00:00, NaN  
05-Dec-2016 11:00:00, NaN  
05-Dec-2016 12:00:00, NaN  
05-Dec-2016 13:00:00, NaN  
05-Dec-2016 14:00:00, NaN  
05-Dec-2016 15:00:00, NaN  
05-Dec-2016 16:00:00, NaN  
05-Dec-2016 17:00:00, NaN  
05-Dec-2016 18:00:00, NaN  
05-Dec-2016 19:00:00, NaN  
05-Dec-2016 20:00:00, NaN  
05-Dec-2016 21:00:00, NaN  
05-Dec-2016 22:00:00, NaN  
05-Dec-2016 23:00:00, NaN  
06-Dec-2016, NaN  
06-Dec-2016 01:00:00, NaN

06-Dec-2016 02:00:00, NaN  
06-Dec-2016 03:00:00, NaN  
06-Dec-2016 04:00:00, NaN  
06-Dec-2016 05:00:00, NaN  
06-Dec-2016 06:00:00, NaN  
06-Dec-2016 07:00:00, NaN  
06-Dec-2016 08:00:00, NaN  
06-Dec-2016 09:00:00, NaN  
06-Dec-2016 10:00:00, NaN  
06-Dec-2016 11:00:00, NaN  
06-Dec-2016 12:00:00, NaN  
06-Dec-2016 13:00:00, NaN  
06-Dec-2016 14:00:00, NaN  
06-Dec-2016 15:00:00, NaN  
06-Dec-2016 16:00:00, NaN  
06-Dec-2016 17:00:00, NaN  
06-Dec-2016 18:00:00, NaN  
06-Dec-2016 19:00:00, NaN  
06-Dec-2016 20:00:00, NaN  
06-Dec-2016 21:00:00, NaN  
06-Dec-2016 22:00:00, NaN  
06-Dec-2016 23:00:00, NaN  
07-Dec-2016, NaN  
07-Dec-2016 01:00:00, NaN  
07-Dec-2016 02:00:00, NaN  
07-Dec-2016 03:00:00, NaN  
07-Dec-2016 04:00:00, NaN  
07-Dec-2016 05:00:00, NaN  
07-Dec-2016 06:00:00, NaN  
07-Dec-2016 07:00:00, NaN  
07-Dec-2016 08:00:00, NaN  
07-Dec-2016 09:00:00, NaN  
07-Dec-2016 10:00:00, NaN  
07-Dec-2016 11:00:00, NaN  
07-Dec-2016 12:00:00, NaN  
07-Dec-2016 13:00:00, NaN  
07-Dec-2016 14:00:00, NaN  
07-Dec-2016 15:00:00, NaN  
07-Dec-2016 16:00:00, NaN  
07-Dec-2016 17:00:00, NaN  
07-Dec-2016 18:00:00, NaN  
07-Dec-2016 19:00:00, NaN  
07-Dec-2016 20:00:00, NaN  
07-Dec-2016 21:00:00, NaN  
07-Dec-2016 22:00:00, NaN  
07-Dec-2016 23:00:00, NaN  
08-Dec-2016, NaN  
08-Dec-2016 01:00:00, NaN  
08-Dec-2016 02:00:00, NaN  
08-Dec-2016 03:00:00, NaN  
08-Dec-2016 04:00:00, NaN  
08-Dec-2016 05:00:00, NaN  
08-Dec-2016 06:00:00, NaN  
08-Dec-2016 07:00:00, NaN  
08-Dec-2016 08:00:00, NaN  
08-Dec-2016 09:00:00, NaN  
08-Dec-2016 10:00:00, NaN  
08-Dec-2016 11:00:00, NaN  
08-Dec-2016 12:00:00, NaN  
08-Dec-2016 13:00:00, NaN  
08-Dec-2016 14:00:00, NaN  
08-Dec-2016 15:00:00, NaN  
08-Dec-2016 16:00:00, NaN  
08-Dec-2016 17:00:00, NaN

08-Dec-2016 18:00:00, NaN  
08-Dec-2016 19:00:00, NaN  
08-Dec-2016 20:00:00, NaN  
08-Dec-2016 21:00:00, NaN  
08-Dec-2016 22:00:00, NaN  
08-Dec-2016 23:00:00, NaN  
09-Dec-2016, NaN  
09-Dec-2016 01:00:00, NaN  
09-Dec-2016 02:00:00, NaN  
09-Dec-2016 03:00:00, NaN  
09-Dec-2016 04:00:00, NaN  
09-Dec-2016 05:00:00, NaN  
09-Dec-2016 06:00:00, NaN  
09-Dec-2016 07:00:00, NaN  
09-Dec-2016 08:00:00, NaN  
09-Dec-2016 09:00:00, NaN  
09-Dec-2016 10:00:00, NaN  
09-Dec-2016 11:00:00, NaN  
09-Dec-2016 12:00:00, NaN  
09-Dec-2016 13:00:00, NaN  
09-Dec-2016 14:00:00, NaN  
09-Dec-2016 15:00:00, NaN  
09-Dec-2016 16:00:00, NaN  
09-Dec-2016 17:00:00, NaN  
09-Dec-2016 18:00:00, NaN  
09-Dec-2016 19:00:00, NaN  
09-Dec-2016 20:00:00, NaN  
09-Dec-2016 21:00:00, NaN  
09-Dec-2016 22:00:00, NaN  
09-Dec-2016 23:00:00, NaN  
10-Dec-2016, NaN  
10-Dec-2016 01:00:00, NaN  
10-Dec-2016 02:00:00, NaN  
10-Dec-2016 03:00:00, NaN  
10-Dec-2016 04:00:00, NaN  
10-Dec-2016 05:00:00, NaN  
10-Dec-2016 06:00:00, NaN  
10-Dec-2016 07:00:00, NaN  
10-Dec-2016 08:00:00, NaN  
10-Dec-2016 09:00:00, NaN  
10-Dec-2016 10:00:00, NaN  
10-Dec-2016 11:00:00, NaN  
10-Dec-2016 12:00:00, NaN  
10-Dec-2016 13:00:00, NaN  
10-Dec-2016 14:00:00, NaN  
10-Dec-2016 15:00:00, NaN  
10-Dec-2016 16:00:00, NaN  
10-Dec-2016 17:00:00, NaN  
10-Dec-2016 18:00:00, NaN  
10-Dec-2016 19:00:00, NaN  
10-Dec-2016 20:00:00, NaN  
10-Dec-2016 21:00:00, NaN  
10-Dec-2016 22:00:00, NaN  
10-Dec-2016 23:00:00, NaN  
11-Dec-2016, NaN  
11-Dec-2016 01:00:00, NaN  
11-Dec-2016 02:00:00, NaN  
11-Dec-2016 03:00:00, NaN  
11-Dec-2016 04:00:00, NaN  
11-Dec-2016 05:00:00, NaN  
11-Dec-2016 06:00:00, NaN  
11-Dec-2016 07:00:00, NaN  
11-Dec-2016 08:00:00, NaN  
11-Dec-2016 09:00:00, NaN

11-Dec-2016 10:00:00, NaN  
11-Dec-2016 11:00:00, NaN  
11-Dec-2016 12:00:00, NaN  
11-Dec-2016 13:00:00, NaN  
11-Dec-2016 14:00:00, NaN  
11-Dec-2016 15:00:00, NaN  
11-Dec-2016 16:00:00, NaN  
11-Dec-2016 17:00:00, NaN  
11-Dec-2016 18:00:00, NaN  
11-Dec-2016 19:00:00, NaN  
11-Dec-2016 20:00:00, NaN  
11-Dec-2016 21:00:00, NaN  
11-Dec-2016 22:00:00, NaN  
11-Dec-2016 23:00:00, NaN  
12-Dec-2016, NaN  
12-Dec-2016 01:00:00, NaN  
12-Dec-2016 02:00:00, NaN  
12-Dec-2016 03:00:00, NaN  
12-Dec-2016 04:00:00, NaN  
12-Dec-2016 05:00:00, NaN  
12-Dec-2016 06:00:00, NaN  
12-Dec-2016 07:00:00, NaN  
12-Dec-2016 08:00:00, NaN  
12-Dec-2016 09:00:00, NaN  
12-Dec-2016 10:00:00, NaN  
12-Dec-2016 11:00:00, NaN  
12-Dec-2016 12:00:00, NaN  
12-Dec-2016 13:00:00, NaN  
12-Dec-2016 14:00:00, NaN  
12-Dec-2016 15:00:00, NaN  
12-Dec-2016 16:00:00, NaN  
12-Dec-2016 17:00:00, NaN  
12-Dec-2016 18:00:00, NaN  
12-Dec-2016 19:00:00, NaN  
12-Dec-2016 20:00:00, NaN  
12-Dec-2016 21:00:00, NaN  
12-Dec-2016 22:00:00, NaN  
12-Dec-2016 23:00:00, NaN  
13-Dec-2016, NaN  
13-Dec-2016 01:00:00, NaN  
13-Dec-2016 02:00:00, NaN  
13-Dec-2016 03:00:00, NaN  
13-Dec-2016 04:00:00, NaN  
13-Dec-2016 05:00:00, NaN  
13-Dec-2016 06:00:00, NaN  
13-Dec-2016 07:00:00, NaN  
13-Dec-2016 08:00:00, NaN  
13-Dec-2016 09:00:00, NaN  
13-Dec-2016 10:00:00, NaN  
13-Dec-2016 11:00:00, NaN  
13-Dec-2016 12:00:00, NaN  
13-Dec-2016 13:00:00, NaN  
13-Dec-2016 14:00:00, NaN  
13-Dec-2016 15:00:00, NaN  
13-Dec-2016 16:00:00, NaN  
13-Dec-2016 17:00:00, NaN  
13-Dec-2016 18:00:00, NaN  
13-Dec-2016 19:00:00, NaN  
13-Dec-2016 20:00:00, NaN  
13-Dec-2016 21:00:00, NaN  
13-Dec-2016 22:00:00, NaN  
13-Dec-2016 23:00:00, NaN  
14-Dec-2016, NaN  
14-Dec-2016 01:00:00, NaN

14-Dec-2016 02:00:00, NaN  
14-Dec-2016 03:00:00, NaN  
14-Dec-2016 04:00:00, NaN  
14-Dec-2016 05:00:00, NaN  
14-Dec-2016 06:00:00, NaN  
14-Dec-2016 07:00:00, NaN  
14-Dec-2016 08:00:00, NaN  
14-Dec-2016 09:00:00, NaN  
14-Dec-2016 10:00:00, NaN  
14-Dec-2016 11:00:00, NaN  
14-Dec-2016 12:00:00, NaN  
14-Dec-2016 13:00:00, NaN  
14-Dec-2016 14:00:00, NaN  
14-Dec-2016 15:00:00, NaN  
14-Dec-2016 16:00:00, NaN  
14-Dec-2016 17:00:00, NaN  
14-Dec-2016 18:00:00, NaN  
14-Dec-2016 19:00:00, NaN  
14-Dec-2016 20:00:00, NaN  
14-Dec-2016 21:00:00, NaN  
14-Dec-2016 22:00:00, NaN  
14-Dec-2016 23:00:00, NaN  
15-Dec-2016, NaN  
15-Dec-2016 01:00:00, NaN  
15-Dec-2016 02:00:00, NaN  
15-Dec-2016 03:00:00, NaN  
15-Dec-2016 04:00:00, NaN  
15-Dec-2016 05:00:00, NaN  
15-Dec-2016 06:00:00, NaN  
15-Dec-2016 07:00:00, NaN  
15-Dec-2016 08:00:00, NaN  
15-Dec-2016 09:00:00, NaN  
15-Dec-2016 10:00:00, NaN  
15-Dec-2016 11:00:00, NaN  
15-Dec-2016 12:00:00, NaN  
15-Dec-2016 13:00:00, NaN  
15-Dec-2016 14:00:00, NaN  
15-Dec-2016 15:00:00, NaN  
15-Dec-2016 16:00:00, NaN  
15-Dec-2016 17:00:00, NaN  
15-Dec-2016 18:00:00, NaN  
15-Dec-2016 19:00:00, NaN  
15-Dec-2016 20:00:00, NaN  
15-Dec-2016 21:00:00, NaN  
15-Dec-2016 22:00:00, NaN  
15-Dec-2016 23:00:00, NaN  
16-Dec-2016, NaN  
16-Dec-2016 01:00:00, NaN  
16-Dec-2016 02:00:00, NaN  
16-Dec-2016 03:00:00, NaN  
16-Dec-2016 04:00:00, NaN  
16-Dec-2016 05:00:00, NaN  
16-Dec-2016 06:00:00, NaN  
16-Dec-2016 07:00:00, NaN  
16-Dec-2016 08:00:00, NaN  
16-Dec-2016 09:00:00, NaN  
16-Dec-2016 10:00:00, NaN  
16-Dec-2016 11:00:00, NaN  
16-Dec-2016 12:00:00, NaN  
16-Dec-2016 13:00:00, NaN  
16-Dec-2016 14:00:00, NaN  
16-Dec-2016 15:00:00, NaN  
16-Dec-2016 16:00:00, NaN  
16-Dec-2016 17:00:00, NaN

16-Dec-2016 18:00:00, NaN  
16-Dec-2016 19:00:00, NaN  
16-Dec-2016 20:00:00, NaN  
16-Dec-2016 21:00:00, NaN  
16-Dec-2016 22:00:00, NaN  
16-Dec-2016 23:00:00, NaN  
17-Dec-2016, NaN  
17-Dec-2016 01:00:00, NaN  
17-Dec-2016 02:00:00, NaN  
17-Dec-2016 03:00:00, NaN  
17-Dec-2016 04:00:00, NaN  
17-Dec-2016 05:00:00, NaN  
17-Dec-2016 06:00:00, NaN  
17-Dec-2016 07:00:00, NaN  
17-Dec-2016 08:00:00, NaN  
17-Dec-2016 09:00:00, NaN  
17-Dec-2016 10:00:00, NaN  
17-Dec-2016 11:00:00, NaN  
17-Dec-2016 12:00:00, NaN  
17-Dec-2016 13:00:00, NaN  
17-Dec-2016 14:00:00, NaN  
17-Dec-2016 15:00:00, NaN  
17-Dec-2016 16:00:00, NaN  
17-Dec-2016 17:00:00, NaN  
17-Dec-2016 18:00:00, NaN  
17-Dec-2016 19:00:00, NaN  
17-Dec-2016 20:00:00, NaN  
17-Dec-2016 21:00:00, NaN  
17-Dec-2016 22:00:00, NaN  
17-Dec-2016 23:00:00, NaN  
18-Dec-2016, NaN  
18-Dec-2016 01:00:00, NaN  
18-Dec-2016 02:00:00, NaN  
18-Dec-2016 03:00:00, NaN  
18-Dec-2016 04:00:00, NaN  
18-Dec-2016 05:00:00, NaN  
18-Dec-2016 06:00:00, NaN  
18-Dec-2016 07:00:00, NaN  
18-Dec-2016 08:00:00, NaN  
18-Dec-2016 09:00:00, NaN  
18-Dec-2016 10:00:00, NaN  
18-Dec-2016 11:00:00, NaN  
18-Dec-2016 12:00:00, NaN  
18-Dec-2016 13:00:00, NaN  
18-Dec-2016 14:00:00, NaN  
18-Dec-2016 15:00:00, NaN  
18-Dec-2016 16:00:00, NaN  
18-Dec-2016 17:00:00, NaN  
18-Dec-2016 18:00:00, NaN  
18-Dec-2016 19:00:00, NaN  
18-Dec-2016 20:00:00, NaN  
18-Dec-2016 21:00:00, NaN  
18-Dec-2016 22:00:00, NaN  
18-Dec-2016 23:00:00, NaN  
19-Dec-2016, NaN  
19-Dec-2016 01:00:00, NaN  
19-Dec-2016 02:00:00, NaN  
19-Dec-2016 03:00:00, NaN  
19-Dec-2016 04:00:00, NaN  
19-Dec-2016 05:00:00, NaN  
19-Dec-2016 06:00:00, NaN  
19-Dec-2016 07:00:00, NaN  
19-Dec-2016 08:00:00, NaN  
19-Dec-2016 09:00:00, NaN

19-Dec-2016 10:00:00, NaN  
19-Dec-2016 11:00:00, NaN  
19-Dec-2016 12:00:00, NaN  
19-Dec-2016 13:00:00, NaN  
19-Dec-2016 14:00:00, NaN  
19-Dec-2016 15:00:00, NaN  
19-Dec-2016 16:00:00, NaN  
19-Dec-2016 17:00:00, NaN  
19-Dec-2016 18:00:00, NaN  
19-Dec-2016 19:00:00, NaN  
19-Dec-2016 20:00:00, NaN  
19-Dec-2016 21:00:00, NaN  
19-Dec-2016 22:00:00, NaN  
19-Dec-2016 23:00:00, NaN  
20-Dec-2016, NaN  
20-Dec-2016 01:00:00, NaN  
20-Dec-2016 02:00:00, NaN  
20-Dec-2016 03:00:00, NaN  
20-Dec-2016 04:00:00, NaN  
20-Dec-2016 05:00:00, NaN  
20-Dec-2016 06:00:00, NaN  
20-Dec-2016 07:00:00, NaN  
20-Dec-2016 08:00:00, NaN  
20-Dec-2016 09:00:00, NaN  
20-Dec-2016 10:00:00, NaN  
20-Dec-2016 11:00:00, NaN  
20-Dec-2016 12:00:00, NaN  
20-Dec-2016 13:00:00, NaN  
20-Dec-2016 14:00:00, NaN  
20-Dec-2016 15:00:00, NaN  
20-Dec-2016 16:00:00, NaN  
20-Dec-2016 17:00:00, NaN  
20-Dec-2016 18:00:00, NaN  
20-Dec-2016 19:00:00, NaN  
20-Dec-2016 20:00:00, NaN  
20-Dec-2016 21:00:00, NaN  
20-Dec-2016 22:00:00, NaN  
20-Dec-2016 23:00:00, NaN  
21-Dec-2016, NaN  
21-Dec-2016 01:00:00, NaN  
21-Dec-2016 02:00:00, NaN  
21-Dec-2016 03:00:00, NaN  
21-Dec-2016 04:00:00, NaN  
21-Dec-2016 05:00:00, NaN  
21-Dec-2016 06:00:00, NaN  
21-Dec-2016 07:00:00, NaN  
21-Dec-2016 08:00:00, NaN  
21-Dec-2016 09:00:00, NaN  
21-Dec-2016 10:00:00, NaN  
21-Dec-2016 11:00:00, NaN  
21-Dec-2016 12:00:00, NaN  
21-Dec-2016 13:00:00, NaN  
21-Dec-2016 14:00:00, NaN  
21-Dec-2016 15:00:00, NaN  
21-Dec-2016 16:00:00, NaN  
21-Dec-2016 17:00:00, NaN  
21-Dec-2016 18:00:00, NaN  
21-Dec-2016 19:00:00, NaN  
21-Dec-2016 20:00:00, NaN  
21-Dec-2016 21:00:00, NaN  
21-Dec-2016 22:00:00, NaN  
21-Dec-2016 23:00:00, NaN  
22-Dec-2016, NaN  
22-Dec-2016 01:00:00, NaN

22-Dec-2016 02:00:00, NaN  
22-Dec-2016 03:00:00, NaN  
22-Dec-2016 04:00:00, NaN  
22-Dec-2016 05:00:00, NaN  
22-Dec-2016 06:00:00, NaN  
22-Dec-2016 07:00:00, NaN  
22-Dec-2016 08:00:00, NaN  
22-Dec-2016 09:00:00, NaN  
22-Dec-2016 10:00:00, NaN  
22-Dec-2016 11:00:00, NaN  
22-Dec-2016 12:00:00, NaN  
22-Dec-2016 13:00:00, NaN  
22-Dec-2016 14:00:00, NaN  
22-Dec-2016 15:00:00, NaN  
22-Dec-2016 16:00:00, NaN  
22-Dec-2016 17:00:00, NaN  
22-Dec-2016 18:00:00, NaN  
22-Dec-2016 19:00:00, NaN  
22-Dec-2016 20:00:00, NaN  
22-Dec-2016 21:00:00, NaN  
22-Dec-2016 22:00:00, NaN  
22-Dec-2016 23:00:00, NaN  
23-Dec-2016, NaN  
23-Dec-2016 01:00:00, NaN  
23-Dec-2016 02:00:00, NaN  
23-Dec-2016 03:00:00, NaN  
23-Dec-2016 04:00:00, NaN  
23-Dec-2016 05:00:00, NaN  
23-Dec-2016 06:00:00, NaN  
23-Dec-2016 07:00:00, NaN  
23-Dec-2016 08:00:00, NaN  
23-Dec-2016 09:00:00, NaN  
23-Dec-2016 10:00:00, NaN  
23-Dec-2016 11:00:00, NaN  
23-Dec-2016 12:00:00, NaN  
23-Dec-2016 13:00:00, NaN  
23-Dec-2016 14:00:00, NaN  
23-Dec-2016 15:00:00, NaN  
23-Dec-2016 16:00:00, NaN  
23-Dec-2016 17:00:00, NaN  
23-Dec-2016 18:00:00, NaN  
23-Dec-2016 19:00:00, NaN  
23-Dec-2016 20:00:00, NaN  
23-Dec-2016 21:00:00, NaN  
23-Dec-2016 22:00:00, NaN  
23-Dec-2016 23:00:00, NaN  
24-Dec-2016, NaN  
24-Dec-2016 01:00:00, NaN  
24-Dec-2016 02:00:00, NaN  
24-Dec-2016 03:00:00, NaN  
24-Dec-2016 04:00:00, NaN  
24-Dec-2016 05:00:00, NaN  
24-Dec-2016 06:00:00, NaN  
24-Dec-2016 07:00:00, NaN  
24-Dec-2016 08:00:00, NaN  
24-Dec-2016 09:00:00, NaN  
24-Dec-2016 10:00:00, NaN  
24-Dec-2016 11:00:00, NaN  
24-Dec-2016 12:00:00, NaN  
24-Dec-2016 13:00:00, NaN  
24-Dec-2016 14:00:00, NaN  
24-Dec-2016 15:00:00, NaN  
24-Dec-2016 16:00:00, NaN  
24-Dec-2016 17:00:00, NaN



|              |           |     |
|--------------|-----------|-----|
| 24-Dec-2016  | 18:00:00, | NaN |
| 24-Dec-2016  | 19:00:00, | NaN |
| 24-Dec-2016  | 20:00:00, | NaN |
| 24-Dec-2016  | 21:00:00, | NaN |
| 24-Dec-2016  | 22:00:00, | NaN |
| 24-Dec-2016  | 23:00:00, | NaN |
| 25-Dec-2016, | NaN       |     |
| 25-Dec-2016  | 01:00:00, | NaN |
| 25-Dec-2016  | 02:00:00, | NaN |
| 25-Dec-2016  | 03:00:00, | NaN |
| 25-Dec-2016  | 04:00:00, | NaN |
| 25-Dec-2016  | 05:00:00, | NaN |
| 25-Dec-2016  | 06:00:00, | NaN |
| 25-Dec-2016  | 07:00:00, | NaN |
| 25-Dec-2016  | 08:00:00, | NaN |
| 25-Dec-2016  | 09:00:00, | NaN |
| 25-Dec-2016  | 10:00:00, | NaN |
| 25-Dec-2016  | 11:00:00, | NaN |
| 25-Dec-2016  | 12:00:00, | NaN |
| 25-Dec-2016  | 13:00:00, | NaN |
| 25-Dec-2016  | 14:00:00, | NaN |
| 25-Dec-2016  | 15:00:00, | NaN |
| 25-Dec-2016  | 16:00:00, | NaN |
| 25-Dec-2016  | 17:00:00, | NaN |
| 25-Dec-2016  | 18:00:00, | NaN |
| 25-Dec-2016  | 19:00:00, | NaN |
| 25-Dec-2016  | 20:00:00, | NaN |
| 25-Dec-2016  | 21:00:00, | NaN |
| 25-Dec-2016  | 22:00:00, | NaN |
| 25-Dec-2016  | 23:00:00, | NaN |
| 26-Dec-2016, | NaN       |     |
| 26-Dec-2016  | 01:00:00, | NaN |
| 26-Dec-2016  | 02:00:00, | NaN |
| 26-Dec-2016  | 03:00:00, | NaN |
| 26-Dec-2016  | 04:00:00, | NaN |
| 26-Dec-2016  | 05:00:00, | NaN |
| 26-Dec-2016  | 06:00:00, | NaN |
| 26-Dec-2016  | 07:00:00, | NaN |
| 26-Dec-2016  | 08:00:00, | NaN |
| 26-Dec-2016  | 09:00:00, | NaN |
| 26-Dec-2016  | 10:00:00, | NaN |
| 26-Dec-2016  | 11:00:00, | NaN |
| 26-Dec-2016  | 12:00:00, | NaN |
| 26-Dec-2016  | 13:00:00, | NaN |
| 26-Dec-2016  | 14:00:00, | NaN |
| 26-Dec-2016  | 15:00:00, | NaN |
| 26-Dec-2016  | 16:00:00, | NaN |
| 26-Dec-2016  | 17:00:00, | NaN |
| 26-Dec-2016  | 18:00:00, | NaN |
| 26-Dec-2016  | 19:00:00, | NaN |
| 26-Dec-2016  | 20:00:00, | NaN |
| 26-Dec-2016  | 21:00:00, | NaN |
| 26-Dec-2016  | 22:00:00, | NaN |
| 26-Dec-2016  | 23:00:00, | NaN |
| 27-Dec-2016, | NaN       |     |
| 27-Dec-2016  | 01:00:00, | NaN |
| 27-Dec-2016  | 02:00:00, | NaN |
| 27-Dec-2016  | 03:00:00, | NaN |
| 27-Dec-2016  | 04:00:00, | NaN |
| 27-Dec-2016  | 05:00:00, | NaN |
| 27-Dec-2016  | 06:00:00, | NaN |
| 27-Dec-2016  | 07:00:00, | NaN |
| 27-Dec-2016  | 08:00:00, | NaN |
| 27-Dec-2016  | 09:00:00, | NaN |

27-Dec-2016 10:00:00, NaN  
27-Dec-2016 11:00:00, NaN  
27-Dec-2016 12:00:00, NaN  
27-Dec-2016 13:00:00, NaN  
27-Dec-2016 14:00:00, NaN  
27-Dec-2016 15:00:00, NaN  
27-Dec-2016 16:00:00, NaN  
27-Dec-2016 17:00:00, NaN  
27-Dec-2016 18:00:00, NaN  
27-Dec-2016 19:00:00, NaN  
27-Dec-2016 20:00:00, NaN  
27-Dec-2016 21:00:00, NaN  
27-Dec-2016 22:00:00, NaN  
27-Dec-2016 23:00:00, NaN  
28-Dec-2016, NaN  
28-Dec-2016 01:00:00, NaN  
28-Dec-2016 02:00:00, NaN  
28-Dec-2016 03:00:00, NaN  
28-Dec-2016 04:00:00, NaN  
28-Dec-2016 05:00:00, NaN  
28-Dec-2016 06:00:00, NaN  
28-Dec-2016 07:00:00, NaN  
28-Dec-2016 08:00:00, NaN  
28-Dec-2016 09:00:00, NaN  
28-Dec-2016 10:00:00, NaN  
28-Dec-2016 11:00:00, NaN  
28-Dec-2016 12:00:00, NaN  
28-Dec-2016 13:00:00, NaN  
28-Dec-2016 14:00:00, NaN  
28-Dec-2016 15:00:00, NaN  
28-Dec-2016 16:00:00, NaN  
28-Dec-2016 17:00:00, NaN  
28-Dec-2016 18:00:00, NaN  
28-Dec-2016 19:00:00, NaN  
28-Dec-2016 20:00:00, NaN  
28-Dec-2016 21:00:00, NaN  
28-Dec-2016 22:00:00, NaN  
28-Dec-2016 23:00:00, NaN  
29-Dec-2016, NaN  
29-Dec-2016 01:00:00, NaN  
29-Dec-2016 02:00:00, NaN  
29-Dec-2016 03:00:00, NaN  
29-Dec-2016 04:00:00, NaN  
29-Dec-2016 05:00:00, NaN  
29-Dec-2016 06:00:00, NaN  
29-Dec-2016 07:00:00, NaN  
29-Dec-2016 08:00:00, NaN  
29-Dec-2016 09:00:00, NaN  
29-Dec-2016 10:00:00, NaN  
29-Dec-2016 11:00:00, NaN  
29-Dec-2016 12:00:00, NaN  
29-Dec-2016 13:00:00, NaN  
29-Dec-2016 14:00:00, NaN  
29-Dec-2016 15:00:00, NaN  
29-Dec-2016 16:00:00, NaN  
29-Dec-2016 17:00:00, NaN  
29-Dec-2016 18:00:00, NaN  
29-Dec-2016 19:00:00, NaN  
29-Dec-2016 20:00:00, NaN  
29-Dec-2016 21:00:00, NaN  
29-Dec-2016 22:00:00, NaN  
29-Dec-2016 23:00:00, NaN  
30-Dec-2016, NaN  
30-Dec-2016 01:00:00, NaN

|              |           |     |
|--------------|-----------|-----|
| 30-Dec-2016  | 02:00:00, | NaN |
| 30-Dec-2016  | 03:00:00, | NaN |
| 30-Dec-2016  | 04:00:00, | NaN |
| 30-Dec-2016  | 05:00:00, | NaN |
| 30-Dec-2016  | 06:00:00, | NaN |
| 30-Dec-2016  | 07:00:00, | NaN |
| 30-Dec-2016  | 08:00:00, | NaN |
| 30-Dec-2016  | 09:00:00, | NaN |
| 30-Dec-2016  | 10:00:00, | NaN |
| 30-Dec-2016  | 11:00:00, | NaN |
| 30-Dec-2016  | 12:00:00, | NaN |
| 30-Dec-2016  | 13:00:00, | NaN |
| 30-Dec-2016  | 14:00:00, | NaN |
| 30-Dec-2016  | 15:00:00, | NaN |
| 30-Dec-2016  | 16:00:00, | NaN |
| 30-Dec-2016  | 17:00:00, | NaN |
| 30-Dec-2016  | 18:00:00, | NaN |
| 30-Dec-2016  | 19:00:00, | NaN |
| 30-Dec-2016  | 20:00:00, | NaN |
| 30-Dec-2016  | 21:00:00, | NaN |
| 30-Dec-2016  | 22:00:00, | NaN |
| 30-Dec-2016  | 23:00:00, | NaN |
| 31-Dec-2016, | NaN       |     |
| 31-Dec-2016  | 01:00:00, | NaN |
| 31-Dec-2016  | 02:00:00, | NaN |
| 31-Dec-2016  | 03:00:00, | NaN |
| 31-Dec-2016  | 04:00:00, | NaN |
| 31-Dec-2016  | 05:00:00, | NaN |
| 31-Dec-2016  | 06:00:00, | NaN |
| 31-Dec-2016  | 07:00:00, | NaN |
| 31-Dec-2016  | 08:00:00, | NaN |
| 31-Dec-2016  | 09:00:00, | NaN |
| 31-Dec-2016  | 10:00:00, | NaN |
| 31-Dec-2016  | 11:00:00, | NaN |
| 31-Dec-2016  | 12:00:00, | NaN |
| 31-Dec-2016  | 13:00:00, | NaN |
| 31-Dec-2016  | 14:00:00, | NaN |
| 31-Dec-2016  | 15:00:00, | NaN |
| 31-Dec-2016  | 16:00:00, | NaN |
| 31-Dec-2016  | 17:00:00, | NaN |
| 31-Dec-2016  | 18:00:00, | NaN |
| 31-Dec-2016  | 19:00:00, | NaN |
| 31-Dec-2016  | 20:00:00, | NaN |
| 31-Dec-2016  | 21:00:00, | NaN |
| 31-Dec-2016  | 22:00:00, | NaN |
| 31-Dec-2016  | 23:00:00, | NaN |
| 01-Jan-2017, | NaN       |     |
| 01-Jan-2017  | 01:00:00, | NaN |
| 01-Jan-2017  | 02:00:00, | NaN |
| 01-Jan-2017  | 03:00:00, | NaN |
| 01-Jan-2017  | 04:00:00, | NaN |
| 01-Jan-2017  | 05:00:00, | NaN |
| 01-Jan-2017  | 06:00:00, | NaN |
| 01-Jan-2017  | 07:00:00, | NaN |
| 01-Jan-2017  | 08:00:00, | NaN |
| 01-Jan-2017  | 09:00:00, | NaN |
| 01-Jan-2017  | 10:00:00, | NaN |
| 01-Jan-2017  | 11:00:00, | NaN |
| 01-Jan-2017  | 12:00:00, | NaN |
| 01-Jan-2017  | 13:00:00, | NaN |
| 01-Jan-2017  | 14:00:00, | NaN |
| 01-Jan-2017  | 15:00:00, | NaN |
| 01-Jan-2017  | 16:00:00, | NaN |
| 01-Jan-2017  | 17:00:00, | NaN |

01-Jan-2017 18:00:00, NaN  
01-Jan-2017 19:00:00, NaN  
01-Jan-2017 20:00:00, NaN  
01-Jan-2017 21:00:00, NaN  
01-Jan-2017 22:00:00, NaN  
01-Jan-2017 23:00:00, NaN  
02-Jan-2017, NaN  
02-Jan-2017 01:00:00, NaN  
02-Jan-2017 02:00:00, NaN  
02-Jan-2017 03:00:00, NaN  
02-Jan-2017 04:00:00, NaN  
02-Jan-2017 05:00:00, NaN  
02-Jan-2017 06:00:00, NaN  
02-Jan-2017 07:00:00, NaN  
02-Jan-2017 08:00:00, NaN  
02-Jan-2017 09:00:00, NaN  
02-Jan-2017 10:00:00, NaN  
02-Jan-2017 11:00:00, NaN  
02-Jan-2017 12:00:00, NaN  
02-Jan-2017 13:00:00, NaN  
02-Jan-2017 14:00:00, NaN  
02-Jan-2017 15:00:00, NaN  
02-Jan-2017 16:00:00, NaN  
02-Jan-2017 17:00:00, NaN  
02-Jan-2017 18:00:00, NaN  
02-Jan-2017 19:00:00, NaN  
02-Jan-2017 20:00:00, NaN  
02-Jan-2017 21:00:00, NaN  
02-Jan-2017 22:00:00, NaN  
02-Jan-2017 23:00:00, NaN  
03-Jan-2017, NaN  
03-Jan-2017 01:00:00, NaN  
03-Jan-2017 02:00:00, NaN  
03-Jan-2017 03:00:00, NaN  
03-Jan-2017 04:00:00, NaN  
03-Jan-2017 05:00:00, NaN  
03-Jan-2017 06:00:00, NaN  
03-Jan-2017 07:00:00, NaN  
03-Jan-2017 08:00:00, NaN  
03-Jan-2017 09:00:00, NaN  
03-Jan-2017 10:00:00, NaN  
03-Jan-2017 11:00:00, NaN  
03-Jan-2017 12:00:00, NaN  
03-Jan-2017 13:00:00, NaN  
03-Jan-2017 14:00:00, NaN  
03-Jan-2017 15:00:00, NaN  
03-Jan-2017 16:00:00, NaN  
03-Jan-2017 17:00:00, NaN  
03-Jan-2017 18:00:00, NaN  
03-Jan-2017 19:00:00, NaN  
03-Jan-2017 20:00:00, NaN  
03-Jan-2017 21:00:00, NaN  
03-Jan-2017 22:00:00, NaN  
03-Jan-2017 23:00:00, NaN  
04-Jan-2017, NaN  
04-Jan-2017 01:00:00, NaN  
04-Jan-2017 02:00:00, NaN  
04-Jan-2017 03:00:00, NaN  
04-Jan-2017 04:00:00, NaN  
04-Jan-2017 05:00:00, NaN  
04-Jan-2017 06:00:00, NaN  
04-Jan-2017 07:00:00, NaN  
04-Jan-2017 08:00:00, NaN  
04-Jan-2017 09:00:00, NaN

04-Jan-2017 10:00:00, NaN  
04-Jan-2017 11:00:00, NaN  
04-Jan-2017 12:00:00, NaN  
04-Jan-2017 13:00:00, NaN  
04-Jan-2017 14:00:00, NaN  
04-Jan-2017 15:00:00, NaN  
04-Jan-2017 16:00:00, NaN  
04-Jan-2017 17:00:00, NaN  
04-Jan-2017 18:00:00, NaN  
04-Jan-2017 19:00:00, NaN  
04-Jan-2017 20:00:00, NaN  
04-Jan-2017 21:00:00, NaN  
04-Jan-2017 22:00:00, NaN  
04-Jan-2017 23:00:00, NaN  
05-Jan-2017, NaN  
05-Jan-2017 01:00:00, NaN  
05-Jan-2017 02:00:00, NaN  
05-Jan-2017 03:00:00, NaN  
05-Jan-2017 04:00:00, NaN  
05-Jan-2017 05:00:00, NaN  
05-Jan-2017 06:00:00, NaN  
05-Jan-2017 07:00:00, NaN  
05-Jan-2017 08:00:00, NaN  
05-Jan-2017 09:00:00, NaN  
05-Jan-2017 10:00:00, NaN  
05-Jan-2017 11:00:00, NaN  
05-Jan-2017 12:00:00, NaN  
05-Jan-2017 13:00:00, NaN  
05-Jan-2017 14:00:00, NaN  
05-Jan-2017 15:00:00, NaN  
05-Jan-2017 16:00:00, NaN  
05-Jan-2017 17:00:00, NaN  
05-Jan-2017 18:00:00, NaN  
05-Jan-2017 19:00:00, NaN  
05-Jan-2017 20:00:00, NaN  
05-Jan-2017 21:00:00, NaN  
05-Jan-2017 22:00:00, NaN  
05-Jan-2017 23:00:00, NaN  
06-Jan-2017, NaN  
06-Jan-2017 01:00:00, NaN  
06-Jan-2017 02:00:00, NaN  
06-Jan-2017 03:00:00, NaN  
06-Jan-2017 04:00:00, NaN  
06-Jan-2017 05:00:00, NaN  
06-Jan-2017 06:00:00, NaN  
06-Jan-2017 07:00:00, NaN  
06-Jan-2017 08:00:00, NaN  
06-Jan-2017 09:00:00, NaN  
06-Jan-2017 10:00:00, NaN  
06-Jan-2017 11:00:00, NaN  
06-Jan-2017 12:00:00, NaN  
06-Jan-2017 13:00:00, NaN  
06-Jan-2017 14:00:00, NaN  
06-Jan-2017 15:00:00, NaN  
06-Jan-2017 16:00:00, NaN  
06-Jan-2017 17:00:00, NaN  
06-Jan-2017 18:00:00, NaN  
06-Jan-2017 19:00:00, NaN  
06-Jan-2017 20:00:00, NaN  
06-Jan-2017 21:00:00, NaN  
06-Jan-2017 22:00:00, NaN  
06-Jan-2017 23:00:00, NaN  
07-Jan-2017, NaN  
07-Jan-2017 01:00:00, NaN

07-Jan-2017 02:00:00, NaN  
07-Jan-2017 03:00:00, NaN  
07-Jan-2017 04:00:00, NaN  
07-Jan-2017 05:00:00, NaN  
07-Jan-2017 06:00:00, NaN  
07-Jan-2017 07:00:00, NaN  
07-Jan-2017 08:00:00, NaN  
07-Jan-2017 09:00:00, NaN  
07-Jan-2017 10:00:00, NaN  
07-Jan-2017 11:00:00, NaN  
07-Jan-2017 12:00:00, NaN  
07-Jan-2017 13:00:00, NaN  
07-Jan-2017 14:00:00, NaN  
07-Jan-2017 15:00:00, NaN  
07-Jan-2017 16:00:00, NaN  
07-Jan-2017 17:00:00, NaN  
07-Jan-2017 18:00:00, NaN  
07-Jan-2017 19:00:00, NaN  
07-Jan-2017 20:00:00, NaN  
07-Jan-2017 21:00:00, NaN  
07-Jan-2017 22:00:00, NaN  
07-Jan-2017 23:00:00, NaN  
08-Jan-2017, NaN  
08-Jan-2017 01:00:00, NaN  
08-Jan-2017 02:00:00, NaN  
08-Jan-2017 03:00:00, NaN  
08-Jan-2017 04:00:00, NaN  
08-Jan-2017 05:00:00, NaN  
08-Jan-2017 06:00:00, NaN  
08-Jan-2017 07:00:00, NaN  
08-Jan-2017 08:00:00, NaN  
08-Jan-2017 09:00:00, NaN  
08-Jan-2017 10:00:00, NaN  
08-Jan-2017 11:00:00, NaN  
08-Jan-2017 12:00:00, NaN  
08-Jan-2017 13:00:00, NaN  
08-Jan-2017 14:00:00, NaN  
08-Jan-2017 15:00:00, NaN  
08-Jan-2017 16:00:00, NaN  
08-Jan-2017 17:00:00, NaN  
08-Jan-2017 18:00:00, NaN  
08-Jan-2017 19:00:00, NaN  
08-Jan-2017 20:00:00, NaN  
08-Jan-2017 21:00:00, NaN  
08-Jan-2017 22:00:00, NaN  
08-Jan-2017 23:00:00, NaN  
09-Jan-2017, NaN  
09-Jan-2017 01:00:00, NaN  
09-Jan-2017 02:00:00, NaN  
09-Jan-2017 03:00:00, NaN  
09-Jan-2017 04:00:00, NaN  
09-Jan-2017 05:00:00, NaN  
09-Jan-2017 06:00:00, NaN  
09-Jan-2017 07:00:00, NaN  
09-Jan-2017 08:00:00, NaN  
09-Jan-2017 09:00:00, NaN  
09-Jan-2017 10:00:00, NaN  
09-Jan-2017 11:00:00, NaN  
09-Jan-2017 12:00:00, NaN  
09-Jan-2017 13:00:00, NaN  
09-Jan-2017 14:00:00, NaN  
09-Jan-2017 15:00:00, NaN  
09-Jan-2017 16:00:00, NaN  
09-Jan-2017 17:00:00, NaN

|              |           |     |
|--------------|-----------|-----|
| 09-Jan-2017  | 18:00:00, | NaN |
| 09-Jan-2017  | 19:00:00, | NaN |
| 09-Jan-2017  | 20:00:00, | NaN |
| 09-Jan-2017  | 21:00:00, | NaN |
| 09-Jan-2017  | 22:00:00, | NaN |
| 09-Jan-2017  | 23:00:00, | NaN |
| 10-Jan-2017, | NaN       |     |
| 10-Jan-2017  | 01:00:00, | NaN |
| 10-Jan-2017  | 02:00:00, | NaN |
| 10-Jan-2017  | 03:00:00, | NaN |
| 10-Jan-2017  | 04:00:00, | NaN |
| 10-Jan-2017  | 05:00:00, | NaN |
| 10-Jan-2017  | 06:00:00, | NaN |
| 10-Jan-2017  | 07:00:00, | NaN |
| 10-Jan-2017  | 08:00:00, | NaN |
| 10-Jan-2017  | 09:00:00, | NaN |
| 10-Jan-2017  | 10:00:00, | NaN |
| 10-Jan-2017  | 11:00:00, | NaN |
| 10-Jan-2017  | 12:00:00, | NaN |
| 10-Jan-2017  | 13:00:00, | NaN |
| 10-Jan-2017  | 14:00:00, | NaN |
| 10-Jan-2017  | 15:00:00, | NaN |
| 10-Jan-2017  | 16:00:00, | NaN |
| 10-Jan-2017  | 17:00:00, | NaN |
| 10-Jan-2017  | 18:00:00, | NaN |
| 10-Jan-2017  | 19:00:00, | NaN |
| 10-Jan-2017  | 20:00:00, | NaN |
| 10-Jan-2017  | 21:00:00, | NaN |
| 10-Jan-2017  | 22:00:00, | NaN |
| 10-Jan-2017  | 23:00:00, | NaN |
| 11-Jan-2017, | NaN       |     |
| 11-Jan-2017  | 01:00:00, | NaN |
| 11-Jan-2017  | 02:00:00, | NaN |
| 11-Jan-2017  | 03:00:00, | NaN |
| 11-Jan-2017  | 04:00:00, | NaN |
| 11-Jan-2017  | 05:00:00, | NaN |
| 11-Jan-2017  | 06:00:00, | NaN |
| 11-Jan-2017  | 07:00:00, | NaN |
| 11-Jan-2017  | 08:00:00, | NaN |
| 11-Jan-2017  | 09:00:00, | NaN |
| 11-Jan-2017  | 10:00:00, | NaN |
| 11-Jan-2017  | 11:00:00, | NaN |
| 11-Jan-2017  | 12:00:00, | NaN |
| 11-Jan-2017  | 13:00:00, | NaN |
| 11-Jan-2017  | 14:00:00, | NaN |
| 11-Jan-2017  | 15:00:00, | NaN |
| 11-Jan-2017  | 16:00:00, | NaN |
| 11-Jan-2017  | 17:00:00, | NaN |
| 11-Jan-2017  | 18:00:00, | NaN |
| 11-Jan-2017  | 19:00:00, | NaN |
| 11-Jan-2017  | 20:00:00, | NaN |
| 11-Jan-2017  | 21:00:00, | NaN |
| 11-Jan-2017  | 22:00:00, | NaN |
| 11-Jan-2017  | 23:00:00, | NaN |
| 12-Jan-2017, | NaN       |     |
| 12-Jan-2017  | 01:00:00, | NaN |
| 12-Jan-2017  | 02:00:00, | NaN |
| 12-Jan-2017  | 03:00:00, | NaN |
| 12-Jan-2017  | 04:00:00, | NaN |
| 12-Jan-2017  | 05:00:00, | NaN |
| 12-Jan-2017  | 06:00:00, | NaN |
| 12-Jan-2017  | 07:00:00, | NaN |
| 12-Jan-2017  | 08:00:00, | NaN |
| 12-Jan-2017  | 09:00:00, | NaN |

12-Jan-2017 10:00:00, NaN  
12-Jan-2017 11:00:00, NaN  
12-Jan-2017 12:00:00, NaN  
12-Jan-2017 13:00:00, NaN  
12-Jan-2017 14:00:00, NaN  
12-Jan-2017 15:00:00, NaN  
12-Jan-2017 16:00:00, NaN  
12-Jan-2017 17:00:00, NaN  
12-Jan-2017 18:00:00, NaN  
12-Jan-2017 19:00:00, NaN  
12-Jan-2017 20:00:00, NaN  
12-Jan-2017 21:00:00, NaN  
12-Jan-2017 22:00:00, NaN  
12-Jan-2017 23:00:00, NaN  
13-Jan-2017, NaN  
13-Jan-2017 01:00:00, NaN  
13-Jan-2017 02:00:00, NaN  
13-Jan-2017 03:00:00, NaN  
13-Jan-2017 04:00:00, NaN  
13-Jan-2017 05:00:00, NaN  
13-Jan-2017 06:00:00, NaN  
13-Jan-2017 07:00:00, NaN  
13-Jan-2017 08:00:00, NaN  
13-Jan-2017 09:00:00, NaN  
13-Jan-2017 10:00:00, NaN  
13-Jan-2017 11:00:00, NaN  
13-Jan-2017 12:00:00, NaN  
13-Jan-2017 13:00:00, NaN  
13-Jan-2017 14:00:00, NaN  
13-Jan-2017 15:00:00, NaN  
13-Jan-2017 16:00:00, NaN  
13-Jan-2017 17:00:00, NaN  
13-Jan-2017 18:00:00, NaN  
13-Jan-2017 19:00:00, NaN  
13-Jan-2017 20:00:00, NaN  
13-Jan-2017 21:00:00, NaN  
13-Jan-2017 22:00:00, NaN  
13-Jan-2017 23:00:00, NaN  
14-Jan-2017, NaN  
14-Jan-2017 01:00:00, NaN  
14-Jan-2017 02:00:00, NaN  
14-Jan-2017 03:00:00, NaN  
14-Jan-2017 04:00:00, NaN  
14-Jan-2017 05:00:00, NaN  
14-Jan-2017 06:00:00, NaN  
14-Jan-2017 07:00:00, NaN  
14-Jan-2017 08:00:00, NaN  
14-Jan-2017 09:00:00, NaN  
14-Jan-2017 10:00:00, NaN  
14-Jan-2017 11:00:00, NaN  
14-Jan-2017 12:00:00, NaN  
14-Jan-2017 13:00:00, NaN  
14-Jan-2017 14:00:00, NaN  
14-Jan-2017 15:00:00, NaN  
14-Jan-2017 16:00:00, NaN  
14-Jan-2017 17:00:00, NaN  
14-Jan-2017 18:00:00, NaN  
14-Jan-2017 19:00:00, NaN  
14-Jan-2017 20:00:00, NaN  
14-Jan-2017 21:00:00, NaN  
14-Jan-2017 22:00:00, NaN  
14-Jan-2017 23:00:00, NaN  
15-Jan-2017, NaN  
15-Jan-2017 01:00:00, NaN



15-Jan-2017 02:00:00, NaN  
15-Jan-2017 03:00:00, NaN  
15-Jan-2017 04:00:00, NaN  
15-Jan-2017 05:00:00, NaN  
15-Jan-2017 06:00:00, NaN  
15-Jan-2017 07:00:00, NaN  
15-Jan-2017 08:00:00, NaN  
15-Jan-2017 09:00:00, NaN  
15-Jan-2017 10:00:00, NaN  
15-Jan-2017 11:00:00, NaN  
15-Jan-2017 12:00:00, NaN  
15-Jan-2017 13:00:00, NaN  
15-Jan-2017 14:00:00, NaN  
15-Jan-2017 15:00:00, NaN  
15-Jan-2017 16:00:00, NaN  
15-Jan-2017 17:00:00, NaN  
15-Jan-2017 18:00:00, NaN  
15-Jan-2017 19:00:00, NaN  
15-Jan-2017 20:00:00, NaN  
15-Jan-2017 21:00:00, NaN  
15-Jan-2017 22:00:00, NaN  
15-Jan-2017 23:00:00, NaN  
16-Jan-2017, NaN  
16-Jan-2017 01:00:00, NaN  
16-Jan-2017 02:00:00, NaN  
16-Jan-2017 03:00:00, NaN  
16-Jan-2017 04:00:00, NaN  
16-Jan-2017 05:00:00, NaN  
16-Jan-2017 06:00:00, NaN  
16-Jan-2017 07:00:00, NaN  
16-Jan-2017 08:00:00, NaN  
16-Jan-2017 09:00:00, NaN  
16-Jan-2017 10:00:00, NaN  
16-Jan-2017 11:00:00, NaN  
16-Jan-2017 12:00:00, NaN  
16-Jan-2017 13:00:00, NaN  
16-Jan-2017 14:00:00, NaN  
16-Jan-2017 15:00:00, NaN  
16-Jan-2017 16:00:00, NaN  
16-Jan-2017 17:00:00, NaN  
16-Jan-2017 18:00:00, NaN  
16-Jan-2017 19:00:00, NaN  
16-Jan-2017 20:00:00, NaN  
16-Jan-2017 21:00:00, NaN  
16-Jan-2017 22:00:00, NaN  
16-Jan-2017 23:00:00, NaN  
17-Jan-2017, NaN  
17-Jan-2017 01:00:00, NaN  
17-Jan-2017 02:00:00, NaN  
17-Jan-2017 03:00:00, NaN  
17-Jan-2017 04:00:00, NaN  
17-Jan-2017 05:00:00, NaN  
17-Jan-2017 06:00:00, NaN  
17-Jan-2017 07:00:00, NaN  
17-Jan-2017 08:00:00, NaN  
17-Jan-2017 09:00:00, NaN  
17-Jan-2017 10:00:00, NaN  
17-Jan-2017 11:00:00, NaN  
17-Jan-2017 12:00:00, NaN  
17-Jan-2017 13:00:00, NaN  
17-Jan-2017 14:00:00, NaN  
17-Jan-2017 15:00:00, NaN  
17-Jan-2017 16:00:00, NaN  
17-Jan-2017 17:00:00, NaN

17-Jan-2017 18:00:00, NaN  
17-Jan-2017 19:00:00, NaN  
17-Jan-2017 20:00:00, NaN  
17-Jan-2017 21:00:00, NaN  
17-Jan-2017 22:00:00, NaN  
17-Jan-2017 23:00:00, NaN  
18-Jan-2017, NaN  
18-Jan-2017 01:00:00, NaN  
18-Jan-2017 02:00:00, NaN  
18-Jan-2017 03:00:00, NaN  
18-Jan-2017 04:00:00, NaN  
18-Jan-2017 05:00:00, NaN  
18-Jan-2017 06:00:00, NaN  
18-Jan-2017 07:00:00, NaN  
18-Jan-2017 08:00:00, NaN  
18-Jan-2017 09:00:00, NaN  
18-Jan-2017 10:00:00, NaN  
18-Jan-2017 11:00:00, NaN  
18-Jan-2017 12:00:00, NaN  
18-Jan-2017 13:00:00, NaN  
18-Jan-2017 14:00:00, NaN  
18-Jan-2017 15:00:00, NaN  
18-Jan-2017 16:00:00, NaN  
18-Jan-2017 17:00:00, NaN  
18-Jan-2017 18:00:00, NaN  
18-Jan-2017 19:00:00, NaN  
18-Jan-2017 20:00:00, NaN  
18-Jan-2017 21:00:00, NaN  
18-Jan-2017 22:00:00, NaN  
18-Jan-2017 23:00:00, NaN  
19-Jan-2017, NaN  
19-Jan-2017 01:00:00, NaN  
19-Jan-2017 02:00:00, NaN  
19-Jan-2017 03:00:00, NaN  
19-Jan-2017 04:00:00, NaN  
19-Jan-2017 05:00:00, NaN  
19-Jan-2017 06:00:00, NaN  
19-Jan-2017 07:00:00, NaN  
19-Jan-2017 08:00:00, NaN  
19-Jan-2017 09:00:00, NaN  
19-Jan-2017 10:00:00, NaN  
19-Jan-2017 11:00:00, NaN  
19-Jan-2017 12:00:00, NaN  
19-Jan-2017 13:00:00, NaN  
19-Jan-2017 14:00:00, NaN  
19-Jan-2017 15:00:00, NaN  
19-Jan-2017 16:00:00, NaN  
19-Jan-2017 17:00:00, NaN  
19-Jan-2017 18:00:00, NaN  
19-Jan-2017 19:00:00, NaN  
19-Jan-2017 20:00:00, NaN  
19-Jan-2017 21:00:00, NaN  
19-Jan-2017 22:00:00, NaN  
19-Jan-2017 23:00:00, NaN  
20-Jan-2017, NaN  
20-Jan-2017 01:00:00, NaN  
20-Jan-2017 02:00:00, NaN  
20-Jan-2017 03:00:00, NaN  
20-Jan-2017 04:00:00, NaN  
20-Jan-2017 05:00:00, NaN  
20-Jan-2017 06:00:00, NaN  
20-Jan-2017 07:00:00, NaN  
20-Jan-2017 08:00:00, NaN  
20-Jan-2017 09:00:00, NaN

20-Jan-2017 10:00:00, NaN  
20-Jan-2017 11:00:00, NaN  
20-Jan-2017 12:00:00, NaN  
20-Jan-2017 13:00:00, NaN  
20-Jan-2017 14:00:00, NaN  
20-Jan-2017 15:00:00, NaN  
20-Jan-2017 16:00:00, NaN  
20-Jan-2017 17:00:00, NaN  
20-Jan-2017 18:00:00, NaN  
20-Jan-2017 19:00:00, NaN  
20-Jan-2017 20:00:00, NaN  
20-Jan-2017 21:00:00, NaN  
20-Jan-2017 22:00:00, NaN  
20-Jan-2017 23:00:00, NaN  
21-Jan-2017, NaN  
21-Jan-2017 01:00:00, NaN  
21-Jan-2017 02:00:00, NaN  
21-Jan-2017 03:00:00, NaN  
21-Jan-2017 04:00:00, NaN  
21-Jan-2017 05:00:00, NaN  
21-Jan-2017 06:00:00, NaN  
21-Jan-2017 07:00:00, NaN  
21-Jan-2017 08:00:00, NaN  
21-Jan-2017 09:00:00, NaN  
21-Jan-2017 10:00:00, NaN  
21-Jan-2017 11:00:00, NaN  
21-Jan-2017 12:00:00, NaN  
21-Jan-2017 13:00:00, NaN  
21-Jan-2017 14:00:00, NaN  
21-Jan-2017 15:00:00, NaN  
21-Jan-2017 16:00:00, NaN  
21-Jan-2017 17:00:00, NaN  
21-Jan-2017 18:00:00, NaN  
21-Jan-2017 19:00:00, NaN  
21-Jan-2017 20:00:00, NaN  
21-Jan-2017 21:00:00, NaN  
21-Jan-2017 22:00:00, NaN  
21-Jan-2017 23:00:00, NaN  
22-Jan-2017, NaN  
22-Jan-2017 01:00:00, NaN  
22-Jan-2017 02:00:00, NaN  
22-Jan-2017 03:00:00, NaN  
22-Jan-2017 04:00:00, NaN  
22-Jan-2017 05:00:00, NaN  
22-Jan-2017 06:00:00, NaN  
22-Jan-2017 07:00:00, NaN  
22-Jan-2017 08:00:00, NaN  
22-Jan-2017 09:00:00, NaN  
22-Jan-2017 10:00:00, NaN  
22-Jan-2017 11:00:00, NaN  
22-Jan-2017 12:00:00, NaN  
22-Jan-2017 13:00:00, NaN  
22-Jan-2017 14:00:00, NaN  
22-Jan-2017 15:00:00, NaN  
22-Jan-2017 16:00:00, NaN  
22-Jan-2017 17:00:00, NaN  
22-Jan-2017 18:00:00, NaN  
22-Jan-2017 19:00:00, NaN  
22-Jan-2017 20:00:00, NaN  
22-Jan-2017 21:00:00, NaN  
22-Jan-2017 22:00:00, NaN  
22-Jan-2017 23:00:00, NaN  
23-Jan-2017, NaN  
23-Jan-2017 01:00:00, NaN

|              |           |     |
|--------------|-----------|-----|
| 23-Jan-2017  | 02:00:00, | NaN |
| 23-Jan-2017  | 03:00:00, | NaN |
| 23-Jan-2017  | 04:00:00, | NaN |
| 23-Jan-2017  | 05:00:00, | NaN |
| 23-Jan-2017  | 06:00:00, | NaN |
| 23-Jan-2017  | 07:00:00, | NaN |
| 23-Jan-2017  | 08:00:00, | NaN |
| 23-Jan-2017  | 09:00:00, | NaN |
| 23-Jan-2017  | 10:00:00, | NaN |
| 23-Jan-2017  | 11:00:00, | NaN |
| 23-Jan-2017  | 12:00:00, | NaN |
| 23-Jan-2017  | 13:00:00, | NaN |
| 23-Jan-2017  | 14:00:00, | NaN |
| 23-Jan-2017  | 15:00:00, | NaN |
| 23-Jan-2017  | 16:00:00, | NaN |
| 23-Jan-2017  | 17:00:00, | NaN |
| 23-Jan-2017  | 18:00:00, | NaN |
| 23-Jan-2017  | 19:00:00, | NaN |
| 23-Jan-2017  | 20:00:00, | NaN |
| 23-Jan-2017  | 21:00:00, | NaN |
| 23-Jan-2017  | 22:00:00, | NaN |
| 23-Jan-2017  | 23:00:00, | NaN |
| 24-Jan-2017, | NaN       |     |
| 24-Jan-2017  | 01:00:00, | NaN |
| 24-Jan-2017  | 02:00:00, | NaN |
| 24-Jan-2017  | 03:00:00, | NaN |
| 24-Jan-2017  | 04:00:00, | NaN |
| 24-Jan-2017  | 05:00:00, | NaN |
| 24-Jan-2017  | 06:00:00, | NaN |
| 24-Jan-2017  | 07:00:00, | NaN |
| 24-Jan-2017  | 08:00:00, | NaN |
| 24-Jan-2017  | 09:00:00, | NaN |
| 24-Jan-2017  | 10:00:00, | NaN |
| 24-Jan-2017  | 11:00:00, | NaN |
| 24-Jan-2017  | 12:00:00, | NaN |
| 24-Jan-2017  | 13:00:00, | NaN |
| 24-Jan-2017  | 14:00:00, | NaN |
| 24-Jan-2017  | 15:00:00, | NaN |
| 24-Jan-2017  | 16:00:00, | NaN |
| 24-Jan-2017  | 17:00:00, | NaN |
| 24-Jan-2017  | 18:00:00, | NaN |
| 24-Jan-2017  | 19:00:00, | NaN |
| 24-Jan-2017  | 20:00:00, | NaN |
| 24-Jan-2017  | 21:00:00, | NaN |
| 24-Jan-2017  | 22:00:00, | NaN |
| 24-Jan-2017  | 23:00:00, | NaN |
| 25-Jan-2017, | NaN       |     |
| 25-Jan-2017  | 01:00:00, | NaN |
| 25-Jan-2017  | 02:00:00, | NaN |
| 25-Jan-2017  | 03:00:00, | NaN |
| 25-Jan-2017  | 04:00:00, | NaN |
| 25-Jan-2017  | 05:00:00, | NaN |
| 25-Jan-2017  | 06:00:00, | NaN |
| 25-Jan-2017  | 07:00:00, | NaN |
| 25-Jan-2017  | 08:00:00, | NaN |
| 25-Jan-2017  | 09:00:00, | NaN |
| 25-Jan-2017  | 10:00:00, | NaN |
| 25-Jan-2017  | 11:00:00, | NaN |
| 25-Jan-2017  | 12:00:00, | NaN |
| 25-Jan-2017  | 13:00:00, | NaN |
| 25-Jan-2017  | 14:00:00, | NaN |
| 25-Jan-2017  | 15:00:00, | NaN |
| 25-Jan-2017  | 16:00:00, | NaN |
| 25-Jan-2017  | 17:00:00, | NaN |

|              |           |     |
|--------------|-----------|-----|
| 25-Jan-2017  | 18:00:00, | NaN |
| 25-Jan-2017  | 19:00:00, | NaN |
| 25-Jan-2017  | 20:00:00, | NaN |
| 25-Jan-2017  | 21:00:00, | NaN |
| 25-Jan-2017  | 22:00:00, | NaN |
| 25-Jan-2017  | 23:00:00, | NaN |
| 26-Jan-2017, | NaN       |     |
| 26-Jan-2017  | 01:00:00, | NaN |
| 26-Jan-2017  | 02:00:00, | NaN |
| 26-Jan-2017  | 03:00:00, | NaN |
| 26-Jan-2017  | 04:00:00, | NaN |
| 26-Jan-2017  | 05:00:00, | NaN |
| 26-Jan-2017  | 06:00:00, | NaN |
| 26-Jan-2017  | 07:00:00, | NaN |
| 26-Jan-2017  | 08:00:00, | NaN |
| 26-Jan-2017  | 09:00:00, | NaN |
| 26-Jan-2017  | 10:00:00, | NaN |
| 26-Jan-2017  | 11:00:00, | NaN |
| 26-Jan-2017  | 12:00:00, | NaN |
| 26-Jan-2017  | 13:00:00, | NaN |
| 26-Jan-2017  | 14:00:00, | NaN |
| 26-Jan-2017  | 15:00:00, | NaN |
| 26-Jan-2017  | 16:00:00, | NaN |
| 26-Jan-2017  | 17:00:00, | NaN |
| 26-Jan-2017  | 18:00:00, | NaN |
| 26-Jan-2017  | 19:00:00, | NaN |
| 26-Jan-2017  | 20:00:00, | NaN |
| 26-Jan-2017  | 21:00:00, | NaN |
| 26-Jan-2017  | 22:00:00, | NaN |
| 26-Jan-2017  | 23:00:00, | NaN |
| 27-Jan-2017, | NaN       |     |
| 27-Jan-2017  | 01:00:00, | NaN |
| 27-Jan-2017  | 02:00:00, | NaN |
| 27-Jan-2017  | 03:00:00, | NaN |
| 27-Jan-2017  | 04:00:00, | NaN |
| 27-Jan-2017  | 05:00:00, | NaN |
| 27-Jan-2017  | 06:00:00, | NaN |
| 27-Jan-2017  | 07:00:00, | NaN |
| 27-Jan-2017  | 08:00:00, | NaN |
| 27-Jan-2017  | 09:00:00, | NaN |
| 27-Jan-2017  | 10:00:00, | NaN |
| 27-Jan-2017  | 11:00:00, | NaN |
| 27-Jan-2017  | 12:00:00, | NaN |
| 27-Jan-2017  | 13:00:00, | NaN |
| 27-Jan-2017  | 14:00:00, | NaN |
| 27-Jan-2017  | 15:00:00, | NaN |
| 27-Jan-2017  | 16:00:00, | NaN |
| 27-Jan-2017  | 17:00:00, | NaN |
| 27-Jan-2017  | 18:00:00, | NaN |
| 27-Jan-2017  | 19:00:00, | NaN |
| 27-Jan-2017  | 20:00:00, | NaN |
| 27-Jan-2017  | 21:00:00, | NaN |
| 27-Jan-2017  | 22:00:00, | NaN |
| 27-Jan-2017  | 23:00:00, | NaN |
| 28-Jan-2017, | NaN       |     |
| 28-Jan-2017  | 01:00:00, | NaN |
| 28-Jan-2017  | 02:00:00, | NaN |
| 28-Jan-2017  | 03:00:00, | NaN |
| 28-Jan-2017  | 04:00:00, | NaN |
| 28-Jan-2017  | 05:00:00, | NaN |
| 28-Jan-2017  | 06:00:00, | NaN |
| 28-Jan-2017  | 07:00:00, | NaN |
| 28-Jan-2017  | 08:00:00, | NaN |
| 28-Jan-2017  | 09:00:00, | NaN |

28-Jan-2017 10:00:00, NaN  
28-Jan-2017 11:00:00, NaN  
28-Jan-2017 12:00:00, NaN  
28-Jan-2017 13:00:00, NaN  
28-Jan-2017 14:00:00, NaN  
28-Jan-2017 15:00:00, NaN  
28-Jan-2017 16:00:00, NaN  
28-Jan-2017 17:00:00, NaN  
28-Jan-2017 18:00:00, NaN  
28-Jan-2017 19:00:00, NaN  
28-Jan-2017 20:00:00, NaN  
28-Jan-2017 21:00:00, NaN  
28-Jan-2017 22:00:00, NaN  
28-Jan-2017 23:00:00, NaN  
29-Jan-2017, NaN  
29-Jan-2017 01:00:00, NaN  
29-Jan-2017 02:00:00, NaN  
29-Jan-2017 03:00:00, NaN  
29-Jan-2017 04:00:00, NaN  
29-Jan-2017 05:00:00, NaN  
29-Jan-2017 06:00:00, NaN  
29-Jan-2017 07:00:00, NaN  
29-Jan-2017 08:00:00, NaN  
29-Jan-2017 09:00:00, NaN  
29-Jan-2017 10:00:00, NaN  
29-Jan-2017 11:00:00, NaN  
29-Jan-2017 12:00:00, NaN  
29-Jan-2017 13:00:00, NaN  
29-Jan-2017 14:00:00, NaN  
29-Jan-2017 15:00:00, NaN  
29-Jan-2017 16:00:00, NaN  
29-Jan-2017 17:00:00, NaN  
29-Jan-2017 18:00:00, NaN  
29-Jan-2017 19:00:00, NaN  
29-Jan-2017 20:00:00, NaN  
29-Jan-2017 21:00:00, NaN  
29-Jan-2017 22:00:00, NaN  
29-Jan-2017 23:00:00, NaN  
30-Jan-2017, NaN  
30-Jan-2017 01:00:00, NaN  
30-Jan-2017 02:00:00, NaN  
30-Jan-2017 03:00:00, NaN  
30-Jan-2017 04:00:00, NaN  
30-Jan-2017 05:00:00, NaN  
30-Jan-2017 06:00:00, NaN  
30-Jan-2017 07:00:00, NaN  
30-Jan-2017 08:00:00, NaN  
30-Jan-2017 09:00:00, NaN  
30-Jan-2017 10:00:00, NaN  
30-Jan-2017 11:00:00, NaN  
30-Jan-2017 12:00:00, NaN  
30-Jan-2017 13:00:00, NaN  
30-Jan-2017 14:00:00, NaN  
30-Jan-2017 15:00:00, NaN  
30-Jan-2017 16:00:00, NaN  
30-Jan-2017 17:00:00, NaN  
30-Jan-2017 18:00:00, NaN  
30-Jan-2017 19:00:00, NaN  
30-Jan-2017 20:00:00, NaN  
30-Jan-2017 21:00:00, NaN  
30-Jan-2017 22:00:00, NaN  
30-Jan-2017 23:00:00, NaN  
31-Jan-2017, NaN  
31-Jan-2017 01:00:00, NaN

|              |           |     |
|--------------|-----------|-----|
| 31-Jan-2017  | 02:00:00, | NaN |
| 31-Jan-2017  | 03:00:00, | NaN |
| 31-Jan-2017  | 04:00:00, | NaN |
| 31-Jan-2017  | 05:00:00, | NaN |
| 31-Jan-2017  | 06:00:00, | NaN |
| 31-Jan-2017  | 07:00:00, | NaN |
| 31-Jan-2017  | 08:00:00, | NaN |
| 31-Jan-2017  | 09:00:00, | NaN |
| 31-Jan-2017  | 10:00:00, | NaN |
| 31-Jan-2017  | 11:00:00, | NaN |
| 31-Jan-2017  | 12:00:00, | NaN |
| 31-Jan-2017  | 13:00:00, | NaN |
| 31-Jan-2017  | 14:00:00, | NaN |
| 31-Jan-2017  | 15:00:00, | NaN |
| 31-Jan-2017  | 16:00:00, | NaN |
| 31-Jan-2017  | 17:00:00, | NaN |
| 31-Jan-2017  | 18:00:00, | NaN |
| 31-Jan-2017  | 19:00:00, | NaN |
| 31-Jan-2017  | 20:00:00, | NaN |
| 31-Jan-2017  | 21:00:00, | NaN |
| 31-Jan-2017  | 22:00:00, | NaN |
| 31-Jan-2017  | 23:00:00, | NaN |
| 01-Feb-2017, | NaN       |     |
| 01-Feb-2017  | 01:00:00, | NaN |
| 01-Feb-2017  | 02:00:00, | NaN |
| 01-Feb-2017  | 03:00:00, | NaN |
| 01-Feb-2017  | 04:00:00, | NaN |
| 01-Feb-2017  | 05:00:00, | NaN |
| 01-Feb-2017  | 06:00:00, | NaN |
| 01-Feb-2017  | 07:00:00, | NaN |
| 01-Feb-2017  | 08:00:00, | NaN |
| 01-Feb-2017  | 09:00:00, | NaN |
| 01-Feb-2017  | 10:00:00, | NaN |
| 01-Feb-2017  | 11:00:00, | NaN |
| 01-Feb-2017  | 12:00:00, | NaN |
| 01-Feb-2017  | 13:00:00, | NaN |
| 01-Feb-2017  | 14:00:00, | NaN |
| 01-Feb-2017  | 15:00:00, | NaN |
| 01-Feb-2017  | 16:00:00, | NaN |
| 01-Feb-2017  | 17:00:00, | NaN |
| 01-Feb-2017  | 18:00:00, | NaN |
| 01-Feb-2017  | 19:00:00, | NaN |
| 01-Feb-2017  | 20:00:00, | NaN |
| 01-Feb-2017  | 21:00:00, | NaN |
| 01-Feb-2017  | 22:00:00, | NaN |
| 01-Feb-2017  | 23:00:00, | NaN |
| 02-Feb-2017, | NaN       |     |
| 02-Feb-2017  | 01:00:00, | NaN |
| 02-Feb-2017  | 02:00:00, | NaN |
| 02-Feb-2017  | 03:00:00, | NaN |
| 02-Feb-2017  | 04:00:00, | NaN |
| 02-Feb-2017  | 05:00:00, | NaN |
| 02-Feb-2017  | 06:00:00, | NaN |
| 02-Feb-2017  | 07:00:00, | NaN |
| 02-Feb-2017  | 08:00:00, | NaN |
| 02-Feb-2017  | 09:00:00, | NaN |
| 02-Feb-2017  | 10:00:00, | NaN |
| 02-Feb-2017  | 11:00:00, | NaN |
| 02-Feb-2017  | 12:00:00, | NaN |
| 02-Feb-2017  | 13:00:00, | NaN |
| 02-Feb-2017  | 14:00:00, | NaN |
| 02-Feb-2017  | 15:00:00, | NaN |
| 02-Feb-2017  | 16:00:00, | NaN |
| 02-Feb-2017  | 17:00:00, | NaN |

02-Feb-2017 18:00:00, NaN  
02-Feb-2017 19:00:00, NaN  
02-Feb-2017 20:00:00, NaN  
02-Feb-2017 21:00:00, NaN  
02-Feb-2017 22:00:00, NaN  
02-Feb-2017 23:00:00, NaN  
03-Feb-2017, NaN  
03-Feb-2017 01:00:00, NaN  
03-Feb-2017 02:00:00, NaN  
03-Feb-2017 03:00:00, NaN  
03-Feb-2017 04:00:00, NaN  
03-Feb-2017 05:00:00, NaN  
03-Feb-2017 06:00:00, NaN  
03-Feb-2017 07:00:00, NaN  
03-Feb-2017 08:00:00, NaN  
03-Feb-2017 09:00:00, NaN  
03-Feb-2017 10:00:00, NaN  
03-Feb-2017 11:00:00, NaN  
03-Feb-2017 12:00:00, NaN  
03-Feb-2017 13:00:00, NaN  
03-Feb-2017 14:00:00, NaN  
03-Feb-2017 15:00:00, NaN  
03-Feb-2017 16:00:00, NaN  
03-Feb-2017 17:00:00, NaN  
03-Feb-2017 18:00:00, NaN  
03-Feb-2017 19:00:00, NaN  
03-Feb-2017 20:00:00, NaN  
03-Feb-2017 21:00:00, NaN  
03-Feb-2017 22:00:00, NaN  
03-Feb-2017 23:00:00, NaN  
04-Feb-2017, NaN  
04-Feb-2017 01:00:00, NaN  
04-Feb-2017 02:00:00, NaN  
04-Feb-2017 03:00:00, NaN  
04-Feb-2017 04:00:00, NaN  
04-Feb-2017 05:00:00, NaN  
04-Feb-2017 06:00:00, NaN  
04-Feb-2017 07:00:00, NaN  
04-Feb-2017 08:00:00, NaN  
04-Feb-2017 09:00:00, NaN  
04-Feb-2017 10:00:00, NaN  
04-Feb-2017 11:00:00, NaN  
04-Feb-2017 12:00:00, NaN  
04-Feb-2017 13:00:00, NaN  
04-Feb-2017 14:00:00, NaN  
04-Feb-2017 15:00:00, NaN  
04-Feb-2017 16:00:00, NaN  
04-Feb-2017 17:00:00, NaN  
04-Feb-2017 18:00:00, NaN  
04-Feb-2017 19:00:00, NaN  
04-Feb-2017 20:00:00, NaN  
04-Feb-2017 21:00:00, NaN  
04-Feb-2017 22:00:00, NaN  
04-Feb-2017 23:00:00, NaN  
05-Feb-2017, NaN  
05-Feb-2017 01:00:00, NaN  
05-Feb-2017 02:00:00, NaN  
05-Feb-2017 03:00:00, NaN  
05-Feb-2017 04:00:00, NaN  
05-Feb-2017 05:00:00, NaN  
05-Feb-2017 06:00:00, NaN  
05-Feb-2017 07:00:00, NaN  
05-Feb-2017 08:00:00, NaN  
05-Feb-2017 09:00:00, NaN



05-Feb-2017 10:00:00, NaN  
05-Feb-2017 11:00:00, NaN  
05-Feb-2017 12:00:00, NaN  
05-Feb-2017 13:00:00, NaN  
05-Feb-2017 14:00:00, NaN  
05-Feb-2017 15:00:00, NaN  
05-Feb-2017 16:00:00, NaN  
05-Feb-2017 17:00:00, NaN  
05-Feb-2017 18:00:00, NaN  
05-Feb-2017 19:00:00, NaN  
05-Feb-2017 20:00:00, NaN  
05-Feb-2017 21:00:00, NaN  
05-Feb-2017 22:00:00, NaN  
05-Feb-2017 23:00:00, NaN  
06-Feb-2017, NaN  
06-Feb-2017 01:00:00, NaN  
06-Feb-2017 02:00:00, NaN  
06-Feb-2017 03:00:00, NaN  
06-Feb-2017 04:00:00, NaN  
06-Feb-2017 05:00:00, NaN  
06-Feb-2017 06:00:00, NaN  
06-Feb-2017 07:00:00, NaN  
06-Feb-2017 08:00:00, NaN  
06-Feb-2017 09:00:00, NaN  
06-Feb-2017 10:00:00, NaN  
06-Feb-2017 11:00:00, NaN  
06-Feb-2017 12:00:00, NaN  
06-Feb-2017 13:00:00, NaN  
06-Feb-2017 14:00:00, NaN  
06-Feb-2017 15:00:00, NaN  
06-Feb-2017 16:00:00, NaN  
06-Feb-2017 17:00:00, NaN  
06-Feb-2017 18:00:00, NaN  
06-Feb-2017 19:00:00, NaN  
06-Feb-2017 20:00:00, NaN  
06-Feb-2017 21:00:00, NaN  
06-Feb-2017 22:00:00, NaN  
06-Feb-2017 23:00:00, NaN  
07-Feb-2017, NaN  
07-Feb-2017 01:00:00, NaN  
07-Feb-2017 02:00:00, NaN  
07-Feb-2017 03:00:00, NaN  
07-Feb-2017 04:00:00, NaN  
07-Feb-2017 05:00:00, NaN  
07-Feb-2017 06:00:00, NaN  
07-Feb-2017 07:00:00, NaN  
07-Feb-2017 08:00:00, NaN  
07-Feb-2017 09:00:00, NaN  
07-Feb-2017 10:00:00, NaN  
07-Feb-2017 11:00:00, NaN  
07-Feb-2017 12:00:00, NaN  
07-Feb-2017 13:00:00, NaN  
07-Feb-2017 14:00:00, NaN  
07-Feb-2017 15:00:00, NaN  
07-Feb-2017 16:00:00, NaN  
07-Feb-2017 17:00:00, NaN  
07-Feb-2017 18:00:00, NaN  
07-Feb-2017 19:00:00, NaN  
07-Feb-2017 20:00:00, NaN  
07-Feb-2017 21:00:00, NaN  
07-Feb-2017 22:00:00, NaN  
07-Feb-2017 23:00:00, NaN  
08-Feb-2017, NaN  
08-Feb-2017 01:00:00, NaN

08-Feb-2017 02:00:00, NaN  
08-Feb-2017 03:00:00, NaN  
08-Feb-2017 04:00:00, NaN  
08-Feb-2017 05:00:00, NaN  
08-Feb-2017 06:00:00, NaN  
08-Feb-2017 07:00:00, NaN  
08-Feb-2017 08:00:00, NaN  
08-Feb-2017 09:00:00, NaN  
08-Feb-2017 10:00:00, NaN  
08-Feb-2017 11:00:00, NaN  
08-Feb-2017 12:00:00, NaN  
08-Feb-2017 13:00:00, NaN  
08-Feb-2017 14:00:00, NaN  
08-Feb-2017 15:00:00, NaN  
08-Feb-2017 16:00:00, NaN  
08-Feb-2017 17:00:00, NaN  
08-Feb-2017 18:00:00, NaN  
08-Feb-2017 19:00:00, NaN  
08-Feb-2017 20:00:00, NaN  
08-Feb-2017 21:00:00, NaN  
08-Feb-2017 22:00:00, NaN  
08-Feb-2017 23:00:00, NaN  
09-Feb-2017, NaN  
09-Feb-2017 01:00:00, NaN  
09-Feb-2017 02:00:00, NaN  
09-Feb-2017 03:00:00, NaN  
09-Feb-2017 04:00:00, NaN  
09-Feb-2017 05:00:00, NaN  
09-Feb-2017 06:00:00, NaN  
09-Feb-2017 07:00:00, NaN  
09-Feb-2017 08:00:00, NaN  
09-Feb-2017 09:00:00, NaN  
09-Feb-2017 10:00:00, NaN  
09-Feb-2017 11:00:00, NaN  
09-Feb-2017 12:00:00, NaN  
09-Feb-2017 13:00:00, NaN  
09-Feb-2017 14:00:00, NaN  
09-Feb-2017 15:00:00, NaN  
09-Feb-2017 16:00:00, NaN  
09-Feb-2017 17:00:00, NaN  
09-Feb-2017 18:00:00, NaN  
09-Feb-2017 19:00:00, NaN  
09-Feb-2017 20:00:00, NaN  
09-Feb-2017 21:00:00, NaN  
09-Feb-2017 22:00:00, NaN  
09-Feb-2017 23:00:00, NaN  
10-Feb-2017, NaN  
10-Feb-2017 01:00:00, NaN  
10-Feb-2017 02:00:00, NaN  
10-Feb-2017 03:00:00, NaN  
10-Feb-2017 04:00:00, NaN  
10-Feb-2017 05:00:00, NaN  
10-Feb-2017 06:00:00, NaN  
10-Feb-2017 07:00:00, NaN  
10-Feb-2017 08:00:00, NaN  
10-Feb-2017 09:00:00, NaN  
10-Feb-2017 10:00:00, NaN  
10-Feb-2017 11:00:00, NaN  
10-Feb-2017 12:00:00, NaN  
10-Feb-2017 13:00:00, NaN  
10-Feb-2017 14:00:00, NaN  
10-Feb-2017 15:00:00, NaN  
10-Feb-2017 16:00:00, NaN  
10-Feb-2017 17:00:00, NaN

10-Feb-2017 18:00:00, NaN  
10-Feb-2017 19:00:00, NaN  
10-Feb-2017 20:00:00, NaN  
10-Feb-2017 21:00:00, NaN  
10-Feb-2017 22:00:00, NaN  
10-Feb-2017 23:00:00, NaN  
11-Feb-2017, NaN  
11-Feb-2017 01:00:00, NaN  
11-Feb-2017 02:00:00, NaN  
11-Feb-2017 03:00:00, NaN  
11-Feb-2017 04:00:00, NaN  
11-Feb-2017 05:00:00, NaN  
11-Feb-2017 06:00:00, NaN  
11-Feb-2017 07:00:00, NaN  
11-Feb-2017 08:00:00, NaN  
11-Feb-2017 09:00:00, NaN  
11-Feb-2017 10:00:00, NaN  
11-Feb-2017 11:00:00, NaN  
11-Feb-2017 12:00:00, NaN  
11-Feb-2017 13:00:00, NaN  
11-Feb-2017 14:00:00, NaN  
11-Feb-2017 15:00:00, NaN  
11-Feb-2017 16:00:00, NaN  
11-Feb-2017 17:00:00, NaN  
11-Feb-2017 18:00:00, NaN  
11-Feb-2017 19:00:00, NaN  
11-Feb-2017 20:00:00, NaN  
11-Feb-2017 21:00:00, NaN  
11-Feb-2017 22:00:00, NaN  
11-Feb-2017 23:00:00, NaN  
12-Feb-2017, NaN  
12-Feb-2017 01:00:00, NaN  
12-Feb-2017 02:00:00, NaN  
12-Feb-2017 03:00:00, NaN  
12-Feb-2017 04:00:00, NaN  
12-Feb-2017 05:00:00, NaN  
12-Feb-2017 06:00:00, NaN  
12-Feb-2017 07:00:00, NaN  
12-Feb-2017 08:00:00, NaN  
12-Feb-2017 09:00:00, NaN  
12-Feb-2017 10:00:00, NaN  
12-Feb-2017 11:00:00, NaN  
12-Feb-2017 12:00:00, NaN  
12-Feb-2017 13:00:00, NaN  
12-Feb-2017 14:00:00, NaN  
12-Feb-2017 15:00:00, NaN  
12-Feb-2017 16:00:00, NaN  
12-Feb-2017 17:00:00, NaN  
12-Feb-2017 18:00:00, NaN  
12-Feb-2017 19:00:00, NaN  
12-Feb-2017 20:00:00, NaN  
12-Feb-2017 21:00:00, NaN  
12-Feb-2017 22:00:00, NaN  
12-Feb-2017 23:00:00, NaN  
13-Feb-2017, NaN  
13-Feb-2017 01:00:00, NaN  
13-Feb-2017 02:00:00, NaN  
13-Feb-2017 03:00:00, NaN  
13-Feb-2017 04:00:00, NaN  
13-Feb-2017 05:00:00, NaN  
13-Feb-2017 06:00:00, NaN  
13-Feb-2017 07:00:00, NaN  
13-Feb-2017 08:00:00, NaN  
13-Feb-2017 09:00:00, NaN

13-Feb-2017 10:00:00, NaN  
13-Feb-2017 11:00:00, NaN  
13-Feb-2017 12:00:00, NaN  
13-Feb-2017 13:00:00, NaN  
13-Feb-2017 14:00:00, NaN  
13-Feb-2017 15:00:00, NaN  
13-Feb-2017 16:00:00, NaN  
13-Feb-2017 17:00:00, NaN  
13-Feb-2017 18:00:00, NaN  
13-Feb-2017 19:00:00, NaN  
13-Feb-2017 20:00:00, NaN  
13-Feb-2017 21:00:00, NaN  
13-Feb-2017 22:00:00, NaN  
13-Feb-2017 23:00:00, NaN  
14-Feb-2017, NaN  
14-Feb-2017 01:00:00, NaN  
14-Feb-2017 02:00:00, NaN  
14-Feb-2017 03:00:00, NaN  
14-Feb-2017 04:00:00, NaN  
14-Feb-2017 05:00:00, NaN  
14-Feb-2017 06:00:00, NaN  
14-Feb-2017 07:00:00, NaN  
14-Feb-2017 08:00:00, NaN  
14-Feb-2017 09:00:00, NaN  
14-Feb-2017 10:00:00, NaN  
14-Feb-2017 11:00:00, NaN  
14-Feb-2017 12:00:00, NaN  
14-Feb-2017 13:00:00, NaN  
14-Feb-2017 14:00:00, NaN  
14-Feb-2017 15:00:00, NaN  
14-Feb-2017 16:00:00, NaN  
14-Feb-2017 17:00:00, NaN  
14-Feb-2017 18:00:00, NaN  
14-Feb-2017 19:00:00, NaN  
14-Feb-2017 20:00:00, NaN  
14-Feb-2017 21:00:00, NaN  
14-Feb-2017 22:00:00, NaN  
14-Feb-2017 23:00:00, NaN  
15-Feb-2017, NaN  
15-Feb-2017 01:00:00, NaN  
15-Feb-2017 02:00:00, NaN  
15-Feb-2017 03:00:00, NaN  
15-Feb-2017 04:00:00, NaN  
15-Feb-2017 05:00:00, NaN  
15-Feb-2017 06:00:00, NaN  
15-Feb-2017 07:00:00, NaN  
15-Feb-2017 08:00:00, NaN  
15-Feb-2017 09:00:00, NaN  
15-Feb-2017 10:00:00, NaN  
15-Feb-2017 11:00:00, NaN  
15-Feb-2017 12:00:00, NaN  
15-Feb-2017 13:00:00, NaN  
15-Feb-2017 14:00:00, NaN  
15-Feb-2017 15:00:00, NaN  
15-Feb-2017 16:00:00, NaN  
15-Feb-2017 17:00:00, NaN  
15-Feb-2017 18:00:00, NaN  
15-Feb-2017 19:00:00, NaN  
15-Feb-2017 20:00:00, NaN  
15-Feb-2017 21:00:00, NaN  
15-Feb-2017 22:00:00, NaN  
15-Feb-2017 23:00:00, NaN  
16-Feb-2017, NaN  
16-Feb-2017 01:00:00, NaN

16-Feb-2017 02:00:00, NaN  
16-Feb-2017 03:00:00, NaN  
16-Feb-2017 04:00:00, NaN  
16-Feb-2017 05:00:00, NaN  
16-Feb-2017 06:00:00, NaN  
16-Feb-2017 07:00:00, NaN  
16-Feb-2017 08:00:00, NaN  
16-Feb-2017 09:00:00, NaN  
16-Feb-2017 10:00:00, NaN  
16-Feb-2017 11:00:00, NaN  
16-Feb-2017 12:00:00, NaN  
16-Feb-2017 13:00:00, NaN  
16-Feb-2017 14:00:00, NaN  
16-Feb-2017 15:00:00, NaN  
16-Feb-2017 16:00:00, NaN  
16-Feb-2017 17:00:00, NaN  
16-Feb-2017 18:00:00, NaN  
16-Feb-2017 19:00:00, NaN  
16-Feb-2017 20:00:00, NaN  
16-Feb-2017 21:00:00, NaN  
16-Feb-2017 22:00:00, NaN  
16-Feb-2017 23:00:00, NaN  
17-Feb-2017, NaN  
17-Feb-2017 01:00:00, NaN  
17-Feb-2017 02:00:00, NaN  
17-Feb-2017 03:00:00, NaN  
17-Feb-2017 04:00:00, NaN  
17-Feb-2017 05:00:00, NaN  
17-Feb-2017 06:00:00, NaN  
17-Feb-2017 07:00:00, NaN  
17-Feb-2017 08:00:00, NaN  
17-Feb-2017 09:00:00, NaN  
17-Feb-2017 10:00:00, NaN  
17-Feb-2017 11:00:00, NaN  
17-Feb-2017 12:00:00, NaN  
17-Feb-2017 13:00:00, NaN  
17-Feb-2017 14:00:00, NaN  
17-Feb-2017 15:00:00, NaN  
17-Feb-2017 16:00:00, NaN  
17-Feb-2017 17:00:00, NaN  
17-Feb-2017 18:00:00, NaN  
17-Feb-2017 19:00:00, NaN  
17-Feb-2017 20:00:00, NaN  
17-Feb-2017 21:00:00, NaN  
17-Feb-2017 22:00:00, NaN  
17-Feb-2017 23:00:00, NaN  
18-Feb-2017, NaN  
18-Feb-2017 01:00:00, NaN  
18-Feb-2017 02:00:00, NaN  
18-Feb-2017 03:00:00, NaN  
18-Feb-2017 04:00:00, NaN  
18-Feb-2017 05:00:00, NaN  
18-Feb-2017 06:00:00, NaN  
18-Feb-2017 07:00:00, NaN  
18-Feb-2017 08:00:00, NaN  
18-Feb-2017 09:00:00, NaN  
18-Feb-2017 10:00:00, NaN  
18-Feb-2017 11:00:00, NaN  
18-Feb-2017 12:00:00, NaN  
18-Feb-2017 13:00:00, NaN  
18-Feb-2017 14:00:00, NaN  
18-Feb-2017 15:00:00, NaN  
18-Feb-2017 16:00:00, NaN  
18-Feb-2017 17:00:00, NaN

18-Feb-2017 18:00:00, NaN  
18-Feb-2017 19:00:00, NaN  
18-Feb-2017 20:00:00, NaN  
18-Feb-2017 21:00:00, NaN  
18-Feb-2017 22:00:00, NaN  
18-Feb-2017 23:00:00, NaN  
19-Feb-2017, NaN  
19-Feb-2017 01:00:00, NaN  
19-Feb-2017 02:00:00, NaN  
19-Feb-2017 03:00:00, NaN  
19-Feb-2017 04:00:00, NaN  
19-Feb-2017 05:00:00, NaN  
19-Feb-2017 06:00:00, NaN  
19-Feb-2017 07:00:00, NaN  
19-Feb-2017 08:00:00, NaN  
19-Feb-2017 09:00:00, NaN  
19-Feb-2017 10:00:00, NaN  
19-Feb-2017 11:00:00, NaN  
19-Feb-2017 12:00:00, NaN  
19-Feb-2017 13:00:00, NaN  
19-Feb-2017 14:00:00, NaN  
19-Feb-2017 15:00:00, NaN  
19-Feb-2017 16:00:00, NaN  
19-Feb-2017 17:00:00, NaN  
19-Feb-2017 18:00:00, NaN  
19-Feb-2017 19:00:00, NaN  
19-Feb-2017 20:00:00, NaN  
19-Feb-2017 21:00:00, NaN  
19-Feb-2017 22:00:00, NaN  
19-Feb-2017 23:00:00, NaN  
20-Feb-2017, NaN  
20-Feb-2017 01:00:00, NaN  
20-Feb-2017 02:00:00, NaN  
20-Feb-2017 03:00:00, NaN  
20-Feb-2017 04:00:00, NaN  
20-Feb-2017 05:00:00, NaN  
20-Feb-2017 06:00:00, NaN  
20-Feb-2017 07:00:00, NaN  
20-Feb-2017 08:00:00, NaN  
20-Feb-2017 09:00:00, NaN  
20-Feb-2017 10:00:00, NaN  
20-Feb-2017 11:00:00, NaN  
20-Feb-2017 12:00:00, NaN  
20-Feb-2017 13:00:00, NaN  
20-Feb-2017 14:00:00, NaN  
20-Feb-2017 15:00:00, NaN  
20-Feb-2017 16:00:00, NaN  
20-Feb-2017 17:00:00, NaN  
20-Feb-2017 18:00:00, NaN  
20-Feb-2017 19:00:00, NaN  
20-Feb-2017 20:00:00, NaN  
20-Feb-2017 21:00:00, NaN  
20-Feb-2017 22:00:00, NaN  
20-Feb-2017 23:00:00, NaN  
21-Feb-2017, NaN  
21-Feb-2017 01:00:00, NaN  
21-Feb-2017 02:00:00, NaN  
21-Feb-2017 03:00:00, NaN  
21-Feb-2017 04:00:00, NaN  
21-Feb-2017 05:00:00, NaN  
21-Feb-2017 06:00:00, NaN  
21-Feb-2017 07:00:00, NaN  
21-Feb-2017 08:00:00, NaN  
21-Feb-2017 09:00:00, NaN

21-Feb-2017 10:00:00, NaN  
21-Feb-2017 11:00:00, NaN  
21-Feb-2017 12:00:00, NaN  
21-Feb-2017 13:00:00, NaN  
21-Feb-2017 14:00:00, NaN  
21-Feb-2017 15:00:00, NaN  
21-Feb-2017 16:00:00, NaN  
21-Feb-2017 17:00:00, NaN  
21-Feb-2017 18:00:00, NaN  
21-Feb-2017 19:00:00, NaN  
21-Feb-2017 20:00:00, NaN  
21-Feb-2017 21:00:00, NaN  
21-Feb-2017 22:00:00, NaN  
21-Feb-2017 23:00:00, NaN  
22-Feb-2017, NaN  
22-Feb-2017 01:00:00, NaN  
22-Feb-2017 02:00:00, NaN  
22-Feb-2017 03:00:00, NaN  
22-Feb-2017 04:00:00, NaN  
22-Feb-2017 05:00:00, NaN  
22-Feb-2017 06:00:00, NaN  
22-Feb-2017 07:00:00, NaN  
22-Feb-2017 08:00:00, NaN  
22-Feb-2017 09:00:00, NaN  
22-Feb-2017 10:00:00, NaN  
22-Feb-2017 11:00:00, NaN  
22-Feb-2017 12:00:00, NaN  
22-Feb-2017 13:00:00, NaN  
22-Feb-2017 14:00:00, NaN  
22-Feb-2017 15:00:00, NaN  
22-Feb-2017 16:00:00, NaN  
22-Feb-2017 17:00:00, NaN  
22-Feb-2017 18:00:00, NaN  
22-Feb-2017 19:00:00, NaN  
22-Feb-2017 20:00:00, NaN  
22-Feb-2017 21:00:00, NaN  
22-Feb-2017 22:00:00, NaN  
22-Feb-2017 23:00:00, NaN  
23-Feb-2017, NaN  
23-Feb-2017 01:00:00, NaN  
23-Feb-2017 02:00:00, NaN  
23-Feb-2017 03:00:00, NaN  
23-Feb-2017 04:00:00, NaN  
23-Feb-2017 05:00:00, NaN  
23-Feb-2017 06:00:00, NaN  
23-Feb-2017 07:00:00, NaN  
23-Feb-2017 08:00:00, NaN  
23-Feb-2017 09:00:00, NaN  
23-Feb-2017 10:00:00, NaN  
23-Feb-2017 11:00:00, NaN  
23-Feb-2017 12:00:00, NaN  
23-Feb-2017 13:00:00, NaN  
23-Feb-2017 14:00:00, NaN  
23-Feb-2017 15:00:00, NaN  
23-Feb-2017 16:00:00, NaN  
23-Feb-2017 17:00:00, NaN  
23-Feb-2017 18:00:00, NaN  
23-Feb-2017 19:00:00, NaN  
23-Feb-2017 20:00:00, NaN  
23-Feb-2017 21:00:00, NaN  
23-Feb-2017 22:00:00, NaN  
23-Feb-2017 23:00:00, NaN  
24-Feb-2017, NaN  
24-Feb-2017 01:00:00, NaN

|              |           |     |
|--------------|-----------|-----|
| 24-Feb-2017  | 02:00:00, | NaN |
| 24-Feb-2017  | 03:00:00, | NaN |
| 24-Feb-2017  | 04:00:00, | NaN |
| 24-Feb-2017  | 05:00:00, | NaN |
| 24-Feb-2017  | 06:00:00, | NaN |
| 24-Feb-2017  | 07:00:00, | NaN |
| 24-Feb-2017  | 08:00:00, | NaN |
| 24-Feb-2017  | 09:00:00, | NaN |
| 24-Feb-2017  | 10:00:00, | NaN |
| 24-Feb-2017  | 11:00:00, | NaN |
| 24-Feb-2017  | 12:00:00, | NaN |
| 24-Feb-2017  | 13:00:00, | NaN |
| 24-Feb-2017  | 14:00:00, | NaN |
| 24-Feb-2017  | 15:00:00, | NaN |
| 24-Feb-2017  | 16:00:00, | NaN |
| 24-Feb-2017  | 17:00:00, | NaN |
| 24-Feb-2017  | 18:00:00, | NaN |
| 24-Feb-2017  | 19:00:00, | NaN |
| 24-Feb-2017  | 20:00:00, | NaN |
| 24-Feb-2017  | 21:00:00, | NaN |
| 24-Feb-2017  | 22:00:00, | NaN |
| 24-Feb-2017  | 23:00:00, | NaN |
| 25-Feb-2017, | NaN       |     |
| 25-Feb-2017  | 01:00:00, | NaN |
| 25-Feb-2017  | 02:00:00, | NaN |
| 25-Feb-2017  | 03:00:00, | NaN |
| 25-Feb-2017  | 04:00:00, | NaN |
| 25-Feb-2017  | 05:00:00, | NaN |
| 25-Feb-2017  | 06:00:00, | NaN |
| 25-Feb-2017  | 07:00:00, | NaN |
| 25-Feb-2017  | 08:00:00, | NaN |
| 25-Feb-2017  | 09:00:00, | NaN |
| 25-Feb-2017  | 10:00:00, | NaN |
| 25-Feb-2017  | 11:00:00, | NaN |
| 25-Feb-2017  | 12:00:00, | NaN |
| 25-Feb-2017  | 13:00:00, | NaN |
| 25-Feb-2017  | 14:00:00, | NaN |
| 25-Feb-2017  | 15:00:00, | NaN |
| 25-Feb-2017  | 16:00:00, | NaN |
| 25-Feb-2017  | 17:00:00, | NaN |
| 25-Feb-2017  | 18:00:00, | NaN |
| 25-Feb-2017  | 19:00:00, | NaN |
| 25-Feb-2017  | 20:00:00, | NaN |
| 25-Feb-2017  | 21:00:00, | NaN |
| 25-Feb-2017  | 22:00:00, | NaN |
| 25-Feb-2017  | 23:00:00, | NaN |
| 26-Feb-2017, | NaN       |     |
| 26-Feb-2017  | 01:00:00, | NaN |
| 26-Feb-2017  | 02:00:00, | NaN |
| 26-Feb-2017  | 03:00:00, | NaN |
| 26-Feb-2017  | 04:00:00, | NaN |
| 26-Feb-2017  | 05:00:00, | NaN |
| 26-Feb-2017  | 06:00:00, | NaN |
| 26-Feb-2017  | 07:00:00, | NaN |
| 26-Feb-2017  | 08:00:00, | NaN |
| 26-Feb-2017  | 09:00:00, | NaN |
| 26-Feb-2017  | 10:00:00, | NaN |
| 26-Feb-2017  | 11:00:00, | NaN |
| 26-Feb-2017  | 12:00:00, | NaN |
| 26-Feb-2017  | 13:00:00, | NaN |
| 26-Feb-2017  | 14:00:00, | NaN |
| 26-Feb-2017  | 15:00:00, | NaN |
| 26-Feb-2017  | 16:00:00, | NaN |
| 26-Feb-2017  | 17:00:00, | NaN |



26-Feb-2017 18:00:00, NaN  
26-Feb-2017 19:00:00, NaN  
26-Feb-2017 20:00:00, NaN  
26-Feb-2017 21:00:00, NaN  
26-Feb-2017 22:00:00, NaN  
26-Feb-2017 23:00:00, NaN  
27-Feb-2017, NaN  
27-Feb-2017 01:00:00, NaN  
27-Feb-2017 02:00:00, NaN  
27-Feb-2017 03:00:00, NaN  
27-Feb-2017 04:00:00, NaN  
27-Feb-2017 05:00:00, NaN  
27-Feb-2017 06:00:00, NaN  
27-Feb-2017 07:00:00, NaN  
27-Feb-2017 08:00:00, NaN  
27-Feb-2017 09:00:00, NaN  
27-Feb-2017 10:00:00, NaN  
27-Feb-2017 11:00:00, NaN  
27-Feb-2017 12:00:00, NaN  
27-Feb-2017 13:00:00, NaN  
27-Feb-2017 14:00:00, NaN  
27-Feb-2017 15:00:00, NaN  
27-Feb-2017 16:00:00, NaN  
27-Feb-2017 17:00:00, NaN  
27-Feb-2017 18:00:00, NaN  
27-Feb-2017 19:00:00, NaN  
27-Feb-2017 20:00:00, NaN  
27-Feb-2017 21:00:00, NaN  
27-Feb-2017 22:00:00, NaN  
27-Feb-2017 23:00:00, NaN  
28-Feb-2017, NaN  
28-Feb-2017 01:00:00, NaN  
28-Feb-2017 02:00:00, NaN  
28-Feb-2017 03:00:00, NaN  
28-Feb-2017 04:00:00, NaN  
28-Feb-2017 05:00:00, NaN  
28-Feb-2017 06:00:00, NaN  
28-Feb-2017 07:00:00, NaN  
28-Feb-2017 08:00:00, NaN  
28-Feb-2017 09:00:00, NaN  
28-Feb-2017 10:00:00, NaN  
28-Feb-2017 11:00:00, NaN  
28-Feb-2017 12:00:00, NaN  
28-Feb-2017 13:00:00, NaN  
28-Feb-2017 14:00:00, NaN  
28-Feb-2017 15:00:00, NaN  
28-Feb-2017 16:00:00, NaN  
28-Feb-2017 17:00:00, NaN  
28-Feb-2017 18:00:00, NaN  
28-Feb-2017 19:00:00, NaN  
28-Feb-2017 20:00:00, NaN  
28-Feb-2017 21:00:00, NaN  
28-Feb-2017 22:00:00, NaN  
28-Feb-2017 23:00:00, NaN  
01-Mar-2017, NaN  
01-Mar-2017 01:00:00, NaN  
01-Mar-2017 02:00:00, NaN  
01-Mar-2017 03:00:00, NaN  
01-Mar-2017 04:00:00, NaN  
01-Mar-2017 05:00:00, NaN  
01-Mar-2017 06:00:00, NaN  
01-Mar-2017 07:00:00, NaN  
01-Mar-2017 08:00:00, NaN  
01-Mar-2017 09:00:00, NaN

01-Mar-2017 10:00:00, NaN  
01-Mar-2017 11:00:00, NaN  
01-Mar-2017 12:00:00, NaN  
01-Mar-2017 13:00:00, NaN  
01-Mar-2017 14:00:00, NaN  
01-Mar-2017 15:00:00, NaN  
01-Mar-2017 16:00:00, NaN  
01-Mar-2017 17:00:00, NaN  
01-Mar-2017 18:00:00, NaN  
01-Mar-2017 19:00:00, NaN  
01-Mar-2017 20:00:00, NaN  
01-Mar-2017 21:00:00, NaN  
01-Mar-2017 22:00:00, NaN  
01-Mar-2017 23:00:00, NaN  
02-Mar-2017, NaN  
02-Mar-2017 01:00:00, NaN  
02-Mar-2017 02:00:00, NaN  
02-Mar-2017 03:00:00, NaN  
02-Mar-2017 04:00:00, NaN  
02-Mar-2017 05:00:00, NaN  
02-Mar-2017 06:00:00, NaN  
02-Mar-2017 07:00:00, NaN  
02-Mar-2017 08:00:00, NaN  
02-Mar-2017 09:00:00, NaN  
02-Mar-2017 10:00:00, NaN  
02-Mar-2017 11:00:00, NaN  
02-Mar-2017 12:00:00, NaN  
02-Mar-2017 13:00:00, NaN  
02-Mar-2017 14:00:00, NaN  
02-Mar-2017 15:00:00, NaN  
02-Mar-2017 16:00:00, NaN  
02-Mar-2017 17:00:00, NaN  
02-Mar-2017 18:00:00, NaN  
02-Mar-2017 19:00:00, NaN  
02-Mar-2017 20:00:00, NaN  
02-Mar-2017 21:00:00, NaN  
02-Mar-2017 22:00:00, NaN  
02-Mar-2017 23:00:00, NaN  
03-Mar-2017, NaN  
03-Mar-2017 01:00:00, NaN  
03-Mar-2017 02:00:00, NaN  
03-Mar-2017 03:00:00, NaN  
03-Mar-2017 04:00:00, NaN  
03-Mar-2017 05:00:00, NaN  
03-Mar-2017 06:00:00, NaN  
03-Mar-2017 07:00:00, NaN  
03-Mar-2017 08:00:00, NaN  
03-Mar-2017 09:00:00, NaN  
03-Mar-2017 10:00:00, NaN  
03-Mar-2017 11:00:00, NaN  
03-Mar-2017 12:00:00, NaN  
03-Mar-2017 13:00:00, NaN  
03-Mar-2017 14:00:00, NaN  
03-Mar-2017 15:00:00, NaN  
03-Mar-2017 16:00:00, NaN  
03-Mar-2017 17:00:00, NaN  
03-Mar-2017 18:00:00, NaN  
03-Mar-2017 19:00:00, NaN  
03-Mar-2017 20:00:00, NaN  
03-Mar-2017 21:00:00, NaN  
03-Mar-2017 22:00:00, NaN  
03-Mar-2017 23:00:00, NaN  
04-Mar-2017, NaN  
04-Mar-2017 01:00:00, NaN

|              |           |     |
|--------------|-----------|-----|
| 04-Mar-2017  | 02:00:00, | NaN |
| 04-Mar-2017  | 03:00:00, | NaN |
| 04-Mar-2017  | 04:00:00, | NaN |
| 04-Mar-2017  | 05:00:00, | NaN |
| 04-Mar-2017  | 06:00:00, | NaN |
| 04-Mar-2017  | 07:00:00, | NaN |
| 04-Mar-2017  | 08:00:00, | NaN |
| 04-Mar-2017  | 09:00:00, | NaN |
| 04-Mar-2017  | 10:00:00, | NaN |
| 04-Mar-2017  | 11:00:00, | NaN |
| 04-Mar-2017  | 12:00:00, | NaN |
| 04-Mar-2017  | 13:00:00, | NaN |
| 04-Mar-2017  | 14:00:00, | NaN |
| 04-Mar-2017  | 15:00:00, | NaN |
| 04-Mar-2017  | 16:00:00, | NaN |
| 04-Mar-2017  | 17:00:00, | NaN |
| 04-Mar-2017  | 18:00:00, | NaN |
| 04-Mar-2017  | 19:00:00, | NaN |
| 04-Mar-2017  | 20:00:00, | NaN |
| 04-Mar-2017  | 21:00:00, | NaN |
| 04-Mar-2017  | 22:00:00, | NaN |
| 04-Mar-2017  | 23:00:00, | NaN |
| 05-Mar-2017, | NaN       |     |
| 05-Mar-2017  | 01:00:00, | NaN |
| 05-Mar-2017  | 02:00:00, | NaN |
| 05-Mar-2017  | 03:00:00, | NaN |
| 05-Mar-2017  | 04:00:00, | NaN |
| 05-Mar-2017  | 05:00:00, | NaN |
| 05-Mar-2017  | 06:00:00, | NaN |
| 05-Mar-2017  | 07:00:00, | NaN |
| 05-Mar-2017  | 08:00:00, | NaN |
| 05-Mar-2017  | 09:00:00, | NaN |
| 05-Mar-2017  | 10:00:00, | NaN |
| 05-Mar-2017  | 11:00:00, | NaN |
| 05-Mar-2017  | 12:00:00, | NaN |
| 05-Mar-2017  | 13:00:00, | NaN |
| 05-Mar-2017  | 14:00:00, | NaN |
| 05-Mar-2017  | 15:00:00, | NaN |
| 05-Mar-2017  | 16:00:00, | NaN |
| 05-Mar-2017  | 17:00:00, | NaN |
| 05-Mar-2017  | 18:00:00, | NaN |
| 05-Mar-2017  | 19:00:00, | NaN |
| 05-Mar-2017  | 20:00:00, | NaN |
| 05-Mar-2017  | 21:00:00, | NaN |
| 05-Mar-2017  | 22:00:00, | NaN |
| 05-Mar-2017  | 23:00:00, | NaN |
| 06-Mar-2017, | NaN       |     |
| 06-Mar-2017  | 01:00:00, | NaN |
| 06-Mar-2017  | 02:00:00, | NaN |
| 06-Mar-2017  | 03:00:00, | NaN |
| 06-Mar-2017  | 04:00:00, | NaN |
| 06-Mar-2017  | 05:00:00, | NaN |
| 06-Mar-2017  | 06:00:00, | NaN |
| 06-Mar-2017  | 07:00:00, | NaN |
| 06-Mar-2017  | 08:00:00, | NaN |
| 06-Mar-2017  | 09:00:00, | NaN |
| 06-Mar-2017  | 10:00:00, | NaN |
| 06-Mar-2017  | 11:00:00, | NaN |
| 06-Mar-2017  | 12:00:00, | NaN |
| 06-Mar-2017  | 13:00:00, | NaN |
| 06-Mar-2017  | 14:00:00, | NaN |
| 06-Mar-2017  | 15:00:00, | NaN |
| 06-Mar-2017  | 16:00:00, | NaN |
| 06-Mar-2017  | 17:00:00, | NaN |

06-Mar-2017 18:00:00, NaN  
06-Mar-2017 19:00:00, NaN  
06-Mar-2017 20:00:00, NaN  
06-Mar-2017 21:00:00, NaN  
06-Mar-2017 22:00:00, NaN  
06-Mar-2017 23:00:00, NaN  
07-Mar-2017, NaN  
07-Mar-2017 01:00:00, NaN  
07-Mar-2017 02:00:00, NaN  
07-Mar-2017 03:00:00, NaN  
07-Mar-2017 04:00:00, NaN  
07-Mar-2017 05:00:00, NaN  
07-Mar-2017 06:00:00, NaN  
07-Mar-2017 07:00:00, NaN  
07-Mar-2017 08:00:00, NaN  
07-Mar-2017 09:00:00, NaN  
07-Mar-2017 10:00:00, NaN  
07-Mar-2017 11:00:00, NaN  
07-Mar-2017 12:00:00, NaN  
07-Mar-2017 13:00:00, NaN  
07-Mar-2017 14:00:00, NaN  
07-Mar-2017 15:00:00, NaN  
07-Mar-2017 16:00:00, NaN  
07-Mar-2017 17:00:00, NaN  
07-Mar-2017 18:00:00, NaN  
07-Mar-2017 19:00:00, NaN  
07-Mar-2017 20:00:00, NaN  
07-Mar-2017 21:00:00, NaN  
07-Mar-2017 22:00:00, NaN  
07-Mar-2017 23:00:00, NaN  
08-Mar-2017, NaN  
08-Mar-2017 01:00:00, NaN  
08-Mar-2017 02:00:00, NaN  
08-Mar-2017 03:00:00, NaN  
08-Mar-2017 04:00:00, NaN  
08-Mar-2017 05:00:00, NaN  
08-Mar-2017 06:00:00, NaN  
08-Mar-2017 07:00:00, NaN  
08-Mar-2017 08:00:00, NaN  
08-Mar-2017 09:00:00, NaN  
08-Mar-2017 10:00:00, NaN  
08-Mar-2017 11:00:00, NaN  
08-Mar-2017 12:00:00, NaN  
08-Mar-2017 13:00:00, NaN  
08-Mar-2017 14:00:00, NaN  
08-Mar-2017 15:00:00, NaN  
08-Mar-2017 16:00:00, NaN  
08-Mar-2017 17:00:00, NaN  
08-Mar-2017 18:00:00, NaN  
08-Mar-2017 19:00:00, NaN  
08-Mar-2017 20:00:00, NaN  
08-Mar-2017 21:00:00, NaN  
08-Mar-2017 22:00:00, NaN  
08-Mar-2017 23:00:00, NaN  
09-Mar-2017, NaN  
09-Mar-2017 01:00:00, NaN  
09-Mar-2017 02:00:00, NaN  
09-Mar-2017 03:00:00, NaN  
09-Mar-2017 04:00:00, NaN  
09-Mar-2017 05:00:00, NaN  
09-Mar-2017 06:00:00, NaN  
09-Mar-2017 07:00:00, NaN  
09-Mar-2017 08:00:00, NaN  
09-Mar-2017 09:00:00, NaN

09-Mar-2017 10:00:00, NaN  
09-Mar-2017 11:00:00, NaN  
09-Mar-2017 12:00:00, NaN  
09-Mar-2017 13:00:00, NaN  
09-Mar-2017 14:00:00, NaN  
09-Mar-2017 15:00:00, NaN  
09-Mar-2017 16:00:00, NaN  
09-Mar-2017 17:00:00, NaN  
09-Mar-2017 18:00:00, NaN  
09-Mar-2017 19:00:00, NaN  
09-Mar-2017 20:00:00, NaN  
09-Mar-2017 21:00:00, NaN  
09-Mar-2017 22:00:00, NaN  
09-Mar-2017 23:00:00, NaN  
10-Mar-2017, NaN  
10-Mar-2017 01:00:00, NaN  
10-Mar-2017 02:00:00, NaN  
10-Mar-2017 03:00:00, NaN  
10-Mar-2017 04:00:00, NaN  
10-Mar-2017 05:00:00, NaN  
10-Mar-2017 06:00:00, NaN  
10-Mar-2017 07:00:00, NaN  
10-Mar-2017 08:00:00, NaN  
10-Mar-2017 09:00:00, NaN  
10-Mar-2017 10:00:00, NaN  
10-Mar-2017 11:00:00, NaN  
10-Mar-2017 12:00:00, NaN  
10-Mar-2017 13:00:00, NaN  
10-Mar-2017 14:00:00, NaN  
10-Mar-2017 15:00:00, NaN  
10-Mar-2017 16:00:00, NaN  
10-Mar-2017 17:00:00, NaN  
10-Mar-2017 18:00:00, NaN  
10-Mar-2017 19:00:00, NaN  
10-Mar-2017 20:00:00, NaN  
10-Mar-2017 21:00:00, NaN  
10-Mar-2017 22:00:00, NaN  
10-Mar-2017 23:00:00, NaN  
11-Mar-2017, NaN  
11-Mar-2017 01:00:00, NaN  
11-Mar-2017 02:00:00, NaN  
11-Mar-2017 03:00:00, NaN  
11-Mar-2017 04:00:00, NaN  
11-Mar-2017 05:00:00, NaN  
11-Mar-2017 06:00:00, NaN  
11-Mar-2017 07:00:00, NaN  
11-Mar-2017 08:00:00, NaN  
11-Mar-2017 09:00:00, NaN  
11-Mar-2017 10:00:00, NaN  
11-Mar-2017 11:00:00, NaN  
11-Mar-2017 12:00:00, NaN  
11-Mar-2017 13:00:00, NaN  
11-Mar-2017 14:00:00, NaN  
11-Mar-2017 15:00:00, NaN  
11-Mar-2017 16:00:00, NaN  
11-Mar-2017 17:00:00, NaN  
11-Mar-2017 18:00:00, NaN  
11-Mar-2017 19:00:00, NaN  
11-Mar-2017 20:00:00, NaN  
11-Mar-2017 21:00:00, NaN  
11-Mar-2017 22:00:00, NaN  
11-Mar-2017 23:00:00, NaN  
12-Mar-2017, NaN  
12-Mar-2017 01:00:00, NaN

12-Mar-2017 02:00:00, NaN  
12-Mar-2017 03:00:00, NaN  
12-Mar-2017 04:00:00, NaN  
12-Mar-2017 05:00:00, NaN  
12-Mar-2017 06:00:00, NaN  
12-Mar-2017 07:00:00, NaN  
12-Mar-2017 08:00:00, NaN  
12-Mar-2017 09:00:00, NaN  
12-Mar-2017 10:00:00, NaN  
12-Mar-2017 11:00:00, NaN  
12-Mar-2017 12:00:00, NaN  
12-Mar-2017 13:00:00, NaN  
12-Mar-2017 14:00:00, NaN  
12-Mar-2017 15:00:00, NaN  
12-Mar-2017 16:00:00, NaN  
12-Mar-2017 17:00:00, NaN  
12-Mar-2017 18:00:00, NaN  
12-Mar-2017 19:00:00, NaN  
12-Mar-2017 20:00:00, NaN  
12-Mar-2017 21:00:00, NaN  
12-Mar-2017 22:00:00, NaN  
12-Mar-2017 23:00:00, NaN  
13-Mar-2017, NaN  
13-Mar-2017 01:00:00, NaN  
13-Mar-2017 02:00:00, NaN  
13-Mar-2017 03:00:00, NaN  
13-Mar-2017 04:00:00, NaN  
13-Mar-2017 05:00:00, NaN  
13-Mar-2017 06:00:00, NaN  
13-Mar-2017 07:00:00, NaN  
13-Mar-2017 08:00:00, NaN  
13-Mar-2017 09:00:00, NaN  
13-Mar-2017 10:00:00, NaN  
13-Mar-2017 11:00:00, NaN  
13-Mar-2017 12:00:00, NaN  
13-Mar-2017 13:00:00, NaN  
13-Mar-2017 14:00:00, NaN  
13-Mar-2017 15:00:00, NaN  
13-Mar-2017 16:00:00, NaN  
13-Mar-2017 17:00:00, NaN  
13-Mar-2017 18:00:00, NaN  
13-Mar-2017 19:00:00, NaN  
13-Mar-2017 20:00:00, NaN  
13-Mar-2017 21:00:00, NaN  
13-Mar-2017 22:00:00, NaN  
13-Mar-2017 23:00:00, NaN  
14-Mar-2017, NaN  
14-Mar-2017 01:00:00, NaN  
14-Mar-2017 02:00:00, NaN  
14-Mar-2017 03:00:00, NaN  
14-Mar-2017 04:00:00, NaN  
14-Mar-2017 05:00:00, NaN  
14-Mar-2017 06:00:00, NaN  
14-Mar-2017 07:00:00, NaN  
14-Mar-2017 08:00:00, NaN  
14-Mar-2017 09:00:00, NaN  
14-Mar-2017 10:00:00, NaN  
14-Mar-2017 11:00:00, NaN  
14-Mar-2017 12:00:00, NaN  
14-Mar-2017 13:00:00, NaN  
14-Mar-2017 14:00:00, NaN  
14-Mar-2017 15:00:00, NaN  
14-Mar-2017 16:00:00, NaN  
14-Mar-2017 17:00:00, NaN

14-Mar-2017 18:00:00, NaN  
14-Mar-2017 19:00:00, NaN  
14-Mar-2017 20:00:00, NaN  
14-Mar-2017 21:00:00, NaN  
14-Mar-2017 22:00:00, NaN  
14-Mar-2017 23:00:00, NaN  
15-Mar-2017, NaN  
15-Mar-2017 01:00:00, NaN  
15-Mar-2017 02:00:00, NaN  
15-Mar-2017 03:00:00, NaN  
15-Mar-2017 04:00:00, NaN  
15-Mar-2017 05:00:00, NaN  
15-Mar-2017 06:00:00, NaN  
15-Mar-2017 07:00:00, NaN  
15-Mar-2017 08:00:00, NaN  
15-Mar-2017 09:00:00, NaN  
15-Mar-2017 10:00:00, NaN  
15-Mar-2017 11:00:00, NaN  
15-Mar-2017 12:00:00, NaN  
15-Mar-2017 13:00:00, NaN  
15-Mar-2017 14:00:00, NaN  
15-Mar-2017 15:00:00, NaN  
15-Mar-2017 16:00:00, NaN  
15-Mar-2017 17:00:00, NaN  
15-Mar-2017 18:00:00, NaN  
15-Mar-2017 19:00:00, NaN  
15-Mar-2017 20:00:00, NaN  
15-Mar-2017 21:00:00, NaN  
15-Mar-2017 22:00:00, NaN  
15-Mar-2017 23:00:00, NaN  
16-Mar-2017, NaN  
16-Mar-2017 01:00:00, NaN  
16-Mar-2017 02:00:00, NaN  
16-Mar-2017 03:00:00, NaN  
16-Mar-2017 04:00:00, NaN  
16-Mar-2017 05:00:00, NaN  
16-Mar-2017 06:00:00, NaN  
16-Mar-2017 07:00:00, NaN  
16-Mar-2017 08:00:00, NaN  
16-Mar-2017 09:00:00, NaN  
16-Mar-2017 10:00:00, NaN  
16-Mar-2017 11:00:00, NaN  
16-Mar-2017 12:00:00, NaN  
16-Mar-2017 13:00:00, NaN  
16-Mar-2017 14:00:00, NaN  
16-Mar-2017 15:00:00, NaN  
16-Mar-2017 16:00:00, NaN  
16-Mar-2017 17:00:00, NaN  
16-Mar-2017 18:00:00, NaN  
16-Mar-2017 19:00:00, NaN  
16-Mar-2017 20:00:00, NaN  
16-Mar-2017 21:00:00, NaN  
16-Mar-2017 22:00:00, NaN  
16-Mar-2017 23:00:00, NaN  
17-Mar-2017, NaN  
17-Mar-2017 01:00:00, NaN  
17-Mar-2017 02:00:00, NaN  
17-Mar-2017 03:00:00, NaN  
17-Mar-2017 04:00:00, NaN  
17-Mar-2017 05:00:00, NaN  
17-Mar-2017 06:00:00, NaN  
17-Mar-2017 07:00:00, NaN  
17-Mar-2017 08:00:00, NaN  
17-Mar-2017 09:00:00, NaN

17-Mar-2017 10:00:00, NaN  
17-Mar-2017 11:00:00, NaN  
17-Mar-2017 12:00:00, NaN  
17-Mar-2017 13:00:00, NaN  
17-Mar-2017 14:00:00, NaN  
17-Mar-2017 15:00:00, NaN  
17-Mar-2017 16:00:00, NaN  
17-Mar-2017 17:00:00, NaN  
17-Mar-2017 18:00:00, NaN  
17-Mar-2017 19:00:00, NaN  
17-Mar-2017 20:00:00, NaN  
17-Mar-2017 21:00:00, NaN  
17-Mar-2017 22:00:00, NaN  
17-Mar-2017 23:00:00, NaN  
18-Mar-2017, NaN  
18-Mar-2017 01:00:00, NaN  
18-Mar-2017 02:00:00, NaN  
18-Mar-2017 03:00:00, NaN  
18-Mar-2017 04:00:00, NaN  
18-Mar-2017 05:00:00, NaN  
18-Mar-2017 06:00:00, NaN  
18-Mar-2017 07:00:00, NaN  
18-Mar-2017 08:00:00, NaN  
18-Mar-2017 09:00:00, NaN  
18-Mar-2017 10:00:00, NaN  
18-Mar-2017 11:00:00, NaN  
18-Mar-2017 12:00:00, NaN  
18-Mar-2017 13:00:00, NaN  
18-Mar-2017 14:00:00, NaN  
18-Mar-2017 15:00:00, NaN  
18-Mar-2017 16:00:00, NaN  
18-Mar-2017 17:00:00, NaN  
18-Mar-2017 18:00:00, NaN  
18-Mar-2017 19:00:00, NaN  
18-Mar-2017 20:00:00, NaN  
18-Mar-2017 21:00:00, NaN  
18-Mar-2017 22:00:00, NaN  
18-Mar-2017 23:00:00, NaN  
19-Mar-2017, NaN  
19-Mar-2017 01:00:00, NaN  
19-Mar-2017 02:00:00, NaN  
19-Mar-2017 03:00:00, NaN  
19-Mar-2017 04:00:00, NaN  
19-Mar-2017 05:00:00, NaN  
19-Mar-2017 06:00:00, NaN  
19-Mar-2017 07:00:00, NaN  
19-Mar-2017 08:00:00, NaN  
19-Mar-2017 09:00:00, NaN  
19-Mar-2017 10:00:00, NaN  
19-Mar-2017 11:00:00, NaN  
19-Mar-2017 12:00:00, NaN  
19-Mar-2017 13:00:00, NaN  
19-Mar-2017 14:00:00, NaN  
19-Mar-2017 15:00:00, NaN  
19-Mar-2017 16:00:00, NaN  
19-Mar-2017 17:00:00, NaN  
19-Mar-2017 18:00:00, NaN  
19-Mar-2017 19:00:00, NaN  
19-Mar-2017 20:00:00, NaN  
19-Mar-2017 21:00:00, NaN  
19-Mar-2017 22:00:00, NaN  
19-Mar-2017 23:00:00, NaN  
20-Mar-2017, NaN  
20-Mar-2017 01:00:00, NaN



20-Mar-2017 02:00:00, NaN  
20-Mar-2017 03:00:00, NaN  
20-Mar-2017 04:00:00, NaN  
20-Mar-2017 05:00:00, NaN  
20-Mar-2017 06:00:00, NaN  
20-Mar-2017 07:00:00, NaN  
20-Mar-2017 08:00:00, NaN  
20-Mar-2017 09:00:00, NaN  
20-Mar-2017 10:00:00, NaN  
20-Mar-2017 11:00:00, NaN  
20-Mar-2017 12:00:00, NaN  
20-Mar-2017 13:00:00, NaN  
20-Mar-2017 14:00:00, NaN  
20-Mar-2017 15:00:00, NaN  
20-Mar-2017 16:00:00, NaN  
20-Mar-2017 17:00:00, NaN  
20-Mar-2017 18:00:00, NaN  
20-Mar-2017 19:00:00, NaN  
20-Mar-2017 20:00:00, NaN  
20-Mar-2017 21:00:00, NaN  
20-Mar-2017 22:00:00, NaN  
20-Mar-2017 23:00:00, NaN  
21-Mar-2017, NaN  
21-Mar-2017 01:00:00, NaN  
21-Mar-2017 02:00:00, NaN  
21-Mar-2017 03:00:00, NaN  
21-Mar-2017 04:00:00, NaN  
21-Mar-2017 05:00:00, NaN  
21-Mar-2017 06:00:00, NaN  
21-Mar-2017 07:00:00, NaN  
21-Mar-2017 08:00:00, NaN  
21-Mar-2017 09:00:00, NaN  
21-Mar-2017 10:00:00, NaN  
21-Mar-2017 11:00:00, NaN  
21-Mar-2017 12:00:00, NaN  
21-Mar-2017 13:00:00, NaN  
21-Mar-2017 14:00:00, NaN  
21-Mar-2017 15:00:00, NaN  
21-Mar-2017 16:00:00, NaN  
21-Mar-2017 17:00:00, NaN  
21-Mar-2017 18:00:00, NaN  
21-Mar-2017 19:00:00, NaN  
21-Mar-2017 20:00:00, NaN  
21-Mar-2017 21:00:00, NaN  
21-Mar-2017 22:00:00, NaN  
21-Mar-2017 23:00:00, NaN  
22-Mar-2017, NaN  
22-Mar-2017 01:00:00, NaN  
22-Mar-2017 02:00:00, NaN  
22-Mar-2017 03:00:00, NaN  
22-Mar-2017 04:00:00, NaN  
22-Mar-2017 05:00:00, NaN  
22-Mar-2017 06:00:00, NaN  
22-Mar-2017 07:00:00, NaN  
22-Mar-2017 08:00:00, NaN  
22-Mar-2017 09:00:00, NaN  
22-Mar-2017 10:00:00, NaN  
22-Mar-2017 11:00:00, NaN  
22-Mar-2017 12:00:00, NaN  
22-Mar-2017 13:00:00, NaN  
22-Mar-2017 14:00:00, NaN  
22-Mar-2017 15:00:00, NaN  
22-Mar-2017 16:00:00, NaN  
22-Mar-2017 17:00:00, NaN

22-Mar-2017 18:00:00, NaN  
22-Mar-2017 19:00:00, NaN  
22-Mar-2017 20:00:00, NaN  
22-Mar-2017 21:00:00, NaN  
22-Mar-2017 22:00:00, NaN  
22-Mar-2017 23:00:00, NaN  
23-Mar-2017, NaN  
23-Mar-2017 01:00:00, NaN  
23-Mar-2017 02:00:00, NaN  
23-Mar-2017 03:00:00, NaN  
23-Mar-2017 04:00:00, NaN  
23-Mar-2017 05:00:00, NaN  
23-Mar-2017 06:00:00, NaN  
23-Mar-2017 07:00:00, NaN  
23-Mar-2017 08:00:00, NaN  
23-Mar-2017 09:00:00, NaN  
23-Mar-2017 10:00:00, NaN  
23-Mar-2017 11:00:00, NaN  
23-Mar-2017 12:00:00, NaN  
23-Mar-2017 13:00:00, NaN  
23-Mar-2017 14:00:00, NaN  
23-Mar-2017 15:00:00, NaN  
23-Mar-2017 16:00:00, NaN  
23-Mar-2017 17:00:00, NaN  
23-Mar-2017 18:00:00, NaN  
23-Mar-2017 19:00:00, NaN  
23-Mar-2017 20:00:00, NaN  
23-Mar-2017 21:00:00, NaN  
23-Mar-2017 22:00:00, NaN  
23-Mar-2017 23:00:00, NaN  
24-Mar-2017, NaN  
24-Mar-2017 01:00:00, NaN  
24-Mar-2017 02:00:00, NaN  
24-Mar-2017 03:00:00, NaN  
24-Mar-2017 04:00:00, NaN  
24-Mar-2017 05:00:00, NaN  
24-Mar-2017 06:00:00, NaN  
24-Mar-2017 07:00:00, NaN  
24-Mar-2017 08:00:00, NaN  
24-Mar-2017 09:00:00, NaN  
24-Mar-2017 10:00:00, NaN  
24-Mar-2017 11:00:00, NaN  
24-Mar-2017 12:00:00, NaN  
24-Mar-2017 13:00:00, NaN  
24-Mar-2017 14:00:00, NaN  
24-Mar-2017 15:00:00, NaN  
24-Mar-2017 16:00:00, NaN  
24-Mar-2017 17:00:00, NaN  
24-Mar-2017 18:00:00, NaN  
24-Mar-2017 19:00:00, NaN  
24-Mar-2017 20:00:00, NaN  
24-Mar-2017 21:00:00, NaN  
24-Mar-2017 22:00:00, NaN  
24-Mar-2017 23:00:00, NaN  
25-Mar-2017, NaN  
25-Mar-2017 01:00:00, NaN  
25-Mar-2017 02:00:00, NaN  
25-Mar-2017 03:00:00, NaN  
25-Mar-2017 04:00:00, NaN  
25-Mar-2017 05:00:00, NaN  
25-Mar-2017 06:00:00, NaN  
25-Mar-2017 07:00:00, NaN  
25-Mar-2017 08:00:00, NaN  
25-Mar-2017 09:00:00, NaN

25-Mar-2017 10:00:00, NaN  
25-Mar-2017 11:00:00, NaN  
25-Mar-2017 12:00:00, NaN  
25-Mar-2017 13:00:00, NaN  
25-Mar-2017 14:00:00, NaN  
25-Mar-2017 15:00:00, NaN  
25-Mar-2017 16:00:00, NaN  
25-Mar-2017 17:00:00, NaN  
25-Mar-2017 18:00:00, NaN  
25-Mar-2017 19:00:00, NaN  
25-Mar-2017 20:00:00, NaN  
25-Mar-2017 21:00:00, NaN  
25-Mar-2017 22:00:00, NaN  
25-Mar-2017 23:00:00, NaN  
26-Mar-2017, NaN  
26-Mar-2017 01:00:00, NaN  
26-Mar-2017 02:00:00, NaN  
26-Mar-2017 03:00:00, NaN  
26-Mar-2017 04:00:00, NaN  
26-Mar-2017 05:00:00, NaN  
26-Mar-2017 06:00:00, NaN  
26-Mar-2017 07:00:00, NaN  
26-Mar-2017 08:00:00, NaN  
26-Mar-2017 09:00:00, NaN  
26-Mar-2017 10:00:00, NaN  
26-Mar-2017 11:00:00, NaN  
26-Mar-2017 12:00:00, NaN  
26-Mar-2017 13:00:00, NaN  
26-Mar-2017 14:00:00, NaN  
26-Mar-2017 15:00:00, NaN  
26-Mar-2017 16:00:00, NaN  
26-Mar-2017 17:00:00, NaN  
26-Mar-2017 18:00:00, NaN  
26-Mar-2017 19:00:00, NaN  
26-Mar-2017 20:00:00, NaN  
26-Mar-2017 21:00:00, NaN  
26-Mar-2017 22:00:00, NaN  
26-Mar-2017 23:00:00, NaN  
27-Mar-2017, NaN  
27-Mar-2017 01:00:00, NaN  
27-Mar-2017 02:00:00, NaN  
27-Mar-2017 03:00:00, NaN  
27-Mar-2017 04:00:00, NaN  
27-Mar-2017 05:00:00, NaN  
27-Mar-2017 06:00:00, NaN  
27-Mar-2017 07:00:00, NaN  
27-Mar-2017 08:00:00, NaN  
27-Mar-2017 09:00:00, NaN  
27-Mar-2017 10:00:00, NaN  
27-Mar-2017 11:00:00, NaN  
27-Mar-2017 12:00:00, NaN  
27-Mar-2017 13:00:00, NaN  
27-Mar-2017 14:00:00, NaN  
27-Mar-2017 15:00:00, NaN  
27-Mar-2017 16:00:00, NaN  
27-Mar-2017 17:00:00, NaN  
27-Mar-2017 18:00:00, NaN  
27-Mar-2017 19:00:00, NaN  
27-Mar-2017 20:00:00, NaN  
27-Mar-2017 21:00:00, NaN  
27-Mar-2017 22:00:00, NaN  
27-Mar-2017 23:00:00, NaN  
28-Mar-2017, NaN  
28-Mar-2017 01:00:00, NaN

28-Mar-2017 02:00:00, NaN  
28-Mar-2017 03:00:00, NaN  
28-Mar-2017 04:00:00, NaN  
28-Mar-2017 05:00:00, NaN  
28-Mar-2017 06:00:00, NaN  
28-Mar-2017 07:00:00, NaN  
28-Mar-2017 08:00:00, NaN  
28-Mar-2017 09:00:00, NaN  
28-Mar-2017 10:00:00, NaN  
28-Mar-2017 11:00:00, NaN  
28-Mar-2017 12:00:00, NaN  
28-Mar-2017 13:00:00, NaN  
28-Mar-2017 14:00:00, NaN  
28-Mar-2017 15:00:00, NaN  
28-Mar-2017 16:00:00, NaN  
28-Mar-2017 17:00:00, NaN  
28-Mar-2017 18:00:00, NaN  
28-Mar-2017 19:00:00, NaN  
28-Mar-2017 20:00:00, NaN  
28-Mar-2017 21:00:00, NaN  
28-Mar-2017 22:00:00, NaN  
28-Mar-2017 23:00:00, NaN  
29-Mar-2017, NaN  
29-Mar-2017 01:00:00, NaN  
29-Mar-2017 02:00:00, NaN  
29-Mar-2017 03:00:00, NaN  
29-Mar-2017 04:00:00, NaN  
29-Mar-2017 05:00:00, NaN  
29-Mar-2017 06:00:00, NaN  
29-Mar-2017 07:00:00, NaN  
29-Mar-2017 08:00:00, NaN  
29-Mar-2017 09:00:00, NaN  
29-Mar-2017 10:00:00, NaN  
29-Mar-2017 11:00:00, NaN  
29-Mar-2017 12:00:00, NaN  
29-Mar-2017 13:00:00, NaN  
29-Mar-2017 14:00:00, NaN  
29-Mar-2017 15:00:00, NaN  
29-Mar-2017 16:00:00, NaN  
29-Mar-2017 17:00:00, NaN  
29-Mar-2017 18:00:00, NaN  
29-Mar-2017 19:00:00, NaN  
29-Mar-2017 20:00:00, NaN  
29-Mar-2017 21:00:00, NaN  
29-Mar-2017 22:00:00, NaN  
29-Mar-2017 23:00:00, NaN  
30-Mar-2017, NaN  
30-Mar-2017 01:00:00, NaN  
30-Mar-2017 02:00:00, NaN  
30-Mar-2017 03:00:00, NaN  
30-Mar-2017 04:00:00, NaN  
30-Mar-2017 05:00:00, NaN  
30-Mar-2017 06:00:00, NaN  
30-Mar-2017 07:00:00, NaN  
30-Mar-2017 08:00:00, NaN  
30-Mar-2017 09:00:00, NaN  
30-Mar-2017 10:00:00, NaN  
30-Mar-2017 11:00:00, NaN  
30-Mar-2017 12:00:00, NaN  
30-Mar-2017 13:00:00, NaN  
30-Mar-2017 14:00:00, NaN  
30-Mar-2017 15:00:00, NaN  
30-Mar-2017 16:00:00, NaN  
30-Mar-2017 17:00:00, NaN

30-Mar-2017 18:00:00, NaN  
30-Mar-2017 19:00:00, NaN  
30-Mar-2017 20:00:00, NaN  
30-Mar-2017 21:00:00, NaN  
30-Mar-2017 22:00:00, NaN  
30-Mar-2017 23:00:00, NaN  
31-Mar-2017, NaN  
31-Mar-2017 01:00:00, NaN  
31-Mar-2017 02:00:00, NaN  
31-Mar-2017 03:00:00, NaN  
31-Mar-2017 04:00:00, NaN  
31-Mar-2017 05:00:00, NaN  
31-Mar-2017 06:00:00, NaN  
31-Mar-2017 07:00:00, NaN  
31-Mar-2017 08:00:00, NaN  
31-Mar-2017 09:00:00, NaN  
31-Mar-2017 10:00:00, NaN  
31-Mar-2017 11:00:00, NaN  
31-Mar-2017 12:00:00, NaN  
31-Mar-2017 13:00:00, NaN  
31-Mar-2017 14:00:00, NaN  
31-Mar-2017 15:00:00, NaN  
31-Mar-2017 16:00:00, NaN  
31-Mar-2017 17:00:00, NaN  
31-Mar-2017 18:00:00, NaN  
31-Mar-2017 19:00:00, NaN  
31-Mar-2017 20:00:00, NaN  
31-Mar-2017 21:00:00, NaN  
31-Mar-2017 22:00:00, NaN  
31-Mar-2017 23:00:00, NaN  
01-Apr-2017, NaN  
01-Apr-2017 01:00:00, NaN  
01-Apr-2017 02:00:00, NaN  
01-Apr-2017 03:00:00, NaN  
01-Apr-2017 04:00:00, NaN  
01-Apr-2017 05:00:00, NaN  
01-Apr-2017 06:00:00, NaN  
01-Apr-2017 07:00:00, NaN  
01-Apr-2017 08:00:00, NaN  
01-Apr-2017 09:00:00, NaN  
01-Apr-2017 10:00:00, NaN  
01-Apr-2017 11:00:00, NaN  
01-Apr-2017 12:00:00, NaN  
01-Apr-2017 13:00:00, NaN  
01-Apr-2017 14:00:00, NaN  
01-Apr-2017 15:00:00, NaN  
01-Apr-2017 16:00:00, NaN  
01-Apr-2017 17:00:00, NaN  
01-Apr-2017 18:00:00, NaN  
01-Apr-2017 19:00:00, NaN  
01-Apr-2017 20:00:00, NaN  
01-Apr-2017 21:00:00, NaN  
01-Apr-2017 22:00:00, NaN  
01-Apr-2017 23:00:00, NaN  
02-Apr-2017, NaN  
02-Apr-2017 01:00:00, NaN  
02-Apr-2017 02:00:00, NaN  
02-Apr-2017 03:00:00, NaN  
02-Apr-2017 04:00:00, NaN  
02-Apr-2017 05:00:00, NaN  
02-Apr-2017 06:00:00, NaN  
02-Apr-2017 07:00:00, NaN  
02-Apr-2017 08:00:00, NaN  
02-Apr-2017 09:00:00, NaN

02-Apr-2017 10:00:00, NaN  
02-Apr-2017 11:00:00, NaN  
02-Apr-2017 12:00:00, NaN  
02-Apr-2017 13:00:00, NaN  
02-Apr-2017 14:00:00, NaN  
02-Apr-2017 15:00:00, NaN  
02-Apr-2017 16:00:00, NaN  
02-Apr-2017 17:00:00, NaN  
02-Apr-2017 18:00:00, NaN  
02-Apr-2017 19:00:00, NaN  
02-Apr-2017 20:00:00, NaN  
02-Apr-2017 21:00:00, NaN  
02-Apr-2017 22:00:00, NaN  
02-Apr-2017 23:00:00, NaN  
03-Apr-2017, NaN  
03-Apr-2017 01:00:00, NaN  
03-Apr-2017 02:00:00, NaN  
03-Apr-2017 03:00:00, NaN  
03-Apr-2017 04:00:00, NaN  
03-Apr-2017 05:00:00, NaN  
03-Apr-2017 06:00:00, NaN  
03-Apr-2017 07:00:00, NaN  
03-Apr-2017 08:00:00, NaN  
03-Apr-2017 09:00:00, NaN  
03-Apr-2017 10:00:00, NaN  
03-Apr-2017 11:00:00, NaN  
03-Apr-2017 12:00:00, NaN  
03-Apr-2017 13:00:00, NaN  
03-Apr-2017 14:00:00, NaN  
03-Apr-2017 15:00:00, NaN  
03-Apr-2017 16:00:00, NaN  
03-Apr-2017 17:00:00, NaN  
03-Apr-2017 18:00:00, NaN  
03-Apr-2017 19:00:00, NaN  
03-Apr-2017 20:00:00, NaN  
03-Apr-2017 21:00:00, NaN  
03-Apr-2017 22:00:00, NaN  
03-Apr-2017 23:00:00, NaN  
04-Apr-2017, NaN  
04-Apr-2017 01:00:00, NaN  
04-Apr-2017 02:00:00, NaN  
04-Apr-2017 03:00:00, NaN  
04-Apr-2017 04:00:00, NaN  
04-Apr-2017 05:00:00, NaN  
04-Apr-2017 06:00:00, NaN  
04-Apr-2017 07:00:00, NaN  
04-Apr-2017 08:00:00, NaN  
04-Apr-2017 09:00:00, NaN  
04-Apr-2017 10:00:00, NaN  
04-Apr-2017 11:00:00, NaN  
04-Apr-2017 12:00:00, NaN  
04-Apr-2017 13:00:00, NaN  
04-Apr-2017 14:00:00, NaN  
04-Apr-2017 15:00:00, NaN  
04-Apr-2017 16:00:00, NaN  
04-Apr-2017 17:00:00, NaN  
04-Apr-2017 18:00:00, NaN  
04-Apr-2017 19:00:00, NaN  
04-Apr-2017 20:00:00, NaN  
04-Apr-2017 21:00:00, NaN  
04-Apr-2017 22:00:00, NaN  
04-Apr-2017 23:00:00, NaN  
05-Apr-2017, NaN  
05-Apr-2017 01:00:00, NaN

05-Apr-2017 02:00:00, NaN  
05-Apr-2017 03:00:00, NaN  
05-Apr-2017 04:00:00, NaN  
05-Apr-2017 05:00:00, NaN  
05-Apr-2017 06:00:00, NaN  
05-Apr-2017 07:00:00, NaN  
05-Apr-2017 08:00:00, NaN  
05-Apr-2017 09:00:00, NaN  
05-Apr-2017 10:00:00, NaN  
05-Apr-2017 11:00:00, NaN  
05-Apr-2017 12:00:00, NaN  
05-Apr-2017 13:00:00, NaN  
05-Apr-2017 14:00:00, NaN  
05-Apr-2017 15:00:00, NaN  
05-Apr-2017 16:00:00, NaN  
05-Apr-2017 17:00:00, NaN  
05-Apr-2017 18:00:00, NaN  
05-Apr-2017 19:00:00, NaN  
05-Apr-2017 20:00:00, NaN  
05-Apr-2017 21:00:00, NaN  
05-Apr-2017 22:00:00, NaN  
05-Apr-2017 23:00:00, NaN  
06-Apr-2017, NaN  
06-Apr-2017 01:00:00, NaN  
06-Apr-2017 02:00:00, NaN  
06-Apr-2017 03:00:00, NaN  
06-Apr-2017 04:00:00, NaN  
06-Apr-2017 05:00:00, NaN  
06-Apr-2017 06:00:00, NaN  
06-Apr-2017 07:00:00, NaN  
06-Apr-2017 08:00:00, NaN  
06-Apr-2017 09:00:00, NaN  
06-Apr-2017 10:00:00, NaN  
06-Apr-2017 11:00:00, NaN  
06-Apr-2017 12:00:00, NaN  
06-Apr-2017 13:00:00, NaN  
06-Apr-2017 14:00:00, NaN  
06-Apr-2017 15:00:00, NaN  
06-Apr-2017 16:00:00, NaN  
06-Apr-2017 17:00:00, NaN  
06-Apr-2017 18:00:00, NaN  
06-Apr-2017 19:00:00, NaN  
06-Apr-2017 20:00:00, NaN  
06-Apr-2017 21:00:00, NaN  
06-Apr-2017 22:00:00, NaN  
06-Apr-2017 23:00:00, NaN  
07-Apr-2017, NaN  
07-Apr-2017 01:00:00, NaN  
07-Apr-2017 02:00:00, NaN  
07-Apr-2017 03:00:00, NaN  
07-Apr-2017 04:00:00, NaN  
07-Apr-2017 05:00:00, NaN  
07-Apr-2017 06:00:00, NaN  
07-Apr-2017 07:00:00, NaN  
07-Apr-2017 08:00:00, NaN  
07-Apr-2017 09:00:00, NaN  
07-Apr-2017 10:00:00, NaN  
07-Apr-2017 11:00:00, NaN  
07-Apr-2017 12:00:00, NaN  
07-Apr-2017 13:00:00, NaN  
07-Apr-2017 14:00:00, NaN  
07-Apr-2017 15:00:00, NaN  
07-Apr-2017 16:00:00, NaN  
07-Apr-2017 17:00:00, NaN

07-Apr-2017 18:00:00, NaN  
07-Apr-2017 19:00:00, NaN  
07-Apr-2017 20:00:00, NaN  
07-Apr-2017 21:00:00, NaN  
07-Apr-2017 22:00:00, NaN  
07-Apr-2017 23:00:00, NaN  
08-Apr-2017, NaN  
08-Apr-2017 01:00:00, NaN  
08-Apr-2017 02:00:00, NaN  
08-Apr-2017 03:00:00, NaN  
08-Apr-2017 04:00:00, NaN  
08-Apr-2017 05:00:00, NaN  
08-Apr-2017 06:00:00, NaN  
08-Apr-2017 07:00:00, NaN  
08-Apr-2017 08:00:00, NaN  
08-Apr-2017 09:00:00, NaN  
08-Apr-2017 10:00:00, NaN  
08-Apr-2017 11:00:00, NaN  
08-Apr-2017 12:00:00, NaN  
08-Apr-2017 13:00:00, NaN  
08-Apr-2017 14:00:00, NaN  
08-Apr-2017 15:00:00, NaN  
08-Apr-2017 16:00:00, NaN  
08-Apr-2017 17:00:00, NaN  
08-Apr-2017 18:00:00, NaN  
08-Apr-2017 19:00:00, NaN  
08-Apr-2017 20:00:00, NaN  
08-Apr-2017 21:00:00, NaN  
08-Apr-2017 22:00:00, NaN  
08-Apr-2017 23:00:00, NaN  
09-Apr-2017, NaN  
09-Apr-2017 01:00:00, NaN  
09-Apr-2017 02:00:00, NaN  
09-Apr-2017 03:00:00, NaN  
09-Apr-2017 04:00:00, NaN  
09-Apr-2017 05:00:00, NaN  
09-Apr-2017 06:00:00, NaN  
09-Apr-2017 07:00:00, NaN  
09-Apr-2017 08:00:00, NaN  
09-Apr-2017 09:00:00, NaN  
09-Apr-2017 10:00:00, NaN  
09-Apr-2017 11:00:00, NaN  
09-Apr-2017 12:00:00, NaN  
09-Apr-2017 13:00:00, NaN  
09-Apr-2017 14:00:00, NaN  
09-Apr-2017 15:00:00, NaN  
09-Apr-2017 16:00:00, NaN  
09-Apr-2017 17:00:00, NaN  
09-Apr-2017 18:00:00, NaN  
09-Apr-2017 19:00:00, NaN  
09-Apr-2017 20:00:00, NaN  
09-Apr-2017 21:00:00, NaN  
09-Apr-2017 22:00:00, NaN  
09-Apr-2017 23:00:00, NaN  
10-Apr-2017, NaN  
10-Apr-2017 01:00:00, NaN  
10-Apr-2017 02:00:00, NaN  
10-Apr-2017 03:00:00, NaN  
10-Apr-2017 04:00:00, NaN  
10-Apr-2017 05:00:00, NaN  
10-Apr-2017 06:00:00, NaN  
10-Apr-2017 07:00:00, NaN  
10-Apr-2017 08:00:00, NaN  
10-Apr-2017 09:00:00, NaN



10-Apr-2017 10:00:00, NaN  
10-Apr-2017 11:00:00, NaN  
10-Apr-2017 12:00:00, NaN  
10-Apr-2017 13:00:00, NaN  
10-Apr-2017 14:00:00, NaN  
10-Apr-2017 15:00:00, NaN  
10-Apr-2017 16:00:00, NaN  
10-Apr-2017 17:00:00, NaN  
10-Apr-2017 18:00:00, NaN  
10-Apr-2017 19:00:00, NaN  
10-Apr-2017 20:00:00, NaN  
10-Apr-2017 21:00:00, NaN  
10-Apr-2017 22:00:00, NaN  
10-Apr-2017 23:00:00, NaN  
11-Apr-2017, NaN  
11-Apr-2017 01:00:00, NaN  
11-Apr-2017 02:00:00, NaN  
11-Apr-2017 03:00:00, NaN  
11-Apr-2017 04:00:00, NaN  
11-Apr-2017 05:00:00, NaN  
11-Apr-2017 06:00:00, NaN  
11-Apr-2017 07:00:00, NaN  
11-Apr-2017 08:00:00, NaN  
11-Apr-2017 09:00:00, NaN  
11-Apr-2017 10:00:00, NaN  
11-Apr-2017 11:00:00, NaN  
11-Apr-2017 12:00:00, NaN  
11-Apr-2017 13:00:00, NaN  
11-Apr-2017 14:00:00, NaN  
11-Apr-2017 15:00:00, NaN  
11-Apr-2017 16:00:00, NaN  
11-Apr-2017 17:00:00, NaN  
11-Apr-2017 18:00:00, NaN  
11-Apr-2017 19:00:00, NaN  
11-Apr-2017 20:00:00, NaN  
11-Apr-2017 21:00:00, NaN  
11-Apr-2017 22:00:00, NaN  
11-Apr-2017 23:00:00, NaN  
12-Apr-2017, NaN  
12-Apr-2017 01:00:00, NaN  
12-Apr-2017 02:00:00, NaN  
12-Apr-2017 03:00:00, NaN  
12-Apr-2017 04:00:00, NaN  
12-Apr-2017 05:00:00, NaN  
12-Apr-2017 06:00:00, NaN  
12-Apr-2017 07:00:00, NaN  
12-Apr-2017 08:00:00, NaN  
12-Apr-2017 09:00:00, NaN  
12-Apr-2017 10:00:00, NaN  
12-Apr-2017 11:00:00, NaN  
12-Apr-2017 12:00:00, NaN  
12-Apr-2017 13:00:00, NaN  
12-Apr-2017 14:00:00, NaN  
12-Apr-2017 15:00:00, NaN  
12-Apr-2017 16:00:00, NaN  
12-Apr-2017 17:00:00, NaN  
12-Apr-2017 18:00:00, NaN  
12-Apr-2017 19:00:00, NaN  
12-Apr-2017 20:00:00, NaN  
12-Apr-2017 21:00:00, NaN  
12-Apr-2017 22:00:00, NaN  
12-Apr-2017 23:00:00, NaN  
13-Apr-2017, NaN  
13-Apr-2017 01:00:00, NaN

13-Apr-2017 02:00:00, NaN  
13-Apr-2017 03:00:00, NaN  
13-Apr-2017 04:00:00, NaN  
13-Apr-2017 05:00:00, NaN  
13-Apr-2017 06:00:00, NaN  
13-Apr-2017 07:00:00, NaN  
13-Apr-2017 08:00:00, NaN  
13-Apr-2017 09:00:00, NaN  
13-Apr-2017 10:00:00, NaN  
13-Apr-2017 11:00:00, NaN  
13-Apr-2017 12:00:00, NaN  
13-Apr-2017 13:00:00, NaN  
13-Apr-2017 14:00:00, NaN  
13-Apr-2017 15:00:00, NaN  
13-Apr-2017 16:00:00, NaN  
13-Apr-2017 17:00:00, NaN  
13-Apr-2017 18:00:00, NaN  
13-Apr-2017 19:00:00, NaN  
13-Apr-2017 20:00:00, NaN  
13-Apr-2017 21:00:00, NaN  
13-Apr-2017 22:00:00, NaN  
13-Apr-2017 23:00:00, NaN  
14-Apr-2017, NaN  
14-Apr-2017 01:00:00, NaN  
14-Apr-2017 02:00:00, NaN  
14-Apr-2017 03:00:00, NaN  
14-Apr-2017 04:00:00, NaN  
14-Apr-2017 05:00:00, NaN  
14-Apr-2017 06:00:00, NaN  
14-Apr-2017 07:00:00, NaN  
14-Apr-2017 08:00:00, NaN  
14-Apr-2017 09:00:00, NaN  
14-Apr-2017 10:00:00, NaN  
14-Apr-2017 11:00:00, NaN  
14-Apr-2017 12:00:00, NaN  
14-Apr-2017 13:00:00, NaN  
14-Apr-2017 14:00:00, NaN  
14-Apr-2017 15:00:00, NaN  
14-Apr-2017 16:00:00, NaN  
14-Apr-2017 17:00:00, NaN  
14-Apr-2017 18:00:00, NaN  
14-Apr-2017 19:00:00, NaN  
14-Apr-2017 20:00:00, NaN  
14-Apr-2017 21:00:00, NaN  
14-Apr-2017 22:00:00, NaN  
14-Apr-2017 23:00:00, NaN  
15-Apr-2017, NaN  
15-Apr-2017 01:00:00, NaN  
15-Apr-2017 02:00:00, NaN  
15-Apr-2017 03:00:00, NaN  
15-Apr-2017 04:00:00, NaN  
15-Apr-2017 05:00:00, NaN  
15-Apr-2017 06:00:00, NaN  
15-Apr-2017 07:00:00, NaN  
15-Apr-2017 08:00:00, NaN  
15-Apr-2017 09:00:00, NaN  
15-Apr-2017 10:00:00, NaN  
15-Apr-2017 11:00:00, NaN  
15-Apr-2017 12:00:00, NaN  
15-Apr-2017 13:00:00, NaN  
15-Apr-2017 14:00:00, NaN  
15-Apr-2017 15:00:00, NaN  
15-Apr-2017 16:00:00, NaN  
15-Apr-2017 17:00:00, NaN

15-Apr-2017 18:00:00, NaN  
15-Apr-2017 19:00:00, NaN  
15-Apr-2017 20:00:00, NaN  
15-Apr-2017 21:00:00, NaN  
15-Apr-2017 22:00:00, NaN  
15-Apr-2017 23:00:00, NaN  
16-Apr-2017, NaN  
16-Apr-2017 01:00:00, NaN  
16-Apr-2017 02:00:00, NaN  
16-Apr-2017 03:00:00, NaN  
16-Apr-2017 04:00:00, NaN  
16-Apr-2017 05:00:00, NaN  
16-Apr-2017 06:00:00, NaN  
16-Apr-2017 07:00:00, NaN  
16-Apr-2017 08:00:00, NaN  
16-Apr-2017 09:00:00, NaN  
16-Apr-2017 10:00:00, NaN  
16-Apr-2017 11:00:00, NaN  
16-Apr-2017 12:00:00, NaN  
16-Apr-2017 13:00:00, NaN  
16-Apr-2017 14:00:00, NaN  
16-Apr-2017 15:00:00, NaN  
16-Apr-2017 16:00:00, NaN  
16-Apr-2017 17:00:00, NaN  
16-Apr-2017 18:00:00, NaN  
16-Apr-2017 19:00:00, NaN  
16-Apr-2017 20:00:00, NaN  
16-Apr-2017 21:00:00, NaN  
16-Apr-2017 22:00:00, NaN  
16-Apr-2017 23:00:00, NaN  
17-Apr-2017, NaN  
17-Apr-2017 01:00:00, NaN  
17-Apr-2017 02:00:00, NaN  
17-Apr-2017 03:00:00, NaN  
17-Apr-2017 04:00:00, NaN  
17-Apr-2017 05:00:00, NaN  
17-Apr-2017 06:00:00, NaN  
17-Apr-2017 07:00:00, NaN  
17-Apr-2017 08:00:00, NaN  
17-Apr-2017 09:00:00, NaN  
17-Apr-2017 10:00:00, NaN  
17-Apr-2017 11:00:00, NaN  
17-Apr-2017 12:00:00, NaN  
17-Apr-2017 13:00:00, NaN  
17-Apr-2017 14:00:00, NaN  
17-Apr-2017 15:00:00, NaN  
17-Apr-2017 16:00:00, NaN  
17-Apr-2017 17:00:00, NaN  
17-Apr-2017 18:00:00, NaN  
17-Apr-2017 19:00:00, NaN  
17-Apr-2017 20:00:00, NaN  
17-Apr-2017 21:00:00, NaN  
17-Apr-2017 22:00:00, NaN  
17-Apr-2017 23:00:00, NaN  
18-Apr-2017, NaN  
18-Apr-2017 01:00:00, NaN  
18-Apr-2017 02:00:00, NaN  
18-Apr-2017 03:00:00, NaN  
18-Apr-2017 04:00:00, NaN  
18-Apr-2017 05:00:00, NaN  
18-Apr-2017 06:00:00, NaN  
18-Apr-2017 07:00:00, NaN  
18-Apr-2017 08:00:00, NaN  
18-Apr-2017 09:00:00, NaN

18-Apr-2017 10:00:00, NaN  
18-Apr-2017 11:00:00, NaN  
18-Apr-2017 12:00:00, NaN  
18-Apr-2017 13:00:00, NaN  
18-Apr-2017 14:00:00, NaN  
18-Apr-2017 15:00:00, NaN  
18-Apr-2017 16:00:00, NaN  
18-Apr-2017 17:00:00, NaN  
18-Apr-2017 18:00:00, NaN  
18-Apr-2017 19:00:00, NaN  
18-Apr-2017 20:00:00, NaN  
18-Apr-2017 21:00:00, NaN  
18-Apr-2017 22:00:00, NaN  
18-Apr-2017 23:00:00, NaN  
19-Apr-2017, NaN  
19-Apr-2017 01:00:00, NaN  
19-Apr-2017 02:00:00, NaN  
19-Apr-2017 03:00:00, NaN  
19-Apr-2017 04:00:00, NaN  
19-Apr-2017 05:00:00, NaN  
19-Apr-2017 06:00:00, NaN  
19-Apr-2017 07:00:00, NaN  
19-Apr-2017 08:00:00, NaN  
19-Apr-2017 09:00:00, NaN  
19-Apr-2017 10:00:00, NaN  
19-Apr-2017 11:00:00, NaN  
19-Apr-2017 12:00:00, NaN  
19-Apr-2017 13:00:00, NaN  
19-Apr-2017 14:00:00, NaN  
19-Apr-2017 15:00:00, NaN  
19-Apr-2017 16:00:00, NaN  
19-Apr-2017 17:00:00, NaN  
19-Apr-2017 18:00:00, NaN  
19-Apr-2017 19:00:00, NaN  
19-Apr-2017 20:00:00, NaN  
19-Apr-2017 21:00:00, NaN  
19-Apr-2017 22:00:00, NaN  
19-Apr-2017 23:00:00, NaN  
20-Apr-2017, NaN  
20-Apr-2017 01:00:00, NaN  
20-Apr-2017 02:00:00, NaN  
20-Apr-2017 03:00:00, NaN  
20-Apr-2017 04:00:00, NaN  
20-Apr-2017 05:00:00, NaN  
20-Apr-2017 06:00:00, NaN  
20-Apr-2017 07:00:00, NaN  
20-Apr-2017 08:00:00, NaN  
20-Apr-2017 09:00:00, NaN  
20-Apr-2017 10:00:00, NaN  
20-Apr-2017 11:00:00, NaN  
20-Apr-2017 12:00:00, NaN  
20-Apr-2017 13:00:00, NaN  
20-Apr-2017 14:00:00, NaN  
20-Apr-2017 15:00:00, NaN  
20-Apr-2017 16:00:00, NaN  
20-Apr-2017 17:00:00, NaN  
20-Apr-2017 18:00:00, NaN  
20-Apr-2017 19:00:00, NaN  
20-Apr-2017 20:00:00, NaN  
20-Apr-2017 21:00:00, NaN  
20-Apr-2017 22:00:00, NaN  
20-Apr-2017 23:00:00, NaN  
21-Apr-2017, NaN  
21-Apr-2017 01:00:00, NaN

21-Apr-2017 02:00:00, NaN  
21-Apr-2017 03:00:00, NaN  
21-Apr-2017 04:00:00, NaN  
21-Apr-2017 05:00:00, NaN  
21-Apr-2017 06:00:00, NaN  
21-Apr-2017 07:00:00, NaN  
21-Apr-2017 08:00:00, NaN  
21-Apr-2017 09:00:00, NaN  
21-Apr-2017 10:00:00, NaN  
21-Apr-2017 11:00:00, NaN  
21-Apr-2017 12:00:00, NaN  
21-Apr-2017 13:00:00, NaN  
21-Apr-2017 14:00:00, NaN  
21-Apr-2017 15:00:00, NaN  
21-Apr-2017 16:00:00, NaN  
21-Apr-2017 17:00:00, NaN  
21-Apr-2017 18:00:00, NaN  
21-Apr-2017 19:00:00, NaN  
21-Apr-2017 20:00:00, NaN  
21-Apr-2017 21:00:00, NaN  
21-Apr-2017 22:00:00, NaN  
21-Apr-2017 23:00:00, NaN  
22-Apr-2017, NaN  
22-Apr-2017 01:00:00, NaN  
22-Apr-2017 02:00:00, NaN  
22-Apr-2017 03:00:00, NaN  
22-Apr-2017 04:00:00, NaN  
22-Apr-2017 05:00:00, NaN  
22-Apr-2017 06:00:00, NaN  
22-Apr-2017 07:00:00, NaN  
22-Apr-2017 08:00:00, NaN  
22-Apr-2017 09:00:00, NaN  
22-Apr-2017 10:00:00, NaN  
22-Apr-2017 11:00:00, NaN  
22-Apr-2017 12:00:00, NaN  
22-Apr-2017 13:00:00, NaN  
22-Apr-2017 14:00:00, NaN  
22-Apr-2017 15:00:00, NaN  
22-Apr-2017 16:00:00, NaN  
22-Apr-2017 17:00:00, NaN  
22-Apr-2017 18:00:00, NaN  
22-Apr-2017 19:00:00, NaN  
22-Apr-2017 20:00:00, NaN  
22-Apr-2017 21:00:00, NaN  
22-Apr-2017 22:00:00, NaN  
22-Apr-2017 23:00:00, NaN  
23-Apr-2017, NaN  
23-Apr-2017 01:00:00, NaN  
23-Apr-2017 02:00:00, NaN  
23-Apr-2017 03:00:00, NaN  
23-Apr-2017 04:00:00, NaN  
23-Apr-2017 05:00:00, NaN  
23-Apr-2017 06:00:00, NaN  
23-Apr-2017 07:00:00, NaN  
23-Apr-2017 08:00:00, NaN  
23-Apr-2017 09:00:00, NaN  
23-Apr-2017 10:00:00, NaN  
23-Apr-2017 11:00:00, NaN  
23-Apr-2017 12:00:00, NaN  
23-Apr-2017 13:00:00, NaN  
23-Apr-2017 14:00:00, NaN  
23-Apr-2017 15:00:00, NaN  
23-Apr-2017 16:00:00, NaN  
23-Apr-2017 17:00:00, NaN

23-Apr-2017 18:00:00, NaN  
23-Apr-2017 19:00:00, NaN  
23-Apr-2017 20:00:00, NaN  
23-Apr-2017 21:00:00, NaN  
23-Apr-2017 22:00:00, NaN  
23-Apr-2017 23:00:00, NaN  
24-Apr-2017, NaN  
24-Apr-2017 01:00:00, NaN  
24-Apr-2017 02:00:00, NaN  
24-Apr-2017 03:00:00, NaN  
24-Apr-2017 04:00:00, NaN  
24-Apr-2017 05:00:00, NaN  
24-Apr-2017 06:00:00, NaN  
24-Apr-2017 07:00:00, NaN  
24-Apr-2017 08:00:00, NaN  
24-Apr-2017 09:00:00, NaN  
24-Apr-2017 10:00:00, NaN  
24-Apr-2017 11:00:00, NaN  
24-Apr-2017 12:00:00, NaN  
24-Apr-2017 13:00:00, NaN  
24-Apr-2017 14:00:00, NaN  
24-Apr-2017 15:00:00, NaN  
24-Apr-2017 16:00:00, NaN  
24-Apr-2017 17:00:00, NaN  
24-Apr-2017 18:00:00, NaN  
24-Apr-2017 19:00:00, NaN  
24-Apr-2017 20:00:00, NaN  
24-Apr-2017 21:00:00, NaN  
24-Apr-2017 22:00:00, NaN  
24-Apr-2017 23:00:00, NaN  
25-Apr-2017, NaN  
25-Apr-2017 01:00:00, NaN  
25-Apr-2017 02:00:00, NaN  
25-Apr-2017 03:00:00, NaN  
25-Apr-2017 04:00:00, NaN  
25-Apr-2017 05:00:00, NaN  
25-Apr-2017 06:00:00, NaN  
25-Apr-2017 07:00:00, NaN  
25-Apr-2017 08:00:00, NaN  
25-Apr-2017 09:00:00, NaN  
25-Apr-2017 10:00:00, NaN  
25-Apr-2017 11:00:00, NaN  
25-Apr-2017 12:00:00, NaN  
25-Apr-2017 13:00:00, NaN  
25-Apr-2017 14:00:00, NaN  
25-Apr-2017 15:00:00, NaN  
25-Apr-2017 16:00:00, NaN  
25-Apr-2017 17:00:00, NaN  
25-Apr-2017 18:00:00, NaN  
25-Apr-2017 19:00:00, NaN  
25-Apr-2017 20:00:00, NaN  
25-Apr-2017 21:00:00, NaN  
25-Apr-2017 22:00:00, NaN  
25-Apr-2017 23:00:00, NaN  
26-Apr-2017, NaN  
26-Apr-2017 01:00:00, NaN  
26-Apr-2017 02:00:00, NaN  
26-Apr-2017 03:00:00, NaN  
26-Apr-2017 04:00:00, NaN  
26-Apr-2017 05:00:00, NaN  
26-Apr-2017 06:00:00, NaN  
26-Apr-2017 07:00:00, NaN  
26-Apr-2017 08:00:00, NaN  
26-Apr-2017 09:00:00, NaN

26-Apr-2017 10:00:00, NaN  
26-Apr-2017 11:00:00, NaN  
26-Apr-2017 12:00:00, NaN  
26-Apr-2017 13:00:00, NaN  
26-Apr-2017 14:00:00, NaN  
26-Apr-2017 15:00:00, NaN  
26-Apr-2017 16:00:00, NaN  
26-Apr-2017 17:00:00, NaN  
26-Apr-2017 18:00:00, NaN  
26-Apr-2017 19:00:00, NaN  
26-Apr-2017 20:00:00, NaN  
26-Apr-2017 21:00:00, NaN  
26-Apr-2017 22:00:00, NaN  
26-Apr-2017 23:00:00, NaN  
27-Apr-2017, NaN  
27-Apr-2017 01:00:00, NaN  
27-Apr-2017 02:00:00, NaN  
27-Apr-2017 03:00:00, NaN  
27-Apr-2017 04:00:00, NaN  
27-Apr-2017 05:00:00, NaN  
27-Apr-2017 06:00:00, NaN  
27-Apr-2017 08:00:00, NaN  
27-Apr-2017 09:00:00, NaN  
27-Apr-2017 10:00:00, NaN  
27-Apr-2017 11:00:00, NaN  
27-Apr-2017 12:00:00, NaN  
27-Apr-2017 13:00:00, NaN  
27-Apr-2017 14:00:00, NaN  
27-Apr-2017 15:00:00, NaN  
27-Apr-2017 16:00:00, NaN  
27-Apr-2017 17:00:00, NaN  
27-Apr-2017 18:00:00, NaN  
27-Apr-2017 19:00:00, NaN  
27-Apr-2017 20:00:00, NaN  
27-Apr-2017 21:00:00, NaN  
27-Apr-2017 22:00:00, NaN  
27-Apr-2017 23:00:00, NaN  
28-Apr-2017, NaN  
28-Apr-2017 01:00:00, NaN  
28-Apr-2017 02:00:00, NaN  
28-Apr-2017 03:00:00, NaN  
28-Apr-2017 04:00:00, NaN  
28-Apr-2017 05:00:00, NaN  
28-Apr-2017 06:00:00, NaN  
28-Apr-2017 07:00:00, NaN  
28-Apr-2017 08:00:00, NaN  
28-Apr-2017 09:00:00, NaN  
28-Apr-2017 10:00:00, NaN  
28-Apr-2017 11:00:00, NaN  
28-Apr-2017 12:00:00, NaN  
28-Apr-2017 13:00:00, NaN  
28-Apr-2017 14:00:00, NaN  
28-Apr-2017 15:00:00, NaN  
28-Apr-2017 16:00:00, NaN  
28-Apr-2017 17:00:00, NaN  
28-Apr-2017 18:00:00, NaN  
28-Apr-2017 19:00:00, NaN  
28-Apr-2017 20:00:00, NaN  
28-Apr-2017 21:00:00, NaN  
28-Apr-2017 22:00:00, NaN  
28-Apr-2017 23:00:00, NaN  
29-Apr-2017, NaN  
29-Apr-2017 01:00:00, NaN  
29-Apr-2017 02:00:00, NaN

29-Apr-2017 03:00:00, NaN  
29-Apr-2017 04:00:00, NaN  
29-Apr-2017 05:00:00, NaN  
29-Apr-2017 06:00:00, NaN  
29-Apr-2017 07:00:00, NaN  
29-Apr-2017 08:00:00, NaN  
29-Apr-2017 09:00:00, NaN  
29-Apr-2017 10:00:00, NaN  
29-Apr-2017 11:00:00, NaN  
29-Apr-2017 12:00:00, NaN  
29-Apr-2017 13:00:00, NaN  
29-Apr-2017 14:00:00, NaN  
29-Apr-2017 15:00:00, NaN  
29-Apr-2017 16:00:00, NaN  
29-Apr-2017 17:00:00, NaN  
29-Apr-2017 18:00:00, NaN  
29-Apr-2017 19:00:00, NaN  
29-Apr-2017 20:00:00, NaN  
29-Apr-2017 21:00:00, NaN  
29-Apr-2017 22:00:00, NaN  
29-Apr-2017 23:00:00, NaN  
30-Apr-2017, NaN  
30-Apr-2017 01:00:00, NaN  
30-Apr-2017 02:00:00, NaN  
30-Apr-2017 03:00:00, NaN  
30-Apr-2017 04:00:00, NaN  
30-Apr-2017 05:00:00, NaN  
30-Apr-2017 06:00:00, NaN  
30-Apr-2017 07:00:00, NaN  
30-Apr-2017 08:00:00, NaN  
30-Apr-2017 09:00:00, NaN  
30-Apr-2017 10:00:00, NaN  
30-Apr-2017 11:00:00, NaN  
30-Apr-2017 12:00:00, NaN  
30-Apr-2017 13:00:00, NaN  
30-Apr-2017 14:00:00, NaN  
30-Apr-2017 15:00:00, NaN  
30-Apr-2017 16:00:00, NaN  
30-Apr-2017 17:00:00, NaN  
30-Apr-2017 18:00:00, NaN  
30-Apr-2017 19:00:00, NaN  
30-Apr-2017 20:00:00, NaN  
30-Apr-2017 21:00:00, NaN  
30-Apr-2017 22:00:00, NaN  
30-Apr-2017 23:00:00, NaN  
01-May-2017, NaN  
01-May-2017 01:00:00, NaN  
01-May-2017 02:00:00, NaN  
01-May-2017 03:00:00, NaN  
01-May-2017 04:00:00, NaN  
01-May-2017 05:00:00, NaN  
01-May-2017 06:00:00, NaN  
01-May-2017 07:00:00, NaN  
01-May-2017 08:00:00, NaN  
01-May-2017 09:00:00, NaN  
01-May-2017 10:00:00, NaN  
01-May-2017 11:00:00, NaN  
01-May-2017 12:00:00, NaN  
01-May-2017 13:00:00, NaN  
01-May-2017 14:00:00, NaN  
01-May-2017 15:00:00, NaN  
01-May-2017 16:00:00, NaN  
01-May-2017 17:00:00, NaN  
01-May-2017 18:00:00, NaN



01-May-2017 19:00:00, NaN  
01-May-2017 20:00:00, NaN  
01-May-2017 21:00:00, NaN  
01-May-2017 22:00:00, NaN  
01-May-2017 23:00:00, NaN  
02-May-2017, NaN  
02-May-2017 01:00:00, NaN  
02-May-2017 02:00:00, NaN  
02-May-2017 03:00:00, NaN  
02-May-2017 04:00:00, NaN  
02-May-2017 05:00:00, NaN  
02-May-2017 06:00:00, NaN  
02-May-2017 07:00:00, NaN  
02-May-2017 08:00:00, NaN  
02-May-2017 09:00:00, NaN  
02-May-2017 10:00:00, NaN  
02-May-2017 11:00:00, NaN  
02-May-2017 12:00:00, NaN  
02-May-2017 13:00:00, NaN  
02-May-2017 14:00:00, NaN  
02-May-2017 15:00:00, NaN  
02-May-2017 16:00:00, NaN  
02-May-2017 17:00:00, NaN  
02-May-2017 18:00:00, NaN  
02-May-2017 19:00:00, NaN  
02-May-2017 20:00:00, NaN  
02-May-2017 21:00:00, NaN  
02-May-2017 22:00:00, NaN  
02-May-2017 23:00:00, NaN  
03-May-2017, NaN  
03-May-2017 01:00:00, NaN  
03-May-2017 02:00:00, NaN  
03-May-2017 03:00:00, NaN  
03-May-2017 04:00:00, NaN  
03-May-2017 05:00:00, NaN  
03-May-2017 06:00:00, NaN  
03-May-2017 07:00:00, NaN  
03-May-2017 08:00:00, NaN  
03-May-2017 09:00:00, NaN  
03-May-2017 10:00:00, NaN  
03-May-2017 11:00:00, NaN  
03-May-2017 12:00:00, NaN  
03-May-2017 13:00:00, NaN  
03-May-2017 14:00:00, NaN  
03-May-2017 15:00:00, NaN  
03-May-2017 16:00:00, NaN  
03-May-2017 17:00:00, NaN  
03-May-2017 18:00:00, NaN  
03-May-2017 19:00:00, NaN  
03-May-2017 20:00:00, NaN  
03-May-2017 21:00:00, NaN  
03-May-2017 22:00:00, NaN  
03-May-2017 23:00:00, NaN  
04-May-2017, NaN  
04-May-2017 01:00:00, NaN  
04-May-2017 02:00:00, NaN  
04-May-2017 03:00:00, NaN  
04-May-2017 04:00:00, NaN  
04-May-2017 05:00:00, NaN  
04-May-2017 06:00:00, NaN  
04-May-2017 07:00:00, NaN  
04-May-2017 08:00:00, NaN  
04-May-2017 09:00:00, NaN  
04-May-2017 10:00:00, NaN

04-May-2017 11:00:00, NaN  
04-May-2017 12:00:00, NaN  
04-May-2017 13:00:00, NaN  
04-May-2017 14:00:00, NaN  
04-May-2017 15:00:00, NaN  
04-May-2017 16:00:00, NaN  
04-May-2017 17:00:00, NaN  
04-May-2017 18:00:00, NaN  
04-May-2017 19:00:00, NaN  
04-May-2017 20:00:00, NaN  
04-May-2017 21:00:00, NaN  
04-May-2017 22:00:00, NaN  
04-May-2017 23:00:00, NaN  
05-May-2017, NaN  
05-May-2017 01:00:00, NaN  
05-May-2017 02:00:00, NaN  
05-May-2017 03:00:00, NaN  
05-May-2017 04:00:00, NaN  
05-May-2017 05:00:00, NaN  
05-May-2017 06:00:00, NaN  
05-May-2017 07:00:00, NaN  
05-May-2017 08:00:00, NaN  
05-May-2017 09:00:00, NaN  
05-May-2017 10:00:00, NaN  
05-May-2017 11:00:00, NaN  
05-May-2017 12:00:00, NaN  
05-May-2017 13:00:00, NaN  
05-May-2017 14:00:00, NaN  
05-May-2017 15:00:00, NaN  
05-May-2017 16:00:00, NaN  
05-May-2017 17:00:00, NaN  
05-May-2017 18:00:00, NaN  
05-May-2017 19:00:00, NaN  
05-May-2017 20:00:00, NaN  
05-May-2017 21:00:00, NaN  
05-May-2017 22:00:00, NaN  
05-May-2017 23:00:00, NaN  
06-May-2017, NaN  
06-May-2017 01:00:00, NaN  
06-May-2017 02:00:00, NaN  
06-May-2017 03:00:00, NaN  
06-May-2017 04:00:00, NaN  
06-May-2017 05:00:00, NaN  
06-May-2017 06:00:00, NaN  
06-May-2017 07:00:00, NaN  
06-May-2017 08:00:00, NaN  
06-May-2017 09:00:00, NaN  
06-May-2017 10:00:00, NaN  
06-May-2017 11:00:00, NaN  
06-May-2017 12:00:00, NaN  
06-May-2017 13:00:00, NaN  
06-May-2017 14:00:00, NaN  
06-May-2017 15:00:00, NaN  
06-May-2017 16:00:00, NaN  
06-May-2017 17:00:00, NaN  
06-May-2017 18:00:00, NaN  
06-May-2017 19:00:00, NaN  
06-May-2017 20:00:00, NaN  
06-May-2017 21:00:00, NaN  
06-May-2017 22:00:00, NaN  
06-May-2017 23:00:00, NaN  
07-May-2017, NaN  
07-May-2017 01:00:00, NaN  
07-May-2017 02:00:00, NaN

07-May-2017 03:00:00, NaN  
07-May-2017 04:00:00, NaN  
07-May-2017 05:00:00, NaN  
07-May-2017 06:00:00, NaN  
07-May-2017 07:00:00, NaN  
07-May-2017 08:00:00, NaN  
07-May-2017 09:00:00, NaN  
07-May-2017 10:00:00, NaN  
07-May-2017 11:00:00, NaN  
07-May-2017 12:00:00, NaN  
07-May-2017 13:00:00, NaN  
07-May-2017 14:00:00, NaN  
07-May-2017 15:00:00, NaN  
07-May-2017 16:00:00, NaN  
07-May-2017 17:00:00, NaN  
07-May-2017 18:00:00, NaN  
07-May-2017 19:00:00, NaN  
07-May-2017 20:00:00, NaN  
07-May-2017 21:00:00, NaN  
07-May-2017 22:00:00, NaN  
07-May-2017 23:00:00, NaN  
08-May-2017, NaN  
08-May-2017 01:00:00, NaN  
08-May-2017 02:00:00, NaN  
08-May-2017 03:00:00, NaN  
08-May-2017 04:00:00, NaN  
08-May-2017 05:00:00, NaN  
08-May-2017 06:00:00, NaN  
08-May-2017 07:00:00, NaN  
08-May-2017 08:00:00, NaN  
08-May-2017 09:00:00, NaN  
08-May-2017 10:00:00, NaN  
08-May-2017 11:00:00, NaN  
08-May-2017 12:00:00, NaN  
08-May-2017 13:00:00, NaN  
08-May-2017 14:00:00, NaN  
08-May-2017 15:00:00, NaN  
08-May-2017 16:00:00, NaN  
08-May-2017 17:00:00, NaN  
08-May-2017 18:00:00, NaN  
08-May-2017 19:00:00, NaN  
08-May-2017 20:00:00, NaN  
08-May-2017 21:00:00, NaN  
08-May-2017 22:00:00, NaN  
08-May-2017 23:00:00, NaN  
09-May-2017, NaN  
09-May-2017 01:00:00, NaN  
09-May-2017 02:00:00, NaN  
09-May-2017 03:00:00, NaN  
09-May-2017 04:00:00, NaN  
09-May-2017 05:00:00, NaN  
09-May-2017 06:00:00, NaN  
09-May-2017 07:00:00, NaN  
09-May-2017 08:00:00, NaN  
09-May-2017 09:00:00, NaN  
09-May-2017 10:00:00, NaN  
09-May-2017 11:00:00, NaN  
09-May-2017 12:00:00, NaN  
09-May-2017 13:00:00, NaN  
09-May-2017 14:00:00, NaN  
09-May-2017 15:00:00, NaN  
09-May-2017 16:00:00, NaN  
09-May-2017 17:00:00, NaN  
09-May-2017 18:00:00, NaN

09-May-2017 19:00:00, NaN  
09-May-2017 20:00:00, NaN  
09-May-2017 21:00:00, NaN  
09-May-2017 22:00:00, NaN  
09-May-2017 23:00:00, NaN  
10-May-2017, NaN  
10-May-2017 01:00:00, NaN  
10-May-2017 02:00:00, NaN  
10-May-2017 03:00:00, NaN  
10-May-2017 04:00:00, NaN  
10-May-2017 05:00:00, NaN  
10-May-2017 06:00:00, NaN  
10-May-2017 07:00:00, NaN  
10-May-2017 08:00:00, NaN  
10-May-2017 09:00:00, NaN  
10-May-2017 10:00:00, NaN  
10-May-2017 11:00:00, NaN  
10-May-2017 12:00:00, NaN  
10-May-2017 13:00:00, NaN  
10-May-2017 14:00:00, NaN  
10-May-2017 15:00:00, NaN  
10-May-2017 16:00:00, NaN  
10-May-2017 17:00:00, NaN  
10-May-2017 18:00:00, NaN  
10-May-2017 19:00:00, NaN  
10-May-2017 20:00:00, NaN  
10-May-2017 21:00:00, NaN  
10-May-2017 22:00:00, NaN  
10-May-2017 23:00:00, NaN  
11-May-2017, NaN  
11-May-2017 01:00:00, NaN  
11-May-2017 02:00:00, NaN  
11-May-2017 03:00:00, NaN  
11-May-2017 04:00:00, NaN  
11-May-2017 05:00:00, NaN  
11-May-2017 06:00:00, NaN  
11-May-2017 07:00:00, NaN  
11-May-2017 08:00:00, NaN  
11-May-2017 09:00:00, NaN  
11-May-2017 10:00:00, NaN  
11-May-2017 11:00:00, NaN  
11-May-2017 12:00:00, NaN  
11-May-2017 13:00:00, NaN  
11-May-2017 14:00:00, NaN  
11-May-2017 15:00:00, NaN  
11-May-2017 16:00:00, NaN  
11-May-2017 17:00:00, NaN  
11-May-2017 18:00:00, NaN  
11-May-2017 19:00:00, NaN  
11-May-2017 20:00:00, NaN  
11-May-2017 21:00:00, NaN  
11-May-2017 22:00:00, NaN  
11-May-2017 23:00:00, NaN  
12-May-2017, NaN  
12-May-2017 01:00:00, NaN  
12-May-2017 02:00:00, NaN  
12-May-2017 03:00:00, NaN  
12-May-2017 04:00:00, NaN  
12-May-2017 05:00:00, NaN  
12-May-2017 06:00:00, NaN  
12-May-2017 07:00:00, NaN  
12-May-2017 08:00:00, NaN  
12-May-2017 09:00:00, NaN  
12-May-2017 10:00:00, NaN

12-May-2017 11:00:00, NaN  
12-May-2017 12:00:00, NaN  
12-May-2017 13:00:00, NaN  
12-May-2017 14:00:00, NaN  
12-May-2017 15:00:00, NaN  
12-May-2017 16:00:00, NaN  
12-May-2017 17:00:00, NaN  
12-May-2017 18:00:00, NaN  
12-May-2017 19:00:00, NaN  
12-May-2017 20:00:00, NaN  
12-May-2017 21:00:00, NaN  
12-May-2017 22:00:00, NaN  
12-May-2017 23:00:00, NaN  
13-May-2017, NaN  
13-May-2017 01:00:00, NaN  
13-May-2017 02:00:00, NaN  
13-May-2017 03:00:00, NaN  
13-May-2017 04:00:00, NaN  
13-May-2017 05:00:00, NaN  
13-May-2017 06:00:00, NaN  
13-May-2017 07:00:00, NaN  
13-May-2017 08:00:00, NaN  
13-May-2017 09:00:00, NaN  
13-May-2017 10:00:00, NaN  
13-May-2017 11:00:00, NaN  
13-May-2017 12:00:00, NaN  
13-May-2017 13:00:00, NaN  
13-May-2017 14:00:00, NaN  
13-May-2017 15:00:00, NaN  
13-May-2017 16:00:00, NaN  
13-May-2017 17:00:00, NaN  
13-May-2017 18:00:00, NaN  
13-May-2017 19:00:00, NaN  
13-May-2017 20:00:00, NaN  
13-May-2017 21:00:00, NaN  
13-May-2017 22:00:00, NaN  
13-May-2017 23:00:00, NaN  
14-May-2017, NaN  
14-May-2017 01:00:00, NaN  
14-May-2017 02:00:00, NaN  
14-May-2017 03:00:00, NaN  
14-May-2017 04:00:00, NaN  
14-May-2017 05:00:00, NaN  
14-May-2017 06:00:00, NaN  
14-May-2017 07:00:00, NaN  
14-May-2017 08:00:00, NaN  
14-May-2017 09:00:00, NaN  
14-May-2017 10:00:00, NaN  
14-May-2017 11:00:00, NaN  
14-May-2017 12:00:00, NaN  
14-May-2017 13:00:00, NaN  
14-May-2017 14:00:00, NaN  
14-May-2017 15:00:00, NaN  
14-May-2017 16:00:00, NaN  
14-May-2017 17:00:00, NaN  
14-May-2017 18:00:00, NaN  
14-May-2017 19:00:00, NaN  
14-May-2017 20:00:00, NaN  
14-May-2017 21:00:00, NaN  
14-May-2017 22:00:00, NaN  
14-May-2017 23:00:00, NaN  
15-May-2017, NaN  
15-May-2017 01:00:00, NaN  
15-May-2017 02:00:00, NaN

15-May-2017 03:00:00, NaN  
15-May-2017 04:00:00, NaN  
15-May-2017 05:00:00, NaN  
15-May-2017 06:00:00, NaN  
15-May-2017 07:00:00, NaN  
15-May-2017 08:00:00, NaN  
15-May-2017 09:00:00, NaN  
15-May-2017 10:00:00, NaN  
15-May-2017 11:00:00, NaN  
15-May-2017 12:00:00, NaN  
15-May-2017 13:00:00, NaN  
15-May-2017 14:00:00, NaN  
15-May-2017 15:00:00, NaN  
15-May-2017 16:00:00, NaN  
15-May-2017 17:00:00, NaN  
15-May-2017 18:00:00, NaN  
15-May-2017 19:00:00, NaN  
15-May-2017 20:00:00, NaN  
15-May-2017 21:00:00, NaN  
15-May-2017 22:00:00, NaN  
15-May-2017 23:00:00, NaN  
16-May-2017, NaN  
16-May-2017 01:00:00, NaN  
16-May-2017 02:00:00, NaN  
16-May-2017 03:00:00, NaN  
16-May-2017 04:00:00, NaN  
16-May-2017 05:00:00, NaN  
16-May-2017 06:00:00, NaN  
16-May-2017 07:00:00, NaN  
16-May-2017 08:00:00, NaN  
16-May-2017 09:00:00, NaN  
16-May-2017 10:00:00, NaN  
16-May-2017 11:00:00, NaN  
16-May-2017 12:00:00, NaN  
16-May-2017 13:00:00, NaN  
16-May-2017 14:00:00, NaN  
16-May-2017 15:00:00, NaN  
16-May-2017 16:00:00, NaN  
16-May-2017 17:00:00, NaN  
16-May-2017 18:00:00, NaN  
16-May-2017 19:00:00, NaN  
16-May-2017 20:00:00, NaN  
16-May-2017 21:00:00, NaN  
16-May-2017 22:00:00, NaN  
16-May-2017 23:00:00, NaN  
17-May-2017, NaN  
17-May-2017 01:00:00, NaN  
17-May-2017 02:00:00, NaN  
17-May-2017 03:00:00, NaN  
17-May-2017 04:00:00, NaN  
17-May-2017 05:00:00, NaN  
17-May-2017 06:00:00, NaN  
17-May-2017 07:00:00, NaN  
17-May-2017 08:00:00, NaN  
17-May-2017 09:00:00, NaN  
17-May-2017 10:00:00, NaN  
17-May-2017 11:00:00, NaN  
17-May-2017 12:00:00, NaN  
17-May-2017 13:00:00, NaN  
17-May-2017 14:00:00, NaN  
17-May-2017 15:00:00, NaN  
17-May-2017 16:00:00, NaN  
17-May-2017 17:00:00, NaN  
17-May-2017 18:00:00, NaN

17-May-2017 19:00:00, NaN  
17-May-2017 20:00:00, NaN  
17-May-2017 21:00:00, NaN  
17-May-2017 22:00:00, NaN  
17-May-2017 23:00:00, NaN  
18-May-2017, NaN  
18-May-2017 01:00:00, NaN  
18-May-2017 02:00:00, NaN  
18-May-2017 03:00:00, NaN  
18-May-2017 04:00:00, NaN  
18-May-2017 05:00:00, NaN  
18-May-2017 06:00:00, NaN  
18-May-2017 07:00:00, NaN  
18-May-2017 08:00:00, NaN  
18-May-2017 09:00:00, NaN  
18-May-2017 10:00:00, NaN  
18-May-2017 11:00:00, NaN  
18-May-2017 12:00:00, NaN  
18-May-2017 13:00:00, NaN  
18-May-2017 14:00:00, NaN  
18-May-2017 15:00:00, NaN  
18-May-2017 16:00:00, NaN  
18-May-2017 17:00:00, NaN  
18-May-2017 18:00:00, NaN  
18-May-2017 19:00:00, NaN  
18-May-2017 20:00:00, NaN  
18-May-2017 21:00:00, NaN  
18-May-2017 22:00:00, NaN  
18-May-2017 23:00:00, NaN  
19-May-2017, NaN  
19-May-2017 01:00:00, NaN  
19-May-2017 02:00:00, NaN  
19-May-2017 03:00:00, NaN  
19-May-2017 04:00:00, NaN  
19-May-2017 05:00:00, NaN  
19-May-2017 06:00:00, NaN  
19-May-2017 07:00:00, NaN  
19-May-2017 08:00:00, NaN  
19-May-2017 09:00:00, NaN  
19-May-2017 10:00:00, NaN  
19-May-2017 11:00:00, NaN  
19-May-2017 12:00:00, NaN  
19-May-2017 13:00:00, NaN  
19-May-2017 14:00:00, NaN  
19-May-2017 15:00:00, NaN  
19-May-2017 16:00:00, NaN  
19-May-2017 17:00:00, NaN  
19-May-2017 18:00:00, NaN  
19-May-2017 19:00:00, NaN  
19-May-2017 20:00:00, NaN  
19-May-2017 21:00:00, NaN  
19-May-2017 22:00:00, NaN  
19-May-2017 23:00:00, NaN  
20-May-2017, NaN  
20-May-2017 01:00:00, NaN  
20-May-2017 02:00:00, NaN  
20-May-2017 03:00:00, NaN  
20-May-2017 04:00:00, NaN  
20-May-2017 05:00:00, NaN  
20-May-2017 06:00:00, NaN  
20-May-2017 07:00:00, NaN  
20-May-2017 08:00:00, NaN  
20-May-2017 09:00:00, NaN  
20-May-2017 10:00:00, NaN

20-May-2017 11:00:00, NaN  
20-May-2017 12:00:00, NaN  
20-May-2017 13:00:00, NaN  
20-May-2017 14:00:00, NaN  
20-May-2017 15:00:00, NaN  
20-May-2017 16:00:00, NaN  
20-May-2017 17:00:00, NaN  
20-May-2017 18:00:00, NaN  
20-May-2017 19:00:00, NaN  
20-May-2017 20:00:00, NaN  
20-May-2017 21:00:00, NaN  
20-May-2017 22:00:00, NaN  
20-May-2017 23:00:00, NaN  
21-May-2017, NaN  
21-May-2017 01:00:00, NaN  
21-May-2017 02:00:00, NaN  
21-May-2017 03:00:00, NaN  
21-May-2017 04:00:00, NaN  
21-May-2017 05:00:00, NaN  
21-May-2017 06:00:00, NaN  
21-May-2017 07:00:00, NaN  
21-May-2017 08:00:00, NaN  
21-May-2017 09:00:00, NaN  
21-May-2017 10:00:00, NaN  
21-May-2017 11:00:00, NaN  
21-May-2017 12:00:00, NaN  
21-May-2017 13:00:00, NaN  
21-May-2017 14:00:00, NaN  
21-May-2017 15:00:00, NaN  
21-May-2017 16:00:00, NaN  
21-May-2017 17:00:00, NaN  
21-May-2017 18:00:00, NaN  
21-May-2017 19:00:00, NaN  
21-May-2017 20:00:00, NaN  
21-May-2017 21:00:00, NaN  
21-May-2017 22:00:00, NaN  
21-May-2017 23:00:00, NaN  
22-May-2017, NaN  
22-May-2017 01:00:00, NaN  
22-May-2017 02:00:00, NaN  
22-May-2017 03:00:00, NaN  
22-May-2017 04:00:00, NaN  
22-May-2017 05:00:00, NaN  
22-May-2017 06:00:00, NaN  
22-May-2017 07:00:00, NaN  
22-May-2017 08:00:00, NaN  
22-May-2017 09:00:00, NaN  
22-May-2017 10:00:00, NaN  
22-May-2017 11:00:00, NaN  
22-May-2017 12:00:00, NaN  
22-May-2017 13:00:00, NaN  
22-May-2017 14:00:00, NaN  
22-May-2017 15:00:00, NaN  
22-May-2017 16:00:00, NaN  
22-May-2017 17:00:00, NaN  
22-May-2017 18:00:00, NaN  
22-May-2017 19:00:00, NaN  
22-May-2017 20:00:00, NaN  
22-May-2017 21:00:00, NaN  
22-May-2017 22:00:00, NaN  
22-May-2017 23:00:00, NaN  
23-May-2017, NaN  
23-May-2017 01:00:00, NaN  
23-May-2017 02:00:00, NaN



|              |           |     |
|--------------|-----------|-----|
| 23-May-2017  | 03:00:00, | NaN |
| 23-May-2017  | 04:00:00, | NaN |
| 23-May-2017  | 05:00:00, | NaN |
| 23-May-2017  | 06:00:00, | NaN |
| 23-May-2017  | 07:00:00, | NaN |
| 23-May-2017  | 08:00:00, | NaN |
| 23-May-2017  | 09:00:00, | NaN |
| 23-May-2017  | 10:00:00, | NaN |
| 23-May-2017  | 11:00:00, | NaN |
| 23-May-2017  | 12:00:00, | NaN |
| 23-May-2017  | 13:00:00, | NaN |
| 23-May-2017  | 14:00:00, | NaN |
| 23-May-2017  | 15:00:00, | NaN |
| 23-May-2017  | 16:00:00, | NaN |
| 23-May-2017  | 17:00:00, | NaN |
| 23-May-2017  | 18:00:00, | NaN |
| 23-May-2017  | 19:00:00, | NaN |
| 23-May-2017  | 20:00:00, | NaN |
| 23-May-2017  | 21:00:00, | NaN |
| 23-May-2017  | 22:00:00, | NaN |
| 23-May-2017  | 23:00:00, | NaN |
| 24-May-2017, | NaN       |     |
| 24-May-2017  | 01:00:00, | NaN |
| 24-May-2017  | 02:00:00, | NaN |
| 24-May-2017  | 03:00:00, | NaN |
| 24-May-2017  | 04:00:00, | NaN |
| 24-May-2017  | 05:00:00, | NaN |
| 24-May-2017  | 06:00:00, | NaN |
| 24-May-2017  | 07:00:00, | NaN |
| 24-May-2017  | 08:00:00, | NaN |
| 24-May-2017  | 09:00:00, | NaN |
| 24-May-2017  | 10:00:00, | NaN |
| 24-May-2017  | 11:00:00, | NaN |
| 24-May-2017  | 12:00:00, | NaN |
| 24-May-2017  | 13:00:00, | NaN |
| 24-May-2017  | 14:00:00, | NaN |
| 24-May-2017  | 15:00:00, | NaN |
| 24-May-2017  | 16:00:00, | NaN |
| 24-May-2017  | 17:00:00, | NaN |
| 24-May-2017  | 18:00:00, | NaN |
| 24-May-2017  | 19:00:00, | NaN |
| 24-May-2017  | 20:00:00, | NaN |
| 24-May-2017  | 21:00:00, | NaN |
| 24-May-2017  | 22:00:00, | NaN |
| 24-May-2017  | 23:00:00, | NaN |
| 25-May-2017, | NaN       |     |
| 25-May-2017  | 01:00:00, | NaN |
| 25-May-2017  | 02:00:00, | NaN |
| 25-May-2017  | 03:00:00, | NaN |
| 25-May-2017  | 04:00:00, | NaN |
| 25-May-2017  | 05:00:00, | NaN |
| 25-May-2017  | 06:00:00, | NaN |
| 25-May-2017  | 07:00:00, | NaN |
| 25-May-2017  | 08:00:00, | NaN |
| 25-May-2017  | 09:00:00, | NaN |
| 25-May-2017  | 10:00:00, | NaN |
| 25-May-2017  | 11:00:00, | NaN |
| 25-May-2017  | 12:00:00, | NaN |
| 25-May-2017  | 13:00:00, | NaN |
| 25-May-2017  | 14:00:00, | NaN |
| 25-May-2017  | 15:00:00, | NaN |
| 25-May-2017  | 16:00:00, | NaN |
| 25-May-2017  | 17:00:00, | NaN |
| 25-May-2017  | 18:00:00, | NaN |

25-May-2017 19:00:00, NaN  
25-May-2017 20:00:00, NaN  
25-May-2017 21:00:00, NaN  
25-May-2017 22:00:00, NaN  
25-May-2017 23:00:00, NaN  
26-May-2017, NaN  
26-May-2017 01:00:00, NaN  
26-May-2017 02:00:00, NaN  
26-May-2017 03:00:00, NaN  
26-May-2017 04:00:00, NaN  
26-May-2017 05:00:00, NaN  
26-May-2017 06:00:00, NaN  
26-May-2017 07:00:00, NaN  
26-May-2017 08:00:00, NaN  
26-May-2017 09:00:00, NaN  
26-May-2017 10:00:00, NaN  
26-May-2017 11:00:00, NaN  
26-May-2017 12:00:00, NaN  
26-May-2017 13:00:00, NaN  
26-May-2017 14:00:00, NaN  
26-May-2017 15:00:00, NaN  
26-May-2017 16:00:00, NaN  
26-May-2017 17:00:00, NaN  
26-May-2017 18:00:00, NaN  
26-May-2017 19:00:00, NaN  
26-May-2017 20:00:00, NaN  
26-May-2017 21:00:00, NaN  
26-May-2017 22:00:00, NaN  
26-May-2017 23:00:00, NaN  
27-May-2017, NaN  
27-May-2017 01:00:00, NaN  
27-May-2017 02:00:00, NaN  
27-May-2017 03:00:00, NaN  
27-May-2017 04:00:00, NaN  
27-May-2017 05:00:00, NaN  
27-May-2017 06:00:00, NaN  
27-May-2017 07:00:00, NaN  
27-May-2017 08:00:00, NaN  
27-May-2017 09:00:00, NaN  
27-May-2017 10:00:00, NaN  
27-May-2017 11:00:00, NaN  
27-May-2017 12:00:00, NaN  
27-May-2017 13:00:00, NaN  
27-May-2017 14:00:00, NaN  
27-May-2017 15:00:00, NaN  
27-May-2017 16:00:00, NaN  
27-May-2017 17:00:00, NaN  
27-May-2017 18:00:00, NaN  
27-May-2017 19:00:00, NaN  
27-May-2017 20:00:00, NaN  
27-May-2017 21:00:00, NaN  
27-May-2017 22:00:00, NaN  
27-May-2017 23:00:00, NaN  
28-May-2017, NaN  
28-May-2017 01:00:00, NaN  
28-May-2017 02:00:00, NaN  
28-May-2017 03:00:00, NaN  
28-May-2017 04:00:00, NaN  
28-May-2017 05:00:00, NaN  
28-May-2017 06:00:00, NaN  
28-May-2017 07:00:00, NaN  
28-May-2017 08:00:00, NaN  
28-May-2017 09:00:00, NaN  
28-May-2017 10:00:00, NaN

28-May-2017 11:00:00, NaN  
28-May-2017 12:00:00, NaN  
28-May-2017 13:00:00, NaN  
28-May-2017 14:00:00, NaN  
28-May-2017 15:00:00, NaN  
28-May-2017 16:00:00, NaN  
28-May-2017 17:00:00, NaN  
28-May-2017 18:00:00, NaN  
28-May-2017 19:00:00, NaN  
28-May-2017 20:00:00, NaN  
28-May-2017 21:00:00, NaN  
28-May-2017 22:00:00, NaN  
28-May-2017 23:00:00, NaN  
29-May-2017, NaN  
29-May-2017 01:00:00, NaN  
29-May-2017 02:00:00, NaN  
29-May-2017 03:00:00, NaN  
29-May-2017 04:00:00, NaN  
29-May-2017 05:00:00, NaN  
29-May-2017 06:00:00, NaN  
29-May-2017 07:00:00, NaN  
29-May-2017 08:00:00, NaN  
29-May-2017 09:00:00, NaN  
29-May-2017 10:00:00, NaN  
29-May-2017 11:00:00, NaN  
29-May-2017 12:00:00, NaN  
29-May-2017 13:00:00, NaN  
29-May-2017 14:00:00, NaN  
29-May-2017 15:00:00, NaN  
29-May-2017 16:00:00, NaN  
29-May-2017 17:00:00, NaN  
29-May-2017 18:00:00, NaN  
29-May-2017 19:00:00, NaN  
29-May-2017 20:00:00, NaN  
29-May-2017 21:00:00, NaN  
29-May-2017 22:00:00, NaN  
29-May-2017 23:00:00, NaN  
30-May-2017, NaN  
30-May-2017 01:00:00, NaN  
30-May-2017 02:00:00, NaN  
30-May-2017 03:00:00, NaN  
30-May-2017 04:00:00, NaN  
30-May-2017 05:00:00, NaN  
30-May-2017 06:00:00, NaN  
30-May-2017 07:00:00, NaN  
30-May-2017 08:00:00, NaN  
30-May-2017 09:00:00, NaN  
30-May-2017 10:00:00, NaN  
30-May-2017 11:00:00, NaN  
30-May-2017 12:00:00, NaN  
30-May-2017 13:00:00, NaN  
30-May-2017 14:00:00, NaN  
30-May-2017 15:00:00, NaN  
30-May-2017 16:00:00, NaN  
30-May-2017 17:00:00, NaN  
30-May-2017 18:00:00, NaN  
30-May-2017 19:00:00, NaN  
30-May-2017 20:00:00, NaN  
30-May-2017 21:00:00, NaN  
30-May-2017 22:00:00, NaN  
30-May-2017 23:00:00, NaN  
31-May-2017, NaN  
31-May-2017 01:00:00, NaN  
31-May-2017 02:00:00, NaN

31-May-2017 03:00:00, NaN  
31-May-2017 04:00:00, NaN  
31-May-2017 05:00:00, NaN  
31-May-2017 06:00:00, NaN  
31-May-2017 07:00:00, NaN  
31-May-2017 08:00:00, NaN  
31-May-2017 09:00:00, NaN  
31-May-2017 10:00:00, NaN  
31-May-2017 11:00:00, NaN  
31-May-2017 12:00:00, NaN  
31-May-2017 13:00:00, NaN  
31-May-2017 14:00:00, NaN  
31-May-2017 15:00:00, NaN  
31-May-2017 16:00:00, NaN  
31-May-2017 17:00:00, NaN  
31-May-2017 18:00:00, NaN  
31-May-2017 19:00:00, NaN  
31-May-2017 20:00:00, NaN  
31-May-2017 21:00:00, NaN  
31-May-2017 22:00:00, NaN  
31-May-2017 23:00:00, NaN  
01-Jun-2017, 4.82e-01  
01-Jun-2017 01:00:00, 4.82e-01  
01-Jun-2017 02:00:00, 4.82e-01  
01-Jun-2017 03:00:00, 4.82e-01  
01-Jun-2017 04:00:00, 4.82e-01  
01-Jun-2017 05:00:00, 4.82e-01  
01-Jun-2017 06:00:00, 4.82e-01  
01-Jun-2017 07:00:00, 4.82e-01  
01-Jun-2017 08:00:00, 4.82e-01  
01-Jun-2017 09:00:00, 4.82e-01  
01-Jun-2017 10:00:00, 4.82e-01  
01-Jun-2017 11:00:00, 4.82e-01  
01-Jun-2017 12:00:00, 4.82e-01  
01-Jun-2017 13:00:00, 4.82e-01  
01-Jun-2017 14:00:00, 4.82e-01  
01-Jun-2017 15:00:00, 4.83e-01  
01-Jun-2017 16:00:00, 4.86e-01  
01-Jun-2017 17:00:00, 4.83e-01  
01-Jun-2017 18:00:00, 4.82e-01  
01-Jun-2017 19:00:00, 4.82e-01  
01-Jun-2017 20:00:00, 4.82e-01  
01-Jun-2017 21:00:00, 4.82e-01  
01-Jun-2017 22:00:00, 4.82e-01  
01-Jun-2017 23:00:00, 4.82e-01  
02-Jun-2017, 4.82e-01  
02-Jun-2017 01:00:00, 4.82e-01  
02-Jun-2017 02:00:00, 4.82e-01  
02-Jun-2017 03:00:00, 4.82e-01  
02-Jun-2017 04:00:00, 4.82e-01  
02-Jun-2017 05:00:00, 4.82e-01  
02-Jun-2017 06:00:00, 4.82e-01  
02-Jun-2017 07:00:00, 4.82e-01  
02-Jun-2017 08:00:00, 4.82e-01  
02-Jun-2017 09:00:00, 4.82e-01  
02-Jun-2017 10:00:00, 4.82e-01  
02-Jun-2017 11:00:00, 4.82e-01  
02-Jun-2017 12:00:00, 4.83e-01  
02-Jun-2017 13:00:00, 4.82e-01  
02-Jun-2017 14:00:00, 4.82e-01  
02-Jun-2017 15:00:00, 4.83e-01  
02-Jun-2017 16:00:00, 4.83e-01  
02-Jun-2017 17:00:00, 4.83e-01  
02-Jun-2017 18:00:00, 4.83e-01

02-Jun-2017 19:00:00, 4.83e-01  
02-Jun-2017 20:00:00, 4.83e-01  
02-Jun-2017 21:00:00, 4.83e-01  
02-Jun-2017 22:00:00, 4.82e-01  
02-Jun-2017 23:00:00, 4.83e-01  
03-Jun-2017, 4.83e-01  
03-Jun-2017 01:00:00, 4.83e-01  
03-Jun-2017 02:00:00, 4.83e-01  
03-Jun-2017 03:00:00, 4.83e-01  
03-Jun-2017 04:00:00, 4.83e-01  
03-Jun-2017 05:00:00, 4.83e-01  
03-Jun-2017 06:00:00, 4.83e-01  
03-Jun-2017 07:00:00, 4.84e-01  
03-Jun-2017 08:00:00, 4.85e-01  
03-Jun-2017 09:00:00, 4.84e-01  
03-Jun-2017 10:00:00, 4.84e-01  
03-Jun-2017 11:00:00, 4.84e-01  
03-Jun-2017 12:00:00, 4.83e-01  
03-Jun-2017 13:00:00, 4.83e-01  
03-Jun-2017 14:00:00, 4.83e-01  
03-Jun-2017 15:00:00, 4.83e-01  
03-Jun-2017 16:00:00, 4.83e-01  
03-Jun-2017 17:00:00, 4.83e-01  
03-Jun-2017 18:00:00, 4.83e-01  
03-Jun-2017 19:00:00, 4.83e-01  
03-Jun-2017 20:00:00, 4.82e-01  
03-Jun-2017 21:00:00, 4.82e-01  
03-Jun-2017 22:00:00, 4.82e-01  
03-Jun-2017 23:00:00, 4.82e-01  
04-Jun-2017, 4.82e-01  
04-Jun-2017 01:00:00, 4.82e-01  
04-Jun-2017 02:00:00, 4.82e-01  
04-Jun-2017 03:00:00, 4.82e-01  
04-Jun-2017 04:00:00, 4.82e-01  
04-Jun-2017 05:00:00, 4.82e-01  
04-Jun-2017 06:00:00, 4.82e-01  
04-Jun-2017 07:00:00, 4.83e-01  
04-Jun-2017 08:00:00, 4.84e-01  
04-Jun-2017 09:00:00, 4.83e-01  
04-Jun-2017 10:00:00, 4.83e-01  
04-Jun-2017 11:00:00, 4.83e-01  
04-Jun-2017 12:00:00, 4.83e-01  
04-Jun-2017 13:00:00, 4.83e-01  
04-Jun-2017 14:00:00, 4.83e-01  
04-Jun-2017 15:00:00, 4.83e-01  
04-Jun-2017 16:00:00, 4.83e-01  
04-Jun-2017 17:00:00, 4.83e-01  
04-Jun-2017 18:00:00, 4.82e-01  
04-Jun-2017 19:00:00, 4.82e-01  
04-Jun-2017 20:00:00, 4.82e-01  
04-Jun-2017 21:00:00, 4.82e-01  
04-Jun-2017 22:00:00, 4.82e-01  
04-Jun-2017 23:00:00, 4.82e-01  
05-Jun-2017, 4.82e-01  
05-Jun-2017 01:00:00, 4.82e-01  
05-Jun-2017 02:00:00, 4.82e-01  
05-Jun-2017 03:00:00, 4.82e-01  
05-Jun-2017 04:00:00, 4.82e-01  
05-Jun-2017 05:00:00, 4.82e-01  
05-Jun-2017 06:00:00, 4.82e-01  
05-Jun-2017 07:00:00, 4.82e-01  
05-Jun-2017 08:00:00, 4.82e-01  
05-Jun-2017 09:00:00, 4.82e-01  
05-Jun-2017 10:00:00, 4.83e-01

05-Jun-2017 11:00:00, 4.83e-01  
05-Jun-2017 12:00:00, 4.83e-01  
05-Jun-2017 13:00:00, 4.83e-01  
05-Jun-2017 14:00:00, 4.82e-01  
05-Jun-2017 15:00:00, 4.82e-01  
05-Jun-2017 16:00:00, 4.82e-01  
05-Jun-2017 17:00:00, 4.82e-01  
05-Jun-2017 18:00:00, 4.82e-01  
05-Jun-2017 19:00:00, 4.82e-01  
05-Jun-2017 20:00:00, 4.83e-01  
05-Jun-2017 21:00:00, 4.85e-01  
05-Jun-2017 22:00:00, 4.85e-01  
05-Jun-2017 23:00:00, 4.84e-01  
06-Jun-2017, 4.84e-01  
06-Jun-2017 01:00:00, 4.84e-01  
06-Jun-2017 02:00:00, 4.84e-01  
06-Jun-2017 03:00:00, 4.84e-01  
06-Jun-2017 04:00:00, 4.84e-01  
06-Jun-2017 05:00:00, 4.84e-01  
06-Jun-2017 06:00:00, 4.84e-01  
06-Jun-2017 07:00:00, 4.84e-01  
06-Jun-2017 08:00:00, 4.84e-01  
06-Jun-2017 09:00:00, 4.84e-01  
06-Jun-2017 10:00:00, 4.84e-01  
06-Jun-2017 11:00:00, 4.84e-01  
06-Jun-2017 12:00:00, 4.84e-01  
06-Jun-2017 13:00:00, 4.83e-01  
06-Jun-2017 14:00:00, 4.84e-01  
06-Jun-2017 15:00:00, 4.83e-01  
06-Jun-2017 16:00:00, 4.83e-01  
06-Jun-2017 17:00:00, 4.83e-01  
06-Jun-2017 18:00:00, 4.83e-01  
06-Jun-2017 19:00:00, 4.83e-01  
06-Jun-2017 20:00:00, 4.82e-01  
06-Jun-2017 21:00:00, 4.82e-01  
06-Jun-2017 22:00:00, 4.82e-01  
06-Jun-2017 23:00:00, 4.82e-01  
07-Jun-2017, 4.82e-01  
07-Jun-2017 01:00:00, 4.82e-01  
07-Jun-2017 02:00:00, 4.82e-01  
07-Jun-2017 03:00:00, 4.82e-01  
07-Jun-2017 04:00:00, 4.82e-01  
07-Jun-2017 05:00:00, 4.82e-01  
07-Jun-2017 06:00:00, 4.82e-01  
07-Jun-2017 07:00:00, 4.83e-01  
07-Jun-2017 08:00:00, 4.84e-01  
07-Jun-2017 09:00:00, 4.83e-01  
07-Jun-2017 10:00:00, 4.83e-01  
07-Jun-2017 11:00:00, 4.83e-01  
07-Jun-2017 12:00:00, 4.83e-01  
07-Jun-2017 13:00:00, 4.83e-01  
07-Jun-2017 14:00:00, 4.83e-01  
07-Jun-2017 15:00:00, 4.82e-01  
07-Jun-2017 16:00:00, 4.82e-01  
07-Jun-2017 17:00:00, 4.82e-01  
07-Jun-2017 18:00:00, 4.83e-01  
07-Jun-2017 19:00:00, 4.82e-01  
07-Jun-2017 20:00:00, 4.84e-01  
07-Jun-2017 21:00:00, 4.85e-01  
07-Jun-2017 22:00:00, 4.85e-01  
07-Jun-2017 23:00:00, 4.85e-01  
08-Jun-2017, 4.85e-01  
08-Jun-2017 01:00:00, 4.85e-01  
08-Jun-2017 02:00:00, 4.85e-01

08-Jun-2017 03:00:00, 4.85e-01  
08-Jun-2017 04:00:00, 4.85e-01  
08-Jun-2017 05:00:00, 4.85e-01  
08-Jun-2017 06:00:00, 4.85e-01  
08-Jun-2017 07:00:00, 4.85e-01  
08-Jun-2017 08:00:00, 4.85e-01  
08-Jun-2017 09:00:00, 4.84e-01  
08-Jun-2017 10:00:00, 4.83e-01  
08-Jun-2017 11:00:00, 4.83e-01  
08-Jun-2017 12:00:00, 4.84e-01  
08-Jun-2017 13:00:00, 4.83e-01  
08-Jun-2017 14:00:00, 4.83e-01  
08-Jun-2017 15:00:00, 4.83e-01  
08-Jun-2017 16:00:00, 4.83e-01  
08-Jun-2017 17:00:00, 4.82e-01  
08-Jun-2017 18:00:00, 4.82e-01  
08-Jun-2017 19:00:00, 4.82e-01  
08-Jun-2017 20:00:00, 4.82e-01  
08-Jun-2017 21:00:00, 4.81e-01  
08-Jun-2017 22:00:00, 4.81e-01  
08-Jun-2017 23:00:00, 4.81e-01  
09-Jun-2017, 4.81e-01  
09-Jun-2017 01:00:00, 4.81e-01  
09-Jun-2017 02:00:00, 4.81e-01  
09-Jun-2017 03:00:00, 4.81e-01  
09-Jun-2017 04:00:00, 4.81e-01  
09-Jun-2017 05:00:00, 4.82e-01  
09-Jun-2017 06:00:00, 4.82e-01  
09-Jun-2017 07:00:00, 4.82e-01  
09-Jun-2017 08:00:00, 4.84e-01  
09-Jun-2017 09:00:00, 4.83e-01  
09-Jun-2017 10:00:00, 4.82e-01  
09-Jun-2017 11:00:00, 4.82e-01  
09-Jun-2017 12:00:00, 4.82e-01  
09-Jun-2017 13:00:00, 4.82e-01  
09-Jun-2017 14:00:00, 4.81e-01  
09-Jun-2017 15:00:00, 4.81e-01  
09-Jun-2017 16:00:00, 4.81e-01  
09-Jun-2017 17:00:00, 4.81e-01  
09-Jun-2017 18:00:00, 4.81e-01  
09-Jun-2017 19:00:00, 4.81e-01  
09-Jun-2017 20:00:00, 4.81e-01  
09-Jun-2017 21:00:00, 4.81e-01  
09-Jun-2017 22:00:00, 4.81e-01  
09-Jun-2017 23:00:00, 4.81e-01  
10-Jun-2017, 4.81e-01  
10-Jun-2017 01:00:00, 4.81e-01  
10-Jun-2017 02:00:00, 4.81e-01  
10-Jun-2017 03:00:00, 4.81e-01  
10-Jun-2017 04:00:00, 4.81e-01  
10-Jun-2017 05:00:00, 4.81e-01  
10-Jun-2017 06:00:00, 4.81e-01  
10-Jun-2017 07:00:00, 4.81e-01  
10-Jun-2017 08:00:00, 4.81e-01  
10-Jun-2017 09:00:00, 4.81e-01  
10-Jun-2017 10:00:00, 4.81e-01  
10-Jun-2017 11:00:00, 4.81e-01  
10-Jun-2017 12:00:00, 4.81e-01  
10-Jun-2017 13:00:00, 4.81e-01  
10-Jun-2017 14:00:00, 4.81e-01  
10-Jun-2017 15:00:00, 4.81e-01  
10-Jun-2017 16:00:00, 4.81e-01  
10-Jun-2017 17:00:00, 4.81e-01  
10-Jun-2017 18:00:00, 4.81e-01

10-Jun-2017 19:00:00, 4.81e-01  
10-Jun-2017 20:00:00, 4.81e-01  
10-Jun-2017 21:00:00, 4.80e-01  
10-Jun-2017 22:00:00, 4.80e-01  
10-Jun-2017 23:00:00, 4.80e-01  
11-Jun-2017, 4.80e-01  
11-Jun-2017 01:00:00, 4.80e-01  
11-Jun-2017 02:00:00, 4.80e-01  
11-Jun-2017 03:00:00, 4.80e-01  
11-Jun-2017 04:00:00, 4.80e-01  
11-Jun-2017 05:00:00, 4.80e-01  
11-Jun-2017 06:00:00, 4.80e-01  
11-Jun-2017 07:00:00, 4.81e-01  
11-Jun-2017 08:00:00, 4.81e-01  
11-Jun-2017 09:00:00, 4.81e-01  
11-Jun-2017 10:00:00, 4.81e-01  
11-Jun-2017 11:00:00, 4.81e-01  
11-Jun-2017 12:00:00, 4.81e-01  
11-Jun-2017 13:00:00, 4.81e-01  
11-Jun-2017 14:00:00, 4.81e-01  
11-Jun-2017 15:00:00, 4.81e-01  
11-Jun-2017 16:00:00, 4.81e-01  
11-Jun-2017 17:00:00, 4.81e-01  
11-Jun-2017 18:00:00, 4.81e-01  
11-Jun-2017 19:00:00, 4.81e-01  
11-Jun-2017 20:00:00, 4.81e-01  
11-Jun-2017 21:00:00, 4.80e-01  
11-Jun-2017 22:00:00, 4.80e-01  
11-Jun-2017 23:00:00, 4.80e-01  
12-Jun-2017, 4.80e-01  
12-Jun-2017 01:00:00, 4.80e-01  
12-Jun-2017 02:00:00, 4.80e-01  
12-Jun-2017 03:00:00, 4.80e-01  
12-Jun-2017 04:00:00, 4.80e-01  
12-Jun-2017 05:00:00, 4.80e-01  
12-Jun-2017 06:00:00, 4.80e-01  
12-Jun-2017 07:00:00, 4.80e-01  
12-Jun-2017 08:00:00, 4.81e-01  
12-Jun-2017 09:00:00, 4.81e-01  
12-Jun-2017 10:00:00, 4.81e-01  
12-Jun-2017 11:00:00, 4.81e-01  
12-Jun-2017 12:00:00, 4.81e-01  
12-Jun-2017 13:00:00, 4.80e-01  
12-Jun-2017 14:00:00, 4.80e-01  
12-Jun-2017 15:00:00, 4.81e-01  
12-Jun-2017 16:00:00, 4.81e-01  
12-Jun-2017 17:00:00, 4.81e-01  
12-Jun-2017 18:00:00, 4.81e-01  
12-Jun-2017 19:00:00, 4.81e-01  
12-Jun-2017 20:00:00, 4.81e-01  
12-Jun-2017 21:00:00, 4.81e-01  
12-Jun-2017 22:00:00, 4.81e-01  
12-Jun-2017 23:00:00, 4.81e-01  
13-Jun-2017, 4.81e-01  
13-Jun-2017 01:00:00, 4.81e-01  
13-Jun-2017 02:00:00, 4.81e-01  
13-Jun-2017 03:00:00, 4.81e-01  
13-Jun-2017 04:00:00, 4.81e-01  
13-Jun-2017 05:00:00, 4.81e-01  
13-Jun-2017 06:00:00, 4.81e-01  
13-Jun-2017 07:00:00, 4.81e-01  
13-Jun-2017 08:00:00, 4.81e-01  
13-Jun-2017 09:00:00, 4.81e-01  
13-Jun-2017 10:00:00, 4.81e-01



13-Jun-2017 11:00:00, 4.81e-01  
13-Jun-2017 12:00:00, 4.80e-01  
13-Jun-2017 13:00:00, 4.80e-01  
13-Jun-2017 14:00:00, 4.80e-01  
13-Jun-2017 15:00:00, 4.79e-01  
13-Jun-2017 16:00:00, 4.80e-01  
13-Jun-2017 17:00:00, 4.79e-01  
13-Jun-2017 18:00:00, 4.79e-01  
13-Jun-2017 19:00:00, 4.79e-01  
13-Jun-2017 20:00:00, 4.79e-01  
13-Jun-2017 21:00:00, 4.78e-01  
13-Jun-2017 22:00:00, 4.79e-01  
13-Jun-2017 23:00:00, 4.79e-01  
14-Jun-2017, 4.79e-01  
14-Jun-2017 01:00:00, 4.79e-01  
14-Jun-2017 02:00:00, 4.79e-01  
14-Jun-2017 03:00:00, 4.79e-01  
14-Jun-2017 04:00:00, 4.79e-01  
14-Jun-2017 05:00:00, 4.79e-01  
14-Jun-2017 06:00:00, 4.78e-01  
14-Jun-2017 07:00:00, 4.79e-01  
14-Jun-2017 08:00:00, 4.82e-01  
14-Jun-2017 09:00:00, 4.80e-01  
14-Jun-2017 10:00:00, 4.80e-01  
14-Jun-2017 11:00:00, 4.80e-01  
14-Jun-2017 12:00:00, 4.79e-01  
14-Jun-2017 13:00:00, 4.79e-01  
14-Jun-2017 14:00:00, 4.79e-01  
14-Jun-2017 15:00:00, 4.79e-01  
14-Jun-2017 16:00:00, 4.79e-01  
14-Jun-2017 17:00:00, 4.78e-01  
14-Jun-2017 18:00:00, 4.78e-01  
14-Jun-2017 19:00:00, 4.78e-01  
14-Jun-2017 20:00:00, 4.78e-01  
14-Jun-2017 21:00:00, 4.78e-01  
14-Jun-2017 22:00:00, 4.78e-01  
14-Jun-2017 23:00:00, 4.78e-01  
15-Jun-2017, 4.78e-01  
15-Jun-2017 01:00:00, 4.78e-01  
15-Jun-2017 02:00:00, 4.78e-01  
15-Jun-2017 03:00:00, 4.78e-01  
15-Jun-2017 04:00:00, 4.78e-01  
15-Jun-2017 05:00:00, 4.78e-01  
15-Jun-2017 06:00:00, 4.78e-01  
15-Jun-2017 07:00:00, 4.79e-01  
15-Jun-2017 08:00:00, 4.82e-01  
15-Jun-2017 09:00:00, 4.79e-01  
15-Jun-2017 10:00:00, 4.79e-01  
15-Jun-2017 11:00:00, 4.79e-01  
15-Jun-2017 12:00:00, 4.79e-01  
15-Jun-2017 13:00:00, 4.79e-01  
15-Jun-2017 14:00:00, 4.79e-01  
15-Jun-2017 15:00:00, 4.79e-01  
15-Jun-2017 16:00:00, 4.79e-01  
15-Jun-2017 17:00:00, 4.79e-01  
15-Jun-2017 18:00:00, 4.79e-01  
15-Jun-2017 19:00:00, 4.79e-01  
15-Jun-2017 20:00:00, 4.78e-01  
15-Jun-2017 21:00:00, 4.78e-01  
15-Jun-2017 22:00:00, 4.78e-01  
15-Jun-2017 23:00:00, 4.78e-01  
16-Jun-2017, 4.78e-01  
16-Jun-2017 01:00:00, 4.78e-01  
16-Jun-2017 02:00:00, 4.78e-01

16-Jun-2017 03:00:00, 4.78e-01  
16-Jun-2017 04:00:00, 4.78e-01  
16-Jun-2017 05:00:00, 4.78e-01  
16-Jun-2017 06:00:00, 4.78e-01  
16-Jun-2017 07:00:00, 4.79e-01  
16-Jun-2017 08:00:00, 4.81e-01  
16-Jun-2017 09:00:00, 4.79e-01  
16-Jun-2017 10:00:00, 4.79e-01  
16-Jun-2017 11:00:00, 4.80e-01  
16-Jun-2017 12:00:00, 4.79e-01  
16-Jun-2017 13:00:00, 4.79e-01  
16-Jun-2017 14:00:00, 4.79e-01  
16-Jun-2017 15:00:00, 4.79e-01  
16-Jun-2017 16:00:00, 4.78e-01  
16-Jun-2017 17:00:00, 4.78e-01  
16-Jun-2017 18:00:00, 4.78e-01  
16-Jun-2017 19:00:00, 4.78e-01  
16-Jun-2017 20:00:00, 4.78e-01  
16-Jun-2017 21:00:00, 4.78e-01  
16-Jun-2017 22:00:00, 4.77e-01  
16-Jun-2017 23:00:00, 4.77e-01  
17-Jun-2017, 4.77e-01  
17-Jun-2017 01:00:00, 4.78e-01  
17-Jun-2017 02:00:00, 4.78e-01  
17-Jun-2017 03:00:00, 4.78e-01  
17-Jun-2017 04:00:00, 4.78e-01  
17-Jun-2017 05:00:00, 4.78e-01  
17-Jun-2017 06:00:00, 4.78e-01  
17-Jun-2017 07:00:00, 4.79e-01  
17-Jun-2017 08:00:00, 4.78e-01  
17-Jun-2017 09:00:00, 4.78e-01  
17-Jun-2017 10:00:00, 4.78e-01  
17-Jun-2017 11:00:00, 4.79e-01  
17-Jun-2017 12:00:00, 4.78e-01  
17-Jun-2017 13:00:00, 4.78e-01  
17-Jun-2017 14:00:00, 4.78e-01  
17-Jun-2017 15:00:00, 4.78e-01  
17-Jun-2017 16:00:00, 4.78e-01  
17-Jun-2017 17:00:00, 4.77e-01  
17-Jun-2017 18:00:00, 4.76e-01  
17-Jun-2017 19:00:00, 4.76e-01  
17-Jun-2017 20:00:00, 4.76e-01  
17-Jun-2017 21:00:00, 4.75e-01  
17-Jun-2017 22:00:00, 4.75e-01  
17-Jun-2017 23:00:00, 4.75e-01  
18-Jun-2017, 4.75e-01  
18-Jun-2017 01:00:00, 4.75e-01  
18-Jun-2017 02:00:00, 4.75e-01  
18-Jun-2017 03:00:00, 4.75e-01  
18-Jun-2017 04:00:00, 4.76e-01  
18-Jun-2017 05:00:00, 4.77e-01  
18-Jun-2017 06:00:00, 4.78e-01  
18-Jun-2017 07:00:00, 4.79e-01  
18-Jun-2017 08:00:00, 4.78e-01  
18-Jun-2017 09:00:00, 4.77e-01  
18-Jun-2017 10:00:00, 4.77e-01  
18-Jun-2017 11:00:00, 4.77e-01  
18-Jun-2017 12:00:00, 4.77e-01  
18-Jun-2017 13:00:00, 4.76e-01  
18-Jun-2017 14:00:00, 4.76e-01  
18-Jun-2017 15:00:00, 4.76e-01  
18-Jun-2017 16:00:00, 4.77e-01  
18-Jun-2017 17:00:00, 4.76e-01  
18-Jun-2017 18:00:00, 4.76e-01

18-Jun-2017 19:00:00, 4.75e-01  
18-Jun-2017 20:00:00, 4.74e-01  
18-Jun-2017 21:00:00, 4.74e-01  
18-Jun-2017 22:00:00, 4.74e-01  
18-Jun-2017 23:00:00, 4.74e-01  
19-Jun-2017, 4.74e-01  
19-Jun-2017 01:00:00, 4.74e-01  
19-Jun-2017 02:00:00, 4.74e-01  
19-Jun-2017 03:00:00, 4.74e-01  
19-Jun-2017 04:00:00, 4.75e-01  
19-Jun-2017 05:00:00, 4.77e-01  
19-Jun-2017 06:00:00, 4.78e-01  
19-Jun-2017 07:00:00, 4.78e-01  
19-Jun-2017 08:00:00, 4.78e-01  
19-Jun-2017 09:00:00, 4.76e-01  
19-Jun-2017 10:00:00, 4.76e-01  
19-Jun-2017 11:00:00, 4.76e-01  
19-Jun-2017 12:00:00, 4.76e-01  
19-Jun-2017 13:00:00, 4.75e-01  
19-Jun-2017 14:00:00, 4.75e-01  
19-Jun-2017 15:00:00, 4.75e-01  
19-Jun-2017 16:00:00, 4.75e-01  
19-Jun-2017 17:00:00, 4.75e-01  
19-Jun-2017 18:00:00, 4.75e-01  
19-Jun-2017 19:00:00, 4.74e-01  
19-Jun-2017 20:00:00, 4.74e-01  
19-Jun-2017 21:00:00, 4.74e-01  
19-Jun-2017 22:00:00, 4.74e-01  
19-Jun-2017 23:00:00, 4.74e-01  
20-Jun-2017, 4.74e-01  
20-Jun-2017 01:00:00, 4.74e-01  
20-Jun-2017 02:00:00, 4.74e-01  
20-Jun-2017 03:00:00, 4.74e-01  
20-Jun-2017 04:00:00, 4.74e-01  
20-Jun-2017 05:00:00, 4.76e-01  
20-Jun-2017 06:00:00, 4.77e-01  
20-Jun-2017 07:00:00, 4.77e-01  
20-Jun-2017 08:00:00, 4.77e-01  
20-Jun-2017 09:00:00, 4.75e-01  
20-Jun-2017 10:00:00, 4.75e-01  
20-Jun-2017 11:00:00, 4.75e-01  
20-Jun-2017 12:00:00, 4.75e-01  
20-Jun-2017 13:00:00, 4.75e-01  
20-Jun-2017 14:00:00, 4.75e-01  
20-Jun-2017 15:00:00, 4.74e-01  
20-Jun-2017 16:00:00, 4.76e-01  
20-Jun-2017 17:00:00, 4.76e-01  
20-Jun-2017 18:00:00, 4.76e-01  
20-Jun-2017 19:00:00, 4.76e-01  
20-Jun-2017 20:00:00, 4.77e-01  
20-Jun-2017 21:00:00, 4.77e-01  
20-Jun-2017 22:00:00, 4.78e-01  
20-Jun-2017 23:00:00, 4.78e-01  
21-Jun-2017, 4.78e-01  
21-Jun-2017 01:00:00, 4.78e-01  
21-Jun-2017 02:00:00, 4.78e-01  
21-Jun-2017 03:00:00, 4.78e-01  
21-Jun-2017 04:00:00, 4.78e-01  
21-Jun-2017 05:00:00, 4.78e-01  
21-Jun-2017 06:00:00, 4.77e-01  
21-Jun-2017 07:00:00, 4.77e-01  
21-Jun-2017 08:00:00, 4.77e-01  
21-Jun-2017 09:00:00, 4.76e-01  
21-Jun-2017 10:00:00, 4.76e-01

21-Jun-2017 11:00:00, 4.75e-01  
21-Jun-2017 12:00:00, 4.75e-01  
21-Jun-2017 13:00:00, 4.75e-01  
21-Jun-2017 14:00:00, 4.74e-01  
21-Jun-2017 15:00:00, 4.74e-01  
21-Jun-2017 16:00:00, 4.74e-01  
21-Jun-2017 17:00:00, 4.74e-01  
21-Jun-2017 18:00:00, 4.74e-01  
21-Jun-2017 19:00:00, 4.74e-01  
21-Jun-2017 20:00:00, 4.74e-01  
21-Jun-2017 21:00:00, 4.74e-01  
21-Jun-2017 22:00:00, 4.74e-01  
21-Jun-2017 23:00:00, 4.74e-01  
22-Jun-2017, 4.74e-01  
22-Jun-2017 01:00:00, 4.74e-01  
22-Jun-2017 02:00:00, 4.74e-01  
22-Jun-2017 03:00:00, 4.74e-01  
22-Jun-2017 04:00:00, 4.73e-01  
22-Jun-2017 05:00:00, 4.72e-01  
22-Jun-2017 06:00:00, 4.72e-01  
22-Jun-2017 07:00:00, 4.74e-01  
22-Jun-2017 08:00:00, 4.74e-01  
22-Jun-2017 09:00:00, 4.74e-01  
22-Jun-2017 10:00:00, 4.74e-01  
22-Jun-2017 11:00:00, 4.74e-01  
22-Jun-2017 12:00:00, 4.74e-01  
22-Jun-2017 13:00:00, 4.74e-01  
22-Jun-2017 14:00:00, 4.74e-01  
22-Jun-2017 15:00:00, 4.74e-01  
22-Jun-2017 16:00:00, 4.74e-01  
22-Jun-2017 17:00:00, 4.74e-01  
22-Jun-2017 18:00:00, 4.73e-01  
22-Jun-2017 19:00:00, 4.73e-01  
22-Jun-2017 20:00:00, 4.71e-01  
22-Jun-2017 21:00:00, 4.71e-01  
22-Jun-2017 22:00:00, 4.71e-01  
22-Jun-2017 23:00:00, 4.71e-01  
23-Jun-2017, 4.71e-01  
23-Jun-2017 01:00:00, 4.71e-01  
23-Jun-2017 02:00:00, 4.71e-01  
23-Jun-2017 03:00:00, 4.71e-01  
23-Jun-2017 04:00:00, 4.71e-01  
23-Jun-2017 05:00:00, 4.71e-01  
23-Jun-2017 06:00:00, 4.71e-01  
23-Jun-2017 07:00:00, 4.72e-01  
23-Jun-2017 08:00:00, 4.74e-01  
23-Jun-2017 09:00:00, 4.73e-01  
23-Jun-2017 10:00:00, 4.73e-01  
23-Jun-2017 11:00:00, 4.73e-01  
23-Jun-2017 12:00:00, 4.73e-01  
23-Jun-2017 13:00:00, 4.74e-01  
23-Jun-2017 14:00:00, 4.73e-01  
23-Jun-2017 15:00:00, 4.73e-01  
23-Jun-2017 16:00:00, 4.73e-01  
23-Jun-2017 17:00:00, 4.72e-01  
23-Jun-2017 18:00:00, 4.72e-01  
23-Jun-2017 19:00:00, 4.71e-01  
23-Jun-2017 20:00:00, 4.71e-01  
23-Jun-2017 21:00:00, 4.71e-01  
23-Jun-2017 22:00:00, 4.71e-01  
23-Jun-2017 23:00:00, 4.71e-01  
24-Jun-2017, 4.71e-01  
24-Jun-2017 01:00:00, 4.71e-01  
24-Jun-2017 02:00:00, 4.71e-01

24-Jun-2017 03:00:00, 4.70e-01  
24-Jun-2017 04:00:00, 4.70e-01  
24-Jun-2017 05:00:00, 4.70e-01  
24-Jun-2017 06:00:00, 4.70e-01  
24-Jun-2017 07:00:00, 4.72e-01  
24-Jun-2017 08:00:00, 4.76e-01  
24-Jun-2017 09:00:00, 4.74e-01  
24-Jun-2017 10:00:00, 4.73e-01  
24-Jun-2017 11:00:00, 4.73e-01  
24-Jun-2017 12:00:00, 4.72e-01  
24-Jun-2017 13:00:00, 4.72e-01  
24-Jun-2017 14:00:00, 4.72e-01  
24-Jun-2017 15:00:00, 4.72e-01  
24-Jun-2017 16:00:00, 4.72e-01  
24-Jun-2017 17:00:00, 4.71e-01  
24-Jun-2017 18:00:00, 4.71e-01  
24-Jun-2017 19:00:00, 4.71e-01  
24-Jun-2017 20:00:00, 4.70e-01  
24-Jun-2017 21:00:00, 4.69e-01  
24-Jun-2017 22:00:00, 4.69e-01  
24-Jun-2017 23:00:00, 4.69e-01  
25-Jun-2017, 4.70e-01  
25-Jun-2017 01:00:00, 4.70e-01  
25-Jun-2017 02:00:00, 4.70e-01  
25-Jun-2017 03:00:00, 4.70e-01  
25-Jun-2017 04:00:00, 4.70e-01  
25-Jun-2017 05:00:00, 4.70e-01  
25-Jun-2017 06:00:00, 4.71e-01  
25-Jun-2017 07:00:00, 4.72e-01  
25-Jun-2017 08:00:00, 4.76e-01  
25-Jun-2017 09:00:00, 4.74e-01  
25-Jun-2017 10:00:00, 4.74e-01  
25-Jun-2017 11:00:00, 4.74e-01  
25-Jun-2017 12:00:00, 4.72e-01  
25-Jun-2017 13:00:00, 4.71e-01  
25-Jun-2017 14:00:00, 4.71e-01  
25-Jun-2017 15:00:00, 4.71e-01  
25-Jun-2017 16:00:00, 4.71e-01  
25-Jun-2017 17:00:00, 4.80e-01  
25-Jun-2017 18:00:00, 4.82e-01  
25-Jun-2017 19:00:00, 4.82e-01  
25-Jun-2017 20:00:00, 4.83e-01  
25-Jun-2017 21:00:00, 4.83e-01  
25-Jun-2017 22:00:00, 4.84e-01  
25-Jun-2017 23:00:00, 4.84e-01  
26-Jun-2017, 4.84e-01  
26-Jun-2017 01:00:00, 4.84e-01  
26-Jun-2017 02:00:00, 4.84e-01  
26-Jun-2017 03:00:00, 4.84e-01  
26-Jun-2017 04:00:00, 4.84e-01  
26-Jun-2017 05:00:00, 4.84e-01  
26-Jun-2017 06:00:00, 4.84e-01  
26-Jun-2017 07:00:00, 4.84e-01  
26-Jun-2017 08:00:00, 4.83e-01  
26-Jun-2017 09:00:00, 4.83e-01  
26-Jun-2017 10:00:00, 4.83e-01  
26-Jun-2017 11:00:00, 4.83e-01  
26-Jun-2017 12:00:00, 4.82e-01  
26-Jun-2017 13:00:00, 4.82e-01  
26-Jun-2017 14:00:00, 4.82e-01  
26-Jun-2017 15:00:00, 4.81e-01  
26-Jun-2017 16:00:00, 4.81e-01  
26-Jun-2017 17:00:00, 4.81e-01  
26-Jun-2017 18:00:00, 4.81e-01

26-Jun-2017 19:00:00, 4.81e-01  
26-Jun-2017 20:00:00, 4.81e-01  
26-Jun-2017 21:00:00, 4.82e-01  
26-Jun-2017 22:00:00, 4.82e-01  
26-Jun-2017 23:00:00, 4.82e-01  
27-Jun-2017, 4.82e-01  
27-Jun-2017 01:00:00, 4.83e-01  
27-Jun-2017 02:00:00, 4.83e-01  
27-Jun-2017 03:00:00, 4.83e-01  
27-Jun-2017 04:00:00, 4.83e-01  
27-Jun-2017 05:00:00, 4.83e-01  
27-Jun-2017 06:00:00, 4.83e-01  
27-Jun-2017 07:00:00, 4.83e-01  
27-Jun-2017 08:00:00, 4.83e-01  
27-Jun-2017 09:00:00, 4.82e-01  
27-Jun-2017 10:00:00, 4.82e-01  
27-Jun-2017 11:00:00, 4.82e-01  
27-Jun-2017 12:00:00, 4.81e-01  
27-Jun-2017 13:00:00, 4.81e-01  
27-Jun-2017 14:00:00, 4.81e-01  
27-Jun-2017 15:00:00, 4.81e-01  
27-Jun-2017 16:00:00, 4.81e-01  
27-Jun-2017 17:00:00, 4.80e-01  
27-Jun-2017 18:00:00, 4.79e-01  
27-Jun-2017 19:00:00, 4.79e-01  
27-Jun-2017 20:00:00, 4.80e-01  
27-Jun-2017 21:00:00, 4.80e-01  
27-Jun-2017 22:00:00, 4.81e-01  
27-Jun-2017 23:00:00, 4.80e-01  
28-Jun-2017, 4.81e-01  
28-Jun-2017 01:00:00, 4.81e-01  
28-Jun-2017 02:00:00, 4.81e-01  
28-Jun-2017 03:00:00, 4.81e-01  
28-Jun-2017 04:00:00, 4.81e-01  
28-Jun-2017 05:00:00, 4.81e-01  
28-Jun-2017 06:00:00, 4.81e-01  
28-Jun-2017 07:00:00, 4.81e-01  
28-Jun-2017 08:00:00, 4.80e-01  
28-Jun-2017 09:00:00, 4.81e-01  
28-Jun-2017 10:00:00, 4.81e-01  
28-Jun-2017 11:00:00, 4.80e-01  
28-Jun-2017 12:00:00, 4.79e-01  
28-Jun-2017 13:00:00, 4.78e-01  
28-Jun-2017 14:00:00, 4.78e-01  
28-Jun-2017 15:00:00, 4.74e-01  
28-Jun-2017 16:00:00, 4.74e-01  
28-Jun-2017 17:00:00, 4.73e-01  
28-Jun-2017 18:00:00, 4.72e-01  
28-Jun-2017 19:00:00, 4.72e-01  
28-Jun-2017 20:00:00, 4.72e-01  
28-Jun-2017 21:00:00, 4.73e-01  
28-Jun-2017 22:00:00, 4.74e-01  
28-Jun-2017 23:00:00, 4.74e-01  
29-Jun-2017, 4.74e-01  
29-Jun-2017 01:00:00, 4.74e-01  
29-Jun-2017 02:00:00, 4.74e-01  
29-Jun-2017 03:00:00, 4.74e-01  
29-Jun-2017 04:00:00, 4.74e-01  
29-Jun-2017 05:00:00, 4.74e-01  
29-Jun-2017 06:00:00, 4.74e-01  
29-Jun-2017 07:00:00, 4.75e-01  
29-Jun-2017 08:00:00, 4.74e-01  
29-Jun-2017 09:00:00, 4.75e-01  
29-Jun-2017 10:00:00, 4.74e-01

29-Jun-2017 11:00:00, 4.74e-01  
29-Jun-2017 12:00:00, 4.74e-01  
29-Jun-2017 13:00:00, 4.73e-01  
29-Jun-2017 14:00:00, 4.72e-01  
29-Jun-2017 15:00:00, 4.71e-01  
29-Jun-2017 16:00:00, 4.71e-01  
29-Jun-2017 17:00:00, 4.71e-01  
29-Jun-2017 18:00:00, 4.70e-01  
29-Jun-2017 19:00:00, 4.71e-01  
29-Jun-2017 20:00:00, 4.71e-01  
29-Jun-2017 21:00:00, 4.71e-01  
29-Jun-2017 22:00:00, 4.71e-01  
29-Jun-2017 23:00:00, 4.71e-01  
30-Jun-2017, 4.71e-01  
30-Jun-2017 01:00:00, 4.71e-01  
30-Jun-2017 02:00:00, 4.72e-01  
30-Jun-2017 03:00:00, 4.72e-01  
30-Jun-2017 04:00:00, 4.72e-01  
30-Jun-2017 05:00:00, 4.72e-01  
30-Jun-2017 06:00:00, 4.73e-01  
30-Jun-2017 07:00:00, 4.73e-01  
30-Jun-2017 08:00:00, 4.73e-01  
30-Jun-2017 09:00:00, 4.73e-01  
30-Jun-2017 10:00:00, 4.72e-01  
30-Jun-2017 11:00:00, 4.71e-01  
30-Jun-2017 12:00:00, 4.71e-01  
30-Jun-2017 13:00:00, 4.70e-01  
30-Jun-2017 14:00:00, 4.69e-01  
30-Jun-2017 15:00:00, 4.69e-01  
30-Jun-2017 16:00:00, 4.69e-01  
30-Jun-2017 17:00:00, 4.68e-01  
30-Jun-2017 18:00:00, 4.68e-01  
30-Jun-2017 19:00:00, 4.68e-01  
30-Jun-2017 20:00:00, 4.69e-01  
30-Jun-2017 21:00:00, 4.70e-01  
30-Jun-2017 22:00:00, 4.70e-01  
30-Jun-2017 23:00:00, 4.70e-01  
01-Jul-2017, 4.71e-01  
01-Jul-2017 01:00:00, 4.71e-01  
01-Jul-2017 02:00:00, 4.71e-01  
01-Jul-2017 03:00:00, 4.71e-01  
01-Jul-2017 04:00:00, 4.71e-01  
01-Jul-2017 05:00:00, 4.71e-01  
01-Jul-2017 06:00:00, 4.72e-01  
01-Jul-2017 07:00:00, 4.71e-01  
01-Jul-2017 08:00:00, 4.69e-01  
01-Jul-2017 09:00:00, 4.71e-01  
01-Jul-2017 10:00:00, 4.71e-01  
01-Jul-2017 11:00:00, 4.71e-01  
01-Jul-2017 12:00:00, 4.69e-01  
01-Jul-2017 13:00:00, 4.68e-01  
01-Jul-2017 14:00:00, 4.68e-01  
01-Jul-2017 15:00:00, 4.68e-01  
01-Jul-2017 16:00:00, 4.68e-01  
01-Jul-2017 17:00:00, 4.68e-01  
01-Jul-2017 18:00:00, 4.68e-01  
01-Jul-2017 19:00:00, 4.68e-01  
01-Jul-2017 20:00:00, 4.68e-01  
01-Jul-2017 21:00:00, 4.68e-01  
01-Jul-2017 22:00:00, 4.68e-01  
01-Jul-2017 23:00:00, 4.68e-01  
02-Jul-2017, 4.68e-01  
02-Jul-2017 01:00:00, 4.68e-01  
02-Jul-2017 02:00:00, 4.69e-01

02-Jul-2017 03:00:00, 4.69e-01  
02-Jul-2017 04:00:00, 4.69e-01  
02-Jul-2017 05:00:00, 4.69e-01  
02-Jul-2017 06:00:00, 4.70e-01  
02-Jul-2017 07:00:00, 4.69e-01  
02-Jul-2017 08:00:00, 4.67e-01  
02-Jul-2017 09:00:00, 4.69e-01  
02-Jul-2017 10:00:00, 4.69e-01  
02-Jul-2017 11:00:00, 4.68e-01  
02-Jul-2017 12:00:00, 4.68e-01  
02-Jul-2017 13:00:00, 4.67e-01  
02-Jul-2017 14:00:00, 4.67e-01  
02-Jul-2017 15:00:00, 4.68e-01  
02-Jul-2017 16:00:00, 4.67e-01  
02-Jul-2017 17:00:00, 4.67e-01  
02-Jul-2017 18:00:00, 4.67e-01  
02-Jul-2017 19:00:00, 4.68e-01  
02-Jul-2017 20:00:00, 4.67e-01  
02-Jul-2017 21:00:00, 4.65e-01  
02-Jul-2017 22:00:00, 4.65e-01  
02-Jul-2017 23:00:00, 4.65e-01  
03-Jul-2017, 4.65e-01  
03-Jul-2017 01:00:00, 4.65e-01  
03-Jul-2017 02:00:00, 4.65e-01  
03-Jul-2017 03:00:00, 4.65e-01  
03-Jul-2017 04:00:00, 4.65e-01  
03-Jul-2017 05:00:00, 4.65e-01  
03-Jul-2017 06:00:00, 4.65e-01  
03-Jul-2017 07:00:00, 4.66e-01  
03-Jul-2017 08:00:00, 4.68e-01  
03-Jul-2017 09:00:00, 4.68e-01  
03-Jul-2017 10:00:00, 4.69e-01  
03-Jul-2017 11:00:00, 4.68e-01  
03-Jul-2017 12:00:00, 4.68e-01  
03-Jul-2017 13:00:00, 4.67e-01  
03-Jul-2017 14:00:00, 4.67e-01  
03-Jul-2017 15:00:00, 4.66e-01  
03-Jul-2017 16:00:00, 4.66e-01  
03-Jul-2017 17:00:00, 4.66e-01  
03-Jul-2017 18:00:00, 4.65e-01  
03-Jul-2017 19:00:00, 4.64e-01  
03-Jul-2017 20:00:00, 4.65e-01  
03-Jul-2017 21:00:00, 4.65e-01  
03-Jul-2017 22:00:00, 4.66e-01  
03-Jul-2017 23:00:00, 4.67e-01  
04-Jul-2017, 4.67e-01  
04-Jul-2017 01:00:00, 4.67e-01  
04-Jul-2017 02:00:00, 4.67e-01  
04-Jul-2017 03:00:00, 4.67e-01  
04-Jul-2017 04:00:00, 4.67e-01  
04-Jul-2017 05:00:00, 4.67e-01  
04-Jul-2017 06:00:00, 4.67e-01  
04-Jul-2017 07:00:00, 4.67e-01  
04-Jul-2017 08:00:00, 4.67e-01  
04-Jul-2017 09:00:00, 4.67e-01  
04-Jul-2017 10:00:00, 4.67e-01  
04-Jul-2017 11:00:00, 4.66e-01  
04-Jul-2017 12:00:00, 4.65e-01  
04-Jul-2017 13:00:00, 4.64e-01  
04-Jul-2017 14:00:00, 4.64e-01  
04-Jul-2017 15:00:00, 4.64e-01  
04-Jul-2017 16:00:00, 4.64e-01  
04-Jul-2017 17:00:00, 4.63e-01  
04-Jul-2017 18:00:00, 4.62e-01



04-Jul-2017 19:00:00, 4.62e-01  
04-Jul-2017 20:00:00, 4.62e-01  
04-Jul-2017 21:00:00, 4.64e-01  
04-Jul-2017 22:00:00, 4.64e-01  
04-Jul-2017 23:00:00, 4.65e-01  
05-Jul-2017, 4.65e-01  
05-Jul-2017 01:00:00, 4.66e-01  
05-Jul-2017 02:00:00, 4.66e-01  
05-Jul-2017 03:00:00, 4.66e-01  
05-Jul-2017 04:00:00, 4.66e-01  
05-Jul-2017 05:00:00, 4.66e-01  
05-Jul-2017 06:00:00, 4.67e-01  
05-Jul-2017 07:00:00, 4.67e-01  
05-Jul-2017 08:00:00, 4.65e-01  
05-Jul-2017 09:00:00, 4.67e-01  
05-Jul-2017 10:00:00, 4.66e-01  
05-Jul-2017 11:00:00, 4.65e-01  
05-Jul-2017 12:00:00, 4.64e-01  
05-Jul-2017 13:00:00, 4.64e-01  
05-Jul-2017 14:00:00, 4.62e-01  
05-Jul-2017 15:00:00, 4.61e-01  
05-Jul-2017 16:00:00, 4.61e-01  
05-Jul-2017 17:00:00, 4.61e-01  
05-Jul-2017 18:00:00, 4.62e-01  
05-Jul-2017 19:00:00, 4.63e-01  
05-Jul-2017 20:00:00, 4.63e-01  
05-Jul-2017 21:00:00, 4.63e-01  
05-Jul-2017 22:00:00, 4.64e-01  
05-Jul-2017 23:00:00, 4.64e-01  
06-Jul-2017, 4.64e-01  
06-Jul-2017 01:00:00, 4.65e-01  
06-Jul-2017 02:00:00, 4.65e-01  
06-Jul-2017 03:00:00, 4.65e-01  
06-Jul-2017 04:00:00, 4.65e-01  
06-Jul-2017 05:00:00, 4.64e-01  
06-Jul-2017 06:00:00, 4.64e-01  
06-Jul-2017 07:00:00, 4.64e-01  
06-Jul-2017 08:00:00, 4.65e-01  
06-Jul-2017 09:00:00, 4.65e-01  
06-Jul-2017 10:00:00, 4.64e-01  
06-Jul-2017 11:00:00, 4.64e-01  
06-Jul-2017 12:00:00, 4.62e-01  
06-Jul-2017 13:00:00, 4.61e-01  
06-Jul-2017 14:00:00, 4.61e-01  
06-Jul-2017 15:00:00, 4.61e-01  
06-Jul-2017 16:00:00, 4.61e-01  
06-Jul-2017 17:00:00, 4.61e-01  
06-Jul-2017 18:00:00, 4.60e-01  
06-Jul-2017 19:00:00, 4.58e-01  
06-Jul-2017 20:00:00, 4.61e-01  
06-Jul-2017 21:00:00, 4.61e-01  
06-Jul-2017 22:00:00, 4.61e-01  
06-Jul-2017 23:00:00, 4.61e-01  
07-Jul-2017, 4.61e-01  
07-Jul-2017 01:00:00, 4.61e-01  
07-Jul-2017 02:00:00, 4.61e-01  
07-Jul-2017 03:00:00, 4.61e-01  
07-Jul-2017 04:00:00, 4.61e-01  
07-Jul-2017 05:00:00, 4.61e-01  
07-Jul-2017 06:00:00, 4.61e-01  
07-Jul-2017 07:00:00, 4.60e-01  
07-Jul-2017 08:00:00, 4.61e-01  
07-Jul-2017 09:00:00, 4.61e-01  
07-Jul-2017 10:00:00, 4.61e-01

07-Jul-2017 11:00:00, 4.60e-01  
07-Jul-2017 12:00:00, 4.58e-01  
07-Jul-2017 13:00:00, 4.58e-01  
07-Jul-2017 14:00:00, 4.58e-01  
07-Jul-2017 15:00:00, 4.58e-01  
07-Jul-2017 16:00:00, 4.58e-01  
07-Jul-2017 17:00:00, 4.58e-01  
07-Jul-2017 18:00:00, 4.58e-01  
07-Jul-2017 19:00:00, 4.58e-01  
07-Jul-2017 20:00:00, 4.58e-01  
07-Jul-2017 21:00:00, 4.58e-01  
07-Jul-2017 22:00:00, 4.58e-01  
07-Jul-2017 23:00:00, 4.58e-01  
08-Jul-2017, 4.58e-01  
08-Jul-2017 01:00:00, 4.58e-01  
08-Jul-2017 02:00:00, 4.58e-01  
08-Jul-2017 03:00:00, 4.58e-01  
08-Jul-2017 04:00:00, 4.57e-01  
08-Jul-2017 05:00:00, 4.57e-01  
08-Jul-2017 06:00:00, 4.57e-01  
08-Jul-2017 07:00:00, 4.56e-01  
08-Jul-2017 08:00:00, 4.57e-01  
08-Jul-2017 09:00:00, 4.58e-01  
08-Jul-2017 10:00:00, 4.58e-01  
08-Jul-2017 11:00:00, 4.57e-01  
08-Jul-2017 12:00:00, 4.56e-01  
08-Jul-2017 13:00:00, 4.55e-01  
08-Jul-2017 14:00:00, 4.55e-01  
08-Jul-2017 15:00:00, 4.55e-01  
08-Jul-2017 16:00:00, 4.55e-01  
08-Jul-2017 17:00:00, 4.56e-01  
08-Jul-2017 18:00:00, 4.55e-01  
08-Jul-2017 19:00:00, 4.55e-01  
08-Jul-2017 20:00:00, 4.55e-01  
08-Jul-2017 21:00:00, 4.56e-01  
08-Jul-2017 22:00:00, 4.56e-01  
08-Jul-2017 23:00:00, 4.57e-01  
09-Jul-2017, 4.57e-01  
09-Jul-2017 01:00:00, 4.56e-01  
09-Jul-2017 02:00:00, 4.57e-01  
09-Jul-2017 03:00:00, 4.57e-01  
09-Jul-2017 04:00:00, 4.56e-01  
09-Jul-2017 05:00:00, 4.56e-01  
09-Jul-2017 06:00:00, 4.56e-01  
09-Jul-2017 07:00:00, 4.55e-01  
09-Jul-2017 08:00:00, 4.55e-01  
09-Jul-2017 09:00:00, 4.56e-01  
09-Jul-2017 10:00:00, 4.55e-01  
09-Jul-2017 11:00:00, 4.55e-01  
09-Jul-2017 12:00:00, 4.55e-01  
09-Jul-2017 13:00:00, 4.54e-01  
09-Jul-2017 14:00:00, 4.54e-01  
09-Jul-2017 15:00:00, 4.54e-01  
09-Jul-2017 16:00:00, 4.53e-01  
09-Jul-2017 17:00:00, 4.52e-01  
09-Jul-2017 18:00:00, 4.53e-01  
09-Jul-2017 19:00:00, 4.53e-01  
09-Jul-2017 20:00:00, 4.53e-01  
09-Jul-2017 21:00:00, 4.54e-01  
09-Jul-2017 22:00:00, 4.54e-01  
09-Jul-2017 23:00:00, 4.54e-01  
10-Jul-2017, 4.54e-01  
10-Jul-2017 01:00:00, 4.55e-01  
10-Jul-2017 02:00:00, 4.55e-01

10-Jul-2017 03:00:00, 4.54e-01  
10-Jul-2017 04:00:00, 4.54e-01  
10-Jul-2017 05:00:00, 4.54e-01  
10-Jul-2017 06:00:00, 4.54e-01  
10-Jul-2017 07:00:00, 4.54e-01  
10-Jul-2017 08:00:00, 4.54e-01  
10-Jul-2017 09:00:00, 4.54e-01  
10-Jul-2017 10:00:00, 4.54e-01  
10-Jul-2017 11:00:00, 4.52e-01  
10-Jul-2017 12:00:00, 4.52e-01  
10-Jul-2017 13:00:00, 4.52e-01  
10-Jul-2017 14:00:00, 4.51e-01  
10-Jul-2017 15:00:00, 4.51e-01  
10-Jul-2017 16:00:00, 4.51e-01  
10-Jul-2017 17:00:00, 4.51e-01  
10-Jul-2017 18:00:00, 4.51e-01  
10-Jul-2017 19:00:00, 4.51e-01  
10-Jul-2017 20:00:00, 4.52e-01  
10-Jul-2017 21:00:00, 4.51e-01  
10-Jul-2017 22:00:00, 4.52e-01  
10-Jul-2017 23:00:00, 4.52e-01  
11-Jul-2017, 4.52e-01  
11-Jul-2017 01:00:00, 4.52e-01  
11-Jul-2017 02:00:00, 4.52e-01  
11-Jul-2017 03:00:00, 4.52e-01  
11-Jul-2017 04:00:00, 4.52e-01  
11-Jul-2017 05:00:00, 4.52e-01  
11-Jul-2017 06:00:00, 4.51e-01  
11-Jul-2017 07:00:00, 4.51e-01  
11-Jul-2017 08:00:00, 4.52e-01  
11-Jul-2017 09:00:00, 4.52e-01  
11-Jul-2017 10:00:00, 4.52e-01  
11-Jul-2017 11:00:00, 4.52e-01  
11-Jul-2017 12:00:00, 4.51e-01  
11-Jul-2017 13:00:00, 4.51e-01  
11-Jul-2017 14:00:00, 4.51e-01  
11-Jul-2017 15:00:00, 4.50e-01  
11-Jul-2017 16:00:00, 4.51e-01  
11-Jul-2017 17:00:00, 4.51e-01  
11-Jul-2017 18:00:00, 4.51e-01  
11-Jul-2017 19:00:00, 4.51e-01  
11-Jul-2017 20:00:00, 4.51e-01  
11-Jul-2017 21:00:00, 4.51e-01  
11-Jul-2017 22:00:00, 4.51e-01  
11-Jul-2017 23:00:00, 4.51e-01  
12-Jul-2017, 4.50e-01  
12-Jul-2017 01:00:00, 4.48e-01  
12-Jul-2017 02:00:00, 4.49e-01  
12-Jul-2017 03:00:00, 4.52e-01  
12-Jul-2017 04:00:00, 4.53e-01  
12-Jul-2017 05:00:00, 4.54e-01  
12-Jul-2017 06:00:00, 4.54e-01  
12-Jul-2017 07:00:00, 4.55e-01  
12-Jul-2017 08:00:00, 4.55e-01  
12-Jul-2017 09:00:00, 4.54e-01  
12-Jul-2017 10:00:00, 4.51e-01  
12-Jul-2017 11:00:00, 4.53e-01  
12-Jul-2017 12:00:00, 4.53e-01  
12-Jul-2017 13:00:00, 4.53e-01  
12-Jul-2017 14:00:00, 4.52e-01  
12-Jul-2017 15:00:00, 4.51e-01  
12-Jul-2017 16:00:00, 4.51e-01  
12-Jul-2017 17:00:00, 4.52e-01  
12-Jul-2017 18:00:00, 4.53e-01

12-Jul-2017 19:00:00, 4.54e-01  
12-Jul-2017 20:00:00, 4.54e-01  
12-Jul-2017 21:00:00, 4.55e-01  
12-Jul-2017 22:00:00, 4.55e-01  
12-Jul-2017 23:00:00, 4.55e-01  
13-Jul-2017, 4.55e-01  
13-Jul-2017 01:00:00, 4.55e-01  
13-Jul-2017 02:00:00, 4.55e-01  
13-Jul-2017 03:00:00, 4.55e-01  
13-Jul-2017 04:00:00, 4.54e-01  
13-Jul-2017 05:00:00, 4.54e-01  
13-Jul-2017 06:00:00, 4.54e-01  
13-Jul-2017 07:00:00, 4.54e-01  
13-Jul-2017 08:00:00, 4.55e-01  
13-Jul-2017 09:00:00, 4.55e-01  
13-Jul-2017 10:00:00, 4.53e-01  
13-Jul-2017 11:00:00, 4.54e-01  
13-Jul-2017 12:00:00, 4.53e-01  
13-Jul-2017 13:00:00, 4.52e-01  
13-Jul-2017 14:00:00, 4.52e-01  
13-Jul-2017 15:00:00, 4.52e-01  
13-Jul-2017 16:00:00, 4.52e-01  
13-Jul-2017 17:00:00, 4.52e-01  
13-Jul-2017 18:00:00, 4.53e-01  
13-Jul-2017 19:00:00, 4.53e-01  
13-Jul-2017 20:00:00, 4.50e-01  
13-Jul-2017 21:00:00, 4.50e-01  
13-Jul-2017 22:00:00, 4.50e-01  
13-Jul-2017 23:00:00, 4.50e-01  
14-Jul-2017, 4.50e-01  
14-Jul-2017 01:00:00, 4.51e-01  
14-Jul-2017 02:00:00, 4.50e-01  
14-Jul-2017 03:00:00, 4.51e-01  
14-Jul-2017 04:00:00, 4.51e-01  
14-Jul-2017 05:00:00, 4.51e-01  
14-Jul-2017 06:00:00, 4.51e-01  
14-Jul-2017 07:00:00, 4.52e-01  
14-Jul-2017 08:00:00, 4.51e-01  
14-Jul-2017 09:00:00, 4.53e-01  
14-Jul-2017 10:00:00, 4.54e-01  
14-Jul-2017 11:00:00, 4.53e-01  
14-Jul-2017 12:00:00, 4.52e-01  
14-Jul-2017 13:00:00, 4.52e-01  
14-Jul-2017 14:00:00, 4.51e-01  
14-Jul-2017 15:00:00, 4.51e-01  
14-Jul-2017 16:00:00, 4.55e-01  
14-Jul-2017 17:00:00, 4.55e-01  
14-Jul-2017 18:00:00, 4.55e-01  
14-Jul-2017 19:00:00, 4.55e-01  
14-Jul-2017 20:00:00, 4.55e-01  
14-Jul-2017 21:00:00, 4.56e-01  
14-Jul-2017 22:00:00, 4.56e-01  
14-Jul-2017 23:00:00, 4.57e-01  
15-Jul-2017, 4.57e-01  
15-Jul-2017 01:00:00, 4.56e-01  
15-Jul-2017 02:00:00, 4.56e-01  
15-Jul-2017 03:00:00, 4.55e-01  
15-Jul-2017 04:00:00, 4.55e-01  
15-Jul-2017 05:00:00, 4.55e-01  
15-Jul-2017 06:00:00, 4.55e-01  
15-Jul-2017 07:00:00, 4.54e-01  
15-Jul-2017 08:00:00, 4.55e-01  
15-Jul-2017 09:00:00, 4.54e-01  
15-Jul-2017 10:00:00, 4.55e-01

15-Jul-2017 11:00:00, 4.55e-01  
15-Jul-2017 12:00:00, 4.54e-01  
15-Jul-2017 13:00:00, 4.53e-01  
15-Jul-2017 14:00:00, 4.52e-01  
15-Jul-2017 15:00:00, 4.51e-01  
15-Jul-2017 16:00:00, 4.51e-01  
15-Jul-2017 17:00:00, 4.51e-01  
15-Jul-2017 18:00:00, 4.51e-01  
15-Jul-2017 19:00:00, 4.51e-01  
15-Jul-2017 20:00:00, 4.51e-01  
15-Jul-2017 21:00:00, 4.52e-01  
15-Jul-2017 22:00:00, 4.52e-01  
15-Jul-2017 23:00:00, 4.52e-01  
16-Jul-2017, 4.52e-01  
16-Jul-2017 01:00:00, 4.52e-01  
16-Jul-2017 02:00:00, 4.52e-01  
16-Jul-2017 03:00:00, 4.52e-01  
16-Jul-2017 04:00:00, 4.52e-01  
16-Jul-2017 05:00:00, 4.52e-01  
16-Jul-2017 06:00:00, 4.52e-01  
16-Jul-2017 07:00:00, 4.51e-01  
16-Jul-2017 08:00:00, 4.51e-01  
16-Jul-2017 09:00:00, 4.52e-01  
16-Jul-2017 10:00:00, 4.51e-01  
16-Jul-2017 11:00:00, 4.51e-01  
16-Jul-2017 12:00:00, 4.51e-01  
16-Jul-2017 13:00:00, 4.50e-01  
16-Jul-2017 14:00:00, 4.50e-01  
16-Jul-2017 15:00:00, 4.49e-01  
16-Jul-2017 16:00:00, 4.49e-01  
16-Jul-2017 17:00:00, 4.49e-01  
16-Jul-2017 18:00:00, 4.49e-01  
16-Jul-2017 19:00:00, 4.49e-01  
16-Jul-2017 20:00:00, 4.50e-01  
16-Jul-2017 21:00:00, 4.50e-01  
16-Jul-2017 22:00:00, 4.50e-01  
16-Jul-2017 23:00:00, 4.51e-01  
17-Jul-2017, 4.51e-01  
17-Jul-2017 01:00:00, 4.50e-01  
17-Jul-2017 02:00:00, 4.50e-01  
17-Jul-2017 03:00:00, 4.50e-01  
17-Jul-2017 04:00:00, 4.50e-01  
17-Jul-2017 05:00:00, 4.50e-01  
17-Jul-2017 06:00:00, 4.48e-01  
17-Jul-2017 07:00:00, 4.48e-01  
17-Jul-2017 08:00:00, 4.48e-01  
17-Jul-2017 09:00:00, 4.50e-01  
17-Jul-2017 10:00:00, 4.50e-01  
17-Jul-2017 11:00:00, 4.49e-01  
17-Jul-2017 12:00:00, 4.49e-01  
17-Jul-2017 13:00:00, 4.48e-01  
17-Jul-2017 14:00:00, 4.44e-01  
17-Jul-2017 15:00:00, 4.42e-01  
17-Jul-2017 16:00:00, 4.41e-01  
17-Jul-2017 17:00:00, 4.38e-01  
17-Jul-2017 18:00:00, 4.34e-01  
17-Jul-2017 19:00:00, 4.32e-01  
17-Jul-2017 20:00:00, 4.32e-01  
17-Jul-2017 21:00:00, 4.33e-01  
17-Jul-2017 22:00:00, 4.32e-01  
17-Jul-2017 23:00:00, 4.32e-01  
18-Jul-2017, 4.31e-01  
18-Jul-2017 01:00:00, 4.31e-01  
18-Jul-2017 02:00:00, 4.31e-01

18-Jul-2017 03:00:00, 4.31e-01  
18-Jul-2017 04:00:00, 4.30e-01  
18-Jul-2017 05:00:00, 4.30e-01  
18-Jul-2017 06:00:00, 4.30e-01  
18-Jul-2017 07:00:00, 4.30e-01  
18-Jul-2017 08:00:00, 4.30e-01  
18-Jul-2017 09:00:00, 4.31e-01  
18-Jul-2017 10:00:00, 4.32e-01  
18-Jul-2017 11:00:00, 4.31e-01  
18-Jul-2017 12:00:00, 4.30e-01  
18-Jul-2017 13:00:00, 4.30e-01  
18-Jul-2017 14:00:00, 4.30e-01  
18-Jul-2017 15:00:00, 4.30e-01  
18-Jul-2017 16:00:00, 4.30e-01  
18-Jul-2017 17:00:00, 4.30e-01  
18-Jul-2017 18:00:00, 4.29e-01  
18-Jul-2017 19:00:00, 4.26e-01  
18-Jul-2017 20:00:00, 4.26e-01  
18-Jul-2017 21:00:00, 4.27e-01  
18-Jul-2017 22:00:00, 4.26e-01  
18-Jul-2017 23:00:00, 4.27e-01  
19-Jul-2017, 4.27e-01  
19-Jul-2017 01:00:00, 4.27e-01  
19-Jul-2017 02:00:00, 4.28e-01  
19-Jul-2017 03:00:00, 4.28e-01  
19-Jul-2017 04:00:00, 4.28e-01  
19-Jul-2017 05:00:00, 4.28e-01  
19-Jul-2017 06:00:00, 4.28e-01  
19-Jul-2017 07:00:00, 4.28e-01  
19-Jul-2017 08:00:00, 4.30e-01  
19-Jul-2017 09:00:00, 4.29e-01  
19-Jul-2017 10:00:00, 4.28e-01  
19-Jul-2017 11:00:00, 4.28e-01  
19-Jul-2017 12:00:00, 4.28e-01  
19-Jul-2017 13:00:00, 4.28e-01  
19-Jul-2017 14:00:00, 4.28e-01  
19-Jul-2017 15:00:00, 4.28e-01  
19-Jul-2017 16:00:00, 4.27e-01  
19-Jul-2017 17:00:00, 4.27e-01  
19-Jul-2017 18:00:00, 4.27e-01  
19-Jul-2017 19:00:00, 4.27e-01  
19-Jul-2017 20:00:00, 4.27e-01  
19-Jul-2017 21:00:00, 4.27e-01  
19-Jul-2017 22:00:00, 4.27e-01  
19-Jul-2017 23:00:00, 4.27e-01  
20-Jul-2017, 4.27e-01  
20-Jul-2017 01:00:00, 4.27e-01  
20-Jul-2017 02:00:00, 4.27e-01  
20-Jul-2017 03:00:00, 4.27e-01  
20-Jul-2017 04:00:00, 4.27e-01  
20-Jul-2017 05:00:00, 4.26e-01  
20-Jul-2017 06:00:00, 4.26e-01  
20-Jul-2017 07:00:00, 4.26e-01  
20-Jul-2017 08:00:00, 4.27e-01  
20-Jul-2017 09:00:00, 4.28e-01  
20-Jul-2017 10:00:00, 4.28e-01  
20-Jul-2017 11:00:00, 4.27e-01  
20-Jul-2017 12:00:00, 4.27e-01  
20-Jul-2017 13:00:00, 4.27e-01  
20-Jul-2017 14:00:00, 4.26e-01  
20-Jul-2017 15:00:00, 4.26e-01  
20-Jul-2017 16:00:00, 4.25e-01  
20-Jul-2017 17:00:00, 4.25e-01  
20-Jul-2017 18:00:00, 4.25e-01

20-Jul-2017 19:00:00, 4.25e-01  
20-Jul-2017 20:00:00, 4.25e-01  
20-Jul-2017 21:00:00, 4.25e-01  
20-Jul-2017 22:00:00, 4.25e-01  
20-Jul-2017 23:00:00, 4.25e-01  
21-Jul-2017, 4.25e-01  
21-Jul-2017 01:00:00, 4.25e-01  
21-Jul-2017 02:00:00, 4.25e-01  
21-Jul-2017 03:00:00, 4.25e-01  
21-Jul-2017 04:00:00, 4.25e-01  
21-Jul-2017 05:00:00, 4.25e-01  
21-Jul-2017 06:00:00, 4.25e-01  
21-Jul-2017 07:00:00, 4.25e-01  
21-Jul-2017 08:00:00, 4.25e-01  
21-Jul-2017 09:00:00, 4.25e-01  
21-Jul-2017 10:00:00, 4.25e-01  
21-Jul-2017 11:00:00, 4.25e-01  
21-Jul-2017 12:00:00, 4.25e-01  
21-Jul-2017 13:00:00, 4.25e-01  
21-Jul-2017 14:00:00, 4.22e-01  
21-Jul-2017 15:00:00, 4.21e-01  
21-Jul-2017 16:00:00, 4.21e-01  
21-Jul-2017 17:00:00, 4.20e-01  
21-Jul-2017 18:00:00, 4.21e-01  
21-Jul-2017 19:00:00, 4.21e-01  
21-Jul-2017 20:00:00, 4.19e-01  
21-Jul-2017 21:00:00, 4.19e-01  
21-Jul-2017 22:00:00, 4.19e-01  
21-Jul-2017 23:00:00, 4.19e-01  
22-Jul-2017, 4.19e-01  
22-Jul-2017 01:00:00, 4.19e-01  
22-Jul-2017 02:00:00, 4.19e-01  
22-Jul-2017 03:00:00, 4.19e-01  
22-Jul-2017 04:00:00, 4.19e-01  
22-Jul-2017 05:00:00, 4.19e-01  
22-Jul-2017 06:00:00, 4.19e-01  
22-Jul-2017 07:00:00, 4.19e-01  
22-Jul-2017 08:00:00, 4.19e-01  
22-Jul-2017 09:00:00, 4.19e-01  
22-Jul-2017 10:00:00, 4.20e-01  
22-Jul-2017 11:00:00, 4.20e-01  
22-Jul-2017 12:00:00, 4.19e-01  
22-Jul-2017 13:00:00, 4.19e-01  
22-Jul-2017 14:00:00, 4.19e-01  
22-Jul-2017 15:00:00, 4.19e-01  
22-Jul-2017 16:00:00, 4.19e-01  
22-Jul-2017 17:00:00, 4.19e-01  
22-Jul-2017 18:00:00, 4.20e-01  
22-Jul-2017 19:00:00, 4.19e-01  
22-Jul-2017 20:00:00, 4.19e-01  
22-Jul-2017 21:00:00, 4.19e-01  
22-Jul-2017 22:00:00, 4.19e-01  
22-Jul-2017 23:00:00, 4.19e-01  
23-Jul-2017, 4.19e-01  
23-Jul-2017 01:00:00, 4.19e-01  
23-Jul-2017 02:00:00, 4.19e-01  
23-Jul-2017 03:00:00, 4.19e-01  
23-Jul-2017 04:00:00, 4.19e-01  
23-Jul-2017 05:00:00, 4.19e-01  
23-Jul-2017 06:00:00, 4.19e-01  
23-Jul-2017 07:00:00, 4.19e-01  
23-Jul-2017 08:00:00, 4.19e-01  
23-Jul-2017 09:00:00, 4.19e-01  
23-Jul-2017 10:00:00, 4.19e-01

23-Jul-2017 11:00:00, 4.19e-01  
23-Jul-2017 12:00:00, 4.19e-01  
23-Jul-2017 13:00:00, 4.19e-01  
23-Jul-2017 14:00:00, 4.18e-01  
23-Jul-2017 15:00:00, 4.17e-01  
23-Jul-2017 16:00:00, 4.17e-01  
23-Jul-2017 17:00:00, 4.17e-01  
23-Jul-2017 18:00:00, 4.17e-01  
23-Jul-2017 19:00:00, 4.19e-01  
23-Jul-2017 20:00:00, 4.19e-01  
23-Jul-2017 21:00:00, 4.17e-01  
23-Jul-2017 22:00:00, 4.17e-01  
23-Jul-2017 23:00:00, 4.17e-01  
24-Jul-2017, 4.17e-01  
24-Jul-2017 01:00:00, 4.18e-01  
24-Jul-2017 02:00:00, 4.18e-01  
24-Jul-2017 03:00:00, 4.18e-01  
24-Jul-2017 04:00:00, 4.18e-01  
24-Jul-2017 05:00:00, 4.17e-01  
24-Jul-2017 06:00:00, 4.17e-01  
24-Jul-2017 07:00:00, 4.17e-01  
24-Jul-2017 08:00:00, 4.19e-01  
24-Jul-2017 09:00:00, 4.19e-01  
24-Jul-2017 10:00:00, 4.19e-01  
24-Jul-2017 11:00:00, 4.19e-01  
24-Jul-2017 12:00:00, 4.19e-01  
24-Jul-2017 13:00:00, 4.19e-01  
24-Jul-2017 14:00:00, 4.18e-01  
24-Jul-2017 15:00:00, 4.18e-01  
24-Jul-2017 16:00:00, 4.17e-01  
24-Jul-2017 17:00:00, 4.17e-01  
24-Jul-2017 18:00:00, 4.17e-01  
24-Jul-2017 19:00:00, 4.18e-01  
24-Jul-2017 20:00:00, 4.18e-01  
24-Jul-2017 21:00:00, 4.19e-01  
24-Jul-2017 22:00:00, 4.18e-01  
24-Jul-2017 23:00:00, 4.18e-01  
25-Jul-2017, 4.18e-01  
25-Jul-2017 01:00:00, 4.17e-01  
25-Jul-2017 02:00:00, 4.17e-01  
25-Jul-2017 03:00:00, 4.17e-01  
25-Jul-2017 04:00:00, 4.18e-01  
25-Jul-2017 05:00:00, 4.18e-01  
25-Jul-2017 06:00:00, 4.18e-01  
25-Jul-2017 07:00:00, 4.19e-01  
25-Jul-2017 08:00:00, 4.19e-01  
25-Jul-2017 09:00:00, 4.18e-01  
25-Jul-2017 10:00:00, 4.19e-01  
25-Jul-2017 11:00:00, 4.18e-01  
25-Jul-2017 12:00:00, 4.19e-01  
25-Jul-2017 13:00:00, 4.19e-01  
25-Jul-2017 14:00:00, 4.19e-01  
25-Jul-2017 15:00:00, 4.17e-01  
25-Jul-2017 16:00:00, 4.18e-01  
25-Jul-2017 17:00:00, 4.19e-01  
25-Jul-2017 18:00:00, 4.19e-01  
25-Jul-2017 19:00:00, 4.20e-01  
25-Jul-2017 20:00:00, 4.20e-01  
25-Jul-2017 21:00:00, 4.19e-01  
25-Jul-2017 22:00:00, 4.19e-01  
25-Jul-2017 23:00:00, 4.18e-01  
26-Jul-2017, 4.18e-01  
26-Jul-2017 01:00:00, 4.18e-01  
26-Jul-2017 02:00:00, 4.18e-01



26-Jul-2017 03:00:00, 4.19e-01  
26-Jul-2017 04:00:00, 4.19e-01  
26-Jul-2017 05:00:00, 4.19e-01  
26-Jul-2017 06:00:00, 4.19e-01  
26-Jul-2017 07:00:00, 4.19e-01  
26-Jul-2017 08:00:00, 4.19e-01  
26-Jul-2017 09:00:00, 4.19e-01  
26-Jul-2017 10:00:00, 4.19e-01  
26-Jul-2017 11:00:00, 4.20e-01  
26-Jul-2017 12:00:00, 4.20e-01  
26-Jul-2017 13:00:00, 4.19e-01  
26-Jul-2017 14:00:00, 4.20e-01  
26-Jul-2017 15:00:00, 4.20e-01  
26-Jul-2017 16:00:00, 4.19e-01  
26-Jul-2017 17:00:00, 4.19e-01  
26-Jul-2017 18:00:00, 4.19e-01  
26-Jul-2017 19:00:00, 4.19e-01  
26-Jul-2017 20:00:00, 4.19e-01  
26-Jul-2017 21:00:00, 4.19e-01  
26-Jul-2017 22:00:00, 4.19e-01  
26-Jul-2017 23:00:00, 4.19e-01  
27-Jul-2017, 4.19e-01  
27-Jul-2017 01:00:00, 4.19e-01  
27-Jul-2017 02:00:00, 4.19e-01  
27-Jul-2017 03:00:00, 4.19e-01  
27-Jul-2017 04:00:00, 4.19e-01  
27-Jul-2017 05:00:00, 4.18e-01  
27-Jul-2017 06:00:00, 4.18e-01  
27-Jul-2017 07:00:00, 4.19e-01  
27-Jul-2017 08:00:00, 4.19e-01  
27-Jul-2017 09:00:00, 4.19e-01  
27-Jul-2017 10:00:00, 4.19e-01  
27-Jul-2017 11:00:00, 4.19e-01  
27-Jul-2017 12:00:00, 4.19e-01  
27-Jul-2017 13:00:00, 4.18e-01  
27-Jul-2017 14:00:00, 4.17e-01  
27-Jul-2017 15:00:00, 4.17e-01  
27-Jul-2017 16:00:00, 4.16e-01  
27-Jul-2017 17:00:00, 4.15e-01  
27-Jul-2017 18:00:00, 4.15e-01  
27-Jul-2017 19:00:00, 4.15e-01  
27-Jul-2017 20:00:00, 4.15e-01  
27-Jul-2017 21:00:00, 4.15e-01  
27-Jul-2017 22:00:00, 4.15e-01  
27-Jul-2017 23:00:00, 4.14e-01  
28-Jul-2017, 4.15e-01  
28-Jul-2017 01:00:00, 4.14e-01  
28-Jul-2017 02:00:00, 4.14e-01  
28-Jul-2017 03:00:00, 4.14e-01  
28-Jul-2017 04:00:00, 4.14e-01  
28-Jul-2017 05:00:00, 4.14e-01  
28-Jul-2017 06:00:00, 4.13e-01  
28-Jul-2017 07:00:00, 4.13e-01  
28-Jul-2017 08:00:00, 4.13e-01  
28-Jul-2017 09:00:00, 4.14e-01  
28-Jul-2017 10:00:00, 4.14e-01  
28-Jul-2017 11:00:00, 4.14e-01  
28-Jul-2017 12:00:00, 4.14e-01  
28-Jul-2017 13:00:00, 4.14e-01  
28-Jul-2017 14:00:00, 4.14e-01  
28-Jul-2017 15:00:00, 4.13e-01  
28-Jul-2017 16:00:00, 4.15e-01  
28-Jul-2017 17:00:00, 4.14e-01  
28-Jul-2017 18:00:00, 4.14e-01

28-Jul-2017 19:00:00, 4.14e-01  
28-Jul-2017 20:00:00, 4.14e-01  
28-Jul-2017 21:00:00, 4.14e-01  
28-Jul-2017 22:00:00, 4.14e-01  
28-Jul-2017 23:00:00, 4.13e-01  
29-Jul-2017, 4.13e-01  
29-Jul-2017 01:00:00, 4.13e-01  
29-Jul-2017 02:00:00, 4.14e-01  
29-Jul-2017 03:00:00, 4.14e-01  
29-Jul-2017 04:00:00, 4.14e-01  
29-Jul-2017 05:00:00, 4.14e-01  
29-Jul-2017 06:00:00, 4.14e-01  
29-Jul-2017 07:00:00, 4.14e-01  
29-Jul-2017 08:00:00, 4.14e-01  
29-Jul-2017 09:00:00, 4.14e-01  
29-Jul-2017 10:00:00, 4.14e-01  
29-Jul-2017 11:00:00, 4.16e-01  
29-Jul-2017 12:00:00, 4.15e-01  
29-Jul-2017 13:00:00, 4.16e-01  
29-Jul-2017 14:00:00, 4.17e-01  
29-Jul-2017 15:00:00, 4.16e-01  
29-Jul-2017 16:00:00, 4.16e-01  
29-Jul-2017 17:00:00, 4.16e-01  
29-Jul-2017 18:00:00, 4.16e-01  
29-Jul-2017 19:00:00, 4.15e-01  
29-Jul-2017 20:00:00, 4.14e-01  
29-Jul-2017 21:00:00, 4.12e-01  
29-Jul-2017 22:00:00, 4.13e-01  
29-Jul-2017 23:00:00, 4.13e-01  
30-Jul-2017, 4.14e-01  
30-Jul-2017 01:00:00, 4.14e-01  
30-Jul-2017 02:00:00, 4.14e-01  
30-Jul-2017 03:00:00, 4.14e-01  
30-Jul-2017 04:00:00, 4.14e-01  
30-Jul-2017 05:00:00, 4.14e-01  
30-Jul-2017 06:00:00, 4.14e-01  
30-Jul-2017 07:00:00, 4.12e-01  
30-Jul-2017 08:00:00, 4.13e-01  
30-Jul-2017 09:00:00, 4.16e-01  
30-Jul-2017 10:00:00, 4.16e-01  
30-Jul-2017 11:00:00, 4.17e-01  
30-Jul-2017 12:00:00, 4.16e-01  
30-Jul-2017 13:00:00, 4.16e-01  
30-Jul-2017 14:00:00, 4.15e-01  
30-Jul-2017 15:00:00, 4.14e-01  
30-Jul-2017 16:00:00, 4.14e-01  
30-Jul-2017 17:00:00, 4.14e-01  
30-Jul-2017 18:00:00, 4.14e-01  
30-Jul-2017 19:00:00, 4.14e-01  
30-Jul-2017 20:00:00, 4.14e-01  
30-Jul-2017 21:00:00, 4.14e-01  
30-Jul-2017 22:00:00, 4.13e-01  
30-Jul-2017 23:00:00, 4.13e-01  
31-Jul-2017, 4.13e-01  
31-Jul-2017 01:00:00, 4.13e-01  
31-Jul-2017 02:00:00, 4.13e-01  
31-Jul-2017 03:00:00, 4.13e-01  
31-Jul-2017 04:00:00, 4.13e-01  
31-Jul-2017 05:00:00, 4.13e-01  
31-Jul-2017 06:00:00, 4.13e-01  
31-Jul-2017 07:00:00, 4.12e-01  
31-Jul-2017 08:00:00, 4.12e-01  
31-Jul-2017 09:00:00, 4.13e-01  
31-Jul-2017 10:00:00, 4.13e-01

31-Jul-2017 11:00:00, 4.13e-01  
31-Jul-2017 12:00:00, 4.12e-01  
31-Jul-2017 13:00:00, 4.11e-01  
31-Jul-2017 14:00:00, 4.11e-01  
31-Jul-2017 15:00:00, 4.11e-01  
31-Jul-2017 16:00:00, 4.11e-01  
31-Jul-2017 17:00:00, 4.11e-01  
31-Jul-2017 18:00:00, 4.11e-01  
31-Jul-2017 19:00:00, 4.11e-01  
31-Jul-2017 20:00:00, 4.11e-01  
31-Jul-2017 21:00:00, 4.11e-01  
31-Jul-2017 22:00:00, 4.11e-01  
31-Jul-2017 23:00:00, 4.11e-01  
01-Aug-2017, 4.11e-01  
01-Aug-2017 01:00:00, 4.10e-01  
01-Aug-2017 02:00:00, 4.10e-01  
01-Aug-2017 03:00:00, 4.10e-01  
01-Aug-2017 04:00:00, 4.09e-01  
01-Aug-2017 05:00:00, 4.09e-01  
01-Aug-2017 06:00:00, 4.09e-01  
01-Aug-2017 07:00:00, 4.09e-01  
01-Aug-2017 08:00:00, 4.10e-01  
01-Aug-2017 09:00:00, 4.10e-01  
01-Aug-2017 10:00:00, 4.11e-01  
01-Aug-2017 11:00:00, 4.10e-01  
01-Aug-2017 12:00:00, 4.10e-01  
01-Aug-2017 13:00:00, 4.09e-01  
01-Aug-2017 14:00:00, 4.09e-01  
01-Aug-2017 15:00:00, 4.09e-01  
01-Aug-2017 16:00:00, 4.09e-01  
01-Aug-2017 17:00:00, 4.09e-01  
01-Aug-2017 18:00:00, 4.09e-01  
01-Aug-2017 19:00:00, 4.09e-01  
01-Aug-2017 20:00:00, 4.09e-01  
01-Aug-2017 21:00:00, 4.09e-01  
01-Aug-2017 22:00:00, 4.09e-01  
01-Aug-2017 23:00:00, 4.09e-01  
02-Aug-2017, 4.09e-01  
02-Aug-2017 01:00:00, 4.09e-01  
02-Aug-2017 02:00:00, 4.09e-01  
02-Aug-2017 03:00:00, 4.09e-01  
02-Aug-2017 04:00:00, 4.09e-01  
02-Aug-2017 05:00:00, 4.08e-01  
02-Aug-2017 06:00:00, 4.08e-01  
02-Aug-2017 07:00:00, 4.07e-01  
02-Aug-2017 08:00:00, 4.08e-01  
02-Aug-2017 09:00:00, 4.08e-01  
02-Aug-2017 10:00:00, 4.08e-01  
02-Aug-2017 11:00:00, 4.08e-01  
02-Aug-2017 12:00:00, 4.08e-01  
02-Aug-2017 13:00:00, 4.07e-01  
02-Aug-2017 14:00:00, 4.07e-01  
02-Aug-2017 15:00:00, 4.06e-01  
02-Aug-2017 16:00:00, 4.06e-01  
02-Aug-2017 17:00:00, 4.05e-01  
02-Aug-2017 18:00:00, 4.04e-01  
02-Aug-2017 19:00:00, 4.07e-01  
02-Aug-2017 20:00:00, 4.06e-01  
02-Aug-2017 21:00:00, 4.06e-01  
02-Aug-2017 22:00:00, 4.06e-01  
02-Aug-2017 23:00:00, 4.06e-01  
03-Aug-2017, 4.06e-01  
03-Aug-2017 01:00:00, 4.06e-01  
03-Aug-2017 02:00:00, 4.06e-01

03-Aug-2017 03:00:00, 4.06e-01  
03-Aug-2017 04:00:00, 4.06e-01  
03-Aug-2017 05:00:00, 4.06e-01  
03-Aug-2017 06:00:00, 4.06e-01  
03-Aug-2017 07:00:00, 4.07e-01  
03-Aug-2017 08:00:00, 4.08e-01  
03-Aug-2017 09:00:00, 4.09e-01  
03-Aug-2017 10:00:00, 4.04e-01  
03-Aug-2017 11:00:00, 4.04e-01  
03-Aug-2017 12:00:00, 4.07e-01  
03-Aug-2017 13:00:00, 4.08e-01  
03-Aug-2017 14:00:00, 4.08e-01  
03-Aug-2017 15:00:00, 4.07e-01  
03-Aug-2017 16:00:00, 4.07e-01  
03-Aug-2017 17:00:00, 4.07e-01  
03-Aug-2017 18:00:00, 4.07e-01  
03-Aug-2017 19:00:00, 4.06e-01  
03-Aug-2017 20:00:00, 4.06e-01  
03-Aug-2017 21:00:00, 4.06e-01  
03-Aug-2017 22:00:00, 4.06e-01  
03-Aug-2017 23:00:00, 4.06e-01  
04-Aug-2017, 4.06e-01  
04-Aug-2017 01:00:00, 4.07e-01  
04-Aug-2017 02:00:00, 4.07e-01  
04-Aug-2017 03:00:00, 4.07e-01  
04-Aug-2017 04:00:00, 4.07e-01  
04-Aug-2017 05:00:00, 4.07e-01  
04-Aug-2017 06:00:00, 4.06e-01  
04-Aug-2017 07:00:00, 4.06e-01  
04-Aug-2017 08:00:00, 4.06e-01  
04-Aug-2017 09:00:00, 4.06e-01  
04-Aug-2017 10:00:00, 4.06e-01  
04-Aug-2017 11:00:00, 4.06e-01  
04-Aug-2017 12:00:00, 4.06e-01  
04-Aug-2017 13:00:00, 4.06e-01  
04-Aug-2017 14:00:00, 4.05e-01  
04-Aug-2017 15:00:00, 4.04e-01  
04-Aug-2017 16:00:00, 4.04e-01  
04-Aug-2017 17:00:00, 4.04e-01  
04-Aug-2017 18:00:00, 4.04e-01  
04-Aug-2017 19:00:00, 4.04e-01  
04-Aug-2017 20:00:00, 4.04e-01  
04-Aug-2017 21:00:00, 4.04e-01  
04-Aug-2017 22:00:00, 4.04e-01  
04-Aug-2017 23:00:00, 4.03e-01  
05-Aug-2017, 4.03e-01  
05-Aug-2017 01:00:00, 4.03e-01  
05-Aug-2017 02:00:00, 4.03e-01  
05-Aug-2017 03:00:00, 4.03e-01  
05-Aug-2017 04:00:00, 4.03e-01  
05-Aug-2017 05:00:00, 4.03e-01  
05-Aug-2017 06:00:00, 4.03e-01  
05-Aug-2017 07:00:00, 4.03e-01  
05-Aug-2017 08:00:00, 4.03e-01  
05-Aug-2017 09:00:00, 4.03e-01  
05-Aug-2017 10:00:00, 4.02e-01  
05-Aug-2017 11:00:00, 4.02e-01  
05-Aug-2017 12:00:00, 4.02e-01  
05-Aug-2017 13:00:00, 4.01e-01  
05-Aug-2017 14:00:00, 4.01e-01  
05-Aug-2017 15:00:00, 4.01e-01  
05-Aug-2017 16:00:00, 4.00e-01  
05-Aug-2017 17:00:00, 4.00e-01  
05-Aug-2017 18:00:00, 3.99e-01

05-Aug-2017 19:00:00, 3.99e-01  
05-Aug-2017 20:00:00, 3.98e-01  
05-Aug-2017 21:00:00, 3.97e-01  
05-Aug-2017 22:00:00, 3.98e-01  
05-Aug-2017 23:00:00, 3.95e-01  
06-Aug-2017, 3.96e-01  
06-Aug-2017 01:00:00, 3.96e-01  
06-Aug-2017 02:00:00, 3.96e-01  
06-Aug-2017 03:00:00, 3.95e-01  
06-Aug-2017 04:00:00, 3.96e-01  
06-Aug-2017 05:00:00, 3.96e-01  
06-Aug-2017 06:00:00, 3.96e-01  
06-Aug-2017 07:00:00, 3.96e-01  
06-Aug-2017 08:00:00, 3.97e-01  
06-Aug-2017 09:00:00, 3.99e-01  
06-Aug-2017 10:00:00, 3.99e-01  
06-Aug-2017 11:00:00, 4.00e-01  
06-Aug-2017 12:00:00, 3.99e-01  
06-Aug-2017 13:00:00, 3.99e-01  
06-Aug-2017 14:00:00, 3.99e-01  
06-Aug-2017 15:00:00, 3.99e-01  
06-Aug-2017 16:00:00, 3.99e-01  
06-Aug-2017 17:00:00, 3.98e-01  
06-Aug-2017 18:00:00, 3.98e-01  
06-Aug-2017 19:00:00, 3.98e-01  
06-Aug-2017 20:00:00, 3.97e-01  
06-Aug-2017 21:00:00, 3.97e-01  
06-Aug-2017 22:00:00, 3.97e-01  
06-Aug-2017 23:00:00, 3.97e-01  
07-Aug-2017, 3.97e-01  
07-Aug-2017 01:00:00, 3.97e-01  
07-Aug-2017 02:00:00, 3.97e-01  
07-Aug-2017 03:00:00, 3.97e-01  
07-Aug-2017 04:00:00, 3.97e-01  
07-Aug-2017 05:00:00, 3.97e-01  
07-Aug-2017 06:00:00, 3.97e-01  
07-Aug-2017 07:00:00, 3.97e-01  
07-Aug-2017 08:00:00, 3.97e-01  
07-Aug-2017 09:00:00, 3.97e-01  
07-Aug-2017 10:00:00, 3.97e-01  
07-Aug-2017 11:00:00, 3.97e-01  
07-Aug-2017 12:00:00, 3.96e-01  
07-Aug-2017 13:00:00, 3.96e-01  
07-Aug-2017 14:00:00, 3.96e-01  
07-Aug-2017 15:00:00, 3.96e-01  
07-Aug-2017 16:00:00, 3.96e-01  
07-Aug-2017 17:00:00, 3.95e-01  
07-Aug-2017 18:00:00, 3.94e-01  
07-Aug-2017 19:00:00, 3.95e-01  
07-Aug-2017 20:00:00, 3.92e-01  
07-Aug-2017 21:00:00, 3.93e-01  
07-Aug-2017 22:00:00, 3.93e-01  
07-Aug-2017 23:00:00, 3.93e-01  
08-Aug-2017, 3.93e-01  
08-Aug-2017 01:00:00, 3.94e-01  
08-Aug-2017 02:00:00, 3.95e-01  
08-Aug-2017 03:00:00, 3.95e-01  
08-Aug-2017 04:00:00, 3.94e-01  
08-Aug-2017 05:00:00, 3.94e-01  
08-Aug-2017 06:00:00, 3.94e-01  
08-Aug-2017 07:00:00, 3.94e-01  
08-Aug-2017 08:00:00, 3.94e-01  
08-Aug-2017 09:00:00, 3.96e-01  
08-Aug-2017 10:00:00, 3.96e-01

08-Aug-2017 11:00:00, 3.96e-01  
08-Aug-2017 12:00:00, 3.96e-01  
08-Aug-2017 13:00:00, 3.96e-01  
08-Aug-2017 14:00:00, 3.94e-01  
08-Aug-2017 15:00:00, 3.96e-01  
08-Aug-2017 16:00:00, 3.96e-01  
08-Aug-2017 17:00:00, 3.96e-01  
08-Aug-2017 18:00:00, 3.94e-01  
08-Aug-2017 19:00:00, 3.94e-01  
08-Aug-2017 20:00:00, 3.93e-01  
08-Aug-2017 21:00:00, 3.92e-01  
08-Aug-2017 22:00:00, 3.92e-01  
08-Aug-2017 23:00:00, 3.92e-01  
09-Aug-2017, 3.92e-01  
09-Aug-2017 01:00:00, 3.92e-01  
09-Aug-2017 02:00:00, 3.92e-01  
09-Aug-2017 03:00:00, 3.92e-01  
09-Aug-2017 04:00:00, 3.92e-01  
09-Aug-2017 05:00:00, 3.92e-01  
09-Aug-2017 06:00:00, 3.92e-01  
09-Aug-2017 07:00:00, 3.92e-01  
09-Aug-2017 08:00:00, 3.92e-01  
09-Aug-2017 09:00:00, 3.94e-01  
09-Aug-2017 10:00:00, 3.95e-01  
09-Aug-2017 11:00:00, 3.96e-01  
09-Aug-2017 12:00:00, 3.96e-01  
09-Aug-2017 13:00:00, 3.95e-01  
09-Aug-2017 14:00:00, 3.94e-01  
09-Aug-2017 15:00:00, 3.94e-01  
09-Aug-2017 16:00:00, 3.92e-01  
09-Aug-2017 17:00:00, 3.92e-01  
09-Aug-2017 18:00:00, 3.92e-01  
09-Aug-2017 19:00:00, 3.92e-01  
09-Aug-2017 20:00:00, 3.91e-01  
09-Aug-2017 21:00:00, 3.91e-01  
09-Aug-2017 22:00:00, 3.91e-01  
09-Aug-2017 23:00:00, 3.91e-01  
10-Aug-2017, 3.91e-01  
10-Aug-2017 01:00:00, 3.91e-01  
10-Aug-2017 02:00:00, 3.91e-01  
10-Aug-2017 03:00:00, 3.90e-01  
10-Aug-2017 04:00:00, 3.90e-01  
10-Aug-2017 05:00:00, 3.90e-01  
10-Aug-2017 06:00:00, 3.89e-01  
10-Aug-2017 07:00:00, 3.89e-01  
10-Aug-2017 08:00:00, 3.88e-01  
10-Aug-2017 09:00:00, 3.89e-01  
10-Aug-2017 10:00:00, 3.91e-01  
10-Aug-2017 11:00:00, 3.91e-01  
10-Aug-2017 12:00:00, 3.90e-01  
10-Aug-2017 13:00:00, 3.90e-01  
10-Aug-2017 14:00:00, 3.90e-01  
10-Aug-2017 15:00:00, 3.89e-01  
10-Aug-2017 16:00:00, 3.89e-01  
10-Aug-2017 17:00:00, 3.88e-01  
10-Aug-2017 18:00:00, 3.88e-01  
10-Aug-2017 19:00:00, 3.88e-01  
10-Aug-2017 20:00:00, 3.87e-01  
10-Aug-2017 21:00:00, 3.87e-01  
10-Aug-2017 22:00:00, 3.87e-01  
10-Aug-2017 23:00:00, 3.87e-01  
11-Aug-2017, 3.87e-01  
11-Aug-2017 01:00:00, 3.87e-01  
11-Aug-2017 02:00:00, 3.87e-01

[illegible]

[illegible]



[illegible]

NaT, 3.64e-01  
NaT, 3.64e-01  
NaT, 3.64e-01  
NaT, 3.64e-01  
NaT, 3.64e-01  
NaT, 3.65e-01  
NaT, 3.64e-01  
NaT, 3.64e-01  
NaT, 3.64e-01  
NaT, 3.63e-01  
NaT, 3.62e-01  
NaT, 3.62e-01  
NaT, 3.62e-01  
NaT, 3.61e-01  
NaT, 3.61e-01  
NaT, 3.60e-01  
NaT, 3.60e-01  
NaT, 3.59e-01  
NaT, 3.60e-01  
NaT, 3.59e-01  
NaT, 3.59e-01  
NaT, 3.59e-01  
NaT, 3.58e-01  
NaT, 3.58e-01  
NaT, 3.57e-01  
NaT, 3.57e-01  
NaT, 3.56e-01  
NaT, 3.56e-01  
NaT, 3.55e-01  
NaT, 3.54e-01  
NaT, 3.54e-01  
NaT, 3.54e-01  
NaT, 3.54e-01  
NaT, 3.54e-01  
NaT, 3.53e-01  
NaT, 3.53e-01  
NaT, 3.54e-01  
NaT, 3.53e-01  
NaT, 3.53e-01  
NaT, 3.53e-01  
NaT, 3.52e-01  
NaT, 3.52e-01  
NaT, 3.51e-01  
NaT, 3.51e-01  
NaT, 3.50e-01

[illegible]

[illegible]

NaT, 3.28e-01  
NaT, 3.28e-01  
NaT, 3.28e-01  
NaT, 3.28e-01  
NaT, 3.28e-01  
NaT, 3.30e-01  
NaT, 3.29e-01  
NaT, 3.29e-01  
NaT, 3.29e-01  
NaT, 3.28e-01  
NaT, 3.28e-01  
NaT, 3.28e-01  
NaT, 3.27e-01  
NaT, 3.26e-01  
NaT, 3.26e-01  
NaT, 3.25e-01  
NaT, 3.25e-01  
NaT, 3.24e-01  
NaT, 3.25e-01  
NaT, 3.25e-01  
NaT, 3.25e-01  
NaT, 3.24e-01  
NaT, 3.24e-01  
NaT, 3.24e-01  
NaT, 3.24e-01  
NaT, 3.23e-01  
NaT, 3.22e-01  
NaT, 3.22e-01  
NaT, 3.21e-01  
NaT, 3.21e-01  
NaT, 3.20e-01  
NaT, 3.21e-01  
NaT, 3.20e-01  
NaT, 3.21e-01  
NaT, 3.21e-01  
NaT, 3.21e-01  
NaT, 3.20e-01  
NaT, 3.21e-01  
NaT, 3.21e-01  
NaT, 3.20e-01  
NaT, 3.19e-01  
NaT, 3.19e-01  
NaT, 3.18e-01

[illegible]

[illegible]

[illegible]



[illegible]

[illegible]

[illegible]

[illegible]

[illegible]

[illegible]

[illegible]

[illegible]



NaT, 3.11e-01  
NaT, 3.10e-01  
NaT, 3.08e-01  
NaT, 3.08e-01  
NaT, 3.08e-01  
NaT, 3.10e-01  
NaT, 3.11e-01  
NaT, 3.11e-01  
NaT, 3.11e-01  
NaT, 3.11e-01  
NaT, 3.10e-01  
NaT, 3.10e-01  
NaT, 3.11e-01  
NaT, 3.10e-01  
NaT, 3.10e-01  
NaT, 3.11e-01  
NaT, 3.11e-01  
NaT, 3.09e-01  
NaT, 3.08e-01  
NaT, 3.07e-01  
NaT, 3.07e-01  
NaT, 3.08e-01  
NaT, 3.08e-01  
NaT, 3.08e-01  
NaT, 3.08e-01  
NaT, 3.09e-01  
NaT, 3.09e-01  
NaT, 3.11e-01  
NaT, 3.11e-01  
NaT, 3.11e-01  
NaT, 3.11e-01  
NaT, 3.11e-01  
NaT, 3.10e-01  
NaT, 3.11e-01  
NaT, 3.10e-01  
NaT, 3.08e-01  
NaT, 3.08e-01  
NaT, 3.09e-01  
NaT, 3.11e-01  
NaT, 3.10e-01  
NaT, 3.11e-01  
NaT, 3.12e-01  
NaT, 3.11e-01  
NaT, 3.11e-01

[illegible]

[illegible]

[illegible]

[illegible]

[illegible]

[illegible]

[illegible]



[illegible]

[illegible]

[illegible]

NaT, 3.13e-01  
NaT, 3.14e-01  
NaT, 3.13e-01  
NaT, 3.14e-01  
NaT, 3.13e-01  
NaT, 3.14e-01  
NaT, 3.13e-01  
NaT, 3.13e-01  
NaT, 3.13e-01  
NaT, 3.13e-01  
NaT, 3.13e-01

NaT, 3.13e-01  
NaT, 3.13e-01  
NaT, 3.13e-01  
30-Oct-2017 07:00:00, 3.13e-01  
30-Oct-2017 08:00:00, 3.13e-01  
30-Oct-2017 09:00:00, 3.13e-01  
30-Oct-2017 10:00:00, 3.14e-01  
30-Oct-2017 11:00:00, 3.14e-01  
30-Oct-2017 12:00:00, 3.14e-01  
30-Oct-2017 13:00:00, 3.14e-01  
30-Oct-2017 14:00:00, 3.14e-01  
30-Oct-2017 15:00:00, 3.14e-01  
30-Oct-2017 16:00:00, 3.14e-01  
30-Oct-2017 17:00:00, 3.14e-01  
30-Oct-2017 18:00:00, 3.14e-01  
30-Oct-2017 19:00:00, 3.14e-01  
30-Oct-2017 20:00:00, 3.14e-01  
30-Oct-2017 21:00:00, 3.14e-01  
30-Oct-2017 22:00:00, 3.14e-01  
30-Oct-2017 23:00:00, 3.15e-01  
31-Oct-2017, 3.18e-01  
31-Oct-2017 01:00:00, 3.18e-01  
31-Oct-2017 02:00:00, 3.18e-01  
31-Oct-2017 03:00:00, 3.18e-01  
31-Oct-2017 04:00:00, 3.18e-01  
31-Oct-2017 05:00:00, 3.19e-01  
31-Oct-2017 06:00:00, 3.19e-01  
31-Oct-2017 07:00:00, 3.19e-01  
31-Oct-2017 08:00:00, 3.20e-01  
31-Oct-2017 09:00:00, 3.20e-01  
31-Oct-2017 10:00:00, 3.19e-01  
31-Oct-2017 11:00:00, 3.19e-01  
31-Oct-2017 12:00:00, 3.18e-01  
31-Oct-2017 13:00:00, 3.18e-01  
31-Oct-2017 14:00:00, 3.17e-01  
31-Oct-2017 15:00:00, 3.16e-01  
31-Oct-2017 16:00:00, 3.15e-01  
31-Oct-2017 17:00:00, 3.15e-01  
31-Oct-2017 18:00:00, 3.15e-01  
31-Oct-2017 19:00:00, 3.15e-01  
31-Oct-2017 20:00:00, 3.15e-01  
31-Oct-2017 21:00:00, 3.15e-01  
31-Oct-2017 22:00:00, 3.15e-01  
31-Oct-2017 23:00:00, 3.15e-01  
01-Nov-2017, NaN  
01-Nov-2017 01:00:00, NaN  
01-Nov-2017 02:00:00, NaN  
01-Nov-2017 03:00:00, NaN  
01-Nov-2017 04:00:00, NaN  
01-Nov-2017 05:00:00, NaN  
01-Nov-2017 06:00:00, NaN  
01-Nov-2017 07:00:00, NaN  
01-Nov-2017 08:00:00, NaN  
01-Nov-2017 09:00:00, NaN  
01-Nov-2017 10:00:00, NaN  
01-Nov-2017 11:00:00, NaN  
01-Nov-2017 12:00:00, NaN  
01-Nov-2017 13:00:00, NaN  
01-Nov-2017 14:00:00, NaN  
01-Nov-2017 15:00:00, NaN  
01-Nov-2017 16:00:00, NaN  
01-Nov-2017 17:00:00, NaN  
01-Nov-2017 18:00:00, NaN  
01-Nov-2017 19:00:00, NaN

|              |           |     |
|--------------|-----------|-----|
| 01-Nov-2017  | 20:00:00, | NaN |
| 01-Nov-2017  | 21:00:00, | NaN |
| 01-Nov-2017  | 22:00:00, | NaN |
| 01-Nov-2017  | 23:00:00, | NaN |
| 02-Nov-2017, |           | NaN |
| 02-Nov-2017  | 01:00:00, | NaN |
| 02-Nov-2017  | 02:00:00, | NaN |
| 02-Nov-2017  | 03:00:00, | NaN |
| 02-Nov-2017  | 04:00:00, | NaN |
| 02-Nov-2017  | 05:00:00, | NaN |
| 02-Nov-2017  | 06:00:00, | NaN |
| 02-Nov-2017  | 07:00:00, | NaN |
| 02-Nov-2017  | 08:00:00, | NaN |
| 02-Nov-2017  | 09:00:00, | NaN |
| 02-Nov-2017  | 10:00:00, | NaN |
| 02-Nov-2017  | 11:00:00, | NaN |
| 02-Nov-2017  | 12:00:00, | NaN |
| 02-Nov-2017  | 13:00:00, | NaN |
| 02-Nov-2017  | 14:00:00, | NaN |
| 02-Nov-2017  | 15:00:00, | NaN |
| 02-Nov-2017  | 16:00:00, | NaN |
| 02-Nov-2017  | 17:00:00, | NaN |
| 02-Nov-2017  | 18:00:00, | NaN |
| 02-Nov-2017  | 19:00:00, | NaN |
| 02-Nov-2017  | 20:00:00, | NaN |
| 02-Nov-2017  | 21:00:00, | NaN |
| 02-Nov-2017  | 22:00:00, | NaN |
| 02-Nov-2017  | 23:00:00, | NaN |
| 03-Nov-2017, |           | NaN |
| 03-Nov-2017  | 01:00:00, | NaN |
| 03-Nov-2017  | 02:00:00, | NaN |
| 03-Nov-2017  | 03:00:00, | NaN |
| 03-Nov-2017  | 04:00:00, | NaN |
| 03-Nov-2017  | 05:00:00, | NaN |
| 03-Nov-2017  | 06:00:00, | NaN |
| 03-Nov-2017  | 07:00:00, | NaN |
| 03-Nov-2017  | 08:00:00, | NaN |
| 03-Nov-2017  | 09:00:00, | NaN |
| 03-Nov-2017  | 10:00:00, | NaN |
| 03-Nov-2017  | 11:00:00, | NaN |
| 03-Nov-2017  | 12:00:00, | NaN |
| 03-Nov-2017  | 13:00:00, | NaN |
| 03-Nov-2017  | 14:00:00, | NaN |
| 03-Nov-2017  | 15:00:00, | NaN |
| 03-Nov-2017  | 16:00:00, | NaN |
| 03-Nov-2017  | 17:00:00, | NaN |
| 03-Nov-2017  | 18:00:00, | NaN |
| 03-Nov-2017  | 19:00:00, | NaN |
| 03-Nov-2017  | 20:00:00, | NaN |
| 03-Nov-2017  | 21:00:00, | NaN |
| 03-Nov-2017  | 22:00:00, | NaN |
| 03-Nov-2017  | 23:00:00, | NaN |
| 04-Nov-2017, |           | NaN |
| 04-Nov-2017  | 01:00:00, | NaN |
| 04-Nov-2017  | 02:00:00, | NaN |
| 04-Nov-2017  | 03:00:00, | NaN |
| 04-Nov-2017  | 04:00:00, | NaN |
| 04-Nov-2017  | 05:00:00, | NaN |
| 04-Nov-2017  | 06:00:00, | NaN |
| 04-Nov-2017  | 07:00:00, | NaN |
| 04-Nov-2017  | 08:00:00, | NaN |
| 04-Nov-2017  | 09:00:00, | NaN |
| 04-Nov-2017  | 10:00:00, | NaN |
| 04-Nov-2017  | 11:00:00, | NaN |

04-Nov-2017 12:00:00, NaN  
04-Nov-2017 13:00:00, NaN  
04-Nov-2017 14:00:00, NaN  
04-Nov-2017 15:00:00, NaN  
04-Nov-2017 16:00:00, NaN  
04-Nov-2017 17:00:00, NaN  
04-Nov-2017 18:00:00, NaN  
04-Nov-2017 19:00:00, NaN  
04-Nov-2017 20:00:00, NaN  
04-Nov-2017 21:00:00, NaN  
04-Nov-2017 22:00:00, NaN  
04-Nov-2017 23:00:00, NaN  
05-Nov-2017, NaN  
05-Nov-2017 01:00:00, NaN  
05-Nov-2017 02:00:00, NaN  
05-Nov-2017 03:00:00, NaN  
05-Nov-2017 04:00:00, NaN  
05-Nov-2017 05:00:00, NaN  
05-Nov-2017 06:00:00, NaN  
05-Nov-2017 07:00:00, NaN  
05-Nov-2017 08:00:00, NaN  
05-Nov-2017 09:00:00, NaN  
05-Nov-2017 10:00:00, NaN  
05-Nov-2017 11:00:00, NaN  
05-Nov-2017 12:00:00, NaN  
05-Nov-2017 13:00:00, NaN  
05-Nov-2017 14:00:00, NaN  
05-Nov-2017 15:00:00, NaN  
05-Nov-2017 16:00:00, NaN  
05-Nov-2017 17:00:00, NaN  
05-Nov-2017 18:00:00, NaN  
05-Nov-2017 19:00:00, NaN  
05-Nov-2017 20:00:00, NaN  
05-Nov-2017 21:00:00, NaN  
05-Nov-2017 22:00:00, NaN  
05-Nov-2017 23:00:00, NaN  
06-Nov-2017, NaN  
06-Nov-2017 01:00:00, NaN  
06-Nov-2017 02:00:00, NaN  
06-Nov-2017 03:00:00, NaN  
06-Nov-2017 04:00:00, NaN  
06-Nov-2017 05:00:00, NaN  
06-Nov-2017 06:00:00, NaN  
06-Nov-2017 07:00:00, NaN  
06-Nov-2017 08:00:00, NaN  
06-Nov-2017 09:00:00, NaN  
06-Nov-2017 10:00:00, NaN  
06-Nov-2017 11:00:00, NaN  
06-Nov-2017 12:00:00, NaN  
06-Nov-2017 13:00:00, NaN  
06-Nov-2017 14:00:00, NaN  
06-Nov-2017 15:00:00, NaN  
06-Nov-2017 16:00:00, NaN  
06-Nov-2017 17:00:00, NaN  
06-Nov-2017 18:00:00, NaN  
06-Nov-2017 19:00:00, NaN  
06-Nov-2017 20:00:00, NaN  
06-Nov-2017 21:00:00, NaN  
06-Nov-2017 22:00:00, NaN  
06-Nov-2017 23:00:00, NaN  
07-Nov-2017, NaN  
07-Nov-2017 01:00:00, NaN  
07-Nov-2017 02:00:00, NaN  
07-Nov-2017 03:00:00, NaN

07-Nov-2017 04:00:00, NaN  
07-Nov-2017 05:00:00, NaN  
07-Nov-2017 06:00:00, NaN  
07-Nov-2017 07:00:00, NaN  
07-Nov-2017 08:00:00, NaN  
07-Nov-2017 09:00:00, NaN  
07-Nov-2017 10:00:00, NaN  
07-Nov-2017 11:00:00, NaN  
07-Nov-2017 12:00:00, NaN  
07-Nov-2017 13:00:00, NaN  
07-Nov-2017 14:00:00, NaN  
07-Nov-2017 15:00:00, NaN  
07-Nov-2017 16:00:00, NaN  
07-Nov-2017 17:00:00, NaN  
07-Nov-2017 18:00:00, NaN  
07-Nov-2017 19:00:00, NaN  
07-Nov-2017 20:00:00, NaN  
07-Nov-2017 21:00:00, NaN  
07-Nov-2017 22:00:00, NaN  
07-Nov-2017 23:00:00, NaN  
08-Nov-2017, NaN  
08-Nov-2017 01:00:00, NaN  
08-Nov-2017 02:00:00, NaN  
08-Nov-2017 03:00:00, NaN  
08-Nov-2017 04:00:00, NaN  
08-Nov-2017 05:00:00, NaN  
08-Nov-2017 06:00:00, NaN  
08-Nov-2017 07:00:00, NaN  
08-Nov-2017 08:00:00, NaN  
08-Nov-2017 09:00:00, NaN  
08-Nov-2017 10:00:00, NaN  
08-Nov-2017 11:00:00, NaN  
08-Nov-2017 12:00:00, NaN  
08-Nov-2017 13:00:00, NaN  
08-Nov-2017 14:00:00, NaN  
08-Nov-2017 15:00:00, NaN  
08-Nov-2017 16:00:00, NaN  
08-Nov-2017 17:00:00, NaN  
08-Nov-2017 18:00:00, NaN  
08-Nov-2017 19:00:00, NaN  
08-Nov-2017 20:00:00, NaN  
08-Nov-2017 21:00:00, NaN  
08-Nov-2017 22:00:00, NaN  
08-Nov-2017 23:00:00, NaN  
09-Nov-2017, NaN  
09-Nov-2017 01:00:00, NaN  
09-Nov-2017 02:00:00, NaN  
09-Nov-2017 03:00:00, NaN  
09-Nov-2017 04:00:00, NaN  
09-Nov-2017 05:00:00, NaN  
09-Nov-2017 06:00:00, NaN  
09-Nov-2017 07:00:00, NaN  
09-Nov-2017 08:00:00, NaN  
09-Nov-2017 09:00:00, NaN  
09-Nov-2017 10:00:00, NaN  
09-Nov-2017 11:00:00, NaN  
09-Nov-2017 12:00:00, NaN  
09-Nov-2017 13:00:00, NaN  
09-Nov-2017 14:00:00, NaN  
09-Nov-2017 15:00:00, NaN  
09-Nov-2017 16:00:00, NaN  
09-Nov-2017 17:00:00, NaN  
09-Nov-2017 18:00:00, NaN  
09-Nov-2017 19:00:00, NaN



|              |           |     |
|--------------|-----------|-----|
| 09-Nov-2017  | 20:00:00, | NaN |
| 09-Nov-2017  | 21:00:00, | NaN |
| 09-Nov-2017  | 22:00:00, | NaN |
| 09-Nov-2017  | 23:00:00, | NaN |
| 10-Nov-2017, |           | NaN |
| 10-Nov-2017  | 01:00:00, | NaN |
| 10-Nov-2017  | 02:00:00, | NaN |
| 10-Nov-2017  | 03:00:00, | NaN |
| 10-Nov-2017  | 04:00:00, | NaN |
| 10-Nov-2017  | 05:00:00, | NaN |
| 10-Nov-2017  | 06:00:00, | NaN |
| 10-Nov-2017  | 07:00:00, | NaN |
| 10-Nov-2017  | 08:00:00, | NaN |
| 10-Nov-2017  | 09:00:00, | NaN |
| 10-Nov-2017  | 10:00:00, | NaN |
| 10-Nov-2017  | 11:00:00, | NaN |
| 10-Nov-2017  | 12:00:00, | NaN |
| 10-Nov-2017  | 13:00:00, | NaN |
| 10-Nov-2017  | 14:00:00, | NaN |
| 10-Nov-2017  | 15:00:00, | NaN |
| 10-Nov-2017  | 16:00:00, | NaN |
| 10-Nov-2017  | 17:00:00, | NaN |
| 10-Nov-2017  | 18:00:00, | NaN |
| 10-Nov-2017  | 19:00:00, | NaN |
| 10-Nov-2017  | 20:00:00, | NaN |
| 10-Nov-2017  | 21:00:00, | NaN |
| 10-Nov-2017  | 22:00:00, | NaN |
| 10-Nov-2017  | 23:00:00, | NaN |
| 11-Nov-2017, |           | NaN |
| 11-Nov-2017  | 01:00:00, | NaN |
| 11-Nov-2017  | 02:00:00, | NaN |
| 11-Nov-2017  | 03:00:00, | NaN |
| 11-Nov-2017  | 04:00:00, | NaN |
| 11-Nov-2017  | 05:00:00, | NaN |
| 11-Nov-2017  | 06:00:00, | NaN |
| 11-Nov-2017  | 07:00:00, | NaN |
| 11-Nov-2017  | 08:00:00, | NaN |
| 11-Nov-2017  | 09:00:00, | NaN |
| 11-Nov-2017  | 10:00:00, | NaN |
| 11-Nov-2017  | 11:00:00, | NaN |
| 11-Nov-2017  | 12:00:00, | NaN |
| 11-Nov-2017  | 13:00:00, | NaN |
| 11-Nov-2017  | 14:00:00, | NaN |
| 11-Nov-2017  | 15:00:00, | NaN |
| 11-Nov-2017  | 16:00:00, | NaN |
| 11-Nov-2017  | 17:00:00, | NaN |
| 11-Nov-2017  | 18:00:00, | NaN |
| 11-Nov-2017  | 19:00:00, | NaN |
| 11-Nov-2017  | 20:00:00, | NaN |
| 11-Nov-2017  | 21:00:00, | NaN |
| 11-Nov-2017  | 22:00:00, | NaN |
| 11-Nov-2017  | 23:00:00, | NaN |
| 12-Nov-2017, |           | NaN |
| 12-Nov-2017  | 01:00:00, | NaN |
| 12-Nov-2017  | 02:00:00, | NaN |
| 12-Nov-2017  | 03:00:00, | NaN |
| 12-Nov-2017  | 04:00:00, | NaN |
| 12-Nov-2017  | 05:00:00, | NaN |
| 12-Nov-2017  | 06:00:00, | NaN |
| 12-Nov-2017  | 07:00:00, | NaN |
| 12-Nov-2017  | 08:00:00, | NaN |
| 12-Nov-2017  | 09:00:00, | NaN |
| 12-Nov-2017  | 10:00:00, | NaN |
| 12-Nov-2017  | 11:00:00, | NaN |

12-Nov-2017 12:00:00, NaN  
12-Nov-2017 13:00:00, NaN  
12-Nov-2017 14:00:00, NaN  
12-Nov-2017 15:00:00, NaN  
12-Nov-2017 16:00:00, NaN  
12-Nov-2017 17:00:00, NaN  
12-Nov-2017 18:00:00, NaN  
12-Nov-2017 19:00:00, NaN  
12-Nov-2017 20:00:00, NaN  
12-Nov-2017 21:00:00, NaN  
12-Nov-2017 22:00:00, NaN  
12-Nov-2017 23:00:00, NaN  
13-Nov-2017, NaN  
13-Nov-2017 01:00:00, NaN  
13-Nov-2017 02:00:00, NaN  
13-Nov-2017 03:00:00, NaN  
13-Nov-2017 04:00:00, NaN  
13-Nov-2017 05:00:00, NaN  
13-Nov-2017 06:00:00, NaN  
13-Nov-2017 07:00:00, NaN  
13-Nov-2017 08:00:00, NaN  
13-Nov-2017 09:00:00, NaN  
13-Nov-2017 10:00:00, NaN  
13-Nov-2017 11:00:00, NaN  
13-Nov-2017 12:00:00, NaN  
13-Nov-2017 13:00:00, NaN  
13-Nov-2017 14:00:00, NaN  
13-Nov-2017 15:00:00, NaN  
13-Nov-2017 16:00:00, NaN  
13-Nov-2017 17:00:00, NaN  
13-Nov-2017 18:00:00, NaN  
13-Nov-2017 19:00:00, NaN  
13-Nov-2017 20:00:00, NaN  
13-Nov-2017 21:00:00, NaN  
13-Nov-2017 22:00:00, NaN  
13-Nov-2017 23:00:00, NaN  
14-Nov-2017, NaN  
14-Nov-2017 01:00:00, NaN  
14-Nov-2017 02:00:00, NaN  
14-Nov-2017 03:00:00, NaN  
14-Nov-2017 04:00:00, NaN  
14-Nov-2017 05:00:00, NaN  
14-Nov-2017 06:00:00, NaN  
14-Nov-2017 07:00:00, NaN  
14-Nov-2017 08:00:00, NaN  
14-Nov-2017 09:00:00, NaN  
14-Nov-2017 10:00:00, NaN  
14-Nov-2017 11:00:00, NaN  
14-Nov-2017 12:00:00, NaN  
14-Nov-2017 13:00:00, NaN  
14-Nov-2017 14:00:00, NaN  
14-Nov-2017 15:00:00, NaN  
14-Nov-2017 16:00:00, NaN  
14-Nov-2017 17:00:00, NaN  
14-Nov-2017 18:00:00, NaN  
14-Nov-2017 19:00:00, NaN  
14-Nov-2017 20:00:00, NaN  
14-Nov-2017 21:00:00, NaN  
14-Nov-2017 22:00:00, NaN  
14-Nov-2017 23:00:00, NaN  
15-Nov-2017, NaN  
15-Nov-2017 01:00:00, NaN  
15-Nov-2017 02:00:00, NaN  
15-Nov-2017 03:00:00, NaN

|              |           |     |
|--------------|-----------|-----|
| 15-Nov-2017  | 04:00:00, | NaN |
| 15-Nov-2017  | 05:00:00, | NaN |
| 15-Nov-2017  | 06:00:00, | NaN |
| 15-Nov-2017  | 07:00:00, | NaN |
| 15-Nov-2017  | 08:00:00, | NaN |
| 15-Nov-2017  | 09:00:00, | NaN |
| 15-Nov-2017  | 10:00:00, | NaN |
| 15-Nov-2017  | 11:00:00, | NaN |
| 15-Nov-2017  | 12:00:00, | NaN |
| 15-Nov-2017  | 13:00:00, | NaN |
| 15-Nov-2017  | 14:00:00, | NaN |
| 15-Nov-2017  | 15:00:00, | NaN |
| 15-Nov-2017  | 16:00:00, | NaN |
| 15-Nov-2017  | 17:00:00, | NaN |
| 15-Nov-2017  | 18:00:00, | NaN |
| 15-Nov-2017  | 19:00:00, | NaN |
| 15-Nov-2017  | 20:00:00, | NaN |
| 15-Nov-2017  | 21:00:00, | NaN |
| 15-Nov-2017  | 22:00:00, | NaN |
| 15-Nov-2017  | 23:00:00, | NaN |
| 16-Nov-2017, | NaN       |     |
| 16-Nov-2017  | 01:00:00, | NaN |
| 16-Nov-2017  | 02:00:00, | NaN |
| 16-Nov-2017  | 03:00:00, | NaN |
| 16-Nov-2017  | 04:00:00, | NaN |
| 16-Nov-2017  | 05:00:00, | NaN |
| 16-Nov-2017  | 06:00:00, | NaN |
| 16-Nov-2017  | 07:00:00, | NaN |
| 16-Nov-2017  | 08:00:00, | NaN |
| 16-Nov-2017  | 09:00:00, | NaN |
| 16-Nov-2017  | 10:00:00, | NaN |
| 16-Nov-2017  | 11:00:00, | NaN |
| 16-Nov-2017  | 12:00:00, | NaN |
| 16-Nov-2017  | 13:00:00, | NaN |
| 16-Nov-2017  | 14:00:00, | NaN |
| 16-Nov-2017  | 15:00:00, | NaN |
| 16-Nov-2017  | 16:00:00, | NaN |
| 16-Nov-2017  | 17:00:00, | NaN |
| 16-Nov-2017  | 18:00:00, | NaN |
| 16-Nov-2017  | 19:00:00, | NaN |
| 16-Nov-2017  | 20:00:00, | NaN |
| 16-Nov-2017  | 21:00:00, | NaN |
| 16-Nov-2017  | 22:00:00, | NaN |
| 16-Nov-2017  | 23:00:00, | NaN |
| 17-Nov-2017, | NaN       |     |
| 17-Nov-2017  | 01:00:00, | NaN |
| 17-Nov-2017  | 02:00:00, | NaN |
| 17-Nov-2017  | 03:00:00, | NaN |
| 17-Nov-2017  | 04:00:00, | NaN |
| 17-Nov-2017  | 05:00:00, | NaN |
| 17-Nov-2017  | 06:00:00, | NaN |
| 17-Nov-2017  | 07:00:00, | NaN |
| 17-Nov-2017  | 08:00:00, | NaN |
| 17-Nov-2017  | 09:00:00, | NaN |
| 17-Nov-2017  | 10:00:00, | NaN |
| 17-Nov-2017  | 11:00:00, | NaN |
| 17-Nov-2017  | 12:00:00, | NaN |
| 17-Nov-2017  | 13:00:00, | NaN |
| 17-Nov-2017  | 14:00:00, | NaN |
| 17-Nov-2017  | 15:00:00, | NaN |
| 17-Nov-2017  | 16:00:00, | NaN |
| 17-Nov-2017  | 17:00:00, | NaN |
| 17-Nov-2017  | 18:00:00, | NaN |
| 17-Nov-2017  | 19:00:00, | NaN |

17-Nov-2017 20:00:00, NaN  
17-Nov-2017 21:00:00, NaN  
17-Nov-2017 22:00:00, NaN  
17-Nov-2017 23:00:00, NaN  
18-Nov-2017, NaN  
18-Nov-2017 01:00:00, NaN  
18-Nov-2017 02:00:00, NaN  
18-Nov-2017 03:00:00, NaN  
18-Nov-2017 04:00:00, NaN  
18-Nov-2017 05:00:00, NaN  
18-Nov-2017 06:00:00, NaN  
18-Nov-2017 07:00:00, NaN  
18-Nov-2017 08:00:00, NaN  
18-Nov-2017 09:00:00, NaN  
18-Nov-2017 10:00:00, NaN  
18-Nov-2017 11:00:00, NaN  
18-Nov-2017 12:00:00, NaN  
18-Nov-2017 13:00:00, NaN  
18-Nov-2017 14:00:00, NaN  
18-Nov-2017 15:00:00, NaN  
18-Nov-2017 16:00:00, NaN  
18-Nov-2017 17:00:00, NaN  
18-Nov-2017 18:00:00, NaN  
18-Nov-2017 19:00:00, NaN  
18-Nov-2017 20:00:00, NaN  
18-Nov-2017 21:00:00, NaN  
18-Nov-2017 22:00:00, NaN  
18-Nov-2017 23:00:00, NaN  
19-Nov-2017, NaN  
19-Nov-2017 01:00:00, NaN  
19-Nov-2017 02:00:00, NaN  
19-Nov-2017 03:00:00, NaN  
19-Nov-2017 04:00:00, NaN  
19-Nov-2017 05:00:00, NaN  
19-Nov-2017 06:00:00, NaN  
19-Nov-2017 07:00:00, NaN  
19-Nov-2017 08:00:00, NaN  
19-Nov-2017 09:00:00, NaN  
19-Nov-2017 10:00:00, NaN  
19-Nov-2017 11:00:00, NaN  
19-Nov-2017 12:00:00, NaN  
19-Nov-2017 13:00:00, NaN  
19-Nov-2017 14:00:00, NaN  
19-Nov-2017 15:00:00, NaN  
19-Nov-2017 16:00:00, NaN  
19-Nov-2017 17:00:00, NaN  
19-Nov-2017 18:00:00, NaN  
19-Nov-2017 19:00:00, NaN  
19-Nov-2017 20:00:00, NaN  
19-Nov-2017 21:00:00, NaN  
19-Nov-2017 22:00:00, NaN  
19-Nov-2017 23:00:00, NaN  
20-Nov-2017, NaN  
20-Nov-2017 01:00:00, NaN  
20-Nov-2017 02:00:00, NaN  
20-Nov-2017 03:00:00, NaN  
20-Nov-2017 04:00:00, NaN  
20-Nov-2017 05:00:00, NaN  
20-Nov-2017 06:00:00, NaN  
20-Nov-2017 07:00:00, NaN  
20-Nov-2017 08:00:00, NaN  
20-Nov-2017 09:00:00, NaN  
20-Nov-2017 10:00:00, NaN  
20-Nov-2017 11:00:00, NaN

20-Nov-2017 12:00:00, NaN  
20-Nov-2017 13:00:00, NaN  
20-Nov-2017 14:00:00, NaN  
20-Nov-2017 15:00:00, NaN  
20-Nov-2017 16:00:00, NaN  
20-Nov-2017 17:00:00, NaN  
20-Nov-2017 18:00:00, NaN  
20-Nov-2017 19:00:00, NaN  
20-Nov-2017 20:00:00, NaN  
20-Nov-2017 21:00:00, NaN  
20-Nov-2017 22:00:00, NaN  
20-Nov-2017 23:00:00, NaN  
21-Nov-2017, NaN  
21-Nov-2017 01:00:00, NaN  
21-Nov-2017 02:00:00, NaN  
21-Nov-2017 03:00:00, NaN  
21-Nov-2017 04:00:00, NaN  
21-Nov-2017 05:00:00, NaN  
21-Nov-2017 06:00:00, NaN  
21-Nov-2017 07:00:00, NaN  
21-Nov-2017 08:00:00, NaN  
21-Nov-2017 09:00:00, NaN  
21-Nov-2017 10:00:00, NaN  
21-Nov-2017 11:00:00, NaN  
21-Nov-2017 12:00:00, NaN  
21-Nov-2017 13:00:00, NaN  
21-Nov-2017 14:00:00, NaN  
21-Nov-2017 15:00:00, NaN  
21-Nov-2017 16:00:00, NaN  
21-Nov-2017 17:00:00, NaN  
21-Nov-2017 18:00:00, NaN  
21-Nov-2017 19:00:00, NaN  
21-Nov-2017 20:00:00, NaN  
21-Nov-2017 21:00:00, NaN  
21-Nov-2017 22:00:00, NaN  
21-Nov-2017 23:00:00, NaN  
22-Nov-2017, NaN  
22-Nov-2017 01:00:00, NaN  
22-Nov-2017 02:00:00, NaN  
22-Nov-2017 03:00:00, NaN  
22-Nov-2017 04:00:00, NaN  
22-Nov-2017 05:00:00, NaN  
22-Nov-2017 06:00:00, NaN  
22-Nov-2017 07:00:00, NaN  
22-Nov-2017 08:00:00, NaN  
22-Nov-2017 09:00:00, NaN  
22-Nov-2017 10:00:00, NaN  
22-Nov-2017 11:00:00, NaN  
22-Nov-2017 12:00:00, NaN  
22-Nov-2017 13:00:00, NaN  
22-Nov-2017 14:00:00, NaN  
22-Nov-2017 15:00:00, NaN  
22-Nov-2017 16:00:00, NaN  
22-Nov-2017 17:00:00, NaN  
22-Nov-2017 18:00:00, NaN  
22-Nov-2017 19:00:00, NaN  
22-Nov-2017 20:00:00, NaN  
22-Nov-2017 21:00:00, NaN  
22-Nov-2017 22:00:00, NaN  
22-Nov-2017 23:00:00, NaN  
23-Nov-2017, NaN  
23-Nov-2017 01:00:00, NaN  
23-Nov-2017 02:00:00, NaN  
23-Nov-2017 03:00:00, NaN

|              |           |     |
|--------------|-----------|-----|
| 23-Nov-2017  | 04:00:00, | NaN |
| 23-Nov-2017  | 05:00:00, | NaN |
| 23-Nov-2017  | 06:00:00, | NaN |
| 23-Nov-2017  | 07:00:00, | NaN |
| 23-Nov-2017  | 08:00:00, | NaN |
| 23-Nov-2017  | 09:00:00, | NaN |
| 23-Nov-2017  | 10:00:00, | NaN |
| 23-Nov-2017  | 11:00:00, | NaN |
| 23-Nov-2017  | 12:00:00, | NaN |
| 23-Nov-2017  | 13:00:00, | NaN |
| 23-Nov-2017  | 14:00:00, | NaN |
| 23-Nov-2017  | 15:00:00, | NaN |
| 23-Nov-2017  | 16:00:00, | NaN |
| 23-Nov-2017  | 17:00:00, | NaN |
| 23-Nov-2017  | 18:00:00, | NaN |
| 23-Nov-2017  | 19:00:00, | NaN |
| 23-Nov-2017  | 20:00:00, | NaN |
| 23-Nov-2017  | 21:00:00, | NaN |
| 23-Nov-2017  | 22:00:00, | NaN |
| 23-Nov-2017  | 23:00:00, | NaN |
| 24-Nov-2017, | NaN       |     |
| 24-Nov-2017  | 01:00:00, | NaN |
| 24-Nov-2017  | 02:00:00, | NaN |
| 24-Nov-2017  | 03:00:00, | NaN |
| 24-Nov-2017  | 04:00:00, | NaN |
| 24-Nov-2017  | 05:00:00, | NaN |
| 24-Nov-2017  | 06:00:00, | NaN |
| 24-Nov-2017  | 07:00:00, | NaN |
| 24-Nov-2017  | 08:00:00, | NaN |
| 24-Nov-2017  | 09:00:00, | NaN |
| 24-Nov-2017  | 10:00:00, | NaN |
| 24-Nov-2017  | 11:00:00, | NaN |
| 24-Nov-2017  | 12:00:00, | NaN |
| 24-Nov-2017  | 13:00:00, | NaN |
| 24-Nov-2017  | 14:00:00, | NaN |
| 24-Nov-2017  | 15:00:00, | NaN |
| 24-Nov-2017  | 16:00:00, | NaN |
| 24-Nov-2017  | 17:00:00, | NaN |
| 24-Nov-2017  | 18:00:00, | NaN |
| 24-Nov-2017  | 19:00:00, | NaN |
| 24-Nov-2017  | 20:00:00, | NaN |
| 24-Nov-2017  | 21:00:00, | NaN |
| 24-Nov-2017  | 22:00:00, | NaN |
| 24-Nov-2017  | 23:00:00, | NaN |
| 25-Nov-2017, | NaN       |     |
| 25-Nov-2017  | 01:00:00, | NaN |
| 25-Nov-2017  | 02:00:00, | NaN |
| 25-Nov-2017  | 03:00:00, | NaN |
| 25-Nov-2017  | 04:00:00, | NaN |
| 25-Nov-2017  | 05:00:00, | NaN |
| 25-Nov-2017  | 06:00:00, | NaN |
| 25-Nov-2017  | 07:00:00, | NaN |
| 25-Nov-2017  | 08:00:00, | NaN |
| 25-Nov-2017  | 09:00:00, | NaN |
| 25-Nov-2017  | 10:00:00, | NaN |
| 25-Nov-2017  | 11:00:00, | NaN |
| 25-Nov-2017  | 12:00:00, | NaN |
| 25-Nov-2017  | 13:00:00, | NaN |
| 25-Nov-2017  | 14:00:00, | NaN |
| 25-Nov-2017  | 15:00:00, | NaN |
| 25-Nov-2017  | 16:00:00, | NaN |
| 25-Nov-2017  | 17:00:00, | NaN |
| 25-Nov-2017  | 18:00:00, | NaN |
| 25-Nov-2017  | 19:00:00, | NaN |

|              |           |     |
|--------------|-----------|-----|
| 25-Nov-2017  | 20:00:00, | NaN |
| 25-Nov-2017  | 21:00:00, | NaN |
| 25-Nov-2017  | 22:00:00, | NaN |
| 25-Nov-2017  | 23:00:00, | NaN |
| 26-Nov-2017, | NaN       |     |
| 26-Nov-2017  | 01:00:00, | NaN |
| 26-Nov-2017  | 02:00:00, | NaN |
| 26-Nov-2017  | 03:00:00, | NaN |
| 26-Nov-2017  | 04:00:00, | NaN |
| 26-Nov-2017  | 05:00:00, | NaN |
| 26-Nov-2017  | 06:00:00, | NaN |
| 26-Nov-2017  | 07:00:00, | NaN |
| 26-Nov-2017  | 08:00:00, | NaN |
| 26-Nov-2017  | 09:00:00, | NaN |
| 26-Nov-2017  | 10:00:00, | NaN |
| 26-Nov-2017  | 11:00:00, | NaN |
| 26-Nov-2017  | 12:00:00, | NaN |
| 26-Nov-2017  | 13:00:00, | NaN |
| 26-Nov-2017  | 14:00:00, | NaN |
| 26-Nov-2017  | 15:00:00, | NaN |
| 26-Nov-2017  | 16:00:00, | NaN |
| 26-Nov-2017  | 17:00:00, | NaN |
| 26-Nov-2017  | 18:00:00, | NaN |
| 26-Nov-2017  | 19:00:00, | NaN |
| 26-Nov-2017  | 20:00:00, | NaN |
| 26-Nov-2017  | 21:00:00, | NaN |
| 26-Nov-2017  | 22:00:00, | NaN |
| 26-Nov-2017  | 23:00:00, | NaN |
| 27-Nov-2017, | NaN       |     |
| 27-Nov-2017  | 01:00:00, | NaN |
| 27-Nov-2017  | 02:00:00, | NaN |
| 27-Nov-2017  | 03:00:00, | NaN |
| 27-Nov-2017  | 04:00:00, | NaN |
| 27-Nov-2017  | 05:00:00, | NaN |
| 27-Nov-2017  | 06:00:00, | NaN |
| 27-Nov-2017  | 07:00:00, | NaN |
| 27-Nov-2017  | 08:00:00, | NaN |
| 27-Nov-2017  | 09:00:00, | NaN |
| 27-Nov-2017  | 10:00:00, | NaN |
| 27-Nov-2017  | 11:00:00, | NaN |
| 27-Nov-2017  | 12:00:00, | NaN |
| 27-Nov-2017  | 13:00:00, | NaN |
| 27-Nov-2017  | 14:00:00, | NaN |
| 27-Nov-2017  | 15:00:00, | NaN |
| 27-Nov-2017  | 16:00:00, | NaN |
| 27-Nov-2017  | 17:00:00, | NaN |
| 27-Nov-2017  | 18:00:00, | NaN |
| 27-Nov-2017  | 19:00:00, | NaN |
| 27-Nov-2017  | 20:00:00, | NaN |
| 27-Nov-2017  | 21:00:00, | NaN |
| 27-Nov-2017  | 22:00:00, | NaN |
| 27-Nov-2017  | 23:00:00, | NaN |
| 28-Nov-2017, | NaN       |     |
| 28-Nov-2017  | 01:00:00, | NaN |
| 28-Nov-2017  | 02:00:00, | NaN |
| 28-Nov-2017  | 03:00:00, | NaN |
| 28-Nov-2017  | 04:00:00, | NaN |
| 28-Nov-2017  | 05:00:00, | NaN |
| 28-Nov-2017  | 06:00:00, | NaN |
| 28-Nov-2017  | 07:00:00, | NaN |
| 28-Nov-2017  | 08:00:00, | NaN |
| 28-Nov-2017  | 09:00:00, | NaN |
| 28-Nov-2017  | 10:00:00, | NaN |
| 28-Nov-2017  | 11:00:00, | NaN |

28-Nov-2017 12:00:00, NaN  
28-Nov-2017 13:00:00, NaN  
28-Nov-2017 14:00:00, NaN  
28-Nov-2017 15:00:00, NaN  
28-Nov-2017 16:00:00, NaN  
28-Nov-2017 17:00:00, NaN  
28-Nov-2017 18:00:00, NaN  
28-Nov-2017 19:00:00, NaN  
28-Nov-2017 20:00:00, NaN  
28-Nov-2017 21:00:00, NaN  
28-Nov-2017 22:00:00, NaN  
28-Nov-2017 23:00:00, NaN  
29-Nov-2017, NaN  
29-Nov-2017 01:00:00, NaN  
29-Nov-2017 02:00:00, NaN  
29-Nov-2017 03:00:00, NaN  
29-Nov-2017 04:00:00, NaN  
29-Nov-2017 05:00:00, NaN  
29-Nov-2017 06:00:00, NaN  
29-Nov-2017 07:00:00, NaN  
29-Nov-2017 08:00:00, NaN  
29-Nov-2017 09:00:00, NaN  
29-Nov-2017 10:00:00, NaN  
29-Nov-2017 11:00:00, NaN  
29-Nov-2017 12:00:00, NaN  
29-Nov-2017 13:00:00, NaN  
29-Nov-2017 14:00:00, NaN  
29-Nov-2017 15:00:00, NaN  
29-Nov-2017 16:00:00, NaN  
29-Nov-2017 17:00:00, NaN  
29-Nov-2017 18:00:00, NaN  
29-Nov-2017 19:00:00, NaN  
29-Nov-2017 20:00:00, NaN  
29-Nov-2017 21:00:00, NaN  
29-Nov-2017 22:00:00, NaN  
29-Nov-2017 23:00:00, NaN  
30-Nov-2017, NaN  
30-Nov-2017 01:00:00, NaN  
30-Nov-2017 02:00:00, NaN  
30-Nov-2017 03:00:00, NaN  
30-Nov-2017 04:00:00, NaN  
30-Nov-2017 05:00:00, NaN  
30-Nov-2017 06:00:00, NaN  
30-Nov-2017 07:00:00, NaN  
30-Nov-2017 08:00:00, NaN  
30-Nov-2017 09:00:00, NaN  
30-Nov-2017 10:00:00, NaN  
30-Nov-2017 11:00:00, NaN  
30-Nov-2017 12:00:00, NaN  
30-Nov-2017 13:00:00, NaN  
30-Nov-2017 14:00:00, NaN  
30-Nov-2017 15:00:00, NaN  
30-Nov-2017 16:00:00, NaN  
30-Nov-2017 17:00:00, NaN  
30-Nov-2017 18:00:00, NaN  
30-Nov-2017 19:00:00, NaN  
30-Nov-2017 20:00:00, NaN  
30-Nov-2017 21:00:00, NaN  
30-Nov-2017 22:00:00, NaN  
30-Nov-2017 23:00:00, NaN  
01-Dec-2017, NaN  
01-Dec-2017 01:00:00, NaN  
01-Dec-2017 02:00:00, NaN  
01-Dec-2017 03:00:00, NaN



01-Dec-2017 04:00:00, NaN  
01-Dec-2017 05:00:00, NaN  
01-Dec-2017 06:00:00, NaN  
01-Dec-2017 07:00:00, NaN  
01-Dec-2017 08:00:00, NaN  
01-Dec-2017 09:00:00, NaN  
01-Dec-2017 10:00:00, NaN  
01-Dec-2017 11:00:00, NaN  
01-Dec-2017 12:00:00, NaN  
01-Dec-2017 13:00:00, NaN  
01-Dec-2017 14:00:00, NaN  
01-Dec-2017 15:00:00, NaN  
01-Dec-2017 16:00:00, NaN  
01-Dec-2017 17:00:00, NaN  
01-Dec-2017 18:00:00, NaN  
01-Dec-2017 19:00:00, NaN  
01-Dec-2017 20:00:00, NaN  
01-Dec-2017 21:00:00, NaN  
01-Dec-2017 22:00:00, NaN  
01-Dec-2017 23:00:00, NaN  
02-Dec-2017, NaN  
02-Dec-2017 01:00:00, NaN  
02-Dec-2017 02:00:00, NaN  
02-Dec-2017 03:00:00, NaN  
02-Dec-2017 04:00:00, NaN  
02-Dec-2017 05:00:00, NaN  
02-Dec-2017 06:00:00, NaN  
02-Dec-2017 07:00:00, NaN  
02-Dec-2017 08:00:00, NaN  
02-Dec-2017 09:00:00, NaN  
02-Dec-2017 10:00:00, NaN  
02-Dec-2017 11:00:00, NaN  
02-Dec-2017 12:00:00, NaN  
02-Dec-2017 13:00:00, NaN  
02-Dec-2017 14:00:00, NaN  
02-Dec-2017 15:00:00, NaN  
02-Dec-2017 16:00:00, NaN  
02-Dec-2017 17:00:00, NaN  
02-Dec-2017 18:00:00, NaN  
02-Dec-2017 19:00:00, NaN  
02-Dec-2017 20:00:00, NaN  
02-Dec-2017 21:00:00, NaN  
02-Dec-2017 22:00:00, NaN  
02-Dec-2017 23:00:00, NaN  
03-Dec-2017, NaN  
03-Dec-2017 01:00:00, NaN  
03-Dec-2017 02:00:00, NaN  
03-Dec-2017 03:00:00, NaN  
03-Dec-2017 04:00:00, NaN  
03-Dec-2017 05:00:00, NaN  
03-Dec-2017 06:00:00, NaN  
03-Dec-2017 07:00:00, NaN  
03-Dec-2017 08:00:00, NaN  
03-Dec-2017 09:00:00, NaN  
03-Dec-2017 10:00:00, NaN  
03-Dec-2017 11:00:00, NaN  
03-Dec-2017 12:00:00, NaN  
03-Dec-2017 13:00:00, NaN  
03-Dec-2017 14:00:00, NaN  
03-Dec-2017 15:00:00, NaN  
03-Dec-2017 16:00:00, NaN  
03-Dec-2017 17:00:00, NaN  
03-Dec-2017 18:00:00, NaN  
03-Dec-2017 19:00:00, NaN

03-Dec-2017 20:00:00, NaN  
03-Dec-2017 21:00:00, NaN  
03-Dec-2017 22:00:00, NaN  
03-Dec-2017 23:00:00, NaN  
04-Dec-2017, NaN  
04-Dec-2017 01:00:00, NaN  
04-Dec-2017 02:00:00, NaN  
04-Dec-2017 03:00:00, NaN  
04-Dec-2017 04:00:00, NaN  
04-Dec-2017 05:00:00, NaN  
04-Dec-2017 06:00:00, NaN  
04-Dec-2017 07:00:00, NaN  
04-Dec-2017 08:00:00, NaN  
04-Dec-2017 09:00:00, NaN  
04-Dec-2017 10:00:00, NaN  
04-Dec-2017 11:00:00, NaN  
04-Dec-2017 12:00:00, NaN  
04-Dec-2017 13:00:00, NaN  
04-Dec-2017 14:00:00, NaN  
04-Dec-2017 15:00:00, NaN  
04-Dec-2017 16:00:00, NaN  
04-Dec-2017 17:00:00, NaN  
04-Dec-2017 18:00:00, NaN  
04-Dec-2017 19:00:00, NaN  
04-Dec-2017 20:00:00, NaN  
04-Dec-2017 21:00:00, NaN  
04-Dec-2017 22:00:00, NaN  
04-Dec-2017 23:00:00, NaN  
05-Dec-2017, NaN  
05-Dec-2017 01:00:00, NaN  
05-Dec-2017 02:00:00, NaN  
05-Dec-2017 03:00:00, NaN  
05-Dec-2017 04:00:00, NaN  
05-Dec-2017 05:00:00, NaN  
05-Dec-2017 06:00:00, NaN  
05-Dec-2017 07:00:00, NaN  
05-Dec-2017 08:00:00, NaN  
05-Dec-2017 09:00:00, NaN  
05-Dec-2017 10:00:00, NaN  
05-Dec-2017 11:00:00, NaN  
05-Dec-2017 12:00:00, NaN  
05-Dec-2017 13:00:00, NaN  
05-Dec-2017 14:00:00, NaN  
05-Dec-2017 15:00:00, NaN  
05-Dec-2017 16:00:00, NaN  
05-Dec-2017 17:00:00, NaN  
05-Dec-2017 18:00:00, NaN  
05-Dec-2017 19:00:00, NaN  
05-Dec-2017 20:00:00, NaN  
05-Dec-2017 21:00:00, NaN  
05-Dec-2017 22:00:00, NaN  
05-Dec-2017 23:00:00, NaN  
06-Dec-2017, NaN  
06-Dec-2017 01:00:00, NaN  
06-Dec-2017 02:00:00, NaN  
06-Dec-2017 03:00:00, NaN  
06-Dec-2017 04:00:00, NaN  
06-Dec-2017 05:00:00, NaN  
06-Dec-2017 06:00:00, NaN  
06-Dec-2017 07:00:00, NaN  
06-Dec-2017 08:00:00, NaN  
06-Dec-2017 09:00:00, NaN  
06-Dec-2017 10:00:00, NaN  
06-Dec-2017 11:00:00, NaN

06-Dec-2017 12:00:00, NaN  
06-Dec-2017 13:00:00, NaN  
06-Dec-2017 14:00:00, NaN  
06-Dec-2017 15:00:00, NaN  
06-Dec-2017 16:00:00, NaN  
06-Dec-2017 17:00:00, NaN  
06-Dec-2017 18:00:00, NaN  
06-Dec-2017 19:00:00, NaN  
06-Dec-2017 20:00:00, NaN  
06-Dec-2017 21:00:00, NaN  
06-Dec-2017 22:00:00, NaN  
06-Dec-2017 23:00:00, NaN  
07-Dec-2017, NaN  
07-Dec-2017 01:00:00, NaN  
07-Dec-2017 02:00:00, NaN  
07-Dec-2017 03:00:00, NaN  
07-Dec-2017 04:00:00, NaN  
07-Dec-2017 05:00:00, NaN  
07-Dec-2017 06:00:00, NaN  
07-Dec-2017 07:00:00, NaN  
07-Dec-2017 08:00:00, NaN  
07-Dec-2017 09:00:00, NaN  
07-Dec-2017 10:00:00, NaN  
07-Dec-2017 11:00:00, NaN  
07-Dec-2017 12:00:00, NaN  
07-Dec-2017 13:00:00, NaN  
07-Dec-2017 14:00:00, NaN  
07-Dec-2017 15:00:00, NaN  
07-Dec-2017 16:00:00, NaN  
07-Dec-2017 17:00:00, NaN  
07-Dec-2017 18:00:00, NaN  
07-Dec-2017 19:00:00, NaN  
07-Dec-2017 20:00:00, NaN  
07-Dec-2017 21:00:00, NaN  
07-Dec-2017 22:00:00, NaN  
07-Dec-2017 23:00:00, NaN  
08-Dec-2017, NaN  
08-Dec-2017 01:00:00, NaN  
08-Dec-2017 02:00:00, NaN  
08-Dec-2017 03:00:00, NaN  
08-Dec-2017 04:00:00, NaN  
08-Dec-2017 05:00:00, NaN  
08-Dec-2017 06:00:00, NaN  
08-Dec-2017 07:00:00, NaN  
08-Dec-2017 08:00:00, NaN  
08-Dec-2017 09:00:00, NaN  
08-Dec-2017 10:00:00, NaN  
08-Dec-2017 11:00:00, NaN  
08-Dec-2017 12:00:00, NaN  
08-Dec-2017 13:00:00, NaN  
08-Dec-2017 14:00:00, NaN  
08-Dec-2017 15:00:00, NaN  
08-Dec-2017 16:00:00, NaN  
08-Dec-2017 17:00:00, NaN  
08-Dec-2017 18:00:00, NaN  
08-Dec-2017 19:00:00, NaN  
08-Dec-2017 20:00:00, NaN  
08-Dec-2017 21:00:00, NaN  
08-Dec-2017 22:00:00, NaN  
08-Dec-2017 23:00:00, NaN  
09-Dec-2017, NaN  
09-Dec-2017 01:00:00, NaN  
09-Dec-2017 02:00:00, NaN  
09-Dec-2017 03:00:00, NaN

|              |           |     |
|--------------|-----------|-----|
| 09-Dec-2017  | 04:00:00, | NaN |
| 09-Dec-2017  | 05:00:00, | NaN |
| 09-Dec-2017  | 06:00:00, | NaN |
| 09-Dec-2017  | 07:00:00, | NaN |
| 09-Dec-2017  | 08:00:00, | NaN |
| 09-Dec-2017  | 09:00:00, | NaN |
| 09-Dec-2017  | 10:00:00, | NaN |
| 09-Dec-2017  | 11:00:00, | NaN |
| 09-Dec-2017  | 12:00:00, | NaN |
| 09-Dec-2017  | 13:00:00, | NaN |
| 09-Dec-2017  | 14:00:00, | NaN |
| 09-Dec-2017  | 15:00:00, | NaN |
| 09-Dec-2017  | 16:00:00, | NaN |
| 09-Dec-2017  | 17:00:00, | NaN |
| 09-Dec-2017  | 18:00:00, | NaN |
| 09-Dec-2017  | 19:00:00, | NaN |
| 09-Dec-2017  | 20:00:00, | NaN |
| 09-Dec-2017  | 21:00:00, | NaN |
| 09-Dec-2017  | 22:00:00, | NaN |
| 09-Dec-2017  | 23:00:00, | NaN |
| 10-Dec-2017, | NaN       |     |
| 10-Dec-2017  | 01:00:00, | NaN |
| 10-Dec-2017  | 02:00:00, | NaN |
| 10-Dec-2017  | 03:00:00, | NaN |
| 10-Dec-2017  | 04:00:00, | NaN |
| 10-Dec-2017  | 05:00:00, | NaN |
| 10-Dec-2017  | 06:00:00, | NaN |
| 10-Dec-2017  | 07:00:00, | NaN |
| 10-Dec-2017  | 08:00:00, | NaN |
| 10-Dec-2017  | 09:00:00, | NaN |
| 10-Dec-2017  | 10:00:00, | NaN |
| 10-Dec-2017  | 11:00:00, | NaN |
| 10-Dec-2017  | 12:00:00, | NaN |
| 10-Dec-2017  | 13:00:00, | NaN |
| 10-Dec-2017  | 14:00:00, | NaN |
| 10-Dec-2017  | 15:00:00, | NaN |
| 10-Dec-2017  | 16:00:00, | NaN |
| 10-Dec-2017  | 17:00:00, | NaN |
| 10-Dec-2017  | 18:00:00, | NaN |
| 10-Dec-2017  | 19:00:00, | NaN |
| 10-Dec-2017  | 20:00:00, | NaN |
| 10-Dec-2017  | 21:00:00, | NaN |
| 10-Dec-2017  | 22:00:00, | NaN |
| 10-Dec-2017  | 23:00:00, | NaN |
| 11-Dec-2017, | NaN       |     |
| 11-Dec-2017  | 01:00:00, | NaN |
| 11-Dec-2017  | 02:00:00, | NaN |
| 11-Dec-2017  | 03:00:00, | NaN |
| 11-Dec-2017  | 04:00:00, | NaN |
| 11-Dec-2017  | 05:00:00, | NaN |
| 11-Dec-2017  | 06:00:00, | NaN |
| 11-Dec-2017  | 07:00:00, | NaN |
| 11-Dec-2017  | 08:00:00, | NaN |
| 11-Dec-2017  | 09:00:00, | NaN |
| 11-Dec-2017  | 10:00:00, | NaN |
| 11-Dec-2017  | 11:00:00, | NaN |
| 11-Dec-2017  | 12:00:00, | NaN |
| 11-Dec-2017  | 13:00:00, | NaN |
| 11-Dec-2017  | 14:00:00, | NaN |
| 11-Dec-2017  | 15:00:00, | NaN |
| 11-Dec-2017  | 16:00:00, | NaN |
| 11-Dec-2017  | 17:00:00, | NaN |
| 11-Dec-2017  | 18:00:00, | NaN |
| 11-Dec-2017  | 19:00:00, | NaN |

11-Dec-2017 20:00:00, NaN  
11-Dec-2017 21:00:00, NaN  
11-Dec-2017 22:00:00, NaN  
11-Dec-2017 23:00:00, NaN  
12-Dec-2017, NaN  
12-Dec-2017 01:00:00, NaN  
12-Dec-2017 02:00:00, NaN  
12-Dec-2017 03:00:00, NaN  
12-Dec-2017 04:00:00, NaN  
12-Dec-2017 05:00:00, NaN  
12-Dec-2017 06:00:00, NaN  
12-Dec-2017 07:00:00, NaN  
12-Dec-2017 08:00:00, NaN  
12-Dec-2017 09:00:00, NaN  
12-Dec-2017 10:00:00, NaN  
12-Dec-2017 11:00:00, NaN  
12-Dec-2017 12:00:00, NaN  
12-Dec-2017 13:00:00, NaN  
12-Dec-2017 14:00:00, NaN  
12-Dec-2017 15:00:00, NaN  
12-Dec-2017 16:00:00, NaN  
12-Dec-2017 17:00:00, NaN  
12-Dec-2017 18:00:00, NaN  
12-Dec-2017 19:00:00, NaN  
12-Dec-2017 20:00:00, NaN  
12-Dec-2017 21:00:00, NaN  
12-Dec-2017 22:00:00, NaN  
12-Dec-2017 23:00:00, NaN  
13-Dec-2017, NaN  
13-Dec-2017 01:00:00, NaN  
13-Dec-2017 02:00:00, NaN  
13-Dec-2017 03:00:00, NaN  
13-Dec-2017 04:00:00, NaN  
13-Dec-2017 05:00:00, NaN  
13-Dec-2017 06:00:00, NaN  
13-Dec-2017 07:00:00, NaN  
13-Dec-2017 08:00:00, NaN  
13-Dec-2017 09:00:00, NaN  
13-Dec-2017 10:00:00, NaN  
13-Dec-2017 11:00:00, NaN  
13-Dec-2017 12:00:00, NaN  
13-Dec-2017 13:00:00, NaN  
13-Dec-2017 14:00:00, NaN  
13-Dec-2017 15:00:00, NaN  
13-Dec-2017 16:00:00, NaN  
13-Dec-2017 17:00:00, NaN  
13-Dec-2017 18:00:00, NaN  
13-Dec-2017 19:00:00, NaN  
13-Dec-2017 20:00:00, NaN  
13-Dec-2017 21:00:00, NaN  
13-Dec-2017 22:00:00, NaN  
13-Dec-2017 23:00:00, NaN  
14-Dec-2017, NaN  
14-Dec-2017 01:00:00, NaN  
14-Dec-2017 02:00:00, NaN  
14-Dec-2017 03:00:00, NaN  
14-Dec-2017 04:00:00, NaN  
14-Dec-2017 05:00:00, NaN  
14-Dec-2017 06:00:00, NaN  
14-Dec-2017 07:00:00, NaN  
14-Dec-2017 08:00:00, NaN  
14-Dec-2017 09:00:00, NaN  
14-Dec-2017 10:00:00, NaN  
14-Dec-2017 11:00:00, NaN

14-Dec-2017 12:00:00, NaN  
14-Dec-2017 13:00:00, NaN  
14-Dec-2017 14:00:00, NaN  
14-Dec-2017 15:00:00, NaN  
14-Dec-2017 16:00:00, NaN  
14-Dec-2017 17:00:00, NaN  
14-Dec-2017 18:00:00, NaN  
14-Dec-2017 19:00:00, NaN  
14-Dec-2017 20:00:00, NaN  
14-Dec-2017 21:00:00, NaN  
14-Dec-2017 22:00:00, NaN  
14-Dec-2017 23:00:00, NaN  
15-Dec-2017, NaN  
15-Dec-2017 01:00:00, NaN  
15-Dec-2017 02:00:00, NaN  
15-Dec-2017 03:00:00, NaN  
15-Dec-2017 04:00:00, NaN  
15-Dec-2017 05:00:00, NaN  
15-Dec-2017 06:00:00, NaN  
15-Dec-2017 07:00:00, NaN  
15-Dec-2017 08:00:00, NaN  
15-Dec-2017 09:00:00, NaN  
15-Dec-2017 10:00:00, NaN  
15-Dec-2017 11:00:00, NaN  
15-Dec-2017 12:00:00, NaN  
15-Dec-2017 13:00:00, NaN  
15-Dec-2017 14:00:00, NaN  
15-Dec-2017 15:00:00, NaN  
15-Dec-2017 16:00:00, NaN  
15-Dec-2017 17:00:00, NaN  
15-Dec-2017 18:00:00, NaN  
15-Dec-2017 19:00:00, NaN  
15-Dec-2017 20:00:00, NaN  
15-Dec-2017 21:00:00, NaN  
15-Dec-2017 22:00:00, NaN  
15-Dec-2017 23:00:00, NaN  
16-Dec-2017, NaN  
16-Dec-2017 01:00:00, NaN  
16-Dec-2017 02:00:00, NaN  
16-Dec-2017 03:00:00, NaN  
16-Dec-2017 04:00:00, NaN  
16-Dec-2017 05:00:00, NaN  
16-Dec-2017 06:00:00, NaN  
16-Dec-2017 07:00:00, NaN  
16-Dec-2017 08:00:00, NaN  
16-Dec-2017 09:00:00, NaN  
16-Dec-2017 10:00:00, NaN  
16-Dec-2017 11:00:00, NaN  
16-Dec-2017 12:00:00, NaN  
16-Dec-2017 13:00:00, NaN  
16-Dec-2017 14:00:00, NaN  
16-Dec-2017 15:00:00, NaN  
16-Dec-2017 16:00:00, NaN  
16-Dec-2017 17:00:00, NaN  
16-Dec-2017 18:00:00, NaN  
16-Dec-2017 19:00:00, NaN  
16-Dec-2017 20:00:00, NaN  
16-Dec-2017 21:00:00, NaN  
16-Dec-2017 22:00:00, NaN  
16-Dec-2017 23:00:00, NaN  
17-Dec-2017, NaN  
17-Dec-2017 01:00:00, NaN  
17-Dec-2017 02:00:00, NaN  
17-Dec-2017 03:00:00, NaN

17-Dec-2017 04:00:00, NaN  
17-Dec-2017 05:00:00, NaN  
17-Dec-2017 06:00:00, NaN  
17-Dec-2017 07:00:00, NaN  
17-Dec-2017 08:00:00, NaN  
17-Dec-2017 09:00:00, NaN  
17-Dec-2017 10:00:00, NaN  
17-Dec-2017 11:00:00, NaN  
17-Dec-2017 12:00:00, NaN  
17-Dec-2017 13:00:00, NaN  
17-Dec-2017 14:00:00, NaN  
17-Dec-2017 15:00:00, NaN  
17-Dec-2017 16:00:00, NaN  
17-Dec-2017 17:00:00, NaN  
17-Dec-2017 18:00:00, NaN  
17-Dec-2017 19:00:00, NaN  
17-Dec-2017 20:00:00, NaN  
17-Dec-2017 21:00:00, NaN  
17-Dec-2017 22:00:00, NaN  
17-Dec-2017 23:00:00, NaN  
18-Dec-2017, NaN  
18-Dec-2017 01:00:00, NaN  
18-Dec-2017 02:00:00, NaN  
18-Dec-2017 03:00:00, NaN  
18-Dec-2017 04:00:00, NaN  
18-Dec-2017 05:00:00, NaN  
18-Dec-2017 06:00:00, NaN  
18-Dec-2017 07:00:00, NaN  
18-Dec-2017 08:00:00, NaN  
18-Dec-2017 09:00:00, NaN  
18-Dec-2017 10:00:00, NaN  
18-Dec-2017 11:00:00, NaN  
18-Dec-2017 12:00:00, NaN  
18-Dec-2017 13:00:00, NaN  
18-Dec-2017 14:00:00, NaN  
18-Dec-2017 15:00:00, NaN  
18-Dec-2017 16:00:00, NaN  
18-Dec-2017 17:00:00, NaN  
18-Dec-2017 18:00:00, NaN  
18-Dec-2017 19:00:00, NaN  
18-Dec-2017 20:00:00, NaN  
18-Dec-2017 21:00:00, NaN  
18-Dec-2017 22:00:00, NaN  
18-Dec-2017 23:00:00, NaN  
19-Dec-2017, NaN  
19-Dec-2017 01:00:00, NaN  
19-Dec-2017 02:00:00, NaN  
19-Dec-2017 03:00:00, NaN  
19-Dec-2017 04:00:00, NaN  
19-Dec-2017 05:00:00, NaN  
19-Dec-2017 06:00:00, NaN  
19-Dec-2017 07:00:00, NaN  
19-Dec-2017 08:00:00, NaN  
19-Dec-2017 09:00:00, NaN  
19-Dec-2017 10:00:00, NaN  
19-Dec-2017 11:00:00, NaN  
19-Dec-2017 12:00:00, NaN  
19-Dec-2017 13:00:00, NaN  
19-Dec-2017 14:00:00, NaN  
19-Dec-2017 15:00:00, NaN  
19-Dec-2017 16:00:00, NaN  
19-Dec-2017 17:00:00, NaN  
19-Dec-2017 18:00:00, NaN  
19-Dec-2017 19:00:00, NaN

|              |           |     |
|--------------|-----------|-----|
| 19-Dec-2017  | 20:00:00, | NaN |
| 19-Dec-2017  | 21:00:00, | NaN |
| 19-Dec-2017  | 22:00:00, | NaN |
| 19-Dec-2017  | 23:00:00, | NaN |
| 20-Dec-2017, |           | NaN |
| 20-Dec-2017  | 01:00:00, | NaN |
| 20-Dec-2017  | 02:00:00, | NaN |
| 20-Dec-2017  | 03:00:00, | NaN |
| 20-Dec-2017  | 04:00:00, | NaN |
| 20-Dec-2017  | 05:00:00, | NaN |
| 20-Dec-2017  | 06:00:00, | NaN |
| 20-Dec-2017  | 07:00:00, | NaN |
| 20-Dec-2017  | 08:00:00, | NaN |
| 20-Dec-2017  | 09:00:00, | NaN |
| 20-Dec-2017  | 10:00:00, | NaN |
| 20-Dec-2017  | 11:00:00, | NaN |
| 20-Dec-2017  | 12:00:00, | NaN |
| 20-Dec-2017  | 13:00:00, | NaN |
| 20-Dec-2017  | 14:00:00, | NaN |
| 20-Dec-2017  | 15:00:00, | NaN |
| 20-Dec-2017  | 16:00:00, | NaN |
| 20-Dec-2017  | 17:00:00, | NaN |
| 20-Dec-2017  | 18:00:00, | NaN |
| 20-Dec-2017  | 19:00:00, | NaN |
| 20-Dec-2017  | 20:00:00, | NaN |
| 20-Dec-2017  | 21:00:00, | NaN |
| 20-Dec-2017  | 22:00:00, | NaN |
| 20-Dec-2017  | 23:00:00, | NaN |
| 21-Dec-2017, |           | NaN |
| 21-Dec-2017  | 01:00:00, | NaN |
| 21-Dec-2017  | 02:00:00, | NaN |
| 21-Dec-2017  | 03:00:00, | NaN |
| 21-Dec-2017  | 04:00:00, | NaN |
| 21-Dec-2017  | 05:00:00, | NaN |
| 21-Dec-2017  | 06:00:00, | NaN |
| 21-Dec-2017  | 07:00:00, | NaN |
| 21-Dec-2017  | 08:00:00, | NaN |
| 21-Dec-2017  | 09:00:00, | NaN |
| 21-Dec-2017  | 10:00:00, | NaN |
| 21-Dec-2017  | 11:00:00, | NaN |
| 21-Dec-2017  | 12:00:00, | NaN |
| 21-Dec-2017  | 13:00:00, | NaN |
| 21-Dec-2017  | 14:00:00, | NaN |
| 21-Dec-2017  | 15:00:00, | NaN |
| 21-Dec-2017  | 16:00:00, | NaN |
| 21-Dec-2017  | 17:00:00, | NaN |
| 21-Dec-2017  | 18:00:00, | NaN |
| 21-Dec-2017  | 19:00:00, | NaN |
| 21-Dec-2017  | 20:00:00, | NaN |
| 21-Dec-2017  | 21:00:00, | NaN |
| 21-Dec-2017  | 22:00:00, | NaN |
| 21-Dec-2017  | 23:00:00, | NaN |
| 22-Dec-2017, |           | NaN |
| 22-Dec-2017  | 01:00:00, | NaN |
| 22-Dec-2017  | 02:00:00, | NaN |
| 22-Dec-2017  | 03:00:00, | NaN |
| 22-Dec-2017  | 04:00:00, | NaN |
| 22-Dec-2017  | 05:00:00, | NaN |
| 22-Dec-2017  | 06:00:00, | NaN |
| 22-Dec-2017  | 07:00:00, | NaN |
| 22-Dec-2017  | 08:00:00, | NaN |
| 22-Dec-2017  | 09:00:00, | NaN |
| 22-Dec-2017  | 10:00:00, | NaN |
| 22-Dec-2017  | 11:00:00, | NaN |



22-Dec-2017 12:00:00, NaN  
22-Dec-2017 13:00:00, NaN  
22-Dec-2017 14:00:00, NaN  
22-Dec-2017 15:00:00, NaN  
22-Dec-2017 16:00:00, NaN  
22-Dec-2017 17:00:00, NaN  
22-Dec-2017 18:00:00, NaN  
22-Dec-2017 19:00:00, NaN  
22-Dec-2017 20:00:00, NaN  
22-Dec-2017 21:00:00, NaN  
22-Dec-2017 22:00:00, NaN  
22-Dec-2017 23:00:00, NaN  
23-Dec-2017, NaN  
23-Dec-2017 01:00:00, NaN  
23-Dec-2017 02:00:00, NaN  
23-Dec-2017 03:00:00, NaN  
23-Dec-2017 04:00:00, NaN  
23-Dec-2017 05:00:00, NaN  
23-Dec-2017 06:00:00, NaN  
23-Dec-2017 07:00:00, NaN  
23-Dec-2017 08:00:00, NaN  
23-Dec-2017 09:00:00, NaN  
23-Dec-2017 10:00:00, NaN  
23-Dec-2017 11:00:00, NaN  
23-Dec-2017 12:00:00, NaN  
23-Dec-2017 13:00:00, NaN  
23-Dec-2017 14:00:00, NaN  
23-Dec-2017 15:00:00, NaN  
23-Dec-2017 16:00:00, NaN  
23-Dec-2017 17:00:00, NaN  
23-Dec-2017 18:00:00, NaN  
23-Dec-2017 19:00:00, NaN  
23-Dec-2017 20:00:00, NaN  
23-Dec-2017 21:00:00, NaN  
23-Dec-2017 22:00:00, NaN  
23-Dec-2017 23:00:00, NaN  
24-Dec-2017, NaN  
24-Dec-2017 01:00:00, NaN  
24-Dec-2017 02:00:00, NaN  
24-Dec-2017 03:00:00, NaN  
24-Dec-2017 04:00:00, NaN  
24-Dec-2017 05:00:00, NaN  
24-Dec-2017 06:00:00, NaN  
24-Dec-2017 07:00:00, NaN  
24-Dec-2017 08:00:00, NaN  
24-Dec-2017 09:00:00, NaN  
24-Dec-2017 10:00:00, NaN  
24-Dec-2017 11:00:00, NaN  
24-Dec-2017 12:00:00, NaN  
24-Dec-2017 13:00:00, NaN  
24-Dec-2017 14:00:00, NaN  
24-Dec-2017 15:00:00, NaN  
24-Dec-2017 16:00:00, NaN  
24-Dec-2017 17:00:00, NaN  
24-Dec-2017 18:00:00, NaN  
24-Dec-2017 19:00:00, NaN  
24-Dec-2017 20:00:00, NaN  
24-Dec-2017 21:00:00, NaN  
24-Dec-2017 22:00:00, NaN  
24-Dec-2017 23:00:00, NaN  
25-Dec-2017, NaN  
25-Dec-2017 01:00:00, NaN  
25-Dec-2017 02:00:00, NaN  
25-Dec-2017 03:00:00, NaN

25-Dec-2017 04:00:00, NaN  
25-Dec-2017 05:00:00, NaN  
25-Dec-2017 06:00:00, NaN  
25-Dec-2017 07:00:00, NaN  
25-Dec-2017 08:00:00, NaN  
25-Dec-2017 09:00:00, NaN  
25-Dec-2017 10:00:00, NaN  
25-Dec-2017 11:00:00, NaN  
25-Dec-2017 12:00:00, NaN  
25-Dec-2017 13:00:00, NaN  
25-Dec-2017 14:00:00, NaN  
25-Dec-2017 15:00:00, NaN  
25-Dec-2017 16:00:00, NaN  
25-Dec-2017 17:00:00, NaN  
25-Dec-2017 18:00:00, NaN  
25-Dec-2017 19:00:00, NaN  
25-Dec-2017 20:00:00, NaN  
25-Dec-2017 21:00:00, NaN  
25-Dec-2017 22:00:00, NaN  
25-Dec-2017 23:00:00, NaN  
26-Dec-2017, NaN  
26-Dec-2017 01:00:00, NaN  
26-Dec-2017 02:00:00, NaN  
26-Dec-2017 03:00:00, NaN  
26-Dec-2017 04:00:00, NaN  
26-Dec-2017 05:00:00, NaN  
26-Dec-2017 06:00:00, NaN  
26-Dec-2017 07:00:00, NaN  
26-Dec-2017 08:00:00, NaN  
26-Dec-2017 09:00:00, NaN  
26-Dec-2017 10:00:00, NaN  
26-Dec-2017 11:00:00, NaN  
26-Dec-2017 12:00:00, NaN  
26-Dec-2017 13:00:00, NaN  
26-Dec-2017 14:00:00, NaN  
26-Dec-2017 15:00:00, NaN  
26-Dec-2017 16:00:00, NaN  
26-Dec-2017 17:00:00, NaN  
26-Dec-2017 18:00:00, NaN  
26-Dec-2017 19:00:00, NaN  
26-Dec-2017 20:00:00, NaN  
26-Dec-2017 21:00:00, NaN  
26-Dec-2017 22:00:00, NaN  
26-Dec-2017 23:00:00, NaN  
27-Dec-2017, NaN  
27-Dec-2017 01:00:00, NaN  
27-Dec-2017 02:00:00, NaN  
27-Dec-2017 03:00:00, NaN  
27-Dec-2017 04:00:00, NaN  
27-Dec-2017 05:00:00, NaN  
27-Dec-2017 06:00:00, NaN  
27-Dec-2017 07:00:00, NaN  
27-Dec-2017 08:00:00, NaN  
27-Dec-2017 09:00:00, NaN  
27-Dec-2017 10:00:00, NaN  
27-Dec-2017 11:00:00, NaN  
27-Dec-2017 12:00:00, NaN  
27-Dec-2017 13:00:00, NaN  
27-Dec-2017 14:00:00, NaN  
27-Dec-2017 15:00:00, NaN  
27-Dec-2017 16:00:00, NaN  
27-Dec-2017 17:00:00, NaN  
27-Dec-2017 18:00:00, NaN  
27-Dec-2017 19:00:00, NaN

27-Dec-2017 20:00:00, NaN  
27-Dec-2017 21:00:00, NaN  
27-Dec-2017 22:00:00, NaN  
27-Dec-2017 23:00:00, NaN  
28-Dec-2017, NaN  
28-Dec-2017 01:00:00, NaN  
28-Dec-2017 02:00:00, NaN  
28-Dec-2017 03:00:00, NaN  
28-Dec-2017 04:00:00, NaN  
28-Dec-2017 05:00:00, NaN  
28-Dec-2017 06:00:00, NaN  
28-Dec-2017 07:00:00, NaN  
28-Dec-2017 08:00:00, NaN  
28-Dec-2017 09:00:00, NaN  
28-Dec-2017 10:00:00, NaN  
28-Dec-2017 11:00:00, NaN  
28-Dec-2017 12:00:00, NaN  
28-Dec-2017 13:00:00, NaN  
28-Dec-2017 14:00:00, NaN  
28-Dec-2017 15:00:00, NaN  
28-Dec-2017 16:00:00, NaN  
28-Dec-2017 17:00:00, NaN  
28-Dec-2017 18:00:00, NaN  
28-Dec-2017 19:00:00, NaN  
28-Dec-2017 20:00:00, NaN  
28-Dec-2017 21:00:00, NaN  
28-Dec-2017 22:00:00, NaN  
28-Dec-2017 23:00:00, NaN  
29-Dec-2017, NaN  
29-Dec-2017 01:00:00, NaN  
29-Dec-2017 02:00:00, NaN  
29-Dec-2017 03:00:00, NaN  
29-Dec-2017 04:00:00, NaN  
29-Dec-2017 05:00:00, NaN  
29-Dec-2017 06:00:00, NaN  
29-Dec-2017 07:00:00, NaN  
29-Dec-2017 08:00:00, NaN  
29-Dec-2017 09:00:00, NaN  
29-Dec-2017 10:00:00, NaN  
29-Dec-2017 11:00:00, NaN  
29-Dec-2017 12:00:00, NaN  
29-Dec-2017 13:00:00, NaN  
29-Dec-2017 14:00:00, NaN  
29-Dec-2017 15:00:00, NaN  
29-Dec-2017 16:00:00, NaN  
29-Dec-2017 17:00:00, NaN  
29-Dec-2017 18:00:00, NaN  
29-Dec-2017 19:00:00, NaN  
29-Dec-2017 20:00:00, NaN  
29-Dec-2017 21:00:00, NaN  
29-Dec-2017 22:00:00, NaN  
29-Dec-2017 23:00:00, NaN  
30-Dec-2017, NaN  
30-Dec-2017 01:00:00, NaN  
30-Dec-2017 02:00:00, NaN  
30-Dec-2017 03:00:00, NaN  
30-Dec-2017 04:00:00, NaN  
30-Dec-2017 05:00:00, NaN  
30-Dec-2017 06:00:00, NaN  
30-Dec-2017 07:00:00, NaN  
30-Dec-2017 08:00:00, NaN  
30-Dec-2017 09:00:00, NaN  
30-Dec-2017 10:00:00, NaN  
30-Dec-2017 11:00:00, NaN

30-Dec-2017 12:00:00, NaN  
30-Dec-2017 13:00:00, NaN  
30-Dec-2017 14:00:00, NaN  
30-Dec-2017 15:00:00, NaN  
30-Dec-2017 16:00:00, NaN  
30-Dec-2017 17:00:00, NaN  
30-Dec-2017 18:00:00, NaN  
30-Dec-2017 19:00:00, NaN  
30-Dec-2017 20:00:00, NaN  
30-Dec-2017 21:00:00, NaN  
30-Dec-2017 22:00:00, NaN  
30-Dec-2017 23:00:00, NaN  
31-Dec-2017, NaN  
31-Dec-2017 01:00:00, NaN  
31-Dec-2017 02:00:00, NaN  
31-Dec-2017 03:00:00, NaN  
31-Dec-2017 04:00:00, NaN  
31-Dec-2017 05:00:00, NaN  
31-Dec-2017 06:00:00, NaN  
31-Dec-2017 07:00:00, NaN  
31-Dec-2017 08:00:00, NaN  
31-Dec-2017 09:00:00, NaN  
31-Dec-2017 10:00:00, NaN  
31-Dec-2017 11:00:00, NaN  
31-Dec-2017 12:00:00, NaN  
31-Dec-2017 13:00:00, NaN  
31-Dec-2017 14:00:00, NaN  
31-Dec-2017 15:00:00, NaN  
31-Dec-2017 16:00:00, NaN  
31-Dec-2017 17:00:00, NaN  
31-Dec-2017 18:00:00, NaN  
31-Dec-2017 19:00:00, NaN  
31-Dec-2017 20:00:00, NaN  
31-Dec-2017 21:00:00, NaN  
31-Dec-2017 22:00:00, NaN  
31-Dec-2017 23:00:00, NaN  
01-Jan-2018, NaN  
01-Jan-2018 01:00:00, NaN  
01-Jan-2018 02:00:00, NaN  
01-Jan-2018 03:00:00, NaN  
01-Jan-2018 04:00:00, NaN  
01-Jan-2018 05:00:00, NaN  
01-Jan-2018 06:00:00, NaN  
01-Jan-2018 07:00:00, NaN  
01-Jan-2018 08:00:00, NaN  
01-Jan-2018 09:00:00, NaN  
01-Jan-2018 10:00:00, NaN  
01-Jan-2018 11:00:00, NaN  
01-Jan-2018 12:00:00, NaN  
01-Jan-2018 13:00:00, NaN  
01-Jan-2018 14:00:00, NaN  
01-Jan-2018 15:00:00, NaN  
01-Jan-2018 16:00:00, NaN  
01-Jan-2018 17:00:00, NaN  
01-Jan-2018 18:00:00, NaN  
01-Jan-2018 19:00:00, NaN  
01-Jan-2018 20:00:00, NaN  
01-Jan-2018 21:00:00, NaN  
01-Jan-2018 22:00:00, NaN  
01-Jan-2018 23:00:00, NaN  
02-Jan-2018, NaN  
02-Jan-2018 01:00:00, NaN  
02-Jan-2018 02:00:00, NaN  
02-Jan-2018 03:00:00, NaN

|              |           |     |
|--------------|-----------|-----|
| 02-Jan-2018  | 04:00:00, | NaN |
| 02-Jan-2018  | 05:00:00, | NaN |
| 02-Jan-2018  | 06:00:00, | NaN |
| 02-Jan-2018  | 07:00:00, | NaN |
| 02-Jan-2018  | 08:00:00, | NaN |
| 02-Jan-2018  | 09:00:00, | NaN |
| 02-Jan-2018  | 10:00:00, | NaN |
| 02-Jan-2018  | 11:00:00, | NaN |
| 02-Jan-2018  | 12:00:00, | NaN |
| 02-Jan-2018  | 13:00:00, | NaN |
| 02-Jan-2018  | 14:00:00, | NaN |
| 02-Jan-2018  | 15:00:00, | NaN |
| 02-Jan-2018  | 16:00:00, | NaN |
| 02-Jan-2018  | 17:00:00, | NaN |
| 02-Jan-2018  | 18:00:00, | NaN |
| 02-Jan-2018  | 19:00:00, | NaN |
| 02-Jan-2018  | 20:00:00, | NaN |
| 02-Jan-2018  | 21:00:00, | NaN |
| 02-Jan-2018  | 22:00:00, | NaN |
| 02-Jan-2018  | 23:00:00, | NaN |
| 03-Jan-2018, | NaN       |     |
| 03-Jan-2018  | 01:00:00, | NaN |
| 03-Jan-2018  | 02:00:00, | NaN |
| 03-Jan-2018  | 03:00:00, | NaN |
| 03-Jan-2018  | 04:00:00, | NaN |
| 03-Jan-2018  | 05:00:00, | NaN |
| 03-Jan-2018  | 06:00:00, | NaN |
| 03-Jan-2018  | 07:00:00, | NaN |
| 03-Jan-2018  | 08:00:00, | NaN |
| 03-Jan-2018  | 09:00:00, | NaN |
| 03-Jan-2018  | 10:00:00, | NaN |
| 03-Jan-2018  | 11:00:00, | NaN |
| 03-Jan-2018  | 12:00:00, | NaN |
| 03-Jan-2018  | 13:00:00, | NaN |
| 03-Jan-2018  | 14:00:00, | NaN |
| 03-Jan-2018  | 15:00:00, | NaN |
| 03-Jan-2018  | 16:00:00, | NaN |
| 03-Jan-2018  | 17:00:00, | NaN |
| 03-Jan-2018  | 18:00:00, | NaN |
| 03-Jan-2018  | 19:00:00, | NaN |
| 03-Jan-2018  | 20:00:00, | NaN |
| 03-Jan-2018  | 21:00:00, | NaN |
| 03-Jan-2018  | 22:00:00, | NaN |
| 03-Jan-2018  | 23:00:00, | NaN |
| 04-Jan-2018, | NaN       |     |
| 04-Jan-2018  | 01:00:00, | NaN |
| 04-Jan-2018  | 02:00:00, | NaN |
| 04-Jan-2018  | 03:00:00, | NaN |
| 04-Jan-2018  | 04:00:00, | NaN |
| 04-Jan-2018  | 05:00:00, | NaN |
| 04-Jan-2018  | 06:00:00, | NaN |
| 04-Jan-2018  | 07:00:00, | NaN |
| 04-Jan-2018  | 08:00:00, | NaN |
| 04-Jan-2018  | 09:00:00, | NaN |
| 04-Jan-2018  | 10:00:00, | NaN |
| 04-Jan-2018  | 11:00:00, | NaN |
| 04-Jan-2018  | 12:00:00, | NaN |
| 04-Jan-2018  | 13:00:00, | NaN |
| 04-Jan-2018  | 14:00:00, | NaN |
| 04-Jan-2018  | 15:00:00, | NaN |
| 04-Jan-2018  | 16:00:00, | NaN |
| 04-Jan-2018  | 17:00:00, | NaN |
| 04-Jan-2018  | 18:00:00, | NaN |
| 04-Jan-2018  | 19:00:00, | NaN |

04-Jan-2018 20:00:00, NaN  
04-Jan-2018 21:00:00, NaN  
04-Jan-2018 22:00:00, NaN  
04-Jan-2018 23:00:00, NaN  
05-Jan-2018, NaN  
05-Jan-2018 01:00:00, NaN  
05-Jan-2018 02:00:00, NaN  
05-Jan-2018 03:00:00, NaN  
05-Jan-2018 04:00:00, NaN  
05-Jan-2018 05:00:00, NaN  
05-Jan-2018 06:00:00, NaN  
05-Jan-2018 07:00:00, NaN  
05-Jan-2018 08:00:00, NaN  
05-Jan-2018 09:00:00, NaN  
05-Jan-2018 10:00:00, NaN  
05-Jan-2018 11:00:00, NaN  
05-Jan-2018 12:00:00, NaN  
05-Jan-2018 13:00:00, NaN  
05-Jan-2018 14:00:00, NaN  
05-Jan-2018 15:00:00, NaN  
05-Jan-2018 16:00:00, NaN  
05-Jan-2018 17:00:00, NaN  
05-Jan-2018 18:00:00, NaN  
05-Jan-2018 19:00:00, NaN  
05-Jan-2018 20:00:00, NaN  
05-Jan-2018 21:00:00, NaN  
05-Jan-2018 22:00:00, NaN  
05-Jan-2018 23:00:00, NaN  
06-Jan-2018, NaN  
06-Jan-2018 01:00:00, NaN  
06-Jan-2018 02:00:00, NaN  
06-Jan-2018 03:00:00, NaN  
06-Jan-2018 04:00:00, NaN  
06-Jan-2018 05:00:00, NaN  
06-Jan-2018 06:00:00, NaN  
06-Jan-2018 07:00:00, NaN  
06-Jan-2018 08:00:00, NaN  
06-Jan-2018 09:00:00, NaN  
06-Jan-2018 10:00:00, NaN  
06-Jan-2018 11:00:00, NaN  
06-Jan-2018 12:00:00, NaN  
06-Jan-2018 13:00:00, NaN  
06-Jan-2018 14:00:00, NaN  
06-Jan-2018 15:00:00, NaN  
06-Jan-2018 16:00:00, NaN  
06-Jan-2018 17:00:00, NaN  
06-Jan-2018 18:00:00, NaN  
06-Jan-2018 19:00:00, NaN  
06-Jan-2018 20:00:00, NaN  
06-Jan-2018 21:00:00, NaN  
06-Jan-2018 22:00:00, NaN  
06-Jan-2018 23:00:00, NaN  
07-Jan-2018, NaN  
07-Jan-2018 01:00:00, NaN  
07-Jan-2018 02:00:00, NaN  
07-Jan-2018 03:00:00, NaN  
07-Jan-2018 04:00:00, NaN  
07-Jan-2018 05:00:00, NaN  
07-Jan-2018 06:00:00, NaN  
07-Jan-2018 07:00:00, NaN  
07-Jan-2018 08:00:00, NaN  
07-Jan-2018 09:00:00, NaN  
07-Jan-2018 10:00:00, NaN  
07-Jan-2018 11:00:00, NaN

07-Jan-2018 12:00:00, NaN  
07-Jan-2018 13:00:00, NaN  
07-Jan-2018 14:00:00, NaN  
07-Jan-2018 15:00:00, NaN  
07-Jan-2018 16:00:00, NaN  
07-Jan-2018 17:00:00, NaN  
07-Jan-2018 18:00:00, NaN  
07-Jan-2018 19:00:00, NaN  
07-Jan-2018 20:00:00, NaN  
07-Jan-2018 21:00:00, NaN  
07-Jan-2018 22:00:00, NaN  
07-Jan-2018 23:00:00, NaN  
08-Jan-2018, NaN  
08-Jan-2018 01:00:00, NaN  
08-Jan-2018 02:00:00, NaN  
08-Jan-2018 03:00:00, NaN  
08-Jan-2018 04:00:00, NaN  
08-Jan-2018 05:00:00, NaN  
08-Jan-2018 06:00:00, NaN  
08-Jan-2018 07:00:00, NaN  
08-Jan-2018 08:00:00, NaN  
08-Jan-2018 09:00:00, NaN  
08-Jan-2018 10:00:00, NaN  
08-Jan-2018 11:00:00, NaN  
08-Jan-2018 12:00:00, NaN  
08-Jan-2018 13:00:00, NaN  
08-Jan-2018 14:00:00, NaN  
08-Jan-2018 15:00:00, NaN  
08-Jan-2018 16:00:00, NaN  
08-Jan-2018 17:00:00, NaN  
08-Jan-2018 18:00:00, NaN  
08-Jan-2018 19:00:00, NaN  
08-Jan-2018 20:00:00, NaN  
08-Jan-2018 21:00:00, NaN  
08-Jan-2018 22:00:00, NaN  
08-Jan-2018 23:00:00, NaN  
09-Jan-2018, NaN  
09-Jan-2018 01:00:00, NaN  
09-Jan-2018 02:00:00, NaN  
09-Jan-2018 03:00:00, NaN  
09-Jan-2018 04:00:00, NaN  
09-Jan-2018 05:00:00, NaN  
09-Jan-2018 06:00:00, NaN  
09-Jan-2018 07:00:00, NaN  
09-Jan-2018 08:00:00, NaN  
09-Jan-2018 09:00:00, NaN  
09-Jan-2018 10:00:00, NaN  
09-Jan-2018 11:00:00, NaN  
09-Jan-2018 12:00:00, NaN  
09-Jan-2018 13:00:00, NaN  
09-Jan-2018 14:00:00, NaN  
09-Jan-2018 15:00:00, NaN  
09-Jan-2018 16:00:00, NaN  
09-Jan-2018 17:00:00, NaN  
09-Jan-2018 18:00:00, NaN  
09-Jan-2018 19:00:00, NaN  
09-Jan-2018 20:00:00, NaN  
09-Jan-2018 21:00:00, NaN  
09-Jan-2018 22:00:00, NaN  
09-Jan-2018 23:00:00, NaN  
10-Jan-2018, NaN  
10-Jan-2018 01:00:00, NaN  
10-Jan-2018 02:00:00, NaN  
10-Jan-2018 03:00:00, NaN

10-Jan-2018 04:00:00, NaN  
10-Jan-2018 05:00:00, NaN  
10-Jan-2018 06:00:00, NaN  
10-Jan-2018 07:00:00, NaN  
10-Jan-2018 08:00:00, NaN  
10-Jan-2018 09:00:00, NaN  
10-Jan-2018 10:00:00, NaN  
10-Jan-2018 11:00:00, NaN  
10-Jan-2018 12:00:00, NaN  
10-Jan-2018 13:00:00, NaN  
10-Jan-2018 14:00:00, NaN  
10-Jan-2018 15:00:00, NaN  
10-Jan-2018 16:00:00, NaN  
10-Jan-2018 17:00:00, NaN  
10-Jan-2018 18:00:00, NaN  
10-Jan-2018 19:00:00, NaN  
10-Jan-2018 20:00:00, NaN  
10-Jan-2018 21:00:00, NaN  
10-Jan-2018 22:00:00, NaN  
10-Jan-2018 23:00:00, NaN  
11-Jan-2018, NaN  
11-Jan-2018 01:00:00, NaN  
11-Jan-2018 02:00:00, NaN  
11-Jan-2018 03:00:00, NaN  
11-Jan-2018 04:00:00, NaN  
11-Jan-2018 05:00:00, NaN  
11-Jan-2018 06:00:00, NaN  
11-Jan-2018 07:00:00, NaN  
11-Jan-2018 08:00:00, NaN  
11-Jan-2018 09:00:00, NaN  
11-Jan-2018 10:00:00, NaN  
11-Jan-2018 11:00:00, NaN  
11-Jan-2018 12:00:00, NaN  
11-Jan-2018 13:00:00, NaN  
11-Jan-2018 14:00:00, NaN  
11-Jan-2018 15:00:00, NaN  
11-Jan-2018 16:00:00, NaN  
11-Jan-2018 17:00:00, NaN  
11-Jan-2018 18:00:00, NaN  
11-Jan-2018 19:00:00, NaN  
11-Jan-2018 20:00:00, NaN  
11-Jan-2018 21:00:00, NaN  
11-Jan-2018 22:00:00, NaN  
11-Jan-2018 23:00:00, NaN  
12-Jan-2018, NaN  
12-Jan-2018 01:00:00, NaN  
12-Jan-2018 02:00:00, NaN  
12-Jan-2018 03:00:00, NaN  
12-Jan-2018 04:00:00, NaN  
12-Jan-2018 05:00:00, NaN  
12-Jan-2018 06:00:00, NaN  
12-Jan-2018 07:00:00, NaN  
12-Jan-2018 08:00:00, NaN  
12-Jan-2018 09:00:00, NaN  
12-Jan-2018 10:00:00, NaN  
12-Jan-2018 11:00:00, NaN  
12-Jan-2018 12:00:00, NaN  
12-Jan-2018 13:00:00, NaN  
12-Jan-2018 14:00:00, NaN  
12-Jan-2018 15:00:00, NaN  
12-Jan-2018 16:00:00, NaN  
12-Jan-2018 17:00:00, NaN  
12-Jan-2018 18:00:00, NaN  
12-Jan-2018 19:00:00, NaN



|              |           |     |
|--------------|-----------|-----|
| 12-Jan-2018  | 20:00:00, | NaN |
| 12-Jan-2018  | 21:00:00, | NaN |
| 12-Jan-2018  | 22:00:00, | NaN |
| 12-Jan-2018  | 23:00:00, | NaN |
| 13-Jan-2018, |           | NaN |
| 13-Jan-2018  | 01:00:00, | NaN |
| 13-Jan-2018  | 02:00:00, | NaN |
| 13-Jan-2018  | 03:00:00, | NaN |
| 13-Jan-2018  | 04:00:00, | NaN |
| 13-Jan-2018  | 05:00:00, | NaN |
| 13-Jan-2018  | 06:00:00, | NaN |
| 13-Jan-2018  | 07:00:00, | NaN |
| 13-Jan-2018  | 08:00:00, | NaN |
| 13-Jan-2018  | 09:00:00, | NaN |
| 13-Jan-2018  | 10:00:00, | NaN |
| 13-Jan-2018  | 11:00:00, | NaN |
| 13-Jan-2018  | 12:00:00, | NaN |
| 13-Jan-2018  | 13:00:00, | NaN |
| 13-Jan-2018  | 14:00:00, | NaN |
| 13-Jan-2018  | 15:00:00, | NaN |
| 13-Jan-2018  | 16:00:00, | NaN |
| 13-Jan-2018  | 17:00:00, | NaN |
| 13-Jan-2018  | 18:00:00, | NaN |
| 13-Jan-2018  | 19:00:00, | NaN |
| 13-Jan-2018  | 20:00:00, | NaN |
| 13-Jan-2018  | 21:00:00, | NaN |
| 13-Jan-2018  | 22:00:00, | NaN |
| 13-Jan-2018  | 23:00:00, | NaN |
| 14-Jan-2018, |           | NaN |
| 14-Jan-2018  | 01:00:00, | NaN |
| 14-Jan-2018  | 02:00:00, | NaN |
| 14-Jan-2018  | 03:00:00, | NaN |
| 14-Jan-2018  | 04:00:00, | NaN |
| 14-Jan-2018  | 05:00:00, | NaN |
| 14-Jan-2018  | 06:00:00, | NaN |
| 14-Jan-2018  | 07:00:00, | NaN |
| 14-Jan-2018  | 08:00:00, | NaN |
| 14-Jan-2018  | 09:00:00, | NaN |
| 14-Jan-2018  | 10:00:00, | NaN |
| 14-Jan-2018  | 11:00:00, | NaN |
| 14-Jan-2018  | 12:00:00, | NaN |
| 14-Jan-2018  | 13:00:00, | NaN |
| 14-Jan-2018  | 14:00:00, | NaN |
| 14-Jan-2018  | 15:00:00, | NaN |
| 14-Jan-2018  | 16:00:00, | NaN |
| 14-Jan-2018  | 17:00:00, | NaN |
| 14-Jan-2018  | 18:00:00, | NaN |
| 14-Jan-2018  | 19:00:00, | NaN |
| 14-Jan-2018  | 20:00:00, | NaN |
| 14-Jan-2018  | 21:00:00, | NaN |
| 14-Jan-2018  | 22:00:00, | NaN |
| 14-Jan-2018  | 23:00:00, | NaN |
| 15-Jan-2018, |           | NaN |
| 15-Jan-2018  | 01:00:00, | NaN |
| 15-Jan-2018  | 02:00:00, | NaN |
| 15-Jan-2018  | 03:00:00, | NaN |
| 15-Jan-2018  | 04:00:00, | NaN |
| 15-Jan-2018  | 05:00:00, | NaN |
| 15-Jan-2018  | 06:00:00, | NaN |
| 15-Jan-2018  | 07:00:00, | NaN |
| 15-Jan-2018  | 08:00:00, | NaN |
| 15-Jan-2018  | 09:00:00, | NaN |
| 15-Jan-2018  | 10:00:00, | NaN |
| 15-Jan-2018  | 11:00:00, | NaN |

15-Jan-2018 12:00:00, NaN  
15-Jan-2018 13:00:00, NaN  
15-Jan-2018 14:00:00, NaN  
15-Jan-2018 15:00:00, NaN  
15-Jan-2018 16:00:00, NaN  
15-Jan-2018 17:00:00, NaN  
15-Jan-2018 18:00:00, NaN  
15-Jan-2018 19:00:00, NaN  
15-Jan-2018 20:00:00, NaN  
15-Jan-2018 21:00:00, NaN  
15-Jan-2018 22:00:00, NaN  
15-Jan-2018 23:00:00, NaN  
16-Jan-2018, NaN  
16-Jan-2018 01:00:00, NaN  
16-Jan-2018 02:00:00, NaN  
16-Jan-2018 03:00:00, NaN  
16-Jan-2018 04:00:00, NaN  
16-Jan-2018 05:00:00, NaN  
16-Jan-2018 06:00:00, NaN  
16-Jan-2018 07:00:00, NaN  
16-Jan-2018 08:00:00, NaN  
16-Jan-2018 09:00:00, NaN  
16-Jan-2018 10:00:00, NaN  
16-Jan-2018 11:00:00, NaN  
16-Jan-2018 12:00:00, NaN  
16-Jan-2018 13:00:00, NaN  
16-Jan-2018 14:00:00, NaN  
16-Jan-2018 15:00:00, NaN  
16-Jan-2018 16:00:00, NaN  
16-Jan-2018 17:00:00, NaN  
16-Jan-2018 18:00:00, NaN  
16-Jan-2018 19:00:00, NaN  
16-Jan-2018 20:00:00, NaN  
16-Jan-2018 21:00:00, NaN  
16-Jan-2018 22:00:00, NaN  
16-Jan-2018 23:00:00, NaN  
17-Jan-2018, NaN  
17-Jan-2018 01:00:00, NaN  
17-Jan-2018 02:00:00, NaN  
17-Jan-2018 03:00:00, NaN  
17-Jan-2018 04:00:00, NaN  
17-Jan-2018 05:00:00, NaN  
17-Jan-2018 06:00:00, NaN  
17-Jan-2018 07:00:00, NaN  
17-Jan-2018 08:00:00, NaN  
17-Jan-2018 09:00:00, NaN  
17-Jan-2018 10:00:00, NaN  
17-Jan-2018 11:00:00, NaN  
17-Jan-2018 12:00:00, NaN  
17-Jan-2018 13:00:00, NaN  
17-Jan-2018 14:00:00, NaN  
17-Jan-2018 15:00:00, NaN  
17-Jan-2018 16:00:00, NaN  
17-Jan-2018 17:00:00, NaN  
17-Jan-2018 18:00:00, NaN  
17-Jan-2018 19:00:00, NaN  
17-Jan-2018 20:00:00, NaN  
17-Jan-2018 21:00:00, NaN  
17-Jan-2018 22:00:00, NaN  
17-Jan-2018 23:00:00, NaN  
18-Jan-2018, NaN  
18-Jan-2018 01:00:00, NaN  
18-Jan-2018 02:00:00, NaN  
18-Jan-2018 03:00:00, NaN

18-Jan-2018 04:00:00, NaN  
18-Jan-2018 05:00:00, NaN  
18-Jan-2018 06:00:00, NaN  
18-Jan-2018 07:00:00, NaN  
18-Jan-2018 08:00:00, NaN  
18-Jan-2018 09:00:00, NaN  
18-Jan-2018 10:00:00, NaN  
18-Jan-2018 11:00:00, NaN  
18-Jan-2018 12:00:00, NaN  
18-Jan-2018 13:00:00, NaN  
18-Jan-2018 14:00:00, NaN  
18-Jan-2018 15:00:00, NaN  
18-Jan-2018 16:00:00, NaN  
18-Jan-2018 17:00:00, NaN  
18-Jan-2018 18:00:00, NaN  
18-Jan-2018 19:00:00, NaN  
18-Jan-2018 20:00:00, NaN  
18-Jan-2018 21:00:00, NaN  
18-Jan-2018 22:00:00, NaN  
18-Jan-2018 23:00:00, NaN  
19-Jan-2018, NaN  
19-Jan-2018 01:00:00, NaN  
19-Jan-2018 02:00:00, NaN  
19-Jan-2018 03:00:00, NaN  
19-Jan-2018 04:00:00, NaN  
19-Jan-2018 05:00:00, NaN  
19-Jan-2018 06:00:00, NaN  
19-Jan-2018 07:00:00, NaN  
19-Jan-2018 08:00:00, NaN  
19-Jan-2018 09:00:00, NaN  
19-Jan-2018 10:00:00, NaN  
19-Jan-2018 11:00:00, NaN  
19-Jan-2018 12:00:00, NaN  
19-Jan-2018 13:00:00, NaN  
19-Jan-2018 14:00:00, NaN  
19-Jan-2018 15:00:00, NaN  
19-Jan-2018 16:00:00, NaN  
19-Jan-2018 17:00:00, NaN  
19-Jan-2018 18:00:00, NaN  
19-Jan-2018 19:00:00, NaN  
19-Jan-2018 20:00:00, NaN  
19-Jan-2018 21:00:00, NaN  
19-Jan-2018 22:00:00, NaN  
19-Jan-2018 23:00:00, NaN  
20-Jan-2018, NaN  
20-Jan-2018 01:00:00, NaN  
20-Jan-2018 02:00:00, NaN  
20-Jan-2018 03:00:00, NaN  
20-Jan-2018 04:00:00, NaN  
20-Jan-2018 05:00:00, NaN  
20-Jan-2018 06:00:00, NaN  
20-Jan-2018 07:00:00, NaN  
20-Jan-2018 08:00:00, NaN  
20-Jan-2018 09:00:00, NaN  
20-Jan-2018 10:00:00, NaN  
20-Jan-2018 11:00:00, NaN  
20-Jan-2018 12:00:00, NaN  
20-Jan-2018 13:00:00, NaN  
20-Jan-2018 14:00:00, NaN  
20-Jan-2018 15:00:00, NaN  
20-Jan-2018 16:00:00, NaN  
20-Jan-2018 17:00:00, NaN  
20-Jan-2018 18:00:00, NaN  
20-Jan-2018 19:00:00, NaN

|              |           |     |
|--------------|-----------|-----|
| 20-Jan-2018  | 20:00:00, | NaN |
| 20-Jan-2018  | 21:00:00, | NaN |
| 20-Jan-2018  | 22:00:00, | NaN |
| 20-Jan-2018  | 23:00:00, | NaN |
| 21-Jan-2018, |           | NaN |
| 21-Jan-2018  | 01:00:00, | NaN |
| 21-Jan-2018  | 02:00:00, | NaN |
| 21-Jan-2018  | 03:00:00, | NaN |
| 21-Jan-2018  | 04:00:00, | NaN |
| 21-Jan-2018  | 05:00:00, | NaN |
| 21-Jan-2018  | 06:00:00, | NaN |
| 21-Jan-2018  | 07:00:00, | NaN |
| 21-Jan-2018  | 08:00:00, | NaN |
| 21-Jan-2018  | 09:00:00, | NaN |
| 21-Jan-2018  | 10:00:00, | NaN |
| 21-Jan-2018  | 11:00:00, | NaN |
| 21-Jan-2018  | 12:00:00, | NaN |
| 21-Jan-2018  | 13:00:00, | NaN |
| 21-Jan-2018  | 14:00:00, | NaN |
| 21-Jan-2018  | 15:00:00, | NaN |
| 21-Jan-2018  | 16:00:00, | NaN |
| 21-Jan-2018  | 17:00:00, | NaN |
| 21-Jan-2018  | 18:00:00, | NaN |
| 21-Jan-2018  | 19:00:00, | NaN |
| 21-Jan-2018  | 20:00:00, | NaN |
| 21-Jan-2018  | 21:00:00, | NaN |
| 21-Jan-2018  | 22:00:00, | NaN |
| 21-Jan-2018  | 23:00:00, | NaN |
| 22-Jan-2018, |           | NaN |
| 22-Jan-2018  | 01:00:00, | NaN |
| 22-Jan-2018  | 02:00:00, | NaN |
| 22-Jan-2018  | 03:00:00, | NaN |
| 22-Jan-2018  | 04:00:00, | NaN |
| 22-Jan-2018  | 05:00:00, | NaN |
| 22-Jan-2018  | 06:00:00, | NaN |
| 22-Jan-2018  | 07:00:00, | NaN |
| 22-Jan-2018  | 08:00:00, | NaN |
| 22-Jan-2018  | 09:00:00, | NaN |
| 22-Jan-2018  | 10:00:00, | NaN |
| 22-Jan-2018  | 11:00:00, | NaN |
| 22-Jan-2018  | 12:00:00, | NaN |
| 22-Jan-2018  | 13:00:00, | NaN |
| 22-Jan-2018  | 14:00:00, | NaN |
| 22-Jan-2018  | 15:00:00, | NaN |
| 22-Jan-2018  | 16:00:00, | NaN |
| 22-Jan-2018  | 17:00:00, | NaN |
| 22-Jan-2018  | 18:00:00, | NaN |
| 22-Jan-2018  | 19:00:00, | NaN |
| 22-Jan-2018  | 20:00:00, | NaN |
| 22-Jan-2018  | 21:00:00, | NaN |
| 22-Jan-2018  | 22:00:00, | NaN |
| 22-Jan-2018  | 23:00:00, | NaN |
| 23-Jan-2018, |           | NaN |
| 23-Jan-2018  | 01:00:00, | NaN |
| 23-Jan-2018  | 02:00:00, | NaN |
| 23-Jan-2018  | 03:00:00, | NaN |
| 23-Jan-2018  | 04:00:00, | NaN |
| 23-Jan-2018  | 05:00:00, | NaN |
| 23-Jan-2018  | 06:00:00, | NaN |
| 23-Jan-2018  | 07:00:00, | NaN |
| 23-Jan-2018  | 08:00:00, | NaN |
| 23-Jan-2018  | 09:00:00, | NaN |
| 23-Jan-2018  | 10:00:00, | NaN |
| 23-Jan-2018  | 11:00:00, | NaN |

|              |           |     |
|--------------|-----------|-----|
| 23-Jan-2018  | 12:00:00, | NaN |
| 23-Jan-2018  | 13:00:00, | NaN |
| 23-Jan-2018  | 14:00:00, | NaN |
| 23-Jan-2018  | 15:00:00, | NaN |
| 23-Jan-2018  | 16:00:00, | NaN |
| 23-Jan-2018  | 17:00:00, | NaN |
| 23-Jan-2018  | 18:00:00, | NaN |
| 23-Jan-2018  | 19:00:00, | NaN |
| 23-Jan-2018  | 20:00:00, | NaN |
| 23-Jan-2018  | 21:00:00, | NaN |
| 23-Jan-2018  | 22:00:00, | NaN |
| 23-Jan-2018  | 23:00:00, | NaN |
| 24-Jan-2018, | NaN       |     |
| 24-Jan-2018  | 01:00:00, | NaN |
| 24-Jan-2018  | 02:00:00, | NaN |
| 24-Jan-2018  | 03:00:00, | NaN |
| 24-Jan-2018  | 04:00:00, | NaN |
| 24-Jan-2018  | 05:00:00, | NaN |
| 24-Jan-2018  | 06:00:00, | NaN |
| 24-Jan-2018  | 07:00:00, | NaN |
| 24-Jan-2018  | 08:00:00, | NaN |
| 24-Jan-2018  | 09:00:00, | NaN |
| 24-Jan-2018  | 10:00:00, | NaN |
| 24-Jan-2018  | 11:00:00, | NaN |
| 24-Jan-2018  | 12:00:00, | NaN |
| 24-Jan-2018  | 13:00:00, | NaN |
| 24-Jan-2018  | 14:00:00, | NaN |
| 24-Jan-2018  | 15:00:00, | NaN |
| 24-Jan-2018  | 16:00:00, | NaN |
| 24-Jan-2018  | 17:00:00, | NaN |
| 24-Jan-2018  | 18:00:00, | NaN |
| 24-Jan-2018  | 19:00:00, | NaN |
| 24-Jan-2018  | 20:00:00, | NaN |
| 24-Jan-2018  | 21:00:00, | NaN |
| 24-Jan-2018  | 22:00:00, | NaN |
| 24-Jan-2018  | 23:00:00, | NaN |
| 25-Jan-2018, | NaN       |     |
| 25-Jan-2018  | 01:00:00, | NaN |
| 25-Jan-2018  | 02:00:00, | NaN |
| 25-Jan-2018  | 03:00:00, | NaN |
| 25-Jan-2018  | 04:00:00, | NaN |
| 25-Jan-2018  | 05:00:00, | NaN |
| 25-Jan-2018  | 06:00:00, | NaN |
| 25-Jan-2018  | 07:00:00, | NaN |
| 25-Jan-2018  | 08:00:00, | NaN |
| 25-Jan-2018  | 09:00:00, | NaN |
| 25-Jan-2018  | 10:00:00, | NaN |
| 25-Jan-2018  | 11:00:00, | NaN |
| 25-Jan-2018  | 12:00:00, | NaN |
| 25-Jan-2018  | 13:00:00, | NaN |
| 25-Jan-2018  | 14:00:00, | NaN |
| 25-Jan-2018  | 15:00:00, | NaN |
| 25-Jan-2018  | 16:00:00, | NaN |
| 25-Jan-2018  | 17:00:00, | NaN |
| 25-Jan-2018  | 18:00:00, | NaN |
| 25-Jan-2018  | 19:00:00, | NaN |
| 25-Jan-2018  | 20:00:00, | NaN |
| 25-Jan-2018  | 21:00:00, | NaN |
| 25-Jan-2018  | 22:00:00, | NaN |
| 25-Jan-2018  | 23:00:00, | NaN |
| 26-Jan-2018, | NaN       |     |
| 26-Jan-2018  | 01:00:00, | NaN |
| 26-Jan-2018  | 02:00:00, | NaN |
| 26-Jan-2018  | 03:00:00, | NaN |

|              |           |     |
|--------------|-----------|-----|
| 26-Jan-2018  | 04:00:00, | NaN |
| 26-Jan-2018  | 05:00:00, | NaN |
| 26-Jan-2018  | 06:00:00, | NaN |
| 26-Jan-2018  | 07:00:00, | NaN |
| 26-Jan-2018  | 08:00:00, | NaN |
| 26-Jan-2018  | 09:00:00, | NaN |
| 26-Jan-2018  | 10:00:00, | NaN |
| 26-Jan-2018  | 11:00:00, | NaN |
| 26-Jan-2018  | 12:00:00, | NaN |
| 26-Jan-2018  | 13:00:00, | NaN |
| 26-Jan-2018  | 14:00:00, | NaN |
| 26-Jan-2018  | 15:00:00, | NaN |
| 26-Jan-2018  | 16:00:00, | NaN |
| 26-Jan-2018  | 17:00:00, | NaN |
| 26-Jan-2018  | 18:00:00, | NaN |
| 26-Jan-2018  | 19:00:00, | NaN |
| 26-Jan-2018  | 20:00:00, | NaN |
| 26-Jan-2018  | 21:00:00, | NaN |
| 26-Jan-2018  | 22:00:00, | NaN |
| 26-Jan-2018  | 23:00:00, | NaN |
| 27-Jan-2018, | NaN       |     |
| 27-Jan-2018  | 01:00:00, | NaN |
| 27-Jan-2018  | 02:00:00, | NaN |
| 27-Jan-2018  | 03:00:00, | NaN |
| 27-Jan-2018  | 04:00:00, | NaN |
| 27-Jan-2018  | 05:00:00, | NaN |
| 27-Jan-2018  | 06:00:00, | NaN |
| 27-Jan-2018  | 07:00:00, | NaN |
| 27-Jan-2018  | 08:00:00, | NaN |
| 27-Jan-2018  | 09:00:00, | NaN |
| 27-Jan-2018  | 10:00:00, | NaN |
| 27-Jan-2018  | 11:00:00, | NaN |
| 27-Jan-2018  | 12:00:00, | NaN |
| 27-Jan-2018  | 13:00:00, | NaN |
| 27-Jan-2018  | 14:00:00, | NaN |
| 27-Jan-2018  | 15:00:00, | NaN |
| 27-Jan-2018  | 16:00:00, | NaN |
| 27-Jan-2018  | 17:00:00, | NaN |
| 27-Jan-2018  | 18:00:00, | NaN |
| 27-Jan-2018  | 19:00:00, | NaN |
| 27-Jan-2018  | 20:00:00, | NaN |
| 27-Jan-2018  | 21:00:00, | NaN |
| 27-Jan-2018  | 22:00:00, | NaN |
| 27-Jan-2018  | 23:00:00, | NaN |
| 28-Jan-2018, | NaN       |     |
| 28-Jan-2018  | 01:00:00, | NaN |
| 28-Jan-2018  | 02:00:00, | NaN |
| 28-Jan-2018  | 03:00:00, | NaN |
| 28-Jan-2018  | 04:00:00, | NaN |
| 28-Jan-2018  | 05:00:00, | NaN |
| 28-Jan-2018  | 06:00:00, | NaN |
| 28-Jan-2018  | 07:00:00, | NaN |
| 28-Jan-2018  | 08:00:00, | NaN |
| 28-Jan-2018  | 09:00:00, | NaN |
| 28-Jan-2018  | 10:00:00, | NaN |
| 28-Jan-2018  | 11:00:00, | NaN |
| 28-Jan-2018  | 12:00:00, | NaN |
| 28-Jan-2018  | 13:00:00, | NaN |
| 28-Jan-2018  | 14:00:00, | NaN |
| 28-Jan-2018  | 15:00:00, | NaN |
| 28-Jan-2018  | 16:00:00, | NaN |
| 28-Jan-2018  | 17:00:00, | NaN |
| 28-Jan-2018  | 18:00:00, | NaN |
| 28-Jan-2018  | 19:00:00, | NaN |

|              |           |     |
|--------------|-----------|-----|
| 28-Jan-2018  | 20:00:00, | NaN |
| 28-Jan-2018  | 21:00:00, | NaN |
| 28-Jan-2018  | 22:00:00, | NaN |
| 28-Jan-2018  | 23:00:00, | NaN |
| 29-Jan-2018, |           | NaN |
| 29-Jan-2018  | 01:00:00, | NaN |
| 29-Jan-2018  | 02:00:00, | NaN |
| 29-Jan-2018  | 03:00:00, | NaN |
| 29-Jan-2018  | 04:00:00, | NaN |
| 29-Jan-2018  | 05:00:00, | NaN |
| 29-Jan-2018  | 06:00:00, | NaN |
| 29-Jan-2018  | 07:00:00, | NaN |
| 29-Jan-2018  | 08:00:00, | NaN |
| 29-Jan-2018  | 09:00:00, | NaN |
| 29-Jan-2018  | 10:00:00, | NaN |
| 29-Jan-2018  | 11:00:00, | NaN |
| 29-Jan-2018  | 12:00:00, | NaN |
| 29-Jan-2018  | 13:00:00, | NaN |
| 29-Jan-2018  | 14:00:00, | NaN |
| 29-Jan-2018  | 15:00:00, | NaN |
| 29-Jan-2018  | 16:00:00, | NaN |
| 29-Jan-2018  | 17:00:00, | NaN |
| 29-Jan-2018  | 18:00:00, | NaN |
| 29-Jan-2018  | 19:00:00, | NaN |
| 29-Jan-2018  | 20:00:00, | NaN |
| 29-Jan-2018  | 21:00:00, | NaN |
| 29-Jan-2018  | 22:00:00, | NaN |
| 29-Jan-2018  | 23:00:00, | NaN |
| 30-Jan-2018, |           | NaN |
| 30-Jan-2018  | 01:00:00, | NaN |
| 30-Jan-2018  | 02:00:00, | NaN |
| 30-Jan-2018  | 03:00:00, | NaN |
| 30-Jan-2018  | 04:00:00, | NaN |
| 30-Jan-2018  | 05:00:00, | NaN |
| 30-Jan-2018  | 06:00:00, | NaN |
| 30-Jan-2018  | 07:00:00, | NaN |
| 30-Jan-2018  | 08:00:00, | NaN |
| 30-Jan-2018  | 09:00:00, | NaN |
| 30-Jan-2018  | 10:00:00, | NaN |
| 30-Jan-2018  | 11:00:00, | NaN |
| 30-Jan-2018  | 12:00:00, | NaN |
| 30-Jan-2018  | 13:00:00, | NaN |
| 30-Jan-2018  | 14:00:00, | NaN |
| 30-Jan-2018  | 15:00:00, | NaN |
| 30-Jan-2018  | 16:00:00, | NaN |
| 30-Jan-2018  | 17:00:00, | NaN |
| 30-Jan-2018  | 18:00:00, | NaN |
| 30-Jan-2018  | 19:00:00, | NaN |
| 30-Jan-2018  | 20:00:00, | NaN |
| 30-Jan-2018  | 21:00:00, | NaN |
| 30-Jan-2018  | 22:00:00, | NaN |
| 30-Jan-2018  | 23:00:00, | NaN |
| 31-Jan-2018, |           | NaN |
| 31-Jan-2018  | 01:00:00, | NaN |
| 31-Jan-2018  | 02:00:00, | NaN |
| 31-Jan-2018  | 03:00:00, | NaN |
| 31-Jan-2018  | 04:00:00, | NaN |
| 31-Jan-2018  | 05:00:00, | NaN |
| 31-Jan-2018  | 06:00:00, | NaN |
| 31-Jan-2018  | 07:00:00, | NaN |
| 31-Jan-2018  | 08:00:00, | NaN |
| 31-Jan-2018  | 09:00:00, | NaN |
| 31-Jan-2018  | 10:00:00, | NaN |
| 31-Jan-2018  | 11:00:00, | NaN |

31-Jan-2018 12:00:00, NaN  
31-Jan-2018 13:00:00, NaN  
31-Jan-2018 14:00:00, NaN  
31-Jan-2018 15:00:00, NaN  
31-Jan-2018 16:00:00, NaN  
31-Jan-2018 17:00:00, NaN  
31-Jan-2018 18:00:00, NaN  
31-Jan-2018 19:00:00, NaN  
31-Jan-2018 20:00:00, NaN  
31-Jan-2018 21:00:00, NaN  
31-Jan-2018 22:00:00, NaN  
31-Jan-2018 23:00:00, NaN  
01-Feb-2018, NaN  
01-Feb-2018 01:00:00, NaN  
01-Feb-2018 02:00:00, NaN  
01-Feb-2018 03:00:00, NaN  
01-Feb-2018 04:00:00, NaN  
01-Feb-2018 05:00:00, NaN  
01-Feb-2018 06:00:00, NaN  
01-Feb-2018 07:00:00, NaN  
01-Feb-2018 08:00:00, NaN  
01-Feb-2018 09:00:00, NaN  
01-Feb-2018 10:00:00, NaN  
01-Feb-2018 11:00:00, NaN  
01-Feb-2018 12:00:00, NaN  
01-Feb-2018 13:00:00, NaN  
01-Feb-2018 14:00:00, NaN  
01-Feb-2018 15:00:00, NaN  
01-Feb-2018 16:00:00, NaN  
01-Feb-2018 17:00:00, NaN  
01-Feb-2018 18:00:00, NaN  
01-Feb-2018 19:00:00, NaN  
01-Feb-2018 20:00:00, NaN  
01-Feb-2018 21:00:00, NaN  
01-Feb-2018 22:00:00, NaN  
01-Feb-2018 23:00:00, NaN  
02-Feb-2018, NaN  
02-Feb-2018 01:00:00, NaN  
02-Feb-2018 02:00:00, NaN  
02-Feb-2018 03:00:00, NaN  
02-Feb-2018 04:00:00, NaN  
02-Feb-2018 05:00:00, NaN  
02-Feb-2018 06:00:00, NaN  
02-Feb-2018 07:00:00, NaN  
02-Feb-2018 08:00:00, NaN  
02-Feb-2018 09:00:00, NaN  
02-Feb-2018 10:00:00, NaN  
02-Feb-2018 11:00:00, NaN  
02-Feb-2018 12:00:00, NaN  
02-Feb-2018 13:00:00, NaN  
02-Feb-2018 14:00:00, NaN  
02-Feb-2018 15:00:00, NaN  
02-Feb-2018 16:00:00, NaN  
02-Feb-2018 17:00:00, NaN  
02-Feb-2018 18:00:00, NaN  
02-Feb-2018 19:00:00, NaN  
02-Feb-2018 20:00:00, NaN  
02-Feb-2018 21:00:00, NaN  
02-Feb-2018 22:00:00, NaN  
02-Feb-2018 23:00:00, NaN  
03-Feb-2018, NaN  
03-Feb-2018 01:00:00, NaN  
03-Feb-2018 02:00:00, NaN  
03-Feb-2018 03:00:00, NaN



|              |           |     |
|--------------|-----------|-----|
| 03-Feb-2018  | 04:00:00, | NaN |
| 03-Feb-2018  | 05:00:00, | NaN |
| 03-Feb-2018  | 06:00:00, | NaN |
| 03-Feb-2018  | 07:00:00, | NaN |
| 03-Feb-2018  | 08:00:00, | NaN |
| 03-Feb-2018  | 09:00:00, | NaN |
| 03-Feb-2018  | 10:00:00, | NaN |
| 03-Feb-2018  | 11:00:00, | NaN |
| 03-Feb-2018  | 12:00:00, | NaN |
| 03-Feb-2018  | 13:00:00, | NaN |
| 03-Feb-2018  | 14:00:00, | NaN |
| 03-Feb-2018  | 15:00:00, | NaN |
| 03-Feb-2018  | 16:00:00, | NaN |
| 03-Feb-2018  | 17:00:00, | NaN |
| 03-Feb-2018  | 18:00:00, | NaN |
| 03-Feb-2018  | 19:00:00, | NaN |
| 03-Feb-2018  | 20:00:00, | NaN |
| 03-Feb-2018  | 21:00:00, | NaN |
| 03-Feb-2018  | 22:00:00, | NaN |
| 03-Feb-2018  | 23:00:00, | NaN |
| 04-Feb-2018, | NaN       |     |
| 04-Feb-2018  | 01:00:00, | NaN |
| 04-Feb-2018  | 02:00:00, | NaN |
| 04-Feb-2018  | 03:00:00, | NaN |
| 04-Feb-2018  | 04:00:00, | NaN |
| 04-Feb-2018  | 05:00:00, | NaN |
| 04-Feb-2018  | 06:00:00, | NaN |
| 04-Feb-2018  | 07:00:00, | NaN |
| 04-Feb-2018  | 08:00:00, | NaN |
| 04-Feb-2018  | 09:00:00, | NaN |
| 04-Feb-2018  | 10:00:00, | NaN |
| 04-Feb-2018  | 11:00:00, | NaN |
| 04-Feb-2018  | 12:00:00, | NaN |
| 04-Feb-2018  | 13:00:00, | NaN |
| 04-Feb-2018  | 14:00:00, | NaN |
| 04-Feb-2018  | 15:00:00, | NaN |
| 04-Feb-2018  | 16:00:00, | NaN |
| 04-Feb-2018  | 17:00:00, | NaN |
| 04-Feb-2018  | 18:00:00, | NaN |
| 04-Feb-2018  | 19:00:00, | NaN |
| 04-Feb-2018  | 20:00:00, | NaN |
| 04-Feb-2018  | 21:00:00, | NaN |
| 04-Feb-2018  | 22:00:00, | NaN |
| 04-Feb-2018  | 23:00:00, | NaN |
| 05-Feb-2018, | NaN       |     |
| 05-Feb-2018  | 01:00:00, | NaN |
| 05-Feb-2018  | 02:00:00, | NaN |
| 05-Feb-2018  | 03:00:00, | NaN |
| 05-Feb-2018  | 04:00:00, | NaN |
| 05-Feb-2018  | 05:00:00, | NaN |
| 05-Feb-2018  | 06:00:00, | NaN |
| 05-Feb-2018  | 07:00:00, | NaN |
| 05-Feb-2018  | 08:00:00, | NaN |
| 05-Feb-2018  | 09:00:00, | NaN |
| 05-Feb-2018  | 10:00:00, | NaN |
| 05-Feb-2018  | 11:00:00, | NaN |
| 05-Feb-2018  | 12:00:00, | NaN |
| 05-Feb-2018  | 13:00:00, | NaN |
| 05-Feb-2018  | 14:00:00, | NaN |
| 05-Feb-2018  | 15:00:00, | NaN |
| 05-Feb-2018  | 16:00:00, | NaN |
| 05-Feb-2018  | 17:00:00, | NaN |
| 05-Feb-2018  | 18:00:00, | NaN |
| 05-Feb-2018  | 19:00:00, | NaN |

05-Feb-2018 20:00:00, NaN  
05-Feb-2018 21:00:00, NaN  
05-Feb-2018 22:00:00, NaN  
05-Feb-2018 23:00:00, NaN  
06-Feb-2018, NaN  
06-Feb-2018 01:00:00, NaN  
06-Feb-2018 02:00:00, NaN  
06-Feb-2018 03:00:00, NaN  
06-Feb-2018 04:00:00, NaN  
06-Feb-2018 05:00:00, NaN  
06-Feb-2018 06:00:00, NaN  
06-Feb-2018 07:00:00, NaN  
06-Feb-2018 08:00:00, NaN  
06-Feb-2018 09:00:00, NaN  
06-Feb-2018 10:00:00, NaN  
06-Feb-2018 11:00:00, NaN  
06-Feb-2018 12:00:00, NaN  
06-Feb-2018 13:00:00, NaN  
06-Feb-2018 14:00:00, NaN  
06-Feb-2018 15:00:00, NaN  
06-Feb-2018 16:00:00, NaN  
06-Feb-2018 17:00:00, NaN  
06-Feb-2018 18:00:00, NaN  
06-Feb-2018 19:00:00, NaN  
06-Feb-2018 20:00:00, NaN  
06-Feb-2018 21:00:00, NaN  
06-Feb-2018 22:00:00, NaN  
06-Feb-2018 23:00:00, NaN  
07-Feb-2018, NaN  
07-Feb-2018 01:00:00, NaN  
07-Feb-2018 02:00:00, NaN  
07-Feb-2018 03:00:00, NaN  
07-Feb-2018 04:00:00, NaN  
07-Feb-2018 05:00:00, NaN  
07-Feb-2018 06:00:00, NaN  
07-Feb-2018 07:00:00, NaN  
07-Feb-2018 08:00:00, NaN  
07-Feb-2018 09:00:00, NaN  
07-Feb-2018 10:00:00, NaN  
07-Feb-2018 11:00:00, NaN  
07-Feb-2018 12:00:00, NaN  
07-Feb-2018 13:00:00, NaN  
07-Feb-2018 14:00:00, NaN  
07-Feb-2018 15:00:00, NaN  
07-Feb-2018 16:00:00, NaN  
07-Feb-2018 17:00:00, NaN  
07-Feb-2018 18:00:00, NaN  
07-Feb-2018 19:00:00, NaN  
07-Feb-2018 20:00:00, NaN  
07-Feb-2018 21:00:00, NaN  
07-Feb-2018 22:00:00, NaN  
07-Feb-2018 23:00:00, NaN  
08-Feb-2018, NaN  
08-Feb-2018 01:00:00, NaN  
08-Feb-2018 02:00:00, NaN  
08-Feb-2018 03:00:00, NaN  
08-Feb-2018 04:00:00, NaN  
08-Feb-2018 05:00:00, NaN  
08-Feb-2018 06:00:00, NaN  
08-Feb-2018 07:00:00, NaN  
08-Feb-2018 08:00:00, NaN  
08-Feb-2018 09:00:00, NaN  
08-Feb-2018 10:00:00, NaN  
08-Feb-2018 11:00:00, NaN

08-Feb-2018 12:00:00, NaN  
08-Feb-2018 13:00:00, NaN  
08-Feb-2018 14:00:00, NaN  
08-Feb-2018 15:00:00, NaN  
08-Feb-2018 16:00:00, NaN  
08-Feb-2018 17:00:00, NaN  
08-Feb-2018 18:00:00, NaN  
08-Feb-2018 19:00:00, NaN  
08-Feb-2018 20:00:00, NaN  
08-Feb-2018 21:00:00, NaN  
08-Feb-2018 22:00:00, NaN  
08-Feb-2018 23:00:00, NaN  
09-Feb-2018, NaN  
09-Feb-2018 01:00:00, NaN  
09-Feb-2018 02:00:00, NaN  
09-Feb-2018 03:00:00, NaN  
09-Feb-2018 04:00:00, NaN  
09-Feb-2018 05:00:00, NaN  
09-Feb-2018 06:00:00, NaN  
09-Feb-2018 07:00:00, NaN  
09-Feb-2018 08:00:00, NaN  
09-Feb-2018 09:00:00, NaN  
09-Feb-2018 10:00:00, NaN  
09-Feb-2018 11:00:00, NaN  
09-Feb-2018 12:00:00, NaN  
09-Feb-2018 13:00:00, NaN  
09-Feb-2018 14:00:00, NaN  
09-Feb-2018 15:00:00, NaN  
09-Feb-2018 16:00:00, NaN  
09-Feb-2018 17:00:00, NaN  
09-Feb-2018 18:00:00, NaN  
09-Feb-2018 19:00:00, NaN  
09-Feb-2018 20:00:00, NaN  
09-Feb-2018 21:00:00, NaN  
09-Feb-2018 22:00:00, NaN  
09-Feb-2018 23:00:00, NaN  
10-Feb-2018, NaN  
10-Feb-2018 01:00:00, NaN  
10-Feb-2018 02:00:00, NaN  
10-Feb-2018 03:00:00, NaN  
10-Feb-2018 04:00:00, NaN  
10-Feb-2018 05:00:00, NaN  
10-Feb-2018 06:00:00, NaN  
10-Feb-2018 07:00:00, NaN  
10-Feb-2018 08:00:00, NaN  
10-Feb-2018 09:00:00, NaN  
10-Feb-2018 10:00:00, NaN  
10-Feb-2018 11:00:00, NaN  
10-Feb-2018 12:00:00, NaN  
10-Feb-2018 13:00:00, NaN  
10-Feb-2018 14:00:00, NaN  
10-Feb-2018 15:00:00, NaN  
10-Feb-2018 16:00:00, NaN  
10-Feb-2018 17:00:00, NaN  
10-Feb-2018 18:00:00, NaN  
10-Feb-2018 19:00:00, NaN  
10-Feb-2018 20:00:00, NaN  
10-Feb-2018 21:00:00, NaN  
10-Feb-2018 22:00:00, NaN  
10-Feb-2018 23:00:00, NaN  
11-Feb-2018, NaN  
11-Feb-2018 01:00:00, NaN  
11-Feb-2018 02:00:00, NaN  
11-Feb-2018 03:00:00, NaN

|              |           |     |
|--------------|-----------|-----|
| 11-Feb-2018  | 04:00:00, | NaN |
| 11-Feb-2018  | 05:00:00, | NaN |
| 11-Feb-2018  | 06:00:00, | NaN |
| 11-Feb-2018  | 07:00:00, | NaN |
| 11-Feb-2018  | 08:00:00, | NaN |
| 11-Feb-2018  | 09:00:00, | NaN |
| 11-Feb-2018  | 10:00:00, | NaN |
| 11-Feb-2018  | 11:00:00, | NaN |
| 11-Feb-2018  | 12:00:00, | NaN |
| 11-Feb-2018  | 13:00:00, | NaN |
| 11-Feb-2018  | 14:00:00, | NaN |
| 11-Feb-2018  | 15:00:00, | NaN |
| 11-Feb-2018  | 16:00:00, | NaN |
| 11-Feb-2018  | 17:00:00, | NaN |
| 11-Feb-2018  | 18:00:00, | NaN |
| 11-Feb-2018  | 19:00:00, | NaN |
| 11-Feb-2018  | 20:00:00, | NaN |
| 11-Feb-2018  | 21:00:00, | NaN |
| 11-Feb-2018  | 22:00:00, | NaN |
| 11-Feb-2018  | 23:00:00, | NaN |
| 12-Feb-2018, | NaN       |     |
| 12-Feb-2018  | 01:00:00, | NaN |
| 12-Feb-2018  | 02:00:00, | NaN |
| 12-Feb-2018  | 03:00:00, | NaN |
| 12-Feb-2018  | 04:00:00, | NaN |
| 12-Feb-2018  | 05:00:00, | NaN |
| 12-Feb-2018  | 06:00:00, | NaN |
| 12-Feb-2018  | 07:00:00, | NaN |
| 12-Feb-2018  | 08:00:00, | NaN |
| 12-Feb-2018  | 09:00:00, | NaN |
| 12-Feb-2018  | 10:00:00, | NaN |
| 12-Feb-2018  | 11:00:00, | NaN |
| 12-Feb-2018  | 12:00:00, | NaN |
| 12-Feb-2018  | 13:00:00, | NaN |
| 12-Feb-2018  | 14:00:00, | NaN |
| 12-Feb-2018  | 15:00:00, | NaN |
| 12-Feb-2018  | 16:00:00, | NaN |
| 12-Feb-2018  | 17:00:00, | NaN |
| 12-Feb-2018  | 18:00:00, | NaN |
| 12-Feb-2018  | 19:00:00, | NaN |
| 12-Feb-2018  | 20:00:00, | NaN |
| 12-Feb-2018  | 21:00:00, | NaN |
| 12-Feb-2018  | 22:00:00, | NaN |
| 12-Feb-2018  | 23:00:00, | NaN |
| 13-Feb-2018, | NaN       |     |
| 13-Feb-2018  | 01:00:00, | NaN |
| 13-Feb-2018  | 02:00:00, | NaN |
| 13-Feb-2018  | 03:00:00, | NaN |
| 13-Feb-2018  | 04:00:00, | NaN |
| 13-Feb-2018  | 05:00:00, | NaN |
| 13-Feb-2018  | 06:00:00, | NaN |
| 13-Feb-2018  | 07:00:00, | NaN |
| 13-Feb-2018  | 08:00:00, | NaN |
| 13-Feb-2018  | 09:00:00, | NaN |
| 13-Feb-2018  | 10:00:00, | NaN |
| 13-Feb-2018  | 11:00:00, | NaN |
| 13-Feb-2018  | 12:00:00, | NaN |
| 13-Feb-2018  | 13:00:00, | NaN |
| 13-Feb-2018  | 14:00:00, | NaN |
| 13-Feb-2018  | 15:00:00, | NaN |
| 13-Feb-2018  | 16:00:00, | NaN |
| 13-Feb-2018  | 17:00:00, | NaN |
| 13-Feb-2018  | 18:00:00, | NaN |
| 13-Feb-2018  | 19:00:00, | NaN |

13-Feb-2018 20:00:00, NaN  
13-Feb-2018 21:00:00, NaN  
13-Feb-2018 22:00:00, NaN  
13-Feb-2018 23:00:00, NaN  
14-Feb-2018, NaN  
14-Feb-2018 01:00:00, NaN  
14-Feb-2018 02:00:00, NaN  
14-Feb-2018 03:00:00, NaN  
14-Feb-2018 04:00:00, NaN  
14-Feb-2018 05:00:00, NaN  
14-Feb-2018 06:00:00, NaN  
14-Feb-2018 07:00:00, NaN  
14-Feb-2018 08:00:00, NaN  
14-Feb-2018 09:00:00, NaN  
14-Feb-2018 10:00:00, NaN  
14-Feb-2018 11:00:00, NaN  
14-Feb-2018 12:00:00, NaN  
14-Feb-2018 13:00:00, NaN  
14-Feb-2018 14:00:00, NaN  
14-Feb-2018 15:00:00, NaN  
14-Feb-2018 16:00:00, NaN  
14-Feb-2018 17:00:00, NaN  
14-Feb-2018 18:00:00, NaN  
14-Feb-2018 19:00:00, NaN  
14-Feb-2018 20:00:00, NaN  
14-Feb-2018 21:00:00, NaN  
14-Feb-2018 22:00:00, NaN  
14-Feb-2018 23:00:00, NaN  
15-Feb-2018, NaN  
15-Feb-2018 01:00:00, NaN  
15-Feb-2018 02:00:00, NaN  
15-Feb-2018 03:00:00, NaN  
15-Feb-2018 04:00:00, NaN  
15-Feb-2018 05:00:00, NaN  
15-Feb-2018 06:00:00, NaN  
15-Feb-2018 07:00:00, NaN  
15-Feb-2018 08:00:00, NaN  
15-Feb-2018 09:00:00, NaN  
15-Feb-2018 10:00:00, NaN  
15-Feb-2018 11:00:00, NaN  
15-Feb-2018 12:00:00, NaN  
15-Feb-2018 13:00:00, NaN  
15-Feb-2018 14:00:00, NaN  
15-Feb-2018 15:00:00, NaN  
15-Feb-2018 16:00:00, NaN  
15-Feb-2018 17:00:00, NaN  
15-Feb-2018 18:00:00, NaN  
15-Feb-2018 19:00:00, NaN  
15-Feb-2018 20:00:00, NaN  
15-Feb-2018 21:00:00, NaN  
15-Feb-2018 22:00:00, NaN  
15-Feb-2018 23:00:00, NaN  
16-Feb-2018, NaN  
16-Feb-2018 01:00:00, NaN  
16-Feb-2018 02:00:00, NaN  
16-Feb-2018 03:00:00, NaN  
16-Feb-2018 04:00:00, NaN  
16-Feb-2018 05:00:00, NaN  
16-Feb-2018 06:00:00, NaN  
16-Feb-2018 07:00:00, NaN  
16-Feb-2018 08:00:00, NaN  
16-Feb-2018 09:00:00, NaN  
16-Feb-2018 10:00:00, NaN  
16-Feb-2018 11:00:00, NaN

16-Feb-2018 12:00:00, NaN  
16-Feb-2018 13:00:00, NaN  
16-Feb-2018 14:00:00, NaN  
16-Feb-2018 15:00:00, NaN  
16-Feb-2018 16:00:00, NaN  
16-Feb-2018 17:00:00, NaN  
16-Feb-2018 18:00:00, NaN  
16-Feb-2018 19:00:00, NaN  
16-Feb-2018 20:00:00, NaN  
16-Feb-2018 21:00:00, NaN  
16-Feb-2018 22:00:00, NaN  
16-Feb-2018 23:00:00, NaN  
17-Feb-2018, NaN  
17-Feb-2018 01:00:00, NaN  
17-Feb-2018 02:00:00, NaN  
17-Feb-2018 03:00:00, NaN  
17-Feb-2018 04:00:00, NaN  
17-Feb-2018 05:00:00, NaN  
17-Feb-2018 06:00:00, NaN  
17-Feb-2018 07:00:00, NaN  
17-Feb-2018 08:00:00, NaN  
17-Feb-2018 09:00:00, NaN  
17-Feb-2018 10:00:00, NaN  
17-Feb-2018 11:00:00, NaN  
17-Feb-2018 12:00:00, NaN  
17-Feb-2018 13:00:00, NaN  
17-Feb-2018 14:00:00, NaN  
17-Feb-2018 15:00:00, NaN  
17-Feb-2018 16:00:00, NaN  
17-Feb-2018 17:00:00, NaN  
17-Feb-2018 18:00:00, NaN  
17-Feb-2018 19:00:00, NaN  
17-Feb-2018 20:00:00, NaN  
17-Feb-2018 21:00:00, NaN  
17-Feb-2018 22:00:00, NaN  
17-Feb-2018 23:00:00, NaN  
18-Feb-2018, NaN  
18-Feb-2018 01:00:00, NaN  
18-Feb-2018 02:00:00, NaN  
18-Feb-2018 03:00:00, NaN  
18-Feb-2018 04:00:00, NaN  
18-Feb-2018 05:00:00, NaN  
18-Feb-2018 06:00:00, NaN  
18-Feb-2018 07:00:00, NaN  
18-Feb-2018 08:00:00, NaN  
18-Feb-2018 09:00:00, NaN  
18-Feb-2018 10:00:00, NaN  
18-Feb-2018 11:00:00, NaN  
18-Feb-2018 12:00:00, NaN  
18-Feb-2018 13:00:00, NaN  
18-Feb-2018 14:00:00, NaN  
18-Feb-2018 15:00:00, NaN  
18-Feb-2018 16:00:00, NaN  
18-Feb-2018 17:00:00, NaN  
18-Feb-2018 18:00:00, NaN  
18-Feb-2018 19:00:00, NaN  
18-Feb-2018 20:00:00, NaN  
18-Feb-2018 21:00:00, NaN  
18-Feb-2018 22:00:00, NaN  
18-Feb-2018 23:00:00, NaN  
19-Feb-2018, NaN  
19-Feb-2018 01:00:00, NaN  
19-Feb-2018 02:00:00, NaN  
19-Feb-2018 03:00:00, NaN

19-Feb-2018 04:00:00, NaN  
19-Feb-2018 05:00:00, NaN  
19-Feb-2018 06:00:00, NaN  
19-Feb-2018 07:00:00, NaN  
19-Feb-2018 08:00:00, NaN  
19-Feb-2018 09:00:00, NaN  
19-Feb-2018 10:00:00, NaN  
19-Feb-2018 11:00:00, NaN  
19-Feb-2018 12:00:00, NaN  
19-Feb-2018 13:00:00, NaN  
19-Feb-2018 14:00:00, NaN  
19-Feb-2018 15:00:00, NaN  
19-Feb-2018 16:00:00, NaN  
19-Feb-2018 17:00:00, NaN  
19-Feb-2018 18:00:00, NaN  
19-Feb-2018 19:00:00, NaN  
19-Feb-2018 20:00:00, NaN  
19-Feb-2018 21:00:00, NaN  
19-Feb-2018 22:00:00, NaN  
19-Feb-2018 23:00:00, NaN  
20-Feb-2018, NaN  
20-Feb-2018 01:00:00, NaN  
20-Feb-2018 02:00:00, NaN  
20-Feb-2018 03:00:00, NaN  
20-Feb-2018 04:00:00, NaN  
20-Feb-2018 05:00:00, NaN  
20-Feb-2018 06:00:00, NaN  
20-Feb-2018 07:00:00, NaN  
20-Feb-2018 08:00:00, NaN  
20-Feb-2018 09:00:00, NaN  
20-Feb-2018 10:00:00, NaN  
20-Feb-2018 11:00:00, NaN  
20-Feb-2018 12:00:00, NaN  
20-Feb-2018 13:00:00, NaN  
20-Feb-2018 14:00:00, NaN  
20-Feb-2018 15:00:00, NaN  
20-Feb-2018 16:00:00, NaN  
20-Feb-2018 17:00:00, NaN  
20-Feb-2018 18:00:00, NaN  
20-Feb-2018 19:00:00, NaN  
20-Feb-2018 20:00:00, NaN  
20-Feb-2018 21:00:00, NaN  
20-Feb-2018 22:00:00, NaN  
20-Feb-2018 23:00:00, NaN  
21-Feb-2018, NaN  
21-Feb-2018 01:00:00, NaN  
21-Feb-2018 02:00:00, NaN  
21-Feb-2018 03:00:00, NaN  
21-Feb-2018 04:00:00, NaN  
21-Feb-2018 05:00:00, NaN  
21-Feb-2018 06:00:00, NaN  
21-Feb-2018 07:00:00, NaN  
21-Feb-2018 08:00:00, NaN  
21-Feb-2018 09:00:00, NaN  
21-Feb-2018 10:00:00, NaN  
21-Feb-2018 11:00:00, NaN  
21-Feb-2018 12:00:00, NaN  
21-Feb-2018 13:00:00, NaN  
21-Feb-2018 14:00:00, NaN  
21-Feb-2018 15:00:00, NaN  
21-Feb-2018 16:00:00, NaN  
21-Feb-2018 17:00:00, NaN  
21-Feb-2018 18:00:00, NaN  
21-Feb-2018 19:00:00, NaN

21-Feb-2018 20:00:00, NaN  
21-Feb-2018 21:00:00, NaN  
21-Feb-2018 22:00:00, NaN  
21-Feb-2018 23:00:00, NaN  
22-Feb-2018, NaN  
22-Feb-2018 01:00:00, NaN  
22-Feb-2018 02:00:00, NaN  
22-Feb-2018 03:00:00, NaN  
22-Feb-2018 04:00:00, NaN  
22-Feb-2018 05:00:00, NaN  
22-Feb-2018 06:00:00, NaN  
22-Feb-2018 07:00:00, NaN  
22-Feb-2018 08:00:00, NaN  
22-Feb-2018 09:00:00, NaN  
22-Feb-2018 10:00:00, NaN  
22-Feb-2018 11:00:00, NaN  
22-Feb-2018 12:00:00, NaN  
22-Feb-2018 13:00:00, NaN  
22-Feb-2018 14:00:00, NaN  
22-Feb-2018 15:00:00, NaN  
22-Feb-2018 16:00:00, NaN  
22-Feb-2018 17:00:00, NaN  
22-Feb-2018 18:00:00, NaN  
22-Feb-2018 19:00:00, NaN  
22-Feb-2018 20:00:00, NaN  
22-Feb-2018 21:00:00, NaN  
22-Feb-2018 22:00:00, NaN  
22-Feb-2018 23:00:00, NaN  
23-Feb-2018, NaN  
23-Feb-2018 01:00:00, NaN  
23-Feb-2018 02:00:00, NaN  
23-Feb-2018 03:00:00, NaN  
23-Feb-2018 04:00:00, NaN  
23-Feb-2018 05:00:00, NaN  
23-Feb-2018 06:00:00, NaN  
23-Feb-2018 07:00:00, NaN  
23-Feb-2018 08:00:00, NaN  
23-Feb-2018 09:00:00, NaN  
23-Feb-2018 10:00:00, NaN  
23-Feb-2018 11:00:00, NaN  
23-Feb-2018 12:00:00, NaN  
23-Feb-2018 13:00:00, NaN  
23-Feb-2018 14:00:00, NaN  
23-Feb-2018 15:00:00, NaN  
23-Feb-2018 16:00:00, NaN  
23-Feb-2018 17:00:00, NaN  
23-Feb-2018 18:00:00, NaN  
23-Feb-2018 19:00:00, NaN  
23-Feb-2018 20:00:00, NaN  
23-Feb-2018 21:00:00, NaN  
23-Feb-2018 22:00:00, NaN  
23-Feb-2018 23:00:00, NaN  
24-Feb-2018, NaN  
24-Feb-2018 01:00:00, NaN  
24-Feb-2018 02:00:00, NaN  
24-Feb-2018 03:00:00, NaN  
24-Feb-2018 04:00:00, NaN  
24-Feb-2018 05:00:00, NaN  
24-Feb-2018 06:00:00, NaN  
24-Feb-2018 07:00:00, NaN  
24-Feb-2018 08:00:00, NaN  
24-Feb-2018 09:00:00, NaN  
24-Feb-2018 10:00:00, NaN  
24-Feb-2018 11:00:00, NaN



24-Feb-2018 12:00:00, NaN  
24-Feb-2018 13:00:00, NaN  
24-Feb-2018 14:00:00, NaN  
24-Feb-2018 15:00:00, NaN  
24-Feb-2018 16:00:00, NaN  
24-Feb-2018 17:00:00, NaN  
24-Feb-2018 18:00:00, NaN  
24-Feb-2018 19:00:00, NaN  
24-Feb-2018 20:00:00, NaN  
24-Feb-2018 21:00:00, NaN  
24-Feb-2018 22:00:00, NaN  
24-Feb-2018 23:00:00, NaN  
25-Feb-2018, NaN  
25-Feb-2018 01:00:00, NaN  
25-Feb-2018 02:00:00, NaN  
25-Feb-2018 03:00:00, NaN  
25-Feb-2018 04:00:00, NaN  
25-Feb-2018 05:00:00, NaN  
25-Feb-2018 06:00:00, NaN  
25-Feb-2018 07:00:00, NaN  
25-Feb-2018 08:00:00, NaN  
25-Feb-2018 09:00:00, NaN  
25-Feb-2018 10:00:00, NaN  
25-Feb-2018 11:00:00, NaN  
25-Feb-2018 12:00:00, NaN  
25-Feb-2018 13:00:00, NaN  
25-Feb-2018 14:00:00, NaN  
25-Feb-2018 15:00:00, NaN  
25-Feb-2018 16:00:00, NaN  
25-Feb-2018 17:00:00, NaN  
25-Feb-2018 18:00:00, NaN  
25-Feb-2018 19:00:00, NaN  
25-Feb-2018 20:00:00, NaN  
25-Feb-2018 21:00:00, NaN  
25-Feb-2018 22:00:00, NaN  
25-Feb-2018 23:00:00, NaN  
26-Feb-2018, NaN  
26-Feb-2018 01:00:00, NaN  
26-Feb-2018 02:00:00, NaN  
26-Feb-2018 03:00:00, NaN  
26-Feb-2018 04:00:00, NaN  
26-Feb-2018 05:00:00, NaN  
26-Feb-2018 06:00:00, NaN  
26-Feb-2018 07:00:00, NaN  
26-Feb-2018 08:00:00, NaN  
26-Feb-2018 09:00:00, NaN  
26-Feb-2018 10:00:00, NaN  
26-Feb-2018 11:00:00, NaN  
26-Feb-2018 12:00:00, NaN  
26-Feb-2018 13:00:00, NaN  
26-Feb-2018 14:00:00, NaN  
26-Feb-2018 15:00:00, NaN  
26-Feb-2018 16:00:00, NaN  
26-Feb-2018 17:00:00, NaN  
26-Feb-2018 18:00:00, NaN  
26-Feb-2018 19:00:00, NaN  
26-Feb-2018 20:00:00, NaN  
26-Feb-2018 21:00:00, NaN  
26-Feb-2018 22:00:00, NaN  
26-Feb-2018 23:00:00, NaN  
27-Feb-2018, NaN  
27-Feb-2018 01:00:00, NaN  
27-Feb-2018 02:00:00, NaN  
27-Feb-2018 03:00:00, NaN

27-Feb-2018 04:00:00, NaN  
27-Feb-2018 05:00:00, NaN  
27-Feb-2018 06:00:00, NaN  
27-Feb-2018 07:00:00, NaN  
27-Feb-2018 08:00:00, NaN  
27-Feb-2018 09:00:00, NaN  
27-Feb-2018 10:00:00, NaN  
27-Feb-2018 11:00:00, NaN  
27-Feb-2018 12:00:00, NaN  
27-Feb-2018 13:00:00, NaN  
27-Feb-2018 14:00:00, NaN  
27-Feb-2018 15:00:00, NaN  
27-Feb-2018 16:00:00, NaN  
27-Feb-2018 17:00:00, NaN  
27-Feb-2018 18:00:00, NaN  
27-Feb-2018 19:00:00, NaN  
27-Feb-2018 20:00:00, NaN  
27-Feb-2018 21:00:00, NaN  
27-Feb-2018 22:00:00, NaN  
27-Feb-2018 23:00:00, NaN  
28-Feb-2018, NaN  
28-Feb-2018 01:00:00, NaN  
28-Feb-2018 02:00:00, NaN  
28-Feb-2018 03:00:00, NaN  
28-Feb-2018 04:00:00, NaN  
28-Feb-2018 05:00:00, NaN  
28-Feb-2018 06:00:00, NaN  
28-Feb-2018 07:00:00, NaN  
28-Feb-2018 08:00:00, NaN  
28-Feb-2018 09:00:00, NaN  
28-Feb-2018 10:00:00, NaN  
28-Feb-2018 11:00:00, NaN  
28-Feb-2018 12:00:00, NaN  
28-Feb-2018 13:00:00, NaN  
28-Feb-2018 14:00:00, NaN  
28-Feb-2018 15:00:00, NaN  
28-Feb-2018 16:00:00, NaN  
28-Feb-2018 17:00:00, NaN  
28-Feb-2018 18:00:00, NaN  
28-Feb-2018 19:00:00, NaN  
28-Feb-2018 20:00:00, NaN  
28-Feb-2018 21:00:00, NaN  
28-Feb-2018 22:00:00, NaN  
28-Feb-2018 23:00:00, NaN  
01-Mar-2018, NaN  
01-Mar-2018 01:00:00, NaN  
01-Mar-2018 02:00:00, NaN  
01-Mar-2018 03:00:00, NaN  
01-Mar-2018 04:00:00, NaN  
01-Mar-2018 05:00:00, NaN  
01-Mar-2018 06:00:00, NaN  
01-Mar-2018 07:00:00, NaN  
01-Mar-2018 08:00:00, NaN  
01-Mar-2018 09:00:00, NaN  
01-Mar-2018 10:00:00, NaN  
01-Mar-2018 11:00:00, NaN  
01-Mar-2018 12:00:00, NaN  
01-Mar-2018 13:00:00, NaN  
01-Mar-2018 14:00:00, NaN  
01-Mar-2018 15:00:00, NaN  
01-Mar-2018 16:00:00, NaN  
01-Mar-2018 17:00:00, NaN  
01-Mar-2018 18:00:00, NaN  
01-Mar-2018 19:00:00, NaN

|              |           |     |
|--------------|-----------|-----|
| 01-Mar-2018  | 20:00:00, | NaN |
| 01-Mar-2018  | 21:00:00, | NaN |
| 01-Mar-2018  | 22:00:00, | NaN |
| 01-Mar-2018  | 23:00:00, | NaN |
| 02-Mar-2018, |           | NaN |
| 02-Mar-2018  | 01:00:00, | NaN |
| 02-Mar-2018  | 02:00:00, | NaN |
| 02-Mar-2018  | 03:00:00, | NaN |
| 02-Mar-2018  | 04:00:00, | NaN |
| 02-Mar-2018  | 05:00:00, | NaN |
| 02-Mar-2018  | 06:00:00, | NaN |
| 02-Mar-2018  | 07:00:00, | NaN |
| 02-Mar-2018  | 08:00:00, | NaN |
| 02-Mar-2018  | 09:00:00, | NaN |
| 02-Mar-2018  | 10:00:00, | NaN |
| 02-Mar-2018  | 11:00:00, | NaN |
| 02-Mar-2018  | 12:00:00, | NaN |
| 02-Mar-2018  | 13:00:00, | NaN |
| 02-Mar-2018  | 14:00:00, | NaN |
| 02-Mar-2018  | 15:00:00, | NaN |
| 02-Mar-2018  | 16:00:00, | NaN |
| 02-Mar-2018  | 17:00:00, | NaN |
| 02-Mar-2018  | 18:00:00, | NaN |
| 02-Mar-2018  | 19:00:00, | NaN |
| 02-Mar-2018  | 20:00:00, | NaN |
| 02-Mar-2018  | 21:00:00, | NaN |
| 02-Mar-2018  | 22:00:00, | NaN |
| 02-Mar-2018  | 23:00:00, | NaN |
| 03-Mar-2018, |           | NaN |
| 03-Mar-2018  | 01:00:00, | NaN |
| 03-Mar-2018  | 02:00:00, | NaN |
| 03-Mar-2018  | 03:00:00, | NaN |
| 03-Mar-2018  | 04:00:00, | NaN |
| 03-Mar-2018  | 05:00:00, | NaN |
| 03-Mar-2018  | 06:00:00, | NaN |
| 03-Mar-2018  | 07:00:00, | NaN |
| 03-Mar-2018  | 08:00:00, | NaN |
| 03-Mar-2018  | 09:00:00, | NaN |
| 03-Mar-2018  | 10:00:00, | NaN |
| 03-Mar-2018  | 11:00:00, | NaN |
| 03-Mar-2018  | 12:00:00, | NaN |
| 03-Mar-2018  | 13:00:00, | NaN |
| 03-Mar-2018  | 14:00:00, | NaN |
| 03-Mar-2018  | 15:00:00, | NaN |
| 03-Mar-2018  | 16:00:00, | NaN |
| 03-Mar-2018  | 17:00:00, | NaN |
| 03-Mar-2018  | 18:00:00, | NaN |
| 03-Mar-2018  | 19:00:00, | NaN |
| 03-Mar-2018  | 20:00:00, | NaN |
| 03-Mar-2018  | 21:00:00, | NaN |
| 03-Mar-2018  | 22:00:00, | NaN |
| 03-Mar-2018  | 23:00:00, | NaN |
| 04-Mar-2018, |           | NaN |
| 04-Mar-2018  | 01:00:00, | NaN |
| 04-Mar-2018  | 02:00:00, | NaN |
| 04-Mar-2018  | 03:00:00, | NaN |
| 04-Mar-2018  | 04:00:00, | NaN |
| 04-Mar-2018  | 05:00:00, | NaN |
| 04-Mar-2018  | 06:00:00, | NaN |
| 04-Mar-2018  | 07:00:00, | NaN |
| 04-Mar-2018  | 08:00:00, | NaN |
| 04-Mar-2018  | 09:00:00, | NaN |
| 04-Mar-2018  | 10:00:00, | NaN |
| 04-Mar-2018  | 11:00:00, | NaN |

04-Mar-2018 12:00:00, NaN  
04-Mar-2018 13:00:00, NaN  
04-Mar-2018 14:00:00, NaN  
04-Mar-2018 15:00:00, NaN  
04-Mar-2018 16:00:00, NaN  
04-Mar-2018 17:00:00, NaN  
04-Mar-2018 18:00:00, NaN  
04-Mar-2018 19:00:00, NaN  
04-Mar-2018 20:00:00, NaN  
04-Mar-2018 21:00:00, NaN  
04-Mar-2018 22:00:00, NaN  
04-Mar-2018 23:00:00, NaN  
05-Mar-2018, NaN  
05-Mar-2018 01:00:00, NaN  
05-Mar-2018 02:00:00, NaN  
05-Mar-2018 03:00:00, NaN  
05-Mar-2018 04:00:00, NaN  
05-Mar-2018 05:00:00, NaN  
05-Mar-2018 06:00:00, NaN  
05-Mar-2018 07:00:00, NaN  
05-Mar-2018 08:00:00, NaN  
05-Mar-2018 09:00:00, NaN  
05-Mar-2018 10:00:00, NaN  
05-Mar-2018 11:00:00, NaN  
05-Mar-2018 12:00:00, NaN  
05-Mar-2018 13:00:00, NaN  
05-Mar-2018 14:00:00, NaN  
05-Mar-2018 15:00:00, NaN  
05-Mar-2018 16:00:00, NaN  
05-Mar-2018 17:00:00, NaN  
05-Mar-2018 18:00:00, NaN  
05-Mar-2018 19:00:00, NaN  
05-Mar-2018 20:00:00, NaN  
05-Mar-2018 21:00:00, NaN  
05-Mar-2018 22:00:00, NaN  
05-Mar-2018 23:00:00, NaN  
06-Mar-2018, NaN  
06-Mar-2018 01:00:00, NaN  
06-Mar-2018 02:00:00, NaN  
06-Mar-2018 03:00:00, NaN  
06-Mar-2018 04:00:00, NaN  
06-Mar-2018 05:00:00, NaN  
06-Mar-2018 06:00:00, NaN  
06-Mar-2018 07:00:00, NaN  
06-Mar-2018 08:00:00, NaN  
06-Mar-2018 09:00:00, NaN  
06-Mar-2018 10:00:00, NaN  
06-Mar-2018 11:00:00, NaN  
06-Mar-2018 12:00:00, NaN  
06-Mar-2018 13:00:00, NaN  
06-Mar-2018 14:00:00, NaN  
06-Mar-2018 15:00:00, NaN  
06-Mar-2018 16:00:00, NaN  
06-Mar-2018 17:00:00, NaN  
06-Mar-2018 18:00:00, NaN  
06-Mar-2018 19:00:00, NaN  
06-Mar-2018 20:00:00, NaN  
06-Mar-2018 21:00:00, NaN  
06-Mar-2018 22:00:00, NaN  
06-Mar-2018 23:00:00, NaN  
07-Mar-2018, NaN  
07-Mar-2018 01:00:00, NaN  
07-Mar-2018 02:00:00, NaN  
07-Mar-2018 03:00:00, NaN

07-Mar-2018 04:00:00, NaN  
07-Mar-2018 05:00:00, NaN  
07-Mar-2018 06:00:00, NaN  
07-Mar-2018 07:00:00, NaN  
07-Mar-2018 08:00:00, NaN  
07-Mar-2018 09:00:00, NaN  
07-Mar-2018 10:00:00, NaN  
07-Mar-2018 11:00:00, NaN  
07-Mar-2018 12:00:00, NaN  
07-Mar-2018 13:00:00, NaN  
07-Mar-2018 14:00:00, NaN  
07-Mar-2018 15:00:00, NaN  
07-Mar-2018 16:00:00, NaN  
07-Mar-2018 17:00:00, NaN  
07-Mar-2018 18:00:00, NaN  
07-Mar-2018 19:00:00, NaN  
07-Mar-2018 20:00:00, NaN  
07-Mar-2018 21:00:00, NaN  
07-Mar-2018 22:00:00, NaN  
07-Mar-2018 23:00:00, NaN  
08-Mar-2018, NaN  
08-Mar-2018 01:00:00, NaN  
08-Mar-2018 02:00:00, NaN  
08-Mar-2018 03:00:00, NaN  
08-Mar-2018 04:00:00, NaN  
08-Mar-2018 05:00:00, NaN  
08-Mar-2018 06:00:00, NaN  
08-Mar-2018 07:00:00, NaN  
08-Mar-2018 08:00:00, NaN  
08-Mar-2018 09:00:00, NaN  
08-Mar-2018 10:00:00, NaN  
08-Mar-2018 11:00:00, NaN  
08-Mar-2018 12:00:00, NaN  
08-Mar-2018 13:00:00, NaN  
08-Mar-2018 14:00:00, NaN  
08-Mar-2018 15:00:00, NaN  
08-Mar-2018 16:00:00, NaN  
08-Mar-2018 17:00:00, NaN  
08-Mar-2018 18:00:00, NaN  
08-Mar-2018 19:00:00, NaN  
08-Mar-2018 20:00:00, NaN  
08-Mar-2018 21:00:00, NaN  
08-Mar-2018 22:00:00, NaN  
08-Mar-2018 23:00:00, NaN  
09-Mar-2018, NaN  
09-Mar-2018 01:00:00, NaN  
09-Mar-2018 02:00:00, NaN  
09-Mar-2018 03:00:00, NaN  
09-Mar-2018 04:00:00, NaN  
09-Mar-2018 05:00:00, NaN  
09-Mar-2018 06:00:00, NaN  
09-Mar-2018 07:00:00, NaN  
09-Mar-2018 08:00:00, NaN  
09-Mar-2018 09:00:00, NaN  
09-Mar-2018 10:00:00, NaN  
09-Mar-2018 11:00:00, NaN  
09-Mar-2018 12:00:00, NaN  
09-Mar-2018 13:00:00, NaN  
09-Mar-2018 14:00:00, NaN  
09-Mar-2018 15:00:00, NaN  
09-Mar-2018 16:00:00, NaN  
09-Mar-2018 17:00:00, NaN  
09-Mar-2018 18:00:00, NaN  
09-Mar-2018 19:00:00, NaN

|              |           |     |
|--------------|-----------|-----|
| 09-Mar-2018  | 20:00:00, | NaN |
| 09-Mar-2018  | 21:00:00, | NaN |
| 09-Mar-2018  | 22:00:00, | NaN |
| 09-Mar-2018  | 23:00:00, | NaN |
| 10-Mar-2018, |           | NaN |
| 10-Mar-2018  | 01:00:00, | NaN |
| 10-Mar-2018  | 02:00:00, | NaN |
| 10-Mar-2018  | 03:00:00, | NaN |
| 10-Mar-2018  | 04:00:00, | NaN |
| 10-Mar-2018  | 05:00:00, | NaN |
| 10-Mar-2018  | 06:00:00, | NaN |
| 10-Mar-2018  | 07:00:00, | NaN |
| 10-Mar-2018  | 08:00:00, | NaN |
| 10-Mar-2018  | 09:00:00, | NaN |
| 10-Mar-2018  | 10:00:00, | NaN |
| 10-Mar-2018  | 11:00:00, | NaN |
| 10-Mar-2018  | 12:00:00, | NaN |
| 10-Mar-2018  | 13:00:00, | NaN |
| 10-Mar-2018  | 14:00:00, | NaN |
| 10-Mar-2018  | 15:00:00, | NaN |
| 10-Mar-2018  | 16:00:00, | NaN |
| 10-Mar-2018  | 17:00:00, | NaN |
| 10-Mar-2018  | 18:00:00, | NaN |
| 10-Mar-2018  | 19:00:00, | NaN |
| 10-Mar-2018  | 20:00:00, | NaN |
| 10-Mar-2018  | 21:00:00, | NaN |
| 10-Mar-2018  | 22:00:00, | NaN |
| 10-Mar-2018  | 23:00:00, | NaN |
| 11-Mar-2018, |           | NaN |
| 11-Mar-2018  | 01:00:00, | NaN |
| 11-Mar-2018  | 02:00:00, | NaN |
| 11-Mar-2018  | 03:00:00, | NaN |
| 11-Mar-2018  | 04:00:00, | NaN |
| 11-Mar-2018  | 05:00:00, | NaN |
| 11-Mar-2018  | 06:00:00, | NaN |
| 11-Mar-2018  | 08:00:00, | NaN |
| 11-Mar-2018  | 09:00:00, | NaN |
| 11-Mar-2018  | 10:00:00, | NaN |
| 11-Mar-2018  | 11:00:00, | NaN |
| 11-Mar-2018  | 12:00:00, | NaN |
| 11-Mar-2018  | 13:00:00, | NaN |
| 11-Mar-2018  | 14:00:00, | NaN |
| 11-Mar-2018  | 15:00:00, | NaN |
| 11-Mar-2018  | 16:00:00, | NaN |
| 11-Mar-2018  | 17:00:00, | NaN |
| 11-Mar-2018  | 18:00:00, | NaN |
| 11-Mar-2018  | 19:00:00, | NaN |
| 11-Mar-2018  | 20:00:00, | NaN |
| 11-Mar-2018  | 21:00:00, | NaN |
| 11-Mar-2018  | 22:00:00, | NaN |
| 11-Mar-2018  | 23:00:00, | NaN |
| 12-Mar-2018, |           | NaN |
| 12-Mar-2018  | 01:00:00, | NaN |
| 12-Mar-2018  | 02:00:00, | NaN |
| 12-Mar-2018  | 03:00:00, | NaN |
| 12-Mar-2018  | 04:00:00, | NaN |
| 12-Mar-2018  | 05:00:00, | NaN |
| 12-Mar-2018  | 06:00:00, | NaN |
| 12-Mar-2018  | 07:00:00, | NaN |
| 12-Mar-2018  | 08:00:00, | NaN |
| 12-Mar-2018  | 09:00:00, | NaN |
| 12-Mar-2018  | 10:00:00, | NaN |
| 12-Mar-2018  | 11:00:00, | NaN |
| 12-Mar-2018  | 12:00:00, | NaN |

12-Mar-2018 13:00:00, NaN  
12-Mar-2018 14:00:00, NaN  
12-Mar-2018 15:00:00, NaN  
12-Mar-2018 16:00:00, NaN  
12-Mar-2018 17:00:00, NaN  
12-Mar-2018 18:00:00, NaN  
12-Mar-2018 19:00:00, NaN  
12-Mar-2018 20:00:00, NaN  
12-Mar-2018 21:00:00, NaN  
12-Mar-2018 22:00:00, NaN  
12-Mar-2018 23:00:00, NaN  
13-Mar-2018, NaN  
13-Mar-2018 01:00:00, NaN  
13-Mar-2018 02:00:00, NaN  
13-Mar-2018 03:00:00, NaN  
13-Mar-2018 04:00:00, NaN  
13-Mar-2018 05:00:00, NaN  
13-Mar-2018 06:00:00, NaN  
13-Mar-2018 07:00:00, NaN  
13-Mar-2018 08:00:00, NaN  
13-Mar-2018 09:00:00, NaN  
13-Mar-2018 10:00:00, NaN  
13-Mar-2018 11:00:00, NaN  
13-Mar-2018 12:00:00, NaN  
13-Mar-2018 13:00:00, NaN  
13-Mar-2018 14:00:00, NaN  
13-Mar-2018 15:00:00, NaN  
13-Mar-2018 16:00:00, NaN  
13-Mar-2018 17:00:00, NaN  
13-Mar-2018 18:00:00, NaN  
13-Mar-2018 19:00:00, NaN  
13-Mar-2018 20:00:00, NaN  
13-Mar-2018 21:00:00, NaN  
13-Mar-2018 22:00:00, NaN  
13-Mar-2018 23:00:00, NaN  
14-Mar-2018, NaN  
14-Mar-2018 01:00:00, NaN  
14-Mar-2018 02:00:00, NaN  
14-Mar-2018 03:00:00, NaN  
14-Mar-2018 04:00:00, NaN  
14-Mar-2018 05:00:00, NaN  
14-Mar-2018 06:00:00, NaN  
14-Mar-2018 07:00:00, NaN  
14-Mar-2018 08:00:00, NaN  
14-Mar-2018 09:00:00, NaN  
14-Mar-2018 10:00:00, NaN  
14-Mar-2018 11:00:00, NaN  
14-Mar-2018 12:00:00, NaN  
14-Mar-2018 13:00:00, NaN  
14-Mar-2018 14:00:00, NaN  
14-Mar-2018 15:00:00, NaN  
14-Mar-2018 16:00:00, NaN  
14-Mar-2018 17:00:00, NaN  
14-Mar-2018 18:00:00, NaN  
14-Mar-2018 19:00:00, NaN  
14-Mar-2018 20:00:00, NaN  
14-Mar-2018 21:00:00, NaN  
14-Mar-2018 22:00:00, NaN  
14-Mar-2018 23:00:00, NaN  
15-Mar-2018, NaN  
15-Mar-2018 01:00:00, NaN  
15-Mar-2018 02:00:00, NaN  
15-Mar-2018 03:00:00, NaN  
15-Mar-2018 04:00:00, NaN

|              |           |     |
|--------------|-----------|-----|
| 15-Mar-2018  | 05:00:00, | NaN |
| 15-Mar-2018  | 06:00:00, | NaN |
| 15-Mar-2018  | 07:00:00, | NaN |
| 15-Mar-2018  | 08:00:00, | NaN |
| 15-Mar-2018  | 09:00:00, | NaN |
| 15-Mar-2018  | 10:00:00, | NaN |
| 15-Mar-2018  | 11:00:00, | NaN |
| 15-Mar-2018  | 12:00:00, | NaN |
| 15-Mar-2018  | 13:00:00, | NaN |
| 15-Mar-2018  | 14:00:00, | NaN |
| 15-Mar-2018  | 15:00:00, | NaN |
| 15-Mar-2018  | 16:00:00, | NaN |
| 15-Mar-2018  | 17:00:00, | NaN |
| 15-Mar-2018  | 18:00:00, | NaN |
| 15-Mar-2018  | 19:00:00, | NaN |
| 15-Mar-2018  | 20:00:00, | NaN |
| 15-Mar-2018  | 21:00:00, | NaN |
| 15-Mar-2018  | 22:00:00, | NaN |
| 15-Mar-2018  | 23:00:00, | NaN |
| 16-Mar-2018, | NaN       |     |
| 16-Mar-2018  | 01:00:00, | NaN |
| 16-Mar-2018  | 02:00:00, | NaN |
| 16-Mar-2018  | 03:00:00, | NaN |
| 16-Mar-2018  | 04:00:00, | NaN |
| 16-Mar-2018  | 05:00:00, | NaN |
| 16-Mar-2018  | 06:00:00, | NaN |
| 16-Mar-2018  | 07:00:00, | NaN |
| 16-Mar-2018  | 08:00:00, | NaN |
| 16-Mar-2018  | 09:00:00, | NaN |
| 16-Mar-2018  | 10:00:00, | NaN |
| 16-Mar-2018  | 11:00:00, | NaN |
| 16-Mar-2018  | 12:00:00, | NaN |
| 16-Mar-2018  | 13:00:00, | NaN |
| 16-Mar-2018  | 14:00:00, | NaN |
| 16-Mar-2018  | 15:00:00, | NaN |
| 16-Mar-2018  | 16:00:00, | NaN |
| 16-Mar-2018  | 17:00:00, | NaN |
| 16-Mar-2018  | 18:00:00, | NaN |
| 16-Mar-2018  | 19:00:00, | NaN |
| 16-Mar-2018  | 20:00:00, | NaN |
| 16-Mar-2018  | 21:00:00, | NaN |
| 16-Mar-2018  | 22:00:00, | NaN |
| 16-Mar-2018  | 23:00:00, | NaN |
| 17-Mar-2018, | NaN       |     |
| 17-Mar-2018  | 01:00:00, | NaN |
| 17-Mar-2018  | 02:00:00, | NaN |
| 17-Mar-2018  | 03:00:00, | NaN |
| 17-Mar-2018  | 04:00:00, | NaN |
| 17-Mar-2018  | 05:00:00, | NaN |
| 17-Mar-2018  | 06:00:00, | NaN |
| 17-Mar-2018  | 07:00:00, | NaN |
| 17-Mar-2018  | 08:00:00, | NaN |
| 17-Mar-2018  | 09:00:00, | NaN |
| 17-Mar-2018  | 10:00:00, | NaN |
| 17-Mar-2018  | 11:00:00, | NaN |
| 17-Mar-2018  | 12:00:00, | NaN |
| 17-Mar-2018  | 13:00:00, | NaN |
| 17-Mar-2018  | 14:00:00, | NaN |
| 17-Mar-2018  | 15:00:00, | NaN |
| 17-Mar-2018  | 16:00:00, | NaN |
| 17-Mar-2018  | 17:00:00, | NaN |
| 17-Mar-2018  | 18:00:00, | NaN |
| 17-Mar-2018  | 19:00:00, | NaN |
| 17-Mar-2018  | 20:00:00, | NaN |



17-Mar-2018 21:00:00, NaN  
17-Mar-2018 22:00:00, NaN  
17-Mar-2018 23:00:00, NaN  
18-Mar-2018, NaN  
18-Mar-2018 01:00:00, NaN  
18-Mar-2018 02:00:00, NaN  
18-Mar-2018 03:00:00, NaN  
18-Mar-2018 04:00:00, NaN  
18-Mar-2018 05:00:00, NaN  
18-Mar-2018 06:00:00, NaN  
18-Mar-2018 07:00:00, NaN  
18-Mar-2018 08:00:00, NaN  
18-Mar-2018 09:00:00, NaN  
18-Mar-2018 10:00:00, NaN  
18-Mar-2018 11:00:00, NaN  
18-Mar-2018 12:00:00, NaN  
18-Mar-2018 13:00:00, NaN  
18-Mar-2018 14:00:00, NaN  
18-Mar-2018 15:00:00, NaN  
18-Mar-2018 16:00:00, NaN  
18-Mar-2018 17:00:00, NaN  
18-Mar-2018 18:00:00, NaN  
18-Mar-2018 19:00:00, NaN  
18-Mar-2018 20:00:00, NaN  
18-Mar-2018 21:00:00, NaN  
18-Mar-2018 22:00:00, NaN  
18-Mar-2018 23:00:00, NaN  
19-Mar-2018, NaN  
19-Mar-2018 01:00:00, NaN  
19-Mar-2018 02:00:00, NaN  
19-Mar-2018 03:00:00, NaN  
19-Mar-2018 04:00:00, NaN  
19-Mar-2018 05:00:00, NaN  
19-Mar-2018 06:00:00, NaN  
19-Mar-2018 07:00:00, NaN  
19-Mar-2018 08:00:00, NaN  
19-Mar-2018 09:00:00, NaN  
19-Mar-2018 10:00:00, NaN  
19-Mar-2018 11:00:00, NaN  
19-Mar-2018 12:00:00, NaN  
19-Mar-2018 13:00:00, NaN  
19-Mar-2018 14:00:00, NaN  
19-Mar-2018 15:00:00, NaN  
19-Mar-2018 16:00:00, NaN  
19-Mar-2018 17:00:00, NaN  
19-Mar-2018 18:00:00, NaN  
19-Mar-2018 19:00:00, NaN  
19-Mar-2018 20:00:00, NaN  
19-Mar-2018 21:00:00, NaN  
19-Mar-2018 22:00:00, NaN  
19-Mar-2018 23:00:00, NaN  
20-Mar-2018, NaN  
20-Mar-2018 01:00:00, NaN  
20-Mar-2018 02:00:00, NaN  
20-Mar-2018 03:00:00, NaN  
20-Mar-2018 04:00:00, NaN  
20-Mar-2018 05:00:00, NaN  
20-Mar-2018 06:00:00, NaN  
20-Mar-2018 07:00:00, NaN  
20-Mar-2018 08:00:00, NaN  
20-Mar-2018 09:00:00, NaN  
20-Mar-2018 10:00:00, NaN  
20-Mar-2018 11:00:00, NaN  
20-Mar-2018 12:00:00, NaN

20-Mar-2018 13:00:00, NaN  
20-Mar-2018 14:00:00, NaN  
20-Mar-2018 15:00:00, NaN  
20-Mar-2018 16:00:00, NaN  
20-Mar-2018 17:00:00, NaN  
20-Mar-2018 18:00:00, NaN  
20-Mar-2018 19:00:00, NaN  
20-Mar-2018 20:00:00, NaN  
20-Mar-2018 21:00:00, NaN  
20-Mar-2018 22:00:00, NaN  
20-Mar-2018 23:00:00, NaN  
21-Mar-2018, NaN  
21-Mar-2018 01:00:00, NaN  
21-Mar-2018 02:00:00, NaN  
21-Mar-2018 03:00:00, NaN  
21-Mar-2018 04:00:00, NaN  
21-Mar-2018 05:00:00, NaN  
21-Mar-2018 06:00:00, NaN  
21-Mar-2018 07:00:00, NaN  
21-Mar-2018 08:00:00, NaN  
21-Mar-2018 09:00:00, NaN  
21-Mar-2018 10:00:00, NaN  
21-Mar-2018 11:00:00, NaN  
21-Mar-2018 12:00:00, NaN  
21-Mar-2018 13:00:00, NaN  
21-Mar-2018 14:00:00, NaN  
21-Mar-2018 15:00:00, NaN  
21-Mar-2018 16:00:00, NaN  
21-Mar-2018 17:00:00, NaN  
21-Mar-2018 18:00:00, NaN  
21-Mar-2018 19:00:00, NaN  
21-Mar-2018 20:00:00, NaN  
21-Mar-2018 21:00:00, NaN  
21-Mar-2018 22:00:00, NaN  
21-Mar-2018 23:00:00, NaN  
22-Mar-2018, NaN  
22-Mar-2018 01:00:00, NaN  
22-Mar-2018 02:00:00, NaN  
22-Mar-2018 03:00:00, NaN  
22-Mar-2018 04:00:00, NaN  
22-Mar-2018 05:00:00, NaN  
22-Mar-2018 06:00:00, NaN  
22-Mar-2018 07:00:00, NaN  
22-Mar-2018 08:00:00, NaN  
22-Mar-2018 09:00:00, NaN  
22-Mar-2018 10:00:00, NaN  
22-Mar-2018 11:00:00, NaN  
22-Mar-2018 12:00:00, NaN  
22-Mar-2018 13:00:00, NaN  
22-Mar-2018 14:00:00, NaN  
22-Mar-2018 15:00:00, NaN  
22-Mar-2018 16:00:00, NaN  
22-Mar-2018 17:00:00, NaN  
22-Mar-2018 18:00:00, NaN  
22-Mar-2018 19:00:00, NaN  
22-Mar-2018 20:00:00, NaN  
22-Mar-2018 21:00:00, NaN  
22-Mar-2018 22:00:00, NaN  
22-Mar-2018 23:00:00, NaN  
23-Mar-2018, NaN  
23-Mar-2018 01:00:00, NaN  
23-Mar-2018 02:00:00, NaN  
23-Mar-2018 03:00:00, NaN  
23-Mar-2018 04:00:00, NaN

|              |           |     |
|--------------|-----------|-----|
| 23-Mar-2018  | 05:00:00, | NaN |
| 23-Mar-2018  | 06:00:00, | NaN |
| 23-Mar-2018  | 07:00:00, | NaN |
| 23-Mar-2018  | 08:00:00, | NaN |
| 23-Mar-2018  | 09:00:00, | NaN |
| 23-Mar-2018  | 10:00:00, | NaN |
| 23-Mar-2018  | 11:00:00, | NaN |
| 23-Mar-2018  | 12:00:00, | NaN |
| 23-Mar-2018  | 13:00:00, | NaN |
| 23-Mar-2018  | 14:00:00, | NaN |
| 23-Mar-2018  | 15:00:00, | NaN |
| 23-Mar-2018  | 16:00:00, | NaN |
| 23-Mar-2018  | 17:00:00, | NaN |
| 23-Mar-2018  | 18:00:00, | NaN |
| 23-Mar-2018  | 19:00:00, | NaN |
| 23-Mar-2018  | 20:00:00, | NaN |
| 23-Mar-2018  | 21:00:00, | NaN |
| 23-Mar-2018  | 22:00:00, | NaN |
| 23-Mar-2018  | 23:00:00, | NaN |
| 24-Mar-2018, | NaN       |     |
| 24-Mar-2018  | 01:00:00, | NaN |
| 24-Mar-2018  | 02:00:00, | NaN |
| 24-Mar-2018  | 03:00:00, | NaN |
| 24-Mar-2018  | 04:00:00, | NaN |
| 24-Mar-2018  | 05:00:00, | NaN |
| 24-Mar-2018  | 06:00:00, | NaN |
| 24-Mar-2018  | 07:00:00, | NaN |
| 24-Mar-2018  | 08:00:00, | NaN |
| 24-Mar-2018  | 09:00:00, | NaN |
| 24-Mar-2018  | 10:00:00, | NaN |
| 24-Mar-2018  | 11:00:00, | NaN |
| 24-Mar-2018  | 12:00:00, | NaN |
| 24-Mar-2018  | 13:00:00, | NaN |
| 24-Mar-2018  | 14:00:00, | NaN |
| 24-Mar-2018  | 15:00:00, | NaN |
| 24-Mar-2018  | 16:00:00, | NaN |
| 24-Mar-2018  | 17:00:00, | NaN |
| 24-Mar-2018  | 18:00:00, | NaN |
| 24-Mar-2018  | 19:00:00, | NaN |
| 24-Mar-2018  | 20:00:00, | NaN |
| 24-Mar-2018  | 21:00:00, | NaN |
| 24-Mar-2018  | 22:00:00, | NaN |
| 24-Mar-2018  | 23:00:00, | NaN |
| 25-Mar-2018, | NaN       |     |
| 25-Mar-2018  | 01:00:00, | NaN |
| 25-Mar-2018  | 02:00:00, | NaN |
| 25-Mar-2018  | 03:00:00, | NaN |
| 25-Mar-2018  | 04:00:00, | NaN |
| 25-Mar-2018  | 05:00:00, | NaN |
| 25-Mar-2018  | 06:00:00, | NaN |
| 25-Mar-2018  | 07:00:00, | NaN |
| 25-Mar-2018  | 08:00:00, | NaN |
| 25-Mar-2018  | 09:00:00, | NaN |
| 25-Mar-2018  | 10:00:00, | NaN |
| 25-Mar-2018  | 11:00:00, | NaN |
| 25-Mar-2018  | 12:00:00, | NaN |
| 25-Mar-2018  | 13:00:00, | NaN |
| 25-Mar-2018  | 14:00:00, | NaN |
| 25-Mar-2018  | 15:00:00, | NaN |
| 25-Mar-2018  | 16:00:00, | NaN |
| 25-Mar-2018  | 17:00:00, | NaN |
| 25-Mar-2018  | 18:00:00, | NaN |
| 25-Mar-2018  | 19:00:00, | NaN |
| 25-Mar-2018  | 20:00:00, | NaN |

25-Mar-2018 21:00:00, NaN  
25-Mar-2018 22:00:00, NaN  
25-Mar-2018 23:00:00, NaN  
26-Mar-2018, NaN  
26-Mar-2018 01:00:00, NaN  
26-Mar-2018 02:00:00, NaN  
26-Mar-2018 03:00:00, NaN  
26-Mar-2018 04:00:00, NaN  
26-Mar-2018 05:00:00, NaN  
26-Mar-2018 06:00:00, NaN  
26-Mar-2018 07:00:00, NaN  
26-Mar-2018 08:00:00, NaN  
26-Mar-2018 09:00:00, NaN  
26-Mar-2018 10:00:00, NaN  
26-Mar-2018 11:00:00, NaN  
26-Mar-2018 12:00:00, NaN  
26-Mar-2018 13:00:00, NaN  
26-Mar-2018 14:00:00, NaN  
26-Mar-2018 15:00:00, NaN  
26-Mar-2018 16:00:00, NaN  
26-Mar-2018 17:00:00, NaN  
26-Mar-2018 18:00:00, NaN  
26-Mar-2018 19:00:00, NaN  
26-Mar-2018 20:00:00, NaN  
26-Mar-2018 21:00:00, NaN  
26-Mar-2018 22:00:00, NaN  
26-Mar-2018 23:00:00, NaN  
27-Mar-2018, NaN  
27-Mar-2018 01:00:00, NaN  
27-Mar-2018 02:00:00, NaN  
27-Mar-2018 03:00:00, NaN  
27-Mar-2018 04:00:00, NaN  
27-Mar-2018 05:00:00, NaN  
27-Mar-2018 06:00:00, NaN  
27-Mar-2018 07:00:00, NaN  
27-Mar-2018 08:00:00, NaN  
27-Mar-2018 09:00:00, NaN  
27-Mar-2018 10:00:00, NaN  
27-Mar-2018 11:00:00, NaN  
27-Mar-2018 12:00:00, NaN  
27-Mar-2018 13:00:00, NaN  
27-Mar-2018 14:00:00, NaN  
27-Mar-2018 15:00:00, NaN  
27-Mar-2018 16:00:00, NaN  
27-Mar-2018 17:00:00, NaN  
27-Mar-2018 18:00:00, NaN  
27-Mar-2018 19:00:00, NaN  
27-Mar-2018 20:00:00, NaN  
27-Mar-2018 21:00:00, NaN  
27-Mar-2018 22:00:00, NaN  
27-Mar-2018 23:00:00, NaN  
28-Mar-2018, NaN  
28-Mar-2018 01:00:00, NaN  
28-Mar-2018 02:00:00, NaN  
28-Mar-2018 03:00:00, NaN  
28-Mar-2018 04:00:00, NaN  
28-Mar-2018 05:00:00, NaN  
28-Mar-2018 06:00:00, NaN  
28-Mar-2018 07:00:00, NaN  
28-Mar-2018 08:00:00, NaN  
28-Mar-2018 09:00:00, NaN  
28-Mar-2018 10:00:00, NaN  
28-Mar-2018 11:00:00, NaN  
28-Mar-2018 12:00:00, NaN

28-Mar-2018 13:00:00, NaN  
28-Mar-2018 14:00:00, NaN  
28-Mar-2018 15:00:00, NaN  
28-Mar-2018 16:00:00, NaN  
28-Mar-2018 17:00:00, NaN  
28-Mar-2018 18:00:00, NaN  
28-Mar-2018 19:00:00, NaN  
28-Mar-2018 20:00:00, NaN  
28-Mar-2018 21:00:00, NaN  
28-Mar-2018 22:00:00, NaN  
28-Mar-2018 23:00:00, NaN  
29-Mar-2018, NaN  
29-Mar-2018 01:00:00, NaN  
29-Mar-2018 02:00:00, NaN  
29-Mar-2018 03:00:00, NaN  
29-Mar-2018 04:00:00, NaN  
29-Mar-2018 05:00:00, NaN  
29-Mar-2018 06:00:00, NaN  
29-Mar-2018 07:00:00, NaN  
29-Mar-2018 08:00:00, NaN  
29-Mar-2018 09:00:00, NaN  
29-Mar-2018 10:00:00, NaN  
29-Mar-2018 11:00:00, NaN  
29-Mar-2018 12:00:00, NaN  
29-Mar-2018 13:00:00, NaN  
29-Mar-2018 14:00:00, NaN  
29-Mar-2018 15:00:00, NaN  
29-Mar-2018 16:00:00, NaN  
29-Mar-2018 17:00:00, NaN  
29-Mar-2018 18:00:00, NaN  
29-Mar-2018 19:00:00, NaN  
29-Mar-2018 20:00:00, NaN  
29-Mar-2018 21:00:00, NaN  
29-Mar-2018 22:00:00, NaN  
29-Mar-2018 23:00:00, NaN  
30-Mar-2018, NaN  
30-Mar-2018 01:00:00, NaN  
30-Mar-2018 02:00:00, NaN  
30-Mar-2018 03:00:00, NaN  
30-Mar-2018 04:00:00, NaN  
30-Mar-2018 05:00:00, NaN  
30-Mar-2018 06:00:00, NaN  
30-Mar-2018 07:00:00, NaN  
30-Mar-2018 08:00:00, NaN  
30-Mar-2018 09:00:00, NaN  
30-Mar-2018 10:00:00, NaN  
30-Mar-2018 11:00:00, NaN  
30-Mar-2018 12:00:00, NaN  
30-Mar-2018 13:00:00, NaN  
30-Mar-2018 14:00:00, NaN  
30-Mar-2018 15:00:00, NaN  
30-Mar-2018 16:00:00, NaN  
30-Mar-2018 17:00:00, NaN  
30-Mar-2018 18:00:00, NaN  
30-Mar-2018 19:00:00, NaN  
30-Mar-2018 20:00:00, NaN  
30-Mar-2018 21:00:00, NaN  
30-Mar-2018 22:00:00, NaN  
30-Mar-2018 23:00:00, NaN  
31-Mar-2018, NaN  
31-Mar-2018 01:00:00, NaN  
31-Mar-2018 02:00:00, NaN  
31-Mar-2018 03:00:00, NaN  
31-Mar-2018 04:00:00, NaN

|              |           |     |
|--------------|-----------|-----|
| 31-Mar-2018  | 05:00:00, | NaN |
| 31-Mar-2018  | 06:00:00, | NaN |
| 31-Mar-2018  | 07:00:00, | NaN |
| 31-Mar-2018  | 08:00:00, | NaN |
| 31-Mar-2018  | 09:00:00, | NaN |
| 31-Mar-2018  | 10:00:00, | NaN |
| 31-Mar-2018  | 11:00:00, | NaN |
| 31-Mar-2018  | 12:00:00, | NaN |
| 31-Mar-2018  | 13:00:00, | NaN |
| 31-Mar-2018  | 14:00:00, | NaN |
| 31-Mar-2018  | 15:00:00, | NaN |
| 31-Mar-2018  | 16:00:00, | NaN |
| 31-Mar-2018  | 17:00:00, | NaN |
| 31-Mar-2018  | 18:00:00, | NaN |
| 31-Mar-2018  | 19:00:00, | NaN |
| 31-Mar-2018  | 20:00:00, | NaN |
| 31-Mar-2018  | 21:00:00, | NaN |
| 31-Mar-2018  | 22:00:00, | NaN |
| 31-Mar-2018  | 23:00:00, | NaN |
| 01-Apr-2018, | NaN       |     |
| 01-Apr-2018  | 01:00:00, | NaN |
| 01-Apr-2018  | 02:00:00, | NaN |
| 01-Apr-2018  | 03:00:00, | NaN |
| 01-Apr-2018  | 04:00:00, | NaN |
| 01-Apr-2018  | 05:00:00, | NaN |
| 01-Apr-2018  | 06:00:00, | NaN |
| 01-Apr-2018  | 07:00:00, | NaN |
| 01-Apr-2018  | 08:00:00, | NaN |
| 01-Apr-2018  | 09:00:00, | NaN |
| 01-Apr-2018  | 10:00:00, | NaN |
| 01-Apr-2018  | 11:00:00, | NaN |
| 01-Apr-2018  | 12:00:00, | NaN |
| 01-Apr-2018  | 13:00:00, | NaN |
| 01-Apr-2018  | 14:00:00, | NaN |
| 01-Apr-2018  | 15:00:00, | NaN |
| 01-Apr-2018  | 16:00:00, | NaN |
| 01-Apr-2018  | 17:00:00, | NaN |
| 01-Apr-2018  | 18:00:00, | NaN |
| 01-Apr-2018  | 19:00:00, | NaN |
| 01-Apr-2018  | 20:00:00, | NaN |
| 01-Apr-2018  | 21:00:00, | NaN |
| 01-Apr-2018  | 22:00:00, | NaN |
| 01-Apr-2018  | 23:00:00, | NaN |
| 02-Apr-2018, | NaN       |     |
| 02-Apr-2018  | 01:00:00, | NaN |
| 02-Apr-2018  | 02:00:00, | NaN |
| 02-Apr-2018  | 03:00:00, | NaN |
| 02-Apr-2018  | 04:00:00, | NaN |
| 02-Apr-2018  | 05:00:00, | NaN |
| 02-Apr-2018  | 06:00:00, | NaN |
| 02-Apr-2018  | 07:00:00, | NaN |
| 02-Apr-2018  | 08:00:00, | NaN |
| 02-Apr-2018  | 09:00:00, | NaN |
| 02-Apr-2018  | 10:00:00, | NaN |
| 02-Apr-2018  | 11:00:00, | NaN |
| 02-Apr-2018  | 12:00:00, | NaN |
| 02-Apr-2018  | 13:00:00, | NaN |
| 02-Apr-2018  | 14:00:00, | NaN |
| 02-Apr-2018  | 15:00:00, | NaN |
| 02-Apr-2018  | 16:00:00, | NaN |
| 02-Apr-2018  | 17:00:00, | NaN |
| 02-Apr-2018  | 18:00:00, | NaN |
| 02-Apr-2018  | 19:00:00, | NaN |
| 02-Apr-2018  | 20:00:00, | NaN |

02-Apr-2018 21:00:00, NaN  
02-Apr-2018 22:00:00, NaN  
02-Apr-2018 23:00:00, NaN  
03-Apr-2018, NaN  
03-Apr-2018 01:00:00, NaN  
03-Apr-2018 02:00:00, NaN  
03-Apr-2018 03:00:00, NaN  
03-Apr-2018 04:00:00, NaN  
03-Apr-2018 05:00:00, NaN  
03-Apr-2018 06:00:00, NaN  
03-Apr-2018 07:00:00, NaN  
03-Apr-2018 08:00:00, NaN  
03-Apr-2018 09:00:00, NaN  
03-Apr-2018 10:00:00, NaN  
03-Apr-2018 11:00:00, NaN  
03-Apr-2018 12:00:00, NaN  
03-Apr-2018 13:00:00, NaN  
03-Apr-2018 14:00:00, NaN  
03-Apr-2018 15:00:00, NaN  
03-Apr-2018 16:00:00, NaN  
03-Apr-2018 17:00:00, NaN  
03-Apr-2018 18:00:00, NaN  
03-Apr-2018 19:00:00, NaN  
03-Apr-2018 20:00:00, NaN  
03-Apr-2018 21:00:00, NaN  
03-Apr-2018 22:00:00, NaN  
03-Apr-2018 23:00:00, NaN  
04-Apr-2018, NaN  
04-Apr-2018 01:00:00, NaN  
04-Apr-2018 02:00:00, NaN  
04-Apr-2018 03:00:00, NaN  
04-Apr-2018 04:00:00, NaN  
04-Apr-2018 05:00:00, NaN  
04-Apr-2018 06:00:00, NaN  
04-Apr-2018 07:00:00, NaN  
04-Apr-2018 08:00:00, NaN  
04-Apr-2018 09:00:00, NaN  
04-Apr-2018 10:00:00, NaN  
04-Apr-2018 11:00:00, NaN  
04-Apr-2018 12:00:00, NaN  
04-Apr-2018 13:00:00, NaN  
04-Apr-2018 14:00:00, NaN  
04-Apr-2018 15:00:00, NaN  
04-Apr-2018 16:00:00, NaN  
04-Apr-2018 17:00:00, NaN  
04-Apr-2018 18:00:00, NaN  
04-Apr-2018 19:00:00, NaN  
04-Apr-2018 20:00:00, NaN  
04-Apr-2018 21:00:00, NaN  
04-Apr-2018 22:00:00, NaN  
04-Apr-2018 23:00:00, NaN  
05-Apr-2018, NaN  
05-Apr-2018 01:00:00, NaN  
05-Apr-2018 02:00:00, NaN  
05-Apr-2018 03:00:00, NaN  
05-Apr-2018 04:00:00, NaN  
05-Apr-2018 05:00:00, NaN  
05-Apr-2018 06:00:00, NaN  
05-Apr-2018 07:00:00, NaN  
05-Apr-2018 08:00:00, NaN  
05-Apr-2018 09:00:00, NaN  
05-Apr-2018 10:00:00, NaN  
05-Apr-2018 11:00:00, NaN  
05-Apr-2018 12:00:00, NaN

05-Apr-2018 13:00:00, NaN  
05-Apr-2018 14:00:00, NaN  
05-Apr-2018 15:00:00, NaN  
05-Apr-2018 16:00:00, NaN  
05-Apr-2018 17:00:00, NaN  
05-Apr-2018 18:00:00, NaN  
05-Apr-2018 19:00:00, NaN  
05-Apr-2018 20:00:00, NaN  
05-Apr-2018 21:00:00, NaN  
05-Apr-2018 22:00:00, NaN  
05-Apr-2018 23:00:00, NaN  
06-Apr-2018, NaN  
06-Apr-2018 01:00:00, NaN  
06-Apr-2018 02:00:00, NaN  
06-Apr-2018 03:00:00, NaN  
06-Apr-2018 04:00:00, NaN  
06-Apr-2018 05:00:00, NaN  
06-Apr-2018 06:00:00, NaN  
06-Apr-2018 07:00:00, NaN  
06-Apr-2018 08:00:00, NaN  
06-Apr-2018 09:00:00, NaN  
06-Apr-2018 10:00:00, NaN  
06-Apr-2018 11:00:00, NaN  
06-Apr-2018 12:00:00, NaN  
06-Apr-2018 13:00:00, NaN  
06-Apr-2018 14:00:00, NaN  
06-Apr-2018 15:00:00, NaN  
06-Apr-2018 16:00:00, NaN  
06-Apr-2018 17:00:00, NaN  
06-Apr-2018 18:00:00, NaN  
06-Apr-2018 19:00:00, NaN  
06-Apr-2018 20:00:00, NaN  
06-Apr-2018 21:00:00, NaN  
06-Apr-2018 22:00:00, NaN  
06-Apr-2018 23:00:00, NaN  
07-Apr-2018, NaN  
07-Apr-2018 01:00:00, NaN  
07-Apr-2018 02:00:00, NaN  
07-Apr-2018 03:00:00, NaN  
07-Apr-2018 04:00:00, NaN  
07-Apr-2018 05:00:00, NaN  
07-Apr-2018 06:00:00, NaN  
07-Apr-2018 07:00:00, NaN  
07-Apr-2018 08:00:00, NaN  
07-Apr-2018 09:00:00, NaN  
07-Apr-2018 10:00:00, NaN  
07-Apr-2018 11:00:00, NaN  
07-Apr-2018 12:00:00, NaN  
07-Apr-2018 13:00:00, NaN  
07-Apr-2018 14:00:00, NaN  
07-Apr-2018 15:00:00, NaN  
07-Apr-2018 16:00:00, NaN  
07-Apr-2018 17:00:00, NaN  
07-Apr-2018 18:00:00, NaN  
07-Apr-2018 19:00:00, NaN  
07-Apr-2018 20:00:00, NaN  
07-Apr-2018 21:00:00, NaN  
07-Apr-2018 22:00:00, NaN  
07-Apr-2018 23:00:00, NaN  
08-Apr-2018, NaN  
08-Apr-2018 01:00:00, NaN  
08-Apr-2018 02:00:00, NaN  
08-Apr-2018 03:00:00, NaN  
08-Apr-2018 04:00:00, NaN



08-Apr-2018 05:00:00, NaN  
08-Apr-2018 06:00:00, NaN  
08-Apr-2018 07:00:00, NaN  
08-Apr-2018 08:00:00, NaN  
08-Apr-2018 09:00:00, NaN  
08-Apr-2018 10:00:00, NaN  
08-Apr-2018 11:00:00, NaN  
08-Apr-2018 12:00:00, NaN  
08-Apr-2018 13:00:00, NaN  
08-Apr-2018 14:00:00, NaN  
08-Apr-2018 15:00:00, NaN  
08-Apr-2018 16:00:00, NaN  
08-Apr-2018 17:00:00, NaN  
08-Apr-2018 18:00:00, NaN  
08-Apr-2018 19:00:00, NaN  
08-Apr-2018 20:00:00, NaN  
08-Apr-2018 21:00:00, NaN  
08-Apr-2018 22:00:00, NaN  
08-Apr-2018 23:00:00, NaN  
09-Apr-2018, NaN  
09-Apr-2018 01:00:00, NaN  
09-Apr-2018 02:00:00, NaN  
09-Apr-2018 03:00:00, NaN  
09-Apr-2018 04:00:00, NaN  
09-Apr-2018 05:00:00, NaN  
09-Apr-2018 06:00:00, NaN  
09-Apr-2018 07:00:00, NaN  
09-Apr-2018 08:00:00, NaN  
09-Apr-2018 09:00:00, NaN  
09-Apr-2018 10:00:00, NaN  
09-Apr-2018 11:00:00, NaN  
09-Apr-2018 12:00:00, NaN  
09-Apr-2018 13:00:00, NaN  
09-Apr-2018 14:00:00, NaN  
09-Apr-2018 15:00:00, NaN  
09-Apr-2018 16:00:00, NaN  
09-Apr-2018 17:00:00, NaN  
09-Apr-2018 18:00:00, NaN  
09-Apr-2018 19:00:00, NaN  
09-Apr-2018 20:00:00, NaN  
09-Apr-2018 21:00:00, NaN  
09-Apr-2018 22:00:00, NaN  
09-Apr-2018 23:00:00, NaN  
10-Apr-2018, NaN  
10-Apr-2018 01:00:00, NaN  
10-Apr-2018 02:00:00, NaN  
10-Apr-2018 03:00:00, NaN  
10-Apr-2018 04:00:00, NaN  
10-Apr-2018 05:00:00, NaN  
10-Apr-2018 06:00:00, NaN  
10-Apr-2018 07:00:00, NaN  
10-Apr-2018 08:00:00, NaN  
10-Apr-2018 09:00:00, NaN  
10-Apr-2018 10:00:00, NaN  
10-Apr-2018 11:00:00, NaN  
10-Apr-2018 12:00:00, NaN  
10-Apr-2018 13:00:00, NaN  
10-Apr-2018 14:00:00, NaN  
10-Apr-2018 15:00:00, NaN  
10-Apr-2018 16:00:00, NaN  
10-Apr-2018 17:00:00, NaN  
10-Apr-2018 18:00:00, NaN  
10-Apr-2018 19:00:00, NaN  
10-Apr-2018 20:00:00, NaN

10-Apr-2018 21:00:00, NaN  
10-Apr-2018 22:00:00, NaN  
10-Apr-2018 23:00:00, NaN  
11-Apr-2018, NaN  
11-Apr-2018 01:00:00, NaN  
11-Apr-2018 02:00:00, NaN  
11-Apr-2018 03:00:00, NaN  
11-Apr-2018 04:00:00, NaN  
11-Apr-2018 05:00:00, NaN  
11-Apr-2018 06:00:00, NaN  
11-Apr-2018 07:00:00, NaN  
11-Apr-2018 08:00:00, NaN  
11-Apr-2018 09:00:00, NaN  
11-Apr-2018 10:00:00, NaN  
11-Apr-2018 11:00:00, NaN  
11-Apr-2018 12:00:00, NaN  
11-Apr-2018 13:00:00, NaN  
11-Apr-2018 14:00:00, NaN  
11-Apr-2018 15:00:00, NaN  
11-Apr-2018 16:00:00, NaN  
11-Apr-2018 17:00:00, NaN  
11-Apr-2018 18:00:00, NaN  
11-Apr-2018 19:00:00, NaN  
11-Apr-2018 20:00:00, NaN  
11-Apr-2018 21:00:00, NaN  
11-Apr-2018 22:00:00, NaN  
11-Apr-2018 23:00:00, NaN  
12-Apr-2018, NaN  
12-Apr-2018 01:00:00, NaN  
12-Apr-2018 02:00:00, NaN  
12-Apr-2018 03:00:00, NaN  
12-Apr-2018 04:00:00, NaN  
12-Apr-2018 05:00:00, NaN  
12-Apr-2018 06:00:00, NaN  
12-Apr-2018 07:00:00, NaN  
12-Apr-2018 08:00:00, NaN  
12-Apr-2018 09:00:00, NaN  
12-Apr-2018 10:00:00, NaN  
12-Apr-2018 11:00:00, NaN  
12-Apr-2018 12:00:00, NaN  
12-Apr-2018 13:00:00, NaN  
12-Apr-2018 14:00:00, NaN  
12-Apr-2018 15:00:00, NaN  
12-Apr-2018 16:00:00, NaN  
12-Apr-2018 17:00:00, NaN  
12-Apr-2018 18:00:00, NaN  
12-Apr-2018 19:00:00, NaN  
12-Apr-2018 20:00:00, NaN  
12-Apr-2018 21:00:00, NaN  
12-Apr-2018 22:00:00, NaN  
12-Apr-2018 23:00:00, NaN  
13-Apr-2018, NaN  
13-Apr-2018 01:00:00, NaN  
13-Apr-2018 02:00:00, NaN  
13-Apr-2018 03:00:00, NaN  
13-Apr-2018 04:00:00, NaN  
13-Apr-2018 05:00:00, NaN  
13-Apr-2018 06:00:00, NaN  
13-Apr-2018 07:00:00, NaN  
13-Apr-2018 08:00:00, NaN  
13-Apr-2018 09:00:00, NaN  
13-Apr-2018 10:00:00, NaN  
13-Apr-2018 11:00:00, NaN  
13-Apr-2018 12:00:00, NaN

13-Apr-2018 13:00:00, NaN  
13-Apr-2018 14:00:00, NaN  
13-Apr-2018 15:00:00, NaN  
13-Apr-2018 16:00:00, NaN  
13-Apr-2018 17:00:00, NaN  
13-Apr-2018 18:00:00, NaN  
13-Apr-2018 19:00:00, NaN  
13-Apr-2018 20:00:00, NaN  
13-Apr-2018 21:00:00, NaN  
13-Apr-2018 22:00:00, NaN  
13-Apr-2018 23:00:00, NaN  
14-Apr-2018, NaN  
14-Apr-2018 01:00:00, NaN  
14-Apr-2018 02:00:00, NaN  
14-Apr-2018 03:00:00, NaN  
14-Apr-2018 04:00:00, NaN  
14-Apr-2018 05:00:00, NaN  
14-Apr-2018 06:00:00, NaN  
14-Apr-2018 07:00:00, NaN  
14-Apr-2018 08:00:00, NaN  
14-Apr-2018 09:00:00, NaN  
14-Apr-2018 10:00:00, NaN  
14-Apr-2018 11:00:00, NaN  
14-Apr-2018 12:00:00, NaN  
14-Apr-2018 13:00:00, NaN  
14-Apr-2018 14:00:00, NaN  
14-Apr-2018 15:00:00, NaN  
14-Apr-2018 16:00:00, NaN  
14-Apr-2018 17:00:00, NaN  
14-Apr-2018 18:00:00, NaN  
14-Apr-2018 19:00:00, NaN  
14-Apr-2018 20:00:00, NaN  
14-Apr-2018 21:00:00, NaN  
14-Apr-2018 22:00:00, NaN  
14-Apr-2018 23:00:00, NaN  
15-Apr-2018, NaN  
15-Apr-2018 01:00:00, NaN  
15-Apr-2018 02:00:00, NaN  
15-Apr-2018 03:00:00, NaN  
15-Apr-2018 04:00:00, NaN  
15-Apr-2018 05:00:00, NaN  
15-Apr-2018 06:00:00, NaN  
15-Apr-2018 07:00:00, NaN  
15-Apr-2018 08:00:00, NaN  
15-Apr-2018 09:00:00, NaN  
15-Apr-2018 10:00:00, NaN  
15-Apr-2018 11:00:00, NaN  
15-Apr-2018 12:00:00, NaN  
15-Apr-2018 13:00:00, NaN  
15-Apr-2018 14:00:00, NaN  
15-Apr-2018 15:00:00, NaN  
15-Apr-2018 16:00:00, NaN  
15-Apr-2018 17:00:00, NaN  
15-Apr-2018 18:00:00, NaN  
15-Apr-2018 19:00:00, NaN  
15-Apr-2018 20:00:00, NaN  
15-Apr-2018 21:00:00, NaN  
15-Apr-2018 22:00:00, NaN  
15-Apr-2018 23:00:00, NaN  
16-Apr-2018, NaN  
16-Apr-2018 01:00:00, NaN  
16-Apr-2018 02:00:00, NaN  
16-Apr-2018 03:00:00, NaN  
16-Apr-2018 04:00:00, NaN

16-Apr-2018 05:00:00, NaN  
16-Apr-2018 06:00:00, NaN  
16-Apr-2018 07:00:00, NaN  
16-Apr-2018 08:00:00, NaN  
16-Apr-2018 09:00:00, NaN  
16-Apr-2018 10:00:00, NaN  
16-Apr-2018 11:00:00, NaN  
16-Apr-2018 12:00:00, NaN  
16-Apr-2018 13:00:00, NaN  
16-Apr-2018 14:00:00, NaN  
16-Apr-2018 15:00:00, NaN  
16-Apr-2018 16:00:00, NaN  
16-Apr-2018 17:00:00, NaN  
16-Apr-2018 18:00:00, NaN  
16-Apr-2018 19:00:00, NaN  
16-Apr-2018 20:00:00, NaN  
16-Apr-2018 21:00:00, NaN  
16-Apr-2018 22:00:00, NaN  
16-Apr-2018 23:00:00, NaN  
17-Apr-2018, NaN  
17-Apr-2018 01:00:00, NaN  
17-Apr-2018 02:00:00, NaN  
17-Apr-2018 03:00:00, NaN  
17-Apr-2018 04:00:00, NaN  
17-Apr-2018 05:00:00, NaN  
17-Apr-2018 06:00:00, NaN  
17-Apr-2018 07:00:00, NaN  
17-Apr-2018 08:00:00, NaN  
17-Apr-2018 09:00:00, NaN  
17-Apr-2018 10:00:00, NaN  
17-Apr-2018 11:00:00, NaN  
17-Apr-2018 12:00:00, NaN  
17-Apr-2018 13:00:00, NaN  
17-Apr-2018 14:00:00, NaN  
17-Apr-2018 15:00:00, NaN  
17-Apr-2018 16:00:00, NaN  
17-Apr-2018 17:00:00, NaN  
17-Apr-2018 18:00:00, NaN  
17-Apr-2018 19:00:00, NaN  
17-Apr-2018 20:00:00, NaN  
17-Apr-2018 21:00:00, NaN  
17-Apr-2018 22:00:00, NaN  
17-Apr-2018 23:00:00, NaN  
18-Apr-2018, NaN  
18-Apr-2018 01:00:00, NaN  
18-Apr-2018 02:00:00, NaN  
18-Apr-2018 03:00:00, NaN  
18-Apr-2018 04:00:00, NaN  
18-Apr-2018 05:00:00, NaN  
18-Apr-2018 06:00:00, NaN  
18-Apr-2018 07:00:00, NaN  
18-Apr-2018 08:00:00, NaN  
18-Apr-2018 09:00:00, NaN  
18-Apr-2018 10:00:00, NaN  
18-Apr-2018 11:00:00, NaN  
18-Apr-2018 12:00:00, NaN  
18-Apr-2018 13:00:00, NaN  
18-Apr-2018 14:00:00, NaN  
18-Apr-2018 15:00:00, NaN  
18-Apr-2018 16:00:00, NaN  
18-Apr-2018 17:00:00, NaN  
18-Apr-2018 18:00:00, NaN  
18-Apr-2018 19:00:00, NaN  
18-Apr-2018 20:00:00, NaN

18-Apr-2018 21:00:00, NaN  
18-Apr-2018 22:00:00, NaN  
18-Apr-2018 23:00:00, NaN  
19-Apr-2018, NaN  
19-Apr-2018 01:00:00, NaN  
19-Apr-2018 02:00:00, NaN  
19-Apr-2018 03:00:00, NaN  
19-Apr-2018 04:00:00, NaN  
19-Apr-2018 05:00:00, NaN  
19-Apr-2018 06:00:00, NaN  
19-Apr-2018 07:00:00, NaN  
19-Apr-2018 08:00:00, NaN  
19-Apr-2018 09:00:00, NaN  
19-Apr-2018 10:00:00, NaN  
19-Apr-2018 11:00:00, NaN  
19-Apr-2018 12:00:00, NaN  
19-Apr-2018 13:00:00, NaN  
19-Apr-2018 14:00:00, NaN  
19-Apr-2018 15:00:00, NaN  
19-Apr-2018 16:00:00, NaN  
19-Apr-2018 17:00:00, NaN  
19-Apr-2018 18:00:00, NaN  
19-Apr-2018 19:00:00, NaN  
19-Apr-2018 20:00:00, NaN  
19-Apr-2018 21:00:00, NaN  
19-Apr-2018 22:00:00, NaN  
19-Apr-2018 23:00:00, NaN  
20-Apr-2018, NaN  
20-Apr-2018 01:00:00, NaN  
20-Apr-2018 02:00:00, NaN  
20-Apr-2018 03:00:00, NaN  
20-Apr-2018 04:00:00, NaN  
20-Apr-2018 05:00:00, NaN  
20-Apr-2018 06:00:00, NaN  
20-Apr-2018 07:00:00, NaN  
20-Apr-2018 08:00:00, NaN  
20-Apr-2018 09:00:00, NaN  
20-Apr-2018 10:00:00, NaN  
20-Apr-2018 11:00:00, NaN  
20-Apr-2018 12:00:00, NaN  
20-Apr-2018 13:00:00, NaN  
20-Apr-2018 14:00:00, NaN  
20-Apr-2018 15:00:00, NaN  
20-Apr-2018 16:00:00, NaN  
20-Apr-2018 17:00:00, NaN  
20-Apr-2018 18:00:00, NaN  
20-Apr-2018 19:00:00, NaN  
20-Apr-2018 20:00:00, NaN  
20-Apr-2018 21:00:00, NaN  
20-Apr-2018 22:00:00, NaN  
20-Apr-2018 23:00:00, NaN  
21-Apr-2018, NaN  
21-Apr-2018 01:00:00, NaN  
21-Apr-2018 02:00:00, NaN  
21-Apr-2018 03:00:00, NaN  
21-Apr-2018 04:00:00, NaN  
21-Apr-2018 05:00:00, NaN  
21-Apr-2018 06:00:00, NaN  
21-Apr-2018 07:00:00, NaN  
21-Apr-2018 08:00:00, NaN  
21-Apr-2018 09:00:00, NaN  
21-Apr-2018 10:00:00, NaN  
21-Apr-2018 11:00:00, NaN  
21-Apr-2018 12:00:00, NaN

21-Apr-2018 13:00:00, NaN  
21-Apr-2018 14:00:00, NaN  
21-Apr-2018 15:00:00, NaN  
21-Apr-2018 16:00:00, NaN  
21-Apr-2018 17:00:00, NaN  
21-Apr-2018 18:00:00, NaN  
21-Apr-2018 19:00:00, NaN  
21-Apr-2018 20:00:00, NaN  
21-Apr-2018 21:00:00, NaN  
21-Apr-2018 22:00:00, NaN  
21-Apr-2018 23:00:00, NaN  
22-Apr-2018, NaN  
22-Apr-2018 01:00:00, NaN  
22-Apr-2018 02:00:00, NaN  
22-Apr-2018 03:00:00, NaN  
22-Apr-2018 04:00:00, NaN  
22-Apr-2018 05:00:00, NaN  
22-Apr-2018 06:00:00, NaN  
22-Apr-2018 07:00:00, NaN  
22-Apr-2018 08:00:00, NaN  
22-Apr-2018 09:00:00, NaN  
22-Apr-2018 10:00:00, NaN  
22-Apr-2018 11:00:00, NaN  
22-Apr-2018 12:00:00, NaN  
22-Apr-2018 13:00:00, NaN  
22-Apr-2018 14:00:00, NaN  
22-Apr-2018 15:00:00, NaN  
22-Apr-2018 16:00:00, NaN  
22-Apr-2018 17:00:00, NaN  
22-Apr-2018 18:00:00, NaN  
22-Apr-2018 19:00:00, NaN  
22-Apr-2018 20:00:00, NaN  
22-Apr-2018 21:00:00, NaN  
22-Apr-2018 22:00:00, NaN  
22-Apr-2018 23:00:00, NaN  
23-Apr-2018, NaN  
23-Apr-2018 01:00:00, NaN  
23-Apr-2018 02:00:00, NaN  
23-Apr-2018 03:00:00, NaN  
23-Apr-2018 04:00:00, NaN  
23-Apr-2018 05:00:00, NaN  
23-Apr-2018 06:00:00, NaN  
23-Apr-2018 07:00:00, NaN  
23-Apr-2018 08:00:00, NaN  
23-Apr-2018 09:00:00, NaN  
23-Apr-2018 10:00:00, NaN  
23-Apr-2018 11:00:00, NaN  
23-Apr-2018 12:00:00, NaN  
23-Apr-2018 13:00:00, NaN  
23-Apr-2018 14:00:00, NaN  
23-Apr-2018 15:00:00, NaN  
23-Apr-2018 16:00:00, NaN  
23-Apr-2018 17:00:00, NaN  
23-Apr-2018 18:00:00, NaN  
23-Apr-2018 19:00:00, NaN  
23-Apr-2018 20:00:00, NaN  
23-Apr-2018 21:00:00, NaN  
23-Apr-2018 22:00:00, NaN  
23-Apr-2018 23:00:00, NaN  
24-Apr-2018, NaN  
24-Apr-2018 01:00:00, NaN  
24-Apr-2018 02:00:00, NaN  
24-Apr-2018 03:00:00, NaN  
24-Apr-2018 04:00:00, NaN

24-Apr-2018 05:00:00, NaN  
24-Apr-2018 06:00:00, NaN  
24-Apr-2018 07:00:00, NaN  
24-Apr-2018 08:00:00, NaN  
24-Apr-2018 09:00:00, NaN  
24-Apr-2018 10:00:00, NaN  
24-Apr-2018 11:00:00, NaN  
24-Apr-2018 12:00:00, NaN  
24-Apr-2018 13:00:00, NaN  
24-Apr-2018 14:00:00, NaN  
24-Apr-2018 15:00:00, NaN  
24-Apr-2018 16:00:00, NaN  
24-Apr-2018 17:00:00, NaN  
24-Apr-2018 18:00:00, NaN  
24-Apr-2018 19:00:00, NaN  
24-Apr-2018 20:00:00, NaN  
24-Apr-2018 21:00:00, NaN  
24-Apr-2018 22:00:00, NaN  
24-Apr-2018 23:00:00, NaN  
25-Apr-2018, NaN  
25-Apr-2018 01:00:00, NaN  
25-Apr-2018 02:00:00, NaN  
25-Apr-2018 03:00:00, NaN  
25-Apr-2018 04:00:00, NaN  
25-Apr-2018 05:00:00, NaN  
25-Apr-2018 06:00:00, NaN  
25-Apr-2018 07:00:00, NaN  
25-Apr-2018 08:00:00, NaN  
25-Apr-2018 09:00:00, NaN  
25-Apr-2018 10:00:00, NaN  
25-Apr-2018 11:00:00, NaN  
25-Apr-2018 12:00:00, NaN  
25-Apr-2018 13:00:00, NaN  
25-Apr-2018 14:00:00, NaN  
25-Apr-2018 15:00:00, NaN  
25-Apr-2018 16:00:00, NaN  
25-Apr-2018 17:00:00, NaN  
25-Apr-2018 18:00:00, NaN  
25-Apr-2018 19:00:00, NaN  
25-Apr-2018 20:00:00, NaN  
25-Apr-2018 21:00:00, NaN  
25-Apr-2018 22:00:00, NaN  
25-Apr-2018 23:00:00, NaN  
26-Apr-2018, NaN  
26-Apr-2018 01:00:00, NaN  
26-Apr-2018 02:00:00, NaN  
26-Apr-2018 03:00:00, NaN  
26-Apr-2018 04:00:00, NaN  
26-Apr-2018 05:00:00, NaN  
26-Apr-2018 06:00:00, NaN  
26-Apr-2018 07:00:00, NaN  
26-Apr-2018 08:00:00, NaN  
26-Apr-2018 09:00:00, NaN  
26-Apr-2018 10:00:00, NaN  
26-Apr-2018 11:00:00, NaN  
26-Apr-2018 12:00:00, NaN  
26-Apr-2018 13:00:00, NaN  
26-Apr-2018 14:00:00, NaN  
26-Apr-2018 15:00:00, NaN  
26-Apr-2018 16:00:00, NaN  
26-Apr-2018 17:00:00, NaN  
26-Apr-2018 18:00:00, NaN  
26-Apr-2018 19:00:00, NaN  
26-Apr-2018 20:00:00, NaN

26-Apr-2018 21:00:00, NaN  
26-Apr-2018 22:00:00, NaN  
26-Apr-2018 23:00:00, NaN  
27-Apr-2018, NaN  
27-Apr-2018 01:00:00, NaN  
27-Apr-2018 02:00:00, NaN  
27-Apr-2018 03:00:00, NaN  
27-Apr-2018 04:00:00, NaN  
27-Apr-2018 05:00:00, NaN  
27-Apr-2018 06:00:00, NaN  
27-Apr-2018 07:00:00, NaN  
27-Apr-2018 08:00:00, NaN  
27-Apr-2018 09:00:00, NaN  
27-Apr-2018 10:00:00, NaN  
27-Apr-2018 11:00:00, NaN  
27-Apr-2018 12:00:00, NaN  
27-Apr-2018 13:00:00, NaN  
27-Apr-2018 14:00:00, NaN  
27-Apr-2018 15:00:00, NaN  
27-Apr-2018 16:00:00, NaN  
27-Apr-2018 17:00:00, NaN  
27-Apr-2018 18:00:00, NaN  
27-Apr-2018 19:00:00, NaN  
27-Apr-2018 20:00:00, NaN  
27-Apr-2018 21:00:00, NaN  
27-Apr-2018 22:00:00, NaN  
27-Apr-2018 23:00:00, NaN  
28-Apr-2018, NaN  
28-Apr-2018 01:00:00, NaN  
28-Apr-2018 02:00:00, NaN  
28-Apr-2018 03:00:00, NaN  
28-Apr-2018 04:00:00, NaN  
28-Apr-2018 05:00:00, NaN  
28-Apr-2018 06:00:00, NaN  
28-Apr-2018 07:00:00, NaN  
28-Apr-2018 08:00:00, NaN  
28-Apr-2018 09:00:00, NaN  
28-Apr-2018 10:00:00, NaN  
28-Apr-2018 11:00:00, NaN  
28-Apr-2018 12:00:00, NaN  
28-Apr-2018 13:00:00, NaN  
28-Apr-2018 14:00:00, NaN  
28-Apr-2018 15:00:00, NaN  
28-Apr-2018 16:00:00, NaN  
28-Apr-2018 17:00:00, NaN  
28-Apr-2018 18:00:00, NaN  
28-Apr-2018 19:00:00, NaN  
28-Apr-2018 20:00:00, NaN  
28-Apr-2018 21:00:00, NaN  
28-Apr-2018 22:00:00, NaN  
28-Apr-2018 23:00:00, NaN  
29-Apr-2018, NaN  
29-Apr-2018 01:00:00, NaN  
29-Apr-2018 02:00:00, NaN  
29-Apr-2018 03:00:00, NaN  
29-Apr-2018 04:00:00, NaN  
29-Apr-2018 05:00:00, NaN  
29-Apr-2018 06:00:00, NaN  
29-Apr-2018 07:00:00, NaN  
29-Apr-2018 08:00:00, NaN  
29-Apr-2018 09:00:00, NaN  
29-Apr-2018 10:00:00, NaN  
29-Apr-2018 11:00:00, NaN  
29-Apr-2018 12:00:00, NaN



29-Apr-2018 13:00:00, NaN  
29-Apr-2018 14:00:00, NaN  
29-Apr-2018 15:00:00, NaN  
29-Apr-2018 16:00:00, NaN  
29-Apr-2018 17:00:00, NaN  
29-Apr-2018 18:00:00, NaN  
29-Apr-2018 19:00:00, NaN  
29-Apr-2018 20:00:00, NaN  
29-Apr-2018 21:00:00, NaN  
29-Apr-2018 22:00:00, NaN  
29-Apr-2018 23:00:00, NaN  
30-Apr-2018, NaN  
30-Apr-2018 01:00:00, NaN  
30-Apr-2018 02:00:00, NaN  
30-Apr-2018 03:00:00, NaN  
30-Apr-2018 04:00:00, NaN  
30-Apr-2018 05:00:00, NaN  
30-Apr-2018 06:00:00, NaN  
30-Apr-2018 07:00:00, NaN  
30-Apr-2018 08:00:00, NaN  
30-Apr-2018 09:00:00, NaN  
30-Apr-2018 10:00:00, NaN  
30-Apr-2018 11:00:00, NaN  
30-Apr-2018 12:00:00, NaN  
30-Apr-2018 13:00:00, NaN  
30-Apr-2018 14:00:00, NaN  
30-Apr-2018 15:00:00, NaN  
30-Apr-2018 16:00:00, NaN  
30-Apr-2018 17:00:00, NaN  
30-Apr-2018 18:00:00, NaN  
30-Apr-2018 19:00:00, NaN  
30-Apr-2018 20:00:00, NaN  
30-Apr-2018 21:00:00, NaN  
30-Apr-2018 22:00:00, NaN  
30-Apr-2018 23:00:00, NaN  
01-May-2018, NaN  
01-May-2018 01:00:00, NaN  
01-May-2018 02:00:00, NaN  
01-May-2018 03:00:00, NaN  
01-May-2018 04:00:00, NaN  
01-May-2018 05:00:00, NaN  
01-May-2018 06:00:00, NaN  
01-May-2018 07:00:00, NaN  
01-May-2018 08:00:00, NaN  
01-May-2018 09:00:00, NaN  
01-May-2018 10:00:00, NaN  
01-May-2018 11:00:00, NaN  
01-May-2018 12:00:00, NaN  
01-May-2018 13:00:00, NaN  
01-May-2018 14:00:00, NaN  
01-May-2018 15:00:00, NaN  
01-May-2018 16:00:00, NaN  
01-May-2018 17:00:00, NaN  
01-May-2018 18:00:00, NaN  
01-May-2018 19:00:00, NaN  
01-May-2018 20:00:00, NaN  
01-May-2018 21:00:00, NaN  
01-May-2018 22:00:00, NaN  
01-May-2018 23:00:00, NaN  
02-May-2018, NaN  
02-May-2018 01:00:00, NaN  
02-May-2018 02:00:00, NaN  
02-May-2018 03:00:00, NaN  
02-May-2018 04:00:00, NaN

|              |           |     |
|--------------|-----------|-----|
| 02-May-2018  | 05:00:00, | NaN |
| 02-May-2018  | 06:00:00, | NaN |
| 02-May-2018  | 07:00:00, | NaN |
| 02-May-2018  | 08:00:00, | NaN |
| 02-May-2018  | 09:00:00, | NaN |
| 02-May-2018  | 10:00:00, | NaN |
| 02-May-2018  | 11:00:00, | NaN |
| 02-May-2018  | 12:00:00, | NaN |
| 02-May-2018  | 13:00:00, | NaN |
| 02-May-2018  | 14:00:00, | NaN |
| 02-May-2018  | 15:00:00, | NaN |
| 02-May-2018  | 16:00:00, | NaN |
| 02-May-2018  | 17:00:00, | NaN |
| 02-May-2018  | 18:00:00, | NaN |
| 02-May-2018  | 19:00:00, | NaN |
| 02-May-2018  | 20:00:00, | NaN |
| 02-May-2018  | 21:00:00, | NaN |
| 02-May-2018  | 22:00:00, | NaN |
| 02-May-2018  | 23:00:00, | NaN |
| 03-May-2018, | NaN       |     |
| 03-May-2018  | 01:00:00, | NaN |
| 03-May-2018  | 02:00:00, | NaN |
| 03-May-2018  | 03:00:00, | NaN |
| 03-May-2018  | 04:00:00, | NaN |
| 03-May-2018  | 05:00:00, | NaN |
| 03-May-2018  | 06:00:00, | NaN |
| 03-May-2018  | 07:00:00, | NaN |
| 03-May-2018  | 08:00:00, | NaN |
| 03-May-2018  | 09:00:00, | NaN |
| 03-May-2018  | 10:00:00, | NaN |
| 03-May-2018  | 11:00:00, | NaN |
| 03-May-2018  | 12:00:00, | NaN |
| 03-May-2018  | 13:00:00, | NaN |
| 03-May-2018  | 14:00:00, | NaN |
| 03-May-2018  | 15:00:00, | NaN |
| 03-May-2018  | 16:00:00, | NaN |
| 03-May-2018  | 17:00:00, | NaN |
| 03-May-2018  | 18:00:00, | NaN |
| 03-May-2018  | 19:00:00, | NaN |
| 03-May-2018  | 20:00:00, | NaN |
| 03-May-2018  | 21:00:00, | NaN |
| 03-May-2018  | 22:00:00, | NaN |
| 03-May-2018  | 23:00:00, | NaN |
| 04-May-2018, | NaN       |     |
| 04-May-2018  | 01:00:00, | NaN |
| 04-May-2018  | 02:00:00, | NaN |
| 04-May-2018  | 03:00:00, | NaN |
| 04-May-2018  | 04:00:00, | NaN |
| 04-May-2018  | 05:00:00, | NaN |
| 04-May-2018  | 06:00:00, | NaN |
| 04-May-2018  | 07:00:00, | NaN |
| 04-May-2018  | 08:00:00, | NaN |
| 04-May-2018  | 09:00:00, | NaN |
| 04-May-2018  | 10:00:00, | NaN |
| 04-May-2018  | 11:00:00, | NaN |
| 04-May-2018  | 12:00:00, | NaN |
| 04-May-2018  | 13:00:00, | NaN |
| 04-May-2018  | 14:00:00, | NaN |
| 04-May-2018  | 15:00:00, | NaN |
| 04-May-2018  | 16:00:00, | NaN |
| 04-May-2018  | 17:00:00, | NaN |
| 04-May-2018  | 18:00:00, | NaN |
| 04-May-2018  | 19:00:00, | NaN |
| 04-May-2018  | 20:00:00, | NaN |

04-May-2018 21:00:00, NaN  
04-May-2018 22:00:00, NaN  
04-May-2018 23:00:00, NaN  
05-May-2018, NaN  
05-May-2018 01:00:00, NaN  
05-May-2018 02:00:00, NaN  
05-May-2018 03:00:00, NaN  
05-May-2018 04:00:00, NaN  
05-May-2018 05:00:00, NaN  
05-May-2018 06:00:00, NaN  
05-May-2018 07:00:00, NaN  
05-May-2018 08:00:00, NaN  
05-May-2018 09:00:00, NaN  
05-May-2018 10:00:00, NaN  
05-May-2018 11:00:00, NaN  
05-May-2018 12:00:00, NaN  
05-May-2018 13:00:00, NaN  
05-May-2018 14:00:00, NaN  
05-May-2018 15:00:00, NaN  
05-May-2018 16:00:00, NaN  
05-May-2018 17:00:00, NaN  
05-May-2018 18:00:00, NaN  
05-May-2018 19:00:00, NaN  
05-May-2018 20:00:00, NaN  
05-May-2018 21:00:00, NaN  
05-May-2018 22:00:00, NaN  
05-May-2018 23:00:00, NaN  
06-May-2018, NaN  
06-May-2018 01:00:00, NaN  
06-May-2018 02:00:00, NaN  
06-May-2018 03:00:00, NaN  
06-May-2018 04:00:00, NaN  
06-May-2018 05:00:00, NaN  
06-May-2018 06:00:00, NaN  
06-May-2018 07:00:00, NaN  
06-May-2018 08:00:00, NaN  
06-May-2018 09:00:00, NaN  
06-May-2018 10:00:00, NaN  
06-May-2018 11:00:00, NaN  
06-May-2018 12:00:00, NaN  
06-May-2018 13:00:00, NaN  
06-May-2018 14:00:00, NaN  
06-May-2018 15:00:00, NaN  
06-May-2018 16:00:00, NaN  
06-May-2018 17:00:00, NaN  
06-May-2018 18:00:00, NaN  
06-May-2018 19:00:00, NaN  
06-May-2018 20:00:00, NaN  
06-May-2018 21:00:00, NaN  
06-May-2018 22:00:00, NaN  
06-May-2018 23:00:00, NaN  
07-May-2018, NaN  
07-May-2018 01:00:00, NaN  
07-May-2018 02:00:00, NaN  
07-May-2018 03:00:00, NaN  
07-May-2018 04:00:00, NaN  
07-May-2018 05:00:00, NaN  
07-May-2018 06:00:00, NaN  
07-May-2018 07:00:00, NaN  
07-May-2018 08:00:00, NaN  
07-May-2018 09:00:00, NaN  
07-May-2018 10:00:00, NaN  
07-May-2018 11:00:00, NaN  
07-May-2018 12:00:00, NaN

07-May-2018 13:00:00, NaN  
07-May-2018 14:00:00, NaN  
07-May-2018 15:00:00, NaN  
07-May-2018 16:00:00, NaN  
07-May-2018 17:00:00, NaN  
07-May-2018 18:00:00, NaN  
07-May-2018 19:00:00, NaN  
07-May-2018 20:00:00, NaN  
07-May-2018 21:00:00, NaN  
07-May-2018 22:00:00, NaN  
07-May-2018 23:00:00, NaN  
08-May-2018, NaN  
08-May-2018 01:00:00, NaN  
08-May-2018 02:00:00, NaN  
08-May-2018 03:00:00, NaN  
08-May-2018 04:00:00, NaN  
08-May-2018 05:00:00, NaN  
08-May-2018 06:00:00, NaN  
08-May-2018 07:00:00, NaN  
08-May-2018 08:00:00, NaN  
08-May-2018 09:00:00, NaN  
08-May-2018 10:00:00, NaN  
08-May-2018 11:00:00, NaN  
08-May-2018 12:00:00, NaN  
08-May-2018 13:00:00, NaN  
08-May-2018 14:00:00, NaN  
08-May-2018 15:00:00, NaN  
08-May-2018 16:00:00, NaN  
08-May-2018 17:00:00, NaN  
08-May-2018 18:00:00, NaN  
08-May-2018 19:00:00, NaN  
08-May-2018 20:00:00, NaN  
08-May-2018 21:00:00, NaN  
08-May-2018 22:00:00, NaN  
08-May-2018 23:00:00, NaN  
09-May-2018, NaN  
09-May-2018 01:00:00, NaN  
09-May-2018 02:00:00, NaN  
09-May-2018 03:00:00, NaN  
09-May-2018 04:00:00, NaN  
09-May-2018 05:00:00, NaN  
09-May-2018 06:00:00, NaN  
09-May-2018 07:00:00, NaN  
09-May-2018 08:00:00, NaN  
09-May-2018 09:00:00, NaN  
09-May-2018 10:00:00, NaN  
09-May-2018 11:00:00, NaN  
09-May-2018 12:00:00, NaN  
09-May-2018 13:00:00, NaN  
09-May-2018 14:00:00, NaN  
09-May-2018 15:00:00, NaN  
09-May-2018 16:00:00, NaN  
09-May-2018 17:00:00, NaN  
09-May-2018 18:00:00, NaN  
09-May-2018 19:00:00, NaN  
09-May-2018 20:00:00, NaN  
09-May-2018 21:00:00, NaN  
09-May-2018 22:00:00, NaN  
09-May-2018 23:00:00, NaN  
10-May-2018, NaN  
10-May-2018 01:00:00, NaN  
10-May-2018 02:00:00, NaN  
10-May-2018 03:00:00, NaN  
10-May-2018 04:00:00, NaN

10-May-2018 05:00:00, NaN  
10-May-2018 06:00:00, NaN  
10-May-2018 07:00:00, NaN  
10-May-2018 08:00:00, NaN  
10-May-2018 09:00:00, NaN  
10-May-2018 10:00:00, NaN  
10-May-2018 11:00:00, NaN  
10-May-2018 12:00:00, NaN  
10-May-2018 13:00:00, NaN  
10-May-2018 14:00:00, NaN  
10-May-2018 15:00:00, NaN  
10-May-2018 16:00:00, NaN  
10-May-2018 17:00:00, NaN  
10-May-2018 18:00:00, NaN  
10-May-2018 19:00:00, NaN  
10-May-2018 20:00:00, NaN  
10-May-2018 21:00:00, NaN  
10-May-2018 22:00:00, NaN  
10-May-2018 23:00:00, NaN  
11-May-2018, NaN  
11-May-2018 01:00:00, NaN  
11-May-2018 02:00:00, NaN  
11-May-2018 03:00:00, NaN  
11-May-2018 04:00:00, NaN  
11-May-2018 05:00:00, NaN  
11-May-2018 06:00:00, NaN  
11-May-2018 07:00:00, NaN  
11-May-2018 08:00:00, NaN  
11-May-2018 09:00:00, NaN  
11-May-2018 10:00:00, NaN  
11-May-2018 11:00:00, NaN  
11-May-2018 12:00:00, NaN  
11-May-2018 13:00:00, NaN  
11-May-2018 14:00:00, NaN  
11-May-2018 15:00:00, NaN  
11-May-2018 16:00:00, NaN  
11-May-2018 17:00:00, NaN  
11-May-2018 18:00:00, NaN  
11-May-2018 19:00:00, NaN  
11-May-2018 20:00:00, NaN  
11-May-2018 21:00:00, NaN  
11-May-2018 22:00:00, NaN  
11-May-2018 23:00:00, NaN  
12-May-2018, NaN  
12-May-2018 01:00:00, NaN  
12-May-2018 02:00:00, NaN  
12-May-2018 03:00:00, NaN  
12-May-2018 04:00:00, NaN  
12-May-2018 05:00:00, NaN  
12-May-2018 06:00:00, NaN  
12-May-2018 07:00:00, NaN  
12-May-2018 08:00:00, NaN  
12-May-2018 09:00:00, NaN  
12-May-2018 10:00:00, NaN  
12-May-2018 11:00:00, NaN  
12-May-2018 12:00:00, NaN  
12-May-2018 13:00:00, NaN  
12-May-2018 14:00:00, NaN  
12-May-2018 15:00:00, NaN  
12-May-2018 16:00:00, NaN  
12-May-2018 17:00:00, NaN  
12-May-2018 18:00:00, NaN  
12-May-2018 19:00:00, NaN  
12-May-2018 20:00:00, NaN

12-May-2018 21:00:00, NaN  
12-May-2018 22:00:00, NaN  
12-May-2018 23:00:00, NaN  
13-May-2018, NaN  
13-May-2018 01:00:00, NaN  
13-May-2018 02:00:00, NaN  
13-May-2018 03:00:00, NaN  
13-May-2018 04:00:00, NaN  
13-May-2018 05:00:00, NaN  
13-May-2018 06:00:00, NaN  
13-May-2018 07:00:00, NaN  
13-May-2018 08:00:00, NaN  
13-May-2018 09:00:00, NaN  
13-May-2018 10:00:00, NaN  
13-May-2018 11:00:00, NaN  
13-May-2018 12:00:00, NaN  
13-May-2018 13:00:00, NaN  
13-May-2018 14:00:00, NaN  
13-May-2018 15:00:00, NaN  
13-May-2018 16:00:00, NaN  
13-May-2018 17:00:00, NaN  
13-May-2018 18:00:00, NaN  
13-May-2018 19:00:00, NaN  
13-May-2018 20:00:00, NaN  
13-May-2018 21:00:00, NaN  
13-May-2018 22:00:00, NaN  
13-May-2018 23:00:00, NaN  
14-May-2018, NaN  
14-May-2018 01:00:00, NaN  
14-May-2018 02:00:00, NaN  
14-May-2018 03:00:00, NaN  
14-May-2018 04:00:00, NaN  
14-May-2018 05:00:00, NaN  
14-May-2018 06:00:00, NaN  
14-May-2018 07:00:00, NaN  
14-May-2018 08:00:00, NaN  
14-May-2018 09:00:00, NaN  
14-May-2018 10:00:00, NaN  
14-May-2018 11:00:00, NaN  
14-May-2018 12:00:00, NaN  
14-May-2018 13:00:00, NaN  
14-May-2018 14:00:00, NaN  
14-May-2018 15:00:00, NaN  
14-May-2018 16:00:00, NaN  
14-May-2018 17:00:00, NaN  
14-May-2018 18:00:00, NaN  
14-May-2018 19:00:00, NaN  
14-May-2018 20:00:00, NaN  
14-May-2018 21:00:00, NaN  
14-May-2018 22:00:00, NaN  
14-May-2018 23:00:00, NaN  
15-May-2018, NaN  
15-May-2018 01:00:00, NaN  
15-May-2018 02:00:00, NaN  
15-May-2018 03:00:00, NaN  
15-May-2018 04:00:00, NaN  
15-May-2018 05:00:00, NaN  
15-May-2018 06:00:00, NaN  
15-May-2018 07:00:00, NaN  
15-May-2018 08:00:00, NaN  
15-May-2018 09:00:00, NaN  
15-May-2018 10:00:00, NaN  
15-May-2018 11:00:00, NaN  
15-May-2018 12:00:00, NaN

15-May-2018 13:00:00, NaN  
15-May-2018 14:00:00, NaN  
15-May-2018 15:00:00, NaN  
15-May-2018 16:00:00, NaN  
15-May-2018 17:00:00, NaN  
15-May-2018 18:00:00, NaN  
15-May-2018 19:00:00, NaN  
15-May-2018 20:00:00, NaN  
15-May-2018 21:00:00, NaN  
15-May-2018 22:00:00, NaN  
15-May-2018 23:00:00, NaN  
16-May-2018, NaN  
16-May-2018 01:00:00, NaN  
16-May-2018 02:00:00, NaN  
16-May-2018 03:00:00, NaN  
16-May-2018 04:00:00, NaN  
16-May-2018 05:00:00, NaN  
16-May-2018 06:00:00, NaN  
16-May-2018 07:00:00, NaN  
16-May-2018 08:00:00, NaN  
16-May-2018 09:00:00, NaN  
16-May-2018 10:00:00, NaN  
16-May-2018 11:00:00, NaN  
16-May-2018 12:00:00, NaN  
16-May-2018 13:00:00, NaN  
16-May-2018 14:00:00, NaN  
16-May-2018 15:00:00, NaN  
16-May-2018 16:00:00, NaN  
16-May-2018 17:00:00, NaN  
16-May-2018 18:00:00, NaN  
16-May-2018 19:00:00, NaN  
16-May-2018 20:00:00, NaN  
16-May-2018 21:00:00, NaN  
16-May-2018 22:00:00, NaN  
16-May-2018 23:00:00, NaN  
17-May-2018, NaN  
17-May-2018 01:00:00, NaN  
17-May-2018 02:00:00, NaN  
17-May-2018 03:00:00, NaN  
17-May-2018 04:00:00, NaN  
17-May-2018 05:00:00, NaN  
17-May-2018 06:00:00, NaN  
17-May-2018 07:00:00, NaN  
17-May-2018 08:00:00, NaN  
17-May-2018 09:00:00, NaN  
17-May-2018 10:00:00, NaN  
17-May-2018 11:00:00, NaN  
17-May-2018 12:00:00, NaN  
17-May-2018 13:00:00, NaN  
17-May-2018 14:00:00, NaN  
17-May-2018 15:00:00, NaN  
17-May-2018 16:00:00, NaN  
17-May-2018 17:00:00, NaN  
17-May-2018 18:00:00, NaN  
17-May-2018 19:00:00, NaN  
17-May-2018 20:00:00, NaN  
17-May-2018 21:00:00, NaN  
17-May-2018 22:00:00, NaN  
17-May-2018 23:00:00, NaN  
18-May-2018, NaN  
18-May-2018 01:00:00, NaN  
18-May-2018 02:00:00, NaN  
18-May-2018 03:00:00, NaN  
18-May-2018 04:00:00, NaN

18-May-2018 05:00:00, NaN  
18-May-2018 06:00:00, NaN  
18-May-2018 07:00:00, NaN  
18-May-2018 08:00:00, NaN  
18-May-2018 09:00:00, NaN  
18-May-2018 10:00:00, NaN  
18-May-2018 11:00:00, NaN  
18-May-2018 12:00:00, NaN  
18-May-2018 13:00:00, NaN  
18-May-2018 14:00:00, NaN  
18-May-2018 15:00:00, NaN  
18-May-2018 16:00:00, NaN  
18-May-2018 17:00:00, NaN  
18-May-2018 18:00:00, NaN  
18-May-2018 19:00:00, NaN  
18-May-2018 20:00:00, NaN  
18-May-2018 21:00:00, NaN  
18-May-2018 22:00:00, NaN  
18-May-2018 23:00:00, NaN  
19-May-2018, NaN  
19-May-2018 01:00:00, NaN  
19-May-2018 02:00:00, NaN  
19-May-2018 03:00:00, NaN  
19-May-2018 04:00:00, NaN  
19-May-2018 05:00:00, NaN  
19-May-2018 06:00:00, NaN  
19-May-2018 07:00:00, NaN  
19-May-2018 08:00:00, NaN  
19-May-2018 09:00:00, NaN  
19-May-2018 10:00:00, NaN  
19-May-2018 11:00:00, NaN  
19-May-2018 12:00:00, NaN  
19-May-2018 13:00:00, NaN  
19-May-2018 14:00:00, NaN  
19-May-2018 15:00:00, NaN  
19-May-2018 16:00:00, NaN  
19-May-2018 17:00:00, NaN  
19-May-2018 18:00:00, NaN  
19-May-2018 19:00:00, NaN  
19-May-2018 20:00:00, NaN  
19-May-2018 21:00:00, NaN  
19-May-2018 22:00:00, NaN  
19-May-2018 23:00:00, NaN  
20-May-2018, NaN  
20-May-2018 01:00:00, NaN  
20-May-2018 02:00:00, NaN  
20-May-2018 03:00:00, NaN  
20-May-2018 04:00:00, NaN  
20-May-2018 05:00:00, NaN  
20-May-2018 06:00:00, NaN  
20-May-2018 07:00:00, NaN  
20-May-2018 08:00:00, NaN  
20-May-2018 09:00:00, NaN  
20-May-2018 10:00:00, NaN  
20-May-2018 11:00:00, NaN  
20-May-2018 12:00:00, NaN  
20-May-2018 13:00:00, NaN  
20-May-2018 14:00:00, NaN  
20-May-2018 15:00:00, NaN  
20-May-2018 16:00:00, NaN  
20-May-2018 17:00:00, NaN  
20-May-2018 18:00:00, NaN  
20-May-2018 19:00:00, NaN  
20-May-2018 20:00:00, NaN



20-May-2018 21:00:00, NaN  
20-May-2018 22:00:00, NaN  
20-May-2018 23:00:00, NaN  
21-May-2018, NaN  
21-May-2018 01:00:00, NaN  
21-May-2018 02:00:00, NaN  
21-May-2018 03:00:00, NaN  
21-May-2018 04:00:00, NaN  
21-May-2018 05:00:00, NaN  
21-May-2018 06:00:00, NaN  
21-May-2018 07:00:00, NaN  
21-May-2018 08:00:00, NaN  
21-May-2018 09:00:00, NaN  
21-May-2018 10:00:00, NaN  
21-May-2018 11:00:00, NaN  
21-May-2018 12:00:00, NaN  
21-May-2018 13:00:00, NaN  
21-May-2018 14:00:00, NaN  
21-May-2018 15:00:00, NaN  
21-May-2018 16:00:00, NaN  
21-May-2018 17:00:00, NaN  
21-May-2018 18:00:00, NaN  
21-May-2018 19:00:00, NaN  
21-May-2018 20:00:00, NaN  
21-May-2018 21:00:00, NaN  
21-May-2018 22:00:00, NaN  
21-May-2018 23:00:00, NaN  
22-May-2018, NaN  
22-May-2018 01:00:00, NaN  
22-May-2018 02:00:00, NaN  
22-May-2018 03:00:00, NaN  
22-May-2018 04:00:00, NaN  
22-May-2018 05:00:00, NaN  
22-May-2018 06:00:00, NaN  
22-May-2018 07:00:00, NaN  
22-May-2018 08:00:00, NaN  
22-May-2018 09:00:00, NaN  
22-May-2018 10:00:00, NaN  
22-May-2018 11:00:00, NaN  
22-May-2018 12:00:00, NaN  
22-May-2018 13:00:00, NaN  
22-May-2018 14:00:00, NaN  
22-May-2018 15:00:00, NaN  
22-May-2018 16:00:00, NaN  
22-May-2018 17:00:00, NaN  
22-May-2018 18:00:00, NaN  
22-May-2018 19:00:00, NaN  
22-May-2018 20:00:00, NaN  
22-May-2018 21:00:00, NaN  
22-May-2018 22:00:00, NaN  
22-May-2018 23:00:00, NaN  
23-May-2018, NaN  
23-May-2018 01:00:00, NaN  
23-May-2018 02:00:00, NaN  
23-May-2018 03:00:00, NaN  
23-May-2018 04:00:00, NaN  
23-May-2018 05:00:00, NaN  
23-May-2018 06:00:00, NaN  
23-May-2018 07:00:00, NaN  
23-May-2018 08:00:00, NaN  
23-May-2018 09:00:00, NaN  
23-May-2018 10:00:00, NaN  
23-May-2018 11:00:00, NaN  
23-May-2018 12:00:00, NaN

23-May-2018 13:00:00, NaN  
23-May-2018 14:00:00, NaN  
23-May-2018 15:00:00, NaN  
23-May-2018 16:00:00, NaN  
23-May-2018 17:00:00, NaN  
23-May-2018 18:00:00, NaN  
23-May-2018 19:00:00, NaN  
23-May-2018 20:00:00, NaN  
23-May-2018 21:00:00, NaN  
23-May-2018 22:00:00, NaN  
23-May-2018 23:00:00, NaN  
24-May-2018, NaN  
24-May-2018 01:00:00, NaN  
24-May-2018 02:00:00, NaN  
24-May-2018 03:00:00, NaN  
24-May-2018 04:00:00, NaN  
24-May-2018 05:00:00, NaN  
24-May-2018 06:00:00, NaN  
24-May-2018 07:00:00, NaN  
24-May-2018 08:00:00, NaN  
24-May-2018 09:00:00, NaN  
24-May-2018 10:00:00, NaN  
24-May-2018 11:00:00, NaN  
24-May-2018 12:00:00, NaN  
24-May-2018 13:00:00, NaN  
24-May-2018 14:00:00, NaN  
24-May-2018 15:00:00, NaN  
24-May-2018 16:00:00, NaN  
24-May-2018 17:00:00, NaN  
24-May-2018 18:00:00, NaN  
24-May-2018 19:00:00, NaN  
24-May-2018 20:00:00, NaN  
24-May-2018 21:00:00, NaN  
24-May-2018 22:00:00, NaN  
24-May-2018 23:00:00, NaN  
25-May-2018, NaN  
25-May-2018 01:00:00, NaN  
25-May-2018 02:00:00, NaN  
25-May-2018 03:00:00, NaN  
25-May-2018 04:00:00, NaN  
25-May-2018 05:00:00, NaN  
25-May-2018 06:00:00, NaN  
25-May-2018 07:00:00, NaN  
25-May-2018 08:00:00, NaN  
25-May-2018 09:00:00, NaN  
25-May-2018 10:00:00, NaN  
25-May-2018 11:00:00, NaN  
25-May-2018 12:00:00, NaN  
25-May-2018 13:00:00, NaN  
25-May-2018 14:00:00, NaN  
25-May-2018 15:00:00, NaN  
25-May-2018 16:00:00, NaN  
25-May-2018 17:00:00, NaN  
25-May-2018 18:00:00, NaN  
25-May-2018 19:00:00, NaN  
25-May-2018 20:00:00, NaN  
25-May-2018 21:00:00, NaN  
25-May-2018 22:00:00, NaN  
25-May-2018 23:00:00, NaN  
26-May-2018, NaN  
26-May-2018 01:00:00, NaN  
26-May-2018 02:00:00, NaN  
26-May-2018 03:00:00, NaN  
26-May-2018 04:00:00, NaN

26-May-2018 05:00:00, NaN  
26-May-2018 06:00:00, NaN  
26-May-2018 07:00:00, NaN  
26-May-2018 08:00:00, NaN  
26-May-2018 09:00:00, NaN  
26-May-2018 10:00:00, NaN  
26-May-2018 11:00:00, NaN  
26-May-2018 12:00:00, NaN  
26-May-2018 13:00:00, NaN  
26-May-2018 14:00:00, NaN  
26-May-2018 15:00:00, NaN  
26-May-2018 16:00:00, NaN  
26-May-2018 17:00:00, NaN  
26-May-2018 18:00:00, NaN  
26-May-2018 19:00:00, NaN  
26-May-2018 20:00:00, NaN  
26-May-2018 21:00:00, NaN  
26-May-2018 22:00:00, NaN  
26-May-2018 23:00:00, NaN  
27-May-2018, NaN  
27-May-2018 01:00:00, NaN  
27-May-2018 02:00:00, NaN  
27-May-2018 03:00:00, NaN  
27-May-2018 04:00:00, NaN  
27-May-2018 05:00:00, NaN  
27-May-2018 06:00:00, NaN  
27-May-2018 07:00:00, NaN  
27-May-2018 08:00:00, NaN  
27-May-2018 09:00:00, NaN  
27-May-2018 10:00:00, NaN  
27-May-2018 11:00:00, NaN  
27-May-2018 12:00:00, NaN  
27-May-2018 13:00:00, NaN  
27-May-2018 14:00:00, NaN  
27-May-2018 15:00:00, NaN  
27-May-2018 16:00:00, NaN  
27-May-2018 17:00:00, NaN  
27-May-2018 18:00:00, NaN  
27-May-2018 19:00:00, NaN  
27-May-2018 20:00:00, NaN  
27-May-2018 21:00:00, NaN  
27-May-2018 22:00:00, NaN  
27-May-2018 23:00:00, NaN  
28-May-2018, NaN  
28-May-2018 01:00:00, NaN  
28-May-2018 02:00:00, NaN  
28-May-2018 03:00:00, NaN  
28-May-2018 04:00:00, NaN  
28-May-2018 05:00:00, NaN  
28-May-2018 06:00:00, NaN  
28-May-2018 07:00:00, NaN  
28-May-2018 08:00:00, NaN  
28-May-2018 09:00:00, NaN  
28-May-2018 10:00:00, NaN  
28-May-2018 11:00:00, NaN  
28-May-2018 12:00:00, NaN  
28-May-2018 13:00:00, NaN  
28-May-2018 14:00:00, NaN  
28-May-2018 15:00:00, NaN  
28-May-2018 16:00:00, NaN  
28-May-2018 17:00:00, NaN  
28-May-2018 18:00:00, NaN  
28-May-2018 19:00:00, NaN  
28-May-2018 20:00:00, NaN

28-May-2018 21:00:00, NaN  
28-May-2018 22:00:00, NaN  
28-May-2018 23:00:00, NaN  
29-May-2018, NaN  
29-May-2018 01:00:00, NaN  
29-May-2018 02:00:00, NaN  
29-May-2018 03:00:00, NaN  
29-May-2018 04:00:00, NaN  
29-May-2018 05:00:00, NaN  
29-May-2018 06:00:00, NaN  
29-May-2018 07:00:00, NaN  
29-May-2018 08:00:00, NaN  
29-May-2018 09:00:00, NaN  
29-May-2018 10:00:00, NaN  
29-May-2018 11:00:00, NaN  
29-May-2018 12:00:00, NaN  
29-May-2018 13:00:00, NaN  
29-May-2018 14:00:00, NaN  
29-May-2018 15:00:00, NaN  
29-May-2018 16:00:00, NaN  
29-May-2018 17:00:00, NaN  
29-May-2018 18:00:00, NaN  
29-May-2018 19:00:00, NaN  
29-May-2018 20:00:00, NaN  
29-May-2018 21:00:00, NaN  
29-May-2018 22:00:00, NaN  
29-May-2018 23:00:00, NaN  
30-May-2018, NaN  
30-May-2018 01:00:00, NaN  
30-May-2018 02:00:00, NaN  
30-May-2018 03:00:00, NaN  
30-May-2018 04:00:00, NaN  
30-May-2018 05:00:00, NaN  
30-May-2018 06:00:00, NaN  
30-May-2018 07:00:00, NaN  
30-May-2018 08:00:00, NaN  
30-May-2018 09:00:00, NaN  
30-May-2018 10:00:00, NaN  
30-May-2018 11:00:00, NaN  
30-May-2018 12:00:00, NaN  
30-May-2018 13:00:00, NaN  
30-May-2018 14:00:00, NaN  
30-May-2018 15:00:00, NaN  
30-May-2018 16:00:00, NaN  
30-May-2018 17:00:00, NaN  
30-May-2018 18:00:00, NaN  
30-May-2018 19:00:00, NaN  
30-May-2018 20:00:00, NaN  
30-May-2018 21:00:00, NaN  
30-May-2018 22:00:00, NaN  
30-May-2018 23:00:00, NaN  
31-May-2018, NaN  
31-May-2018 01:00:00, NaN  
31-May-2018 02:00:00, NaN  
31-May-2018 03:00:00, NaN  
31-May-2018 04:00:00, NaN  
31-May-2018 05:00:00, NaN  
31-May-2018 06:00:00, NaN  
31-May-2018 07:00:00, NaN  
31-May-2018 08:00:00, NaN  
31-May-2018 09:00:00, NaN  
31-May-2018 10:00:00, NaN  
31-May-2018 11:00:00, NaN  
31-May-2018 12:00:00, NaN

31-May-2018 13:00:00, NaN  
31-May-2018 14:00:00, NaN  
31-May-2018 15:00:00, NaN  
31-May-2018 16:00:00, NaN  
31-May-2018 17:00:00, NaN  
31-May-2018 18:00:00, NaN  
31-May-2018 19:00:00, NaN  
31-May-2018 20:00:00, NaN  
31-May-2018 21:00:00, NaN  
31-May-2018 22:00:00, NaN  
31-May-2018 23:00:00, NaN  
01-Jun-2018, 5.13e-01  
01-Jun-2018 01:00:00, 5.13e-01  
01-Jun-2018 02:00:00, 5.13e-01  
01-Jun-2018 03:00:00, 5.14e-01  
01-Jun-2018 04:00:00, 5.14e-01  
01-Jun-2018 05:00:00, 5.14e-01  
01-Jun-2018 06:00:00, 5.14e-01  
01-Jun-2018 07:00:00, 5.14e-01  
01-Jun-2018 08:00:00, 5.14e-01  
01-Jun-2018 09:00:00, 5.14e-01  
01-Jun-2018 10:00:00, 5.14e-01  
01-Jun-2018 11:00:00, 5.14e-01  
01-Jun-2018 12:00:00, 5.14e-01  
01-Jun-2018 13:00:00, 5.14e-01  
01-Jun-2018 14:00:00, 5.14e-01  
01-Jun-2018 15:00:00, 5.14e-01  
01-Jun-2018 16:00:00, 5.14e-01  
01-Jun-2018 17:00:00, 5.14e-01  
01-Jun-2018 18:00:00, 5.14e-01  
01-Jun-2018 19:00:00, 5.14e-01  
01-Jun-2018 20:00:00, 5.14e-01  
01-Jun-2018 21:00:00, 5.14e-01  
01-Jun-2018 22:00:00, 5.13e-01  
01-Jun-2018 23:00:00, 5.14e-01  
02-Jun-2018, 5.13e-01  
02-Jun-2018 01:00:00, 5.13e-01  
02-Jun-2018 02:00:00, 5.13e-01  
02-Jun-2018 03:00:00, 5.13e-01  
02-Jun-2018 04:00:00, 5.14e-01  
02-Jun-2018 05:00:00, 5.14e-01  
02-Jun-2018 06:00:00, 5.14e-01  
02-Jun-2018 07:00:00, 5.14e-01  
02-Jun-2018 08:00:00, 5.14e-01  
02-Jun-2018 09:00:00, 5.14e-01  
02-Jun-2018 10:00:00, 5.14e-01  
02-Jun-2018 11:00:00, 5.14e-01  
02-Jun-2018 12:00:00, 5.14e-01  
02-Jun-2018 13:00:00, 5.14e-01  
02-Jun-2018 14:00:00, 5.14e-01  
02-Jun-2018 15:00:00, 5.14e-01  
02-Jun-2018 16:00:00, 5.14e-01  
02-Jun-2018 17:00:00, 5.14e-01  
02-Jun-2018 18:00:00, 5.14e-01  
02-Jun-2018 19:00:00, 5.14e-01  
02-Jun-2018 20:00:00, 5.14e-01  
02-Jun-2018 21:00:00, 5.14e-01  
02-Jun-2018 22:00:00, 5.14e-01  
02-Jun-2018 23:00:00, 5.14e-01  
03-Jun-2018, 5.14e-01  
03-Jun-2018 01:00:00, 5.14e-01  
03-Jun-2018 02:00:00, 5.14e-01  
03-Jun-2018 03:00:00, 5.14e-01  
03-Jun-2018 04:00:00, 5.14e-01

03-Jun-2018 05:00:00, 5.14e-01  
03-Jun-2018 06:00:00, 5.14e-01  
03-Jun-2018 07:00:00, 5.14e-01  
03-Jun-2018 08:00:00, 5.14e-01  
03-Jun-2018 09:00:00, 5.14e-01  
03-Jun-2018 10:00:00, 5.14e-01  
03-Jun-2018 11:00:00, 5.14e-01  
03-Jun-2018 12:00:00, 5.15e-01  
03-Jun-2018 13:00:00, 5.14e-01  
03-Jun-2018 14:00:00, 5.14e-01  
03-Jun-2018 15:00:00, 5.15e-01  
03-Jun-2018 16:00:00, 5.15e-01  
03-Jun-2018 17:00:00, 5.14e-01  
03-Jun-2018 18:00:00, 5.14e-01  
03-Jun-2018 19:00:00, 5.14e-01  
03-Jun-2018 20:00:00, 5.14e-01  
03-Jun-2018 21:00:00, 5.14e-01  
03-Jun-2018 22:00:00, 5.14e-01  
03-Jun-2018 23:00:00, 5.14e-01  
04-Jun-2018, 5.14e-01  
04-Jun-2018 01:00:00, 5.14e-01  
04-Jun-2018 02:00:00, 5.14e-01  
04-Jun-2018 03:00:00, 5.14e-01  
04-Jun-2018 04:00:00, 5.15e-01  
04-Jun-2018 05:00:00, 5.15e-01  
04-Jun-2018 06:00:00, 5.15e-01  
04-Jun-2018 07:00:00, 5.15e-01  
04-Jun-2018 08:00:00, 5.15e-01  
04-Jun-2018 09:00:00, 5.15e-01  
04-Jun-2018 10:00:00, 5.15e-01  
04-Jun-2018 11:00:00, 5.15e-01  
04-Jun-2018 12:00:00, 5.15e-01  
04-Jun-2018 13:00:00, 5.15e-01  
04-Jun-2018 14:00:00, 5.15e-01  
04-Jun-2018 15:00:00, 5.15e-01  
04-Jun-2018 16:00:00, 5.15e-01  
04-Jun-2018 17:00:00, 5.15e-01  
04-Jun-2018 18:00:00, 5.15e-01  
04-Jun-2018 19:00:00, 5.15e-01  
04-Jun-2018 20:00:00, 5.14e-01  
04-Jun-2018 21:00:00, 5.14e-01  
04-Jun-2018 22:00:00, 5.14e-01  
04-Jun-2018 23:00:00, 5.14e-01  
05-Jun-2018, 5.14e-01  
05-Jun-2018 01:00:00, 5.14e-01  
05-Jun-2018 02:00:00, 5.14e-01  
05-Jun-2018 03:00:00, 5.15e-01  
05-Jun-2018 04:00:00, 5.15e-01  
05-Jun-2018 05:00:00, 5.15e-01  
05-Jun-2018 06:00:00, 5.15e-01  
05-Jun-2018 07:00:00, 5.15e-01  
05-Jun-2018 08:00:00, 5.15e-01  
05-Jun-2018 09:00:00, 5.15e-01  
05-Jun-2018 10:00:00, 5.15e-01  
05-Jun-2018 11:00:00, 5.15e-01  
05-Jun-2018 12:00:00, 5.15e-01  
05-Jun-2018 13:00:00, 5.15e-01  
05-Jun-2018 14:00:00, 5.15e-01  
05-Jun-2018 15:00:00, 5.15e-01  
05-Jun-2018 16:00:00, 5.15e-01  
05-Jun-2018 17:00:00, 5.15e-01  
05-Jun-2018 18:00:00, 5.15e-01  
05-Jun-2018 19:00:00, 5.15e-01  
05-Jun-2018 20:00:00, 5.14e-01

05-Jun-2018 21:00:00, 5.14e-01  
05-Jun-2018 22:00:00, 5.14e-01  
05-Jun-2018 23:00:00, 5.14e-01  
06-Jun-2018, 5.14e-01  
06-Jun-2018 01:00:00, 5.14e-01  
06-Jun-2018 02:00:00, 5.14e-01  
06-Jun-2018 03:00:00, 5.14e-01  
06-Jun-2018 04:00:00, 5.14e-01  
06-Jun-2018 05:00:00, 5.14e-01  
06-Jun-2018 06:00:00, 5.14e-01  
06-Jun-2018 07:00:00, 5.14e-01  
06-Jun-2018 08:00:00, 5.14e-01  
06-Jun-2018 09:00:00, 5.14e-01  
06-Jun-2018 10:00:00, 5.14e-01  
06-Jun-2018 11:00:00, 5.15e-01  
06-Jun-2018 12:00:00, 5.15e-01  
06-Jun-2018 13:00:00, 5.15e-01  
06-Jun-2018 14:00:00, 5.14e-01  
06-Jun-2018 15:00:00, 5.14e-01  
06-Jun-2018 16:00:00, 5.14e-01  
06-Jun-2018 17:00:00, 5.13e-01  
06-Jun-2018 18:00:00, 5.13e-01  
06-Jun-2018 19:00:00, 5.12e-01  
06-Jun-2018 20:00:00, 5.12e-01  
06-Jun-2018 21:00:00, 5.12e-01  
06-Jun-2018 22:00:00, 5.11e-01  
06-Jun-2018 23:00:00, 5.12e-01  
07-Jun-2018, 5.11e-01  
07-Jun-2018 01:00:00, 5.11e-01  
07-Jun-2018 02:00:00, 5.12e-01  
07-Jun-2018 03:00:00, 5.12e-01  
07-Jun-2018 04:00:00, 5.11e-01  
07-Jun-2018 05:00:00, 5.11e-01  
07-Jun-2018 06:00:00, 5.11e-01  
07-Jun-2018 07:00:00, 5.11e-01  
07-Jun-2018 08:00:00, 5.11e-01  
07-Jun-2018 09:00:00, 5.12e-01  
07-Jun-2018 10:00:00, 5.12e-01  
07-Jun-2018 11:00:00, 5.12e-01  
07-Jun-2018 12:00:00, 5.12e-01  
07-Jun-2018 13:00:00, 5.12e-01  
07-Jun-2018 14:00:00, 5.12e-01  
07-Jun-2018 15:00:00, 5.12e-01  
07-Jun-2018 16:00:00, 5.12e-01  
07-Jun-2018 17:00:00, 5.11e-01  
07-Jun-2018 18:00:00, 5.11e-01  
07-Jun-2018 19:00:00, 5.11e-01  
07-Jun-2018 20:00:00, 5.11e-01  
07-Jun-2018 21:00:00, 5.11e-01  
07-Jun-2018 22:00:00, 5.11e-01  
07-Jun-2018 23:00:00, 5.11e-01  
08-Jun-2018, 5.11e-01  
08-Jun-2018 01:00:00, 5.11e-01  
08-Jun-2018 02:00:00, 5.11e-01  
08-Jun-2018 03:00:00, 5.11e-01  
08-Jun-2018 04:00:00, 5.11e-01  
08-Jun-2018 05:00:00, 5.11e-01  
08-Jun-2018 06:00:00, 5.11e-01  
08-Jun-2018 07:00:00, 5.11e-01  
08-Jun-2018 08:00:00, 5.11e-01  
08-Jun-2018 09:00:00, 5.11e-01  
08-Jun-2018 10:00:00, 5.11e-01  
08-Jun-2018 11:00:00, 5.11e-01  
08-Jun-2018 12:00:00, 5.11e-01

08-Jun-2018 13:00:00, 5.11e-01  
08-Jun-2018 14:00:00, 5.11e-01  
08-Jun-2018 15:00:00, 5.11e-01  
08-Jun-2018 16:00:00, 5.11e-01  
08-Jun-2018 17:00:00, 5.11e-01  
08-Jun-2018 18:00:00, 5.11e-01  
08-Jun-2018 19:00:00, 5.11e-01  
08-Jun-2018 20:00:00, 5.11e-01  
08-Jun-2018 21:00:00, 5.11e-01  
08-Jun-2018 22:00:00, 5.11e-01  
08-Jun-2018 23:00:00, 5.11e-01  
09-Jun-2018, 5.11e-01  
09-Jun-2018 01:00:00, 5.11e-01  
09-Jun-2018 02:00:00, 5.11e-01  
09-Jun-2018 03:00:00, 5.11e-01  
09-Jun-2018 04:00:00, 5.11e-01  
09-Jun-2018 05:00:00, 5.11e-01  
09-Jun-2018 06:00:00, 5.11e-01  
09-Jun-2018 07:00:00, 5.11e-01  
09-Jun-2018 08:00:00, 5.11e-01  
09-Jun-2018 09:00:00, 5.11e-01  
09-Jun-2018 10:00:00, 5.11e-01  
09-Jun-2018 11:00:00, 5.11e-01  
09-Jun-2018 12:00:00, 5.11e-01  
09-Jun-2018 13:00:00, 5.12e-01  
09-Jun-2018 14:00:00, 5.12e-01  
09-Jun-2018 15:00:00, 5.12e-01  
09-Jun-2018 16:00:00, 5.13e-01  
09-Jun-2018 17:00:00, 5.13e-01  
09-Jun-2018 18:00:00, 5.13e-01  
09-Jun-2018 19:00:00, 5.13e-01  
09-Jun-2018 20:00:00, 5.13e-01  
09-Jun-2018 21:00:00, 5.12e-01  
09-Jun-2018 22:00:00, 5.11e-01  
09-Jun-2018 23:00:00, 5.11e-01  
10-Jun-2018, 5.11e-01  
10-Jun-2018 01:00:00, 5.11e-01  
10-Jun-2018 02:00:00, 5.11e-01  
10-Jun-2018 03:00:00, 5.11e-01  
10-Jun-2018 04:00:00, 5.11e-01  
10-Jun-2018 05:00:00, 5.11e-01  
10-Jun-2018 06:00:00, 5.11e-01  
10-Jun-2018 07:00:00, 5.11e-01  
10-Jun-2018 08:00:00, 5.13e-01  
10-Jun-2018 09:00:00, 5.13e-01  
10-Jun-2018 10:00:00, 5.14e-01  
10-Jun-2018 11:00:00, 5.14e-01  
10-Jun-2018 12:00:00, 5.14e-01  
10-Jun-2018 13:00:00, 5.14e-01  
10-Jun-2018 14:00:00, 5.14e-01  
10-Jun-2018 15:00:00, 5.14e-01  
10-Jun-2018 16:00:00, 5.14e-01  
10-Jun-2018 17:00:00, 5.14e-01  
10-Jun-2018 18:00:00, 5.13e-01  
10-Jun-2018 19:00:00, 5.13e-01  
10-Jun-2018 20:00:00, 5.12e-01  
10-Jun-2018 21:00:00, 5.11e-01  
10-Jun-2018 22:00:00, 5.11e-01  
10-Jun-2018 23:00:00, 5.11e-01  
11-Jun-2018, 5.11e-01  
11-Jun-2018 01:00:00, 5.11e-01  
11-Jun-2018 02:00:00, 5.11e-01  
11-Jun-2018 03:00:00, 5.11e-01  
11-Jun-2018 04:00:00, 5.11e-01



11-Jun-2018 05:00:00, 5.11e-01  
11-Jun-2018 06:00:00, 5.11e-01  
11-Jun-2018 07:00:00, 5.11e-01  
11-Jun-2018 08:00:00, 5.11e-01  
11-Jun-2018 09:00:00, 5.12e-01  
11-Jun-2018 10:00:00, 5.13e-01  
11-Jun-2018 11:00:00, 5.13e-01  
11-Jun-2018 12:00:00, 5.12e-01  
11-Jun-2018 13:00:00, 5.11e-01  
11-Jun-2018 14:00:00, 5.11e-01  
11-Jun-2018 15:00:00, 5.11e-01  
11-Jun-2018 16:00:00, 5.11e-01  
11-Jun-2018 17:00:00, 5.11e-01  
11-Jun-2018 18:00:00, 5.11e-01  
11-Jun-2018 19:00:00, 5.11e-01  
11-Jun-2018 20:00:00, 5.11e-01  
11-Jun-2018 21:00:00, 5.10e-01  
11-Jun-2018 22:00:00, 5.10e-01  
11-Jun-2018 23:00:00, 5.10e-01  
12-Jun-2018, 5.10e-01  
12-Jun-2018 01:00:00, 5.09e-01  
12-Jun-2018 02:00:00, 5.09e-01  
12-Jun-2018 03:00:00, 5.10e-01  
12-Jun-2018 04:00:00, 5.10e-01  
12-Jun-2018 05:00:00, 5.10e-01  
12-Jun-2018 06:00:00, 5.10e-01  
12-Jun-2018 07:00:00, 5.10e-01  
12-Jun-2018 08:00:00, 5.11e-01  
12-Jun-2018 09:00:00, 5.11e-01  
12-Jun-2018 10:00:00, 5.11e-01  
12-Jun-2018 11:00:00, 5.11e-01  
12-Jun-2018 12:00:00, 5.11e-01  
12-Jun-2018 13:00:00, 5.11e-01  
12-Jun-2018 14:00:00, 5.11e-01  
12-Jun-2018 15:00:00, 5.11e-01  
12-Jun-2018 16:00:00, 5.11e-01  
12-Jun-2018 17:00:00, 5.10e-01  
12-Jun-2018 18:00:00, 5.10e-01  
12-Jun-2018 19:00:00, 5.10e-01  
12-Jun-2018 20:00:00, 5.09e-01  
12-Jun-2018 21:00:00, 5.08e-01  
12-Jun-2018 22:00:00, 5.08e-01  
12-Jun-2018 23:00:00, 5.07e-01  
13-Jun-2018, 5.08e-01  
13-Jun-2018 01:00:00, 5.07e-01  
13-Jun-2018 02:00:00, 5.07e-01  
13-Jun-2018 03:00:00, 5.07e-01  
13-Jun-2018 04:00:00, 5.07e-01  
13-Jun-2018 05:00:00, 5.07e-01  
13-Jun-2018 06:00:00, 5.07e-01  
13-Jun-2018 07:00:00, 5.07e-01  
13-Jun-2018 08:00:00, 5.08e-01  
13-Jun-2018 09:00:00, 5.10e-01  
13-Jun-2018 10:00:00, 5.10e-01  
13-Jun-2018 11:00:00, 5.10e-01  
13-Jun-2018 12:00:00, 5.10e-01  
13-Jun-2018 13:00:00, 5.09e-01  
13-Jun-2018 14:00:00, 5.09e-01  
13-Jun-2018 15:00:00, 5.09e-01  
13-Jun-2018 16:00:00, 5.09e-01  
13-Jun-2018 17:00:00, 5.09e-01  
13-Jun-2018 18:00:00, 5.09e-01  
13-Jun-2018 19:00:00, 5.08e-01  
13-Jun-2018 20:00:00, 5.07e-01

13-Jun-2018 21:00:00, 5.07e-01  
13-Jun-2018 22:00:00, 5.07e-01  
13-Jun-2018 23:00:00, 5.07e-01  
14-Jun-2018, 5.07e-01  
14-Jun-2018 01:00:00, 5.07e-01  
14-Jun-2018 02:00:00, 5.07e-01  
14-Jun-2018 03:00:00, 5.07e-01  
14-Jun-2018 04:00:00, 5.07e-01  
14-Jun-2018 05:00:00, 5.07e-01  
14-Jun-2018 06:00:00, 5.07e-01  
14-Jun-2018 07:00:00, 5.07e-01  
14-Jun-2018 08:00:00, 5.07e-01  
14-Jun-2018 09:00:00, 5.07e-01  
14-Jun-2018 10:00:00, 5.08e-01  
14-Jun-2018 11:00:00, 5.07e-01  
14-Jun-2018 12:00:00, 5.07e-01  
14-Jun-2018 13:00:00, 5.07e-01  
14-Jun-2018 14:00:00, 5.07e-01  
14-Jun-2018 15:00:00, 5.07e-01  
14-Jun-2018 16:00:00, 5.07e-01  
14-Jun-2018 17:00:00, 5.07e-01  
14-Jun-2018 18:00:00, 5.07e-01  
14-Jun-2018 19:00:00, 5.07e-01  
14-Jun-2018 20:00:00, 5.07e-01  
14-Jun-2018 21:00:00, 5.06e-01  
14-Jun-2018 22:00:00, 5.06e-01  
14-Jun-2018 23:00:00, 5.06e-01  
15-Jun-2018, 5.06e-01  
15-Jun-2018 01:00:00, 5.06e-01  
15-Jun-2018 02:00:00, 5.06e-01  
15-Jun-2018 03:00:00, 5.06e-01  
15-Jun-2018 04:00:00, 5.06e-01  
15-Jun-2018 05:00:00, 5.06e-01  
15-Jun-2018 06:00:00, 5.06e-01  
15-Jun-2018 07:00:00, 5.07e-01  
15-Jun-2018 08:00:00, 5.07e-01  
15-Jun-2018 09:00:00, 5.07e-01  
15-Jun-2018 10:00:00, 5.07e-01  
15-Jun-2018 11:00:00, 5.07e-01  
15-Jun-2018 12:00:00, 5.07e-01  
15-Jun-2018 13:00:00, 5.07e-01  
15-Jun-2018 14:00:00, 5.07e-01  
15-Jun-2018 15:00:00, 5.07e-01  
15-Jun-2018 16:00:00, 5.07e-01  
15-Jun-2018 17:00:00, 5.07e-01  
15-Jun-2018 18:00:00, 5.07e-01  
15-Jun-2018 19:00:00, 5.07e-01  
15-Jun-2018 20:00:00, 5.06e-01  
15-Jun-2018 21:00:00, 5.05e-01  
15-Jun-2018 22:00:00, 5.05e-01  
15-Jun-2018 23:00:00, 5.05e-01  
16-Jun-2018, 5.04e-01  
16-Jun-2018 01:00:00, 5.04e-01  
16-Jun-2018 02:00:00, 5.04e-01  
16-Jun-2018 03:00:00, 5.04e-01  
16-Jun-2018 04:00:00, 5.04e-01  
16-Jun-2018 05:00:00, 5.05e-01  
16-Jun-2018 06:00:00, 5.04e-01  
16-Jun-2018 07:00:00, 5.05e-01  
16-Jun-2018 08:00:00, 5.05e-01  
16-Jun-2018 09:00:00, 5.06e-01  
16-Jun-2018 10:00:00, 5.06e-01  
16-Jun-2018 11:00:00, 5.06e-01  
16-Jun-2018 12:00:00, 5.06e-01

16-Jun-2018 13:00:00, 5.08e-01  
16-Jun-2018 14:00:00, 5.15e-01  
16-Jun-2018 15:00:00, 5.13e-01  
16-Jun-2018 16:00:00, 5.07e-01  
16-Jun-2018 17:00:00, 5.07e-01  
16-Jun-2018 18:00:00, 5.07e-01  
16-Jun-2018 19:00:00, 5.07e-01  
16-Jun-2018 20:00:00, 5.06e-01  
16-Jun-2018 21:00:00, 5.13e-01  
16-Jun-2018 22:00:00, 5.15e-01  
16-Jun-2018 23:00:00, 5.15e-01  
17-Jun-2018, 5.15e-01  
17-Jun-2018 01:00:00, 5.15e-01  
17-Jun-2018 02:00:00, 5.15e-01  
17-Jun-2018 03:00:00, 5.15e-01  
17-Jun-2018 04:00:00, 5.15e-01  
17-Jun-2018 05:00:00, 5.15e-01  
17-Jun-2018 06:00:00, 5.15e-01  
17-Jun-2018 07:00:00, 5.16e-01  
17-Jun-2018 08:00:00, 5.17e-01  
17-Jun-2018 09:00:00, 5.15e-01  
17-Jun-2018 10:00:00, 5.14e-01  
17-Jun-2018 11:00:00, 5.15e-01  
17-Jun-2018 12:00:00, 5.15e-01  
17-Jun-2018 13:00:00, 5.13e-01  
17-Jun-2018 14:00:00, 5.12e-01  
17-Jun-2018 15:00:00, 5.11e-01  
17-Jun-2018 16:00:00, 5.11e-01  
17-Jun-2018 17:00:00, 5.11e-01  
17-Jun-2018 18:00:00, 5.14e-01  
17-Jun-2018 19:00:00, 5.14e-01  
17-Jun-2018 20:00:00, 5.12e-01  
17-Jun-2018 21:00:00, 5.11e-01  
17-Jun-2018 22:00:00, 5.11e-01  
17-Jun-2018 23:00:00, 5.11e-01  
18-Jun-2018, 5.13e-01  
18-Jun-2018 01:00:00, 5.15e-01  
18-Jun-2018 02:00:00, 5.15e-01  
18-Jun-2018 03:00:00, 5.15e-01  
18-Jun-2018 04:00:00, 5.15e-01  
18-Jun-2018 05:00:00, 5.15e-01  
18-Jun-2018 06:00:00, 5.15e-01  
18-Jun-2018 07:00:00, 5.15e-01  
18-Jun-2018 08:00:00, 5.15e-01  
18-Jun-2018 09:00:00, 5.15e-01  
18-Jun-2018 10:00:00, 5.12e-01  
18-Jun-2018 11:00:00, 5.11e-01  
18-Jun-2018 12:00:00, 5.11e-01  
18-Jun-2018 13:00:00, 5.11e-01  
18-Jun-2018 14:00:00, 5.11e-01  
18-Jun-2018 15:00:00, 5.11e-01  
18-Jun-2018 16:00:00, 5.11e-01  
18-Jun-2018 17:00:00, 5.10e-01  
18-Jun-2018 18:00:00, 5.10e-01  
18-Jun-2018 19:00:00, 5.09e-01  
18-Jun-2018 20:00:00, 5.08e-01  
18-Jun-2018 21:00:00, 5.07e-01  
18-Jun-2018 22:00:00, 5.07e-01  
18-Jun-2018 23:00:00, 5.07e-01  
19-Jun-2018, 5.07e-01  
19-Jun-2018 01:00:00, 5.07e-01  
19-Jun-2018 02:00:00, 5.07e-01  
19-Jun-2018 03:00:00, 5.07e-01  
19-Jun-2018 04:00:00, 5.07e-01

19-Jun-2018 05:00:00, 5.07e-01  
19-Jun-2018 06:00:00, 5.07e-01  
19-Jun-2018 07:00:00, 5.08e-01  
19-Jun-2018 08:00:00, 5.09e-01  
19-Jun-2018 09:00:00, 5.08e-01  
19-Jun-2018 10:00:00, 5.08e-01  
19-Jun-2018 11:00:00, 5.08e-01  
19-Jun-2018 12:00:00, 5.07e-01  
19-Jun-2018 13:00:00, 5.07e-01  
19-Jun-2018 14:00:00, 5.07e-01  
19-Jun-2018 15:00:00, 5.07e-01  
19-Jun-2018 16:00:00, 5.07e-01  
19-Jun-2018 17:00:00, 5.07e-01  
19-Jun-2018 18:00:00, 5.07e-01  
19-Jun-2018 19:00:00, 5.06e-01  
19-Jun-2018 20:00:00, 5.05e-01  
19-Jun-2018 21:00:00, 5.04e-01  
19-Jun-2018 22:00:00, 5.04e-01  
19-Jun-2018 23:00:00, 5.03e-01  
20-Jun-2018, 5.04e-01  
20-Jun-2018 01:00:00, 5.04e-01  
20-Jun-2018 02:00:00, 5.04e-01  
20-Jun-2018 03:00:00, 5.04e-01  
20-Jun-2018 04:00:00, 5.04e-01  
20-Jun-2018 05:00:00, 5.05e-01  
20-Jun-2018 06:00:00, 5.05e-01  
20-Jun-2018 07:00:00, 5.06e-01  
20-Jun-2018 08:00:00, 5.07e-01  
20-Jun-2018 09:00:00, 5.06e-01  
20-Jun-2018 10:00:00, 5.06e-01  
20-Jun-2018 11:00:00, 5.06e-01  
20-Jun-2018 12:00:00, 5.06e-01  
20-Jun-2018 13:00:00, 5.06e-01  
20-Jun-2018 14:00:00, 5.06e-01  
20-Jun-2018 15:00:00, 5.06e-01  
20-Jun-2018 16:00:00, 5.06e-01  
20-Jun-2018 17:00:00, 5.06e-01  
20-Jun-2018 18:00:00, 5.05e-01  
20-Jun-2018 19:00:00, 5.04e-01  
20-Jun-2018 20:00:00, 5.03e-01  
20-Jun-2018 21:00:00, 5.03e-01  
20-Jun-2018 22:00:00, 5.03e-01  
20-Jun-2018 23:00:00, 5.03e-01  
21-Jun-2018, 5.03e-01  
21-Jun-2018 01:00:00, 5.03e-01  
21-Jun-2018 02:00:00, 5.04e-01  
21-Jun-2018 03:00:00, 5.03e-01  
21-Jun-2018 04:00:00, 5.04e-01  
21-Jun-2018 05:00:00, 5.04e-01  
21-Jun-2018 06:00:00, 5.04e-01  
21-Jun-2018 07:00:00, 5.06e-01  
21-Jun-2018 08:00:00, 5.07e-01  
21-Jun-2018 09:00:00, 5.05e-01  
21-Jun-2018 10:00:00, 5.05e-01  
21-Jun-2018 11:00:00, 5.06e-01  
21-Jun-2018 12:00:00, 5.04e-01  
21-Jun-2018 13:00:00, 5.04e-01  
21-Jun-2018 14:00:00, 5.04e-01  
21-Jun-2018 15:00:00, 5.03e-01  
21-Jun-2018 16:00:00, 5.03e-01  
21-Jun-2018 17:00:00, 5.03e-01  
21-Jun-2018 18:00:00, 5.03e-01  
21-Jun-2018 19:00:00, 5.03e-01  
21-Jun-2018 20:00:00, 5.03e-01

21-Jun-2018 21:00:00, 5.03e-01  
21-Jun-2018 22:00:00, 5.02e-01  
21-Jun-2018 23:00:00, 5.02e-01  
22-Jun-2018, 5.02e-01  
22-Jun-2018 01:00:00, 5.03e-01  
22-Jun-2018 02:00:00, 5.02e-01  
22-Jun-2018 03:00:00, 5.02e-01  
22-Jun-2018 04:00:00, 5.02e-01  
22-Jun-2018 05:00:00, 5.02e-01  
22-Jun-2018 06:00:00, 5.03e-01  
22-Jun-2018 07:00:00, 5.03e-01  
22-Jun-2018 08:00:00, 5.03e-01  
22-Jun-2018 09:00:00, 5.03e-01  
22-Jun-2018 10:00:00, 5.03e-01  
22-Jun-2018 11:00:00, 5.03e-01  
22-Jun-2018 12:00:00, 5.03e-01  
22-Jun-2018 13:00:00, 5.03e-01  
22-Jun-2018 14:00:00, 5.03e-01  
22-Jun-2018 15:00:00, 5.03e-01  
22-Jun-2018 16:00:00, 5.03e-01  
22-Jun-2018 17:00:00, 5.03e-01  
22-Jun-2018 18:00:00, 5.02e-01  
22-Jun-2018 19:00:00, 5.02e-01  
22-Jun-2018 20:00:00, 5.02e-01  
22-Jun-2018 21:00:00, 5.00e-01  
22-Jun-2018 22:00:00, 5.00e-01  
22-Jun-2018 23:00:00, 4.99e-01  
23-Jun-2018, 5.00e-01  
23-Jun-2018 01:00:00, 5.00e-01  
23-Jun-2018 02:00:00, 5.00e-01  
23-Jun-2018 03:00:00, 5.00e-01  
23-Jun-2018 04:00:00, 5.00e-01  
23-Jun-2018 05:00:00, 5.00e-01  
23-Jun-2018 06:00:00, 5.00e-01  
23-Jun-2018 07:00:00, 5.01e-01  
23-Jun-2018 08:00:00, 5.02e-01  
23-Jun-2018 09:00:00, 5.02e-01  
23-Jun-2018 10:00:00, 5.03e-01  
23-Jun-2018 11:00:00, 5.03e-01  
23-Jun-2018 12:00:00, 5.02e-01  
23-Jun-2018 13:00:00, 5.02e-01  
23-Jun-2018 14:00:00, 5.02e-01  
23-Jun-2018 15:00:00, 5.02e-01  
23-Jun-2018 16:00:00, 5.02e-01  
23-Jun-2018 17:00:00, 5.02e-01  
23-Jun-2018 18:00:00, 5.00e-01  
23-Jun-2018 19:00:00, 5.00e-01  
23-Jun-2018 20:00:00, 4.99e-01  
23-Jun-2018 21:00:00, 4.98e-01  
23-Jun-2018 22:00:00, 4.98e-01  
23-Jun-2018 23:00:00, 4.98e-01  
24-Jun-2018, 4.98e-01  
24-Jun-2018 01:00:00, 4.98e-01  
24-Jun-2018 02:00:00, 4.98e-01  
24-Jun-2018 03:00:00, 4.98e-01  
24-Jun-2018 04:00:00, 4.98e-01  
24-Jun-2018 05:00:00, 4.98e-01  
24-Jun-2018 06:00:00, 4.98e-01  
24-Jun-2018 07:00:00, 4.98e-01  
24-Jun-2018 08:00:00, 4.99e-01  
24-Jun-2018 09:00:00, 4.99e-01  
24-Jun-2018 10:00:00, 4.99e-01  
24-Jun-2018 11:00:00, 4.99e-01  
24-Jun-2018 12:00:00, 4.99e-01

24-Jun-2018 13:00:00, 4.99e-01  
24-Jun-2018 14:00:00, 4.99e-01  
24-Jun-2018 15:00:00, 4.98e-01  
24-Jun-2018 16:00:00, 4.98e-01  
24-Jun-2018 17:00:00, 4.97e-01  
24-Jun-2018 18:00:00, 4.96e-01  
24-Jun-2018 19:00:00, 4.96e-01  
24-Jun-2018 20:00:00, 4.96e-01  
24-Jun-2018 21:00:00, 4.95e-01  
24-Jun-2018 22:00:00, 4.95e-01  
24-Jun-2018 23:00:00, 4.95e-01  
25-Jun-2018, 4.95e-01  
25-Jun-2018 01:00:00, 4.95e-01  
25-Jun-2018 02:00:00, 4.95e-01  
25-Jun-2018 03:00:00, 4.95e-01  
25-Jun-2018 04:00:00, 4.96e-01  
25-Jun-2018 05:00:00, 4.96e-01  
25-Jun-2018 06:00:00, 4.96e-01  
25-Jun-2018 07:00:00, 4.96e-01  
25-Jun-2018 08:00:00, 4.98e-01  
25-Jun-2018 09:00:00, 4.98e-01  
25-Jun-2018 10:00:00, 4.99e-01  
25-Jun-2018 11:00:00, 4.98e-01  
25-Jun-2018 12:00:00, 4.96e-01  
25-Jun-2018 13:00:00, 4.95e-01  
25-Jun-2018 14:00:00, 4.95e-01  
25-Jun-2018 15:00:00, 4.94e-01  
25-Jun-2018 16:00:00, 4.93e-01  
25-Jun-2018 17:00:00, 4.92e-01  
25-Jun-2018 18:00:00, 4.91e-01  
25-Jun-2018 19:00:00, 4.91e-01  
25-Jun-2018 20:00:00, 4.89e-01  
25-Jun-2018 21:00:00, 4.88e-01  
25-Jun-2018 22:00:00, 4.88e-01  
25-Jun-2018 23:00:00, 4.88e-01  
26-Jun-2018, 4.89e-01  
26-Jun-2018 01:00:00, 4.90e-01  
26-Jun-2018 02:00:00, 4.90e-01  
26-Jun-2018 03:00:00, 4.91e-01  
26-Jun-2018 04:00:00, 4.91e-01  
26-Jun-2018 05:00:00, 4.91e-01  
26-Jun-2018 06:00:00, 4.91e-01  
26-Jun-2018 07:00:00, 4.92e-01  
26-Jun-2018 08:00:00, 4.94e-01  
26-Jun-2018 09:00:00, 4.93e-01  
26-Jun-2018 10:00:00, 4.93e-01  
26-Jun-2018 11:00:00, 4.92e-01  
26-Jun-2018 12:00:00, 4.82e-01  
26-Jun-2018 13:00:00, 4.25e-01  
26-Jun-2018 14:00:00, 3.98e-01  
26-Jun-2018 15:00:00, 3.85e-01  
26-Jun-2018 16:00:00, 3.79e-01  
26-Jun-2018 17:00:00, 3.75e-01  
26-Jun-2018 18:00:00, 3.73e-01  
26-Jun-2018 19:00:00, 3.71e-01  
26-Jun-2018 20:00:00, 3.70e-01  
26-Jun-2018 21:00:00, 3.71e-01  
26-Jun-2018 22:00:00, 3.74e-01  
26-Jun-2018 23:00:00, 3.76e-01  
27-Jun-2018, 3.80e-01  
27-Jun-2018 01:00:00, 3.84e-01  
27-Jun-2018 02:00:00, 3.90e-01  
27-Jun-2018 03:00:00, 3.94e-01  
27-Jun-2018 04:00:00, 3.98e-01

27-Jun-2018 05:00:00, 4.02e-01  
27-Jun-2018 06:00:00, 4.06e-01  
27-Jun-2018 07:00:00, 4.08e-01  
27-Jun-2018 08:00:00, 4.12e-01  
27-Jun-2018 09:00:00, 4.12e-01  
27-Jun-2018 10:00:00, 3.90e-01  
27-Jun-2018 11:00:00, 3.72e-01  
27-Jun-2018 12:00:00, 3.66e-01  
27-Jun-2018 13:00:00, 3.62e-01  
27-Jun-2018 14:00:00, 3.60e-01  
27-Jun-2018 15:00:00, 3.57e-01  
27-Jun-2018 16:00:00, 3.55e-01  
27-Jun-2018 17:00:00, 3.52e-01  
27-Jun-2018 18:00:00, 3.50e-01  
27-Jun-2018 19:00:00, 3.49e-01  
27-Jun-2018 20:00:00, 3.48e-01  
27-Jun-2018 21:00:00, 3.48e-01  
27-Jun-2018 22:00:00, 3.49e-01  
27-Jun-2018 23:00:00, 3.50e-01  
28-Jun-2018, 3.51e-01  
28-Jun-2018 01:00:00, 3.52e-01  
28-Jun-2018 02:00:00, 3.53e-01  
28-Jun-2018 03:00:00, 3.55e-01  
28-Jun-2018 04:00:00, 3.56e-01  
28-Jun-2018 05:00:00, 3.57e-01  
28-Jun-2018 06:00:00, 3.57e-01  
28-Jun-2018 07:00:00, 3.58e-01  
28-Jun-2018 08:00:00, 3.59e-01  
28-Jun-2018 09:00:00, 3.60e-01  
28-Jun-2018 10:00:00, 3.57e-01  
28-Jun-2018 11:00:00, 3.50e-01  
28-Jun-2018 12:00:00, 3.47e-01  
28-Jun-2018 13:00:00, 3.44e-01  
28-Jun-2018 14:00:00, 3.41e-01  
28-Jun-2018 15:00:00, 3.40e-01  
28-Jun-2018 16:00:00, 3.39e-01  
28-Jun-2018 17:00:00, 3.39e-01  
28-Jun-2018 18:00:00, 3.38e-01  
28-Jun-2018 19:00:00, 3.37e-01  
28-Jun-2018 20:00:00, 3.37e-01  
28-Jun-2018 21:00:00, 3.37e-01  
28-Jun-2018 22:00:00, 3.37e-01  
28-Jun-2018 23:00:00, 3.37e-01  
29-Jun-2018, 3.37e-01  
29-Jun-2018 01:00:00, 3.37e-01  
29-Jun-2018 02:00:00, 3.38e-01  
29-Jun-2018 03:00:00, 3.38e-01  
29-Jun-2018 04:00:00, 3.38e-01  
29-Jun-2018 05:00:00, 3.38e-01  
29-Jun-2018 06:00:00, 3.38e-01  
29-Jun-2018 07:00:00, 3.38e-01  
29-Jun-2018 08:00:00, 3.39e-01  
29-Jun-2018 09:00:00, 3.39e-01  
29-Jun-2018 10:00:00, 3.39e-01  
29-Jun-2018 11:00:00, 3.38e-01  
29-Jun-2018 12:00:00, 3.36e-01  
29-Jun-2018 13:00:00, 3.35e-01  
29-Jun-2018 14:00:00, 3.35e-01  
29-Jun-2018 15:00:00, 3.34e-01  
29-Jun-2018 16:00:00, 3.33e-01  
29-Jun-2018 17:00:00, 3.33e-01  
29-Jun-2018 18:00:00, 3.33e-01  
29-Jun-2018 19:00:00, 3.32e-01  
29-Jun-2018 20:00:00, 3.32e-01

29-Jun-2018 21:00:00, 3.32e-01  
29-Jun-2018 22:00:00, 3.32e-01  
29-Jun-2018 23:00:00, 3.32e-01  
30-Jun-2018, 3.32e-01  
30-Jun-2018 01:00:00, 3.32e-01  
30-Jun-2018 02:00:00, 3.32e-01  
30-Jun-2018 03:00:00, 3.32e-01  
30-Jun-2018 04:00:00, 3.32e-01  
30-Jun-2018 05:00:00, 3.32e-01  
30-Jun-2018 06:00:00, 3.32e-01  
30-Jun-2018 07:00:00, 3.32e-01  
30-Jun-2018 08:00:00, 3.33e-01  
30-Jun-2018 09:00:00, 3.33e-01  
30-Jun-2018 10:00:00, 3.33e-01  
30-Jun-2018 11:00:00, 3.33e-01  
30-Jun-2018 12:00:00, 3.32e-01  
30-Jun-2018 13:00:00, 3.31e-01  
30-Jun-2018 14:00:00, 3.31e-01  
30-Jun-2018 15:00:00, 3.31e-01  
30-Jun-2018 16:00:00, 3.30e-01  
30-Jun-2018 17:00:00, 3.30e-01  
30-Jun-2018 18:00:00, 3.30e-01  
30-Jun-2018 19:00:00, 3.30e-01  
30-Jun-2018 20:00:00, 3.29e-01  
30-Jun-2018 21:00:00, 3.29e-01  
30-Jun-2018 22:00:00, 3.29e-01  
30-Jun-2018 23:00:00, 3.29e-01  
01-Jul-2018, 3.29e-01  
01-Jul-2018 01:00:00, 3.29e-01  
01-Jul-2018 02:00:00, 3.29e-01  
01-Jul-2018 03:00:00, 3.29e-01  
01-Jul-2018 04:00:00, 3.29e-01  
01-Jul-2018 05:00:00, 3.29e-01  
01-Jul-2018 06:00:00, 3.29e-01  
01-Jul-2018 07:00:00, 3.29e-01  
01-Jul-2018 08:00:00, 3.30e-01  
01-Jul-2018 09:00:00, 3.30e-01  
01-Jul-2018 10:00:00, 3.30e-01  
01-Jul-2018 11:00:00, 3.30e-01  
01-Jul-2018 12:00:00, 3.29e-01  
01-Jul-2018 13:00:00, 3.29e-01  
01-Jul-2018 14:00:00, 3.29e-01  
01-Jul-2018 15:00:00, 3.29e-01  
01-Jul-2018 16:00:00, 3.28e-01  
01-Jul-2018 17:00:00, 3.28e-01  
01-Jul-2018 18:00:00, 3.28e-01  
01-Jul-2018 19:00:00, 3.28e-01  
01-Jul-2018 20:00:00, 3.27e-01  
01-Jul-2018 21:00:00, 3.27e-01  
01-Jul-2018 22:00:00, 3.26e-01  
01-Jul-2018 23:00:00, 3.26e-01  
02-Jul-2018, 3.26e-01  
02-Jul-2018 01:00:00, 3.26e-01  
02-Jul-2018 02:00:00, 3.26e-01  
02-Jul-2018 03:00:00, 3.26e-01  
02-Jul-2018 04:00:00, 3.27e-01  
02-Jul-2018 05:00:00, 3.27e-01  
02-Jul-2018 06:00:00, 3.26e-01  
02-Jul-2018 07:00:00, 3.26e-01  
02-Jul-2018 08:00:00, 3.27e-01  
02-Jul-2018 09:00:00, 3.27e-01  
02-Jul-2018 10:00:00, 3.27e-01  
02-Jul-2018 11:00:00, 3.27e-01  
02-Jul-2018 12:00:00, 3.27e-01



02-Jul-2018 13:00:00, 3.27e-01  
02-Jul-2018 14:00:00, 3.27e-01  
02-Jul-2018 15:00:00, 3.27e-01  
02-Jul-2018 16:00:00, 3.26e-01  
02-Jul-2018 17:00:00, 3.26e-01  
02-Jul-2018 18:00:00, 3.25e-01  
02-Jul-2018 19:00:00, 3.25e-01  
02-Jul-2018 20:00:00, 3.24e-01  
02-Jul-2018 21:00:00, 3.24e-01  
02-Jul-2018 22:00:00, 3.24e-01  
02-Jul-2018 23:00:00, 3.24e-01  
03-Jul-2018, 3.24e-01  
03-Jul-2018 01:00:00, 3.24e-01  
03-Jul-2018 02:00:00, 3.24e-01  
03-Jul-2018 03:00:00, 3.24e-01  
03-Jul-2018 04:00:00, 3.24e-01  
03-Jul-2018 05:00:00, 3.24e-01  
03-Jul-2018 06:00:00, 3.24e-01  
03-Jul-2018 07:00:00, 3.24e-01  
03-Jul-2018 08:00:00, 3.24e-01  
03-Jul-2018 09:00:00, 3.24e-01  
03-Jul-2018 10:00:00, 3.24e-01  
03-Jul-2018 11:00:00, 3.24e-01  
03-Jul-2018 12:00:00, 3.24e-01  
03-Jul-2018 13:00:00, 3.24e-01  
03-Jul-2018 14:00:00, 3.24e-01  
03-Jul-2018 15:00:00, 3.24e-01  
03-Jul-2018 16:00:00, 3.23e-01  
03-Jul-2018 17:00:00, 3.23e-01  
03-Jul-2018 18:00:00, 3.23e-01  
03-Jul-2018 19:00:00, 3.23e-01  
03-Jul-2018 20:00:00, 3.23e-01  
03-Jul-2018 21:00:00, 3.23e-01  
03-Jul-2018 22:00:00, 3.23e-01  
03-Jul-2018 23:00:00, 3.23e-01  
04-Jul-2018, 3.23e-01  
04-Jul-2018 01:00:00, 3.23e-01  
04-Jul-2018 02:00:00, 3.23e-01  
04-Jul-2018 03:00:00, 3.23e-01  
04-Jul-2018 04:00:00, 3.23e-01  
04-Jul-2018 05:00:00, 3.23e-01  
04-Jul-2018 06:00:00, 3.23e-01  
04-Jul-2018 07:00:00, 3.23e-01  
04-Jul-2018 08:00:00, 3.23e-01  
04-Jul-2018 09:00:00, 3.23e-01  
04-Jul-2018 10:00:00, 3.23e-01  
04-Jul-2018 11:00:00, 3.23e-01  
04-Jul-2018 12:00:00, 3.23e-01  
04-Jul-2018 13:00:00, 3.22e-01  
04-Jul-2018 14:00:00, 3.22e-01  
04-Jul-2018 15:00:00, 3.22e-01  
04-Jul-2018 16:00:00, 3.22e-01  
04-Jul-2018 17:00:00, 3.22e-01  
04-Jul-2018 18:00:00, 3.21e-01  
04-Jul-2018 19:00:00, 3.21e-01  
04-Jul-2018 20:00:00, 3.21e-01  
04-Jul-2018 21:00:00, 3.21e-01  
04-Jul-2018 22:00:00, 3.21e-01  
04-Jul-2018 23:00:00, 3.21e-01  
05-Jul-2018, 3.21e-01  
05-Jul-2018 01:00:00, 3.21e-01  
05-Jul-2018 02:00:00, 3.21e-01  
05-Jul-2018 03:00:00, 3.21e-01  
05-Jul-2018 04:00:00, 3.21e-01

05-Jul-2018 05:00:00, 3.21e-01  
05-Jul-2018 06:00:00, 3.21e-01  
05-Jul-2018 07:00:00, 3.21e-01  
05-Jul-2018 08:00:00, 3.21e-01  
05-Jul-2018 09:00:00, 3.21e-01  
05-Jul-2018 10:00:00, 3.21e-01  
05-Jul-2018 11:00:00, 3.21e-01  
05-Jul-2018 12:00:00, 3.21e-01  
05-Jul-2018 13:00:00, 3.21e-01  
05-Jul-2018 14:00:00, 3.21e-01  
05-Jul-2018 15:00:00, 3.21e-01  
05-Jul-2018 16:00:00, 3.21e-01  
05-Jul-2018 17:00:00, 3.20e-01  
05-Jul-2018 18:00:00, 3.20e-01  
05-Jul-2018 19:00:00, 3.20e-01  
05-Jul-2018 20:00:00, 3.20e-01  
05-Jul-2018 21:00:00, 3.20e-01  
05-Jul-2018 22:00:00, 3.20e-01  
05-Jul-2018 23:00:00, 3.20e-01  
06-Jul-2018, 3.20e-01  
06-Jul-2018 01:00:00, 3.20e-01  
06-Jul-2018 02:00:00, 3.20e-01  
06-Jul-2018 03:00:00, 3.19e-01  
06-Jul-2018 04:00:00, 3.19e-01  
06-Jul-2018 05:00:00, 3.19e-01  
06-Jul-2018 06:00:00, 3.20e-01  
06-Jul-2018 07:00:00, 3.20e-01  
06-Jul-2018 08:00:00, 3.20e-01  
06-Jul-2018 09:00:00, 3.20e-01  
06-Jul-2018 10:00:00, 3.20e-01  
06-Jul-2018 11:00:00, 3.20e-01  
06-Jul-2018 12:00:00, 3.20e-01  
06-Jul-2018 13:00:00, 3.20e-01  
06-Jul-2018 14:00:00, 3.19e-01  
06-Jul-2018 15:00:00, 3.19e-01  
06-Jul-2018 16:00:00, 3.19e-01  
06-Jul-2018 17:00:00, 3.19e-01  
06-Jul-2018 18:00:00, 3.19e-01  
06-Jul-2018 19:00:00, 3.19e-01  
06-Jul-2018 20:00:00, 3.18e-01  
06-Jul-2018 21:00:00, 3.18e-01  
06-Jul-2018 22:00:00, 3.18e-01  
06-Jul-2018 23:00:00, 3.18e-01  
07-Jul-2018, 3.18e-01  
07-Jul-2018 01:00:00, 3.18e-01  
07-Jul-2018 02:00:00, 3.18e-01  
07-Jul-2018 03:00:00, 3.18e-01  
07-Jul-2018 04:00:00, 3.18e-01  
07-Jul-2018 05:00:00, 3.18e-01  
07-Jul-2018 06:00:00, 3.18e-01  
07-Jul-2018 07:00:00, 3.18e-01  
07-Jul-2018 08:00:00, 3.18e-01  
07-Jul-2018 09:00:00, 3.18e-01  
07-Jul-2018 10:00:00, 3.18e-01  
07-Jul-2018 11:00:00, 3.18e-01  
07-Jul-2018 12:00:00, 3.18e-01  
07-Jul-2018 13:00:00, 3.18e-01  
07-Jul-2018 14:00:00, 3.18e-01  
07-Jul-2018 15:00:00, 3.18e-01  
07-Jul-2018 16:00:00, 3.17e-01  
07-Jul-2018 17:00:00, 3.17e-01  
07-Jul-2018 18:00:00, 3.17e-01  
07-Jul-2018 19:00:00, 3.19e-01  
07-Jul-2018 20:00:00, 3.20e-01

07-Jul-2018 21:00:00, 3.19e-01  
07-Jul-2018 22:00:00, 3.19e-01  
07-Jul-2018 23:00:00, 3.19e-01  
08-Jul-2018, 3.19e-01  
08-Jul-2018 01:00:00, 3.19e-01  
08-Jul-2018 02:00:00, 3.20e-01  
08-Jul-2018 03:00:00, 3.20e-01  
08-Jul-2018 04:00:00, 3.20e-01  
08-Jul-2018 05:00:00, 3.21e-01  
08-Jul-2018 06:00:00, 3.21e-01  
08-Jul-2018 07:00:00, 3.21e-01  
08-Jul-2018 08:00:00, 3.20e-01  
08-Jul-2018 09:00:00, 3.18e-01  
08-Jul-2018 10:00:00, 3.17e-01  
08-Jul-2018 11:00:00, 3.17e-01  
08-Jul-2018 12:00:00, 3.17e-01  
08-Jul-2018 13:00:00, 3.17e-01  
08-Jul-2018 14:00:00, 3.17e-01  
08-Jul-2018 15:00:00, 3.18e-01  
08-Jul-2018 16:00:00, 3.20e-01  
08-Jul-2018 17:00:00, 3.20e-01  
08-Jul-2018 18:00:00, 3.20e-01  
08-Jul-2018 19:00:00, 3.20e-01  
08-Jul-2018 20:00:00, 3.20e-01  
08-Jul-2018 21:00:00, 3.20e-01  
08-Jul-2018 22:00:00, 3.20e-01  
08-Jul-2018 23:00:00, 3.20e-01  
09-Jul-2018, 3.20e-01  
09-Jul-2018 01:00:00, 3.20e-01  
09-Jul-2018 02:00:00, 3.20e-01  
09-Jul-2018 03:00:00, 3.20e-01  
09-Jul-2018 04:00:00, 3.20e-01  
09-Jul-2018 05:00:00, 3.20e-01  
09-Jul-2018 06:00:00, 3.20e-01  
09-Jul-2018 07:00:00, 3.21e-01  
09-Jul-2018 08:00:00, 3.20e-01  
09-Jul-2018 09:00:00, 3.18e-01  
09-Jul-2018 10:00:00, 3.18e-01  
09-Jul-2018 11:00:00, 3.18e-01  
09-Jul-2018 12:00:00, 3.18e-01  
09-Jul-2018 13:00:00, 3.17e-01  
09-Jul-2018 14:00:00, 3.17e-01  
09-Jul-2018 15:00:00, 3.17e-01  
09-Jul-2018 16:00:00, 3.17e-01  
09-Jul-2018 17:00:00, 3.17e-01  
09-Jul-2018 18:00:00, 3.17e-01  
09-Jul-2018 19:00:00, 3.16e-01  
09-Jul-2018 20:00:00, 3.16e-01  
09-Jul-2018 21:00:00, 3.16e-01  
09-Jul-2018 22:00:00, 3.16e-01  
09-Jul-2018 23:00:00, 3.16e-01  
10-Jul-2018, 3.16e-01  
10-Jul-2018 01:00:00, 3.16e-01  
10-Jul-2018 02:00:00, 3.16e-01  
10-Jul-2018 03:00:00, 3.16e-01  
10-Jul-2018 04:00:00, 3.16e-01  
10-Jul-2018 05:00:00, 3.16e-01  
10-Jul-2018 06:00:00, 3.16e-01  
10-Jul-2018 07:00:00, 3.16e-01  
10-Jul-2018 08:00:00, 3.16e-01  
10-Jul-2018 09:00:00, 3.16e-01  
10-Jul-2018 10:00:00, 3.16e-01  
10-Jul-2018 11:00:00, 3.16e-01  
10-Jul-2018 12:00:00, 3.16e-01

10-Jul-2018 13:00:00, 3.16e-01  
10-Jul-2018 14:00:00, 3.16e-01  
10-Jul-2018 15:00:00, 3.15e-01  
10-Jul-2018 16:00:00, 3.19e-01  
10-Jul-2018 17:00:00, 3.18e-01  
10-Jul-2018 18:00:00, 3.18e-01  
10-Jul-2018 19:00:00, 3.16e-01  
10-Jul-2018 20:00:00, 3.18e-01  
10-Jul-2018 21:00:00, 3.18e-01  
10-Jul-2018 22:00:00, 3.18e-01  
10-Jul-2018 23:00:00, 3.18e-01  
11-Jul-2018, 3.18e-01  
11-Jul-2018 01:00:00, 3.18e-01  
11-Jul-2018 02:00:00, 3.18e-01  
11-Jul-2018 03:00:00, 3.18e-01  
11-Jul-2018 04:00:00, 3.18e-01  
11-Jul-2018 05:00:00, 3.18e-01  
11-Jul-2018 06:00:00, 3.18e-01  
11-Jul-2018 07:00:00, 3.18e-01  
11-Jul-2018 08:00:00, 3.18e-01  
11-Jul-2018 09:00:00, 3.17e-01  
11-Jul-2018 10:00:00, 3.17e-01  
11-Jul-2018 11:00:00, 3.16e-01  
11-Jul-2018 12:00:00, 3.16e-01  
11-Jul-2018 13:00:00, 3.16e-01  
11-Jul-2018 14:00:00, 3.16e-01  
11-Jul-2018 15:00:00, 3.17e-01  
11-Jul-2018 16:00:00, 3.18e-01  
11-Jul-2018 17:00:00, 3.17e-01  
11-Jul-2018 18:00:00, 3.16e-01  
11-Jul-2018 19:00:00, 3.16e-01  
11-Jul-2018 20:00:00, 3.16e-01  
11-Jul-2018 21:00:00, 3.16e-01  
11-Jul-2018 22:00:00, 3.16e-01  
11-Jul-2018 23:00:00, 3.16e-01  
12-Jul-2018, 3.16e-01  
12-Jul-2018 01:00:00, 3.17e-01  
12-Jul-2018 02:00:00, 3.17e-01  
12-Jul-2018 03:00:00, 3.17e-01  
12-Jul-2018 04:00:00, 3.17e-01  
12-Jul-2018 05:00:00, 3.17e-01  
12-Jul-2018 06:00:00, 3.17e-01  
12-Jul-2018 07:00:00, 3.17e-01  
12-Jul-2018 08:00:00, 3.17e-01  
12-Jul-2018 09:00:00, 3.16e-01  
12-Jul-2018 10:00:00, 3.16e-01  
12-Jul-2018 11:00:00, 3.16e-01  
12-Jul-2018 12:00:00, 3.16e-01  
12-Jul-2018 13:00:00, 3.16e-01  
12-Jul-2018 14:00:00, 3.16e-01  
12-Jul-2018 15:00:00, 3.16e-01  
12-Jul-2018 16:00:00, 3.16e-01  
12-Jul-2018 17:00:00, 3.17e-01  
12-Jul-2018 18:00:00, 3.16e-01  
12-Jul-2018 19:00:00, 3.16e-01  
12-Jul-2018 20:00:00, 3.16e-01  
12-Jul-2018 21:00:00, 3.16e-01  
12-Jul-2018 22:00:00, 3.17e-01  
12-Jul-2018 23:00:00, 3.18e-01  
13-Jul-2018, 3.18e-01  
13-Jul-2018 01:00:00, 3.18e-01  
13-Jul-2018 02:00:00, 3.18e-01  
13-Jul-2018 03:00:00, 3.18e-01  
13-Jul-2018 04:00:00, 3.18e-01

13-Jul-2018 05:00:00, 3.18e-01  
13-Jul-2018 06:00:00, 3.18e-01  
13-Jul-2018 07:00:00, 3.18e-01  
13-Jul-2018 08:00:00, 3.18e-01  
13-Jul-2018 09:00:00, 3.16e-01  
13-Jul-2018 10:00:00, 3.16e-01  
13-Jul-2018 11:00:00, 3.16e-01  
13-Jul-2018 12:00:00, 3.16e-01  
13-Jul-2018 13:00:00, 3.16e-01  
13-Jul-2018 14:00:00, 3.16e-01  
13-Jul-2018 15:00:00, 3.15e-01  
13-Jul-2018 16:00:00, 3.15e-01  
13-Jul-2018 17:00:00, 3.15e-01  
13-Jul-2018 18:00:00, 3.15e-01  
13-Jul-2018 19:00:00, 3.15e-01  
13-Jul-2018 20:00:00, 3.15e-01  
13-Jul-2018 21:00:00, 3.15e-01  
13-Jul-2018 22:00:00, 3.15e-01  
13-Jul-2018 23:00:00, 3.15e-01  
14-Jul-2018, 3.15e-01  
14-Jul-2018 01:00:00, 3.15e-01  
14-Jul-2018 02:00:00, 3.15e-01  
14-Jul-2018 03:00:00, 3.15e-01  
14-Jul-2018 04:00:00, 3.15e-01  
14-Jul-2018 05:00:00, 3.15e-01  
14-Jul-2018 06:00:00, 3.15e-01  
14-Jul-2018 07:00:00, 3.15e-01  
14-Jul-2018 08:00:00, 3.15e-01  
14-Jul-2018 09:00:00, 3.15e-01  
14-Jul-2018 10:00:00, 3.15e-01  
14-Jul-2018 11:00:00, 3.15e-01  
14-Jul-2018 12:00:00, 3.15e-01  
14-Jul-2018 13:00:00, 3.15e-01  
14-Jul-2018 14:00:00, 3.15e-01  
14-Jul-2018 15:00:00, 3.14e-01  
14-Jul-2018 16:00:00, 3.14e-01  
14-Jul-2018 17:00:00, 3.14e-01  
14-Jul-2018 18:00:00, 3.14e-01  
14-Jul-2018 19:00:00, 3.14e-01  
14-Jul-2018 20:00:00, 3.14e-01  
14-Jul-2018 21:00:00, 3.13e-01  
14-Jul-2018 22:00:00, 3.13e-01  
14-Jul-2018 23:00:00, 3.13e-01  
15-Jul-2018, 3.13e-01  
15-Jul-2018 01:00:00, 3.13e-01  
15-Jul-2018 02:00:00, 3.13e-01  
15-Jul-2018 03:00:00, 3.13e-01  
15-Jul-2018 04:00:00, 3.13e-01  
15-Jul-2018 05:00:00, 3.13e-01  
15-Jul-2018 06:00:00, 3.13e-01  
15-Jul-2018 07:00:00, 3.13e-01  
15-Jul-2018 08:00:00, 3.13e-01  
15-Jul-2018 09:00:00, 3.13e-01  
15-Jul-2018 10:00:00, 3.13e-01  
15-Jul-2018 11:00:00, 3.13e-01  
15-Jul-2018 12:00:00, 3.14e-01  
15-Jul-2018 13:00:00, 3.14e-01  
15-Jul-2018 14:00:00, 3.14e-01  
15-Jul-2018 15:00:00, 3.13e-01  
15-Jul-2018 16:00:00, 3.13e-01  
15-Jul-2018 17:00:00, 3.13e-01  
15-Jul-2018 18:00:00, 3.13e-01  
15-Jul-2018 19:00:00, 3.15e-01  
15-Jul-2018 20:00:00, 3.14e-01

15-Jul-2018 21:00:00, 3.14e-01  
15-Jul-2018 22:00:00, 3.14e-01  
15-Jul-2018 23:00:00, 3.14e-01  
16-Jul-2018, 3.14e-01  
16-Jul-2018 01:00:00, 3.14e-01  
16-Jul-2018 02:00:00, 3.14e-01  
16-Jul-2018 03:00:00, 3.14e-01  
16-Jul-2018 04:00:00, 3.15e-01  
16-Jul-2018 05:00:00, 3.15e-01  
16-Jul-2018 06:00:00, 3.15e-01  
16-Jul-2018 07:00:00, 3.15e-01  
16-Jul-2018 08:00:00, 3.15e-01  
16-Jul-2018 09:00:00, 3.13e-01  
16-Jul-2018 10:00:00, 3.13e-01  
16-Jul-2018 11:00:00, 3.13e-01  
16-Jul-2018 12:00:00, 3.13e-01  
16-Jul-2018 13:00:00, 3.13e-01  
16-Jul-2018 14:00:00, 3.13e-01  
16-Jul-2018 15:00:00, 3.13e-01  
16-Jul-2018 16:00:00, 3.13e-01  
16-Jul-2018 17:00:00, 3.13e-01  
16-Jul-2018 18:00:00, 3.13e-01  
16-Jul-2018 19:00:00, 3.13e-01  
16-Jul-2018 20:00:00, 3.15e-01  
16-Jul-2018 21:00:00, 3.15e-01  
16-Jul-2018 22:00:00, 3.15e-01  
16-Jul-2018 23:00:00, 3.15e-01  
17-Jul-2018, 3.15e-01  
17-Jul-2018 01:00:00, 3.15e-01  
17-Jul-2018 02:00:00, 3.15e-01  
17-Jul-2018 03:00:00, 3.15e-01  
17-Jul-2018 04:00:00, 3.15e-01  
17-Jul-2018 05:00:00, 3.15e-01  
17-Jul-2018 06:00:00, 3.15e-01  
17-Jul-2018 07:00:00, 3.15e-01  
17-Jul-2018 08:00:00, 3.15e-01  
17-Jul-2018 09:00:00, 3.14e-01  
17-Jul-2018 10:00:00, 3.13e-01  
17-Jul-2018 11:00:00, 3.13e-01  
17-Jul-2018 12:00:00, 3.13e-01  
17-Jul-2018 13:00:00, 3.13e-01  
17-Jul-2018 14:00:00, 3.13e-01  
17-Jul-2018 15:00:00, 3.12e-01  
17-Jul-2018 16:00:00, 3.12e-01  
17-Jul-2018 17:00:00, 3.12e-01  
17-Jul-2018 18:00:00, 3.12e-01  
17-Jul-2018 19:00:00, 3.15e-01  
17-Jul-2018 20:00:00, 3.14e-01  
17-Jul-2018 21:00:00, 3.13e-01  
17-Jul-2018 22:00:00, 3.13e-01  
17-Jul-2018 23:00:00, 3.13e-01  
18-Jul-2018, 3.13e-01  
18-Jul-2018 01:00:00, 3.13e-01  
18-Jul-2018 02:00:00, 3.14e-01  
18-Jul-2018 03:00:00, 3.14e-01  
18-Jul-2018 04:00:00, 3.14e-01  
18-Jul-2018 05:00:00, 3.14e-01  
18-Jul-2018 06:00:00, 3.14e-01  
18-Jul-2018 07:00:00, 3.14e-01  
18-Jul-2018 08:00:00, 3.14e-01  
18-Jul-2018 09:00:00, 3.13e-01  
18-Jul-2018 10:00:00, 3.12e-01  
18-Jul-2018 11:00:00, 3.12e-01  
18-Jul-2018 12:00:00, 3.12e-01

18-Jul-2018 13:00:00, 3.12e-01  
18-Jul-2018 14:00:00, 3.12e-01  
18-Jul-2018 15:00:00, 3.12e-01  
18-Jul-2018 16:00:00, 3.11e-01  
18-Jul-2018 17:00:00, 3.11e-01  
18-Jul-2018 18:00:00, 3.11e-01  
18-Jul-2018 19:00:00, 3.11e-01  
18-Jul-2018 20:00:00, 3.10e-01  
18-Jul-2018 21:00:00, 3.10e-01  
18-Jul-2018 22:00:00, 3.10e-01  
18-Jul-2018 23:00:00, 3.10e-01  
19-Jul-2018, 3.10e-01  
19-Jul-2018 01:00:00, 3.10e-01  
19-Jul-2018 02:00:00, 3.10e-01  
19-Jul-2018 03:00:00, 3.10e-01  
19-Jul-2018 04:00:00, 3.10e-01  
19-Jul-2018 05:00:00, 3.10e-01  
19-Jul-2018 06:00:00, 3.11e-01  
19-Jul-2018 07:00:00, 3.11e-01  
19-Jul-2018 08:00:00, 3.11e-01  
19-Jul-2018 09:00:00, 3.10e-01  
19-Jul-2018 10:00:00, 3.10e-01  
19-Jul-2018 11:00:00, 3.10e-01  
19-Jul-2018 12:00:00, 3.10e-01  
19-Jul-2018 13:00:00, 3.10e-01  
19-Jul-2018 14:00:00, 3.10e-01  
19-Jul-2018 15:00:00, 3.10e-01  
19-Jul-2018 16:00:00, 3.09e-01  
19-Jul-2018 17:00:00, 3.09e-01  
19-Jul-2018 18:00:00, 3.09e-01  
19-Jul-2018 19:00:00, 3.09e-01  
19-Jul-2018 20:00:00, 3.08e-01  
19-Jul-2018 21:00:00, 3.08e-01  
19-Jul-2018 22:00:00, 3.08e-01  
19-Jul-2018 23:00:00, 3.08e-01  
20-Jul-2018, 3.08e-01  
20-Jul-2018 01:00:00, 3.08e-01  
20-Jul-2018 02:00:00, 3.08e-01  
20-Jul-2018 03:00:00, 3.08e-01  
20-Jul-2018 04:00:00, 3.08e-01  
20-Jul-2018 05:00:00, 3.08e-01  
20-Jul-2018 06:00:00, 3.08e-01  
20-Jul-2018 07:00:00, 3.08e-01  
20-Jul-2018 08:00:00, 3.08e-01  
20-Jul-2018 09:00:00, 3.08e-01  
20-Jul-2018 10:00:00, 3.08e-01  
20-Jul-2018 11:00:00, 3.08e-01  
20-Jul-2018 12:00:00, 3.08e-01  
20-Jul-2018 13:00:00, 3.08e-01  
20-Jul-2018 14:00:00, 3.08e-01  
20-Jul-2018 15:00:00, 3.08e-01  
20-Jul-2018 16:00:00, 3.08e-01  
20-Jul-2018 17:00:00, 3.07e-01  
20-Jul-2018 18:00:00, 3.07e-01  
20-Jul-2018 19:00:00, 3.07e-01  
20-Jul-2018 20:00:00, 3.07e-01  
20-Jul-2018 21:00:00, 3.07e-01  
20-Jul-2018 22:00:00, 3.07e-01  
20-Jul-2018 23:00:00, 3.07e-01  
21-Jul-2018, 3.07e-01  
21-Jul-2018 01:00:00, 3.07e-01  
21-Jul-2018 02:00:00, 3.07e-01  
21-Jul-2018 03:00:00, 3.07e-01  
21-Jul-2018 04:00:00, 3.07e-01

21-Jul-2018 05:00:00, 3.07e-01  
21-Jul-2018 06:00:00, 3.07e-01  
21-Jul-2018 07:00:00, 3.08e-01  
21-Jul-2018 08:00:00, 3.08e-01  
21-Jul-2018 09:00:00, 3.07e-01  
21-Jul-2018 10:00:00, 3.07e-01  
21-Jul-2018 11:00:00, 3.07e-01  
21-Jul-2018 12:00:00, 3.07e-01  
21-Jul-2018 13:00:00, 3.07e-01  
21-Jul-2018 14:00:00, 3.07e-01  
21-Jul-2018 15:00:00, 3.06e-01  
21-Jul-2018 16:00:00, 3.06e-01  
21-Jul-2018 17:00:00, 3.06e-01  
21-Jul-2018 18:00:00, 3.06e-01  
21-Jul-2018 19:00:00, 3.06e-01  
21-Jul-2018 20:00:00, 3.06e-01  
21-Jul-2018 21:00:00, 3.06e-01  
21-Jul-2018 22:00:00, 3.06e-01  
21-Jul-2018 23:00:00, 3.06e-01  
22-Jul-2018, 3.05e-01  
22-Jul-2018 01:00:00, 3.05e-01  
22-Jul-2018 02:00:00, 3.05e-01  
22-Jul-2018 03:00:00, 3.05e-01  
22-Jul-2018 04:00:00, 3.05e-01  
22-Jul-2018 05:00:00, 3.06e-01  
22-Jul-2018 06:00:00, 3.06e-01  
22-Jul-2018 07:00:00, 3.05e-01  
22-Jul-2018 08:00:00, 3.06e-01  
22-Jul-2018 09:00:00, 3.06e-01  
22-Jul-2018 10:00:00, 3.06e-01  
22-Jul-2018 11:00:00, 3.05e-01  
22-Jul-2018 12:00:00, 3.05e-01  
22-Jul-2018 13:00:00, 3.05e-01  
22-Jul-2018 14:00:00, 3.05e-01  
22-Jul-2018 15:00:00, 3.04e-01  
22-Jul-2018 16:00:00, 3.04e-01  
22-Jul-2018 17:00:00, 3.04e-01  
22-Jul-2018 18:00:00, 3.04e-01  
22-Jul-2018 19:00:00, 3.04e-01  
22-Jul-2018 20:00:00, 3.05e-01  
22-Jul-2018 21:00:00, 3.04e-01  
22-Jul-2018 22:00:00, 3.04e-01  
22-Jul-2018 23:00:00, 3.04e-01  
23-Jul-2018, 3.05e-01  
23-Jul-2018 01:00:00, 3.05e-01  
23-Jul-2018 02:00:00, 3.05e-01  
23-Jul-2018 03:00:00, 3.05e-01  
23-Jul-2018 04:00:00, 3.05e-01  
23-Jul-2018 05:00:00, 3.05e-01  
23-Jul-2018 06:00:00, 3.06e-01  
23-Jul-2018 07:00:00, 3.06e-01  
23-Jul-2018 08:00:00, 3.05e-01  
23-Jul-2018 09:00:00, 3.03e-01  
23-Jul-2018 10:00:00, 3.03e-01  
23-Jul-2018 11:00:00, 3.03e-01  
23-Jul-2018 12:00:00, 3.03e-01  
23-Jul-2018 13:00:00, 3.03e-01  
23-Jul-2018 14:00:00, 3.03e-01  
23-Jul-2018 15:00:00, 3.03e-01  
23-Jul-2018 16:00:00, 3.02e-01  
23-Jul-2018 17:00:00, 3.02e-01  
23-Jul-2018 18:00:00, 3.02e-01  
23-Jul-2018 19:00:00, 3.02e-01  
23-Jul-2018 20:00:00, 3.02e-01



23-Jul-2018 21:00:00, 3.03e-01  
23-Jul-2018 22:00:00, 3.02e-01  
23-Jul-2018 23:00:00, 3.02e-01  
24-Jul-2018, 3.03e-01  
24-Jul-2018 01:00:00, 3.03e-01  
24-Jul-2018 02:00:00, 3.03e-01  
24-Jul-2018 03:00:00, 3.03e-01  
24-Jul-2018 04:00:00, 3.03e-01  
24-Jul-2018 05:00:00, 3.03e-01  
24-Jul-2018 06:00:00, 3.03e-01  
24-Jul-2018 07:00:00, 3.04e-01  
24-Jul-2018 08:00:00, 3.03e-01  
24-Jul-2018 09:00:00, 3.02e-01  
24-Jul-2018 10:00:00, 3.02e-01  
24-Jul-2018 11:00:00, 3.02e-01  
24-Jul-2018 12:00:00, 3.02e-01  
24-Jul-2018 13:00:00, 3.01e-01  
24-Jul-2018 14:00:00, 3.01e-01  
24-Jul-2018 15:00:00, 3.01e-01  
24-Jul-2018 16:00:00, 3.00e-01  
24-Jul-2018 17:00:00, 3.00e-01  
24-Jul-2018 18:00:00, 3.00e-01  
24-Jul-2018 19:00:00, 3.00e-01  
24-Jul-2018 20:00:00, 3.00e-01  
24-Jul-2018 21:00:00, 3.00e-01  
24-Jul-2018 22:00:00, 3.00e-01  
24-Jul-2018 23:00:00, 3.00e-01  
25-Jul-2018, 3.00e-01  
25-Jul-2018 01:00:00, 3.00e-01  
25-Jul-2018 02:00:00, 3.00e-01  
25-Jul-2018 03:00:00, 3.00e-01  
25-Jul-2018 04:00:00, 3.00e-01  
25-Jul-2018 05:00:00, 3.00e-01  
25-Jul-2018 06:00:00, 3.00e-01  
25-Jul-2018 07:00:00, 3.00e-01  
25-Jul-2018 08:00:00, 3.00e-01  
25-Jul-2018 09:00:00, 3.00e-01  
25-Jul-2018 10:00:00, 3.00e-01  
25-Jul-2018 11:00:00, 3.00e-01  
25-Jul-2018 12:00:00, 3.00e-01  
25-Jul-2018 13:00:00, 3.00e-01  
25-Jul-2018 14:00:00, 3.00e-01  
25-Jul-2018 15:00:00, 2.99e-01  
25-Jul-2018 16:00:00, 2.99e-01  
25-Jul-2018 17:00:00, 2.99e-01  
25-Jul-2018 18:00:00, 2.98e-01  
25-Jul-2018 19:00:00, 2.98e-01  
25-Jul-2018 20:00:00, 2.98e-01  
25-Jul-2018 21:00:00, 2.98e-01  
25-Jul-2018 22:00:00, 2.98e-01  
25-Jul-2018 23:00:00, 2.98e-01  
26-Jul-2018, 2.98e-01  
26-Jul-2018 01:00:00, 2.98e-01  
26-Jul-2018 02:00:00, 2.98e-01  
26-Jul-2018 03:00:00, 2.98e-01  
26-Jul-2018 04:00:00, 2.98e-01  
26-Jul-2018 05:00:00, 2.98e-01  
26-Jul-2018 06:00:00, 2.98e-01  
26-Jul-2018 07:00:00, 2.98e-01  
26-Jul-2018 08:00:00, 2.98e-01  
26-Jul-2018 09:00:00, 2.98e-01  
26-Jul-2018 10:00:00, 2.98e-01  
26-Jul-2018 11:00:00, 2.98e-01  
26-Jul-2018 12:00:00, 2.98e-01

26-Jul-2018 13:00:00, 2.98e-01  
26-Jul-2018 14:00:00, 2.98e-01  
26-Jul-2018 15:00:00, 2.97e-01  
26-Jul-2018 16:00:00, 2.97e-01  
26-Jul-2018 17:00:00, 2.97e-01  
26-Jul-2018 18:00:00, 2.97e-01  
26-Jul-2018 19:00:00, 2.96e-01  
26-Jul-2018 20:00:00, 2.96e-01  
26-Jul-2018 21:00:00, 2.96e-01  
26-Jul-2018 22:00:00, 2.96e-01  
26-Jul-2018 23:00:00, 2.96e-01  
27-Jul-2018, 2.96e-01  
27-Jul-2018 01:00:00, 2.96e-01  
27-Jul-2018 02:00:00, 2.96e-01  
27-Jul-2018 03:00:00, 2.96e-01  
27-Jul-2018 04:00:00, 2.96e-01  
27-Jul-2018 05:00:00, 2.96e-01  
27-Jul-2018 06:00:00, 2.96e-01  
27-Jul-2018 07:00:00, 2.96e-01  
27-Jul-2018 08:00:00, 2.96e-01  
27-Jul-2018 09:00:00, 2.96e-01  
27-Jul-2018 10:00:00, 2.96e-01  
27-Jul-2018 11:00:00, 2.96e-01  
27-Jul-2018 12:00:00, 2.95e-01  
27-Jul-2018 13:00:00, 2.95e-01  
27-Jul-2018 14:00:00, 2.95e-01  
27-Jul-2018 15:00:00, 2.95e-01  
27-Jul-2018 16:00:00, 2.95e-01  
27-Jul-2018 17:00:00, 2.95e-01  
27-Jul-2018 18:00:00, 2.95e-01  
27-Jul-2018 19:00:00, 2.94e-01  
27-Jul-2018 20:00:00, 2.94e-01  
27-Jul-2018 21:00:00, 2.94e-01  
27-Jul-2018 22:00:00, 2.94e-01  
27-Jul-2018 23:00:00, 2.94e-01  
28-Jul-2018, 2.94e-01  
28-Jul-2018 01:00:00, 2.94e-01  
28-Jul-2018 02:00:00, 2.94e-01  
28-Jul-2018 03:00:00, 2.94e-01  
28-Jul-2018 04:00:00, 2.94e-01  
28-Jul-2018 05:00:00, 2.94e-01  
28-Jul-2018 06:00:00, 2.94e-01  
28-Jul-2018 07:00:00, 2.94e-01  
28-Jul-2018 08:00:00, 2.94e-01  
28-Jul-2018 09:00:00, 2.94e-01  
28-Jul-2018 10:00:00, 2.94e-01  
28-Jul-2018 11:00:00, 2.94e-01  
28-Jul-2018 12:00:00, 2.94e-01  
28-Jul-2018 13:00:00, 2.94e-01  
28-Jul-2018 14:00:00, 2.94e-01  
28-Jul-2018 15:00:00, 2.94e-01  
28-Jul-2018 16:00:00, 2.94e-01  
28-Jul-2018 17:00:00, 2.93e-01  
28-Jul-2018 18:00:00, 2.93e-01  
28-Jul-2018 19:00:00, 2.95e-01  
28-Jul-2018 20:00:00, 2.95e-01  
28-Jul-2018 21:00:00, 2.95e-01  
28-Jul-2018 22:00:00, 2.95e-01  
28-Jul-2018 23:00:00, 2.95e-01  
29-Jul-2018, 2.95e-01  
29-Jul-2018 01:00:00, 2.95e-01  
29-Jul-2018 02:00:00, 2.95e-01  
29-Jul-2018 03:00:00, 2.96e-01  
29-Jul-2018 04:00:00, 2.96e-01

29-Jul-2018 05:00:00, 2.96e-01  
29-Jul-2018 06:00:00, 2.95e-01  
29-Jul-2018 07:00:00, 2.95e-01  
29-Jul-2018 08:00:00, 2.96e-01  
29-Jul-2018 09:00:00, 2.94e-01  
29-Jul-2018 10:00:00, 2.93e-01  
29-Jul-2018 11:00:00, 2.93e-01  
29-Jul-2018 12:00:00, 2.93e-01  
29-Jul-2018 13:00:00, 2.93e-01  
29-Jul-2018 14:00:00, 2.92e-01  
29-Jul-2018 15:00:00, 2.92e-01  
29-Jul-2018 16:00:00, 2.92e-01  
29-Jul-2018 17:00:00, 2.94e-01  
29-Jul-2018 18:00:00, 2.92e-01  
29-Jul-2018 19:00:00, 2.92e-01  
29-Jul-2018 20:00:00, 2.92e-01  
29-Jul-2018 21:00:00, 2.92e-01  
29-Jul-2018 22:00:00, 2.92e-01  
29-Jul-2018 23:00:00, 2.92e-01  
30-Jul-2018, 2.92e-01  
30-Jul-2018 01:00:00, 2.92e-01  
30-Jul-2018 02:00:00, 2.92e-01  
30-Jul-2018 03:00:00, 2.92e-01  
30-Jul-2018 04:00:00, 2.92e-01  
30-Jul-2018 05:00:00, 2.92e-01  
30-Jul-2018 06:00:00, 2.92e-01  
30-Jul-2018 07:00:00, 2.92e-01  
30-Jul-2018 08:00:00, 2.93e-01  
30-Jul-2018 09:00:00, 2.92e-01  
30-Jul-2018 10:00:00, 2.92e-01  
30-Jul-2018 11:00:00, 2.92e-01  
30-Jul-2018 12:00:00, 2.92e-01  
30-Jul-2018 13:00:00, 2.92e-01  
30-Jul-2018 14:00:00, 2.91e-01  
30-Jul-2018 15:00:00, 2.91e-01  
30-Jul-2018 16:00:00, 2.91e-01  
30-Jul-2018 17:00:00, 2.90e-01  
30-Jul-2018 18:00:00, 2.90e-01  
30-Jul-2018 19:00:00, 2.90e-01  
30-Jul-2018 20:00:00, 2.90e-01  
30-Jul-2018 21:00:00, 2.90e-01  
30-Jul-2018 22:00:00, 2.90e-01  
30-Jul-2018 23:00:00, 2.90e-01  
31-Jul-2018, 2.90e-01  
31-Jul-2018 01:00:00, 2.90e-01  
31-Jul-2018 02:00:00, 2.90e-01  
31-Jul-2018 03:00:00, 2.90e-01  
31-Jul-2018 04:00:00, 2.90e-01  
31-Jul-2018 05:00:00, 2.90e-01  
31-Jul-2018 06:00:00, 2.90e-01  
31-Jul-2018 07:00:00, 2.90e-01  
31-Jul-2018 08:00:00, 2.90e-01  
31-Jul-2018 09:00:00, 2.90e-01  
31-Jul-2018 10:00:00, 2.90e-01  
31-Jul-2018 11:00:00, 2.90e-01  
31-Jul-2018 12:00:00, 2.90e-01  
31-Jul-2018 13:00:00, 2.89e-01  
31-Jul-2018 14:00:00, 2.89e-01  
31-Jul-2018 15:00:00, 2.89e-01  
31-Jul-2018 16:00:00, 2.89e-01  
31-Jul-2018 17:00:00, 2.88e-01  
31-Jul-2018 18:00:00, 2.88e-01  
31-Jul-2018 19:00:00, 2.88e-01  
31-Jul-2018 20:00:00, 2.88e-01

31-Jul-2018 21:00:00, 2.88e-01  
31-Jul-2018 22:00:00, 2.88e-01  
31-Jul-2018 23:00:00, 2.88e-01  
01-Aug-2018, 2.88e-01  
01-Aug-2018 01:00:00, 2.88e-01  
01-Aug-2018 02:00:00, 2.88e-01  
01-Aug-2018 03:00:00, 2.88e-01  
01-Aug-2018 04:00:00, 2.88e-01  
01-Aug-2018 05:00:00, 2.88e-01  
01-Aug-2018 06:00:00, 2.88e-01  
01-Aug-2018 07:00:00, 2.88e-01  
01-Aug-2018 08:00:00, 2.88e-01  
01-Aug-2018 09:00:00, 2.88e-01  
01-Aug-2018 10:00:00, 2.88e-01  
01-Aug-2018 11:00:00, 2.88e-01  
01-Aug-2018 12:00:00, 2.88e-01  
01-Aug-2018 13:00:00, 2.87e-01  
01-Aug-2018 14:00:00, 2.87e-01  
01-Aug-2018 15:00:00, 2.87e-01  
01-Aug-2018 16:00:00, 2.87e-01  
01-Aug-2018 17:00:00, 2.87e-01  
01-Aug-2018 18:00:00, 2.86e-01  
01-Aug-2018 19:00:00, 2.86e-01  
01-Aug-2018 20:00:00, 2.86e-01  
01-Aug-2018 21:00:00, 2.86e-01  
01-Aug-2018 22:00:00, 2.86e-01  
01-Aug-2018 23:00:00, 2.86e-01  
02-Aug-2018, 2.86e-01  
02-Aug-2018 01:00:00, 2.86e-01  
02-Aug-2018 02:00:00, 2.86e-01  
02-Aug-2018 03:00:00, 2.86e-01  
02-Aug-2018 04:00:00, 2.86e-01  
02-Aug-2018 05:00:00, 2.86e-01  
02-Aug-2018 06:00:00, 2.86e-01  
02-Aug-2018 07:00:00, 2.86e-01  
02-Aug-2018 08:00:00, 2.86e-01  
02-Aug-2018 09:00:00, 2.86e-01  
02-Aug-2018 10:00:00, 2.86e-01  
02-Aug-2018 11:00:00, 2.86e-01  
02-Aug-2018 12:00:00, 2.86e-01  
02-Aug-2018 13:00:00, 2.86e-01  
02-Aug-2018 14:00:00, 2.85e-01  
02-Aug-2018 15:00:00, 2.85e-01  
02-Aug-2018 16:00:00, 2.85e-01  
02-Aug-2018 17:00:00, 2.84e-01  
02-Aug-2018 18:00:00, 2.84e-01  
02-Aug-2018 19:00:00, 2.84e-01  
02-Aug-2018 20:00:00, 2.84e-01  
02-Aug-2018 21:00:00, 2.84e-01  
02-Aug-2018 22:00:00, 2.84e-01  
02-Aug-2018 23:00:00, 2.84e-01  
03-Aug-2018, 2.84e-01  
03-Aug-2018 01:00:00, 2.84e-01  
03-Aug-2018 02:00:00, 2.84e-01  
03-Aug-2018 03:00:00, 2.84e-01  
03-Aug-2018 04:00:00, 2.84e-01  
03-Aug-2018 05:00:00, 2.84e-01  
03-Aug-2018 06:00:00, 2.84e-01  
03-Aug-2018 07:00:00, 2.84e-01  
03-Aug-2018 08:00:00, 2.84e-01  
03-Aug-2018 09:00:00, 2.84e-01  
03-Aug-2018 10:00:00, 2.83e-01  
03-Aug-2018 11:00:00, 2.84e-01  
03-Aug-2018 12:00:00, 2.84e-01

03-Aug-2018 13:00:00, 2.84e-01  
03-Aug-2018 14:00:00, 2.83e-01  
03-Aug-2018 15:00:00, 2.84e-01  
03-Aug-2018 16:00:00, 2.83e-01  
03-Aug-2018 17:00:00, 2.83e-01  
03-Aug-2018 18:00:00, 2.83e-01  
03-Aug-2018 19:00:00, 2.83e-01  
03-Aug-2018 20:00:00, 2.83e-01  
03-Aug-2018 21:00:00, 2.84e-01  
03-Aug-2018 22:00:00, 2.84e-01  
03-Aug-2018 23:00:00, 2.84e-01  
04-Aug-2018, 2.83e-01  
04-Aug-2018 01:00:00, 2.83e-01  
04-Aug-2018 02:00:00, 2.83e-01  
04-Aug-2018 03:00:00, 2.83e-01  
04-Aug-2018 04:00:00, 2.83e-01  
04-Aug-2018 05:00:00, 2.82e-01  
04-Aug-2018 06:00:00, 2.82e-01  
04-Aug-2018 07:00:00, 2.82e-01  
04-Aug-2018 08:00:00, 2.82e-01  
04-Aug-2018 09:00:00, 2.84e-01  
04-Aug-2018 10:00:00, 2.84e-01  
04-Aug-2018 11:00:00, 2.84e-01  
04-Aug-2018 12:00:00, 2.84e-01  
04-Aug-2018 13:00:00, 2.83e-01  
04-Aug-2018 14:00:00, 2.83e-01  
04-Aug-2018 15:00:00, 2.83e-01  
04-Aug-2018 16:00:00, 2.83e-01  
04-Aug-2018 17:00:00, 2.83e-01  
04-Aug-2018 18:00:00, 2.83e-01  
04-Aug-2018 19:00:00, 2.83e-01  
04-Aug-2018 20:00:00, 2.81e-01  
04-Aug-2018 21:00:00, 2.81e-01  
04-Aug-2018 22:00:00, 2.82e-01  
04-Aug-2018 23:00:00, 2.83e-01  
05-Aug-2018, 2.82e-01  
05-Aug-2018 01:00:00, 2.82e-01  
05-Aug-2018 02:00:00, 2.82e-01  
05-Aug-2018 03:00:00, 2.82e-01  
05-Aug-2018 04:00:00, 2.82e-01  
05-Aug-2018 05:00:00, 2.81e-01  
05-Aug-2018 06:00:00, 2.81e-01  
05-Aug-2018 07:00:00, 2.84e-01  
05-Aug-2018 08:00:00, 2.85e-01  
05-Aug-2018 09:00:00, 2.85e-01  
05-Aug-2018 10:00:00, 2.82e-01  
05-Aug-2018 11:00:00, 2.82e-01  
05-Aug-2018 12:00:00, 2.82e-01  
05-Aug-2018 13:00:00, 2.82e-01  
05-Aug-2018 14:00:00, 2.82e-01  
05-Aug-2018 15:00:00, 2.81e-01  
05-Aug-2018 16:00:00, 2.81e-01  
05-Aug-2018 17:00:00, 2.81e-01  
05-Aug-2018 18:00:00, 2.80e-01  
05-Aug-2018 19:00:00, 2.80e-01  
05-Aug-2018 20:00:00, 2.80e-01  
05-Aug-2018 21:00:00, 2.80e-01  
05-Aug-2018 22:00:00, 2.80e-01  
05-Aug-2018 23:00:00, 2.80e-01  
06-Aug-2018, 2.80e-01  
06-Aug-2018 01:00:00, 2.81e-01  
06-Aug-2018 02:00:00, 2.81e-01  
06-Aug-2018 03:00:00, 2.81e-01  
06-Aug-2018 04:00:00, 2.80e-01

06-Aug-2018 05:00:00, 2.80e-01  
06-Aug-2018 06:00:00, 2.80e-01  
06-Aug-2018 07:00:00, 2.80e-01  
06-Aug-2018 08:00:00, 2.80e-01  
06-Aug-2018 09:00:00, 2.81e-01  
06-Aug-2018 10:00:00, 2.81e-01  
06-Aug-2018 11:00:00, 2.81e-01  
06-Aug-2018 12:00:00, 2.80e-01  
06-Aug-2018 13:00:00, 2.80e-01  
06-Aug-2018 14:00:00, 2.80e-01  
06-Aug-2018 15:00:00, 2.79e-01  
06-Aug-2018 16:00:00, 2.79e-01  
06-Aug-2018 17:00:00, 2.79e-01  
06-Aug-2018 18:00:00, 2.79e-01  
06-Aug-2018 19:00:00, 2.79e-01  
06-Aug-2018 20:00:00, 2.78e-01  
06-Aug-2018 21:00:00, 2.78e-01  
06-Aug-2018 22:00:00, 2.78e-01  
06-Aug-2018 23:00:00, 2.78e-01  
07-Aug-2018, 2.78e-01  
07-Aug-2018 01:00:00, 2.79e-01  
07-Aug-2018 02:00:00, 2.79e-01  
07-Aug-2018 03:00:00, 2.79e-01  
07-Aug-2018 04:00:00, 2.79e-01  
07-Aug-2018 05:00:00, 2.79e-01  
07-Aug-2018 06:00:00, 2.79e-01  
07-Aug-2018 07:00:00, 2.79e-01  
07-Aug-2018 08:00:00, 2.79e-01  
07-Aug-2018 09:00:00, 2.79e-01  
07-Aug-2018 10:00:00, 2.78e-01  
07-Aug-2018 11:00:00, 2.78e-01  
07-Aug-2018 12:00:00, 2.78e-01  
07-Aug-2018 13:00:00, 2.78e-01  
07-Aug-2018 14:00:00, 2.78e-01  
07-Aug-2018 15:00:00, 2.77e-01  
07-Aug-2018 16:00:00, 2.77e-01  
07-Aug-2018 17:00:00, 2.76e-01  
07-Aug-2018 18:00:00, 2.76e-01  
07-Aug-2018 19:00:00, 2.76e-01  
07-Aug-2018 20:00:00, 2.76e-01  
07-Aug-2018 21:00:00, 2.76e-01  
07-Aug-2018 22:00:00, 2.76e-01  
07-Aug-2018 23:00:00, 2.76e-01  
08-Aug-2018, 2.76e-01  
08-Aug-2018 01:00:00, 2.76e-01  
08-Aug-2018 02:00:00, 2.76e-01  
08-Aug-2018 03:00:00, 2.76e-01  
08-Aug-2018 04:00:00, 2.76e-01  
08-Aug-2018 05:00:00, 2.77e-01  
08-Aug-2018 06:00:00, 2.77e-01  
08-Aug-2018 07:00:00, 2.77e-01  
08-Aug-2018 08:00:00, 2.76e-01  
08-Aug-2018 09:00:00, 2.76e-01  
08-Aug-2018 10:00:00, 2.76e-01  
08-Aug-2018 11:00:00, 2.76e-01  
08-Aug-2018 12:00:00, 2.75e-01  
08-Aug-2018 13:00:00, 2.75e-01  
08-Aug-2018 14:00:00, 2.75e-01  
08-Aug-2018 15:00:00, 2.75e-01  
08-Aug-2018 16:00:00, 2.74e-01  
08-Aug-2018 17:00:00, 2.74e-01  
08-Aug-2018 18:00:00, 2.74e-01  
08-Aug-2018 19:00:00, 2.73e-01  
08-Aug-2018 20:00:00, 2.73e-01

08-Aug-2018 21:00:00, 2.73e-01  
08-Aug-2018 22:00:00, 2.73e-01  
08-Aug-2018 23:00:00, 2.74e-01  
09-Aug-2018, 2.74e-01  
09-Aug-2018 01:00:00, 2.74e-01  
09-Aug-2018 02:00:00, 2.74e-01  
09-Aug-2018 03:00:00, 2.74e-01  
09-Aug-2018 04:00:00, 2.74e-01  
09-Aug-2018 05:00:00, 2.74e-01  
09-Aug-2018 06:00:00, 2.74e-01  
09-Aug-2018 07:00:00, 2.74e-01  
09-Aug-2018 08:00:00, 2.74e-01  
09-Aug-2018 09:00:00, 2.74e-01  
09-Aug-2018 10:00:00, 2.73e-01  
09-Aug-2018 11:00:00, 2.73e-01  
09-Aug-2018 12:00:00, 2.73e-01  
09-Aug-2018 13:00:00, 2.72e-01  
09-Aug-2018 14:00:00, 2.72e-01  
09-Aug-2018 15:00:00, 2.72e-01  
09-Aug-2018 16:00:00, 2.71e-01  
09-Aug-2018 17:00:00, 2.71e-01  
09-Aug-2018 18:00:00, 2.71e-01  
09-Aug-2018 19:00:00, 2.71e-01  
09-Aug-2018 20:00:00, 2.71e-01  
09-Aug-2018 21:00:00, 2.71e-01  
09-Aug-2018 22:00:00, 2.71e-01  
09-Aug-2018 23:00:00, 2.71e-01  
10-Aug-2018, 2.71e-01  
10-Aug-2018 01:00:00, 2.72e-01  
10-Aug-2018 02:00:00, 2.72e-01  
10-Aug-2018 03:00:00, 2.72e-01  
10-Aug-2018 04:00:00, 2.72e-01  
10-Aug-2018 05:00:00, 2.71e-01  
10-Aug-2018 06:00:00, 2.71e-01  
10-Aug-2018 07:00:00, 2.71e-01  
10-Aug-2018 08:00:00, 2.71e-01  
10-Aug-2018 09:00:00, 2.72e-01  
10-Aug-2018 10:00:00, 2.72e-01  
10-Aug-2018 11:00:00, 2.71e-01  
10-Aug-2018 12:00:00, 2.71e-01  
10-Aug-2018 13:00:00, 2.71e-01  
10-Aug-2018 14:00:00, 2.71e-01  
10-Aug-2018 15:00:00, 2.70e-01  
10-Aug-2018 16:00:00, 2.71e-01  
10-Aug-2018 17:00:00, 2.71e-01  
10-Aug-2018 18:00:00, 2.70e-01  
10-Aug-2018 19:00:00, 2.70e-01  
10-Aug-2018 20:00:00, 2.71e-01  
10-Aug-2018 21:00:00, 2.71e-01  
10-Aug-2018 22:00:00, 2.71e-01  
10-Aug-2018 23:00:00, 2.71e-01  
11-Aug-2018, 2.71e-01  
11-Aug-2018 01:00:00, 2.71e-01  
11-Aug-2018 02:00:00, 2.71e-01  
11-Aug-2018 03:00:00, 2.71e-01  
11-Aug-2018 04:00:00, 2.71e-01  
11-Aug-2018 05:00:00, 2.71e-01  
11-Aug-2018 06:00:00, 2.71e-01  
11-Aug-2018 07:00:00, 2.71e-01  
11-Aug-2018 08:00:00, 2.69e-01  
11-Aug-2018 09:00:00, 2.71e-01  
11-Aug-2018 10:00:00, 2.71e-01  
11-Aug-2018 11:00:00, 2.71e-01  
11-Aug-2018 12:00:00, 2.71e-01

11-Aug-2018 13:00:00, 2.70e-01  
11-Aug-2018 14:00:00, 2.70e-01  
11-Aug-2018 15:00:00, 2.69e-01  
11-Aug-2018 16:00:00, 2.69e-01  
11-Aug-2018 17:00:00, 2.69e-01  
11-Aug-2018 18:00:00, 2.69e-01  
11-Aug-2018 19:00:00, 2.69e-01  
11-Aug-2018 20:00:00, 2.69e-01  
11-Aug-2018 21:00:00, 2.69e-01  
11-Aug-2018 22:00:00, 2.69e-01  
11-Aug-2018 23:00:00, 2.69e-01  
12-Aug-2018, 2.70e-01  
12-Aug-2018 01:00:00, 2.70e-01  
12-Aug-2018 02:00:00, 2.70e-01  
12-Aug-2018 03:00:00, 2.70e-01  
12-Aug-2018 04:00:00, 2.70e-01  
12-Aug-2018 05:00:00, 2.70e-01  
12-Aug-2018 06:00:00, 2.70e-01  
12-Aug-2018 07:00:00, 2.70e-01  
12-Aug-2018 08:00:00, 2.70e-01  
12-Aug-2018 09:00:00, 2.70e-01  
12-Aug-2018 10:00:00, 2.69e-01  
12-Aug-2018 11:00:00, 2.69e-01  
12-Aug-2018 12:00:00, 2.69e-01  
12-Aug-2018 13:00:00, 2.69e-01  
12-Aug-2018 14:00:00, 2.68e-01  
12-Aug-2018 15:00:00, 2.68e-01  
12-Aug-2018 16:00:00, 2.68e-01  
12-Aug-2018 17:00:00, 2.67e-01  
12-Aug-2018 18:00:00, 2.67e-01  
12-Aug-2018 19:00:00, 2.67e-01  
12-Aug-2018 20:00:00, 2.67e-01  
12-Aug-2018 21:00:00, 2.67e-01  
12-Aug-2018 22:00:00, 2.67e-01  
12-Aug-2018 23:00:00, 2.67e-01  
13-Aug-2018, 2.67e-01  
13-Aug-2018 01:00:00, 2.68e-01  
13-Aug-2018 02:00:00, 2.68e-01  
13-Aug-2018 03:00:00, 2.67e-01  
13-Aug-2018 04:00:00, 2.68e-01  
13-Aug-2018 05:00:00, 2.68e-01  
13-Aug-2018 06:00:00, 2.68e-01  
13-Aug-2018 07:00:00, 2.68e-01  
13-Aug-2018 08:00:00, 2.67e-01  
13-Aug-2018 09:00:00, 2.68e-01  
13-Aug-2018 10:00:00, 2.68e-01  
13-Aug-2018 11:00:00, 2.67e-01  
13-Aug-2018 12:00:00, 2.67e-01  
13-Aug-2018 13:00:00, 2.67e-01  
13-Aug-2018 14:00:00, 2.66e-01  
13-Aug-2018 15:00:00, 2.66e-01  
13-Aug-2018 16:00:00, 2.66e-01  
13-Aug-2018 17:00:00, 2.65e-01  
13-Aug-2018 18:00:00, 2.65e-01  
13-Aug-2018 19:00:00, 2.65e-01  
13-Aug-2018 20:00:00, 2.65e-01  
13-Aug-2018 21:00:00, 2.65e-01  
13-Aug-2018 22:00:00, 2.65e-01  
13-Aug-2018 23:00:00, 2.65e-01  
14-Aug-2018, 2.65e-01  
14-Aug-2018 01:00:00, 2.65e-01  
14-Aug-2018 02:00:00, 2.65e-01  
14-Aug-2018 03:00:00, 2.66e-01  
14-Aug-2018 04:00:00, 2.66e-01



14-Aug-2018 05:00:00, 2.66e-01  
14-Aug-2018 06:00:00, 2.65e-01  
14-Aug-2018 07:00:00, 2.66e-01  
14-Aug-2018 08:00:00, 2.65e-01  
14-Aug-2018 09:00:00, 2.66e-01  
14-Aug-2018 10:00:00, 2.65e-01  
14-Aug-2018 11:00:00, 2.65e-01  
14-Aug-2018 12:00:00, 2.65e-01  
14-Aug-2018 13:00:00, 2.65e-01  
14-Aug-2018 14:00:00, 2.64e-01  
14-Aug-2018 15:00:00, 2.64e-01  
14-Aug-2018 16:00:00, 2.64e-01  
14-Aug-2018 17:00:00, 2.63e-01  
14-Aug-2018 18:00:00, 2.63e-01  
14-Aug-2018 19:00:00, 2.63e-01  
14-Aug-2018 20:00:00, 2.63e-01  
14-Aug-2018 21:00:00, 2.63e-01  
14-Aug-2018 22:00:00, 2.63e-01  
14-Aug-2018 23:00:00, 2.63e-01  
15-Aug-2018, 2.63e-01  
15-Aug-2018 01:00:00, 2.63e-01  
15-Aug-2018 02:00:00, 2.63e-01  
15-Aug-2018 03:00:00, 2.63e-01  
15-Aug-2018 04:00:00, 2.64e-01  
15-Aug-2018 05:00:00, 2.64e-01  
15-Aug-2018 06:00:00, 2.64e-01  
15-Aug-2018 07:00:00, 2.64e-01  
15-Aug-2018 08:00:00, 2.64e-01  
15-Aug-2018 09:00:00, 2.63e-01  
15-Aug-2018 10:00:00, 2.63e-01  
15-Aug-2018 11:00:00, 2.63e-01  
15-Aug-2018 12:00:00, 2.63e-01  
15-Aug-2018 13:00:00, 2.63e-01  
15-Aug-2018 14:00:00, 2.62e-01  
15-Aug-2018 15:00:00, 2.62e-01  
15-Aug-2018 16:00:00, 2.62e-01  
15-Aug-2018 17:00:00, 2.61e-01  
15-Aug-2018 18:00:00, 2.61e-01  
15-Aug-2018 19:00:00, 2.61e-01  
15-Aug-2018 20:00:00, 2.61e-01  
15-Aug-2018 21:00:00, 2.61e-01  
15-Aug-2018 22:00:00, 2.61e-01  
15-Aug-2018 23:00:00, 2.61e-01  
16-Aug-2018, 2.61e-01  
16-Aug-2018 01:00:00, 2.61e-01  
16-Aug-2018 02:00:00, 2.62e-01  
16-Aug-2018 03:00:00, 2.62e-01  
16-Aug-2018 04:00:00, 2.62e-01  
16-Aug-2018 05:00:00, 2.62e-01  
16-Aug-2018 06:00:00, 2.62e-01  
16-Aug-2018 07:00:00, 2.62e-01  
16-Aug-2018 08:00:00, 2.62e-01  
16-Aug-2018 09:00:00, 2.62e-01  
16-Aug-2018 10:00:00, 2.62e-01  
16-Aug-2018 11:00:00, 2.62e-01  
16-Aug-2018 12:00:00, 2.61e-01  
16-Aug-2018 13:00:00, 2.61e-01  
16-Aug-2018 14:00:00, 2.61e-01  
16-Aug-2018 15:00:00, 2.64e-01  
16-Aug-2018 16:00:00, 2.61e-01  
16-Aug-2018 17:00:00, 2.58e-01  
16-Aug-2018 18:00:00, 2.65e-01  
16-Aug-2018 19:00:00, 2.61e-01  
16-Aug-2018 20:00:00, 2.59e-01

16-Aug-2018 21:00:00, 2.59e-01  
16-Aug-2018 22:00:00, 2.64e-01  
16-Aug-2018 23:00:00, 2.65e-01  
17-Aug-2018, 2.64e-01  
17-Aug-2018 01:00:00, 2.64e-01  
17-Aug-2018 02:00:00, 2.64e-01  
17-Aug-2018 03:00:00, 2.65e-01  
17-Aug-2018 04:00:00, 2.65e-01  
17-Aug-2018 05:00:00, 2.65e-01  
17-Aug-2018 06:00:00, 2.65e-01  
17-Aug-2018 07:00:00, 2.66e-01  
17-Aug-2018 08:00:00, 2.65e-01  
17-Aug-2018 09:00:00, 2.62e-01  
17-Aug-2018 10:00:00, 2.59e-01  
17-Aug-2018 11:00:00, 2.59e-01  
17-Aug-2018 12:00:00, 2.59e-01  
17-Aug-2018 13:00:00, 2.59e-01  
17-Aug-2018 14:00:00, 2.59e-01  
17-Aug-2018 15:00:00, 2.58e-01  
17-Aug-2018 16:00:00, 2.58e-01  
17-Aug-2018 17:00:00, 2.59e-01  
17-Aug-2018 18:00:00, 2.59e-01  
17-Aug-2018 19:00:00, 2.59e-01  
17-Aug-2018 20:00:00, 2.59e-01  
17-Aug-2018 21:00:00, 2.59e-01  
17-Aug-2018 22:00:00, 2.59e-01  
17-Aug-2018 23:00:00, 2.59e-01  
18-Aug-2018, 2.59e-01  
18-Aug-2018 01:00:00, 2.59e-01  
18-Aug-2018 02:00:00, 2.58e-01  
18-Aug-2018 03:00:00, 2.58e-01  
18-Aug-2018 04:00:00, 2.58e-01  
18-Aug-2018 05:00:00, 2.58e-01  
18-Aug-2018 06:00:00, 2.59e-01  
18-Aug-2018 07:00:00, 2.59e-01  
18-Aug-2018 08:00:00, 2.61e-01  
18-Aug-2018 09:00:00, 2.65e-01  
18-Aug-2018 10:00:00, 2.67e-01  
18-Aug-2018 11:00:00, 2.66e-01  
18-Aug-2018 12:00:00, 2.61e-01  
18-Aug-2018 13:00:00, 2.59e-01  
18-Aug-2018 14:00:00, 2.59e-01  
18-Aug-2018 15:00:00, 2.59e-01  
18-Aug-2018 16:00:00, 2.59e-01  
18-Aug-2018 17:00:00, 2.59e-01  
18-Aug-2018 18:00:00, 2.59e-01  
18-Aug-2018 19:00:00, 2.59e-01  
18-Aug-2018 20:00:00, 2.59e-01  
18-Aug-2018 21:00:00, 2.59e-01  
18-Aug-2018 22:00:00, 2.59e-01  
18-Aug-2018 23:00:00, 2.58e-01  
19-Aug-2018, 2.58e-01  
19-Aug-2018 01:00:00, 2.58e-01  
19-Aug-2018 02:00:00, 2.58e-01  
19-Aug-2018 03:00:00, 2.59e-01  
19-Aug-2018 04:00:00, 2.59e-01  
19-Aug-2018 05:00:00, 2.58e-01  
19-Aug-2018 06:00:00, 2.58e-01  
19-Aug-2018 07:00:00, 2.59e-01  
19-Aug-2018 08:00:00, 2.59e-01  
19-Aug-2018 09:00:00, 2.59e-01  
19-Aug-2018 10:00:00, 2.59e-01  
19-Aug-2018 11:00:00, 2.59e-01  
19-Aug-2018 12:00:00, 2.59e-01

19-Aug-2018 13:00:00, 2.59e-01  
19-Aug-2018 14:00:00, 2.59e-01  
19-Aug-2018 15:00:00, 2.59e-01  
19-Aug-2018 16:00:00, 2.59e-01  
19-Aug-2018 17:00:00, 2.59e-01  
19-Aug-2018 18:00:00, 2.59e-01  
19-Aug-2018 19:00:00, 2.59e-01  
19-Aug-2018 20:00:00, 2.59e-01  
19-Aug-2018 21:00:00, 2.59e-01  
19-Aug-2018 22:00:00, 2.59e-01  
19-Aug-2018 23:00:00, 2.59e-01  
20-Aug-2018, 2.59e-01  
20-Aug-2018 01:00:00, 2.59e-01  
20-Aug-2018 02:00:00, 2.58e-01  
20-Aug-2018 03:00:00, 2.59e-01  
20-Aug-2018 04:00:00, 2.59e-01  
20-Aug-2018 05:00:00, 2.59e-01  
20-Aug-2018 06:00:00, 2.59e-01  
20-Aug-2018 07:00:00, 2.59e-01  
20-Aug-2018 08:00:00, 2.58e-01  
20-Aug-2018 09:00:00, 2.59e-01  
20-Aug-2018 10:00:00, 2.60e-01  
20-Aug-2018 11:00:00, 2.60e-01  
20-Aug-2018 12:00:00, 2.60e-01  
20-Aug-2018 13:00:00, 2.59e-01  
20-Aug-2018 14:00:00, 2.59e-01  
20-Aug-2018 15:00:00, 2.59e-01  
20-Aug-2018 16:00:00, 2.59e-01  
20-Aug-2018 17:00:00, 2.59e-01  
20-Aug-2018 18:00:00, 2.59e-01  
20-Aug-2018 19:00:00, 2.59e-01  
20-Aug-2018 20:00:00, 2.59e-01  
20-Aug-2018 21:00:00, 2.59e-01  
20-Aug-2018 22:00:00, 2.59e-01  
20-Aug-2018 23:00:00, 2.59e-01  
21-Aug-2018, 2.59e-01  
21-Aug-2018 01:00:00, 2.60e-01  
21-Aug-2018 02:00:00, 2.60e-01  
21-Aug-2018 03:00:00, 2.60e-01  
21-Aug-2018 04:00:00, 2.60e-01  
21-Aug-2018 05:00:00, 2.60e-01  
21-Aug-2018 06:00:00, 2.60e-01  
21-Aug-2018 07:00:00, 2.59e-01  
21-Aug-2018 08:00:00, 2.60e-01  
21-Aug-2018 09:00:00, 2.58e-01  
21-Aug-2018 10:00:00, 2.60e-01  
21-Aug-2018 11:00:00, 2.60e-01  
21-Aug-2018 12:00:00, 2.59e-01  
21-Aug-2018 13:00:00, 2.59e-01  
21-Aug-2018 14:00:00, 2.59e-01  
21-Aug-2018 15:00:00, 2.58e-01  
21-Aug-2018 16:00:00, 2.59e-01  
21-Aug-2018 17:00:00, 2.59e-01  
21-Aug-2018 18:00:00, 2.60e-01  
21-Aug-2018 19:00:00, 2.63e-01  
21-Aug-2018 20:00:00, 2.65e-01  
21-Aug-2018 21:00:00, 2.65e-01  
21-Aug-2018 22:00:00, 2.65e-01  
21-Aug-2018 23:00:00, 2.65e-01  
22-Aug-2018, 2.65e-01  
22-Aug-2018 01:00:00, 2.66e-01  
22-Aug-2018 02:00:00, 2.66e-01  
22-Aug-2018 03:00:00, 2.66e-01  
22-Aug-2018 04:00:00, 2.66e-01

22-Aug-2018 05:00:00, 2.66e-01  
22-Aug-2018 06:00:00, 2.66e-01  
22-Aug-2018 07:00:00, 2.66e-01  
22-Aug-2018 08:00:00, 2.67e-01  
22-Aug-2018 09:00:00, 2.66e-01  
22-Aug-2018 10:00:00, 2.63e-01  
22-Aug-2018 11:00:00, 2.60e-01  
22-Aug-2018 12:00:00, 2.60e-01  
22-Aug-2018 13:00:00, 2.60e-01  
22-Aug-2018 14:00:00, 2.60e-01  
22-Aug-2018 15:00:00, 2.60e-01  
22-Aug-2018 16:00:00, 2.60e-01  
22-Aug-2018 17:00:00, 2.59e-01  
22-Aug-2018 18:00:00, 2.59e-01  
22-Aug-2018 19:00:00, 2.63e-01  
22-Aug-2018 20:00:00, 2.64e-01  
22-Aug-2018 21:00:00, 2.64e-01  
22-Aug-2018 22:00:00, 2.64e-01  
22-Aug-2018 23:00:00, 2.64e-01  
23-Aug-2018, 2.64e-01  
23-Aug-2018 01:00:00, 2.64e-01  
23-Aug-2018 02:00:00, 2.64e-01  
23-Aug-2018 03:00:00, 2.64e-01  
23-Aug-2018 04:00:00, 2.64e-01  
23-Aug-2018 05:00:00, 2.66e-01  
23-Aug-2018 06:00:00, 2.67e-01  
23-Aug-2018 07:00:00, 2.67e-01  
23-Aug-2018 08:00:00, 2.65e-01  
23-Aug-2018 09:00:00, 2.66e-01  
23-Aug-2018 10:00:00, 2.62e-01  
23-Aug-2018 11:00:00, 2.60e-01  
23-Aug-2018 12:00:00, 2.60e-01  
23-Aug-2018 13:00:00, 2.60e-01  
23-Aug-2018 14:00:00, 2.60e-01  
23-Aug-2018 15:00:00, 2.59e-01  
23-Aug-2018 16:00:00, 2.59e-01  
23-Aug-2018 17:00:00, 2.59e-01  
23-Aug-2018 18:00:00, 2.60e-01  
23-Aug-2018 19:00:00, 2.59e-01  
23-Aug-2018 20:00:00, 2.59e-01  
23-Aug-2018 21:00:00, 2.59e-01  
23-Aug-2018 22:00:00, 2.59e-01  
23-Aug-2018 23:00:00, 2.58e-01  
24-Aug-2018, 2.59e-01  
24-Aug-2018 01:00:00, 2.59e-01  
24-Aug-2018 02:00:00, 2.59e-01  
24-Aug-2018 03:00:00, 2.59e-01  
24-Aug-2018 04:00:00, 2.59e-01  
24-Aug-2018 05:00:00, 2.59e-01  
24-Aug-2018 06:00:00, 2.59e-01  
24-Aug-2018 07:00:00, 2.59e-01  
24-Aug-2018 08:00:00, 2.61e-01  
24-Aug-2018 09:00:00, 2.60e-01  
24-Aug-2018 10:00:00, 2.60e-01  
24-Aug-2018 11:00:00, 2.60e-01  
24-Aug-2018 12:00:00, 2.59e-01  
24-Aug-2018 13:00:00, 2.59e-01  
24-Aug-2018 14:00:00, 2.59e-01  
24-Aug-2018 15:00:00, 2.59e-01  
24-Aug-2018 16:00:00, 2.59e-01  
24-Aug-2018 17:00:00, 2.58e-01  
24-Aug-2018 18:00:00, 2.58e-01  
24-Aug-2018 19:00:00, 2.58e-01  
24-Aug-2018 20:00:00, 2.58e-01

24-Aug-2018 21:00:00, 2.58e-01  
24-Aug-2018 22:00:00, 2.58e-01  
24-Aug-2018 23:00:00, 2.58e-01  
25-Aug-2018, 2.58e-01  
25-Aug-2018 01:00:00, 2.59e-01  
25-Aug-2018 02:00:00, 2.59e-01  
25-Aug-2018 03:00:00, 2.59e-01  
25-Aug-2018 04:00:00, 2.59e-01  
25-Aug-2018 05:00:00, 2.58e-01  
25-Aug-2018 06:00:00, 2.58e-01  
25-Aug-2018 07:00:00, 2.59e-01  
25-Aug-2018 08:00:00, 2.59e-01  
25-Aug-2018 09:00:00, 2.59e-01  
25-Aug-2018 10:00:00, 2.60e-01  
25-Aug-2018 11:00:00, 2.60e-01  
25-Aug-2018 12:00:00, 2.59e-01  
25-Aug-2018 13:00:00, 2.59e-01  
25-Aug-2018 14:00:00, 2.59e-01  
25-Aug-2018 15:00:00, 2.59e-01  
25-Aug-2018 16:00:00, 2.59e-01  
25-Aug-2018 17:00:00, 2.59e-01  
25-Aug-2018 18:00:00, 2.59e-01  
25-Aug-2018 19:00:00, 2.59e-01  
25-Aug-2018 20:00:00, 2.59e-01  
25-Aug-2018 21:00:00, 2.59e-01  
25-Aug-2018 22:00:00, 2.59e-01  
25-Aug-2018 23:00:00, 2.59e-01  
26-Aug-2018, 2.59e-01  
26-Aug-2018 01:00:00, 2.59e-01  
26-Aug-2018 02:00:00, 2.59e-01  
26-Aug-2018 03:00:00, 2.59e-01  
26-Aug-2018 04:00:00, 2.59e-01  
26-Aug-2018 05:00:00, 2.59e-01  
26-Aug-2018 06:00:00, 2.59e-01  
26-Aug-2018 07:00:00, 2.59e-01  
26-Aug-2018 08:00:00, 2.59e-01  
26-Aug-2018 09:00:00, 2.60e-01  
26-Aug-2018 10:00:00, 2.60e-01  
26-Aug-2018 11:00:00, 2.60e-01  
26-Aug-2018 12:00:00, 2.59e-01  
26-Aug-2018 13:00:00, 2.59e-01  
26-Aug-2018 14:00:00, 2.59e-01  
26-Aug-2018 15:00:00, 2.59e-01  
26-Aug-2018 16:00:00, 2.59e-01  
26-Aug-2018 17:00:00, 2.59e-01  
26-Aug-2018 18:00:00, 2.63e-01  
26-Aug-2018 19:00:00, 2.65e-01  
26-Aug-2018 20:00:00, 2.64e-01  
26-Aug-2018 21:00:00, 2.64e-01  
26-Aug-2018 22:00:00, 2.67e-01  
26-Aug-2018 23:00:00, 2.66e-01  
27-Aug-2018, 2.65e-01  
27-Aug-2018 01:00:00, 2.65e-01  
27-Aug-2018 02:00:00, 2.65e-01  
27-Aug-2018 03:00:00, 2.65e-01  
27-Aug-2018 04:00:00, 2.66e-01  
27-Aug-2018 05:00:00, 2.66e-01  
27-Aug-2018 06:00:00, 2.66e-01  
27-Aug-2018 07:00:00, 2.66e-01  
27-Aug-2018 08:00:00, 2.65e-01  
27-Aug-2018 09:00:00, 2.65e-01  
27-Aug-2018 10:00:00, 2.63e-01  
27-Aug-2018 11:00:00, 2.60e-01  
27-Aug-2018 12:00:00, 2.59e-01

27-Aug-2018 13:00:00, 2.59e-01  
27-Aug-2018 14:00:00, 2.59e-01  
27-Aug-2018 15:00:00, 2.59e-01  
27-Aug-2018 16:00:00, 2.59e-01  
27-Aug-2018 17:00:00, 2.58e-01  
27-Aug-2018 18:00:00, 2.58e-01  
27-Aug-2018 19:00:00, 2.58e-01  
27-Aug-2018 20:00:00, 2.58e-01  
27-Aug-2018 21:00:00, 2.58e-01  
27-Aug-2018 22:00:00, 2.58e-01  
27-Aug-2018 23:00:00, 2.58e-01  
28-Aug-2018, 2.58e-01  
28-Aug-2018 01:00:00, 2.58e-01  
28-Aug-2018 02:00:00, 2.58e-01  
28-Aug-2018 03:00:00, 2.58e-01  
28-Aug-2018 04:00:00, 2.58e-01  
28-Aug-2018 05:00:00, 2.58e-01  
28-Aug-2018 06:00:00, 2.58e-01  
28-Aug-2018 07:00:00, 2.58e-01  
28-Aug-2018 08:00:00, 2.59e-01  
28-Aug-2018 09:00:00, 2.59e-01  
28-Aug-2018 10:00:00, 2.59e-01  
28-Aug-2018 11:00:00, 2.59e-01  
28-Aug-2018 12:00:00, 2.59e-01  
28-Aug-2018 13:00:00, 2.59e-01  
28-Aug-2018 14:00:00, 2.58e-01  
28-Aug-2018 15:00:00, 2.58e-01  
28-Aug-2018 16:00:00, 2.58e-01  
28-Aug-2018 17:00:00, 2.58e-01  
28-Aug-2018 18:00:00, 2.58e-01  
28-Aug-2018 19:00:00, 2.58e-01  
28-Aug-2018 20:00:00, 2.58e-01  
28-Aug-2018 21:00:00, 2.58e-01  
28-Aug-2018 22:00:00, 2.58e-01  
28-Aug-2018 23:00:00, 2.58e-01  
29-Aug-2018, 2.58e-01  
29-Aug-2018 01:00:00, 2.58e-01  
29-Aug-2018 02:00:00, 2.58e-01  
29-Aug-2018 03:00:00, 2.58e-01  
29-Aug-2018 04:00:00, 2.58e-01  
29-Aug-2018 05:00:00, 2.58e-01  
29-Aug-2018 06:00:00, 2.58e-01  
29-Aug-2018 07:00:00, 2.58e-01  
29-Aug-2018 08:00:00, 2.58e-01  
29-Aug-2018 09:00:00, 2.59e-01  
29-Aug-2018 10:00:00, 2.59e-01  
29-Aug-2018 11:00:00, 2.59e-01  
29-Aug-2018 12:00:00, 2.59e-01  
29-Aug-2018 13:00:00, 2.58e-01  
29-Aug-2018 14:00:00, 2.58e-01  
29-Aug-2018 15:00:00, 2.58e-01  
29-Aug-2018 16:00:00, 2.58e-01  
29-Aug-2018 17:00:00, 2.58e-01  
29-Aug-2018 18:00:00, 2.58e-01  
29-Aug-2018 19:00:00, 2.58e-01  
29-Aug-2018 20:00:00, 2.59e-01  
29-Aug-2018 21:00:00, 2.60e-01  
29-Aug-2018 22:00:00, 2.60e-01  
29-Aug-2018 23:00:00, 2.60e-01  
30-Aug-2018, 2.60e-01  
30-Aug-2018 01:00:00, 2.60e-01  
30-Aug-2018 02:00:00, 2.60e-01  
30-Aug-2018 03:00:00, 2.60e-01  
30-Aug-2018 04:00:00, 2.60e-01

30-Aug-2018 05:00:00, 2.61e-01  
30-Aug-2018 06:00:00, 2.61e-01  
30-Aug-2018 07:00:00, 2.61e-01  
30-Aug-2018 08:00:00, 2.61e-01  
30-Aug-2018 09:00:00, 2.61e-01  
30-Aug-2018 10:00:00, 2.60e-01  
30-Aug-2018 11:00:00, 2.60e-01  
30-Aug-2018 12:00:00, 2.60e-01  
30-Aug-2018 13:00:00, 2.60e-01  
30-Aug-2018 14:00:00, 2.59e-01  
30-Aug-2018 15:00:00, 2.59e-01  
30-Aug-2018 16:00:00, 2.59e-01  
30-Aug-2018 17:00:00, 2.59e-01  
30-Aug-2018 18:00:00, 2.59e-01  
30-Aug-2018 19:00:00, 2.59e-01  
30-Aug-2018 20:00:00, 2.59e-01  
30-Aug-2018 21:00:00, 2.60e-01  
30-Aug-2018 22:00:00, 2.60e-01  
30-Aug-2018 23:00:00, 2.60e-01  
31-Aug-2018, 2.60e-01  
31-Aug-2018 01:00:00, 2.60e-01  
31-Aug-2018 02:00:00, 2.60e-01  
31-Aug-2018 03:00:00, 2.60e-01  
31-Aug-2018 04:00:00, 2.61e-01  
31-Aug-2018 05:00:00, 2.61e-01  
31-Aug-2018 06:00:00, 2.61e-01  
31-Aug-2018 07:00:00, 2.61e-01  
31-Aug-2018 08:00:00, 2.60e-01  
31-Aug-2018 09:00:00, 2.61e-01  
31-Aug-2018 10:00:00, 2.61e-01  
31-Aug-2018 11:00:00, 2.61e-01  
31-Aug-2018 12:00:00, 2.60e-01  
31-Aug-2018 13:00:00, 2.60e-01  
31-Aug-2018 14:00:00, 2.60e-01  
31-Aug-2018 15:00:00, 2.60e-01  
31-Aug-2018 16:00:00, 2.60e-01  
31-Aug-2018 17:00:00, 2.60e-01  
31-Aug-2018 18:00:00, 2.60e-01  
31-Aug-2018 19:00:00, 2.60e-01  
31-Aug-2018 20:00:00, 2.60e-01  
31-Aug-2018 21:00:00, 2.61e-01  
31-Aug-2018 22:00:00, 2.61e-01  
31-Aug-2018 23:00:00, 2.61e-01  
01-Sep-2018, 2.61e-01  
01-Sep-2018 01:00:00, 2.61e-01  
01-Sep-2018 02:00:00, 2.61e-01  
01-Sep-2018 03:00:00, 2.61e-01  
01-Sep-2018 04:00:00, 2.61e-01  
01-Sep-2018 05:00:00, 2.61e-01  
01-Sep-2018 06:00:00, 2.61e-01  
01-Sep-2018 07:00:00, 2.61e-01  
01-Sep-2018 08:00:00, 2.61e-01  
01-Sep-2018 09:00:00, 2.61e-01  
01-Sep-2018 10:00:00, 2.61e-01  
01-Sep-2018 11:00:00, 2.61e-01  
01-Sep-2018 12:00:00, 2.61e-01  
01-Sep-2018 13:00:00, 2.61e-01  
01-Sep-2018 14:00:00, 2.60e-01  
01-Sep-2018 15:00:00, 2.60e-01  
01-Sep-2018 16:00:00, 2.60e-01  
01-Sep-2018 17:00:00, 2.60e-01  
01-Sep-2018 18:00:00, 2.60e-01  
01-Sep-2018 19:00:00, 2.60e-01  
01-Sep-2018 20:00:00, 2.60e-01

01-Sep-2018 21:00:00, 2.60e-01  
01-Sep-2018 22:00:00, 2.61e-01  
01-Sep-2018 23:00:00, 2.61e-01  
02-Sep-2018, 2.61e-01  
02-Sep-2018 01:00:00, 2.61e-01  
02-Sep-2018 02:00:00, 2.61e-01  
02-Sep-2018 03:00:00, 2.61e-01  
02-Sep-2018 04:00:00, 2.61e-01  
02-Sep-2018 05:00:00, 2.61e-01  
02-Sep-2018 06:00:00, 2.61e-01  
02-Sep-2018 07:00:00, 2.61e-01  
02-Sep-2018 08:00:00, 2.61e-01  
02-Sep-2018 09:00:00, 2.62e-01  
02-Sep-2018 10:00:00, 2.61e-01  
02-Sep-2018 11:00:00, 2.61e-01  
02-Sep-2018 12:00:00, 2.61e-01  
02-Sep-2018 13:00:00, 2.61e-01  
02-Sep-2018 14:00:00, 2.61e-01  
02-Sep-2018 15:00:00, 2.59e-01  
02-Sep-2018 16:00:00, 2.61e-01  
02-Sep-2018 17:00:00, 2.61e-01  
02-Sep-2018 18:00:00, 2.59e-01  
02-Sep-2018 19:00:00, 2.58e-01  
02-Sep-2018 20:00:00, 2.58e-01  
02-Sep-2018 21:00:00, 2.58e-01  
02-Sep-2018 22:00:00, 2.58e-01  
02-Sep-2018 23:00:00, 2.58e-01  
03-Sep-2018, 2.58e-01  
03-Sep-2018 01:00:00, 2.58e-01  
03-Sep-2018 02:00:00, 2.58e-01  
03-Sep-2018 03:00:00, 2.59e-01  
03-Sep-2018 04:00:00, 2.59e-01  
03-Sep-2018 05:00:00, 2.59e-01  
03-Sep-2018 06:00:00, 2.59e-01  
03-Sep-2018 07:00:00, 2.59e-01  
03-Sep-2018 08:00:00, 2.59e-01  
03-Sep-2018 09:00:00, 2.60e-01  
03-Sep-2018 10:00:00, 2.59e-01  
03-Sep-2018 11:00:00, 2.60e-01  
03-Sep-2018 12:00:00, 2.62e-01  
03-Sep-2018 13:00:00, 2.62e-01  
03-Sep-2018 14:00:00, 2.62e-01  
03-Sep-2018 15:00:00, 2.62e-01  
03-Sep-2018 16:00:00, 2.61e-01  
03-Sep-2018 17:00:00, 2.59e-01  
03-Sep-2018 18:00:00, 2.61e-01  
03-Sep-2018 19:00:00, 2.62e-01  
03-Sep-2018 20:00:00, 2.62e-01  
03-Sep-2018 21:00:00, 2.62e-01  
03-Sep-2018 22:00:00, 2.62e-01  
03-Sep-2018 23:00:00, 2.62e-01  
04-Sep-2018, 2.61e-01  
04-Sep-2018 01:00:00, 2.61e-01  
04-Sep-2018 02:00:00, 2.61e-01  
04-Sep-2018 03:00:00, 2.61e-01  
04-Sep-2018 04:00:00, 2.61e-01  
04-Sep-2018 05:00:00, 2.61e-01  
04-Sep-2018 06:00:00, 2.61e-01  
04-Sep-2018 07:00:00, 2.61e-01  
04-Sep-2018 08:00:00, 2.61e-01  
04-Sep-2018 09:00:00, 2.62e-01  
04-Sep-2018 10:00:00, 2.62e-01  
04-Sep-2018 11:00:00, 2.62e-01  
04-Sep-2018 12:00:00, 2.62e-01



04-Sep-2018 13:00:00, 2.62e-01  
04-Sep-2018 14:00:00, 2.62e-01  
04-Sep-2018 15:00:00, 2.62e-01  
04-Sep-2018 16:00:00, 2.62e-01  
04-Sep-2018 17:00:00, 2.62e-01  
04-Sep-2018 18:00:00, 2.62e-01  
04-Sep-2018 19:00:00, 2.62e-01  
04-Sep-2018 20:00:00, 2.62e-01  
04-Sep-2018 21:00:00, 2.62e-01  
04-Sep-2018 22:00:00, 2.62e-01  
04-Sep-2018 23:00:00, 2.62e-01  
05-Sep-2018, 2.62e-01  
05-Sep-2018 01:00:00, 2.62e-01  
05-Sep-2018 02:00:00, 2.62e-01  
05-Sep-2018 03:00:00, 2.62e-01  
05-Sep-2018 04:00:00, 2.62e-01  
05-Sep-2018 05:00:00, 2.62e-01  
05-Sep-2018 06:00:00, 2.62e-01  
05-Sep-2018 07:00:00, 2.62e-01  
05-Sep-2018 08:00:00, 2.62e-01  
05-Sep-2018 09:00:00, 2.63e-01  
05-Sep-2018 10:00:00, 2.66e-01  
05-Sep-2018 11:00:00, 2.66e-01  
05-Sep-2018 12:00:00, 2.61e-01  
05-Sep-2018 13:00:00, 2.61e-01  
05-Sep-2018 14:00:00, 2.62e-01  
05-Sep-2018 15:00:00, 2.64e-01  
05-Sep-2018 16:00:00, 2.66e-01  
05-Sep-2018 17:00:00, 2.67e-01  
05-Sep-2018 18:00:00, 2.65e-01  
05-Sep-2018 19:00:00, 2.61e-01  
05-Sep-2018 20:00:00, 2.61e-01  
05-Sep-2018 21:00:00, 2.61e-01  
05-Sep-2018 22:00:00, 2.61e-01  
05-Sep-2018 23:00:00, 2.61e-01  
06-Sep-2018, 2.61e-01  
06-Sep-2018 01:00:00, 2.62e-01  
06-Sep-2018 02:00:00, 2.62e-01  
06-Sep-2018 03:00:00, 2.61e-01  
06-Sep-2018 04:00:00, 2.60e-01  
06-Sep-2018 05:00:00, 2.60e-01  
06-Sep-2018 06:00:00, 2.60e-01  
06-Sep-2018 07:00:00, 2.60e-01  
06-Sep-2018 08:00:00, 2.64e-01  
06-Sep-2018 09:00:00, 2.63e-01  
06-Sep-2018 10:00:00, 2.61e-01  
06-Sep-2018 11:00:00, 2.61e-01  
06-Sep-2018 12:00:00, 2.61e-01  
06-Sep-2018 13:00:00, 2.61e-01  
06-Sep-2018 14:00:00, 2.61e-01  
06-Sep-2018 15:00:00, 2.61e-01  
06-Sep-2018 16:00:00, 2.61e-01  
06-Sep-2018 17:00:00, 2.61e-01  
06-Sep-2018 18:00:00, 2.61e-01  
06-Sep-2018 19:00:00, 2.60e-01  
06-Sep-2018 20:00:00, 2.60e-01  
06-Sep-2018 21:00:00, 2.61e-01  
06-Sep-2018 22:00:00, 2.61e-01  
06-Sep-2018 23:00:00, 2.60e-01  
07-Sep-2018, 2.60e-01  
07-Sep-2018 01:00:00, 2.60e-01  
07-Sep-2018 02:00:00, 2.60e-01  
07-Sep-2018 03:00:00, 2.60e-01  
07-Sep-2018 04:00:00, 2.60e-01

07-Sep-2018 05:00:00, 2.60e-01  
07-Sep-2018 06:00:00, 2.60e-01  
07-Sep-2018 07:00:00, 2.60e-01  
07-Sep-2018 08:00:00, 2.61e-01  
07-Sep-2018 09:00:00, 2.61e-01  
07-Sep-2018 10:00:00, 2.61e-01  
07-Sep-2018 11:00:00, 2.61e-01  
07-Sep-2018 12:00:00, 2.61e-01  
07-Sep-2018 13:00:00, 2.61e-01  
07-Sep-2018 14:00:00, 2.61e-01  
07-Sep-2018 15:00:00, 2.61e-01  
07-Sep-2018 16:00:00, 2.61e-01  
07-Sep-2018 17:00:00, 2.61e-01  
07-Sep-2018 18:00:00, 2.61e-01  
07-Sep-2018 19:00:00, 2.61e-01  
07-Sep-2018 20:00:00, 2.61e-01  
07-Sep-2018 21:00:00, 2.61e-01  
07-Sep-2018 22:00:00, 2.61e-01  
07-Sep-2018 23:00:00, 2.61e-01  
08-Sep-2018, 2.62e-01  
08-Sep-2018 01:00:00, 2.61e-01  
08-Sep-2018 02:00:00, 2.62e-01  
08-Sep-2018 03:00:00, 2.61e-01  
08-Sep-2018 04:00:00, 2.61e-01  
08-Sep-2018 05:00:00, 2.61e-01  
08-Sep-2018 06:00:00, 2.61e-01  
08-Sep-2018 07:00:00, 2.61e-01  
08-Sep-2018 08:00:00, 2.61e-01  
08-Sep-2018 09:00:00, 2.61e-01  
08-Sep-2018 10:00:00, 2.62e-01  
08-Sep-2018 11:00:00, 2.62e-01  
08-Sep-2018 12:00:00, 2.62e-01  
08-Sep-2018 13:00:00, 2.62e-01  
08-Sep-2018 14:00:00, 2.62e-01  
08-Sep-2018 15:00:00, 2.62e-01  
08-Sep-2018 16:00:00, 2.62e-01  
08-Sep-2018 17:00:00, 2.62e-01  
08-Sep-2018 18:00:00, 2.62e-01  
08-Sep-2018 19:00:00, 2.62e-01  
08-Sep-2018 20:00:00, 2.62e-01  
08-Sep-2018 21:00:00, 2.62e-01  
08-Sep-2018 22:00:00, 2.62e-01  
08-Sep-2018 23:00:00, 2.62e-01  
09-Sep-2018, 2.62e-01  
09-Sep-2018 01:00:00, 2.62e-01  
09-Sep-2018 02:00:00, 2.62e-01  
09-Sep-2018 03:00:00, 2.63e-01  
09-Sep-2018 04:00:00, 2.64e-01  
09-Sep-2018 05:00:00, 2.64e-01  
09-Sep-2018 06:00:00, 2.64e-01  
09-Sep-2018 07:00:00, 2.64e-01  
09-Sep-2018 08:00:00, 2.64e-01  
09-Sep-2018 09:00:00, 2.62e-01  
09-Sep-2018 10:00:00, 2.62e-01  
09-Sep-2018 11:00:00, 2.63e-01  
09-Sep-2018 12:00:00, 2.63e-01  
09-Sep-2018 13:00:00, 2.62e-01  
09-Sep-2018 14:00:00, 2.62e-01  
09-Sep-2018 15:00:00, 2.63e-01  
09-Sep-2018 16:00:00, 2.62e-01  
09-Sep-2018 17:00:00, 2.62e-01  
09-Sep-2018 18:00:00, 2.63e-01  
09-Sep-2018 19:00:00, 2.63e-01  
09-Sep-2018 20:00:00, 2.63e-01

09-Sep-2018 21:00:00, 2.63e-01  
09-Sep-2018 22:00:00, 2.63e-01  
09-Sep-2018 23:00:00, 2.63e-01  
10-Sep-2018, 2.63e-01  
10-Sep-2018 01:00:00, 2.63e-01  
10-Sep-2018 02:00:00, 2.63e-01  
10-Sep-2018 03:00:00, 2.63e-01  
10-Sep-2018 04:00:00, 2.63e-01  
10-Sep-2018 05:00:00, 2.63e-01  
10-Sep-2018 06:00:00, 2.63e-01  
10-Sep-2018 07:00:00, 2.63e-01  
10-Sep-2018 08:00:00, 2.63e-01  
10-Sep-2018 09:00:00, 2.63e-01  
10-Sep-2018 10:00:00, 2.63e-01  
10-Sep-2018 11:00:00, 2.63e-01  
10-Sep-2018 12:00:00, 2.63e-01  
10-Sep-2018 13:00:00, 2.63e-01  
10-Sep-2018 14:00:00, 2.63e-01  
10-Sep-2018 15:00:00, 2.63e-01  
10-Sep-2018 16:00:00, 2.63e-01  
10-Sep-2018 17:00:00, 2.63e-01  
10-Sep-2018 18:00:00, 2.63e-01  
10-Sep-2018 19:00:00, 2.63e-01  
10-Sep-2018 20:00:00, 2.64e-01  
10-Sep-2018 21:00:00, 2.64e-01  
10-Sep-2018 22:00:00, 2.64e-01  
10-Sep-2018 23:00:00, 2.64e-01  
11-Sep-2018, 2.64e-01  
11-Sep-2018 01:00:00, 2.64e-01  
11-Sep-2018 02:00:00, 2.64e-01  
11-Sep-2018 03:00:00, 2.64e-01  
11-Sep-2018 04:00:00, 2.64e-01  
11-Sep-2018 05:00:00, 2.64e-01  
11-Sep-2018 06:00:00, 2.64e-01  
11-Sep-2018 07:00:00, 2.64e-01  
11-Sep-2018 08:00:00, 2.64e-01  
11-Sep-2018 09:00:00, 2.64e-01  
11-Sep-2018 10:00:00, 2.64e-01  
11-Sep-2018 11:00:00, 2.64e-01  
11-Sep-2018 12:00:00, 2.64e-01  
11-Sep-2018 13:00:00, 2.64e-01  
11-Sep-2018 14:00:00, 2.64e-01  
11-Sep-2018 15:00:00, 2.64e-01  
11-Sep-2018 16:00:00, 2.64e-01  
11-Sep-2018 17:00:00, 2.64e-01  
11-Sep-2018 18:00:00, 2.64e-01  
11-Sep-2018 19:00:00, 2.64e-01  
11-Sep-2018 20:00:00, 2.64e-01  
11-Sep-2018 21:00:00, 2.64e-01  
11-Sep-2018 22:00:00, 2.64e-01  
11-Sep-2018 23:00:00, 2.64e-01  
12-Sep-2018, 2.64e-01  
12-Sep-2018 01:00:00, 2.64e-01  
12-Sep-2018 02:00:00, 2.64e-01  
12-Sep-2018 03:00:00, 2.64e-01  
12-Sep-2018 04:00:00, 2.64e-01  
12-Sep-2018 05:00:00, 2.64e-01  
12-Sep-2018 06:00:00, 2.65e-01  
12-Sep-2018 07:00:00, 2.65e-01  
12-Sep-2018 08:00:00, 2.64e-01  
12-Sep-2018 09:00:00, 2.64e-01  
12-Sep-2018 10:00:00, 2.64e-01  
12-Sep-2018 11:00:00, 2.64e-01  
12-Sep-2018 12:00:00, 2.64e-01

12-Sep-2018 13:00:00, 2.64e-01  
12-Sep-2018 14:00:00, 2.64e-01  
12-Sep-2018 15:00:00, 2.64e-01  
12-Sep-2018 16:00:00, 2.64e-01  
12-Sep-2018 17:00:00, 2.64e-01  
12-Sep-2018 18:00:00, 2.64e-01  
12-Sep-2018 19:00:00, 2.64e-01  
12-Sep-2018 20:00:00, 2.65e-01  
12-Sep-2018 21:00:00, 2.65e-01  
12-Sep-2018 22:00:00, 2.65e-01  
12-Sep-2018 23:00:00, 2.65e-01  
13-Sep-2018, 2.65e-01  
13-Sep-2018 01:00:00, 2.65e-01  
13-Sep-2018 02:00:00, 2.65e-01  
13-Sep-2018 03:00:00, 2.65e-01  
13-Sep-2018 04:00:00, 2.65e-01  
13-Sep-2018 05:00:00, 2.65e-01  
13-Sep-2018 06:00:00, 2.65e-01  
13-Sep-2018 07:00:00, 2.65e-01  
13-Sep-2018 08:00:00, 2.65e-01  
13-Sep-2018 09:00:00, 2.65e-01  
13-Sep-2018 10:00:00, 2.65e-01  
13-Sep-2018 11:00:00, 2.64e-01  
13-Sep-2018 12:00:00, 2.64e-01  
13-Sep-2018 13:00:00, 2.65e-01  
13-Sep-2018 14:00:00, 2.65e-01  
13-Sep-2018 15:00:00, 2.65e-01  
13-Sep-2018 16:00:00, 2.65e-01  
13-Sep-2018 17:00:00, 2.65e-01  
13-Sep-2018 18:00:00, 2.65e-01  
13-Sep-2018 19:00:00, 2.65e-01  
13-Sep-2018 20:00:00, 2.65e-01  
13-Sep-2018 21:00:00, 2.65e-01  
13-Sep-2018 22:00:00, 2.66e-01  
13-Sep-2018 23:00:00, 2.66e-01  
14-Sep-2018, 2.66e-01  
14-Sep-2018 01:00:00, 2.66e-01  
14-Sep-2018 02:00:00, 2.66e-01  
14-Sep-2018 03:00:00, 2.66e-01  
14-Sep-2018 04:00:00, 2.66e-01  
14-Sep-2018 05:00:00, 2.66e-01  
14-Sep-2018 06:00:00, 2.66e-01  
14-Sep-2018 07:00:00, 2.66e-01  
14-Sep-2018 08:00:00, 2.66e-01  
14-Sep-2018 09:00:00, 2.66e-01  
14-Sep-2018 10:00:00, 2.65e-01  
14-Sep-2018 11:00:00, 2.65e-01  
14-Sep-2018 12:00:00, 2.65e-01  
14-Sep-2018 13:00:00, 2.65e-01  
14-Sep-2018 14:00:00, 2.65e-01  
14-Sep-2018 15:00:00, 2.65e-01  
14-Sep-2018 16:00:00, 2.65e-01  
14-Sep-2018 17:00:00, 2.65e-01  
14-Sep-2018 18:00:00, 2.65e-01  
14-Sep-2018 19:00:00, 2.66e-01  
14-Sep-2018 20:00:00, 2.66e-01  
14-Sep-2018 21:00:00, 2.66e-01  
14-Sep-2018 22:00:00, 2.66e-01  
14-Sep-2018 23:00:00, 2.66e-01  
15-Sep-2018, 2.66e-01  
15-Sep-2018 01:00:00, 2.66e-01  
15-Sep-2018 02:00:00, 2.67e-01  
15-Sep-2018 03:00:00, 2.67e-01  
15-Sep-2018 04:00:00, 2.67e-01

15-Sep-2018 05:00:00, 2.67e-01  
15-Sep-2018 06:00:00, 2.67e-01  
15-Sep-2018 07:00:00, 2.67e-01  
15-Sep-2018 08:00:00, 2.67e-01  
15-Sep-2018 09:00:00, 2.66e-01  
15-Sep-2018 10:00:00, 2.66e-01  
15-Sep-2018 11:00:00, 2.65e-01  
15-Sep-2018 12:00:00, 2.65e-01  
15-Sep-2018 13:00:00, 2.65e-01  
15-Sep-2018 14:00:00, 2.65e-01  
15-Sep-2018 15:00:00, 2.65e-01  
15-Sep-2018 16:00:00, 2.65e-01  
15-Sep-2018 17:00:00, 2.65e-01  
15-Sep-2018 18:00:00, 2.66e-01  
15-Sep-2018 19:00:00, 2.66e-01  
15-Sep-2018 20:00:00, 2.66e-01  
15-Sep-2018 21:00:00, 2.66e-01  
15-Sep-2018 22:00:00, 2.66e-01  
15-Sep-2018 23:00:00, 2.67e-01  
16-Sep-2018, 2.67e-01  
16-Sep-2018 01:00:00, 2.67e-01  
16-Sep-2018 02:00:00, 2.67e-01  
16-Sep-2018 03:00:00, 2.67e-01  
16-Sep-2018 04:00:00, 2.67e-01  
16-Sep-2018 05:00:00, 2.67e-01  
16-Sep-2018 06:00:00, 2.67e-01  
16-Sep-2018 07:00:00, 2.67e-01  
16-Sep-2018 08:00:00, 2.66e-01  
16-Sep-2018 09:00:00, 2.66e-01  
16-Sep-2018 10:00:00, 2.66e-01  
16-Sep-2018 11:00:00, 2.66e-01  
16-Sep-2018 12:00:00, 2.66e-01  
16-Sep-2018 13:00:00, 2.66e-01  
16-Sep-2018 14:00:00, 2.66e-01  
16-Sep-2018 15:00:00, 2.66e-01  
16-Sep-2018 16:00:00, 2.66e-01  
16-Sep-2018 17:00:00, 2.66e-01  
16-Sep-2018 18:00:00, 2.66e-01  
16-Sep-2018 19:00:00, 2.66e-01  
16-Sep-2018 20:00:00, 2.67e-01  
16-Sep-2018 21:00:00, 2.67e-01  
16-Sep-2018 22:00:00, 2.67e-01  
16-Sep-2018 23:00:00, 2.67e-01  
17-Sep-2018, 2.67e-01  
17-Sep-2018 01:00:00, 2.67e-01  
17-Sep-2018 02:00:00, 2.67e-01  
17-Sep-2018 03:00:00, 2.67e-01  
17-Sep-2018 04:00:00, 2.67e-01  
17-Sep-2018 05:00:00, 2.67e-01  
17-Sep-2018 06:00:00, 2.67e-01  
17-Sep-2018 07:00:00, 2.67e-01  
17-Sep-2018 08:00:00, 2.66e-01  
17-Sep-2018 09:00:00, 2.66e-01  
17-Sep-2018 10:00:00, 2.66e-01  
17-Sep-2018 11:00:00, 2.66e-01  
17-Sep-2018 12:00:00, 2.66e-01  
17-Sep-2018 13:00:00, 2.66e-01  
17-Sep-2018 14:00:00, 2.66e-01  
17-Sep-2018 15:00:00, 2.66e-01  
17-Sep-2018 16:00:00, 2.66e-01  
17-Sep-2018 17:00:00, 2.66e-01  
17-Sep-2018 18:00:00, 2.66e-01  
17-Sep-2018 19:00:00, 2.67e-01  
17-Sep-2018 20:00:00, 2.67e-01

17-Sep-2018 21:00:00, 2.67e-01  
17-Sep-2018 22:00:00, 2.67e-01  
17-Sep-2018 23:00:00, 2.67e-01  
18-Sep-2018, 2.67e-01  
18-Sep-2018 01:00:00, 2.67e-01  
18-Sep-2018 02:00:00, 2.67e-01  
18-Sep-2018 03:00:00, 2.67e-01  
18-Sep-2018 04:00:00, 2.67e-01  
18-Sep-2018 05:00:00, 2.67e-01  
18-Sep-2018 06:00:00, 2.67e-01  
18-Sep-2018 07:00:00, 2.67e-01  
18-Sep-2018 08:00:00, 2.67e-01  
18-Sep-2018 09:00:00, 2.67e-01  
18-Sep-2018 10:00:00, 2.66e-01  
18-Sep-2018 11:00:00, 2.66e-01  
18-Sep-2018 12:00:00, 2.66e-01  
18-Sep-2018 13:00:00, 2.67e-01  
18-Sep-2018 14:00:00, 2.66e-01  
18-Sep-2018 15:00:00, 2.66e-01  
18-Sep-2018 16:00:00, 2.66e-01  
18-Sep-2018 17:00:00, 2.67e-01  
18-Sep-2018 18:00:00, 2.67e-01  
18-Sep-2018 19:00:00, 2.67e-01  
18-Sep-2018 20:00:00, 2.67e-01  
18-Sep-2018 21:00:00, 2.67e-01  
18-Sep-2018 22:00:00, 2.67e-01  
18-Sep-2018 23:00:00, 2.67e-01  
19-Sep-2018, 2.67e-01  
19-Sep-2018 01:00:00, 2.67e-01  
19-Sep-2018 02:00:00, 2.67e-01  
19-Sep-2018 03:00:00, 2.67e-01  
19-Sep-2018 04:00:00, 2.67e-01  
19-Sep-2018 05:00:00, 2.67e-01  
19-Sep-2018 06:00:00, 2.67e-01  
19-Sep-2018 07:00:00, 2.67e-01  
19-Sep-2018 08:00:00, 2.67e-01  
19-Sep-2018 09:00:00, 2.67e-01  
19-Sep-2018 10:00:00, 2.67e-01  
19-Sep-2018 11:00:00, 2.67e-01  
19-Sep-2018 12:00:00, 2.67e-01  
19-Sep-2018 13:00:00, 2.67e-01  
19-Sep-2018 14:00:00, 2.64e-01  
19-Sep-2018 15:00:00, 2.65e-01  
19-Sep-2018 16:00:00, 2.69e-01  
19-Sep-2018 17:00:00, 2.70e-01  
19-Sep-2018 18:00:00, 2.69e-01  
19-Sep-2018 19:00:00, 2.70e-01  
19-Sep-2018 20:00:00, 2.70e-01  
19-Sep-2018 21:00:00, 2.70e-01  
19-Sep-2018 22:00:00, 2.70e-01  
19-Sep-2018 23:00:00, 2.70e-01  
20-Sep-2018, 2.69e-01  
20-Sep-2018 01:00:00, 2.69e-01  
20-Sep-2018 02:00:00, 2.69e-01  
20-Sep-2018 03:00:00, 2.69e-01  
20-Sep-2018 04:00:00, 2.69e-01  
20-Sep-2018 05:00:00, 2.69e-01  
20-Sep-2018 06:00:00, 2.69e-01  
20-Sep-2018 07:00:00, 2.69e-01  
20-Sep-2018 08:00:00, 2.69e-01  
20-Sep-2018 09:00:00, 2.67e-01  
20-Sep-2018 10:00:00, 2.64e-01  
20-Sep-2018 11:00:00, 2.64e-01  
20-Sep-2018 12:00:00, 2.64e-01

20-Sep-2018 13:00:00, 2.64e-01  
20-Sep-2018 14:00:00, 2.64e-01  
20-Sep-2018 15:00:00, 2.64e-01  
20-Sep-2018 16:00:00, 2.64e-01  
20-Sep-2018 17:00:00, 2.64e-01  
20-Sep-2018 18:00:00, 2.64e-01  
20-Sep-2018 19:00:00, 2.64e-01  
20-Sep-2018 20:00:00, 2.64e-01  
20-Sep-2018 21:00:00, 2.64e-01  
20-Sep-2018 22:00:00, 2.64e-01  
20-Sep-2018 23:00:00, 2.64e-01  
21-Sep-2018, 2.64e-01  
21-Sep-2018 01:00:00, 2.64e-01  
21-Sep-2018 02:00:00, 2.64e-01  
21-Sep-2018 03:00:00, 2.64e-01  
21-Sep-2018 04:00:00, 2.64e-01  
21-Sep-2018 05:00:00, 2.64e-01  
21-Sep-2018 06:00:00, 2.64e-01  
21-Sep-2018 07:00:00, 2.64e-01  
21-Sep-2018 08:00:00, 2.64e-01  
21-Sep-2018 09:00:00, 2.64e-01  
21-Sep-2018 10:00:00, 2.64e-01  
21-Sep-2018 11:00:00, 2.64e-01  
21-Sep-2018 12:00:00, 2.64e-01  
21-Sep-2018 13:00:00, 2.64e-01  
21-Sep-2018 14:00:00, 2.64e-01  
21-Sep-2018 15:00:00, 2.64e-01  
21-Sep-2018 16:00:00, 2.64e-01  
21-Sep-2018 17:00:00, 2.64e-01  
21-Sep-2018 18:00:00, 2.64e-01  
21-Sep-2018 19:00:00, 2.65e-01  
21-Sep-2018 20:00:00, 2.65e-01  
21-Sep-2018 21:00:00, 2.65e-01  
21-Sep-2018 22:00:00, 2.65e-01  
21-Sep-2018 23:00:00, 2.65e-01  
22-Sep-2018, 2.65e-01  
22-Sep-2018 01:00:00, 2.65e-01  
22-Sep-2018 02:00:00, 2.65e-01  
22-Sep-2018 03:00:00, 2.65e-01  
22-Sep-2018 04:00:00, 2.65e-01  
22-Sep-2018 05:00:00, 2.65e-01  
22-Sep-2018 06:00:00, 2.65e-01  
22-Sep-2018 07:00:00, 2.65e-01  
22-Sep-2018 08:00:00, 2.65e-01  
22-Sep-2018 09:00:00, 2.65e-01  
22-Sep-2018 10:00:00, 2.65e-01  
22-Sep-2018 11:00:00, 2.65e-01  
22-Sep-2018 12:00:00, 2.65e-01  
22-Sep-2018 13:00:00, 2.65e-01  
22-Sep-2018 14:00:00, 2.65e-01  
22-Sep-2018 15:00:00, 2.65e-01  
22-Sep-2018 16:00:00, 2.65e-01  
22-Sep-2018 17:00:00, 2.65e-01  
22-Sep-2018 18:00:00, 2.65e-01  
22-Sep-2018 19:00:00, 2.65e-01  
22-Sep-2018 20:00:00, 2.65e-01  
22-Sep-2018 21:00:00, 2.65e-01  
22-Sep-2018 22:00:00, 2.65e-01  
22-Sep-2018 23:00:00, 2.65e-01  
23-Sep-2018, 2.65e-01  
23-Sep-2018 01:00:00, 2.65e-01  
23-Sep-2018 02:00:00, 2.65e-01  
23-Sep-2018 03:00:00, 2.65e-01  
23-Sep-2018 04:00:00, 2.65e-01

23-Sep-2018 05:00:00, 2.65e-01  
23-Sep-2018 06:00:00, 2.65e-01  
23-Sep-2018 07:00:00, 2.65e-01  
23-Sep-2018 08:00:00, 2.65e-01  
23-Sep-2018 09:00:00, 2.65e-01  
23-Sep-2018 10:00:00, 2.65e-01  
23-Sep-2018 11:00:00, 2.65e-01  
23-Sep-2018 12:00:00, 2.65e-01  
23-Sep-2018 13:00:00, 2.65e-01  
23-Sep-2018 14:00:00, 2.66e-01  
23-Sep-2018 15:00:00, 2.66e-01  
23-Sep-2018 16:00:00, 2.65e-01  
23-Sep-2018 17:00:00, 2.66e-01  
23-Sep-2018 18:00:00, 2.66e-01  
23-Sep-2018 19:00:00, 2.66e-01  
23-Sep-2018 20:00:00, 2.66e-01  
23-Sep-2018 21:00:00, 2.66e-01  
23-Sep-2018 22:00:00, 2.66e-01  
23-Sep-2018 23:00:00, 2.66e-01  
24-Sep-2018, 2.66e-01  
24-Sep-2018 01:00:00, 2.66e-01  
24-Sep-2018 02:00:00, 2.66e-01  
24-Sep-2018 03:00:00, 2.66e-01  
24-Sep-2018 04:00:00, 2.66e-01  
24-Sep-2018 05:00:00, 2.66e-01  
24-Sep-2018 06:00:00, 2.66e-01  
24-Sep-2018 07:00:00, 2.66e-01  
24-Sep-2018 08:00:00, 2.66e-01  
24-Sep-2018 09:00:00, 2.66e-01  
24-Sep-2018 10:00:00, 2.66e-01  
24-Sep-2018 11:00:00, 2.67e-01  
24-Sep-2018 12:00:00, 2.65e-01  
24-Sep-2018 13:00:00, 2.69e-01  
24-Sep-2018 14:00:00, 2.71e-01  
24-Sep-2018 15:00:00, 2.65e-01  
24-Sep-2018 16:00:00, 2.65e-01  
24-Sep-2018 17:00:00, 2.65e-01  
24-Sep-2018 18:00:00, 2.65e-01  
24-Sep-2018 19:00:00, 2.65e-01  
24-Sep-2018 20:00:00, 2.65e-01  
24-Sep-2018 21:00:00, 2.65e-01  
24-Sep-2018 22:00:00, 2.65e-01  
24-Sep-2018 23:00:00, 2.65e-01  
25-Sep-2018, 2.65e-01  
25-Sep-2018 01:00:00, 2.65e-01  
25-Sep-2018 02:00:00, 2.65e-01  
25-Sep-2018 03:00:00, 2.65e-01  
25-Sep-2018 04:00:00, 2.65e-01  
25-Sep-2018 05:00:00, 2.65e-01  
25-Sep-2018 06:00:00, 2.65e-01  
25-Sep-2018 07:00:00, 2.65e-01  
25-Sep-2018 08:00:00, 2.65e-01  
25-Sep-2018 09:00:00, 2.65e-01  
25-Sep-2018 10:00:00, 2.65e-01  
25-Sep-2018 11:00:00, 2.65e-01  
25-Sep-2018 12:00:00, 2.65e-01  
25-Sep-2018 13:00:00, 2.65e-01  
25-Sep-2018 14:00:00, 2.65e-01  
25-Sep-2018 15:00:00, 2.65e-01  
25-Sep-2018 16:00:00, 2.66e-01  
25-Sep-2018 17:00:00, 2.66e-01  
25-Sep-2018 18:00:00, 2.66e-01  
25-Sep-2018 19:00:00, 2.66e-01  
25-Sep-2018 20:00:00, 2.66e-01



25-Sep-2018 21:00:00, 2.66e-01  
25-Sep-2018 22:00:00, 2.66e-01  
25-Sep-2018 23:00:00, 2.66e-01  
26-Sep-2018, 2.66e-01  
26-Sep-2018 01:00:00, 2.66e-01  
26-Sep-2018 02:00:00, 2.66e-01  
26-Sep-2018 03:00:00, 2.66e-01  
26-Sep-2018 04:00:00, 2.66e-01  
26-Sep-2018 05:00:00, 2.66e-01  
26-Sep-2018 06:00:00, 2.66e-01  
26-Sep-2018 07:00:00, 2.66e-01  
26-Sep-2018 08:00:00, 2.66e-01  
26-Sep-2018 09:00:00, 2.66e-01  
26-Sep-2018 10:00:00, 2.66e-01  
26-Sep-2018 11:00:00, 2.66e-01  
26-Sep-2018 12:00:00, 2.66e-01  
26-Sep-2018 13:00:00, 2.66e-01  
26-Sep-2018 14:00:00, 2.66e-01  
26-Sep-2018 15:00:00, 2.66e-01  
26-Sep-2018 16:00:00, 2.66e-01  
27-Sep-2018 18:00:00, 2.67e-01  
27-Sep-2018 19:00:00, 2.67e-01  
27-Sep-2018 20:00:00, 2.67e-01  
27-Sep-2018 21:00:00, 2.68e-01  
27-Sep-2018 22:00:00, 2.68e-01  
27-Sep-2018 23:00:00, 2.68e-01  
28-Sep-2018, 2.68e-01  
28-Sep-2018 01:00:00, 2.68e-01  
28-Sep-2018 02:00:00, 2.68e-01  
28-Sep-2018 03:00:00, 2.68e-01  
28-Sep-2018 04:00:00, 2.68e-01  
28-Sep-2018 05:00:00, 2.68e-01  
28-Sep-2018 06:00:00, 2.68e-01  
28-Sep-2018 08:00:00, 2.68e-01  
28-Sep-2018 09:00:00, 2.67e-01  
28-Sep-2018 10:00:00, 2.67e-01  
28-Sep-2018 11:00:00, 2.67e-01  
28-Sep-2018 12:00:00, 2.67e-01  
28-Sep-2018 13:00:00, 2.67e-01  
28-Sep-2018 14:00:00, 2.67e-01  
28-Sep-2018 15:00:00, 2.67e-01  
28-Sep-2018 16:00:00, 2.67e-01  
28-Sep-2018 17:00:00, 2.67e-01  
28-Sep-2018 18:00:00, 2.67e-01  
28-Sep-2018 19:00:00, 2.68e-01  
28-Sep-2018 20:00:00, 2.68e-01  
28-Sep-2018 21:00:00, 2.68e-01  
28-Sep-2018 22:00:00, 2.68e-01  
28-Sep-2018 23:00:00, 2.68e-01  
29-Sep-2018, 2.68e-01  
29-Sep-2018 01:00:00, 2.68e-01  
29-Sep-2018 02:00:00, 2.68e-01  
29-Sep-2018 03:00:00, 2.68e-01  
29-Sep-2018 04:00:00, 2.68e-01  
29-Sep-2018 05:00:00, 2.68e-01  
29-Sep-2018 06:00:00, 2.68e-01  
29-Sep-2018 07:00:00, 2.68e-01  
29-Sep-2018 08:00:00, 2.68e-01  
29-Sep-2018 09:00:00, 2.68e-01  
29-Sep-2018 10:00:00, 2.68e-01  
29-Sep-2018 11:00:00, 2.67e-01  
29-Sep-2018 12:00:00, 2.67e-01  
29-Sep-2018 13:00:00, 2.67e-01  
29-Sep-2018 14:00:00, 2.67e-01

29-Sep-2018 15:00:00, 2.67e-01  
29-Sep-2018 16:00:00, 2.67e-01  
29-Sep-2018 17:00:00, 2.68e-01  
29-Sep-2018 18:00:00, 2.68e-01  
29-Sep-2018 19:00:00, 2.68e-01  
29-Sep-2018 20:00:00, 2.68e-01  
29-Sep-2018 21:00:00, 2.68e-01  
29-Sep-2018 22:00:00, 2.68e-01  
29-Sep-2018 23:00:00, 2.69e-01  
30-Sep-2018, 2.69e-01  
30-Sep-2018 01:00:00, 2.69e-01  
30-Sep-2018 02:00:00, 2.69e-01  
30-Sep-2018 03:00:00, 2.69e-01  
30-Sep-2018 04:00:00, 2.69e-01  
30-Sep-2018 05:00:00, 2.69e-01  
30-Sep-2018 06:00:00, 2.69e-01  
30-Sep-2018 07:00:00, 2.69e-01  
30-Sep-2018 08:00:00, 2.69e-01  
30-Sep-2018 09:00:00, 2.68e-01  
30-Sep-2018 10:00:00, 2.68e-01  
30-Sep-2018 11:00:00, 2.68e-01  
30-Sep-2018 12:00:00, 2.68e-01  
30-Sep-2018 13:00:00, 2.68e-01  
30-Sep-2018 14:00:00, 2.68e-01  
30-Sep-2018 15:00:00, 2.68e-01  
30-Sep-2018 16:00:00, 2.68e-01  
30-Sep-2018 17:00:00, 2.68e-01  
30-Sep-2018 18:00:00, 2.68e-01  
30-Sep-2018 19:00:00, 2.69e-01  
30-Sep-2018 20:00:00, 2.69e-01  
30-Sep-2018 21:00:00, 2.69e-01  
30-Sep-2018 22:00:00, 2.69e-01  
30-Sep-2018 23:00:00, 2.69e-01  
01-Oct-2018, 2.69e-01  
01-Oct-2018 01:00:00, 2.69e-01  
01-Oct-2018 02:00:00, 2.69e-01  
01-Oct-2018 03:00:00, 2.69e-01  
01-Oct-2018 04:00:00, 2.69e-01  
01-Oct-2018 05:00:00, 2.69e-01  
01-Oct-2018 06:00:00, 2.69e-01  
01-Oct-2018 07:00:00, 2.69e-01  
01-Oct-2018 08:00:00, 2.69e-01  
01-Oct-2018 09:00:00, 2.69e-01  
01-Oct-2018 10:00:00, 2.69e-01  
01-Oct-2018 11:00:00, 2.69e-01  
01-Oct-2018 12:00:00, 2.69e-01  
01-Oct-2018 13:00:00, 2.69e-01  
01-Oct-2018 14:00:00, 2.72e-01  
01-Oct-2018 15:00:00, 2.70e-01  
01-Oct-2018 16:00:00, 2.67e-01  
01-Oct-2018 17:00:00, 2.67e-01  
01-Oct-2018 18:00:00, 2.67e-01  
01-Oct-2018 19:00:00, 2.67e-01  
01-Oct-2018 20:00:00, 2.67e-01  
01-Oct-2018 21:00:00, 2.67e-01  
01-Oct-2018 22:00:00, 2.67e-01  
01-Oct-2018 23:00:00, 2.67e-01  
02-Oct-2018, 2.67e-01  
02-Oct-2018 01:00:00, 2.66e-01  
02-Oct-2018 02:00:00, 2.66e-01  
02-Oct-2018 03:00:00, 2.67e-01  
02-Oct-2018 04:00:00, 2.67e-01  
02-Oct-2018 05:00:00, 2.67e-01  
02-Oct-2018 06:00:00, 2.67e-01

02-Oct-2018 07:00:00, 2.68e-01  
02-Oct-2018 08:00:00, 2.70e-01  
02-Oct-2018 09:00:00, 2.72e-01  
02-Oct-2018 10:00:00, 2.72e-01  
02-Oct-2018 11:00:00, 2.72e-01  
02-Oct-2018 12:00:00, 2.72e-01  
02-Oct-2018 13:00:00, 2.71e-01  
02-Oct-2018 14:00:00, 2.71e-01  
02-Oct-2018 15:00:00, 2.71e-01  
02-Oct-2018 16:00:00, 2.71e-01  
02-Oct-2018 17:00:00, 2.71e-01  
02-Oct-2018 18:00:00, 2.71e-01  
02-Oct-2018 19:00:00, 2.70e-01  
02-Oct-2018 20:00:00, 2.70e-01  
02-Oct-2018 21:00:00, 2.70e-01  
02-Oct-2018 22:00:00, 2.70e-01  
02-Oct-2018 23:00:00, 2.71e-01  
03-Oct-2018, 2.71e-01  
03-Oct-2018 01:00:00, 2.72e-01  
03-Oct-2018 02:00:00, 2.72e-01  
03-Oct-2018 03:00:00, 2.72e-01  
03-Oct-2018 04:00:00, 2.73e-01  
03-Oct-2018 05:00:00, 2.73e-01  
03-Oct-2018 06:00:00, 2.73e-01  
03-Oct-2018 07:00:00, 2.73e-01  
03-Oct-2018 08:00:00, 2.72e-01  
03-Oct-2018 09:00:00, 2.72e-01  
03-Oct-2018 10:00:00, 2.72e-01  
03-Oct-2018 11:00:00, 2.69e-01  
03-Oct-2018 12:00:00, 2.68e-01  
03-Oct-2018 13:00:00, 2.68e-01  
03-Oct-2018 14:00:00, 2.68e-01  
03-Oct-2018 15:00:00, 2.68e-01  
03-Oct-2018 16:00:00, 2.68e-01  
03-Oct-2018 17:00:00, 2.68e-01  
03-Oct-2018 18:00:00, 2.68e-01  
03-Oct-2018 19:00:00, 2.67e-01  
03-Oct-2018 20:00:00, 2.67e-01  
03-Oct-2018 21:00:00, 2.67e-01  
03-Oct-2018 22:00:00, 2.67e-01  
03-Oct-2018 23:00:00, 2.67e-01  
04-Oct-2018, 2.68e-01  
04-Oct-2018 01:00:00, 2.68e-01  
04-Oct-2018 02:00:00, 2.68e-01  
04-Oct-2018 03:00:00, 2.68e-01  
04-Oct-2018 04:00:00, 2.68e-01  
04-Oct-2018 05:00:00, 2.68e-01  
04-Oct-2018 06:00:00, 2.68e-01  
04-Oct-2018 07:00:00, 2.69e-01  
04-Oct-2018 08:00:00, 2.69e-01  
04-Oct-2018 09:00:00, 2.69e-01  
04-Oct-2018 10:00:00, 2.68e-01  
04-Oct-2018 11:00:00, 2.68e-01  
04-Oct-2018 12:00:00, 2.71e-01  
04-Oct-2018 13:00:00, 2.70e-01  
04-Oct-2018 14:00:00, 2.71e-01  
04-Oct-2018 15:00:00, 2.68e-01  
04-Oct-2018 16:00:00, 2.68e-01  
04-Oct-2018 17:00:00, 2.68e-01  
04-Oct-2018 18:00:00, 2.68e-01  
04-Oct-2018 19:00:00, 2.68e-01  
04-Oct-2018 20:00:00, 2.68e-01  
04-Oct-2018 21:00:00, 2.68e-01  
04-Oct-2018 22:00:00, 2.68e-01

04-Oct-2018 23:00:00, 2.68e-01  
05-Oct-2018, 2.68e-01  
05-Oct-2018 01:00:00, 2.68e-01  
05-Oct-2018 02:00:00, 2.68e-01  
05-Oct-2018 03:00:00, 2.68e-01  
05-Oct-2018 04:00:00, 2.68e-01  
05-Oct-2018 05:00:00, 2.68e-01  
05-Oct-2018 06:00:00, 2.68e-01  
05-Oct-2018 07:00:00, 2.68e-01  
05-Oct-2018 08:00:00, 2.68e-01  
05-Oct-2018 09:00:00, 2.68e-01  
05-Oct-2018 10:00:00, 2.68e-01  
05-Oct-2018 11:00:00, 2.68e-01  
05-Oct-2018 12:00:00, 2.68e-01  
05-Oct-2018 13:00:00, 2.70e-01  
05-Oct-2018 14:00:00, 2.69e-01  
05-Oct-2018 15:00:00, 2.68e-01  
05-Oct-2018 16:00:00, 2.68e-01  
05-Oct-2018 17:00:00, 2.68e-01  
05-Oct-2018 18:00:00, 2.69e-01  
05-Oct-2018 19:00:00, 2.68e-01  
05-Oct-2018 20:00:00, 2.68e-01  
05-Oct-2018 21:00:00, 2.71e-01  
05-Oct-2018 22:00:00, 2.71e-01  
05-Oct-2018 23:00:00, 2.71e-01  
06-Oct-2018, 2.71e-01  
06-Oct-2018 01:00:00, 2.70e-01  
06-Oct-2018 02:00:00, 2.69e-01  
06-Oct-2018 03:00:00, 2.69e-01  
06-Oct-2018 04:00:00, 2.69e-01  
06-Oct-2018 05:00:00, 2.69e-01  
06-Oct-2018 06:00:00, 2.69e-01  
06-Oct-2018 07:00:00, 2.69e-01  
06-Oct-2018 08:00:00, 2.69e-01  
06-Oct-2018 09:00:00, 2.72e-01  
06-Oct-2018 10:00:00, 2.72e-01  
06-Oct-2018 11:00:00, 2.70e-01  
06-Oct-2018 12:00:00, 2.69e-01  
06-Oct-2018 13:00:00, 2.69e-01  
06-Oct-2018 14:00:00, 2.69e-01  
06-Oct-2018 15:00:00, 2.69e-01  
06-Oct-2018 16:00:00, 2.69e-01  
06-Oct-2018 17:00:00, 2.69e-01  
06-Oct-2018 18:00:00, 2.69e-01  
06-Oct-2018 19:00:00, 2.69e-01  
06-Oct-2018 20:00:00, 2.69e-01  
06-Oct-2018 21:00:00, 2.69e-01  
06-Oct-2018 22:00:00, 2.69e-01  
06-Oct-2018 23:00:00, 2.68e-01  
07-Oct-2018, 2.68e-01  
07-Oct-2018 01:00:00, 2.68e-01  
07-Oct-2018 02:00:00, 2.68e-01  
07-Oct-2018 03:00:00, 2.68e-01  
07-Oct-2018 04:00:00, 2.68e-01  
07-Oct-2018 05:00:00, 2.68e-01  
07-Oct-2018 06:00:00, 2.68e-01  
07-Oct-2018 07:00:00, 2.68e-01  
07-Oct-2018 08:00:00, 2.68e-01  
07-Oct-2018 09:00:00, 2.69e-01  
07-Oct-2018 10:00:00, 2.69e-01  
07-Oct-2018 11:00:00, 2.69e-01  
07-Oct-2018 12:00:00, 2.69e-01  
07-Oct-2018 13:00:00, 2.69e-01  
07-Oct-2018 14:00:00, 2.69e-01

07-Oct-2018 15:00:00, 2.69e-01  
07-Oct-2018 16:00:00, 2.69e-01  
07-Oct-2018 17:00:00, 2.69e-01  
07-Oct-2018 18:00:00, 2.69e-01  
07-Oct-2018 19:00:00, 2.69e-01  
07-Oct-2018 20:00:00, 2.69e-01  
07-Oct-2018 21:00:00, 2.69e-01  
07-Oct-2018 22:00:00, 2.70e-01  
07-Oct-2018 23:00:00, 2.72e-01  
08-Oct-2018, 2.72e-01  
08-Oct-2018 01:00:00, 2.72e-01  
08-Oct-2018 02:00:00, 2.72e-01  
08-Oct-2018 03:00:00, 2.72e-01  
08-Oct-2018 04:00:00, 2.73e-01  
08-Oct-2018 05:00:00, 2.72e-01  
08-Oct-2018 06:00:00, 2.72e-01  
08-Oct-2018 07:00:00, 2.73e-01  
08-Oct-2018 08:00:00, 2.73e-01  
08-Oct-2018 09:00:00, 2.73e-01  
08-Oct-2018 10:00:00, 2.71e-01  
08-Oct-2018 11:00:00, 2.71e-01  
08-Oct-2018 12:00:00, 2.70e-01  
08-Oct-2018 13:00:00, 2.71e-01  
08-Oct-2018 14:00:00, 2.70e-01  
08-Oct-2018 15:00:00, 2.70e-01  
08-Oct-2018 16:00:00, 2.69e-01  
08-Oct-2018 17:00:00, 2.70e-01  
08-Oct-2018 18:00:00, 2.70e-01  
08-Oct-2018 19:00:00, 2.69e-01  
08-Oct-2018 20:00:00, 2.69e-01  
08-Oct-2018 21:00:00, 2.69e-01  
08-Oct-2018 22:00:00, 2.69e-01  
08-Oct-2018 23:00:00, 2.69e-01  
09-Oct-2018, 2.69e-01  
09-Oct-2018 01:00:00, 2.69e-01  
09-Oct-2018 02:00:00, 2.69e-01  
09-Oct-2018 03:00:00, 2.69e-01  
09-Oct-2018 04:00:00, 2.69e-01  
09-Oct-2018 05:00:00, 2.69e-01  
09-Oct-2018 06:00:00, 2.69e-01  
09-Oct-2018 07:00:00, 2.69e-01  
09-Oct-2018 08:00:00, 2.69e-01  
09-Oct-2018 09:00:00, 2.69e-01  
09-Oct-2018 10:00:00, 2.71e-01  
09-Oct-2018 11:00:00, 2.69e-01  
09-Oct-2018 12:00:00, 2.69e-01  
09-Oct-2018 13:00:00, 2.69e-01  
09-Oct-2018 14:00:00, 2.69e-01  
09-Oct-2018 15:00:00, 2.69e-01  
09-Oct-2018 16:00:00, 2.69e-01  
09-Oct-2018 17:00:00, 2.69e-01  
09-Oct-2018 18:00:00, 2.69e-01  
09-Oct-2018 19:00:00, 2.69e-01  
09-Oct-2018 20:00:00, 2.69e-01  
09-Oct-2018 21:00:00, 2.69e-01  
09-Oct-2018 22:00:00, 2.69e-01  
09-Oct-2018 23:00:00, 2.69e-01  
10-Oct-2018, 2.69e-01  
10-Oct-2018 01:00:00, 2.69e-01  
10-Oct-2018 02:00:00, 2.69e-01  
10-Oct-2018 03:00:00, 2.69e-01  
10-Oct-2018 04:00:00, 2.69e-01  
10-Oct-2018 05:00:00, 2.69e-01  
10-Oct-2018 06:00:00, 2.69e-01

10-Oct-2018 07:00:00, 2.69e-01  
10-Oct-2018 08:00:00, 2.69e-01  
10-Oct-2018 09:00:00, 2.70e-01  
10-Oct-2018 10:00:00, 2.71e-01  
10-Oct-2018 11:00:00, 2.72e-01  
10-Oct-2018 12:00:00, 2.72e-01  
10-Oct-2018 13:00:00, 2.71e-01  
10-Oct-2018 14:00:00, 2.70e-01  
10-Oct-2018 15:00:00, 2.70e-01  
10-Oct-2018 16:00:00, 2.70e-01  
10-Oct-2018 17:00:00, 2.69e-01  
10-Oct-2018 18:00:00, 2.69e-01  
10-Oct-2018 19:00:00, 2.70e-01  
10-Oct-2018 20:00:00, 2.70e-01  
10-Oct-2018 21:00:00, 2.70e-01  
10-Oct-2018 22:00:00, 2.70e-01  
10-Oct-2018 23:00:00, 2.70e-01  
11-Oct-2018, 2.70e-01  
11-Oct-2018 01:00:00, 2.70e-01  
11-Oct-2018 02:00:00, 2.70e-01  
11-Oct-2018 03:00:00, 2.70e-01  
11-Oct-2018 04:00:00, 2.70e-01  
11-Oct-2018 05:00:00, 2.70e-01  
11-Oct-2018 06:00:00, 2.70e-01  
11-Oct-2018 07:00:00, 2.70e-01  
11-Oct-2018 08:00:00, 2.70e-01  
11-Oct-2018 09:00:00, 2.70e-01  
11-Oct-2018 10:00:00, 2.72e-01  
11-Oct-2018 11:00:00, 2.73e-01  
11-Oct-2018 12:00:00, 2.74e-01  
11-Oct-2018 13:00:00, 2.75e-01  
11-Oct-2018 14:00:00, 2.74e-01  
11-Oct-2018 15:00:00, 2.74e-01  
11-Oct-2018 16:00:00, 2.72e-01  
11-Oct-2018 17:00:00, 2.70e-01  
11-Oct-2018 18:00:00, 2.70e-01  
11-Oct-2018 19:00:00, 2.70e-01  
11-Oct-2018 20:00:00, 2.70e-01  
11-Oct-2018 21:00:00, 2.70e-01  
11-Oct-2018 22:00:00, 2.70e-01  
11-Oct-2018 23:00:00, 2.70e-01  
12-Oct-2018, 2.70e-01  
12-Oct-2018 01:00:00, 2.70e-01  
12-Oct-2018 02:00:00, 2.70e-01  
12-Oct-2018 03:00:00, 2.71e-01  
12-Oct-2018 04:00:00, 2.71e-01  
12-Oct-2018 05:00:00, 2.71e-01  
12-Oct-2018 06:00:00, 2.71e-01  
12-Oct-2018 07:00:00, 2.71e-01  
12-Oct-2018 08:00:00, 2.71e-01  
12-Oct-2018 09:00:00, 2.71e-01  
12-Oct-2018 10:00:00, 2.72e-01  
12-Oct-2018 11:00:00, 2.71e-01  
12-Oct-2018 12:00:00, 2.71e-01  
12-Oct-2018 13:00:00, 2.71e-01  
12-Oct-2018 14:00:00, 2.71e-01  
12-Oct-2018 15:00:00, 2.71e-01  
12-Oct-2018 16:00:00, 2.71e-01  
12-Oct-2018 17:00:00, 2.71e-01  
12-Oct-2018 18:00:00, 2.71e-01  
12-Oct-2018 19:00:00, 2.71e-01  
12-Oct-2018 20:00:00, 2.71e-01  
12-Oct-2018 21:00:00, 2.71e-01  
12-Oct-2018 22:00:00, 2.71e-01

12-Oct-2018 23:00:00, 2.71e-01  
13-Oct-2018, 2.71e-01  
13-Oct-2018 01:00:00, 2.71e-01  
13-Oct-2018 02:00:00, 2.71e-01  
13-Oct-2018 03:00:00, 2.71e-01  
13-Oct-2018 04:00:00, 2.71e-01  
13-Oct-2018 05:00:00, 2.71e-01  
13-Oct-2018 06:00:00, 2.71e-01  
13-Oct-2018 07:00:00, 2.71e-01  
13-Oct-2018 08:00:00, 2.71e-01  
13-Oct-2018 09:00:00, 2.71e-01  
13-Oct-2018 10:00:00, 2.71e-01  
13-Oct-2018 11:00:00, 2.71e-01  
13-Oct-2018 12:00:00, 2.71e-01  
13-Oct-2018 13:00:00, 2.71e-01  
13-Oct-2018 14:00:00, 2.71e-01  
13-Oct-2018 15:00:00, 2.71e-01  
13-Oct-2018 16:00:00, 2.71e-01  
13-Oct-2018 17:00:00, 2.71e-01  
13-Oct-2018 18:00:00, 2.71e-01  
13-Oct-2018 19:00:00, 2.71e-01  
13-Oct-2018 20:00:00, 2.71e-01  
13-Oct-2018 21:00:00, 2.71e-01  
13-Oct-2018 22:00:00, 2.71e-01  
13-Oct-2018 23:00:00, 2.71e-01  
14-Oct-2018, 2.71e-01  
14-Oct-2018 01:00:00, 2.71e-01  
14-Oct-2018 02:00:00, 2.71e-01  
14-Oct-2018 03:00:00, 2.71e-01  
14-Oct-2018 04:00:00, 2.71e-01  
14-Oct-2018 05:00:00, 2.71e-01  
14-Oct-2018 06:00:00, 2.71e-01  
14-Oct-2018 07:00:00, 2.72e-01  
14-Oct-2018 08:00:00, 2.71e-01  
14-Oct-2018 09:00:00, 2.72e-01  
14-Oct-2018 10:00:00, 2.72e-01  
14-Oct-2018 11:00:00, 2.72e-01  
14-Oct-2018 12:00:00, 2.72e-01  
14-Oct-2018 13:00:00, 2.72e-01  
14-Oct-2018 14:00:00, 2.72e-01  
14-Oct-2018 15:00:00, 2.72e-01  
14-Oct-2018 16:00:00, 2.72e-01  
14-Oct-2018 17:00:00, 2.72e-01  
14-Oct-2018 18:00:00, 2.72e-01  
14-Oct-2018 19:00:00, 2.72e-01  
14-Oct-2018 20:00:00, 2.72e-01  
14-Oct-2018 21:00:00, 2.72e-01  
14-Oct-2018 22:00:00, 2.72e-01  
14-Oct-2018 23:00:00, 2.72e-01  
15-Oct-2018, 2.71e-01  
15-Oct-2018 01:00:00, 2.72e-01  
15-Oct-2018 02:00:00, 2.72e-01  
15-Oct-2018 03:00:00, 2.71e-01  
15-Oct-2018 04:00:00, 2.71e-01  
15-Oct-2018 05:00:00, 2.71e-01  
15-Oct-2018 06:00:00, 2.71e-01  
15-Oct-2018 07:00:00, 2.71e-01  
15-Oct-2018 08:00:00, 2.71e-01  
15-Oct-2018 09:00:00, 2.71e-01  
15-Oct-2018 10:00:00, 2.71e-01  
15-Oct-2018 11:00:00, 2.72e-01  
15-Oct-2018 12:00:00, 2.72e-01  
15-Oct-2018 13:00:00, 2.72e-01  
15-Oct-2018 14:00:00, 2.72e-01

15-Oct-2018 15:00:00, 2.72e-01  
15-Oct-2018 16:00:00, 2.72e-01  
15-Oct-2018 17:00:00, 2.72e-01  
15-Oct-2018 18:00:00, 2.72e-01  
15-Oct-2018 19:00:00, 2.72e-01  
15-Oct-2018 20:00:00, 2.72e-01  
15-Oct-2018 21:00:00, 2.72e-01  
15-Oct-2018 22:00:00, 2.72e-01  
15-Oct-2018 23:00:00, 2.72e-01  
16-Oct-2018, 2.72e-01  
16-Oct-2018 01:00:00, 2.72e-01  
16-Oct-2018 02:00:00, 2.72e-01  
16-Oct-2018 03:00:00, 2.72e-01  
16-Oct-2018 04:00:00, 2.71e-01  
16-Oct-2018 05:00:00, 2.71e-01  
16-Oct-2018 06:00:00, 2.72e-01  
16-Oct-2018 07:00:00, 2.72e-01  
16-Oct-2018 08:00:00, 2.72e-01  
16-Oct-2018 09:00:00, 2.72e-01  
16-Oct-2018 10:00:00, 2.72e-01  
16-Oct-2018 11:00:00, 2.72e-01  
16-Oct-2018 12:00:00, 2.72e-01  
16-Oct-2018 13:00:00, 2.72e-01  
16-Oct-2018 14:00:00, 2.72e-01  
16-Oct-2018 15:00:00, 2.72e-01  
16-Oct-2018 16:00:00, 2.72e-01  
16-Oct-2018 17:00:00, 2.72e-01  
16-Oct-2018 18:00:00, 2.72e-01  
16-Oct-2018 19:00:00, 2.72e-01  
16-Oct-2018 20:00:00, 2.72e-01  
16-Oct-2018 21:00:00, 2.72e-01  
16-Oct-2018 22:00:00, 2.72e-01  
16-Oct-2018 23:00:00, 2.72e-01  
17-Oct-2018, 2.72e-01  
17-Oct-2018 01:00:00, 2.72e-01  
17-Oct-2018 02:00:00, 2.72e-01  
17-Oct-2018 03:00:00, 2.72e-01  
17-Oct-2018 04:00:00, 2.72e-01  
17-Oct-2018 05:00:00, 2.72e-01  
17-Oct-2018 06:00:00, 2.72e-01  
17-Oct-2018 07:00:00, 2.72e-01  
17-Oct-2018 08:00:00, 2.72e-01  
17-Oct-2018 09:00:00, 2.72e-01  
17-Oct-2018 10:00:00, 2.72e-01  
17-Oct-2018 11:00:00, 2.72e-01  
17-Oct-2018 12:00:00, 2.73e-01  
17-Oct-2018 13:00:00, 2.73e-01  
17-Oct-2018 14:00:00, 2.73e-01  
17-Oct-2018 15:00:00, 2.73e-01  
17-Oct-2018 16:00:00, 2.73e-01  
17-Oct-2018 17:00:00, 2.73e-01  
17-Oct-2018 18:00:00, 2.73e-01  
17-Oct-2018 19:00:00, 2.73e-01  
17-Oct-2018 20:00:00, 2.73e-01  
17-Oct-2018 21:00:00, 2.73e-01  
17-Oct-2018 22:00:00, 2.73e-01  
17-Oct-2018 23:00:00, 2.73e-01  
18-Oct-2018, 2.73e-01  
18-Oct-2018 01:00:00, 2.73e-01  
18-Oct-2018 02:00:00, 2.73e-01  
18-Oct-2018 03:00:00, 2.73e-01  
18-Oct-2018 04:00:00, 2.73e-01  
18-Oct-2018 05:00:00, 2.73e-01  
18-Oct-2018 06:00:00, 2.73e-01



18-Oct-2018 07:00:00, 2.73e-01  
18-Oct-2018 08:00:00, 2.73e-01  
18-Oct-2018 09:00:00, 2.73e-01  
18-Oct-2018 10:00:00, 2.73e-01  
18-Oct-2018 11:00:00, 2.74e-01  
18-Oct-2018 12:00:00, 2.74e-01  
18-Oct-2018 13:00:00, 2.74e-01  
18-Oct-2018 14:00:00, 2.74e-01  
18-Oct-2018 15:00:00, 2.74e-01  
18-Oct-2018 16:00:00, 2.74e-01  
18-Oct-2018 17:00:00, 2.74e-01  
18-Oct-2018 18:00:00, 2.75e-01  
18-Oct-2018 19:00:00, 2.75e-01  
18-Oct-2018 20:00:00, 2.76e-01  
18-Oct-2018 21:00:00, 2.77e-01  
18-Oct-2018 22:00:00, 2.77e-01  
18-Oct-2018 23:00:00, 2.78e-01  
19-Oct-2018, 2.79e-01  
19-Oct-2018 01:00:00, 2.79e-01  
19-Oct-2018 02:00:00, 2.79e-01  
19-Oct-2018 03:00:00, 2.80e-01  
19-Oct-2018 04:00:00, 2.80e-01  
19-Oct-2018 05:00:00, 2.80e-01  
19-Oct-2018 06:00:00, 2.81e-01  
19-Oct-2018 07:00:00, 2.81e-01  
19-Oct-2018 08:00:00, 2.81e-01  
19-Oct-2018 09:00:00, 2.81e-01  
19-Oct-2018 10:00:00, 2.82e-01  
19-Oct-2018 11:00:00, 2.82e-01  
19-Oct-2018 12:00:00, 2.82e-01  
19-Oct-2018 13:00:00, 2.82e-01  
19-Oct-2018 14:00:00, 2.82e-01  
19-Oct-2018 15:00:00, 2.82e-01  
19-Oct-2018 16:00:00, 2.83e-01  
19-Oct-2018 17:00:00, 2.83e-01  
19-Oct-2018 18:00:00, 2.83e-01  
19-Oct-2018 19:00:00, 2.82e-01  
19-Oct-2018 20:00:00, 2.82e-01  
19-Oct-2018 21:00:00, 2.83e-01  
19-Oct-2018 22:00:00, 2.83e-01  
19-Oct-2018 23:00:00, 2.83e-01  
20-Oct-2018, 2.83e-01  
20-Oct-2018 01:00:00, 2.83e-01  
20-Oct-2018 02:00:00, 2.83e-01  
20-Oct-2018 03:00:00, 2.83e-01  
20-Oct-2018 04:00:00, 2.83e-01  
20-Oct-2018 05:00:00, 2.83e-01  
20-Oct-2018 06:00:00, 2.83e-01  
20-Oct-2018 07:00:00, 2.83e-01  
20-Oct-2018 08:00:00, 2.83e-01  
20-Oct-2018 09:00:00, 2.83e-01  
20-Oct-2018 10:00:00, 2.83e-01  
20-Oct-2018 11:00:00, 2.83e-01  
20-Oct-2018 12:00:00, 2.83e-01  
20-Oct-2018 13:00:00, 2.83e-01  
20-Oct-2018 14:00:00, 2.84e-01  
20-Oct-2018 15:00:00, 2.84e-01  
20-Oct-2018 16:00:00, 2.84e-01  
20-Oct-2018 17:00:00, 2.84e-01  
20-Oct-2018 18:00:00, 2.84e-01  
20-Oct-2018 19:00:00, 2.84e-01  
20-Oct-2018 20:00:00, 2.83e-01  
20-Oct-2018 21:00:00, 2.83e-01  
20-Oct-2018 22:00:00, 2.83e-01

20-Oct-2018 23:00:00, 2.83e-01  
21-Oct-2018, 2.83e-01  
21-Oct-2018 01:00:00, 2.83e-01  
21-Oct-2018 02:00:00, 2.83e-01  
21-Oct-2018 03:00:00, 2.83e-01  
21-Oct-2018 04:00:00, 2.83e-01  
21-Oct-2018 05:00:00, 2.83e-01  
21-Oct-2018 06:00:00, 2.83e-01  
21-Oct-2018 07:00:00, 2.83e-01  
21-Oct-2018 08:00:00, 2.83e-01  
21-Oct-2018 09:00:00, 2.83e-01  
21-Oct-2018 10:00:00, 2.84e-01  
21-Oct-2018 11:00:00, 2.83e-01  
21-Oct-2018 12:00:00, 2.84e-01  
21-Oct-2018 13:00:00, 2.84e-01  
21-Oct-2018 14:00:00, 2.84e-01  
21-Oct-2018 15:00:00, 2.84e-01  
21-Oct-2018 16:00:00, 2.84e-01  
21-Oct-2018 17:00:00, 2.84e-01  
21-Oct-2018 18:00:00, 2.84e-01  
21-Oct-2018 19:00:00, 2.84e-01  
21-Oct-2018 20:00:00, 2.84e-01  
21-Oct-2018 21:00:00, 2.83e-01  
21-Oct-2018 22:00:00, 2.83e-01  
21-Oct-2018 23:00:00, 2.84e-01  
22-Oct-2018, 2.84e-01  
22-Oct-2018 01:00:00, 2.83e-01  
22-Oct-2018 02:00:00, 2.83e-01  
22-Oct-2018 03:00:00, 2.83e-01  
22-Oct-2018 04:00:00, 2.83e-01  
22-Oct-2018 05:00:00, 2.83e-01  
22-Oct-2018 06:00:00, 2.83e-01  
22-Oct-2018 07:00:00, 2.83e-01  
22-Oct-2018 08:00:00, 2.83e-01  
22-Oct-2018 09:00:00, 2.84e-01  
22-Oct-2018 10:00:00, 2.84e-01  
22-Oct-2018 11:00:00, 2.84e-01  
22-Oct-2018 12:00:00, 2.84e-01  
22-Oct-2018 13:00:00, 2.84e-01  
22-Oct-2018 14:00:00, 2.84e-01  
22-Oct-2018 15:00:00, 2.84e-01  
22-Oct-2018 16:00:00, 2.84e-01  
22-Oct-2018 17:00:00, 2.84e-01  
22-Oct-2018 18:00:00, 2.84e-01  
22-Oct-2018 19:00:00, 2.84e-01  
22-Oct-2018 20:00:00, 2.84e-01  
22-Oct-2018 21:00:00, 2.84e-01  
22-Oct-2018 22:00:00, 2.84e-01  
22-Oct-2018 23:00:00, 2.84e-01  
23-Oct-2018, 2.84e-01  
23-Oct-2018 01:00:00, 2.85e-01  
23-Oct-2018 02:00:00, 2.86e-01  
23-Oct-2018 03:00:00, 2.87e-01  
23-Oct-2018 04:00:00, 2.87e-01  
23-Oct-2018 05:00:00, 2.87e-01  
23-Oct-2018 06:00:00, 2.87e-01  
23-Oct-2018 07:00:00, 2.87e-01  
23-Oct-2018 08:00:00, 2.87e-01  
23-Oct-2018 09:00:00, 2.87e-01  
23-Oct-2018 10:00:00, 2.86e-01  
23-Oct-2018 11:00:00, 2.85e-01  
23-Oct-2018 12:00:00, 2.85e-01  
23-Oct-2018 13:00:00, 2.84e-01  
23-Oct-2018 14:00:00, 2.84e-01

23-Oct-2018 15:00:00, 2.84e-01  
23-Oct-2018 16:00:00, 2.84e-01  
23-Oct-2018 17:00:00, 2.84e-01  
23-Oct-2018 18:00:00, 2.84e-01  
23-Oct-2018 19:00:00, 2.84e-01  
23-Oct-2018 20:00:00, 2.84e-01  
23-Oct-2018 21:00:00, 2.84e-01  
23-Oct-2018 22:00:00, 2.84e-01  
23-Oct-2018 23:00:00, 2.84e-01  
24-Oct-2018, 2.85e-01  
24-Oct-2018 01:00:00, 2.86e-01  
24-Oct-2018 02:00:00, 2.86e-01  
24-Oct-2018 03:00:00, 2.87e-01  
24-Oct-2018 04:00:00, 2.87e-01  
24-Oct-2018 05:00:00, 2.87e-01  
24-Oct-2018 06:00:00, 2.87e-01  
24-Oct-2018 07:00:00, 2.87e-01  
24-Oct-2018 08:00:00, 2.87e-01  
24-Oct-2018 09:00:00, 2.87e-01  
24-Oct-2018 10:00:00, 2.87e-01  
24-Oct-2018 11:00:00, 2.86e-01  
24-Oct-2018 12:00:00, 2.85e-01  
24-Oct-2018 13:00:00, 2.85e-01  
24-Oct-2018 14:00:00, 2.85e-01  
24-Oct-2018 15:00:00, 2.85e-01  
24-Oct-2018 16:00:00, 2.85e-01  
24-Oct-2018 17:00:00, 2.84e-01  
24-Oct-2018 18:00:00, 2.84e-01  
24-Oct-2018 19:00:00, 2.84e-01  
24-Oct-2018 20:00:00, 2.84e-01  
24-Oct-2018 21:00:00, 2.84e-01  
24-Oct-2018 22:00:00, 2.84e-01  
24-Oct-2018 23:00:00, 2.84e-01  
25-Oct-2018, 2.84e-01  
25-Oct-2018 01:00:00, 2.84e-01  
25-Oct-2018 02:00:00, 2.84e-01  
25-Oct-2018 03:00:00, 2.84e-01  
25-Oct-2018 04:00:00, 2.84e-01  
25-Oct-2018 05:00:00, 2.84e-01  
25-Oct-2018 06:00:00, 2.84e-01  
25-Oct-2018 07:00:00, 2.84e-01  
25-Oct-2018 08:00:00, 2.84e-01  
25-Oct-2018 09:00:00, 2.85e-01  
25-Oct-2018 10:00:00, 2.85e-01  
25-Oct-2018 11:00:00, 2.85e-01  
25-Oct-2018 12:00:00, 2.85e-01  
25-Oct-2018 13:00:00, 2.85e-01  
25-Oct-2018 14:00:00, 2.85e-01  
25-Oct-2018 15:00:00, 2.85e-01  
25-Oct-2018 16:00:00, 2.85e-01  
25-Oct-2018 17:00:00, 2.85e-01  
25-Oct-2018 18:00:00, 2.85e-01  
25-Oct-2018 19:00:00, 2.85e-01  
25-Oct-2018 20:00:00, 2.85e-01  
25-Oct-2018 21:00:00, 2.85e-01  
25-Oct-2018 22:00:00, 2.85e-01  
25-Oct-2018 23:00:00, 2.85e-01  
26-Oct-2018, 2.85e-01  
26-Oct-2018 01:00:00, 2.85e-01  
26-Oct-2018 02:00:00, 2.85e-01  
26-Oct-2018 03:00:00, 2.85e-01  
26-Oct-2018 04:00:00, 2.85e-01  
26-Oct-2018 05:00:00, 2.85e-01  
26-Oct-2018 06:00:00, 2.85e-01

26-Oct-2018 07:00:00, 2.85e-01  
26-Oct-2018 08:00:00, 2.85e-01  
26-Oct-2018 09:00:00, 2.85e-01  
26-Oct-2018 10:00:00, 2.85e-01  
26-Oct-2018 11:00:00, 2.85e-01  
26-Oct-2018 12:00:00, 2.85e-01  
26-Oct-2018 13:00:00, 2.85e-01  
26-Oct-2018 14:00:00, 2.85e-01  
26-Oct-2018 15:00:00, 2.85e-01  
26-Oct-2018 16:00:00, 2.85e-01  
26-Oct-2018 17:00:00, 2.85e-01  
26-Oct-2018 18:00:00, 2.85e-01  
26-Oct-2018 19:00:00, 2.85e-01  
26-Oct-2018 20:00:00, 2.85e-01  
26-Oct-2018 21:00:00, 2.85e-01  
26-Oct-2018 22:00:00, 2.85e-01  
26-Oct-2018 23:00:00, 2.85e-01  
27-Oct-2018, 2.85e-01  
27-Oct-2018 01:00:00, 2.85e-01  
27-Oct-2018 02:00:00, 2.85e-01  
27-Oct-2018 03:00:00, 2.85e-01  
27-Oct-2018 04:00:00, 2.85e-01  
27-Oct-2018 05:00:00, 2.85e-01  
27-Oct-2018 06:00:00, 2.85e-01  
27-Oct-2018 07:00:00, 2.85e-01  
27-Oct-2018 08:00:00, 2.85e-01  
27-Oct-2018 09:00:00, 2.85e-01  
27-Oct-2018 10:00:00, 2.85e-01  
27-Oct-2018 11:00:00, 2.85e-01  
27-Oct-2018 12:00:00, 2.85e-01  
27-Oct-2018 13:00:00, 2.85e-01  
27-Oct-2018 14:00:00, 2.85e-01  
27-Oct-2018 15:00:00, 2.85e-01  
27-Oct-2018 16:00:00, 2.85e-01  
27-Oct-2018 17:00:00, 2.85e-01  
27-Oct-2018 18:00:00, 2.85e-01  
27-Oct-2018 19:00:00, 2.85e-01  
27-Oct-2018 20:00:00, 2.85e-01  
27-Oct-2018 21:00:00, 2.85e-01  
27-Oct-2018 22:00:00, 2.85e-01  
27-Oct-2018 23:00:00, 2.85e-01  
28-Oct-2018, 2.85e-01  
28-Oct-2018 01:00:00, 2.85e-01  
28-Oct-2018 02:00:00, 2.85e-01  
28-Oct-2018 03:00:00, 2.85e-01  
28-Oct-2018 04:00:00, 2.85e-01  
28-Oct-2018 05:00:00, 2.85e-01  
28-Oct-2018 06:00:00, 2.85e-01  
28-Oct-2018 07:00:00, 2.85e-01  
28-Oct-2018 08:00:00, 2.85e-01  
28-Oct-2018 09:00:00, 2.85e-01  
28-Oct-2018 10:00:00, 2.85e-01  
28-Oct-2018 11:00:00, 2.85e-01  
28-Oct-2018 12:00:00, 2.85e-01  
28-Oct-2018 13:00:00, 2.85e-01  
28-Oct-2018 14:00:00, 2.85e-01  
28-Oct-2018 15:00:00, 2.85e-01  
28-Oct-2018 16:00:00, 2.85e-01  
28-Oct-2018 17:00:00, 2.85e-01  
28-Oct-2018 18:00:00, 2.85e-01  
28-Oct-2018 19:00:00, 2.85e-01  
28-Oct-2018 20:00:00, 2.85e-01  
28-Oct-2018 21:00:00, 2.85e-01  
28-Oct-2018 22:00:00, 2.85e-01

28-Oct-2018 23:00:00, 2.85e-01  
29-Oct-2018, 2.85e-01  
29-Oct-2018 01:00:00, 2.85e-01  
29-Oct-2018 02:00:00, 2.85e-01  
29-Oct-2018 03:00:00, 2.85e-01  
29-Oct-2018 04:00:00, 2.85e-01  
29-Oct-2018 05:00:00, 2.85e-01  
29-Oct-2018 06:00:00, 2.85e-01  
29-Oct-2018 07:00:00, 2.85e-01  
29-Oct-2018 08:00:00, 2.85e-01  
29-Oct-2018 09:00:00, 2.85e-01  
29-Oct-2018 10:00:00, 2.85e-01  
29-Oct-2018 11:00:00, 2.85e-01  
29-Oct-2018 12:00:00, 2.85e-01  
29-Oct-2018 13:00:00, 2.85e-01  
29-Oct-2018 14:00:00, 2.85e-01  
29-Oct-2018 15:00:00, 2.85e-01  
29-Oct-2018 16:00:00, 2.85e-01  
29-Oct-2018 17:00:00, 2.85e-01  
29-Oct-2018 18:00:00, 2.85e-01  
29-Oct-2018 19:00:00, 2.85e-01  
29-Oct-2018 20:00:00, 2.85e-01  
29-Oct-2018 21:00:00, 2.85e-01  
29-Oct-2018 22:00:00, 2.85e-01  
29-Oct-2018 23:00:00, 2.85e-01  
30-Oct-2018, 2.85e-01  
30-Oct-2018 01:00:00, 2.85e-01  
30-Oct-2018 02:00:00, 2.85e-01  
30-Oct-2018 03:00:00, 2.85e-01  
30-Oct-2018 04:00:00, 2.85e-01  
30-Oct-2018 05:00:00, 2.85e-01  
30-Oct-2018 06:00:00, 2.85e-01  
30-Oct-2018 07:00:00, 2.85e-01  
30-Oct-2018 08:00:00, 2.85e-01  
30-Oct-2018 09:00:00, 2.85e-01  
30-Oct-2018 10:00:00, 2.85e-01  
30-Oct-2018 11:00:00, 2.86e-01  
30-Oct-2018 12:00:00, 2.86e-01  
30-Oct-2018 13:00:00, 2.87e-01  
30-Oct-2018 14:00:00, 2.87e-01  
30-Oct-2018 15:00:00, 2.88e-01  
30-Oct-2018 16:00:00, 2.88e-01  
30-Oct-2018 17:00:00, 2.88e-01  
30-Oct-2018 18:00:00, 2.88e-01  
30-Oct-2018 19:00:00, 2.87e-01  
30-Oct-2018 20:00:00, 2.86e-01  
30-Oct-2018 21:00:00, 2.86e-01  
30-Oct-2018 22:00:00, 2.86e-01  
30-Oct-2018 23:00:00, 2.86e-01  
31-Oct-2018, 2.86e-01  
31-Oct-2018 01:00:00, 2.86e-01  
31-Oct-2018 02:00:00, 2.86e-01  
31-Oct-2018 03:00:00, 2.86e-01  
31-Oct-2018 04:00:00, 2.86e-01  
31-Oct-2018 05:00:00, 2.86e-01  
31-Oct-2018 06:00:00, 2.86e-01  
31-Oct-2018 07:00:00, 2.86e-01  
31-Oct-2018 08:00:00, 2.86e-01  
31-Oct-2018 09:00:00, 2.86e-01  
31-Oct-2018 10:00:00, 2.86e-01  
31-Oct-2018 11:00:00, 2.86e-01  
31-Oct-2018 12:00:00, 2.86e-01  
31-Oct-2018 13:00:00, 2.86e-01  
31-Oct-2018 14:00:00, 2.86e-01

31-Oct-2018 15:00:00, 2.86e-01  
31-Oct-2018 16:00:00, 2.86e-01  
31-Oct-2018 17:00:00, 2.86e-01  
31-Oct-2018 18:00:00, 2.86e-01  
31-Oct-2018 19:00:00, 2.86e-01  
31-Oct-2018 20:00:00, 2.86e-01  
31-Oct-2018 21:00:00, 2.86e-01  
31-Oct-2018 22:00:00, 2.86e-01  
31-Oct-2018 23:00:00, 2.86e-01  
01-Nov-2018, NaN  
01-Nov-2018 01:00:00, NaN  
01-Nov-2018 02:00:00, NaN  
01-Nov-2018 03:00:00, NaN  
01-Nov-2018 04:00:00, NaN  
01-Nov-2018 05:00:00, NaN  
01-Nov-2018 06:00:00, NaN  
01-Nov-2018 07:00:00, NaN  
01-Nov-2018 08:00:00, NaN  
01-Nov-2018 09:00:00, NaN  
01-Nov-2018 10:00:00, NaN  
01-Nov-2018 11:00:00, NaN  
01-Nov-2018 12:00:00, NaN  
01-Nov-2018 13:00:00, NaN  
01-Nov-2018 14:00:00, NaN  
01-Nov-2018 15:00:00, NaN  
01-Nov-2018 16:00:00, NaN  
01-Nov-2018 17:00:00, NaN  
01-Nov-2018 18:00:00, NaN  
01-Nov-2018 19:00:00, NaN  
01-Nov-2018 20:00:00, NaN  
01-Nov-2018 21:00:00, NaN  
01-Nov-2018 22:00:00, NaN  
01-Nov-2018 23:00:00, NaN  
02-Nov-2018, NaN  
02-Nov-2018 01:00:00, NaN  
02-Nov-2018 02:00:00, NaN  
02-Nov-2018 03:00:00, NaN  
02-Nov-2018 04:00:00, NaN  
02-Nov-2018 05:00:00, NaN  
02-Nov-2018 06:00:00, NaN  
02-Nov-2018 07:00:00, NaN  
02-Nov-2018 08:00:00, NaN  
02-Nov-2018 09:00:00, NaN  
02-Nov-2018 10:00:00, NaN  
02-Nov-2018 11:00:00, NaN  
02-Nov-2018 12:00:00, NaN  
02-Nov-2018 13:00:00, NaN  
02-Nov-2018 14:00:00, NaN  
02-Nov-2018 15:00:00, NaN  
02-Nov-2018 16:00:00, NaN  
02-Nov-2018 17:00:00, NaN  
02-Nov-2018 18:00:00, NaN  
02-Nov-2018 19:00:00, NaN  
02-Nov-2018 20:00:00, NaN  
02-Nov-2018 21:00:00, NaN  
02-Nov-2018 22:00:00, NaN  
02-Nov-2018 23:00:00, NaN  
03-Nov-2018, NaN  
03-Nov-2018 01:00:00, NaN  
03-Nov-2018 02:00:00, NaN  
03-Nov-2018 03:00:00, NaN  
03-Nov-2018 04:00:00, NaN  
03-Nov-2018 05:00:00, NaN  
03-Nov-2018 06:00:00, NaN

|              |           |     |
|--------------|-----------|-----|
| 03-Nov-2018  | 07:00:00, | NaN |
| 03-Nov-2018  | 08:00:00, | NaN |
| 03-Nov-2018  | 09:00:00, | NaN |
| 03-Nov-2018  | 10:00:00, | NaN |
| 03-Nov-2018  | 11:00:00, | NaN |
| 03-Nov-2018  | 12:00:00, | NaN |
| 03-Nov-2018  | 13:00:00, | NaN |
| 03-Nov-2018  | 14:00:00, | NaN |
| 03-Nov-2018  | 15:00:00, | NaN |
| 03-Nov-2018  | 16:00:00, | NaN |
| 03-Nov-2018  | 17:00:00, | NaN |
| 03-Nov-2018  | 18:00:00, | NaN |
| 03-Nov-2018  | 19:00:00, | NaN |
| 03-Nov-2018  | 20:00:00, | NaN |
| 03-Nov-2018  | 21:00:00, | NaN |
| 03-Nov-2018  | 22:00:00, | NaN |
| 03-Nov-2018  | 23:00:00, | NaN |
| 04-Nov-2018, |           | NaN |
| 04-Nov-2018  | 01:00:00, | NaN |
| 04-Nov-2018  | 02:00:00, | NaN |
| 04-Nov-2018  | 03:00:00, | NaN |
| 04-Nov-2018  | 04:00:00, | NaN |
| 04-Nov-2018  | 05:00:00, | NaN |
| 04-Nov-2018  | 06:00:00, | NaN |
| 04-Nov-2018  | 07:00:00, | NaN |
| 04-Nov-2018  | 08:00:00, | NaN |
| 04-Nov-2018  | 09:00:00, | NaN |
| 04-Nov-2018  | 10:00:00, | NaN |
| 04-Nov-2018  | 11:00:00, | NaN |
| 04-Nov-2018  | 12:00:00, | NaN |
| 04-Nov-2018  | 13:00:00, | NaN |
| 04-Nov-2018  | 14:00:00, | NaN |
| 04-Nov-2018  | 15:00:00, | NaN |
| 04-Nov-2018  | 16:00:00, | NaN |
| 04-Nov-2018  | 17:00:00, | NaN |
| 04-Nov-2018  | 18:00:00, | NaN |
| 04-Nov-2018  | 19:00:00, | NaN |
| 04-Nov-2018  | 20:00:00, | NaN |
| 04-Nov-2018  | 21:00:00, | NaN |
| 04-Nov-2018  | 22:00:00, | NaN |
| 04-Nov-2018  | 23:00:00, | NaN |
| 05-Nov-2018, |           | NaN |
| 05-Nov-2018  | 01:00:00, | NaN |
| 05-Nov-2018  | 02:00:00, | NaN |
| 05-Nov-2018  | 03:00:00, | NaN |
| 05-Nov-2018  | 04:00:00, | NaN |
| 05-Nov-2018  | 05:00:00, | NaN |
| 05-Nov-2018  | 06:00:00, | NaN |
| 05-Nov-2018  | 07:00:00, | NaN |
| 05-Nov-2018  | 08:00:00, | NaN |
| 05-Nov-2018  | 09:00:00, | NaN |
| 05-Nov-2018  | 10:00:00, | NaN |
| 05-Nov-2018  | 11:00:00, | NaN |
| 05-Nov-2018  | 12:00:00, | NaN |
| 05-Nov-2018  | 13:00:00, | NaN |
| 05-Nov-2018  | 14:00:00, | NaN |
| 05-Nov-2018  | 15:00:00, | NaN |
| 05-Nov-2018  | 16:00:00, | NaN |
| 05-Nov-2018  | 17:00:00, | NaN |
| 05-Nov-2018  | 18:00:00, | NaN |
| 05-Nov-2018  | 19:00:00, | NaN |
| 05-Nov-2018  | 20:00:00, | NaN |
| 05-Nov-2018  | 21:00:00, | NaN |
| 05-Nov-2018  | 22:00:00, | NaN |

05-Nov-2018 23:00:00, NaN  
06-Nov-2018, NaN  
06-Nov-2018 01:00:00, NaN  
06-Nov-2018 02:00:00, NaN  
06-Nov-2018 03:00:00, NaN  
06-Nov-2018 04:00:00, NaN  
06-Nov-2018 05:00:00, NaN  
06-Nov-2018 06:00:00, NaN  
06-Nov-2018 07:00:00, NaN  
06-Nov-2018 08:00:00, NaN  
06-Nov-2018 09:00:00, NaN  
06-Nov-2018 10:00:00, NaN  
06-Nov-2018 11:00:00, NaN  
06-Nov-2018 12:00:00, NaN  
06-Nov-2018 13:00:00, NaN  
06-Nov-2018 14:00:00, NaN  
06-Nov-2018 15:00:00, NaN  
06-Nov-2018 16:00:00, NaN  
06-Nov-2018 17:00:00, NaN  
06-Nov-2018 18:00:00, NaN  
06-Nov-2018 19:00:00, NaN  
06-Nov-2018 20:00:00, NaN  
06-Nov-2018 21:00:00, NaN  
06-Nov-2018 22:00:00, NaN  
06-Nov-2018 23:00:00, NaN  
07-Nov-2018, NaN  
07-Nov-2018 01:00:00, NaN  
07-Nov-2018 02:00:00, NaN  
07-Nov-2018 03:00:00, NaN  
07-Nov-2018 04:00:00, NaN  
07-Nov-2018 05:00:00, NaN  
07-Nov-2018 06:00:00, NaN  
07-Nov-2018 07:00:00, NaN  
07-Nov-2018 08:00:00, NaN  
07-Nov-2018 09:00:00, NaN  
07-Nov-2018 10:00:00, NaN  
07-Nov-2018 11:00:00, NaN  
07-Nov-2018 12:00:00, NaN  
07-Nov-2018 13:00:00, NaN  
07-Nov-2018 14:00:00, NaN  
07-Nov-2018 15:00:00, NaN  
07-Nov-2018 16:00:00, NaN  
07-Nov-2018 17:00:00, NaN  
07-Nov-2018 18:00:00, NaN  
07-Nov-2018 19:00:00, NaN  
07-Nov-2018 20:00:00, NaN  
07-Nov-2018 21:00:00, NaN  
07-Nov-2018 22:00:00, NaN  
07-Nov-2018 23:00:00, NaN  
08-Nov-2018, NaN  
08-Nov-2018 01:00:00, NaN  
08-Nov-2018 02:00:00, NaN  
08-Nov-2018 03:00:00, NaN  
08-Nov-2018 04:00:00, NaN  
08-Nov-2018 05:00:00, NaN  
08-Nov-2018 06:00:00, NaN  
08-Nov-2018 07:00:00, NaN  
08-Nov-2018 08:00:00, NaN  
08-Nov-2018 09:00:00, NaN  
08-Nov-2018 10:00:00, NaN  
08-Nov-2018 11:00:00, NaN  
08-Nov-2018 12:00:00, NaN  
08-Nov-2018 13:00:00, NaN  
08-Nov-2018 14:00:00, NaN



08-Nov-2018 15:00:00, NaN  
08-Nov-2018 16:00:00, NaN  
08-Nov-2018 17:00:00, NaN  
08-Nov-2018 18:00:00, NaN  
08-Nov-2018 19:00:00, NaN  
08-Nov-2018 20:00:00, NaN  
08-Nov-2018 21:00:00, NaN  
08-Nov-2018 22:00:00, NaN  
08-Nov-2018 23:00:00, NaN  
09-Nov-2018, NaN  
09-Nov-2018 01:00:00, NaN  
09-Nov-2018 02:00:00, NaN  
09-Nov-2018 03:00:00, NaN  
09-Nov-2018 04:00:00, NaN  
09-Nov-2018 05:00:00, NaN  
09-Nov-2018 06:00:00, NaN  
09-Nov-2018 07:00:00, NaN  
09-Nov-2018 08:00:00, NaN  
09-Nov-2018 09:00:00, NaN  
09-Nov-2018 10:00:00, NaN  
09-Nov-2018 11:00:00, NaN  
09-Nov-2018 12:00:00, NaN  
09-Nov-2018 13:00:00, NaN  
09-Nov-2018 14:00:00, NaN  
09-Nov-2018 15:00:00, NaN  
09-Nov-2018 16:00:00, NaN  
09-Nov-2018 17:00:00, NaN  
09-Nov-2018 18:00:00, NaN  
09-Nov-2018 19:00:00, NaN  
09-Nov-2018 20:00:00, NaN  
09-Nov-2018 21:00:00, NaN  
09-Nov-2018 22:00:00, NaN  
09-Nov-2018 23:00:00, NaN  
10-Nov-2018, NaN  
10-Nov-2018 01:00:00, NaN  
10-Nov-2018 02:00:00, NaN  
10-Nov-2018 03:00:00, NaN  
10-Nov-2018 04:00:00, NaN  
10-Nov-2018 05:00:00, NaN  
10-Nov-2018 06:00:00, NaN  
10-Nov-2018 07:00:00, NaN  
10-Nov-2018 08:00:00, NaN  
10-Nov-2018 09:00:00, NaN  
10-Nov-2018 10:00:00, NaN  
10-Nov-2018 11:00:00, NaN  
10-Nov-2018 12:00:00, NaN  
10-Nov-2018 13:00:00, NaN  
10-Nov-2018 14:00:00, NaN  
10-Nov-2018 15:00:00, NaN  
10-Nov-2018 16:00:00, NaN  
10-Nov-2018 17:00:00, NaN  
10-Nov-2018 18:00:00, NaN  
10-Nov-2018 19:00:00, NaN  
10-Nov-2018 20:00:00, NaN  
10-Nov-2018 21:00:00, NaN  
10-Nov-2018 22:00:00, NaN  
10-Nov-2018 23:00:00, NaN  
11-Nov-2018, NaN  
11-Nov-2018 01:00:00, NaN  
11-Nov-2018 02:00:00, NaN  
11-Nov-2018 03:00:00, NaN  
11-Nov-2018 04:00:00, NaN  
11-Nov-2018 05:00:00, NaN  
11-Nov-2018 06:00:00, NaN

|              |           |     |
|--------------|-----------|-----|
| 11-Nov-2018  | 07:00:00, | NaN |
| 11-Nov-2018  | 08:00:00, | NaN |
| 11-Nov-2018  | 09:00:00, | NaN |
| 11-Nov-2018  | 10:00:00, | NaN |
| 11-Nov-2018  | 11:00:00, | NaN |
| 11-Nov-2018  | 12:00:00, | NaN |
| 11-Nov-2018  | 13:00:00, | NaN |
| 11-Nov-2018  | 14:00:00, | NaN |
| 11-Nov-2018  | 15:00:00, | NaN |
| 11-Nov-2018  | 16:00:00, | NaN |
| 11-Nov-2018  | 17:00:00, | NaN |
| 11-Nov-2018  | 18:00:00, | NaN |
| 11-Nov-2018  | 19:00:00, | NaN |
| 11-Nov-2018  | 20:00:00, | NaN |
| 11-Nov-2018  | 21:00:00, | NaN |
| 11-Nov-2018  | 22:00:00, | NaN |
| 11-Nov-2018  | 23:00:00, | NaN |
| 12-Nov-2018, |           | NaN |
| 12-Nov-2018  | 01:00:00, | NaN |
| 12-Nov-2018  | 02:00:00, | NaN |
| 12-Nov-2018  | 03:00:00, | NaN |
| 12-Nov-2018  | 04:00:00, | NaN |
| 12-Nov-2018  | 05:00:00, | NaN |
| 12-Nov-2018  | 06:00:00, | NaN |
| 12-Nov-2018  | 07:00:00, | NaN |
| 12-Nov-2018  | 08:00:00, | NaN |
| 12-Nov-2018  | 09:00:00, | NaN |
| 12-Nov-2018  | 10:00:00, | NaN |
| 12-Nov-2018  | 11:00:00, | NaN |
| 12-Nov-2018  | 12:00:00, | NaN |
| 12-Nov-2018  | 13:00:00, | NaN |
| 12-Nov-2018  | 14:00:00, | NaN |
| 12-Nov-2018  | 15:00:00, | NaN |
| 12-Nov-2018  | 16:00:00, | NaN |
| 12-Nov-2018  | 17:00:00, | NaN |
| 12-Nov-2018  | 18:00:00, | NaN |
| 12-Nov-2018  | 19:00:00, | NaN |
| 12-Nov-2018  | 20:00:00, | NaN |
| 12-Nov-2018  | 21:00:00, | NaN |
| 12-Nov-2018  | 22:00:00, | NaN |
| 12-Nov-2018  | 23:00:00, | NaN |
| 13-Nov-2018, |           | NaN |
| 13-Nov-2018  | 01:00:00, | NaN |
| 13-Nov-2018  | 02:00:00, | NaN |
| 13-Nov-2018  | 03:00:00, | NaN |
| 13-Nov-2018  | 04:00:00, | NaN |
| 13-Nov-2018  | 05:00:00, | NaN |
| 13-Nov-2018  | 06:00:00, | NaN |
| 13-Nov-2018  | 07:00:00, | NaN |
| 13-Nov-2018  | 08:00:00, | NaN |
| 13-Nov-2018  | 09:00:00, | NaN |
| 13-Nov-2018  | 10:00:00, | NaN |
| 13-Nov-2018  | 11:00:00, | NaN |
| 13-Nov-2018  | 12:00:00, | NaN |
| 13-Nov-2018  | 13:00:00, | NaN |
| 13-Nov-2018  | 14:00:00, | NaN |
| 13-Nov-2018  | 15:00:00, | NaN |
| 13-Nov-2018  | 16:00:00, | NaN |
| 13-Nov-2018  | 17:00:00, | NaN |
| 13-Nov-2018  | 18:00:00, | NaN |
| 13-Nov-2018  | 19:00:00, | NaN |
| 13-Nov-2018  | 20:00:00, | NaN |
| 13-Nov-2018  | 21:00:00, | NaN |
| 13-Nov-2018  | 22:00:00, | NaN |

13-Nov-2018 23:00:00, NaN  
14-Nov-2018, NaN  
14-Nov-2018 01:00:00, NaN  
14-Nov-2018 02:00:00, NaN  
14-Nov-2018 03:00:00, NaN  
14-Nov-2018 04:00:00, NaN  
14-Nov-2018 05:00:00, NaN  
14-Nov-2018 06:00:00, NaN  
14-Nov-2018 07:00:00, NaN  
14-Nov-2018 08:00:00, NaN  
14-Nov-2018 09:00:00, NaN  
14-Nov-2018 10:00:00, NaN  
14-Nov-2018 11:00:00, NaN  
14-Nov-2018 12:00:00, NaN  
14-Nov-2018 13:00:00, NaN  
14-Nov-2018 14:00:00, NaN  
14-Nov-2018 15:00:00, NaN  
14-Nov-2018 16:00:00, NaN  
14-Nov-2018 17:00:00, NaN  
14-Nov-2018 18:00:00, NaN  
14-Nov-2018 19:00:00, NaN  
14-Nov-2018 20:00:00, NaN  
14-Nov-2018 21:00:00, NaN  
14-Nov-2018 22:00:00, NaN  
14-Nov-2018 23:00:00, NaN  
15-Nov-2018, NaN  
15-Nov-2018 01:00:00, NaN  
15-Nov-2018 02:00:00, NaN  
15-Nov-2018 03:00:00, NaN  
15-Nov-2018 04:00:00, NaN  
15-Nov-2018 05:00:00, NaN  
15-Nov-2018 06:00:00, NaN  
15-Nov-2018 07:00:00, NaN  
15-Nov-2018 08:00:00, NaN  
15-Nov-2018 09:00:00, NaN  
15-Nov-2018 10:00:00, NaN  
15-Nov-2018 11:00:00, NaN  
15-Nov-2018 12:00:00, NaN  
15-Nov-2018 13:00:00, NaN  
15-Nov-2018 14:00:00, NaN  
15-Nov-2018 15:00:00, NaN  
15-Nov-2018 16:00:00, NaN  
15-Nov-2018 17:00:00, NaN  
15-Nov-2018 18:00:00, NaN  
15-Nov-2018 19:00:00, NaN  
15-Nov-2018 20:00:00, NaN  
15-Nov-2018 21:00:00, NaN  
15-Nov-2018 22:00:00, NaN  
15-Nov-2018 23:00:00, NaN  
16-Nov-2018, NaN  
16-Nov-2018 01:00:00, NaN  
16-Nov-2018 02:00:00, NaN  
16-Nov-2018 03:00:00, NaN  
16-Nov-2018 04:00:00, NaN  
16-Nov-2018 05:00:00, NaN  
16-Nov-2018 06:00:00, NaN  
16-Nov-2018 07:00:00, NaN  
16-Nov-2018 08:00:00, NaN  
16-Nov-2018 09:00:00, NaN  
16-Nov-2018 10:00:00, NaN  
16-Nov-2018 11:00:00, NaN  
16-Nov-2018 12:00:00, NaN  
16-Nov-2018 13:00:00, NaN  
16-Nov-2018 14:00:00, NaN

16-Nov-2018 15:00:00, NaN  
16-Nov-2018 16:00:00, NaN  
16-Nov-2018 17:00:00, NaN  
16-Nov-2018 18:00:00, NaN  
16-Nov-2018 19:00:00, NaN  
16-Nov-2018 20:00:00, NaN  
16-Nov-2018 21:00:00, NaN  
16-Nov-2018 22:00:00, NaN  
16-Nov-2018 23:00:00, NaN  
17-Nov-2018, NaN  
17-Nov-2018 01:00:00, NaN  
17-Nov-2018 02:00:00, NaN  
17-Nov-2018 03:00:00, NaN  
17-Nov-2018 04:00:00, NaN  
17-Nov-2018 05:00:00, NaN  
17-Nov-2018 06:00:00, NaN  
17-Nov-2018 07:00:00, NaN  
17-Nov-2018 08:00:00, NaN  
17-Nov-2018 09:00:00, NaN  
17-Nov-2018 10:00:00, NaN  
17-Nov-2018 11:00:00, NaN  
17-Nov-2018 12:00:00, NaN  
17-Nov-2018 13:00:00, NaN  
17-Nov-2018 14:00:00, NaN  
17-Nov-2018 15:00:00, NaN  
17-Nov-2018 16:00:00, NaN  
17-Nov-2018 17:00:00, NaN  
17-Nov-2018 18:00:00, NaN  
17-Nov-2018 19:00:00, NaN  
17-Nov-2018 20:00:00, NaN  
17-Nov-2018 21:00:00, NaN  
17-Nov-2018 22:00:00, NaN  
17-Nov-2018 23:00:00, NaN  
18-Nov-2018, NaN  
18-Nov-2018 01:00:00, NaN  
18-Nov-2018 02:00:00, NaN  
18-Nov-2018 03:00:00, NaN  
18-Nov-2018 04:00:00, NaN  
18-Nov-2018 05:00:00, NaN  
18-Nov-2018 06:00:00, NaN  
18-Nov-2018 07:00:00, NaN  
18-Nov-2018 08:00:00, NaN  
18-Nov-2018 09:00:00, NaN  
18-Nov-2018 10:00:00, NaN  
18-Nov-2018 11:00:00, NaN  
18-Nov-2018 12:00:00, NaN  
18-Nov-2018 13:00:00, NaN  
18-Nov-2018 14:00:00, NaN  
18-Nov-2018 15:00:00, NaN  
18-Nov-2018 16:00:00, NaN  
18-Nov-2018 17:00:00, NaN  
18-Nov-2018 18:00:00, NaN  
18-Nov-2018 19:00:00, NaN  
18-Nov-2018 20:00:00, NaN  
18-Nov-2018 21:00:00, NaN  
18-Nov-2018 22:00:00, NaN  
18-Nov-2018 23:00:00, NaN  
19-Nov-2018, NaN  
19-Nov-2018 01:00:00, NaN  
19-Nov-2018 02:00:00, NaN  
19-Nov-2018 03:00:00, NaN  
19-Nov-2018 04:00:00, NaN  
19-Nov-2018 05:00:00, NaN  
19-Nov-2018 06:00:00, NaN

19-Nov-2018 07:00:00, NaN  
19-Nov-2018 08:00:00, NaN  
19-Nov-2018 09:00:00, NaN  
19-Nov-2018 10:00:00, NaN  
19-Nov-2018 11:00:00, NaN  
19-Nov-2018 12:00:00, NaN  
19-Nov-2018 13:00:00, NaN  
19-Nov-2018 14:00:00, NaN  
19-Nov-2018 15:00:00, NaN  
19-Nov-2018 16:00:00, NaN  
19-Nov-2018 17:00:00, NaN  
19-Nov-2018 18:00:00, NaN  
19-Nov-2018 19:00:00, NaN  
19-Nov-2018 20:00:00, NaN  
19-Nov-2018 21:00:00, NaN  
19-Nov-2018 22:00:00, NaN  
19-Nov-2018 23:00:00, NaN  
20-Nov-2018, NaN  
20-Nov-2018 01:00:00, NaN  
20-Nov-2018 02:00:00, NaN  
20-Nov-2018 03:00:00, NaN  
20-Nov-2018 04:00:00, NaN  
20-Nov-2018 05:00:00, NaN  
20-Nov-2018 06:00:00, NaN  
20-Nov-2018 07:00:00, NaN  
20-Nov-2018 08:00:00, NaN  
20-Nov-2018 09:00:00, NaN  
20-Nov-2018 10:00:00, NaN  
20-Nov-2018 11:00:00, NaN  
20-Nov-2018 12:00:00, NaN  
20-Nov-2018 13:00:00, NaN  
20-Nov-2018 14:00:00, NaN  
20-Nov-2018 15:00:00, NaN  
20-Nov-2018 16:00:00, NaN  
20-Nov-2018 17:00:00, NaN  
20-Nov-2018 18:00:00, NaN  
20-Nov-2018 19:00:00, NaN  
20-Nov-2018 20:00:00, NaN  
20-Nov-2018 21:00:00, NaN  
20-Nov-2018 22:00:00, NaN  
20-Nov-2018 23:00:00, NaN  
21-Nov-2018, NaN  
21-Nov-2018 01:00:00, NaN  
21-Nov-2018 02:00:00, NaN  
21-Nov-2018 03:00:00, NaN  
21-Nov-2018 04:00:00, NaN  
21-Nov-2018 05:00:00, NaN  
21-Nov-2018 06:00:00, NaN  
21-Nov-2018 07:00:00, NaN  
21-Nov-2018 08:00:00, NaN  
21-Nov-2018 09:00:00, NaN  
21-Nov-2018 10:00:00, NaN  
21-Nov-2018 11:00:00, NaN  
21-Nov-2018 12:00:00, NaN  
21-Nov-2018 13:00:00, NaN  
21-Nov-2018 14:00:00, NaN  
21-Nov-2018 15:00:00, NaN  
21-Nov-2018 16:00:00, NaN  
21-Nov-2018 17:00:00, NaN  
21-Nov-2018 18:00:00, NaN  
21-Nov-2018 19:00:00, NaN  
21-Nov-2018 20:00:00, NaN  
21-Nov-2018 21:00:00, NaN  
21-Nov-2018 22:00:00, NaN

21-Nov-2018 23:00:00, NaN  
22-Nov-2018, NaN  
22-Nov-2018 01:00:00, NaN  
22-Nov-2018 02:00:00, NaN  
22-Nov-2018 03:00:00, NaN  
22-Nov-2018 04:00:00, NaN  
22-Nov-2018 05:00:00, NaN  
22-Nov-2018 06:00:00, NaN  
22-Nov-2018 07:00:00, NaN  
22-Nov-2018 08:00:00, NaN  
22-Nov-2018 09:00:00, NaN  
22-Nov-2018 10:00:00, NaN  
22-Nov-2018 11:00:00, NaN  
22-Nov-2018 12:00:00, NaN  
22-Nov-2018 13:00:00, NaN  
22-Nov-2018 14:00:00, NaN  
22-Nov-2018 15:00:00, NaN  
22-Nov-2018 16:00:00, NaN  
22-Nov-2018 17:00:00, NaN  
22-Nov-2018 18:00:00, NaN  
22-Nov-2018 19:00:00, NaN  
22-Nov-2018 20:00:00, NaN  
22-Nov-2018 21:00:00, NaN  
22-Nov-2018 22:00:00, NaN  
22-Nov-2018 23:00:00, NaN  
23-Nov-2018, NaN  
23-Nov-2018 01:00:00, NaN  
23-Nov-2018 02:00:00, NaN  
23-Nov-2018 03:00:00, NaN  
23-Nov-2018 04:00:00, NaN  
23-Nov-2018 05:00:00, NaN  
23-Nov-2018 06:00:00, NaN  
23-Nov-2018 07:00:00, NaN  
23-Nov-2018 08:00:00, NaN  
23-Nov-2018 09:00:00, NaN  
23-Nov-2018 10:00:00, NaN  
23-Nov-2018 11:00:00, NaN  
23-Nov-2018 12:00:00, NaN  
23-Nov-2018 13:00:00, NaN  
23-Nov-2018 14:00:00, NaN  
23-Nov-2018 15:00:00, NaN  
23-Nov-2018 16:00:00, NaN  
23-Nov-2018 17:00:00, NaN  
23-Nov-2018 18:00:00, NaN  
23-Nov-2018 19:00:00, NaN  
23-Nov-2018 20:00:00, NaN  
23-Nov-2018 21:00:00, NaN  
23-Nov-2018 22:00:00, NaN  
23-Nov-2018 23:00:00, NaN  
24-Nov-2018, NaN  
24-Nov-2018 01:00:00, NaN  
24-Nov-2018 02:00:00, NaN  
24-Nov-2018 03:00:00, NaN  
24-Nov-2018 04:00:00, NaN  
24-Nov-2018 05:00:00, NaN  
24-Nov-2018 06:00:00, NaN  
24-Nov-2018 07:00:00, NaN  
24-Nov-2018 08:00:00, NaN  
24-Nov-2018 09:00:00, NaN  
24-Nov-2018 10:00:00, NaN  
24-Nov-2018 11:00:00, NaN  
24-Nov-2018 12:00:00, NaN  
24-Nov-2018 13:00:00, NaN  
24-Nov-2018 14:00:00, NaN

|              |           |     |
|--------------|-----------|-----|
| 24-Nov-2018  | 15:00:00, | NaN |
| 24-Nov-2018  | 16:00:00, | NaN |
| 24-Nov-2018  | 17:00:00, | NaN |
| 24-Nov-2018  | 18:00:00, | NaN |
| 24-Nov-2018  | 19:00:00, | NaN |
| 24-Nov-2018  | 20:00:00, | NaN |
| 24-Nov-2018  | 21:00:00, | NaN |
| 24-Nov-2018  | 22:00:00, | NaN |
| 24-Nov-2018  | 23:00:00, | NaN |
| 25-Nov-2018, | NaN       |     |
| 25-Nov-2018  | 01:00:00, | NaN |
| 25-Nov-2018  | 02:00:00, | NaN |
| 25-Nov-2018  | 03:00:00, | NaN |
| 25-Nov-2018  | 04:00:00, | NaN |
| 25-Nov-2018  | 05:00:00, | NaN |
| 25-Nov-2018  | 06:00:00, | NaN |
| 25-Nov-2018  | 07:00:00, | NaN |
| 25-Nov-2018  | 08:00:00, | NaN |
| 25-Nov-2018  | 09:00:00, | NaN |
| 25-Nov-2018  | 10:00:00, | NaN |
| 25-Nov-2018  | 11:00:00, | NaN |
| 25-Nov-2018  | 12:00:00, | NaN |
| 25-Nov-2018  | 13:00:00, | NaN |
| 25-Nov-2018  | 14:00:00, | NaN |
| 25-Nov-2018  | 15:00:00, | NaN |
| 25-Nov-2018  | 16:00:00, | NaN |
| 25-Nov-2018  | 17:00:00, | NaN |
| 25-Nov-2018  | 18:00:00, | NaN |
| 25-Nov-2018  | 19:00:00, | NaN |
| 25-Nov-2018  | 20:00:00, | NaN |
| 25-Nov-2018  | 21:00:00, | NaN |
| 25-Nov-2018  | 22:00:00, | NaN |
| 25-Nov-2018  | 23:00:00, | NaN |
| 26-Nov-2018, | NaN       |     |
| 26-Nov-2018  | 01:00:00, | NaN |
| 26-Nov-2018  | 02:00:00, | NaN |
| 26-Nov-2018  | 03:00:00, | NaN |
| 26-Nov-2018  | 04:00:00, | NaN |
| 26-Nov-2018  | 05:00:00, | NaN |
| 26-Nov-2018  | 06:00:00, | NaN |
| 26-Nov-2018  | 07:00:00, | NaN |
| 26-Nov-2018  | 08:00:00, | NaN |
| 26-Nov-2018  | 09:00:00, | NaN |
| 26-Nov-2018  | 10:00:00, | NaN |
| 26-Nov-2018  | 11:00:00, | NaN |
| 26-Nov-2018  | 12:00:00, | NaN |
| 26-Nov-2018  | 13:00:00, | NaN |
| 26-Nov-2018  | 14:00:00, | NaN |
| 26-Nov-2018  | 15:00:00, | NaN |
| 26-Nov-2018  | 16:00:00, | NaN |
| 26-Nov-2018  | 17:00:00, | NaN |
| 26-Nov-2018  | 18:00:00, | NaN |
| 26-Nov-2018  | 19:00:00, | NaN |
| 26-Nov-2018  | 20:00:00, | NaN |
| 26-Nov-2018  | 21:00:00, | NaN |
| 26-Nov-2018  | 22:00:00, | NaN |
| 26-Nov-2018  | 23:00:00, | NaN |
| 27-Nov-2018, | NaN       |     |
| 27-Nov-2018  | 01:00:00, | NaN |
| 27-Nov-2018  | 02:00:00, | NaN |
| 27-Nov-2018  | 03:00:00, | NaN |
| 27-Nov-2018  | 04:00:00, | NaN |
| 27-Nov-2018  | 05:00:00, | NaN |
| 27-Nov-2018  | 06:00:00, | NaN |

27-Nov-2018 07:00:00, NaN  
27-Nov-2018 08:00:00, NaN  
27-Nov-2018 09:00:00, NaN  
27-Nov-2018 10:00:00, NaN  
27-Nov-2018 11:00:00, NaN  
27-Nov-2018 12:00:00, NaN  
27-Nov-2018 13:00:00, NaN  
27-Nov-2018 14:00:00, NaN  
27-Nov-2018 15:00:00, NaN  
27-Nov-2018 16:00:00, NaN  
27-Nov-2018 17:00:00, NaN  
27-Nov-2018 18:00:00, NaN  
27-Nov-2018 19:00:00, NaN  
27-Nov-2018 20:00:00, NaN  
27-Nov-2018 21:00:00, NaN  
27-Nov-2018 22:00:00, NaN  
27-Nov-2018 23:00:00, NaN  
28-Nov-2018, NaN  
28-Nov-2018 01:00:00, NaN  
28-Nov-2018 02:00:00, NaN  
28-Nov-2018 03:00:00, NaN  
28-Nov-2018 04:00:00, NaN  
28-Nov-2018 05:00:00, NaN  
28-Nov-2018 06:00:00, NaN  
28-Nov-2018 07:00:00, NaN  
28-Nov-2018 08:00:00, NaN  
28-Nov-2018 09:00:00, NaN  
28-Nov-2018 10:00:00, NaN  
28-Nov-2018 11:00:00, NaN  
28-Nov-2018 12:00:00, NaN  
28-Nov-2018 13:00:00, NaN  
28-Nov-2018 14:00:00, NaN  
28-Nov-2018 15:00:00, NaN  
28-Nov-2018 16:00:00, NaN  
28-Nov-2018 17:00:00, NaN  
28-Nov-2018 18:00:00, NaN  
28-Nov-2018 19:00:00, NaN  
28-Nov-2018 20:00:00, NaN  
28-Nov-2018 21:00:00, NaN  
28-Nov-2018 22:00:00, NaN  
28-Nov-2018 23:00:00, NaN  
29-Nov-2018, NaN  
29-Nov-2018 01:00:00, NaN  
29-Nov-2018 02:00:00, NaN  
29-Nov-2018 03:00:00, NaN  
29-Nov-2018 04:00:00, NaN  
29-Nov-2018 05:00:00, NaN  
29-Nov-2018 06:00:00, NaN  
29-Nov-2018 07:00:00, NaN  
29-Nov-2018 08:00:00, NaN  
29-Nov-2018 09:00:00, NaN  
29-Nov-2018 10:00:00, NaN  
29-Nov-2018 11:00:00, NaN  
29-Nov-2018 12:00:00, NaN  
29-Nov-2018 13:00:00, NaN  
29-Nov-2018 14:00:00, NaN  
29-Nov-2018 15:00:00, NaN  
29-Nov-2018 16:00:00, NaN  
29-Nov-2018 17:00:00, NaN  
29-Nov-2018 18:00:00, NaN  
29-Nov-2018 19:00:00, NaN  
29-Nov-2018 20:00:00, NaN  
29-Nov-2018 21:00:00, NaN  
29-Nov-2018 22:00:00, NaN



29-Nov-2018 23:00:00, NaN  
30-Nov-2018, NaN  
30-Nov-2018 01:00:00, NaN  
30-Nov-2018 02:00:00, NaN  
30-Nov-2018 03:00:00, NaN  
30-Nov-2018 04:00:00, NaN  
30-Nov-2018 05:00:00, NaN  
30-Nov-2018 06:00:00, NaN  
30-Nov-2018 07:00:00, NaN  
30-Nov-2018 08:00:00, NaN  
30-Nov-2018 09:00:00, NaN  
30-Nov-2018 10:00:00, NaN  
30-Nov-2018 11:00:00, NaN  
30-Nov-2018 12:00:00, NaN  
30-Nov-2018 13:00:00, NaN  
30-Nov-2018 14:00:00, NaN  
30-Nov-2018 15:00:00, NaN  
30-Nov-2018 16:00:00, NaN  
30-Nov-2018 17:00:00, NaN  
30-Nov-2018 18:00:00, NaN  
30-Nov-2018 19:00:00, NaN  
30-Nov-2018 20:00:00, NaN  
30-Nov-2018 21:00:00, NaN  
30-Nov-2018 22:00:00, NaN  
30-Nov-2018 23:00:00, NaN  
01-Dec-2018, NaN  
01-Dec-2018 01:00:00, NaN  
01-Dec-2018 02:00:00, NaN  
01-Dec-2018 03:00:00, NaN  
01-Dec-2018 04:00:00, NaN  
01-Dec-2018 05:00:00, NaN  
01-Dec-2018 06:00:00, NaN  
01-Dec-2018 07:00:00, NaN  
01-Dec-2018 08:00:00, NaN  
01-Dec-2018 09:00:00, NaN  
01-Dec-2018 10:00:00, NaN  
01-Dec-2018 11:00:00, NaN  
01-Dec-2018 12:00:00, NaN  
01-Dec-2018 13:00:00, NaN  
01-Dec-2018 14:00:00, NaN  
01-Dec-2018 15:00:00, NaN  
01-Dec-2018 16:00:00, NaN  
01-Dec-2018 17:00:00, NaN  
01-Dec-2018 18:00:00, NaN  
01-Dec-2018 19:00:00, NaN  
01-Dec-2018 20:00:00, NaN  
01-Dec-2018 21:00:00, NaN  
01-Dec-2018 22:00:00, NaN  
01-Dec-2018 23:00:00, NaN  
02-Dec-2018, NaN  
02-Dec-2018 01:00:00, NaN  
02-Dec-2018 02:00:00, NaN  
02-Dec-2018 03:00:00, NaN  
02-Dec-2018 04:00:00, NaN  
02-Dec-2018 05:00:00, NaN  
02-Dec-2018 06:00:00, NaN  
02-Dec-2018 07:00:00, NaN  
02-Dec-2018 08:00:00, NaN  
02-Dec-2018 09:00:00, NaN  
02-Dec-2018 10:00:00, NaN  
02-Dec-2018 11:00:00, NaN  
02-Dec-2018 12:00:00, NaN  
02-Dec-2018 13:00:00, NaN  
02-Dec-2018 14:00:00, NaN

02-Dec-2018 15:00:00, NaN  
02-Dec-2018 16:00:00, NaN  
02-Dec-2018 17:00:00, NaN  
02-Dec-2018 18:00:00, NaN  
02-Dec-2018 19:00:00, NaN  
02-Dec-2018 20:00:00, NaN  
02-Dec-2018 21:00:00, NaN  
02-Dec-2018 22:00:00, NaN  
02-Dec-2018 23:00:00, NaN  
03-Dec-2018, NaN  
03-Dec-2018 01:00:00, NaN  
03-Dec-2018 02:00:00, NaN  
03-Dec-2018 03:00:00, NaN  
03-Dec-2018 04:00:00, NaN  
03-Dec-2018 05:00:00, NaN  
03-Dec-2018 06:00:00, NaN  
03-Dec-2018 07:00:00, NaN  
03-Dec-2018 08:00:00, NaN  
03-Dec-2018 09:00:00, NaN  
03-Dec-2018 10:00:00, NaN  
03-Dec-2018 11:00:00, NaN  
03-Dec-2018 12:00:00, NaN  
03-Dec-2018 13:00:00, NaN  
03-Dec-2018 14:00:00, NaN  
03-Dec-2018 15:00:00, NaN  
03-Dec-2018 16:00:00, NaN  
03-Dec-2018 17:00:00, NaN  
03-Dec-2018 18:00:00, NaN  
03-Dec-2018 19:00:00, NaN  
03-Dec-2018 20:00:00, NaN  
03-Dec-2018 21:00:00, NaN  
03-Dec-2018 22:00:00, NaN  
03-Dec-2018 23:00:00, NaN  
04-Dec-2018, NaN  
04-Dec-2018 01:00:00, NaN  
04-Dec-2018 02:00:00, NaN  
04-Dec-2018 03:00:00, NaN  
04-Dec-2018 04:00:00, NaN  
04-Dec-2018 05:00:00, NaN  
04-Dec-2018 06:00:00, NaN  
04-Dec-2018 07:00:00, NaN  
04-Dec-2018 08:00:00, NaN  
04-Dec-2018 09:00:00, NaN  
04-Dec-2018 10:00:00, NaN  
04-Dec-2018 11:00:00, NaN  
04-Dec-2018 12:00:00, NaN  
04-Dec-2018 13:00:00, NaN  
04-Dec-2018 14:00:00, NaN  
04-Dec-2018 15:00:00, NaN  
04-Dec-2018 16:00:00, NaN  
04-Dec-2018 17:00:00, NaN  
04-Dec-2018 18:00:00, NaN  
04-Dec-2018 19:00:00, NaN  
04-Dec-2018 20:00:00, NaN  
04-Dec-2018 21:00:00, NaN  
04-Dec-2018 22:00:00, NaN  
04-Dec-2018 23:00:00, NaN  
05-Dec-2018, NaN  
05-Dec-2018 01:00:00, NaN  
05-Dec-2018 02:00:00, NaN  
05-Dec-2018 03:00:00, NaN  
05-Dec-2018 04:00:00, NaN  
05-Dec-2018 05:00:00, NaN  
05-Dec-2018 06:00:00, NaN

05-Dec-2018 07:00:00, NaN  
05-Dec-2018 08:00:00, NaN  
05-Dec-2018 09:00:00, NaN  
05-Dec-2018 10:00:00, NaN  
05-Dec-2018 11:00:00, NaN  
05-Dec-2018 12:00:00, NaN  
05-Dec-2018 13:00:00, NaN  
05-Dec-2018 14:00:00, NaN  
05-Dec-2018 15:00:00, NaN  
05-Dec-2018 16:00:00, NaN  
05-Dec-2018 17:00:00, NaN  
05-Dec-2018 18:00:00, NaN  
05-Dec-2018 19:00:00, NaN  
05-Dec-2018 20:00:00, NaN  
05-Dec-2018 21:00:00, NaN  
05-Dec-2018 22:00:00, NaN  
05-Dec-2018 23:00:00, NaN  
06-Dec-2018, NaN  
06-Dec-2018 01:00:00, NaN  
06-Dec-2018 02:00:00, NaN  
06-Dec-2018 03:00:00, NaN  
06-Dec-2018 04:00:00, NaN  
06-Dec-2018 05:00:00, NaN  
06-Dec-2018 06:00:00, NaN  
06-Dec-2018 07:00:00, NaN  
06-Dec-2018 08:00:00, NaN  
06-Dec-2018 09:00:00, NaN  
06-Dec-2018 10:00:00, NaN  
06-Dec-2018 11:00:00, NaN  
06-Dec-2018 12:00:00, NaN  
06-Dec-2018 13:00:00, NaN  
06-Dec-2018 14:00:00, NaN  
06-Dec-2018 15:00:00, NaN  
06-Dec-2018 16:00:00, NaN  
06-Dec-2018 17:00:00, NaN  
06-Dec-2018 18:00:00, NaN  
06-Dec-2018 19:00:00, NaN  
06-Dec-2018 20:00:00, NaN  
06-Dec-2018 21:00:00, NaN  
06-Dec-2018 22:00:00, NaN  
06-Dec-2018 23:00:00, NaN  
07-Dec-2018, NaN  
07-Dec-2018 01:00:00, NaN  
07-Dec-2018 02:00:00, NaN  
07-Dec-2018 03:00:00, NaN  
07-Dec-2018 04:00:00, NaN  
07-Dec-2018 05:00:00, NaN  
07-Dec-2018 06:00:00, NaN  
07-Dec-2018 07:00:00, NaN  
07-Dec-2018 08:00:00, NaN  
07-Dec-2018 09:00:00, NaN  
07-Dec-2018 10:00:00, NaN  
07-Dec-2018 11:00:00, NaN  
07-Dec-2018 12:00:00, NaN  
07-Dec-2018 13:00:00, NaN  
07-Dec-2018 14:00:00, NaN  
07-Dec-2018 15:00:00, NaN  
07-Dec-2018 16:00:00, NaN  
07-Dec-2018 17:00:00, NaN  
07-Dec-2018 18:00:00, NaN  
07-Dec-2018 19:00:00, NaN  
07-Dec-2018 20:00:00, NaN  
07-Dec-2018 21:00:00, NaN  
07-Dec-2018 22:00:00, NaN

07-Dec-2018 23:00:00, NaN  
08-Dec-2018, NaN  
08-Dec-2018 01:00:00, NaN  
08-Dec-2018 02:00:00, NaN  
08-Dec-2018 03:00:00, NaN  
08-Dec-2018 04:00:00, NaN  
08-Dec-2018 05:00:00, NaN  
08-Dec-2018 06:00:00, NaN  
08-Dec-2018 07:00:00, NaN  
08-Dec-2018 08:00:00, NaN  
08-Dec-2018 09:00:00, NaN  
08-Dec-2018 10:00:00, NaN  
08-Dec-2018 11:00:00, NaN  
08-Dec-2018 12:00:00, NaN  
08-Dec-2018 13:00:00, NaN  
08-Dec-2018 14:00:00, NaN  
08-Dec-2018 15:00:00, NaN  
08-Dec-2018 16:00:00, NaN  
08-Dec-2018 17:00:00, NaN  
08-Dec-2018 18:00:00, NaN  
08-Dec-2018 19:00:00, NaN  
08-Dec-2018 20:00:00, NaN  
08-Dec-2018 21:00:00, NaN  
08-Dec-2018 22:00:00, NaN  
08-Dec-2018 23:00:00, NaN  
09-Dec-2018, NaN  
09-Dec-2018 01:00:00, NaN  
09-Dec-2018 02:00:00, NaN  
09-Dec-2018 03:00:00, NaN  
09-Dec-2018 04:00:00, NaN  
09-Dec-2018 05:00:00, NaN  
09-Dec-2018 06:00:00, NaN  
09-Dec-2018 07:00:00, NaN  
09-Dec-2018 08:00:00, NaN  
09-Dec-2018 09:00:00, NaN  
09-Dec-2018 10:00:00, NaN  
09-Dec-2018 11:00:00, NaN  
09-Dec-2018 12:00:00, NaN  
09-Dec-2018 13:00:00, NaN  
09-Dec-2018 14:00:00, NaN  
09-Dec-2018 15:00:00, NaN  
09-Dec-2018 16:00:00, NaN  
09-Dec-2018 17:00:00, NaN  
09-Dec-2018 18:00:00, NaN  
09-Dec-2018 19:00:00, NaN  
09-Dec-2018 20:00:00, NaN  
09-Dec-2018 21:00:00, NaN  
09-Dec-2018 22:00:00, NaN  
09-Dec-2018 23:00:00, NaN  
10-Dec-2018, NaN  
10-Dec-2018 01:00:00, NaN  
10-Dec-2018 02:00:00, NaN  
10-Dec-2018 03:00:00, NaN  
10-Dec-2018 04:00:00, NaN  
10-Dec-2018 05:00:00, NaN  
10-Dec-2018 06:00:00, NaN  
10-Dec-2018 14:00:00, NaN  
10-Dec-2018 15:00:00, NaN  
10-Dec-2018 16:00:00, NaN  
10-Dec-2018 17:00:00, NaN  
10-Dec-2018 18:00:00, NaN  
10-Dec-2018 19:00:00, NaN  
10-Dec-2018 20:00:00, NaN  
10-Dec-2018 21:00:00, NaN

10-Dec-2018 22:00:00, NaN  
10-Dec-2018 23:00:00, NaN  
11-Dec-2018, NaN  
11-Dec-2018 01:00:00, NaN  
11-Dec-2018 02:00:00, NaN  
11-Dec-2018 03:00:00, NaN  
11-Dec-2018 04:00:00, NaN  
11-Dec-2018 05:00:00, NaN  
11-Dec-2018 06:00:00, NaN  
11-Dec-2018 07:00:00, NaN  
11-Dec-2018 08:00:00, NaN  
11-Dec-2018 09:00:00, NaN  
11-Dec-2018 10:00:00, NaN  
11-Dec-2018 11:00:00, NaN  
11-Dec-2018 12:00:00, NaN  
11-Dec-2018 13:00:00, NaN  
11-Dec-2018 14:00:00, NaN  
11-Dec-2018 15:00:00, NaN  
11-Dec-2018 16:00:00, NaN  
11-Dec-2018 17:00:00, NaN  
11-Dec-2018 18:00:00, NaN  
11-Dec-2018 19:00:00, NaN  
11-Dec-2018 20:00:00, NaN  
11-Dec-2018 21:00:00, NaN  
11-Dec-2018 22:00:00, NaN  
11-Dec-2018 23:00:00, NaN  
12-Dec-2018, NaN  
12-Dec-2018 01:00:00, NaN  
12-Dec-2018 02:00:00, NaN  
12-Dec-2018 03:00:00, NaN  
12-Dec-2018 04:00:00, NaN  
12-Dec-2018 05:00:00, NaN  
12-Dec-2018 06:00:00, NaN  
12-Dec-2018 07:00:00, NaN  
12-Dec-2018 08:00:00, NaN  
12-Dec-2018 09:00:00, NaN  
12-Dec-2018 10:00:00, NaN  
12-Dec-2018 11:00:00, NaN  
12-Dec-2018 12:00:00, NaN  
12-Dec-2018 13:00:00, NaN  
12-Dec-2018 14:00:00, NaN  
12-Dec-2018 15:00:00, NaN  
12-Dec-2018 16:00:00, NaN  
12-Dec-2018 17:00:00, NaN  
12-Dec-2018 18:00:00, NaN  
12-Dec-2018 19:00:00, NaN  
12-Dec-2018 20:00:00, NaN  
12-Dec-2018 21:00:00, NaN  
12-Dec-2018 22:00:00, NaN  
12-Dec-2018 23:00:00, NaN  
13-Dec-2018, NaN  
13-Dec-2018 01:00:00, NaN  
13-Dec-2018 02:00:00, NaN  
13-Dec-2018 03:00:00, NaN  
13-Dec-2018 04:00:00, NaN  
13-Dec-2018 05:00:00, NaN  
13-Dec-2018 06:00:00, NaN  
13-Dec-2018 07:00:00, NaN  
13-Dec-2018 08:00:00, NaN  
13-Dec-2018 09:00:00, NaN  
13-Dec-2018 10:00:00, NaN  
13-Dec-2018 11:00:00, NaN  
13-Dec-2018 12:00:00, NaN  
13-Dec-2018 13:00:00, NaN

13-Dec-2018 14:00:00, NaN  
13-Dec-2018 15:00:00, NaN  
13-Dec-2018 16:00:00, NaN  
13-Dec-2018 17:00:00, NaN  
13-Dec-2018 18:00:00, NaN  
13-Dec-2018 19:00:00, NaN  
13-Dec-2018 20:00:00, NaN  
13-Dec-2018 21:00:00, NaN  
13-Dec-2018 22:00:00, NaN  
13-Dec-2018 23:00:00, NaN  
14-Dec-2018, NaN  
14-Dec-2018 01:00:00, NaN  
14-Dec-2018 02:00:00, NaN  
14-Dec-2018 03:00:00, NaN  
14-Dec-2018 04:00:00, NaN  
14-Dec-2018 05:00:00, NaN  
14-Dec-2018 06:00:00, NaN  
14-Dec-2018 07:00:00, NaN  
14-Dec-2018 08:00:00, NaN  
14-Dec-2018 09:00:00, NaN  
14-Dec-2018 10:00:00, NaN  
14-Dec-2018 11:00:00, NaN  
14-Dec-2018 12:00:00, NaN  
14-Dec-2018 13:00:00, NaN  
14-Dec-2018 14:00:00, NaN  
14-Dec-2018 15:00:00, NaN  
14-Dec-2018 16:00:00, NaN  
14-Dec-2018 17:00:00, NaN  
14-Dec-2018 18:00:00, NaN  
14-Dec-2018 19:00:00, NaN  
14-Dec-2018 20:00:00, NaN  
14-Dec-2018 21:00:00, NaN  
14-Dec-2018 22:00:00, NaN  
14-Dec-2018 23:00:00, NaN  
15-Dec-2018, NaN  
15-Dec-2018 01:00:00, NaN  
15-Dec-2018 02:00:00, NaN  
15-Dec-2018 03:00:00, NaN  
15-Dec-2018 04:00:00, NaN  
15-Dec-2018 05:00:00, NaN  
15-Dec-2018 06:00:00, NaN  
15-Dec-2018 07:00:00, NaN  
15-Dec-2018 08:00:00, NaN  
15-Dec-2018 09:00:00, NaN  
15-Dec-2018 10:00:00, NaN  
15-Dec-2018 11:00:00, NaN  
15-Dec-2018 12:00:00, NaN  
15-Dec-2018 13:00:00, NaN  
15-Dec-2018 14:00:00, NaN  
15-Dec-2018 15:00:00, NaN  
15-Dec-2018 16:00:00, NaN  
15-Dec-2018 17:00:00, NaN  
15-Dec-2018 18:00:00, NaN  
15-Dec-2018 19:00:00, NaN  
15-Dec-2018 20:00:00, NaN  
15-Dec-2018 21:00:00, NaN  
15-Dec-2018 22:00:00, NaN  
15-Dec-2018 23:00:00, NaN  
16-Dec-2018, NaN  
16-Dec-2018 01:00:00, NaN  
16-Dec-2018 02:00:00, NaN  
16-Dec-2018 03:00:00, NaN  
16-Dec-2018 04:00:00, NaN  
16-Dec-2018 05:00:00, NaN

16-Dec-2018 06:00:00, NaN  
16-Dec-2018 07:00:00, NaN  
16-Dec-2018 08:00:00, NaN  
16-Dec-2018 09:00:00, NaN  
16-Dec-2018 10:00:00, NaN  
16-Dec-2018 11:00:00, NaN  
16-Dec-2018 12:00:00, NaN  
16-Dec-2018 13:00:00, NaN  
16-Dec-2018 14:00:00, NaN  
16-Dec-2018 15:00:00, NaN  
16-Dec-2018 16:00:00, NaN  
16-Dec-2018 17:00:00, NaN  
16-Dec-2018 18:00:00, NaN  
16-Dec-2018 19:00:00, NaN  
16-Dec-2018 20:00:00, NaN  
16-Dec-2018 21:00:00, NaN  
16-Dec-2018 22:00:00, NaN  
16-Dec-2018 23:00:00, NaN  
17-Dec-2018, NaN  
17-Dec-2018 01:00:00, NaN  
17-Dec-2018 02:00:00, NaN  
17-Dec-2018 03:00:00, NaN  
17-Dec-2018 04:00:00, NaN  
17-Dec-2018 05:00:00, NaN  
17-Dec-2018 06:00:00, NaN  
17-Dec-2018 07:00:00, NaN  
17-Dec-2018 08:00:00, NaN  
17-Dec-2018 09:00:00, NaN  
17-Dec-2018 10:00:00, NaN  
17-Dec-2018 11:00:00, NaN  
17-Dec-2018 12:00:00, NaN  
17-Dec-2018 13:00:00, NaN  
17-Dec-2018 14:00:00, NaN  
17-Dec-2018 15:00:00, NaN  
17-Dec-2018 16:00:00, NaN  
17-Dec-2018 17:00:00, NaN  
17-Dec-2018 18:00:00, NaN  
17-Dec-2018 19:00:00, NaN  
17-Dec-2018 20:00:00, NaN  
17-Dec-2018 21:00:00, NaN  
17-Dec-2018 22:00:00, NaN  
17-Dec-2018 23:00:00, NaN  
18-Dec-2018, NaN  
18-Dec-2018 01:00:00, NaN  
18-Dec-2018 02:00:00, NaN  
18-Dec-2018 03:00:00, NaN  
18-Dec-2018 04:00:00, NaN  
18-Dec-2018 05:00:00, NaN  
18-Dec-2018 06:00:00, NaN  
18-Dec-2018 07:00:00, NaN  
18-Dec-2018 08:00:00, NaN  
18-Dec-2018 09:00:00, NaN  
18-Dec-2018 10:00:00, NaN  
18-Dec-2018 11:00:00, NaN  
18-Dec-2018 12:00:00, NaN  
18-Dec-2018 13:00:00, NaN  
18-Dec-2018 14:00:00, NaN  
18-Dec-2018 15:00:00, NaN  
18-Dec-2018 16:00:00, NaN  
18-Dec-2018 17:00:00, NaN  
18-Dec-2018 18:00:00, NaN  
18-Dec-2018 19:00:00, NaN  
18-Dec-2018 20:00:00, NaN  
18-Dec-2018 21:00:00, NaN

18-Dec-2018 22:00:00, NaN  
18-Dec-2018 23:00:00, NaN  
19-Dec-2018, NaN  
19-Dec-2018 01:00:00, NaN  
19-Dec-2018 02:00:00, NaN  
19-Dec-2018 03:00:00, NaN  
19-Dec-2018 04:00:00, NaN  
19-Dec-2018 05:00:00, NaN  
19-Dec-2018 06:00:00, NaN  
19-Dec-2018 07:00:00, NaN  
19-Dec-2018 08:00:00, NaN  
19-Dec-2018 09:00:00, NaN  
19-Dec-2018 10:00:00, NaN  
19-Dec-2018 11:00:00, NaN  
19-Dec-2018 12:00:00, NaN  
19-Dec-2018 13:00:00, NaN  
19-Dec-2018 14:00:00, NaN  
19-Dec-2018 15:00:00, NaN  
19-Dec-2018 16:00:00, NaN  
19-Dec-2018 17:00:00, NaN  
19-Dec-2018 18:00:00, NaN  
19-Dec-2018 19:00:00, NaN  
19-Dec-2018 20:00:00, NaN  
19-Dec-2018 21:00:00, NaN  
19-Dec-2018 22:00:00, NaN  
19-Dec-2018 23:00:00, NaN  
20-Dec-2018, NaN  
20-Dec-2018 01:00:00, NaN  
20-Dec-2018 02:00:00, NaN  
20-Dec-2018 03:00:00, NaN  
20-Dec-2018 04:00:00, NaN  
20-Dec-2018 05:00:00, NaN  
20-Dec-2018 06:00:00, NaN  
20-Dec-2018 07:00:00, NaN  
20-Dec-2018 08:00:00, NaN  
20-Dec-2018 09:00:00, NaN  
20-Dec-2018 10:00:00, NaN  
20-Dec-2018 11:00:00, NaN  
20-Dec-2018 12:00:00, NaN  
20-Dec-2018 13:00:00, NaN  
20-Dec-2018 14:00:00, NaN  
20-Dec-2018 15:00:00, NaN  
20-Dec-2018 16:00:00, NaN  
20-Dec-2018 17:00:00, NaN  
20-Dec-2018 18:00:00, NaN  
20-Dec-2018 19:00:00, NaN  
20-Dec-2018 20:00:00, NaN  
20-Dec-2018 21:00:00, NaN  
20-Dec-2018 22:00:00, NaN  
20-Dec-2018 23:00:00, NaN  
21-Dec-2018, NaN  
21-Dec-2018 01:00:00, NaN  
21-Dec-2018 02:00:00, NaN  
21-Dec-2018 03:00:00, NaN  
21-Dec-2018 04:00:00, NaN  
21-Dec-2018 05:00:00, NaN  
21-Dec-2018 06:00:00, NaN  
21-Dec-2018 07:00:00, NaN  
21-Dec-2018 08:00:00, NaN  
21-Dec-2018 09:00:00, NaN  
21-Dec-2018 10:00:00, NaN  
21-Dec-2018 11:00:00, NaN  
21-Dec-2018 12:00:00, NaN  
21-Dec-2018 13:00:00, NaN



21-Dec-2018 14:00:00, NaN  
21-Dec-2018 15:00:00, NaN  
21-Dec-2018 16:00:00, NaN  
21-Dec-2018 17:00:00, NaN  
21-Dec-2018 18:00:00, NaN  
21-Dec-2018 19:00:00, NaN  
21-Dec-2018 20:00:00, NaN  
21-Dec-2018 21:00:00, NaN  
21-Dec-2018 22:00:00, NaN  
21-Dec-2018 23:00:00, NaN  
22-Dec-2018, NaN  
22-Dec-2018 01:00:00, NaN  
22-Dec-2018 02:00:00, NaN  
22-Dec-2018 03:00:00, NaN  
22-Dec-2018 04:00:00, NaN  
22-Dec-2018 05:00:00, NaN  
22-Dec-2018 06:00:00, NaN  
22-Dec-2018 07:00:00, NaN  
22-Dec-2018 08:00:00, NaN  
22-Dec-2018 09:00:00, NaN  
22-Dec-2018 10:00:00, NaN  
22-Dec-2018 11:00:00, NaN  
22-Dec-2018 12:00:00, NaN  
22-Dec-2018 13:00:00, NaN  
22-Dec-2018 14:00:00, NaN  
22-Dec-2018 15:00:00, NaN  
22-Dec-2018 16:00:00, NaN  
22-Dec-2018 17:00:00, NaN  
22-Dec-2018 18:00:00, NaN  
22-Dec-2018 19:00:00, NaN  
22-Dec-2018 20:00:00, NaN  
22-Dec-2018 21:00:00, NaN  
22-Dec-2018 22:00:00, NaN  
22-Dec-2018 23:00:00, NaN  
23-Dec-2018, NaN  
23-Dec-2018 01:00:00, NaN  
23-Dec-2018 02:00:00, NaN  
23-Dec-2018 03:00:00, NaN  
23-Dec-2018 04:00:00, NaN  
23-Dec-2018 05:00:00, NaN  
23-Dec-2018 06:00:00, NaN  
23-Dec-2018 07:00:00, NaN  
23-Dec-2018 08:00:00, NaN  
23-Dec-2018 09:00:00, NaN  
23-Dec-2018 10:00:00, NaN  
23-Dec-2018 11:00:00, NaN  
23-Dec-2018 12:00:00, NaN  
23-Dec-2018 13:00:00, NaN  
23-Dec-2018 14:00:00, NaN  
23-Dec-2018 15:00:00, NaN  
23-Dec-2018 16:00:00, NaN  
23-Dec-2018 17:00:00, NaN  
23-Dec-2018 18:00:00, NaN  
23-Dec-2018 19:00:00, NaN  
23-Dec-2018 20:00:00, NaN  
23-Dec-2018 21:00:00, NaN  
23-Dec-2018 22:00:00, NaN  
23-Dec-2018 23:00:00, NaN  
24-Dec-2018, NaN  
24-Dec-2018 01:00:00, NaN  
24-Dec-2018 02:00:00, NaN  
24-Dec-2018 03:00:00, NaN  
24-Dec-2018 04:00:00, NaN  
24-Dec-2018 05:00:00, NaN

24-Dec-2018 06:00:00, NaN  
24-Dec-2018 07:00:00, NaN  
24-Dec-2018 08:00:00, NaN  
24-Dec-2018 09:00:00, NaN  
24-Dec-2018 10:00:00, NaN  
24-Dec-2018 11:00:00, NaN  
24-Dec-2018 12:00:00, NaN  
24-Dec-2018 13:00:00, NaN  
24-Dec-2018 14:00:00, NaN  
24-Dec-2018 15:00:00, NaN  
24-Dec-2018 16:00:00, NaN  
24-Dec-2018 17:00:00, NaN  
24-Dec-2018 18:00:00, NaN  
24-Dec-2018 19:00:00, NaN  
24-Dec-2018 20:00:00, NaN  
24-Dec-2018 21:00:00, NaN  
24-Dec-2018 22:00:00, NaN  
24-Dec-2018 23:00:00, NaN  
25-Dec-2018, NaN  
25-Dec-2018 01:00:00, NaN  
25-Dec-2018 02:00:00, NaN  
25-Dec-2018 03:00:00, NaN  
25-Dec-2018 04:00:00, NaN  
25-Dec-2018 05:00:00, NaN  
25-Dec-2018 06:00:00, NaN  
25-Dec-2018 07:00:00, NaN  
25-Dec-2018 08:00:00, NaN  
25-Dec-2018 09:00:00, NaN  
25-Dec-2018 10:00:00, NaN  
25-Dec-2018 11:00:00, NaN  
25-Dec-2018 12:00:00, NaN  
25-Dec-2018 13:00:00, NaN  
25-Dec-2018 14:00:00, NaN  
25-Dec-2018 15:00:00, NaN  
25-Dec-2018 16:00:00, NaN  
25-Dec-2018 17:00:00, NaN  
25-Dec-2018 18:00:00, NaN  
25-Dec-2018 19:00:00, NaN  
25-Dec-2018 20:00:00, NaN  
25-Dec-2018 21:00:00, NaN  
25-Dec-2018 22:00:00, NaN  
25-Dec-2018 23:00:00, NaN  
26-Dec-2018, NaN  
26-Dec-2018 01:00:00, NaN  
26-Dec-2018 02:00:00, NaN  
26-Dec-2018 03:00:00, NaN  
26-Dec-2018 04:00:00, NaN  
26-Dec-2018 05:00:00, NaN  
26-Dec-2018 06:00:00, NaN  
26-Dec-2018 07:00:00, NaN  
26-Dec-2018 08:00:00, NaN  
26-Dec-2018 09:00:00, NaN  
26-Dec-2018 10:00:00, NaN  
26-Dec-2018 11:00:00, NaN  
26-Dec-2018 12:00:00, NaN  
26-Dec-2018 13:00:00, NaN  
26-Dec-2018 14:00:00, NaN  
26-Dec-2018 15:00:00, NaN  
26-Dec-2018 16:00:00, NaN  
26-Dec-2018 17:00:00, NaN  
26-Dec-2018 18:00:00, NaN  
26-Dec-2018 19:00:00, NaN  
26-Dec-2018 20:00:00, NaN  
26-Dec-2018 21:00:00, NaN

26-Dec-2018 22:00:00, NaN  
26-Dec-2018 23:00:00, NaN  
27-Dec-2018, NaN  
27-Dec-2018 01:00:00, NaN  
27-Dec-2018 02:00:00, NaN  
27-Dec-2018 03:00:00, NaN  
27-Dec-2018 04:00:00, NaN  
27-Dec-2018 05:00:00, NaN  
27-Dec-2018 06:00:00, NaN  
27-Dec-2018 07:00:00, NaN  
27-Dec-2018 08:00:00, NaN  
27-Dec-2018 09:00:00, NaN  
27-Dec-2018 10:00:00, NaN  
27-Dec-2018 11:00:00, NaN  
27-Dec-2018 12:00:00, NaN  
27-Dec-2018 13:00:00, NaN  
27-Dec-2018 14:00:00, NaN  
27-Dec-2018 15:00:00, NaN  
27-Dec-2018 16:00:00, NaN  
27-Dec-2018 17:00:00, NaN  
27-Dec-2018 18:00:00, NaN  
27-Dec-2018 19:00:00, NaN  
27-Dec-2018 20:00:00, NaN  
27-Dec-2018 21:00:00, NaN  
27-Dec-2018 22:00:00, NaN  
27-Dec-2018 23:00:00, NaN  
28-Dec-2018, NaN  
28-Dec-2018 01:00:00, NaN  
28-Dec-2018 02:00:00, NaN  
28-Dec-2018 03:00:00, NaN  
28-Dec-2018 04:00:00, NaN  
28-Dec-2018 05:00:00, NaN  
28-Dec-2018 06:00:00, NaN  
28-Dec-2018 07:00:00, NaN  
28-Dec-2018 08:00:00, NaN  
28-Dec-2018 09:00:00, NaN  
28-Dec-2018 10:00:00, NaN  
28-Dec-2018 11:00:00, NaN  
28-Dec-2018 12:00:00, NaN  
28-Dec-2018 13:00:00, NaN  
28-Dec-2018 14:00:00, NaN  
28-Dec-2018 15:00:00, NaN  
28-Dec-2018 16:00:00, NaN  
28-Dec-2018 17:00:00, NaN  
28-Dec-2018 18:00:00, NaN  
28-Dec-2018 19:00:00, NaN  
28-Dec-2018 20:00:00, NaN  
28-Dec-2018 21:00:00, NaN  
28-Dec-2018 22:00:00, NaN  
28-Dec-2018 23:00:00, NaN  
29-Dec-2018, NaN  
29-Dec-2018 01:00:00, NaN  
29-Dec-2018 02:00:00, NaN  
29-Dec-2018 03:00:00, NaN  
29-Dec-2018 04:00:00, NaN  
29-Dec-2018 05:00:00, NaN  
29-Dec-2018 06:00:00, NaN  
29-Dec-2018 07:00:00, NaN  
29-Dec-2018 08:00:00, NaN  
29-Dec-2018 09:00:00, NaN  
29-Dec-2018 10:00:00, NaN  
29-Dec-2018 11:00:00, NaN  
29-Dec-2018 12:00:00, NaN  
29-Dec-2018 13:00:00, NaN

29-Dec-2018 14:00:00, NaN  
29-Dec-2018 15:00:00, NaN  
29-Dec-2018 16:00:00, NaN  
29-Dec-2018 17:00:00, NaN  
29-Dec-2018 18:00:00, NaN  
29-Dec-2018 19:00:00, NaN  
29-Dec-2018 20:00:00, NaN  
29-Dec-2018 21:00:00, NaN  
29-Dec-2018 22:00:00, NaN  
29-Dec-2018 23:00:00, NaN  
30-Dec-2018, NaN  
30-Dec-2018 01:00:00, NaN  
30-Dec-2018 02:00:00, NaN  
30-Dec-2018 03:00:00, NaN  
30-Dec-2018 04:00:00, NaN  
30-Dec-2018 05:00:00, NaN  
30-Dec-2018 06:00:00, NaN  
30-Dec-2018 07:00:00, NaN  
30-Dec-2018 08:00:00, NaN  
30-Dec-2018 09:00:00, NaN  
30-Dec-2018 10:00:00, NaN  
30-Dec-2018 11:00:00, NaN  
30-Dec-2018 12:00:00, NaN  
30-Dec-2018 13:00:00, NaN  
30-Dec-2018 14:00:00, NaN  
30-Dec-2018 15:00:00, NaN  
30-Dec-2018 16:00:00, NaN  
30-Dec-2018 17:00:00, NaN  
30-Dec-2018 18:00:00, NaN  
30-Dec-2018 19:00:00, NaN  
30-Dec-2018 20:00:00, NaN  
30-Dec-2018 21:00:00, NaN  
30-Dec-2018 22:00:00, NaN  
30-Dec-2018 23:00:00, NaN  
31-Dec-2018, NaN  
31-Dec-2018 01:00:00, NaN  
31-Dec-2018 02:00:00, NaN  
31-Dec-2018 03:00:00, NaN  
31-Dec-2018 04:00:00, NaN  
31-Dec-2018 05:00:00, NaN  
31-Dec-2018 06:00:00, NaN  
31-Dec-2018 07:00:00, NaN  
31-Dec-2018 08:00:00, NaN  
31-Dec-2018 09:00:00, NaN  
31-Dec-2018 10:00:00, NaN  
31-Dec-2018 11:00:00, NaN  
31-Dec-2018 12:00:00, NaN  
31-Dec-2018 13:00:00, NaN  
31-Dec-2018 14:00:00, NaN  
31-Dec-2018 15:00:00, NaN  
31-Dec-2018 16:00:00, NaN  
31-Dec-2018 17:00:00, NaN  
31-Dec-2018 18:00:00, NaN  
31-Dec-2018 19:00:00, NaN  
31-Dec-2018 20:00:00, NaN  
31-Dec-2018 21:00:00, NaN  
31-Dec-2018 22:00:00, NaN  
31-Dec-2018 23:00:00, NaN  
01-Jan-2019, NaN  
01-Jan-2019 01:00:00, NaN  
01-Jan-2019 02:00:00, NaN  
01-Jan-2019 03:00:00, NaN  
01-Jan-2019 04:00:00, NaN  
01-Jan-2019 05:00:00, NaN

|              |           |     |
|--------------|-----------|-----|
| 01-Jan-2019  | 06:00:00, | NaN |
| 01-Jan-2019  | 07:00:00, | NaN |
| 01-Jan-2019  | 08:00:00, | NaN |
| 01-Jan-2019  | 09:00:00, | NaN |
| 01-Jan-2019  | 10:00:00, | NaN |
| 01-Jan-2019  | 11:00:00, | NaN |
| 01-Jan-2019  | 12:00:00, | NaN |
| 01-Jan-2019  | 13:00:00, | NaN |
| 01-Jan-2019  | 14:00:00, | NaN |
| 01-Jan-2019  | 15:00:00, | NaN |
| 01-Jan-2019  | 16:00:00, | NaN |
| 01-Jan-2019  | 17:00:00, | NaN |
| 01-Jan-2019  | 18:00:00, | NaN |
| 01-Jan-2019  | 19:00:00, | NaN |
| 01-Jan-2019  | 20:00:00, | NaN |
| 01-Jan-2019  | 21:00:00, | NaN |
| 01-Jan-2019  | 22:00:00, | NaN |
| 01-Jan-2019  | 23:00:00, | NaN |
| 02-Jan-2019, |           | NaN |
| 02-Jan-2019  | 01:00:00, | NaN |
| 02-Jan-2019  | 02:00:00, | NaN |
| 02-Jan-2019  | 03:00:00, | NaN |
| 02-Jan-2019  | 04:00:00, | NaN |
| 02-Jan-2019  | 05:00:00, | NaN |
| 02-Jan-2019  | 06:00:00, | NaN |
| 02-Jan-2019  | 07:00:00, | NaN |
| 02-Jan-2019  | 08:00:00, | NaN |
| 02-Jan-2019  | 09:00:00, | NaN |
| 02-Jan-2019  | 10:00:00, | NaN |
| 02-Jan-2019  | 11:00:00, | NaN |
| 02-Jan-2019  | 12:00:00, | NaN |
| 02-Jan-2019  | 13:00:00, | NaN |
| 02-Jan-2019  | 14:00:00, | NaN |
| 02-Jan-2019  | 15:00:00, | NaN |
| 02-Jan-2019  | 16:00:00, | NaN |
| 02-Jan-2019  | 17:00:00, | NaN |
| 02-Jan-2019  | 18:00:00, | NaN |
| 02-Jan-2019  | 19:00:00, | NaN |
| 02-Jan-2019  | 20:00:00, | NaN |
| 02-Jan-2019  | 21:00:00, | NaN |
| 02-Jan-2019  | 22:00:00, | NaN |
| 02-Jan-2019  | 23:00:00, | NaN |
| 03-Jan-2019, |           | NaN |
| 03-Jan-2019  | 01:00:00, | NaN |
| 03-Jan-2019  | 02:00:00, | NaN |
| 03-Jan-2019  | 03:00:00, | NaN |
| 03-Jan-2019  | 04:00:00, | NaN |
| 03-Jan-2019  | 05:00:00, | NaN |
| 03-Jan-2019  | 06:00:00, | NaN |
| 03-Jan-2019  | 07:00:00, | NaN |
| 03-Jan-2019  | 08:00:00, | NaN |
| 03-Jan-2019  | 09:00:00, | NaN |
| 03-Jan-2019  | 10:00:00, | NaN |
| 03-Jan-2019  | 11:00:00, | NaN |
| 03-Jan-2019  | 12:00:00, | NaN |
| 03-Jan-2019  | 13:00:00, | NaN |
| 03-Jan-2019  | 14:00:00, | NaN |
| 03-Jan-2019  | 15:00:00, | NaN |
| 03-Jan-2019  | 16:00:00, | NaN |
| 03-Jan-2019  | 17:00:00, | NaN |
| 03-Jan-2019  | 18:00:00, | NaN |
| 03-Jan-2019  | 19:00:00, | NaN |
| 03-Jan-2019  | 20:00:00, | NaN |
| 03-Jan-2019  | 21:00:00, | NaN |

03-Jan-2019 22:00:00, NaN  
03-Jan-2019 23:00:00, NaN  
04-Jan-2019, NaN  
04-Jan-2019 01:00:00, NaN  
04-Jan-2019 02:00:00, NaN  
04-Jan-2019 03:00:00, NaN  
04-Jan-2019 04:00:00, NaN  
04-Jan-2019 05:00:00, NaN  
04-Jan-2019 06:00:00, NaN  
04-Jan-2019 07:00:00, NaN  
04-Jan-2019 08:00:00, NaN  
04-Jan-2019 09:00:00, NaN  
04-Jan-2019 10:00:00, NaN  
04-Jan-2019 11:00:00, NaN  
04-Jan-2019 12:00:00, NaN  
04-Jan-2019 13:00:00, NaN  
04-Jan-2019 14:00:00, NaN  
04-Jan-2019 15:00:00, NaN  
04-Jan-2019 16:00:00, NaN  
04-Jan-2019 17:00:00, NaN  
04-Jan-2019 18:00:00, NaN  
04-Jan-2019 19:00:00, NaN  
04-Jan-2019 20:00:00, NaN  
04-Jan-2019 21:00:00, NaN  
04-Jan-2019 22:00:00, NaN  
04-Jan-2019 23:00:00, NaN  
05-Jan-2019, NaN  
05-Jan-2019 01:00:00, NaN  
05-Jan-2019 02:00:00, NaN  
05-Jan-2019 03:00:00, NaN  
05-Jan-2019 04:00:00, NaN  
05-Jan-2019 05:00:00, NaN  
05-Jan-2019 06:00:00, NaN  
05-Jan-2019 07:00:00, NaN  
05-Jan-2019 08:00:00, NaN  
05-Jan-2019 09:00:00, NaN  
05-Jan-2019 10:00:00, NaN  
05-Jan-2019 11:00:00, NaN  
05-Jan-2019 12:00:00, NaN  
05-Jan-2019 13:00:00, NaN  
05-Jan-2019 14:00:00, NaN  
05-Jan-2019 15:00:00, NaN  
05-Jan-2019 16:00:00, NaN  
05-Jan-2019 17:00:00, NaN  
05-Jan-2019 18:00:00, NaN  
05-Jan-2019 19:00:00, NaN  
05-Jan-2019 20:00:00, NaN  
05-Jan-2019 21:00:00, NaN  
05-Jan-2019 22:00:00, NaN  
05-Jan-2019 23:00:00, NaN  
06-Jan-2019, NaN  
06-Jan-2019 01:00:00, NaN  
06-Jan-2019 02:00:00, NaN  
06-Jan-2019 03:00:00, NaN  
06-Jan-2019 04:00:00, NaN  
06-Jan-2019 05:00:00, NaN  
06-Jan-2019 06:00:00, NaN  
06-Jan-2019 07:00:00, NaN  
06-Jan-2019 08:00:00, NaN  
06-Jan-2019 09:00:00, NaN  
06-Jan-2019 10:00:00, NaN  
06-Jan-2019 11:00:00, NaN  
06-Jan-2019 12:00:00, NaN  
06-Jan-2019 13:00:00, NaN

06-Jan-2019 14:00:00, NaN  
06-Jan-2019 15:00:00, NaN  
06-Jan-2019 16:00:00, NaN  
06-Jan-2019 17:00:00, NaN  
06-Jan-2019 18:00:00, NaN  
06-Jan-2019 19:00:00, NaN  
06-Jan-2019 20:00:00, NaN  
06-Jan-2019 21:00:00, NaN  
06-Jan-2019 22:00:00, NaN  
06-Jan-2019 23:00:00, NaN  
07-Jan-2019, NaN  
07-Jan-2019 01:00:00, NaN  
07-Jan-2019 02:00:00, NaN  
07-Jan-2019 03:00:00, NaN  
07-Jan-2019 04:00:00, NaN  
07-Jan-2019 05:00:00, NaN  
07-Jan-2019 06:00:00, NaN  
07-Jan-2019 07:00:00, NaN  
07-Jan-2019 08:00:00, NaN  
07-Jan-2019 09:00:00, NaN  
07-Jan-2019 10:00:00, NaN  
07-Jan-2019 11:00:00, NaN  
07-Jan-2019 12:00:00, NaN  
07-Jan-2019 13:00:00, NaN  
07-Jan-2019 14:00:00, NaN  
07-Jan-2019 15:00:00, NaN  
07-Jan-2019 16:00:00, NaN  
07-Jan-2019 17:00:00, NaN  
07-Jan-2019 18:00:00, NaN  
07-Jan-2019 19:00:00, NaN  
07-Jan-2019 20:00:00, NaN  
07-Jan-2019 21:00:00, NaN  
07-Jan-2019 22:00:00, NaN  
07-Jan-2019 23:00:00, NaN  
08-Jan-2019, NaN  
08-Jan-2019 01:00:00, NaN  
08-Jan-2019 02:00:00, NaN  
08-Jan-2019 03:00:00, NaN  
08-Jan-2019 04:00:00, NaN  
08-Jan-2019 05:00:00, NaN  
08-Jan-2019 06:00:00, NaN  
08-Jan-2019 07:00:00, NaN  
08-Jan-2019 08:00:00, NaN  
08-Jan-2019 09:00:00, NaN  
08-Jan-2019 10:00:00, NaN  
08-Jan-2019 11:00:00, NaN  
08-Jan-2019 12:00:00, NaN  
08-Jan-2019 13:00:00, NaN  
08-Jan-2019 14:00:00, NaN  
08-Jan-2019 15:00:00, NaN  
08-Jan-2019 16:00:00, NaN  
08-Jan-2019 17:00:00, NaN  
08-Jan-2019 18:00:00, NaN  
08-Jan-2019 19:00:00, NaN  
08-Jan-2019 20:00:00, NaN  
08-Jan-2019 21:00:00, NaN  
08-Jan-2019 22:00:00, NaN  
08-Jan-2019 23:00:00, NaN  
09-Jan-2019, NaN  
09-Jan-2019 01:00:00, NaN  
09-Jan-2019 02:00:00, NaN  
09-Jan-2019 03:00:00, NaN  
09-Jan-2019 04:00:00, NaN  
09-Jan-2019 05:00:00, NaN

|              |           |     |
|--------------|-----------|-----|
| 09-Jan-2019  | 06:00:00, | NaN |
| 09-Jan-2019  | 07:00:00, | NaN |
| 09-Jan-2019  | 08:00:00, | NaN |
| 09-Jan-2019  | 09:00:00, | NaN |
| 09-Jan-2019  | 10:00:00, | NaN |
| 09-Jan-2019  | 11:00:00, | NaN |
| 09-Jan-2019  | 12:00:00, | NaN |
| 09-Jan-2019  | 13:00:00, | NaN |
| 09-Jan-2019  | 14:00:00, | NaN |
| 09-Jan-2019  | 15:00:00, | NaN |
| 09-Jan-2019  | 16:00:00, | NaN |
| 09-Jan-2019  | 17:00:00, | NaN |
| 09-Jan-2019  | 18:00:00, | NaN |
| 09-Jan-2019  | 19:00:00, | NaN |
| 09-Jan-2019  | 20:00:00, | NaN |
| 09-Jan-2019  | 21:00:00, | NaN |
| 09-Jan-2019  | 22:00:00, | NaN |
| 09-Jan-2019  | 23:00:00, | NaN |
| 10-Jan-2019, |           | NaN |
| 10-Jan-2019  | 01:00:00, | NaN |
| 10-Jan-2019  | 02:00:00, | NaN |
| 10-Jan-2019  | 03:00:00, | NaN |
| 10-Jan-2019  | 04:00:00, | NaN |
| 10-Jan-2019  | 05:00:00, | NaN |
| 10-Jan-2019  | 06:00:00, | NaN |
| 10-Jan-2019  | 07:00:00, | NaN |
| 10-Jan-2019  | 08:00:00, | NaN |
| 10-Jan-2019  | 09:00:00, | NaN |
| 10-Jan-2019  | 10:00:00, | NaN |
| 10-Jan-2019  | 11:00:00, | NaN |
| 10-Jan-2019  | 12:00:00, | NaN |
| 10-Jan-2019  | 13:00:00, | NaN |
| 10-Jan-2019  | 14:00:00, | NaN |
| 10-Jan-2019  | 15:00:00, | NaN |
| 10-Jan-2019  | 16:00:00, | NaN |
| 10-Jan-2019  | 17:00:00, | NaN |
| 10-Jan-2019  | 18:00:00, | NaN |
| 10-Jan-2019  | 19:00:00, | NaN |
| 10-Jan-2019  | 20:00:00, | NaN |
| 10-Jan-2019  | 21:00:00, | NaN |
| 10-Jan-2019  | 22:00:00, | NaN |
| 10-Jan-2019  | 23:00:00, | NaN |
| 11-Jan-2019, |           | NaN |
| 11-Jan-2019  | 01:00:00, | NaN |
| 11-Jan-2019  | 02:00:00, | NaN |
| 11-Jan-2019  | 03:00:00, | NaN |
| 11-Jan-2019  | 04:00:00, | NaN |
| 11-Jan-2019  | 05:00:00, | NaN |
| 11-Jan-2019  | 06:00:00, | NaN |
| 11-Jan-2019  | 07:00:00, | NaN |
| 11-Jan-2019  | 08:00:00, | NaN |
| 11-Jan-2019  | 09:00:00, | NaN |
| 11-Jan-2019  | 10:00:00, | NaN |
| 11-Jan-2019  | 11:00:00, | NaN |
| 11-Jan-2019  | 12:00:00, | NaN |
| 11-Jan-2019  | 13:00:00, | NaN |
| 11-Jan-2019  | 14:00:00, | NaN |
| 11-Jan-2019  | 15:00:00, | NaN |
| 11-Jan-2019  | 16:00:00, | NaN |
| 11-Jan-2019  | 17:00:00, | NaN |
| 11-Jan-2019  | 18:00:00, | NaN |
| 11-Jan-2019  | 19:00:00, | NaN |
| 11-Jan-2019  | 20:00:00, | NaN |
| 11-Jan-2019  | 21:00:00, | NaN |



11-Jan-2019 22:00:00, NaN  
11-Jan-2019 23:00:00, NaN  
12-Jan-2019, NaN  
12-Jan-2019 01:00:00, NaN  
12-Jan-2019 02:00:00, NaN  
12-Jan-2019 03:00:00, NaN  
12-Jan-2019 04:00:00, NaN  
12-Jan-2019 05:00:00, NaN  
12-Jan-2019 06:00:00, NaN  
12-Jan-2019 07:00:00, NaN  
12-Jan-2019 08:00:00, NaN  
12-Jan-2019 09:00:00, NaN  
12-Jan-2019 10:00:00, NaN  
12-Jan-2019 11:00:00, NaN  
12-Jan-2019 12:00:00, NaN  
12-Jan-2019 13:00:00, NaN  
12-Jan-2019 14:00:00, NaN  
12-Jan-2019 15:00:00, NaN  
12-Jan-2019 16:00:00, NaN  
12-Jan-2019 17:00:00, NaN  
12-Jan-2019 18:00:00, NaN  
12-Jan-2019 19:00:00, NaN  
12-Jan-2019 20:00:00, NaN  
12-Jan-2019 21:00:00, NaN  
12-Jan-2019 22:00:00, NaN  
12-Jan-2019 23:00:00, NaN  
13-Jan-2019, NaN  
13-Jan-2019 01:00:00, NaN  
13-Jan-2019 02:00:00, NaN  
13-Jan-2019 03:00:00, NaN  
13-Jan-2019 04:00:00, NaN  
13-Jan-2019 05:00:00, NaN  
13-Jan-2019 06:00:00, NaN  
13-Jan-2019 07:00:00, NaN  
13-Jan-2019 08:00:00, NaN  
13-Jan-2019 09:00:00, NaN  
13-Jan-2019 10:00:00, NaN  
13-Jan-2019 11:00:00, NaN  
13-Jan-2019 12:00:00, NaN  
13-Jan-2019 13:00:00, NaN  
13-Jan-2019 14:00:00, NaN  
13-Jan-2019 15:00:00, NaN  
13-Jan-2019 16:00:00, NaN  
13-Jan-2019 17:00:00, NaN  
13-Jan-2019 18:00:00, NaN  
13-Jan-2019 19:00:00, NaN  
13-Jan-2019 20:00:00, NaN  
13-Jan-2019 21:00:00, NaN  
13-Jan-2019 22:00:00, NaN  
13-Jan-2019 23:00:00, NaN  
14-Jan-2019, NaN  
14-Jan-2019 01:00:00, NaN  
14-Jan-2019 02:00:00, NaN  
14-Jan-2019 03:00:00, NaN  
14-Jan-2019 04:00:00, NaN  
14-Jan-2019 05:00:00, NaN  
14-Jan-2019 06:00:00, NaN  
14-Jan-2019 07:00:00, NaN  
14-Jan-2019 08:00:00, NaN  
14-Jan-2019 09:00:00, NaN  
14-Jan-2019 10:00:00, NaN  
14-Jan-2019 11:00:00, NaN  
14-Jan-2019 12:00:00, NaN  
14-Jan-2019 13:00:00, NaN

14-Jan-2019 14:00:00, NaN  
14-Jan-2019 15:00:00, NaN  
14-Jan-2019 16:00:00, NaN  
14-Jan-2019 17:00:00, NaN  
14-Jan-2019 18:00:00, NaN  
14-Jan-2019 19:00:00, NaN  
14-Jan-2019 20:00:00, NaN  
14-Jan-2019 21:00:00, NaN  
14-Jan-2019 22:00:00, NaN  
14-Jan-2019 23:00:00, NaN  
15-Jan-2019, NaN  
15-Jan-2019 01:00:00, NaN  
15-Jan-2019 02:00:00, NaN  
15-Jan-2019 03:00:00, NaN  
15-Jan-2019 04:00:00, NaN  
15-Jan-2019 05:00:00, NaN  
15-Jan-2019 06:00:00, NaN  
15-Jan-2019 07:00:00, NaN  
15-Jan-2019 08:00:00, NaN  
15-Jan-2019 09:00:00, NaN  
15-Jan-2019 10:00:00, NaN  
15-Jan-2019 11:00:00, NaN  
15-Jan-2019 12:00:00, NaN  
15-Jan-2019 13:00:00, NaN  
15-Jan-2019 14:00:00, NaN  
15-Jan-2019 15:00:00, NaN  
15-Jan-2019 16:00:00, NaN  
15-Jan-2019 17:00:00, NaN  
15-Jan-2019 18:00:00, NaN  
15-Jan-2019 19:00:00, NaN  
15-Jan-2019 20:00:00, NaN  
15-Jan-2019 21:00:00, NaN  
15-Jan-2019 22:00:00, NaN  
15-Jan-2019 23:00:00, NaN  
16-Jan-2019, NaN  
16-Jan-2019 01:00:00, NaN  
16-Jan-2019 02:00:00, NaN  
16-Jan-2019 03:00:00, NaN  
16-Jan-2019 04:00:00, NaN  
16-Jan-2019 05:00:00, NaN  
16-Jan-2019 06:00:00, NaN  
16-Jan-2019 07:00:00, NaN  
16-Jan-2019 08:00:00, NaN  
16-Jan-2019 09:00:00, NaN  
16-Jan-2019 10:00:00, NaN  
16-Jan-2019 11:00:00, NaN  
16-Jan-2019 12:00:00, NaN  
16-Jan-2019 13:00:00, NaN  
16-Jan-2019 14:00:00, NaN  
16-Jan-2019 15:00:00, NaN  
16-Jan-2019 16:00:00, NaN  
16-Jan-2019 17:00:00, NaN  
16-Jan-2019 18:00:00, NaN  
16-Jan-2019 19:00:00, NaN  
16-Jan-2019 20:00:00, NaN  
16-Jan-2019 21:00:00, NaN  
16-Jan-2019 22:00:00, NaN  
16-Jan-2019 23:00:00, NaN  
17-Jan-2019, NaN  
17-Jan-2019 01:00:00, NaN  
17-Jan-2019 02:00:00, NaN  
17-Jan-2019 03:00:00, NaN  
17-Jan-2019 04:00:00, NaN  
17-Jan-2019 05:00:00, NaN

17-Jan-2019 06:00:00, NaN  
17-Jan-2019 07:00:00, NaN  
17-Jan-2019 08:00:00, NaN  
17-Jan-2019 09:00:00, NaN  
17-Jan-2019 10:00:00, NaN  
17-Jan-2019 11:00:00, NaN  
17-Jan-2019 12:00:00, NaN  
17-Jan-2019 13:00:00, NaN  
17-Jan-2019 14:00:00, NaN  
17-Jan-2019 15:00:00, NaN  
17-Jan-2019 16:00:00, NaN  
17-Jan-2019 17:00:00, NaN  
17-Jan-2019 18:00:00, NaN  
17-Jan-2019 19:00:00, NaN  
17-Jan-2019 20:00:00, NaN  
17-Jan-2019 21:00:00, NaN  
17-Jan-2019 22:00:00, NaN  
17-Jan-2019 23:00:00, NaN  
18-Jan-2019, NaN  
18-Jan-2019 01:00:00, NaN  
18-Jan-2019 02:00:00, NaN  
18-Jan-2019 03:00:00, NaN  
18-Jan-2019 04:00:00, NaN  
18-Jan-2019 05:00:00, NaN  
18-Jan-2019 06:00:00, NaN  
18-Jan-2019 07:00:00, NaN  
18-Jan-2019 08:00:00, NaN  
18-Jan-2019 09:00:00, NaN  
18-Jan-2019 10:00:00, NaN  
18-Jan-2019 11:00:00, NaN  
18-Jan-2019 12:00:00, NaN  
18-Jan-2019 13:00:00, NaN  
18-Jan-2019 14:00:00, NaN  
18-Jan-2019 15:00:00, NaN  
18-Jan-2019 16:00:00, NaN  
18-Jan-2019 17:00:00, NaN  
18-Jan-2019 18:00:00, NaN  
18-Jan-2019 19:00:00, NaN  
18-Jan-2019 20:00:00, NaN  
18-Jan-2019 21:00:00, NaN  
18-Jan-2019 22:00:00, NaN  
18-Jan-2019 23:00:00, NaN  
19-Jan-2019, NaN  
19-Jan-2019 01:00:00, NaN  
19-Jan-2019 02:00:00, NaN  
19-Jan-2019 03:00:00, NaN  
19-Jan-2019 04:00:00, NaN  
19-Jan-2019 05:00:00, NaN  
19-Jan-2019 06:00:00, NaN  
19-Jan-2019 07:00:00, NaN  
19-Jan-2019 08:00:00, NaN  
19-Jan-2019 09:00:00, NaN  
19-Jan-2019 10:00:00, NaN  
19-Jan-2019 11:00:00, NaN  
19-Jan-2019 12:00:00, NaN  
19-Jan-2019 13:00:00, NaN  
19-Jan-2019 14:00:00, NaN  
19-Jan-2019 15:00:00, NaN  
19-Jan-2019 16:00:00, NaN  
19-Jan-2019 17:00:00, NaN  
19-Jan-2019 18:00:00, NaN  
19-Jan-2019 19:00:00, NaN  
19-Jan-2019 20:00:00, NaN  
19-Jan-2019 21:00:00, NaN

|              |           |     |
|--------------|-----------|-----|
| 19-Jan-2019  | 22:00:00, | NaN |
| 19-Jan-2019  | 23:00:00, | NaN |
| 20-Jan-2019, |           | NaN |
| 20-Jan-2019  | 01:00:00, | NaN |
| 20-Jan-2019  | 02:00:00, | NaN |
| 20-Jan-2019  | 03:00:00, | NaN |
| 20-Jan-2019  | 04:00:00, | NaN |
| 20-Jan-2019  | 05:00:00, | NaN |
| 20-Jan-2019  | 06:00:00, | NaN |
| 20-Jan-2019  | 07:00:00, | NaN |
| 20-Jan-2019  | 08:00:00, | NaN |
| 20-Jan-2019  | 09:00:00, | NaN |
| 20-Jan-2019  | 10:00:00, | NaN |
| 20-Jan-2019  | 11:00:00, | NaN |
| 20-Jan-2019  | 12:00:00, | NaN |
| 20-Jan-2019  | 13:00:00, | NaN |
| 20-Jan-2019  | 14:00:00, | NaN |
| 20-Jan-2019  | 15:00:00, | NaN |
| 20-Jan-2019  | 16:00:00, | NaN |
| 20-Jan-2019  | 17:00:00, | NaN |
| 20-Jan-2019  | 18:00:00, | NaN |
| 20-Jan-2019  | 19:00:00, | NaN |
| 20-Jan-2019  | 20:00:00, | NaN |
| 20-Jan-2019  | 21:00:00, | NaN |
| 20-Jan-2019  | 22:00:00, | NaN |
| 20-Jan-2019  | 23:00:00, | NaN |
| 21-Jan-2019, |           | NaN |
| 21-Jan-2019  | 01:00:00, | NaN |
| 21-Jan-2019  | 02:00:00, | NaN |
| 21-Jan-2019  | 03:00:00, | NaN |
| 21-Jan-2019  | 04:00:00, | NaN |
| 21-Jan-2019  | 05:00:00, | NaN |
| 21-Jan-2019  | 06:00:00, | NaN |
| 21-Jan-2019  | 07:00:00, | NaN |
| 21-Jan-2019  | 08:00:00, | NaN |
| 21-Jan-2019  | 09:00:00, | NaN |
| 21-Jan-2019  | 10:00:00, | NaN |
| 21-Jan-2019  | 11:00:00, | NaN |
| 21-Jan-2019  | 12:00:00, | NaN |
| 21-Jan-2019  | 13:00:00, | NaN |
| 21-Jan-2019  | 14:00:00, | NaN |
| 21-Jan-2019  | 15:00:00, | NaN |
| 21-Jan-2019  | 16:00:00, | NaN |
| 21-Jan-2019  | 17:00:00, | NaN |
| 21-Jan-2019  | 18:00:00, | NaN |
| 21-Jan-2019  | 19:00:00, | NaN |
| 21-Jan-2019  | 20:00:00, | NaN |
| 21-Jan-2019  | 21:00:00, | NaN |
| 21-Jan-2019  | 22:00:00, | NaN |
| 21-Jan-2019  | 23:00:00, | NaN |
| 22-Jan-2019, |           | NaN |
| 22-Jan-2019  | 01:00:00, | NaN |
| 22-Jan-2019  | 02:00:00, | NaN |
| 22-Jan-2019  | 03:00:00, | NaN |
| 22-Jan-2019  | 04:00:00, | NaN |
| 22-Jan-2019  | 05:00:00, | NaN |
| 22-Jan-2019  | 06:00:00, | NaN |
| 22-Jan-2019  | 07:00:00, | NaN |
| 22-Jan-2019  | 08:00:00, | NaN |
| 22-Jan-2019  | 09:00:00, | NaN |
| 22-Jan-2019  | 10:00:00, | NaN |
| 22-Jan-2019  | 11:00:00, | NaN |
| 22-Jan-2019  | 12:00:00, | NaN |
| 22-Jan-2019  | 13:00:00, | NaN |

22-Jan-2019 14:00:00, NaN  
22-Jan-2019 15:00:00, NaN  
22-Jan-2019 16:00:00, NaN  
22-Jan-2019 17:00:00, NaN  
22-Jan-2019 18:00:00, NaN  
22-Jan-2019 19:00:00, NaN  
22-Jan-2019 20:00:00, NaN  
22-Jan-2019 21:00:00, NaN  
22-Jan-2019 22:00:00, NaN  
22-Jan-2019 23:00:00, NaN  
23-Jan-2019, NaN  
23-Jan-2019 01:00:00, NaN  
23-Jan-2019 02:00:00, NaN  
23-Jan-2019 03:00:00, NaN  
23-Jan-2019 04:00:00, NaN  
23-Jan-2019 05:00:00, NaN  
23-Jan-2019 06:00:00, NaN  
23-Jan-2019 07:00:00, NaN  
23-Jan-2019 08:00:00, NaN  
23-Jan-2019 09:00:00, NaN  
23-Jan-2019 10:00:00, NaN  
23-Jan-2019 11:00:00, NaN  
23-Jan-2019 12:00:00, NaN  
23-Jan-2019 13:00:00, NaN  
23-Jan-2019 14:00:00, NaN  
23-Jan-2019 15:00:00, NaN  
23-Jan-2019 16:00:00, NaN  
23-Jan-2019 17:00:00, NaN  
23-Jan-2019 18:00:00, NaN  
23-Jan-2019 19:00:00, NaN  
23-Jan-2019 20:00:00, NaN  
23-Jan-2019 21:00:00, NaN  
23-Jan-2019 22:00:00, NaN  
23-Jan-2019 23:00:00, NaN  
24-Jan-2019, NaN  
24-Jan-2019 01:00:00, NaN  
24-Jan-2019 02:00:00, NaN  
24-Jan-2019 03:00:00, NaN  
24-Jan-2019 04:00:00, NaN  
24-Jan-2019 05:00:00, NaN  
24-Jan-2019 06:00:00, NaN  
24-Jan-2019 07:00:00, NaN  
24-Jan-2019 08:00:00, NaN  
24-Jan-2019 09:00:00, NaN  
24-Jan-2019 10:00:00, NaN  
24-Jan-2019 11:00:00, NaN  
24-Jan-2019 12:00:00, NaN  
24-Jan-2019 13:00:00, NaN  
24-Jan-2019 14:00:00, NaN  
24-Jan-2019 15:00:00, NaN  
24-Jan-2019 16:00:00, NaN  
24-Jan-2019 17:00:00, NaN  
24-Jan-2019 18:00:00, NaN  
24-Jan-2019 19:00:00, NaN  
24-Jan-2019 20:00:00, NaN  
24-Jan-2019 21:00:00, NaN  
24-Jan-2019 22:00:00, NaN  
24-Jan-2019 23:00:00, NaN  
25-Jan-2019, NaN  
25-Jan-2019 01:00:00, NaN  
25-Jan-2019 02:00:00, NaN  
25-Jan-2019 03:00:00, NaN  
25-Jan-2019 04:00:00, NaN  
25-Jan-2019 05:00:00, NaN

|              |           |     |
|--------------|-----------|-----|
| 25-Jan-2019  | 06:00:00, | NaN |
| 25-Jan-2019  | 07:00:00, | NaN |
| 25-Jan-2019  | 08:00:00, | NaN |
| 25-Jan-2019  | 09:00:00, | NaN |
| 25-Jan-2019  | 10:00:00, | NaN |
| 25-Jan-2019  | 11:00:00, | NaN |
| 25-Jan-2019  | 12:00:00, | NaN |
| 25-Jan-2019  | 13:00:00, | NaN |
| 25-Jan-2019  | 14:00:00, | NaN |
| 25-Jan-2019  | 15:00:00, | NaN |
| 25-Jan-2019  | 16:00:00, | NaN |
| 25-Jan-2019  | 17:00:00, | NaN |
| 25-Jan-2019  | 18:00:00, | NaN |
| 25-Jan-2019  | 19:00:00, | NaN |
| 25-Jan-2019  | 20:00:00, | NaN |
| 25-Jan-2019  | 21:00:00, | NaN |
| 25-Jan-2019  | 22:00:00, | NaN |
| 25-Jan-2019  | 23:00:00, | NaN |
| 26-Jan-2019, | NaN       |     |
| 26-Jan-2019  | 01:00:00, | NaN |
| 26-Jan-2019  | 02:00:00, | NaN |
| 26-Jan-2019  | 03:00:00, | NaN |
| 26-Jan-2019  | 04:00:00, | NaN |
| 26-Jan-2019  | 05:00:00, | NaN |
| 26-Jan-2019  | 06:00:00, | NaN |
| 26-Jan-2019  | 07:00:00, | NaN |
| 26-Jan-2019  | 08:00:00, | NaN |
| 26-Jan-2019  | 09:00:00, | NaN |
| 26-Jan-2019  | 10:00:00, | NaN |
| 26-Jan-2019  | 11:00:00, | NaN |
| 26-Jan-2019  | 12:00:00, | NaN |
| 26-Jan-2019  | 13:00:00, | NaN |
| 26-Jan-2019  | 14:00:00, | NaN |
| 26-Jan-2019  | 15:00:00, | NaN |
| 26-Jan-2019  | 16:00:00, | NaN |
| 26-Jan-2019  | 17:00:00, | NaN |
| 26-Jan-2019  | 18:00:00, | NaN |
| 26-Jan-2019  | 19:00:00, | NaN |
| 26-Jan-2019  | 20:00:00, | NaN |
| 26-Jan-2019  | 21:00:00, | NaN |
| 26-Jan-2019  | 22:00:00, | NaN |
| 26-Jan-2019  | 23:00:00, | NaN |
| 27-Jan-2019, | NaN       |     |
| 27-Jan-2019  | 01:00:00, | NaN |
| 27-Jan-2019  | 02:00:00, | NaN |
| 27-Jan-2019  | 03:00:00, | NaN |
| 27-Jan-2019  | 04:00:00, | NaN |
| 27-Jan-2019  | 05:00:00, | NaN |
| 27-Jan-2019  | 06:00:00, | NaN |
| 27-Jan-2019  | 07:00:00, | NaN |
| 27-Jan-2019  | 08:00:00, | NaN |
| 27-Jan-2019  | 09:00:00, | NaN |
| 27-Jan-2019  | 10:00:00, | NaN |
| 27-Jan-2019  | 11:00:00, | NaN |
| 27-Jan-2019  | 12:00:00, | NaN |
| 27-Jan-2019  | 13:00:00, | NaN |
| 27-Jan-2019  | 14:00:00, | NaN |
| 27-Jan-2019  | 15:00:00, | NaN |
| 27-Jan-2019  | 16:00:00, | NaN |
| 27-Jan-2019  | 17:00:00, | NaN |
| 27-Jan-2019  | 18:00:00, | NaN |
| 27-Jan-2019  | 19:00:00, | NaN |
| 27-Jan-2019  | 20:00:00, | NaN |
| 27-Jan-2019  | 21:00:00, | NaN |

27-Jan-2019 22:00:00, NaN  
27-Jan-2019 23:00:00, NaN  
28-Jan-2019, NaN  
28-Jan-2019 01:00:00, NaN  
28-Jan-2019 02:00:00, NaN  
28-Jan-2019 03:00:00, NaN  
28-Jan-2019 04:00:00, NaN  
28-Jan-2019 05:00:00, NaN  
28-Jan-2019 06:00:00, NaN  
28-Jan-2019 07:00:00, NaN  
28-Jan-2019 08:00:00, NaN  
28-Jan-2019 09:00:00, NaN  
28-Jan-2019 10:00:00, NaN  
28-Jan-2019 11:00:00, NaN  
28-Jan-2019 12:00:00, NaN  
28-Jan-2019 13:00:00, NaN  
28-Jan-2019 14:00:00, NaN  
28-Jan-2019 15:00:00, NaN  
28-Jan-2019 16:00:00, NaN  
28-Jan-2019 17:00:00, NaN  
28-Jan-2019 18:00:00, NaN  
28-Jan-2019 19:00:00, NaN  
28-Jan-2019 20:00:00, NaN  
28-Jan-2019 21:00:00, NaN  
28-Jan-2019 22:00:00, NaN  
28-Jan-2019 23:00:00, NaN  
29-Jan-2019, NaN  
29-Jan-2019 01:00:00, NaN  
29-Jan-2019 02:00:00, NaN  
29-Jan-2019 03:00:00, NaN  
29-Jan-2019 04:00:00, NaN  
29-Jan-2019 05:00:00, NaN  
29-Jan-2019 06:00:00, NaN  
29-Jan-2019 07:00:00, NaN  
29-Jan-2019 08:00:00, NaN  
29-Jan-2019 09:00:00, NaN  
29-Jan-2019 10:00:00, NaN  
29-Jan-2019 11:00:00, NaN  
29-Jan-2019 12:00:00, NaN  
29-Jan-2019 13:00:00, NaN  
29-Jan-2019 14:00:00, NaN  
29-Jan-2019 15:00:00, NaN  
29-Jan-2019 16:00:00, NaN  
29-Jan-2019 17:00:00, NaN  
29-Jan-2019 18:00:00, NaN  
29-Jan-2019 19:00:00, NaN  
29-Jan-2019 20:00:00, NaN  
29-Jan-2019 21:00:00, NaN  
29-Jan-2019 22:00:00, NaN  
29-Jan-2019 23:00:00, NaN  
30-Jan-2019, NaN  
30-Jan-2019 01:00:00, NaN  
30-Jan-2019 02:00:00, NaN  
30-Jan-2019 03:00:00, NaN  
30-Jan-2019 04:00:00, NaN  
30-Jan-2019 05:00:00, NaN  
30-Jan-2019 06:00:00, NaN  
30-Jan-2019 07:00:00, NaN  
30-Jan-2019 08:00:00, NaN  
30-Jan-2019 09:00:00, NaN  
30-Jan-2019 10:00:00, NaN  
30-Jan-2019 11:00:00, NaN  
30-Jan-2019 12:00:00, NaN  
30-Jan-2019 13:00:00, NaN

30-Jan-2019 14:00:00, NaN  
30-Jan-2019 15:00:00, NaN  
30-Jan-2019 16:00:00, NaN  
30-Jan-2019 17:00:00, NaN  
30-Jan-2019 18:00:00, NaN  
30-Jan-2019 19:00:00, NaN  
30-Jan-2019 20:00:00, NaN  
30-Jan-2019 21:00:00, NaN  
30-Jan-2019 22:00:00, NaN  
30-Jan-2019 23:00:00, NaN  
31-Jan-2019, NaN  
31-Jan-2019 01:00:00, NaN  
31-Jan-2019 02:00:00, NaN  
31-Jan-2019 03:00:00, NaN  
31-Jan-2019 04:00:00, NaN  
31-Jan-2019 05:00:00, NaN  
31-Jan-2019 06:00:00, NaN  
31-Jan-2019 07:00:00, NaN  
31-Jan-2019 08:00:00, NaN  
31-Jan-2019 09:00:00, NaN  
31-Jan-2019 10:00:00, NaN  
31-Jan-2019 11:00:00, NaN  
31-Jan-2019 12:00:00, NaN  
31-Jan-2019 13:00:00, NaN  
31-Jan-2019 14:00:00, NaN  
31-Jan-2019 15:00:00, NaN  
31-Jan-2019 16:00:00, NaN  
31-Jan-2019 17:00:00, NaN  
31-Jan-2019 18:00:00, NaN  
31-Jan-2019 19:00:00, NaN  
31-Jan-2019 20:00:00, NaN  
31-Jan-2019 21:00:00, NaN  
31-Jan-2019 22:00:00, NaN  
31-Jan-2019 23:00:00, NaN  
01-Feb-2019, NaN  
01-Feb-2019 01:00:00, NaN  
01-Feb-2019 02:00:00, NaN  
01-Feb-2019 03:00:00, NaN  
01-Feb-2019 04:00:00, NaN  
01-Feb-2019 05:00:00, NaN  
01-Feb-2019 06:00:00, NaN  
01-Feb-2019 07:00:00, NaN  
01-Feb-2019 08:00:00, NaN  
01-Feb-2019 09:00:00, NaN  
01-Feb-2019 10:00:00, NaN  
01-Feb-2019 11:00:00, NaN  
01-Feb-2019 12:00:00, NaN  
01-Feb-2019 13:00:00, NaN  
01-Feb-2019 14:00:00, NaN  
01-Feb-2019 15:00:00, NaN  
01-Feb-2019 16:00:00, NaN  
01-Feb-2019 17:00:00, NaN  
01-Feb-2019 18:00:00, NaN  
01-Feb-2019 19:00:00, NaN  
01-Feb-2019 20:00:00, NaN  
01-Feb-2019 21:00:00, NaN  
01-Feb-2019 22:00:00, NaN  
01-Feb-2019 23:00:00, NaN  
02-Feb-2019, NaN  
02-Feb-2019 01:00:00, NaN  
02-Feb-2019 02:00:00, NaN  
02-Feb-2019 03:00:00, NaN  
02-Feb-2019 04:00:00, NaN  
02-Feb-2019 05:00:00, NaN



|              |           |     |
|--------------|-----------|-----|
| 02-Feb-2019  | 06:00:00, | NaN |
| 02-Feb-2019  | 07:00:00, | NaN |
| 02-Feb-2019  | 08:00:00, | NaN |
| 02-Feb-2019  | 09:00:00, | NaN |
| 02-Feb-2019  | 10:00:00, | NaN |
| 02-Feb-2019  | 11:00:00, | NaN |
| 02-Feb-2019  | 12:00:00, | NaN |
| 02-Feb-2019  | 13:00:00, | NaN |
| 02-Feb-2019  | 14:00:00, | NaN |
| 02-Feb-2019  | 15:00:00, | NaN |
| 02-Feb-2019  | 16:00:00, | NaN |
| 02-Feb-2019  | 17:00:00, | NaN |
| 02-Feb-2019  | 18:00:00, | NaN |
| 02-Feb-2019  | 19:00:00, | NaN |
| 02-Feb-2019  | 20:00:00, | NaN |
| 02-Feb-2019  | 21:00:00, | NaN |
| 02-Feb-2019  | 22:00:00, | NaN |
| 02-Feb-2019  | 23:00:00, | NaN |
| 03-Feb-2019, | NaN       |     |
| 03-Feb-2019  | 01:00:00, | NaN |
| 03-Feb-2019  | 02:00:00, | NaN |
| 03-Feb-2019  | 03:00:00, | NaN |
| 03-Feb-2019  | 04:00:00, | NaN |
| 03-Feb-2019  | 05:00:00, | NaN |
| 03-Feb-2019  | 06:00:00, | NaN |
| 03-Feb-2019  | 07:00:00, | NaN |
| 03-Feb-2019  | 08:00:00, | NaN |
| 03-Feb-2019  | 09:00:00, | NaN |
| 03-Feb-2019  | 10:00:00, | NaN |
| 03-Feb-2019  | 11:00:00, | NaN |
| 03-Feb-2019  | 12:00:00, | NaN |
| 03-Feb-2019  | 13:00:00, | NaN |
| 03-Feb-2019  | 14:00:00, | NaN |
| 03-Feb-2019  | 15:00:00, | NaN |
| 03-Feb-2019  | 16:00:00, | NaN |
| 03-Feb-2019  | 17:00:00, | NaN |
| 03-Feb-2019  | 18:00:00, | NaN |
| 03-Feb-2019  | 19:00:00, | NaN |
| 03-Feb-2019  | 20:00:00, | NaN |
| 03-Feb-2019  | 21:00:00, | NaN |
| 03-Feb-2019  | 22:00:00, | NaN |
| 03-Feb-2019  | 23:00:00, | NaN |
| 04-Feb-2019, | NaN       |     |
| 04-Feb-2019  | 01:00:00, | NaN |
| 04-Feb-2019  | 02:00:00, | NaN |
| 04-Feb-2019  | 03:00:00, | NaN |
| 04-Feb-2019  | 04:00:00, | NaN |
| 04-Feb-2019  | 05:00:00, | NaN |
| 04-Feb-2019  | 06:00:00, | NaN |
| 04-Feb-2019  | 07:00:00, | NaN |
| 04-Feb-2019  | 08:00:00, | NaN |
| 04-Feb-2019  | 09:00:00, | NaN |
| 04-Feb-2019  | 10:00:00, | NaN |
| 04-Feb-2019  | 11:00:00, | NaN |
| 04-Feb-2019  | 12:00:00, | NaN |
| 04-Feb-2019  | 13:00:00, | NaN |
| 04-Feb-2019  | 14:00:00, | NaN |
| 04-Feb-2019  | 15:00:00, | NaN |
| 04-Feb-2019  | 16:00:00, | NaN |
| 04-Feb-2019  | 17:00:00, | NaN |
| 04-Feb-2019  | 18:00:00, | NaN |
| 04-Feb-2019  | 19:00:00, | NaN |
| 04-Feb-2019  | 20:00:00, | NaN |
| 04-Feb-2019  | 21:00:00, | NaN |

04-Feb-2019 22:00:00, NaN  
04-Feb-2019 23:00:00, NaN  
05-Feb-2019, NaN  
05-Feb-2019 01:00:00, NaN  
05-Feb-2019 02:00:00, NaN  
05-Feb-2019 03:00:00, NaN  
05-Feb-2019 04:00:00, NaN  
05-Feb-2019 05:00:00, NaN  
05-Feb-2019 06:00:00, NaN  
05-Feb-2019 07:00:00, NaN  
05-Feb-2019 08:00:00, NaN  
05-Feb-2019 09:00:00, NaN  
05-Feb-2019 10:00:00, NaN  
05-Feb-2019 11:00:00, NaN  
05-Feb-2019 12:00:00, NaN  
05-Feb-2019 13:00:00, NaN  
05-Feb-2019 14:00:00, NaN  
05-Feb-2019 15:00:00, NaN  
05-Feb-2019 16:00:00, NaN  
05-Feb-2019 17:00:00, NaN  
05-Feb-2019 18:00:00, NaN  
05-Feb-2019 19:00:00, NaN  
05-Feb-2019 20:00:00, NaN  
05-Feb-2019 21:00:00, NaN  
05-Feb-2019 22:00:00, NaN  
05-Feb-2019 23:00:00, NaN  
06-Feb-2019, NaN  
06-Feb-2019 01:00:00, NaN  
06-Feb-2019 02:00:00, NaN  
06-Feb-2019 03:00:00, NaN  
06-Feb-2019 04:00:00, NaN  
06-Feb-2019 05:00:00, NaN  
06-Feb-2019 06:00:00, NaN  
06-Feb-2019 07:00:00, NaN  
06-Feb-2019 08:00:00, NaN  
06-Feb-2019 09:00:00, NaN  
06-Feb-2019 10:00:00, NaN  
06-Feb-2019 11:00:00, NaN  
06-Feb-2019 12:00:00, NaN  
06-Feb-2019 13:00:00, NaN  
06-Feb-2019 14:00:00, NaN  
06-Feb-2019 15:00:00, NaN  
06-Feb-2019 16:00:00, NaN  
06-Feb-2019 17:00:00, NaN  
06-Feb-2019 18:00:00, NaN  
06-Feb-2019 19:00:00, NaN  
06-Feb-2019 20:00:00, NaN  
06-Feb-2019 21:00:00, NaN  
06-Feb-2019 22:00:00, NaN  
06-Feb-2019 23:00:00, NaN  
07-Feb-2019, NaN  
07-Feb-2019 01:00:00, NaN  
07-Feb-2019 02:00:00, NaN  
07-Feb-2019 03:00:00, NaN  
07-Feb-2019 04:00:00, NaN  
07-Feb-2019 05:00:00, NaN  
07-Feb-2019 06:00:00, NaN  
07-Feb-2019 07:00:00, NaN  
07-Feb-2019 08:00:00, NaN  
07-Feb-2019 09:00:00, NaN  
07-Feb-2019 10:00:00, NaN  
07-Feb-2019 11:00:00, NaN  
07-Feb-2019 12:00:00, NaN  
07-Feb-2019 13:00:00, NaN

07-Feb-2019 14:00:00, NaN  
07-Feb-2019 15:00:00, NaN  
07-Feb-2019 16:00:00, NaN  
07-Feb-2019 17:00:00, NaN  
07-Feb-2019 18:00:00, NaN  
07-Feb-2019 19:00:00, NaN  
07-Feb-2019 20:00:00, NaN  
07-Feb-2019 21:00:00, NaN  
07-Feb-2019 22:00:00, NaN  
07-Feb-2019 23:00:00, NaN  
08-Feb-2019, NaN  
08-Feb-2019 01:00:00, NaN  
08-Feb-2019 02:00:00, NaN  
08-Feb-2019 03:00:00, NaN  
08-Feb-2019 04:00:00, NaN  
08-Feb-2019 05:00:00, NaN  
08-Feb-2019 06:00:00, NaN  
08-Feb-2019 07:00:00, NaN  
08-Feb-2019 08:00:00, NaN  
08-Feb-2019 09:00:00, NaN  
08-Feb-2019 10:00:00, NaN  
08-Feb-2019 11:00:00, NaN  
08-Feb-2019 12:00:00, NaN  
08-Feb-2019 13:00:00, NaN  
08-Feb-2019 14:00:00, NaN  
08-Feb-2019 15:00:00, NaN  
08-Feb-2019 16:00:00, NaN  
08-Feb-2019 17:00:00, NaN  
08-Feb-2019 18:00:00, NaN  
08-Feb-2019 19:00:00, NaN  
08-Feb-2019 20:00:00, NaN  
08-Feb-2019 21:00:00, NaN  
08-Feb-2019 22:00:00, NaN  
08-Feb-2019 23:00:00, NaN  
09-Feb-2019, NaN  
09-Feb-2019 01:00:00, NaN  
09-Feb-2019 02:00:00, NaN  
09-Feb-2019 03:00:00, NaN  
09-Feb-2019 04:00:00, NaN  
09-Feb-2019 05:00:00, NaN  
09-Feb-2019 06:00:00, NaN  
09-Feb-2019 07:00:00, NaN  
09-Feb-2019 08:00:00, NaN  
09-Feb-2019 09:00:00, NaN  
09-Feb-2019 10:00:00, NaN  
09-Feb-2019 11:00:00, NaN  
09-Feb-2019 12:00:00, NaN  
09-Feb-2019 13:00:00, NaN  
09-Feb-2019 14:00:00, NaN  
09-Feb-2019 15:00:00, NaN  
09-Feb-2019 16:00:00, NaN  
09-Feb-2019 17:00:00, NaN  
09-Feb-2019 18:00:00, NaN  
09-Feb-2019 19:00:00, NaN  
09-Feb-2019 20:00:00, NaN  
09-Feb-2019 21:00:00, NaN  
09-Feb-2019 22:00:00, NaN  
09-Feb-2019 23:00:00, NaN  
10-Feb-2019, NaN  
10-Feb-2019 01:00:00, NaN  
10-Feb-2019 02:00:00, NaN  
10-Feb-2019 03:00:00, NaN  
10-Feb-2019 04:00:00, NaN  
10-Feb-2019 05:00:00, NaN

|              |           |     |
|--------------|-----------|-----|
| 10-Feb-2019  | 06:00:00, | NaN |
| 10-Feb-2019  | 07:00:00, | NaN |
| 10-Feb-2019  | 08:00:00, | NaN |
| 10-Feb-2019  | 09:00:00, | NaN |
| 10-Feb-2019  | 10:00:00, | NaN |
| 10-Feb-2019  | 11:00:00, | NaN |
| 10-Feb-2019  | 12:00:00, | NaN |
| 10-Feb-2019  | 13:00:00, | NaN |
| 10-Feb-2019  | 14:00:00, | NaN |
| 10-Feb-2019  | 15:00:00, | NaN |
| 10-Feb-2019  | 16:00:00, | NaN |
| 10-Feb-2019  | 17:00:00, | NaN |
| 10-Feb-2019  | 18:00:00, | NaN |
| 10-Feb-2019  | 19:00:00, | NaN |
| 10-Feb-2019  | 20:00:00, | NaN |
| 10-Feb-2019  | 21:00:00, | NaN |
| 10-Feb-2019  | 22:00:00, | NaN |
| 10-Feb-2019  | 23:00:00, | NaN |
| 11-Feb-2019, | NaN       |     |
| 11-Feb-2019  | 01:00:00, | NaN |
| 11-Feb-2019  | 02:00:00, | NaN |
| 11-Feb-2019  | 03:00:00, | NaN |
| 11-Feb-2019  | 04:00:00, | NaN |
| 11-Feb-2019  | 05:00:00, | NaN |
| 11-Feb-2019  | 06:00:00, | NaN |
| 11-Feb-2019  | 07:00:00, | NaN |
| 11-Feb-2019  | 08:00:00, | NaN |
| 11-Feb-2019  | 09:00:00, | NaN |
| 11-Feb-2019  | 10:00:00, | NaN |
| 11-Feb-2019  | 11:00:00, | NaN |
| 11-Feb-2019  | 12:00:00, | NaN |
| 11-Feb-2019  | 13:00:00, | NaN |
| 11-Feb-2019  | 14:00:00, | NaN |
| 11-Feb-2019  | 15:00:00, | NaN |
| 11-Feb-2019  | 16:00:00, | NaN |
| 11-Feb-2019  | 17:00:00, | NaN |
| 11-Feb-2019  | 18:00:00, | NaN |
| 11-Feb-2019  | 19:00:00, | NaN |
| 11-Feb-2019  | 20:00:00, | NaN |
| 11-Feb-2019  | 21:00:00, | NaN |
| 11-Feb-2019  | 22:00:00, | NaN |
| 11-Feb-2019  | 23:00:00, | NaN |
| 12-Feb-2019, | NaN       |     |
| 12-Feb-2019  | 01:00:00, | NaN |
| 12-Feb-2019  | 02:00:00, | NaN |
| 12-Feb-2019  | 03:00:00, | NaN |
| 12-Feb-2019  | 04:00:00, | NaN |
| 12-Feb-2019  | 05:00:00, | NaN |
| 12-Feb-2019  | 06:00:00, | NaN |
| 12-Feb-2019  | 07:00:00, | NaN |
| 12-Feb-2019  | 08:00:00, | NaN |
| 12-Feb-2019  | 09:00:00, | NaN |
| 12-Feb-2019  | 10:00:00, | NaN |
| 12-Feb-2019  | 11:00:00, | NaN |
| 12-Feb-2019  | 12:00:00, | NaN |
| 12-Feb-2019  | 13:00:00, | NaN |
| 12-Feb-2019  | 14:00:00, | NaN |
| 12-Feb-2019  | 15:00:00, | NaN |
| 12-Feb-2019  | 16:00:00, | NaN |
| 12-Feb-2019  | 17:00:00, | NaN |
| 12-Feb-2019  | 18:00:00, | NaN |
| 12-Feb-2019  | 19:00:00, | NaN |
| 12-Feb-2019  | 20:00:00, | NaN |
| 12-Feb-2019  | 21:00:00, | NaN |

12-Feb-2019 22:00:00, NaN  
12-Feb-2019 23:00:00, NaN  
13-Feb-2019, NaN  
13-Feb-2019 01:00:00, NaN  
13-Feb-2019 02:00:00, NaN  
13-Feb-2019 03:00:00, NaN  
13-Feb-2019 04:00:00, NaN  
13-Feb-2019 05:00:00, NaN  
13-Feb-2019 06:00:00, NaN  
13-Feb-2019 07:00:00, NaN  
13-Feb-2019 08:00:00, NaN  
13-Feb-2019 09:00:00, NaN  
13-Feb-2019 10:00:00, NaN  
13-Feb-2019 11:00:00, NaN  
13-Feb-2019 12:00:00, NaN  
13-Feb-2019 13:00:00, NaN  
13-Feb-2019 14:00:00, NaN  
13-Feb-2019 15:00:00, NaN  
13-Feb-2019 16:00:00, NaN  
13-Feb-2019 17:00:00, NaN  
13-Feb-2019 18:00:00, NaN  
13-Feb-2019 19:00:00, NaN  
13-Feb-2019 20:00:00, NaN  
13-Feb-2019 21:00:00, NaN  
13-Feb-2019 22:00:00, NaN  
13-Feb-2019 23:00:00, NaN  
14-Feb-2019, NaN  
14-Feb-2019 01:00:00, NaN  
14-Feb-2019 02:00:00, NaN  
14-Feb-2019 03:00:00, NaN  
14-Feb-2019 04:00:00, NaN  
14-Feb-2019 05:00:00, NaN  
14-Feb-2019 06:00:00, NaN  
14-Feb-2019 07:00:00, NaN  
14-Feb-2019 08:00:00, NaN  
14-Feb-2019 09:00:00, NaN  
14-Feb-2019 10:00:00, NaN  
14-Feb-2019 11:00:00, NaN  
14-Feb-2019 12:00:00, NaN  
14-Feb-2019 13:00:00, NaN  
14-Feb-2019 14:00:00, NaN  
14-Feb-2019 15:00:00, NaN  
14-Feb-2019 16:00:00, NaN  
14-Feb-2019 17:00:00, NaN  
14-Feb-2019 18:00:00, NaN  
14-Feb-2019 19:00:00, NaN  
14-Feb-2019 20:00:00, NaN  
14-Feb-2019 21:00:00, NaN  
14-Feb-2019 22:00:00, NaN  
14-Feb-2019 23:00:00, NaN  
15-Feb-2019, NaN  
15-Feb-2019 01:00:00, NaN  
15-Feb-2019 02:00:00, NaN  
15-Feb-2019 03:00:00, NaN  
15-Feb-2019 04:00:00, NaN  
15-Feb-2019 05:00:00, NaN  
15-Feb-2019 06:00:00, NaN  
15-Feb-2019 07:00:00, NaN  
15-Feb-2019 08:00:00, NaN  
15-Feb-2019 09:00:00, NaN  
15-Feb-2019 10:00:00, NaN  
15-Feb-2019 11:00:00, NaN  
15-Feb-2019 12:00:00, NaN  
15-Feb-2019 13:00:00, NaN

15-Feb-2019 14:00:00, NaN  
15-Feb-2019 15:00:00, NaN  
15-Feb-2019 16:00:00, NaN  
15-Feb-2019 17:00:00, NaN  
15-Feb-2019 18:00:00, NaN  
15-Feb-2019 19:00:00, NaN  
15-Feb-2019 20:00:00, NaN  
15-Feb-2019 21:00:00, NaN  
15-Feb-2019 22:00:00, NaN  
15-Feb-2019 23:00:00, NaN  
16-Feb-2019, NaN  
16-Feb-2019 01:00:00, NaN  
16-Feb-2019 02:00:00, NaN  
16-Feb-2019 03:00:00, NaN  
16-Feb-2019 04:00:00, NaN  
16-Feb-2019 05:00:00, NaN  
16-Feb-2019 06:00:00, NaN  
16-Feb-2019 07:00:00, NaN  
16-Feb-2019 08:00:00, NaN  
16-Feb-2019 09:00:00, NaN  
16-Feb-2019 10:00:00, NaN  
16-Feb-2019 11:00:00, NaN  
16-Feb-2019 12:00:00, NaN  
16-Feb-2019 13:00:00, NaN  
16-Feb-2019 14:00:00, NaN  
16-Feb-2019 15:00:00, NaN  
16-Feb-2019 16:00:00, NaN  
16-Feb-2019 17:00:00, NaN  
16-Feb-2019 18:00:00, NaN  
16-Feb-2019 19:00:00, NaN  
16-Feb-2019 20:00:00, NaN  
16-Feb-2019 21:00:00, NaN  
16-Feb-2019 22:00:00, NaN  
16-Feb-2019 23:00:00, NaN  
17-Feb-2019, NaN  
17-Feb-2019 01:00:00, NaN  
17-Feb-2019 02:00:00, NaN  
17-Feb-2019 03:00:00, NaN  
17-Feb-2019 04:00:00, NaN  
17-Feb-2019 05:00:00, NaN  
17-Feb-2019 06:00:00, NaN  
17-Feb-2019 07:00:00, NaN  
17-Feb-2019 08:00:00, NaN  
17-Feb-2019 09:00:00, NaN  
17-Feb-2019 10:00:00, NaN  
17-Feb-2019 11:00:00, NaN  
17-Feb-2019 12:00:00, NaN  
17-Feb-2019 13:00:00, NaN  
17-Feb-2019 14:00:00, NaN  
17-Feb-2019 15:00:00, NaN  
17-Feb-2019 16:00:00, NaN  
17-Feb-2019 17:00:00, NaN  
17-Feb-2019 18:00:00, NaN  
17-Feb-2019 19:00:00, NaN  
17-Feb-2019 20:00:00, NaN  
17-Feb-2019 21:00:00, NaN  
17-Feb-2019 22:00:00, NaN  
17-Feb-2019 23:00:00, NaN  
18-Feb-2019, NaN  
18-Feb-2019 01:00:00, NaN  
18-Feb-2019 02:00:00, NaN  
18-Feb-2019 03:00:00, NaN  
18-Feb-2019 04:00:00, NaN  
18-Feb-2019 05:00:00, NaN

18-Feb-2019 06:00:00, NaN  
18-Feb-2019 07:00:00, NaN  
18-Feb-2019 08:00:00, NaN  
18-Feb-2019 09:00:00, NaN  
18-Feb-2019 10:00:00, NaN  
18-Feb-2019 11:00:00, NaN  
18-Feb-2019 12:00:00, NaN  
18-Feb-2019 13:00:00, NaN  
18-Feb-2019 14:00:00, NaN  
18-Feb-2019 15:00:00, NaN  
18-Feb-2019 16:00:00, NaN  
18-Feb-2019 17:00:00, NaN  
18-Feb-2019 18:00:00, NaN  
18-Feb-2019 19:00:00, NaN  
18-Feb-2019 20:00:00, NaN  
18-Feb-2019 21:00:00, NaN  
18-Feb-2019 22:00:00, NaN  
18-Feb-2019 23:00:00, NaN  
19-Feb-2019, NaN  
19-Feb-2019 01:00:00, NaN  
19-Feb-2019 02:00:00, NaN  
19-Feb-2019 03:00:00, NaN  
19-Feb-2019 04:00:00, NaN  
19-Feb-2019 05:00:00, NaN  
19-Feb-2019 06:00:00, NaN  
19-Feb-2019 07:00:00, NaN  
19-Feb-2019 08:00:00, NaN  
19-Feb-2019 09:00:00, NaN  
19-Feb-2019 10:00:00, NaN  
19-Feb-2019 11:00:00, NaN  
19-Feb-2019 12:00:00, NaN  
19-Feb-2019 13:00:00, NaN  
19-Feb-2019 14:00:00, NaN  
19-Feb-2019 15:00:00, NaN  
19-Feb-2019 16:00:00, NaN  
19-Feb-2019 17:00:00, NaN  
19-Feb-2019 18:00:00, NaN  
19-Feb-2019 19:00:00, NaN  
19-Feb-2019 20:00:00, NaN  
19-Feb-2019 21:00:00, NaN  
19-Feb-2019 22:00:00, NaN  
19-Feb-2019 23:00:00, NaN  
20-Feb-2019, NaN  
20-Feb-2019 01:00:00, NaN  
20-Feb-2019 02:00:00, NaN  
20-Feb-2019 03:00:00, NaN  
20-Feb-2019 04:00:00, NaN  
20-Feb-2019 05:00:00, NaN  
20-Feb-2019 06:00:00, NaN  
20-Feb-2019 07:00:00, NaN  
20-Feb-2019 08:00:00, NaN  
20-Feb-2019 09:00:00, NaN  
20-Feb-2019 10:00:00, NaN  
20-Feb-2019 11:00:00, NaN  
20-Feb-2019 12:00:00, NaN  
20-Feb-2019 13:00:00, NaN  
20-Feb-2019 14:00:00, NaN  
20-Feb-2019 15:00:00, NaN  
20-Feb-2019 16:00:00, NaN  
20-Feb-2019 17:00:00, NaN  
20-Feb-2019 18:00:00, NaN  
20-Feb-2019 19:00:00, NaN  
20-Feb-2019 20:00:00, NaN  
20-Feb-2019 21:00:00, NaN

|              |           |     |
|--------------|-----------|-----|
| 20-Feb-2019  | 22:00:00, | NaN |
| 20-Feb-2019  | 23:00:00, | NaN |
| 21-Feb-2019, |           | NaN |
| 21-Feb-2019  | 01:00:00, | NaN |
| 21-Feb-2019  | 02:00:00, | NaN |
| 21-Feb-2019  | 03:00:00, | NaN |
| 21-Feb-2019  | 04:00:00, | NaN |
| 21-Feb-2019  | 05:00:00, | NaN |
| 21-Feb-2019  | 06:00:00, | NaN |
| 21-Feb-2019  | 07:00:00, | NaN |
| 21-Feb-2019  | 08:00:00, | NaN |
| 21-Feb-2019  | 09:00:00, | NaN |
| 21-Feb-2019  | 10:00:00, | NaN |
| 21-Feb-2019  | 11:00:00, | NaN |
| 21-Feb-2019  | 12:00:00, | NaN |
| 21-Feb-2019  | 13:00:00, | NaN |
| 21-Feb-2019  | 14:00:00, | NaN |
| 21-Feb-2019  | 15:00:00, | NaN |
| 21-Feb-2019  | 16:00:00, | NaN |
| 21-Feb-2019  | 17:00:00, | NaN |
| 21-Feb-2019  | 18:00:00, | NaN |
| 21-Feb-2019  | 19:00:00, | NaN |
| 21-Feb-2019  | 20:00:00, | NaN |
| 21-Feb-2019  | 21:00:00, | NaN |
| 21-Feb-2019  | 22:00:00, | NaN |
| 21-Feb-2019  | 23:00:00, | NaN |
| 22-Feb-2019, |           | NaN |
| 22-Feb-2019  | 01:00:00, | NaN |
| 22-Feb-2019  | 02:00:00, | NaN |
| 22-Feb-2019  | 03:00:00, | NaN |
| 22-Feb-2019  | 04:00:00, | NaN |
| 22-Feb-2019  | 05:00:00, | NaN |
| 22-Feb-2019  | 06:00:00, | NaN |
| 22-Feb-2019  | 07:00:00, | NaN |
| 22-Feb-2019  | 08:00:00, | NaN |
| 22-Feb-2019  | 09:00:00, | NaN |
| 22-Feb-2019  | 10:00:00, | NaN |
| 22-Feb-2019  | 11:00:00, | NaN |
| 22-Feb-2019  | 12:00:00, | NaN |
| 22-Feb-2019  | 13:00:00, | NaN |
| 22-Feb-2019  | 14:00:00, | NaN |
| 22-Feb-2019  | 15:00:00, | NaN |
| 22-Feb-2019  | 16:00:00, | NaN |
| 22-Feb-2019  | 17:00:00, | NaN |
| 22-Feb-2019  | 18:00:00, | NaN |
| 22-Feb-2019  | 19:00:00, | NaN |
| 22-Feb-2019  | 20:00:00, | NaN |
| 22-Feb-2019  | 21:00:00, | NaN |
| 22-Feb-2019  | 22:00:00, | NaN |
| 22-Feb-2019  | 23:00:00, | NaN |
| 23-Feb-2019, |           | NaN |
| 23-Feb-2019  | 01:00:00, | NaN |
| 23-Feb-2019  | 02:00:00, | NaN |
| 23-Feb-2019  | 03:00:00, | NaN |
| 23-Feb-2019  | 04:00:00, | NaN |
| 23-Feb-2019  | 05:00:00, | NaN |
| 23-Feb-2019  | 06:00:00, | NaN |
| 23-Feb-2019  | 07:00:00, | NaN |
| 23-Feb-2019  | 08:00:00, | NaN |
| 23-Feb-2019  | 09:00:00, | NaN |
| 23-Feb-2019  | 10:00:00, | NaN |
| 23-Feb-2019  | 11:00:00, | NaN |
| 23-Feb-2019  | 12:00:00, | NaN |
| 23-Feb-2019  | 13:00:00, | NaN |



23-Feb-2019 14:00:00, NaN  
23-Feb-2019 15:00:00, NaN  
23-Feb-2019 16:00:00, NaN  
23-Feb-2019 17:00:00, NaN  
23-Feb-2019 18:00:00, NaN  
23-Feb-2019 19:00:00, NaN  
23-Feb-2019 20:00:00, NaN  
23-Feb-2019 21:00:00, NaN  
23-Feb-2019 22:00:00, NaN  
23-Feb-2019 23:00:00, NaN  
24-Feb-2019, NaN  
24-Feb-2019 01:00:00, NaN  
24-Feb-2019 02:00:00, NaN  
24-Feb-2019 03:00:00, NaN  
24-Feb-2019 04:00:00, NaN  
24-Feb-2019 05:00:00, NaN  
24-Feb-2019 06:00:00, NaN  
24-Feb-2019 07:00:00, NaN  
24-Feb-2019 08:00:00, NaN  
24-Feb-2019 09:00:00, NaN  
24-Feb-2019 10:00:00, NaN  
24-Feb-2019 11:00:00, NaN  
24-Feb-2019 12:00:00, NaN  
24-Feb-2019 13:00:00, NaN  
24-Feb-2019 14:00:00, NaN  
24-Feb-2019 15:00:00, NaN  
24-Feb-2019 16:00:00, NaN  
24-Feb-2019 17:00:00, NaN  
24-Feb-2019 18:00:00, NaN  
24-Feb-2019 19:00:00, NaN  
24-Feb-2019 20:00:00, NaN  
24-Feb-2019 21:00:00, NaN  
24-Feb-2019 22:00:00, NaN  
24-Feb-2019 23:00:00, NaN  
25-Feb-2019, NaN  
25-Feb-2019 01:00:00, NaN  
25-Feb-2019 02:00:00, NaN  
25-Feb-2019 03:00:00, NaN  
25-Feb-2019 04:00:00, NaN  
25-Feb-2019 05:00:00, NaN  
25-Feb-2019 06:00:00, NaN  
25-Feb-2019 07:00:00, NaN  
25-Feb-2019 08:00:00, NaN  
25-Feb-2019 09:00:00, NaN  
25-Feb-2019 10:00:00, NaN  
25-Feb-2019 11:00:00, NaN  
25-Feb-2019 12:00:00, NaN  
25-Feb-2019 13:00:00, NaN  
25-Feb-2019 14:00:00, NaN  
25-Feb-2019 15:00:00, NaN  
25-Feb-2019 16:00:00, NaN  
25-Feb-2019 17:00:00, NaN  
25-Feb-2019 18:00:00, NaN  
25-Feb-2019 19:00:00, NaN  
25-Feb-2019 20:00:00, NaN  
25-Feb-2019 21:00:00, NaN  
25-Feb-2019 22:00:00, NaN  
25-Feb-2019 23:00:00, NaN  
26-Feb-2019, NaN  
26-Feb-2019 01:00:00, NaN  
26-Feb-2019 02:00:00, NaN  
26-Feb-2019 03:00:00, NaN  
26-Feb-2019 04:00:00, NaN  
26-Feb-2019 05:00:00, NaN

|              |           |     |
|--------------|-----------|-----|
| 26-Feb-2019  | 06:00:00, | NaN |
| 26-Feb-2019  | 07:00:00, | NaN |
| 26-Feb-2019  | 08:00:00, | NaN |
| 26-Feb-2019  | 09:00:00, | NaN |
| 26-Feb-2019  | 10:00:00, | NaN |
| 26-Feb-2019  | 11:00:00, | NaN |
| 26-Feb-2019  | 12:00:00, | NaN |
| 26-Feb-2019  | 13:00:00, | NaN |
| 26-Feb-2019  | 14:00:00, | NaN |
| 26-Feb-2019  | 15:00:00, | NaN |
| 26-Feb-2019  | 16:00:00, | NaN |
| 26-Feb-2019  | 17:00:00, | NaN |
| 26-Feb-2019  | 18:00:00, | NaN |
| 26-Feb-2019  | 19:00:00, | NaN |
| 26-Feb-2019  | 20:00:00, | NaN |
| 26-Feb-2019  | 21:00:00, | NaN |
| 26-Feb-2019  | 22:00:00, | NaN |
| 26-Feb-2019  | 23:00:00, | NaN |
| 27-Feb-2019, | NaN       |     |
| 27-Feb-2019  | 01:00:00, | NaN |
| 27-Feb-2019  | 02:00:00, | NaN |
| 27-Feb-2019  | 03:00:00, | NaN |
| 27-Feb-2019  | 04:00:00, | NaN |
| 27-Feb-2019  | 05:00:00, | NaN |
| 27-Feb-2019  | 06:00:00, | NaN |
| 27-Feb-2019  | 07:00:00, | NaN |
| 27-Feb-2019  | 08:00:00, | NaN |
| 27-Feb-2019  | 09:00:00, | NaN |
| 27-Feb-2019  | 10:00:00, | NaN |
| 27-Feb-2019  | 11:00:00, | NaN |
| 27-Feb-2019  | 12:00:00, | NaN |
| 27-Feb-2019  | 13:00:00, | NaN |
| 27-Feb-2019  | 14:00:00, | NaN |
| 27-Feb-2019  | 15:00:00, | NaN |
| 27-Feb-2019  | 16:00:00, | NaN |
| 27-Feb-2019  | 17:00:00, | NaN |
| 27-Feb-2019  | 18:00:00, | NaN |
| 27-Feb-2019  | 19:00:00, | NaN |
| 27-Feb-2019  | 20:00:00, | NaN |
| 27-Feb-2019  | 21:00:00, | NaN |
| 27-Feb-2019  | 22:00:00, | NaN |
| 27-Feb-2019  | 23:00:00, | NaN |
| 28-Feb-2019, | NaN       |     |
| 28-Feb-2019  | 01:00:00, | NaN |
| 28-Feb-2019  | 02:00:00, | NaN |
| 28-Feb-2019  | 03:00:00, | NaN |
| 28-Feb-2019  | 04:00:00, | NaN |
| 28-Feb-2019  | 05:00:00, | NaN |
| 28-Feb-2019  | 06:00:00, | NaN |
| 28-Feb-2019  | 07:00:00, | NaN |
| 28-Feb-2019  | 08:00:00, | NaN |
| 28-Feb-2019  | 09:00:00, | NaN |
| 28-Feb-2019  | 10:00:00, | NaN |
| 28-Feb-2019  | 11:00:00, | NaN |
| 28-Feb-2019  | 12:00:00, | NaN |
| 28-Feb-2019  | 13:00:00, | NaN |
| 28-Feb-2019  | 14:00:00, | NaN |
| 28-Feb-2019  | 15:00:00, | NaN |
| 28-Feb-2019  | 16:00:00, | NaN |
| 28-Feb-2019  | 17:00:00, | NaN |
| 28-Feb-2019  | 18:00:00, | NaN |
| 28-Feb-2019  | 19:00:00, | NaN |
| 28-Feb-2019  | 20:00:00, | NaN |
| 28-Feb-2019  | 21:00:00, | NaN |

28-Feb-2019 22:00:00, NaN  
28-Feb-2019 23:00:00, NaN  
01-Mar-2019, NaN  
01-Mar-2019 01:00:00, NaN  
01-Mar-2019 02:00:00, NaN  
01-Mar-2019 03:00:00, NaN  
01-Mar-2019 04:00:00, NaN  
01-Mar-2019 05:00:00, NaN  
01-Mar-2019 06:00:00, NaN  
01-Mar-2019 07:00:00, NaN  
01-Mar-2019 08:00:00, NaN  
01-Mar-2019 09:00:00, NaN  
01-Mar-2019 10:00:00, NaN  
01-Mar-2019 11:00:00, NaN  
01-Mar-2019 12:00:00, NaN  
01-Mar-2019 13:00:00, NaN  
01-Mar-2019 14:00:00, NaN  
01-Mar-2019 15:00:00, NaN  
01-Mar-2019 16:00:00, NaN  
01-Mar-2019 17:00:00, NaN  
01-Mar-2019 18:00:00, NaN  
01-Mar-2019 19:00:00, NaN  
01-Mar-2019 20:00:00, NaN  
01-Mar-2019 21:00:00, NaN  
01-Mar-2019 22:00:00, NaN  
01-Mar-2019 23:00:00, NaN  
02-Mar-2019, NaN  
02-Mar-2019 01:00:00, NaN  
02-Mar-2019 02:00:00, NaN  
02-Mar-2019 03:00:00, NaN  
02-Mar-2019 04:00:00, NaN  
02-Mar-2019 05:00:00, NaN  
02-Mar-2019 06:00:00, NaN  
02-Mar-2019 07:00:00, NaN  
02-Mar-2019 08:00:00, NaN  
02-Mar-2019 09:00:00, NaN  
02-Mar-2019 10:00:00, NaN  
02-Mar-2019 11:00:00, NaN  
02-Mar-2019 12:00:00, NaN  
02-Mar-2019 13:00:00, NaN  
02-Mar-2019 14:00:00, NaN  
02-Mar-2019 15:00:00, NaN  
02-Mar-2019 16:00:00, NaN  
02-Mar-2019 17:00:00, NaN  
02-Mar-2019 18:00:00, NaN  
02-Mar-2019 19:00:00, NaN  
02-Mar-2019 20:00:00, NaN  
02-Mar-2019 21:00:00, NaN  
02-Mar-2019 22:00:00, NaN  
02-Mar-2019 23:00:00, NaN  
03-Mar-2019, NaN  
03-Mar-2019 01:00:00, NaN  
03-Mar-2019 02:00:00, NaN  
03-Mar-2019 03:00:00, NaN  
03-Mar-2019 04:00:00, NaN  
03-Mar-2019 05:00:00, NaN  
03-Mar-2019 06:00:00, NaN  
03-Mar-2019 07:00:00, NaN  
03-Mar-2019 08:00:00, NaN  
03-Mar-2019 09:00:00, NaN  
03-Mar-2019 10:00:00, NaN  
03-Mar-2019 11:00:00, NaN  
03-Mar-2019 12:00:00, NaN  
03-Mar-2019 13:00:00, NaN

03-Mar-2019 14:00:00, NaN  
03-Mar-2019 15:00:00, NaN  
03-Mar-2019 16:00:00, NaN  
03-Mar-2019 17:00:00, NaN  
03-Mar-2019 18:00:00, NaN  
03-Mar-2019 19:00:00, NaN  
03-Mar-2019 20:00:00, NaN  
03-Mar-2019 21:00:00, NaN  
03-Mar-2019 22:00:00, NaN  
03-Mar-2019 23:00:00, NaN  
04-Mar-2019, NaN  
04-Mar-2019 01:00:00, NaN  
04-Mar-2019 02:00:00, NaN  
04-Mar-2019 03:00:00, NaN  
04-Mar-2019 04:00:00, NaN  
04-Mar-2019 05:00:00, NaN  
04-Mar-2019 06:00:00, NaN  
04-Mar-2019 07:00:00, NaN  
04-Mar-2019 08:00:00, NaN  
04-Mar-2019 09:00:00, NaN  
04-Mar-2019 10:00:00, NaN  
04-Mar-2019 11:00:00, NaN  
04-Mar-2019 12:00:00, NaN  
04-Mar-2019 13:00:00, NaN  
04-Mar-2019 14:00:00, NaN  
04-Mar-2019 15:00:00, NaN  
04-Mar-2019 16:00:00, NaN  
04-Mar-2019 17:00:00, NaN  
04-Mar-2019 18:00:00, NaN  
04-Mar-2019 19:00:00, NaN  
04-Mar-2019 20:00:00, NaN  
04-Mar-2019 21:00:00, NaN  
04-Mar-2019 22:00:00, NaN  
04-Mar-2019 23:00:00, NaN  
05-Mar-2019, NaN  
05-Mar-2019 01:00:00, NaN  
05-Mar-2019 02:00:00, NaN  
05-Mar-2019 03:00:00, NaN  
05-Mar-2019 04:00:00, NaN  
05-Mar-2019 05:00:00, NaN  
05-Mar-2019 06:00:00, NaN  
05-Mar-2019 07:00:00, NaN  
05-Mar-2019 08:00:00, NaN  
05-Mar-2019 09:00:00, NaN  
05-Mar-2019 10:00:00, NaN  
05-Mar-2019 11:00:00, NaN  
05-Mar-2019 12:00:00, NaN  
05-Mar-2019 13:00:00, NaN  
05-Mar-2019 14:00:00, NaN  
05-Mar-2019 15:00:00, NaN  
05-Mar-2019 16:00:00, NaN  
05-Mar-2019 17:00:00, NaN  
05-Mar-2019 18:00:00, NaN  
05-Mar-2019 19:00:00, NaN  
05-Mar-2019 20:00:00, NaN  
05-Mar-2019 21:00:00, NaN  
05-Mar-2019 22:00:00, NaN  
05-Mar-2019 23:00:00, NaN  
06-Mar-2019, NaN  
06-Mar-2019 01:00:00, NaN  
06-Mar-2019 02:00:00, NaN  
06-Mar-2019 03:00:00, NaN  
06-Mar-2019 04:00:00, NaN  
06-Mar-2019 05:00:00, NaN

06-Mar-2019 06:00:00, NaN  
06-Mar-2019 07:00:00, NaN  
06-Mar-2019 08:00:00, NaN  
06-Mar-2019 09:00:00, NaN  
06-Mar-2019 10:00:00, NaN  
06-Mar-2019 11:00:00, NaN  
06-Mar-2019 12:00:00, NaN  
06-Mar-2019 13:00:00, NaN  
06-Mar-2019 14:00:00, NaN  
06-Mar-2019 15:00:00, NaN  
06-Mar-2019 16:00:00, NaN  
06-Mar-2019 17:00:00, NaN  
06-Mar-2019 18:00:00, NaN  
06-Mar-2019 19:00:00, NaN  
06-Mar-2019 20:00:00, NaN  
06-Mar-2019 21:00:00, NaN  
06-Mar-2019 22:00:00, NaN  
06-Mar-2019 23:00:00, NaN  
07-Mar-2019, NaN  
07-Mar-2019 01:00:00, NaN  
07-Mar-2019 02:00:00, NaN  
07-Mar-2019 03:00:00, NaN  
07-Mar-2019 04:00:00, NaN  
07-Mar-2019 05:00:00, NaN  
07-Mar-2019 06:00:00, NaN  
07-Mar-2019 07:00:00, NaN  
07-Mar-2019 08:00:00, NaN  
07-Mar-2019 09:00:00, NaN  
07-Mar-2019 10:00:00, NaN  
07-Mar-2019 11:00:00, NaN  
07-Mar-2019 12:00:00, NaN  
07-Mar-2019 13:00:00, NaN  
07-Mar-2019 14:00:00, NaN  
07-Mar-2019 15:00:00, NaN  
07-Mar-2019 16:00:00, NaN  
07-Mar-2019 17:00:00, NaN  
07-Mar-2019 18:00:00, NaN  
07-Mar-2019 19:00:00, NaN  
07-Mar-2019 20:00:00, NaN  
07-Mar-2019 21:00:00, NaN  
07-Mar-2019 22:00:00, NaN  
07-Mar-2019 23:00:00, NaN  
08-Mar-2019, NaN  
08-Mar-2019 01:00:00, NaN  
08-Mar-2019 02:00:00, NaN  
08-Mar-2019 03:00:00, NaN  
08-Mar-2019 04:00:00, NaN  
08-Mar-2019 05:00:00, NaN  
08-Mar-2019 06:00:00, NaN  
08-Mar-2019 07:00:00, NaN  
08-Mar-2019 08:00:00, NaN  
08-Mar-2019 09:00:00, NaN  
08-Mar-2019 10:00:00, NaN  
08-Mar-2019 11:00:00, NaN  
08-Mar-2019 12:00:00, NaN  
08-Mar-2019 13:00:00, NaN  
08-Mar-2019 14:00:00, NaN  
08-Mar-2019 15:00:00, NaN  
08-Mar-2019 16:00:00, NaN  
08-Mar-2019 17:00:00, NaN  
08-Mar-2019 18:00:00, NaN  
08-Mar-2019 19:00:00, NaN  
08-Mar-2019 20:00:00, NaN  
08-Mar-2019 21:00:00, NaN

08-Mar-2019 22:00:00, NaN  
08-Mar-2019 23:00:00, NaN  
09-Mar-2019, NaN  
09-Mar-2019 01:00:00, NaN  
09-Mar-2019 02:00:00, NaN  
09-Mar-2019 03:00:00, NaN  
09-Mar-2019 04:00:00, NaN  
09-Mar-2019 05:00:00, NaN  
09-Mar-2019 06:00:00, NaN  
09-Mar-2019 07:00:00, NaN  
09-Mar-2019 08:00:00, NaN  
09-Mar-2019 09:00:00, NaN  
09-Mar-2019 10:00:00, NaN  
09-Mar-2019 11:00:00, NaN  
09-Mar-2019 12:00:00, NaN  
09-Mar-2019 13:00:00, NaN  
09-Mar-2019 14:00:00, NaN  
09-Mar-2019 15:00:00, NaN  
09-Mar-2019 16:00:00, NaN  
09-Mar-2019 17:00:00, NaN  
09-Mar-2019 18:00:00, NaN  
09-Mar-2019 19:00:00, NaN  
09-Mar-2019 20:00:00, NaN  
09-Mar-2019 21:00:00, NaN  
09-Mar-2019 22:00:00, NaN  
09-Mar-2019 23:00:00, NaN  
10-Mar-2019, NaN  
10-Mar-2019 01:00:00, NaN  
10-Mar-2019 02:00:00, NaN  
10-Mar-2019 03:00:00, NaN  
10-Mar-2019 04:00:00, NaN  
10-Mar-2019 05:00:00, NaN  
10-Mar-2019 06:00:00, NaN  
10-Mar-2019 08:00:00, NaN  
10-Mar-2019 09:00:00, NaN  
10-Mar-2019 10:00:00, NaN  
10-Mar-2019 11:00:00, NaN  
10-Mar-2019 12:00:00, NaN  
10-Mar-2019 13:00:00, NaN  
10-Mar-2019 14:00:00, NaN  
10-Mar-2019 15:00:00, NaN  
10-Mar-2019 16:00:00, NaN  
10-Mar-2019 17:00:00, NaN  
10-Mar-2019 18:00:00, NaN  
10-Mar-2019 19:00:00, NaN  
10-Mar-2019 20:00:00, NaN  
10-Mar-2019 21:00:00, NaN  
10-Mar-2019 22:00:00, NaN  
10-Mar-2019 23:00:00, NaN  
11-Mar-2019, NaN  
11-Mar-2019 01:00:00, NaN  
11-Mar-2019 02:00:00, NaN  
11-Mar-2019 03:00:00, NaN  
11-Mar-2019 04:00:00, NaN  
11-Mar-2019 05:00:00, NaN  
11-Mar-2019 06:00:00, NaN  
11-Mar-2019 07:00:00, NaN  
11-Mar-2019 08:00:00, NaN  
11-Mar-2019 09:00:00, NaN  
11-Mar-2019 10:00:00, NaN  
11-Mar-2019 11:00:00, NaN  
11-Mar-2019 12:00:00, NaN  
11-Mar-2019 13:00:00, NaN  
11-Mar-2019 14:00:00, NaN

11-Mar-2019 15:00:00, NaN  
11-Mar-2019 16:00:00, NaN  
11-Mar-2019 17:00:00, NaN  
11-Mar-2019 18:00:00, NaN  
11-Mar-2019 19:00:00, NaN  
11-Mar-2019 20:00:00, NaN  
11-Mar-2019 21:00:00, NaN  
11-Mar-2019 22:00:00, NaN  
11-Mar-2019 23:00:00, NaN  
12-Mar-2019, NaN  
12-Mar-2019 01:00:00, NaN  
12-Mar-2019 02:00:00, NaN  
12-Mar-2019 03:00:00, NaN  
12-Mar-2019 04:00:00, NaN  
12-Mar-2019 05:00:00, NaN  
12-Mar-2019 06:00:00, NaN  
12-Mar-2019 07:00:00, NaN  
12-Mar-2019 08:00:00, NaN  
12-Mar-2019 09:00:00, NaN  
12-Mar-2019 10:00:00, NaN  
12-Mar-2019 11:00:00, NaN  
12-Mar-2019 12:00:00, NaN  
12-Mar-2019 13:00:00, NaN  
12-Mar-2019 14:00:00, NaN  
12-Mar-2019 15:00:00, NaN  
12-Mar-2019 16:00:00, NaN  
12-Mar-2019 17:00:00, NaN  
12-Mar-2019 18:00:00, NaN  
12-Mar-2019 19:00:00, NaN  
12-Mar-2019 20:00:00, NaN  
12-Mar-2019 21:00:00, NaN  
12-Mar-2019 22:00:00, NaN  
12-Mar-2019 23:00:00, NaN  
13-Mar-2019, NaN  
13-Mar-2019 01:00:00, NaN  
13-Mar-2019 02:00:00, NaN  
13-Mar-2019 03:00:00, NaN  
13-Mar-2019 04:00:00, NaN  
13-Mar-2019 05:00:00, NaN  
13-Mar-2019 06:00:00, NaN  
13-Mar-2019 07:00:00, NaN  
13-Mar-2019 08:00:00, NaN  
13-Mar-2019 09:00:00, NaN  
13-Mar-2019 10:00:00, NaN  
13-Mar-2019 11:00:00, NaN  
13-Mar-2019 12:00:00, NaN  
13-Mar-2019 13:00:00, NaN  
13-Mar-2019 14:00:00, NaN  
13-Mar-2019 15:00:00, NaN  
13-Mar-2019 16:00:00, NaN  
13-Mar-2019 17:00:00, NaN  
13-Mar-2019 18:00:00, NaN  
13-Mar-2019 19:00:00, NaN  
13-Mar-2019 20:00:00, NaN  
13-Mar-2019 21:00:00, NaN  
13-Mar-2019 22:00:00, NaN  
13-Mar-2019 23:00:00, NaN  
14-Mar-2019, NaN  
14-Mar-2019 01:00:00, NaN  
14-Mar-2019 02:00:00, NaN  
14-Mar-2019 03:00:00, NaN  
14-Mar-2019 04:00:00, NaN  
14-Mar-2019 05:00:00, NaN  
14-Mar-2019 06:00:00, NaN

14-Mar-2019 07:00:00, NaN  
14-Mar-2019 08:00:00, NaN  
14-Mar-2019 09:00:00, NaN  
14-Mar-2019 10:00:00, NaN  
14-Mar-2019 11:00:00, NaN  
14-Mar-2019 12:00:00, NaN  
14-Mar-2019 13:00:00, NaN  
14-Mar-2019 14:00:00, NaN  
14-Mar-2019 15:00:00, NaN  
14-Mar-2019 16:00:00, NaN  
14-Mar-2019 17:00:00, NaN  
14-Mar-2019 18:00:00, NaN  
14-Mar-2019 19:00:00, NaN  
14-Mar-2019 20:00:00, NaN  
14-Mar-2019 21:00:00, NaN  
14-Mar-2019 22:00:00, NaN  
14-Mar-2019 23:00:00, NaN  
15-Mar-2019, NaN  
15-Mar-2019 01:00:00, NaN  
15-Mar-2019 02:00:00, NaN  
15-Mar-2019 03:00:00, NaN  
15-Mar-2019 04:00:00, NaN  
15-Mar-2019 05:00:00, NaN  
15-Mar-2019 06:00:00, NaN  
15-Mar-2019 07:00:00, NaN  
15-Mar-2019 08:00:00, NaN  
15-Mar-2019 09:00:00, NaN  
15-Mar-2019 10:00:00, NaN  
15-Mar-2019 11:00:00, NaN  
15-Mar-2019 12:00:00, NaN  
15-Mar-2019 13:00:00, NaN  
15-Mar-2019 14:00:00, NaN  
15-Mar-2019 15:00:00, NaN  
15-Mar-2019 16:00:00, NaN  
15-Mar-2019 17:00:00, NaN  
15-Mar-2019 18:00:00, NaN  
15-Mar-2019 19:00:00, NaN  
15-Mar-2019 20:00:00, NaN  
15-Mar-2019 21:00:00, NaN  
15-Mar-2019 22:00:00, NaN  
15-Mar-2019 23:00:00, NaN  
16-Mar-2019, NaN  
16-Mar-2019 01:00:00, NaN  
16-Mar-2019 02:00:00, NaN  
16-Mar-2019 03:00:00, NaN  
16-Mar-2019 04:00:00, NaN  
16-Mar-2019 05:00:00, NaN  
16-Mar-2019 06:00:00, NaN  
16-Mar-2019 07:00:00, NaN  
16-Mar-2019 08:00:00, NaN  
16-Mar-2019 09:00:00, NaN  
16-Mar-2019 10:00:00, NaN  
16-Mar-2019 11:00:00, NaN  
16-Mar-2019 12:00:00, NaN  
16-Mar-2019 13:00:00, NaN  
16-Mar-2019 14:00:00, NaN  
16-Mar-2019 15:00:00, NaN  
16-Mar-2019 16:00:00, NaN  
16-Mar-2019 17:00:00, NaN  
16-Mar-2019 18:00:00, NaN  
16-Mar-2019 19:00:00, NaN  
16-Mar-2019 20:00:00, NaN  
16-Mar-2019 21:00:00, NaN  
16-Mar-2019 22:00:00, NaN



16-Mar-2019 23:00:00, NaN  
17-Mar-2019, NaN  
17-Mar-2019 01:00:00, NaN  
17-Mar-2019 02:00:00, NaN  
17-Mar-2019 03:00:00, NaN  
17-Mar-2019 04:00:00, NaN  
17-Mar-2019 05:00:00, NaN  
17-Mar-2019 06:00:00, NaN  
17-Mar-2019 07:00:00, NaN  
17-Mar-2019 08:00:00, NaN  
17-Mar-2019 09:00:00, NaN  
17-Mar-2019 10:00:00, NaN  
17-Mar-2019 11:00:00, NaN  
17-Mar-2019 12:00:00, NaN  
17-Mar-2019 13:00:00, NaN  
17-Mar-2019 14:00:00, NaN  
17-Mar-2019 15:00:00, NaN  
17-Mar-2019 16:00:00, NaN  
17-Mar-2019 17:00:00, NaN  
17-Mar-2019 18:00:00, NaN  
17-Mar-2019 19:00:00, NaN  
17-Mar-2019 20:00:00, NaN  
17-Mar-2019 21:00:00, NaN  
17-Mar-2019 22:00:00, NaN  
17-Mar-2019 23:00:00, NaN  
18-Mar-2019, NaN  
18-Mar-2019 01:00:00, NaN  
18-Mar-2019 02:00:00, NaN  
18-Mar-2019 03:00:00, NaN  
18-Mar-2019 04:00:00, NaN  
18-Mar-2019 05:00:00, NaN  
18-Mar-2019 06:00:00, NaN  
18-Mar-2019 07:00:00, NaN  
18-Mar-2019 08:00:00, NaN  
18-Mar-2019 09:00:00, NaN  
18-Mar-2019 10:00:00, NaN  
18-Mar-2019 11:00:00, NaN  
18-Mar-2019 12:00:00, NaN  
18-Mar-2019 13:00:00, NaN  
18-Mar-2019 14:00:00, NaN  
18-Mar-2019 15:00:00, NaN  
18-Mar-2019 16:00:00, NaN  
18-Mar-2019 17:00:00, NaN  
18-Mar-2019 18:00:00, NaN  
18-Mar-2019 19:00:00, NaN  
18-Mar-2019 20:00:00, NaN  
18-Mar-2019 21:00:00, NaN  
18-Mar-2019 22:00:00, NaN  
18-Mar-2019 23:00:00, NaN  
19-Mar-2019, NaN  
19-Mar-2019 01:00:00, NaN  
19-Mar-2019 02:00:00, NaN  
19-Mar-2019 03:00:00, NaN  
19-Mar-2019 04:00:00, NaN  
19-Mar-2019 05:00:00, NaN  
19-Mar-2019 06:00:00, NaN  
19-Mar-2019 07:00:00, NaN  
19-Mar-2019 08:00:00, NaN  
19-Mar-2019 09:00:00, NaN  
19-Mar-2019 10:00:00, NaN  
19-Mar-2019 11:00:00, NaN  
19-Mar-2019 12:00:00, NaN  
19-Mar-2019 13:00:00, NaN  
19-Mar-2019 14:00:00, NaN

19-Mar-2019 15:00:00, NaN  
19-Mar-2019 16:00:00, NaN  
19-Mar-2019 17:00:00, NaN  
19-Mar-2019 18:00:00, NaN  
19-Mar-2019 19:00:00, NaN  
19-Mar-2019 20:00:00, NaN  
19-Mar-2019 21:00:00, NaN  
19-Mar-2019 22:00:00, NaN  
19-Mar-2019 23:00:00, NaN  
20-Mar-2019, NaN  
20-Mar-2019 01:00:00, NaN  
20-Mar-2019 02:00:00, NaN  
20-Mar-2019 03:00:00, NaN  
20-Mar-2019 04:00:00, NaN  
20-Mar-2019 05:00:00, NaN  
20-Mar-2019 06:00:00, NaN  
20-Mar-2019 07:00:00, NaN  
20-Mar-2019 08:00:00, NaN  
20-Mar-2019 09:00:00, NaN  
20-Mar-2019 10:00:00, NaN  
20-Mar-2019 11:00:00, NaN  
20-Mar-2019 12:00:00, NaN  
20-Mar-2019 13:00:00, NaN  
20-Mar-2019 14:00:00, NaN  
20-Mar-2019 15:00:00, NaN  
20-Mar-2019 16:00:00, NaN  
20-Mar-2019 17:00:00, NaN  
20-Mar-2019 18:00:00, NaN  
20-Mar-2019 19:00:00, NaN  
20-Mar-2019 20:00:00, NaN  
20-Mar-2019 21:00:00, NaN  
20-Mar-2019 22:00:00, NaN  
20-Mar-2019 23:00:00, NaN  
21-Mar-2019, NaN  
21-Mar-2019 01:00:00, NaN  
21-Mar-2019 02:00:00, NaN  
21-Mar-2019 03:00:00, NaN  
21-Mar-2019 04:00:00, NaN  
21-Mar-2019 05:00:00, NaN  
21-Mar-2019 06:00:00, NaN  
21-Mar-2019 07:00:00, NaN  
21-Mar-2019 08:00:00, NaN  
21-Mar-2019 09:00:00, NaN  
21-Mar-2019 10:00:00, NaN  
21-Mar-2019 11:00:00, NaN  
21-Mar-2019 12:00:00, NaN  
21-Mar-2019 13:00:00, NaN  
21-Mar-2019 14:00:00, NaN  
21-Mar-2019 15:00:00, NaN  
21-Mar-2019 16:00:00, NaN  
21-Mar-2019 17:00:00, NaN  
21-Mar-2019 18:00:00, NaN  
21-Mar-2019 19:00:00, NaN  
21-Mar-2019 20:00:00, NaN  
21-Mar-2019 21:00:00, NaN  
21-Mar-2019 22:00:00, NaN  
21-Mar-2019 23:00:00, NaN  
22-Mar-2019, NaN  
22-Mar-2019 01:00:00, NaN  
22-Mar-2019 02:00:00, NaN  
22-Mar-2019 03:00:00, NaN  
22-Mar-2019 04:00:00, NaN  
22-Mar-2019 05:00:00, NaN  
22-Mar-2019 06:00:00, NaN

22-Mar-2019 07:00:00, NaN  
22-Mar-2019 08:00:00, NaN  
22-Mar-2019 09:00:00, NaN  
22-Mar-2019 10:00:00, NaN  
22-Mar-2019 11:00:00, NaN  
22-Mar-2019 12:00:00, NaN  
22-Mar-2019 13:00:00, NaN  
22-Mar-2019 14:00:00, NaN  
22-Mar-2019 15:00:00, NaN  
22-Mar-2019 16:00:00, NaN  
22-Mar-2019 17:00:00, NaN  
22-Mar-2019 18:00:00, NaN  
22-Mar-2019 19:00:00, NaN  
22-Mar-2019 20:00:00, NaN  
22-Mar-2019 21:00:00, NaN  
22-Mar-2019 22:00:00, NaN  
22-Mar-2019 23:00:00, NaN  
23-Mar-2019, NaN  
23-Mar-2019 01:00:00, NaN  
23-Mar-2019 02:00:00, NaN  
23-Mar-2019 03:00:00, NaN  
23-Mar-2019 04:00:00, NaN  
23-Mar-2019 05:00:00, NaN  
23-Mar-2019 06:00:00, NaN  
23-Mar-2019 07:00:00, NaN  
23-Mar-2019 08:00:00, NaN  
23-Mar-2019 09:00:00, NaN  
23-Mar-2019 10:00:00, NaN  
23-Mar-2019 11:00:00, NaN  
23-Mar-2019 12:00:00, NaN  
23-Mar-2019 13:00:00, NaN  
23-Mar-2019 14:00:00, NaN  
23-Mar-2019 15:00:00, NaN  
23-Mar-2019 16:00:00, NaN  
23-Mar-2019 17:00:00, NaN  
23-Mar-2019 18:00:00, NaN  
23-Mar-2019 19:00:00, NaN  
23-Mar-2019 20:00:00, NaN  
23-Mar-2019 21:00:00, NaN  
23-Mar-2019 22:00:00, NaN  
23-Mar-2019 23:00:00, NaN  
24-Mar-2019, NaN  
24-Mar-2019 01:00:00, NaN  
24-Mar-2019 02:00:00, NaN  
24-Mar-2019 03:00:00, NaN  
24-Mar-2019 04:00:00, NaN  
24-Mar-2019 05:00:00, NaN  
24-Mar-2019 06:00:00, NaN  
24-Mar-2019 07:00:00, NaN  
24-Mar-2019 08:00:00, NaN  
24-Mar-2019 09:00:00, NaN  
24-Mar-2019 10:00:00, NaN  
24-Mar-2019 11:00:00, NaN  
24-Mar-2019 12:00:00, NaN  
24-Mar-2019 13:00:00, NaN  
24-Mar-2019 14:00:00, NaN  
24-Mar-2019 15:00:00, NaN  
24-Mar-2019 16:00:00, NaN  
24-Mar-2019 17:00:00, NaN  
24-Mar-2019 18:00:00, NaN  
24-Mar-2019 19:00:00, NaN  
24-Mar-2019 20:00:00, NaN  
24-Mar-2019 21:00:00, NaN  
24-Mar-2019 22:00:00, NaN

24-Mar-2019 23:00:00, NaN  
25-Mar-2019, NaN  
25-Mar-2019 01:00:00, NaN  
25-Mar-2019 02:00:00, NaN  
25-Mar-2019 03:00:00, NaN  
25-Mar-2019 04:00:00, NaN  
25-Mar-2019 05:00:00, NaN  
25-Mar-2019 06:00:00, NaN  
25-Mar-2019 07:00:00, NaN  
25-Mar-2019 08:00:00, NaN  
25-Mar-2019 09:00:00, NaN  
25-Mar-2019 10:00:00, NaN  
25-Mar-2019 11:00:00, NaN  
25-Mar-2019 12:00:00, NaN  
25-Mar-2019 13:00:00, NaN  
25-Mar-2019 14:00:00, NaN  
25-Mar-2019 15:00:00, NaN  
25-Mar-2019 16:00:00, NaN  
25-Mar-2019 17:00:00, NaN  
25-Mar-2019 18:00:00, NaN  
25-Mar-2019 19:00:00, NaN  
25-Mar-2019 20:00:00, NaN  
25-Mar-2019 21:00:00, NaN  
25-Mar-2019 22:00:00, NaN  
25-Mar-2019 23:00:00, NaN  
26-Mar-2019, NaN  
26-Mar-2019 01:00:00, NaN  
26-Mar-2019 02:00:00, NaN  
26-Mar-2019 03:00:00, NaN  
26-Mar-2019 04:00:00, NaN  
26-Mar-2019 05:00:00, NaN  
26-Mar-2019 06:00:00, NaN  
26-Mar-2019 07:00:00, NaN  
26-Mar-2019 08:00:00, NaN  
26-Mar-2019 09:00:00, NaN  
26-Mar-2019 10:00:00, NaN  
26-Mar-2019 11:00:00, NaN  
26-Mar-2019 12:00:00, NaN  
26-Mar-2019 13:00:00, NaN  
26-Mar-2019 14:00:00, NaN  
26-Mar-2019 15:00:00, NaN  
26-Mar-2019 16:00:00, NaN  
26-Mar-2019 17:00:00, NaN  
26-Mar-2019 18:00:00, NaN  
26-Mar-2019 19:00:00, NaN  
26-Mar-2019 20:00:00, NaN  
26-Mar-2019 21:00:00, NaN  
26-Mar-2019 22:00:00, NaN  
26-Mar-2019 23:00:00, NaN  
27-Mar-2019, NaN  
27-Mar-2019 01:00:00, NaN  
27-Mar-2019 02:00:00, NaN  
27-Mar-2019 03:00:00, NaN  
27-Mar-2019 04:00:00, NaN  
27-Mar-2019 05:00:00, NaN  
27-Mar-2019 06:00:00, NaN  
27-Mar-2019 07:00:00, NaN  
27-Mar-2019 08:00:00, NaN  
27-Mar-2019 09:00:00, NaN  
27-Mar-2019 10:00:00, NaN  
27-Mar-2019 11:00:00, NaN  
27-Mar-2019 12:00:00, NaN  
27-Mar-2019 13:00:00, NaN  
27-Mar-2019 14:00:00, NaN

27-Mar-2019 15:00:00, NaN  
27-Mar-2019 16:00:00, NaN  
27-Mar-2019 17:00:00, NaN  
27-Mar-2019 18:00:00, NaN  
27-Mar-2019 19:00:00, NaN  
27-Mar-2019 20:00:00, NaN  
27-Mar-2019 21:00:00, NaN  
27-Mar-2019 22:00:00, NaN  
27-Mar-2019 23:00:00, NaN  
28-Mar-2019, NaN  
28-Mar-2019 01:00:00, NaN  
28-Mar-2019 02:00:00, NaN  
28-Mar-2019 03:00:00, NaN  
28-Mar-2019 04:00:00, NaN  
28-Mar-2019 05:00:00, NaN  
28-Mar-2019 06:00:00, NaN  
28-Mar-2019 07:00:00, NaN  
28-Mar-2019 08:00:00, NaN  
28-Mar-2019 09:00:00, NaN  
28-Mar-2019 10:00:00, NaN  
28-Mar-2019 11:00:00, NaN  
28-Mar-2019 12:00:00, NaN  
28-Mar-2019 13:00:00, NaN  
28-Mar-2019 14:00:00, NaN  
28-Mar-2019 15:00:00, NaN  
28-Mar-2019 16:00:00, NaN  
28-Mar-2019 17:00:00, NaN  
28-Mar-2019 18:00:00, NaN  
28-Mar-2019 19:00:00, NaN  
28-Mar-2019 20:00:00, NaN  
28-Mar-2019 21:00:00, NaN  
28-Mar-2019 22:00:00, NaN  
28-Mar-2019 23:00:00, NaN  
29-Mar-2019, NaN  
29-Mar-2019 01:00:00, NaN  
29-Mar-2019 02:00:00, NaN  
29-Mar-2019 03:00:00, NaN  
29-Mar-2019 04:00:00, NaN  
29-Mar-2019 05:00:00, NaN  
29-Mar-2019 06:00:00, NaN  
29-Mar-2019 07:00:00, NaN  
29-Mar-2019 08:00:00, NaN  
29-Mar-2019 09:00:00, NaN  
29-Mar-2019 10:00:00, NaN  
29-Mar-2019 11:00:00, NaN  
29-Mar-2019 12:00:00, NaN  
29-Mar-2019 13:00:00, NaN  
29-Mar-2019 14:00:00, NaN  
29-Mar-2019 15:00:00, NaN  
29-Mar-2019 16:00:00, NaN  
29-Mar-2019 17:00:00, NaN  
29-Mar-2019 18:00:00, NaN  
29-Mar-2019 19:00:00, NaN  
29-Mar-2019 20:00:00, NaN  
29-Mar-2019 21:00:00, NaN  
29-Mar-2019 22:00:00, NaN  
29-Mar-2019 23:00:00, NaN  
30-Mar-2019, NaN  
30-Mar-2019 01:00:00, NaN  
30-Mar-2019 02:00:00, NaN  
30-Mar-2019 03:00:00, NaN  
30-Mar-2019 04:00:00, NaN  
30-Mar-2019 05:00:00, NaN  
30-Mar-2019 06:00:00, NaN

30-Mar-2019 07:00:00, NaN  
30-Mar-2019 08:00:00, NaN  
30-Mar-2019 09:00:00, NaN  
30-Mar-2019 10:00:00, NaN  
30-Mar-2019 11:00:00, NaN  
30-Mar-2019 12:00:00, NaN  
30-Mar-2019 13:00:00, NaN  
30-Mar-2019 14:00:00, NaN  
30-Mar-2019 15:00:00, NaN  
30-Mar-2019 16:00:00, NaN  
30-Mar-2019 17:00:00, NaN  
30-Mar-2019 18:00:00, NaN  
30-Mar-2019 19:00:00, NaN  
30-Mar-2019 20:00:00, NaN  
30-Mar-2019 21:00:00, NaN  
30-Mar-2019 22:00:00, NaN  
30-Mar-2019 23:00:00, NaN  
31-Mar-2019, NaN  
31-Mar-2019 01:00:00, NaN  
31-Mar-2019 02:00:00, NaN  
31-Mar-2019 03:00:00, NaN  
31-Mar-2019 04:00:00, NaN  
31-Mar-2019 05:00:00, NaN  
31-Mar-2019 06:00:00, NaN  
31-Mar-2019 07:00:00, NaN  
31-Mar-2019 08:00:00, NaN  
31-Mar-2019 09:00:00, NaN  
31-Mar-2019 10:00:00, NaN  
31-Mar-2019 11:00:00, NaN  
31-Mar-2019 12:00:00, NaN  
31-Mar-2019 13:00:00, NaN  
31-Mar-2019 14:00:00, NaN  
31-Mar-2019 15:00:00, NaN  
31-Mar-2019 16:00:00, NaN  
31-Mar-2019 17:00:00, NaN  
31-Mar-2019 18:00:00, NaN  
31-Mar-2019 19:00:00, NaN  
31-Mar-2019 20:00:00, NaN  
31-Mar-2019 21:00:00, NaN  
31-Mar-2019 22:00:00, NaN  
31-Mar-2019 23:00:00, NaN  
01-Apr-2019, NaN  
01-Apr-2019 01:00:00, NaN  
01-Apr-2019 02:00:00, NaN  
01-Apr-2019 03:00:00, NaN  
01-Apr-2019 04:00:00, NaN  
01-Apr-2019 05:00:00, NaN  
01-Apr-2019 06:00:00, NaN  
01-Apr-2019 07:00:00, NaN  
01-Apr-2019 08:00:00, NaN  
01-Apr-2019 09:00:00, NaN  
01-Apr-2019 10:00:00, NaN  
01-Apr-2019 11:00:00, NaN  
01-Apr-2019 12:00:00, NaN  
01-Apr-2019 13:00:00, NaN  
01-Apr-2019 14:00:00, NaN  
01-Apr-2019 15:00:00, NaN  
01-Apr-2019 16:00:00, NaN  
01-Apr-2019 17:00:00, NaN  
01-Apr-2019 18:00:00, NaN  
01-Apr-2019 19:00:00, NaN  
01-Apr-2019 20:00:00, NaN  
01-Apr-2019 21:00:00, NaN  
01-Apr-2019 22:00:00, NaN

01-Apr-2019 23:00:00, NaN  
02-Apr-2019, NaN  
02-Apr-2019 01:00:00, NaN  
02-Apr-2019 02:00:00, NaN  
02-Apr-2019 03:00:00, NaN  
02-Apr-2019 04:00:00, NaN  
02-Apr-2019 05:00:00, NaN  
02-Apr-2019 06:00:00, NaN  
02-Apr-2019 07:00:00, NaN  
02-Apr-2019 08:00:00, NaN  
02-Apr-2019 09:00:00, NaN  
02-Apr-2019 10:00:00, NaN  
02-Apr-2019 11:00:00, NaN  
02-Apr-2019 12:00:00, NaN  
02-Apr-2019 13:00:00, NaN  
02-Apr-2019 14:00:00, NaN  
02-Apr-2019 15:00:00, NaN  
02-Apr-2019 16:00:00, NaN  
02-Apr-2019 17:00:00, NaN  
02-Apr-2019 18:00:00, NaN  
02-Apr-2019 19:00:00, NaN  
02-Apr-2019 20:00:00, NaN  
02-Apr-2019 21:00:00, NaN  
02-Apr-2019 22:00:00, NaN  
02-Apr-2019 23:00:00, NaN  
03-Apr-2019, NaN  
03-Apr-2019 01:00:00, NaN  
03-Apr-2019 02:00:00, NaN  
03-Apr-2019 03:00:00, NaN  
03-Apr-2019 04:00:00, NaN  
03-Apr-2019 05:00:00, NaN  
03-Apr-2019 06:00:00, NaN  
03-Apr-2019 07:00:00, NaN  
03-Apr-2019 08:00:00, NaN  
03-Apr-2019 09:00:00, NaN  
03-Apr-2019 10:00:00, NaN  
03-Apr-2019 11:00:00, NaN  
03-Apr-2019 12:00:00, NaN  
03-Apr-2019 13:00:00, NaN  
03-Apr-2019 14:00:00, NaN  
03-Apr-2019 15:00:00, NaN  
03-Apr-2019 16:00:00, NaN  
03-Apr-2019 17:00:00, NaN  
03-Apr-2019 18:00:00, NaN  
03-Apr-2019 19:00:00, NaN  
03-Apr-2019 20:00:00, NaN  
03-Apr-2019 21:00:00, NaN  
03-Apr-2019 22:00:00, NaN  
03-Apr-2019 23:00:00, NaN  
04-Apr-2019, NaN  
04-Apr-2019 01:00:00, NaN  
04-Apr-2019 02:00:00, NaN  
04-Apr-2019 03:00:00, NaN  
04-Apr-2019 04:00:00, NaN  
04-Apr-2019 05:00:00, NaN  
04-Apr-2019 06:00:00, NaN  
04-Apr-2019 07:00:00, NaN  
04-Apr-2019 08:00:00, NaN  
04-Apr-2019 09:00:00, NaN  
04-Apr-2019 10:00:00, NaN  
04-Apr-2019 11:00:00, NaN  
04-Apr-2019 12:00:00, NaN  
04-Apr-2019 13:00:00, NaN  
04-Apr-2019 14:00:00, NaN

04-Apr-2019 15:00:00, NaN  
04-Apr-2019 16:00:00, NaN  
04-Apr-2019 17:00:00, NaN  
04-Apr-2019 18:00:00, NaN  
04-Apr-2019 19:00:00, NaN  
04-Apr-2019 20:00:00, NaN  
04-Apr-2019 21:00:00, NaN  
04-Apr-2019 22:00:00, NaN  
04-Apr-2019 23:00:00, NaN  
05-Apr-2019, NaN  
05-Apr-2019 01:00:00, NaN  
05-Apr-2019 02:00:00, NaN  
05-Apr-2019 03:00:00, NaN  
05-Apr-2019 04:00:00, NaN  
05-Apr-2019 05:00:00, NaN  
05-Apr-2019 06:00:00, NaN  
05-Apr-2019 07:00:00, NaN  
05-Apr-2019 08:00:00, NaN  
05-Apr-2019 09:00:00, NaN  
05-Apr-2019 10:00:00, NaN  
05-Apr-2019 11:00:00, NaN  
05-Apr-2019 12:00:00, NaN  
05-Apr-2019 13:00:00, NaN  
05-Apr-2019 14:00:00, NaN  
05-Apr-2019 15:00:00, NaN  
05-Apr-2019 16:00:00, NaN  
05-Apr-2019 17:00:00, NaN  
05-Apr-2019 18:00:00, NaN  
05-Apr-2019 19:00:00, NaN  
05-Apr-2019 20:00:00, NaN  
05-Apr-2019 21:00:00, NaN  
05-Apr-2019 22:00:00, NaN  
05-Apr-2019 23:00:00, NaN  
06-Apr-2019, NaN  
06-Apr-2019 01:00:00, NaN  
06-Apr-2019 02:00:00, NaN  
06-Apr-2019 03:00:00, NaN  
06-Apr-2019 04:00:00, NaN  
06-Apr-2019 05:00:00, NaN  
06-Apr-2019 06:00:00, NaN  
06-Apr-2019 07:00:00, NaN  
06-Apr-2019 08:00:00, NaN  
06-Apr-2019 09:00:00, NaN  
06-Apr-2019 10:00:00, NaN  
06-Apr-2019 11:00:00, NaN  
06-Apr-2019 12:00:00, NaN  
06-Apr-2019 13:00:00, NaN  
06-Apr-2019 14:00:00, NaN  
06-Apr-2019 15:00:00, NaN  
06-Apr-2019 16:00:00, NaN  
06-Apr-2019 17:00:00, NaN  
06-Apr-2019 18:00:00, NaN  
06-Apr-2019 19:00:00, NaN  
06-Apr-2019 20:00:00, NaN  
06-Apr-2019 21:00:00, NaN  
06-Apr-2019 22:00:00, NaN  
06-Apr-2019 23:00:00, NaN  
07-Apr-2019, NaN  
07-Apr-2019 01:00:00, NaN  
07-Apr-2019 02:00:00, NaN  
07-Apr-2019 03:00:00, NaN  
07-Apr-2019 04:00:00, NaN  
07-Apr-2019 05:00:00, NaN  
07-Apr-2019 06:00:00, NaN



07-Apr-2019 07:00:00, NaN  
07-Apr-2019 08:00:00, NaN  
07-Apr-2019 09:00:00, NaN  
07-Apr-2019 10:00:00, NaN  
07-Apr-2019 11:00:00, NaN  
07-Apr-2019 12:00:00, NaN  
07-Apr-2019 13:00:00, NaN  
07-Apr-2019 14:00:00, NaN  
07-Apr-2019 15:00:00, NaN  
07-Apr-2019 16:00:00, NaN  
07-Apr-2019 17:00:00, NaN  
07-Apr-2019 18:00:00, NaN  
07-Apr-2019 19:00:00, NaN  
07-Apr-2019 20:00:00, NaN  
07-Apr-2019 21:00:00, NaN  
07-Apr-2019 22:00:00, NaN  
07-Apr-2019 23:00:00, NaN  
08-Apr-2019, NaN  
08-Apr-2019 01:00:00, NaN  
08-Apr-2019 02:00:00, NaN  
08-Apr-2019 03:00:00, NaN  
08-Apr-2019 04:00:00, NaN  
08-Apr-2019 05:00:00, NaN  
08-Apr-2019 06:00:00, NaN  
08-Apr-2019 07:00:00, NaN  
08-Apr-2019 08:00:00, NaN  
08-Apr-2019 09:00:00, NaN  
08-Apr-2019 10:00:00, NaN  
08-Apr-2019 11:00:00, NaN  
08-Apr-2019 12:00:00, NaN  
08-Apr-2019 13:00:00, NaN  
08-Apr-2019 14:00:00, NaN  
08-Apr-2019 15:00:00, NaN  
08-Apr-2019 16:00:00, NaN  
08-Apr-2019 17:00:00, NaN  
08-Apr-2019 18:00:00, NaN  
08-Apr-2019 19:00:00, NaN  
08-Apr-2019 20:00:00, NaN  
08-Apr-2019 21:00:00, NaN  
08-Apr-2019 22:00:00, NaN  
08-Apr-2019 23:00:00, NaN  
09-Apr-2019, NaN  
09-Apr-2019 01:00:00, NaN  
09-Apr-2019 02:00:00, NaN  
09-Apr-2019 03:00:00, NaN  
09-Apr-2019 04:00:00, NaN  
09-Apr-2019 05:00:00, NaN  
09-Apr-2019 06:00:00, NaN  
09-Apr-2019 07:00:00, NaN  
09-Apr-2019 08:00:00, NaN  
09-Apr-2019 09:00:00, NaN  
09-Apr-2019 10:00:00, NaN  
09-Apr-2019 11:00:00, NaN  
09-Apr-2019 12:00:00, NaN  
09-Apr-2019 13:00:00, NaN  
09-Apr-2019 14:00:00, NaN  
09-Apr-2019 15:00:00, NaN  
09-Apr-2019 16:00:00, NaN  
09-Apr-2019 17:00:00, NaN  
09-Apr-2019 18:00:00, NaN  
09-Apr-2019 19:00:00, NaN  
09-Apr-2019 20:00:00, NaN  
09-Apr-2019 21:00:00, NaN  
09-Apr-2019 22:00:00, NaN

09-Apr-2019 23:00:00, NaN  
10-Apr-2019, NaN  
10-Apr-2019 01:00:00, NaN  
10-Apr-2019 02:00:00, NaN  
10-Apr-2019 03:00:00, NaN  
10-Apr-2019 04:00:00, NaN  
10-Apr-2019 05:00:00, NaN  
10-Apr-2019 06:00:00, NaN  
10-Apr-2019 07:00:00, NaN  
10-Apr-2019 08:00:00, NaN  
10-Apr-2019 09:00:00, NaN  
10-Apr-2019 10:00:00, NaN  
10-Apr-2019 11:00:00, NaN  
10-Apr-2019 12:00:00, NaN  
10-Apr-2019 13:00:00, NaN  
10-Apr-2019 14:00:00, NaN  
10-Apr-2019 15:00:00, NaN  
10-Apr-2019 16:00:00, NaN  
10-Apr-2019 17:00:00, NaN  
10-Apr-2019 18:00:00, NaN  
10-Apr-2019 19:00:00, NaN  
10-Apr-2019 20:00:00, NaN  
10-Apr-2019 21:00:00, NaN  
10-Apr-2019 22:00:00, NaN  
10-Apr-2019 23:00:00, NaN  
11-Apr-2019, NaN  
11-Apr-2019 01:00:00, NaN  
11-Apr-2019 02:00:00, NaN  
11-Apr-2019 03:00:00, NaN  
11-Apr-2019 04:00:00, NaN  
11-Apr-2019 05:00:00, NaN  
11-Apr-2019 06:00:00, NaN  
11-Apr-2019 07:00:00, NaN  
11-Apr-2019 08:00:00, NaN  
11-Apr-2019 09:00:00, NaN  
11-Apr-2019 10:00:00, NaN  
11-Apr-2019 11:00:00, NaN  
11-Apr-2019 12:00:00, NaN  
11-Apr-2019 13:00:00, NaN  
11-Apr-2019 14:00:00, NaN  
11-Apr-2019 15:00:00, NaN  
11-Apr-2019 16:00:00, NaN  
11-Apr-2019 17:00:00, NaN  
11-Apr-2019 18:00:00, NaN  
11-Apr-2019 19:00:00, NaN  
11-Apr-2019 20:00:00, NaN  
11-Apr-2019 21:00:00, NaN  
11-Apr-2019 22:00:00, NaN  
11-Apr-2019 23:00:00, NaN  
12-Apr-2019, NaN  
12-Apr-2019 01:00:00, NaN  
12-Apr-2019 02:00:00, NaN  
12-Apr-2019 03:00:00, NaN  
12-Apr-2019 04:00:00, NaN  
12-Apr-2019 05:00:00, NaN  
12-Apr-2019 06:00:00, NaN  
12-Apr-2019 07:00:00, NaN  
12-Apr-2019 08:00:00, NaN  
12-Apr-2019 09:00:00, NaN  
12-Apr-2019 10:00:00, NaN  
12-Apr-2019 11:00:00, NaN  
12-Apr-2019 12:00:00, NaN  
12-Apr-2019 13:00:00, NaN  
12-Apr-2019 14:00:00, NaN

12-Apr-2019 15:00:00, NaN  
12-Apr-2019 16:00:00, NaN  
12-Apr-2019 17:00:00, NaN  
12-Apr-2019 18:00:00, NaN  
12-Apr-2019 19:00:00, NaN  
12-Apr-2019 20:00:00, NaN  
12-Apr-2019 21:00:00, NaN  
12-Apr-2019 22:00:00, NaN  
12-Apr-2019 23:00:00, NaN  
13-Apr-2019, NaN  
13-Apr-2019 01:00:00, NaN  
13-Apr-2019 02:00:00, NaN  
13-Apr-2019 03:00:00, NaN  
13-Apr-2019 04:00:00, NaN  
13-Apr-2019 05:00:00, NaN  
13-Apr-2019 06:00:00, NaN  
13-Apr-2019 07:00:00, NaN  
13-Apr-2019 08:00:00, NaN  
13-Apr-2019 09:00:00, NaN  
13-Apr-2019 10:00:00, NaN  
13-Apr-2019 11:00:00, NaN  
13-Apr-2019 12:00:00, NaN  
13-Apr-2019 13:00:00, NaN  
13-Apr-2019 14:00:00, NaN  
13-Apr-2019 15:00:00, NaN  
13-Apr-2019 16:00:00, NaN  
13-Apr-2019 17:00:00, NaN  
13-Apr-2019 18:00:00, NaN  
13-Apr-2019 19:00:00, NaN  
13-Apr-2019 20:00:00, NaN  
13-Apr-2019 21:00:00, NaN  
13-Apr-2019 22:00:00, NaN  
13-Apr-2019 23:00:00, NaN  
14-Apr-2019, NaN  
14-Apr-2019 01:00:00, NaN  
14-Apr-2019 02:00:00, NaN  
14-Apr-2019 03:00:00, NaN  
14-Apr-2019 04:00:00, NaN  
14-Apr-2019 05:00:00, NaN  
14-Apr-2019 06:00:00, NaN  
14-Apr-2019 07:00:00, NaN  
14-Apr-2019 08:00:00, NaN  
14-Apr-2019 09:00:00, NaN  
14-Apr-2019 10:00:00, NaN  
14-Apr-2019 11:00:00, NaN  
14-Apr-2019 12:00:00, NaN  
14-Apr-2019 13:00:00, NaN  
14-Apr-2019 14:00:00, NaN  
14-Apr-2019 15:00:00, NaN  
14-Apr-2019 16:00:00, NaN  
14-Apr-2019 17:00:00, NaN  
14-Apr-2019 18:00:00, NaN  
14-Apr-2019 19:00:00, NaN  
14-Apr-2019 20:00:00, NaN  
14-Apr-2019 21:00:00, NaN  
14-Apr-2019 22:00:00, NaN  
14-Apr-2019 23:00:00, NaN  
15-Apr-2019, NaN  
15-Apr-2019 01:00:00, NaN  
15-Apr-2019 02:00:00, NaN  
15-Apr-2019 03:00:00, NaN  
15-Apr-2019 04:00:00, NaN  
15-Apr-2019 05:00:00, NaN  
15-Apr-2019 06:00:00, NaN

15-Apr-2019 07:00:00, NaN  
15-Apr-2019 08:00:00, NaN  
15-Apr-2019 09:00:00, NaN  
15-Apr-2019 10:00:00, NaN  
15-Apr-2019 11:00:00, NaN  
15-Apr-2019 12:00:00, NaN  
15-Apr-2019 13:00:00, NaN  
15-Apr-2019 14:00:00, NaN  
15-Apr-2019 15:00:00, NaN  
15-Apr-2019 16:00:00, NaN  
15-Apr-2019 17:00:00, NaN  
15-Apr-2019 18:00:00, NaN  
15-Apr-2019 19:00:00, NaN  
15-Apr-2019 20:00:00, NaN  
15-Apr-2019 21:00:00, NaN  
15-Apr-2019 22:00:00, NaN  
15-Apr-2019 23:00:00, NaN  
16-Apr-2019, NaN  
16-Apr-2019 01:00:00, NaN  
16-Apr-2019 02:00:00, NaN  
16-Apr-2019 03:00:00, NaN  
16-Apr-2019 04:00:00, NaN  
16-Apr-2019 05:00:00, NaN  
16-Apr-2019 06:00:00, NaN  
16-Apr-2019 07:00:00, NaN  
16-Apr-2019 08:00:00, NaN  
16-Apr-2019 09:00:00, NaN  
16-Apr-2019 10:00:00, NaN  
16-Apr-2019 11:00:00, NaN  
16-Apr-2019 12:00:00, NaN  
16-Apr-2019 13:00:00, NaN  
16-Apr-2019 14:00:00, NaN  
16-Apr-2019 15:00:00, NaN  
16-Apr-2019 16:00:00, NaN  
16-Apr-2019 17:00:00, NaN  
16-Apr-2019 18:00:00, NaN  
16-Apr-2019 19:00:00, NaN  
16-Apr-2019 20:00:00, NaN  
16-Apr-2019 21:00:00, NaN  
16-Apr-2019 22:00:00, NaN  
16-Apr-2019 23:00:00, NaN  
17-Apr-2019, NaN  
17-Apr-2019 01:00:00, NaN  
17-Apr-2019 02:00:00, NaN  
17-Apr-2019 03:00:00, NaN  
17-Apr-2019 04:00:00, NaN  
17-Apr-2019 05:00:00, NaN  
17-Apr-2019 06:00:00, NaN  
17-Apr-2019 07:00:00, NaN  
17-Apr-2019 08:00:00, NaN  
17-Apr-2019 09:00:00, NaN  
17-Apr-2019 10:00:00, NaN  
17-Apr-2019 11:00:00, NaN  
17-Apr-2019 12:00:00, NaN  
17-Apr-2019 13:00:00, NaN  
17-Apr-2019 14:00:00, NaN  
17-Apr-2019 15:00:00, NaN  
17-Apr-2019 16:00:00, NaN  
17-Apr-2019 17:00:00, NaN  
17-Apr-2019 18:00:00, NaN  
17-Apr-2019 19:00:00, NaN  
17-Apr-2019 20:00:00, NaN  
17-Apr-2019 21:00:00, NaN  
17-Apr-2019 22:00:00, NaN

17-Apr-2019 23:00:00, NaN  
18-Apr-2019, NaN  
18-Apr-2019 01:00:00, NaN  
18-Apr-2019 02:00:00, NaN  
18-Apr-2019 03:00:00, NaN  
18-Apr-2019 04:00:00, NaN  
18-Apr-2019 05:00:00, NaN  
18-Apr-2019 06:00:00, NaN  
18-Apr-2019 07:00:00, NaN  
18-Apr-2019 08:00:00, NaN  
18-Apr-2019 09:00:00, NaN  
18-Apr-2019 10:00:00, NaN  
18-Apr-2019 11:00:00, NaN  
18-Apr-2019 12:00:00, NaN  
18-Apr-2019 13:00:00, NaN  
18-Apr-2019 14:00:00, NaN  
18-Apr-2019 15:00:00, NaN  
18-Apr-2019 16:00:00, NaN  
18-Apr-2019 17:00:00, NaN  
18-Apr-2019 18:00:00, NaN  
18-Apr-2019 19:00:00, NaN  
18-Apr-2019 20:00:00, NaN  
18-Apr-2019 21:00:00, NaN  
18-Apr-2019 22:00:00, NaN  
18-Apr-2019 23:00:00, NaN  
19-Apr-2019, NaN  
19-Apr-2019 01:00:00, NaN  
19-Apr-2019 02:00:00, NaN  
19-Apr-2019 03:00:00, NaN  
19-Apr-2019 04:00:00, NaN  
19-Apr-2019 05:00:00, NaN  
19-Apr-2019 06:00:00, NaN  
19-Apr-2019 07:00:00, NaN  
19-Apr-2019 08:00:00, NaN  
19-Apr-2019 09:00:00, NaN  
19-Apr-2019 10:00:00, NaN  
19-Apr-2019 11:00:00, NaN  
19-Apr-2019 12:00:00, NaN  
19-Apr-2019 13:00:00, NaN  
19-Apr-2019 14:00:00, NaN  
19-Apr-2019 15:00:00, NaN  
19-Apr-2019 16:00:00, NaN  
19-Apr-2019 17:00:00, NaN  
19-Apr-2019 18:00:00, NaN  
19-Apr-2019 19:00:00, NaN  
19-Apr-2019 20:00:00, NaN  
19-Apr-2019 21:00:00, NaN  
19-Apr-2019 22:00:00, NaN  
19-Apr-2019 23:00:00, NaN  
20-Apr-2019, NaN  
20-Apr-2019 01:00:00, NaN  
20-Apr-2019 02:00:00, NaN  
20-Apr-2019 03:00:00, NaN  
20-Apr-2019 04:00:00, NaN  
20-Apr-2019 05:00:00, NaN  
20-Apr-2019 06:00:00, NaN  
20-Apr-2019 07:00:00, NaN  
20-Apr-2019 08:00:00, NaN  
20-Apr-2019 09:00:00, NaN  
20-Apr-2019 10:00:00, NaN  
20-Apr-2019 11:00:00, NaN  
20-Apr-2019 12:00:00, NaN  
20-Apr-2019 13:00:00, NaN  
20-Apr-2019 14:00:00, NaN

20-Apr-2019 15:00:00, NaN  
20-Apr-2019 16:00:00, NaN  
20-Apr-2019 17:00:00, NaN  
20-Apr-2019 18:00:00, NaN  
20-Apr-2019 19:00:00, NaN  
20-Apr-2019 20:00:00, NaN  
20-Apr-2019 21:00:00, NaN  
20-Apr-2019 22:00:00, NaN  
20-Apr-2019 23:00:00, NaN  
21-Apr-2019, NaN  
21-Apr-2019 01:00:00, NaN  
21-Apr-2019 02:00:00, NaN  
21-Apr-2019 03:00:00, NaN  
21-Apr-2019 04:00:00, NaN  
21-Apr-2019 05:00:00, NaN  
21-Apr-2019 06:00:00, NaN  
21-Apr-2019 07:00:00, NaN  
21-Apr-2019 08:00:00, NaN  
21-Apr-2019 09:00:00, NaN  
21-Apr-2019 10:00:00, NaN  
21-Apr-2019 11:00:00, NaN  
21-Apr-2019 12:00:00, NaN  
21-Apr-2019 13:00:00, NaN  
21-Apr-2019 14:00:00, NaN  
21-Apr-2019 15:00:00, NaN  
21-Apr-2019 16:00:00, NaN  
21-Apr-2019 17:00:00, NaN  
21-Apr-2019 18:00:00, NaN  
21-Apr-2019 19:00:00, NaN  
21-Apr-2019 20:00:00, NaN  
21-Apr-2019 21:00:00, NaN  
21-Apr-2019 22:00:00, NaN  
21-Apr-2019 23:00:00, NaN  
22-Apr-2019, NaN  
22-Apr-2019 01:00:00, NaN  
22-Apr-2019 02:00:00, NaN  
22-Apr-2019 03:00:00, NaN  
22-Apr-2019 04:00:00, NaN  
22-Apr-2019 05:00:00, NaN  
22-Apr-2019 06:00:00, NaN  
22-Apr-2019 07:00:00, NaN  
22-Apr-2019 08:00:00, NaN  
22-Apr-2019 09:00:00, NaN  
22-Apr-2019 10:00:00, NaN  
22-Apr-2019 11:00:00, NaN  
22-Apr-2019 12:00:00, NaN  
22-Apr-2019 13:00:00, NaN  
22-Apr-2019 14:00:00, NaN  
22-Apr-2019 15:00:00, NaN  
22-Apr-2019 16:00:00, NaN  
22-Apr-2019 17:00:00, NaN  
22-Apr-2019 18:00:00, NaN  
22-Apr-2019 19:00:00, NaN  
22-Apr-2019 20:00:00, NaN  
22-Apr-2019 21:00:00, NaN  
22-Apr-2019 22:00:00, NaN  
22-Apr-2019 23:00:00, NaN  
23-Apr-2019, NaN  
23-Apr-2019 01:00:00, NaN  
23-Apr-2019 02:00:00, NaN  
23-Apr-2019 03:00:00, NaN  
23-Apr-2019 04:00:00, NaN  
23-Apr-2019 05:00:00, NaN  
23-Apr-2019 06:00:00, NaN

23-Apr-2019 07:00:00, NaN  
23-Apr-2019 08:00:00, NaN  
23-Apr-2019 09:00:00, NaN  
23-Apr-2019 10:00:00, NaN  
23-Apr-2019 11:00:00, NaN  
23-Apr-2019 12:00:00, NaN  
23-Apr-2019 13:00:00, NaN  
23-Apr-2019 14:00:00, NaN  
23-Apr-2019 15:00:00, NaN  
23-Apr-2019 16:00:00, NaN  
23-Apr-2019 17:00:00, NaN  
23-Apr-2019 18:00:00, NaN  
23-Apr-2019 19:00:00, NaN  
23-Apr-2019 20:00:00, NaN  
23-Apr-2019 21:00:00, NaN  
23-Apr-2019 22:00:00, NaN  
23-Apr-2019 23:00:00, NaN  
24-Apr-2019, NaN  
24-Apr-2019 01:00:00, NaN  
24-Apr-2019 02:00:00, NaN  
24-Apr-2019 03:00:00, NaN  
24-Apr-2019 04:00:00, NaN  
24-Apr-2019 05:00:00, NaN  
24-Apr-2019 06:00:00, NaN  
24-Apr-2019 07:00:00, NaN  
24-Apr-2019 08:00:00, NaN  
24-Apr-2019 09:00:00, NaN  
24-Apr-2019 10:00:00, NaN  
24-Apr-2019 11:00:00, NaN  
24-Apr-2019 12:00:00, NaN  
24-Apr-2019 13:00:00, NaN  
24-Apr-2019 14:00:00, NaN  
24-Apr-2019 15:00:00, NaN  
24-Apr-2019 16:00:00, NaN  
24-Apr-2019 17:00:00, NaN  
24-Apr-2019 18:00:00, NaN  
24-Apr-2019 19:00:00, NaN  
24-Apr-2019 20:00:00, NaN  
24-Apr-2019 21:00:00, NaN  
24-Apr-2019 22:00:00, NaN  
24-Apr-2019 23:00:00, NaN  
25-Apr-2019, NaN  
25-Apr-2019 01:00:00, NaN  
25-Apr-2019 02:00:00, NaN  
25-Apr-2019 03:00:00, NaN  
25-Apr-2019 04:00:00, NaN  
25-Apr-2019 05:00:00, NaN  
25-Apr-2019 06:00:00, NaN  
25-Apr-2019 07:00:00, NaN  
25-Apr-2019 08:00:00, NaN  
25-Apr-2019 09:00:00, NaN  
25-Apr-2019 10:00:00, NaN  
25-Apr-2019 11:00:00, NaN  
25-Apr-2019 12:00:00, NaN  
25-Apr-2019 13:00:00, NaN  
25-Apr-2019 14:00:00, NaN  
25-Apr-2019 15:00:00, NaN  
25-Apr-2019 16:00:00, NaN  
25-Apr-2019 17:00:00, NaN  
25-Apr-2019 18:00:00, NaN  
25-Apr-2019 19:00:00, NaN  
25-Apr-2019 20:00:00, NaN  
25-Apr-2019 21:00:00, NaN  
25-Apr-2019 22:00:00, NaN

25-Apr-2019 23:00:00, NaN  
26-Apr-2019, NaN  
26-Apr-2019 01:00:00, NaN  
26-Apr-2019 02:00:00, NaN  
26-Apr-2019 03:00:00, NaN  
26-Apr-2019 04:00:00, NaN  
26-Apr-2019 05:00:00, NaN  
26-Apr-2019 06:00:00, NaN  
26-Apr-2019 07:00:00, NaN  
26-Apr-2019 08:00:00, NaN  
26-Apr-2019 09:00:00, NaN  
26-Apr-2019 10:00:00, NaN  
26-Apr-2019 11:00:00, NaN  
26-Apr-2019 12:00:00, NaN  
26-Apr-2019 13:00:00, NaN  
26-Apr-2019 14:00:00, NaN  
26-Apr-2019 15:00:00, NaN  
26-Apr-2019 16:00:00, NaN  
26-Apr-2019 17:00:00, NaN  
26-Apr-2019 18:00:00, NaN  
26-Apr-2019 19:00:00, NaN  
26-Apr-2019 20:00:00, NaN  
26-Apr-2019 21:00:00, NaN  
26-Apr-2019 22:00:00, NaN  
26-Apr-2019 23:00:00, NaN  
27-Apr-2019, NaN  
27-Apr-2019 01:00:00, NaN  
27-Apr-2019 02:00:00, NaN  
27-Apr-2019 03:00:00, NaN  
27-Apr-2019 04:00:00, NaN  
27-Apr-2019 05:00:00, NaN  
27-Apr-2019 06:00:00, NaN  
27-Apr-2019 07:00:00, NaN  
27-Apr-2019 08:00:00, NaN  
27-Apr-2019 09:00:00, NaN  
27-Apr-2019 10:00:00, NaN  
27-Apr-2019 11:00:00, NaN  
27-Apr-2019 12:00:00, NaN  
27-Apr-2019 13:00:00, NaN  
27-Apr-2019 14:00:00, NaN  
27-Apr-2019 15:00:00, NaN  
27-Apr-2019 16:00:00, NaN  
27-Apr-2019 17:00:00, NaN  
27-Apr-2019 18:00:00, NaN  
27-Apr-2019 19:00:00, NaN  
27-Apr-2019 20:00:00, NaN  
27-Apr-2019 21:00:00, NaN  
27-Apr-2019 22:00:00, NaN  
27-Apr-2019 23:00:00, NaN  
28-Apr-2019, NaN  
28-Apr-2019 01:00:00, NaN  
28-Apr-2019 02:00:00, NaN  
28-Apr-2019 03:00:00, NaN  
28-Apr-2019 04:00:00, NaN  
28-Apr-2019 05:00:00, NaN  
28-Apr-2019 06:00:00, NaN  
28-Apr-2019 07:00:00, NaN  
28-Apr-2019 08:00:00, NaN  
28-Apr-2019 09:00:00, NaN  
28-Apr-2019 10:00:00, NaN  
28-Apr-2019 11:00:00, NaN  
28-Apr-2019 12:00:00, NaN  
28-Apr-2019 13:00:00, NaN  
28-Apr-2019 14:00:00, NaN



28-Apr-2019 15:00:00, NaN  
28-Apr-2019 16:00:00, NaN  
28-Apr-2019 17:00:00, NaN  
28-Apr-2019 18:00:00, NaN  
28-Apr-2019 19:00:00, NaN  
28-Apr-2019 20:00:00, NaN  
28-Apr-2019 21:00:00, NaN  
28-Apr-2019 22:00:00, NaN  
28-Apr-2019 23:00:00, NaN  
29-Apr-2019, NaN  
29-Apr-2019 01:00:00, NaN  
29-Apr-2019 02:00:00, NaN  
29-Apr-2019 03:00:00, NaN  
29-Apr-2019 04:00:00, NaN  
29-Apr-2019 05:00:00, NaN  
29-Apr-2019 06:00:00, NaN  
29-Apr-2019 07:00:00, NaN  
29-Apr-2019 08:00:00, NaN  
29-Apr-2019 09:00:00, NaN  
29-Apr-2019 10:00:00, NaN  
29-Apr-2019 11:00:00, NaN  
29-Apr-2019 12:00:00, NaN  
29-Apr-2019 13:00:00, NaN  
29-Apr-2019 14:00:00, NaN  
29-Apr-2019 15:00:00, NaN  
29-Apr-2019 16:00:00, NaN  
29-Apr-2019 17:00:00, NaN  
29-Apr-2019 18:00:00, NaN  
29-Apr-2019 19:00:00, NaN  
29-Apr-2019 20:00:00, NaN  
29-Apr-2019 21:00:00, NaN  
29-Apr-2019 22:00:00, NaN  
29-Apr-2019 23:00:00, NaN  
30-Apr-2019, NaN  
30-Apr-2019 01:00:00, NaN  
30-Apr-2019 02:00:00, NaN  
30-Apr-2019 03:00:00, NaN  
30-Apr-2019 04:00:00, NaN  
30-Apr-2019 05:00:00, NaN  
30-Apr-2019 06:00:00, NaN  
30-Apr-2019 07:00:00, NaN  
30-Apr-2019 08:00:00, NaN  
30-Apr-2019 09:00:00, NaN  
30-Apr-2019 10:00:00, NaN  
30-Apr-2019 11:00:00, NaN  
30-Apr-2019 12:00:00, NaN  
30-Apr-2019 13:00:00, NaN  
30-Apr-2019 14:00:00, NaN  
30-Apr-2019 15:00:00, NaN  
30-Apr-2019 16:00:00, NaN  
30-Apr-2019 17:00:00, NaN  
30-Apr-2019 18:00:00, NaN  
30-Apr-2019 19:00:00, NaN  
30-Apr-2019 20:00:00, NaN  
30-Apr-2019 21:00:00, NaN  
30-Apr-2019 22:00:00, NaN  
30-Apr-2019 23:00:00, NaN  
01-May-2019, NaN  
01-May-2019 01:00:00, NaN  
01-May-2019 02:00:00, NaN  
01-May-2019 03:00:00, NaN  
01-May-2019 04:00:00, NaN  
01-May-2019 05:00:00, NaN  
01-May-2019 06:00:00, NaN

01-May-2019 07:00:00, NaN  
01-May-2019 08:00:00, NaN  
01-May-2019 09:00:00, NaN  
01-May-2019 10:00:00, NaN  
01-May-2019 11:00:00, NaN  
01-May-2019 12:00:00, NaN  
01-May-2019 13:00:00, NaN  
01-May-2019 14:00:00, NaN  
01-May-2019 15:00:00, NaN  
01-May-2019 16:00:00, NaN  
01-May-2019 17:00:00, NaN  
01-May-2019 18:00:00, NaN  
01-May-2019 19:00:00, NaN  
01-May-2019 20:00:00, NaN  
01-May-2019 21:00:00, NaN  
01-May-2019 22:00:00, NaN  
01-May-2019 23:00:00, NaN  
02-May-2019, NaN  
02-May-2019 01:00:00, NaN  
02-May-2019 02:00:00, NaN  
02-May-2019 03:00:00, NaN  
02-May-2019 04:00:00, NaN  
02-May-2019 05:00:00, NaN  
02-May-2019 06:00:00, NaN  
02-May-2019 07:00:00, NaN  
02-May-2019 08:00:00, NaN  
02-May-2019 09:00:00, NaN  
02-May-2019 10:00:00, NaN  
02-May-2019 11:00:00, NaN  
02-May-2019 12:00:00, NaN  
02-May-2019 13:00:00, NaN  
02-May-2019 14:00:00, NaN  
02-May-2019 15:00:00, NaN  
02-May-2019 16:00:00, NaN  
02-May-2019 17:00:00, NaN  
02-May-2019 18:00:00, NaN  
02-May-2019 19:00:00, NaN  
02-May-2019 20:00:00, NaN  
02-May-2019 21:00:00, NaN  
02-May-2019 22:00:00, NaN  
02-May-2019 23:00:00, NaN  
03-May-2019, NaN  
03-May-2019 01:00:00, NaN  
03-May-2019 02:00:00, NaN  
03-May-2019 03:00:00, NaN  
03-May-2019 04:00:00, NaN  
03-May-2019 05:00:00, NaN  
03-May-2019 06:00:00, NaN  
03-May-2019 07:00:00, NaN  
03-May-2019 08:00:00, NaN  
03-May-2019 09:00:00, NaN  
03-May-2019 10:00:00, NaN  
03-May-2019 11:00:00, NaN  
03-May-2019 12:00:00, NaN  
03-May-2019 13:00:00, NaN  
03-May-2019 14:00:00, NaN  
03-May-2019 15:00:00, NaN  
03-May-2019 16:00:00, NaN  
03-May-2019 17:00:00, NaN  
03-May-2019 18:00:00, NaN  
03-May-2019 19:00:00, NaN  
03-May-2019 20:00:00, NaN  
03-May-2019 21:00:00, NaN  
03-May-2019 22:00:00, NaN

03-May-2019 23:00:00, NaN  
04-May-2019, NaN  
04-May-2019 01:00:00, NaN  
04-May-2019 02:00:00, NaN  
04-May-2019 03:00:00, NaN  
04-May-2019 04:00:00, NaN  
04-May-2019 05:00:00, NaN  
04-May-2019 06:00:00, NaN  
04-May-2019 07:00:00, NaN  
04-May-2019 08:00:00, NaN  
04-May-2019 09:00:00, NaN  
04-May-2019 10:00:00, NaN  
04-May-2019 11:00:00, NaN  
04-May-2019 12:00:00, NaN  
04-May-2019 13:00:00, NaN  
04-May-2019 14:00:00, NaN  
04-May-2019 15:00:00, NaN  
04-May-2019 16:00:00, NaN  
04-May-2019 17:00:00, NaN  
04-May-2019 18:00:00, NaN  
04-May-2019 19:00:00, NaN  
04-May-2019 20:00:00, NaN  
04-May-2019 21:00:00, NaN  
04-May-2019 22:00:00, NaN  
04-May-2019 23:00:00, NaN  
05-May-2019, NaN  
05-May-2019 01:00:00, NaN  
05-May-2019 02:00:00, NaN  
05-May-2019 03:00:00, NaN  
05-May-2019 04:00:00, NaN  
05-May-2019 05:00:00, NaN  
05-May-2019 06:00:00, NaN  
05-May-2019 07:00:00, NaN  
05-May-2019 08:00:00, NaN  
05-May-2019 09:00:00, NaN  
05-May-2019 10:00:00, NaN  
05-May-2019 11:00:00, NaN  
05-May-2019 12:00:00, NaN  
05-May-2019 13:00:00, NaN  
05-May-2019 14:00:00, NaN  
05-May-2019 15:00:00, NaN  
05-May-2019 16:00:00, NaN  
05-May-2019 17:00:00, NaN  
05-May-2019 18:00:00, NaN  
05-May-2019 19:00:00, NaN  
05-May-2019 20:00:00, NaN  
05-May-2019 21:00:00, NaN  
05-May-2019 22:00:00, NaN  
05-May-2019 23:00:00, NaN  
06-May-2019, NaN  
06-May-2019 01:00:00, NaN  
06-May-2019 02:00:00, NaN  
06-May-2019 03:00:00, NaN  
06-May-2019 04:00:00, NaN  
06-May-2019 05:00:00, NaN  
06-May-2019 06:00:00, NaN  
06-May-2019 07:00:00, NaN  
06-May-2019 08:00:00, NaN  
06-May-2019 09:00:00, NaN  
06-May-2019 10:00:00, NaN  
06-May-2019 11:00:00, NaN  
06-May-2019 12:00:00, NaN  
06-May-2019 13:00:00, NaN  
06-May-2019 14:00:00, NaN

06-May-2019 15:00:00, NaN  
06-May-2019 16:00:00, NaN  
06-May-2019 17:00:00, NaN  
06-May-2019 18:00:00, NaN  
06-May-2019 19:00:00, NaN  
06-May-2019 20:00:00, NaN  
06-May-2019 21:00:00, NaN  
06-May-2019 22:00:00, NaN  
06-May-2019 23:00:00, NaN  
07-May-2019, NaN  
07-May-2019 01:00:00, NaN  
07-May-2019 02:00:00, NaN  
07-May-2019 03:00:00, NaN  
07-May-2019 04:00:00, NaN  
07-May-2019 05:00:00, NaN  
07-May-2019 06:00:00, NaN  
07-May-2019 07:00:00, NaN  
07-May-2019 08:00:00, NaN  
07-May-2019 09:00:00, NaN  
07-May-2019 10:00:00, NaN  
07-May-2019 11:00:00, NaN  
07-May-2019 12:00:00, NaN  
07-May-2019 13:00:00, NaN  
07-May-2019 14:00:00, NaN  
07-May-2019 15:00:00, NaN  
07-May-2019 16:00:00, NaN  
07-May-2019 17:00:00, NaN  
07-May-2019 18:00:00, NaN  
07-May-2019 19:00:00, NaN  
07-May-2019 20:00:00, NaN  
07-May-2019 21:00:00, NaN  
07-May-2019 22:00:00, NaN  
07-May-2019 23:00:00, NaN  
08-May-2019, NaN  
08-May-2019 01:00:00, NaN  
08-May-2019 02:00:00, NaN  
08-May-2019 03:00:00, NaN  
08-May-2019 04:00:00, NaN  
08-May-2019 05:00:00, NaN  
08-May-2019 06:00:00, NaN  
08-May-2019 07:00:00, NaN  
08-May-2019 08:00:00, NaN  
08-May-2019 09:00:00, NaN  
08-May-2019 10:00:00, NaN  
08-May-2019 11:00:00, NaN  
08-May-2019 12:00:00, NaN  
08-May-2019 13:00:00, NaN  
08-May-2019 14:00:00, NaN  
08-May-2019 15:00:00, NaN  
08-May-2019 16:00:00, NaN  
08-May-2019 17:00:00, NaN  
08-May-2019 18:00:00, NaN  
08-May-2019 19:00:00, NaN  
08-May-2019 20:00:00, NaN  
08-May-2019 21:00:00, NaN  
08-May-2019 22:00:00, NaN  
08-May-2019 23:00:00, NaN  
09-May-2019, NaN  
09-May-2019 01:00:00, NaN  
09-May-2019 02:00:00, NaN  
09-May-2019 03:00:00, NaN  
09-May-2019 04:00:00, NaN  
09-May-2019 05:00:00, NaN  
09-May-2019 06:00:00, NaN

09-May-2019 07:00:00, NaN  
09-May-2019 08:00:00, NaN  
09-May-2019 09:00:00, NaN  
09-May-2019 10:00:00, NaN  
09-May-2019 11:00:00, NaN  
09-May-2019 12:00:00, NaN  
09-May-2019 13:00:00, NaN  
09-May-2019 14:00:00, NaN  
09-May-2019 15:00:00, NaN  
09-May-2019 16:00:00, NaN  
09-May-2019 17:00:00, NaN  
09-May-2019 18:00:00, NaN  
09-May-2019 19:00:00, NaN  
09-May-2019 20:00:00, NaN  
09-May-2019 21:00:00, NaN  
09-May-2019 22:00:00, NaN  
09-May-2019 23:00:00, NaN  
10-May-2019, NaN  
10-May-2019 01:00:00, NaN  
10-May-2019 02:00:00, NaN  
10-May-2019 03:00:00, NaN  
10-May-2019 04:00:00, NaN  
10-May-2019 05:00:00, NaN  
10-May-2019 06:00:00, NaN  
10-May-2019 07:00:00, NaN  
10-May-2019 08:00:00, NaN  
10-May-2019 09:00:00, NaN  
10-May-2019 10:00:00, NaN  
10-May-2019 11:00:00, NaN  
10-May-2019 12:00:00, NaN  
10-May-2019 13:00:00, NaN  
10-May-2019 14:00:00, NaN  
10-May-2019 15:00:00, NaN  
10-May-2019 16:00:00, NaN  
10-May-2019 17:00:00, NaN  
10-May-2019 18:00:00, NaN  
10-May-2019 19:00:00, NaN  
10-May-2019 20:00:00, NaN  
10-May-2019 21:00:00, NaN  
10-May-2019 22:00:00, NaN  
10-May-2019 23:00:00, NaN  
11-May-2019, NaN  
11-May-2019 01:00:00, NaN  
11-May-2019 02:00:00, NaN  
11-May-2019 03:00:00, NaN  
11-May-2019 04:00:00, NaN  
11-May-2019 05:00:00, NaN  
11-May-2019 06:00:00, NaN  
11-May-2019 07:00:00, NaN  
11-May-2019 08:00:00, NaN  
11-May-2019 09:00:00, NaN  
11-May-2019 10:00:00, NaN  
11-May-2019 11:00:00, NaN  
11-May-2019 12:00:00, NaN  
11-May-2019 13:00:00, NaN  
11-May-2019 14:00:00, NaN  
11-May-2019 15:00:00, NaN  
11-May-2019 16:00:00, NaN  
11-May-2019 17:00:00, NaN  
11-May-2019 18:00:00, NaN  
11-May-2019 19:00:00, NaN  
11-May-2019 20:00:00, NaN  
11-May-2019 21:00:00, NaN  
11-May-2019 22:00:00, NaN

11-May-2019 23:00:00, NaN  
12-May-2019, NaN  
12-May-2019 01:00:00, NaN  
12-May-2019 02:00:00, NaN  
12-May-2019 03:00:00, NaN  
12-May-2019 04:00:00, NaN  
12-May-2019 05:00:00, NaN  
12-May-2019 06:00:00, NaN  
12-May-2019 07:00:00, NaN  
12-May-2019 08:00:00, NaN  
12-May-2019 09:00:00, NaN  
12-May-2019 10:00:00, NaN  
12-May-2019 11:00:00, NaN  
12-May-2019 12:00:00, NaN  
12-May-2019 13:00:00, NaN  
12-May-2019 14:00:00, NaN  
12-May-2019 15:00:00, NaN  
12-May-2019 16:00:00, NaN  
12-May-2019 17:00:00, NaN  
12-May-2019 18:00:00, NaN  
12-May-2019 19:00:00, NaN  
12-May-2019 20:00:00, NaN  
12-May-2019 21:00:00, NaN  
12-May-2019 22:00:00, NaN  
12-May-2019 23:00:00, NaN  
13-May-2019, NaN  
13-May-2019 01:00:00, NaN  
13-May-2019 02:00:00, NaN  
13-May-2019 03:00:00, NaN  
13-May-2019 04:00:00, NaN  
13-May-2019 05:00:00, NaN  
13-May-2019 06:00:00, NaN  
13-May-2019 07:00:00, NaN  
13-May-2019 08:00:00, NaN  
13-May-2019 09:00:00, NaN  
13-May-2019 10:00:00, NaN  
13-May-2019 11:00:00, NaN  
13-May-2019 12:00:00, NaN  
13-May-2019 13:00:00, NaN  
13-May-2019 14:00:00, NaN  
13-May-2019 15:00:00, NaN  
13-May-2019 16:00:00, NaN  
13-May-2019 17:00:00, NaN  
13-May-2019 18:00:00, NaN  
13-May-2019 19:00:00, NaN  
13-May-2019 20:00:00, NaN  
13-May-2019 21:00:00, NaN  
13-May-2019 22:00:00, NaN  
13-May-2019 23:00:00, NaN  
14-May-2019, NaN  
14-May-2019 01:00:00, NaN  
14-May-2019 02:00:00, NaN  
14-May-2019 03:00:00, NaN  
14-May-2019 04:00:00, NaN  
14-May-2019 05:00:00, NaN  
14-May-2019 06:00:00, NaN  
14-May-2019 07:00:00, NaN  
14-May-2019 08:00:00, NaN  
14-May-2019 09:00:00, NaN  
14-May-2019 10:00:00, NaN  
14-May-2019 11:00:00, NaN  
14-May-2019 12:00:00, NaN  
14-May-2019 13:00:00, NaN  
14-May-2019 14:00:00, NaN

14-May-2019 15:00:00, NaN  
14-May-2019 16:00:00, NaN  
14-May-2019 17:00:00, NaN  
14-May-2019 18:00:00, NaN  
14-May-2019 19:00:00, NaN  
14-May-2019 20:00:00, NaN  
14-May-2019 21:00:00, NaN  
14-May-2019 22:00:00, NaN  
14-May-2019 23:00:00, NaN  
15-May-2019, NaN  
15-May-2019 01:00:00, NaN  
15-May-2019 02:00:00, NaN  
15-May-2019 03:00:00, NaN  
15-May-2019 04:00:00, NaN  
15-May-2019 05:00:00, NaN  
15-May-2019 06:00:00, NaN  
15-May-2019 07:00:00, NaN  
15-May-2019 08:00:00, NaN  
15-May-2019 09:00:00, NaN  
15-May-2019 10:00:00, NaN  
15-May-2019 11:00:00, NaN  
15-May-2019 12:00:00, NaN  
15-May-2019 13:00:00, NaN  
15-May-2019 14:00:00, NaN  
15-May-2019 15:00:00, NaN  
15-May-2019 16:00:00, NaN  
15-May-2019 17:00:00, NaN  
15-May-2019 18:00:00, NaN  
15-May-2019 19:00:00, NaN  
15-May-2019 20:00:00, NaN  
15-May-2019 21:00:00, NaN  
15-May-2019 22:00:00, NaN  
15-May-2019 23:00:00, NaN  
16-May-2019, NaN  
16-May-2019 01:00:00, NaN  
16-May-2019 02:00:00, NaN  
16-May-2019 03:00:00, NaN  
16-May-2019 04:00:00, NaN  
16-May-2019 05:00:00, NaN  
16-May-2019 06:00:00, NaN  
16-May-2019 07:00:00, NaN  
16-May-2019 08:00:00, NaN  
16-May-2019 09:00:00, NaN  
16-May-2019 10:00:00, NaN  
16-May-2019 11:00:00, NaN  
16-May-2019 12:00:00, NaN  
16-May-2019 13:00:00, NaN  
16-May-2019 14:00:00, NaN  
16-May-2019 15:00:00, NaN  
16-May-2019 16:00:00, NaN  
16-May-2019 17:00:00, NaN  
16-May-2019 18:00:00, NaN  
16-May-2019 19:00:00, NaN  
16-May-2019 20:00:00, NaN  
16-May-2019 21:00:00, NaN  
16-May-2019 22:00:00, NaN  
16-May-2019 23:00:00, NaN  
17-May-2019, NaN  
17-May-2019 01:00:00, NaN  
17-May-2019 02:00:00, NaN  
17-May-2019 03:00:00, NaN  
17-May-2019 04:00:00, NaN  
17-May-2019 05:00:00, NaN  
17-May-2019 06:00:00, NaN

17-May-2019 07:00:00, NaN  
17-May-2019 08:00:00, NaN  
17-May-2019 09:00:00, NaN  
17-May-2019 10:00:00, NaN  
17-May-2019 11:00:00, NaN  
17-May-2019 12:00:00, NaN  
17-May-2019 13:00:00, NaN  
17-May-2019 14:00:00, NaN  
17-May-2019 15:00:00, NaN  
17-May-2019 16:00:00, NaN  
17-May-2019 17:00:00, NaN  
17-May-2019 18:00:00, NaN  
17-May-2019 19:00:00, NaN  
17-May-2019 20:00:00, NaN  
17-May-2019 21:00:00, NaN  
17-May-2019 22:00:00, NaN  
17-May-2019 23:00:00, NaN  
18-May-2019, NaN  
18-May-2019 01:00:00, NaN  
18-May-2019 02:00:00, NaN  
18-May-2019 03:00:00, NaN  
18-May-2019 04:00:00, NaN  
18-May-2019 05:00:00, NaN  
18-May-2019 06:00:00, NaN  
18-May-2019 07:00:00, NaN  
18-May-2019 08:00:00, NaN  
18-May-2019 09:00:00, NaN  
18-May-2019 10:00:00, NaN  
18-May-2019 11:00:00, NaN  
18-May-2019 12:00:00, NaN  
18-May-2019 13:00:00, NaN  
18-May-2019 14:00:00, NaN  
18-May-2019 15:00:00, NaN  
18-May-2019 16:00:00, NaN  
18-May-2019 17:00:00, NaN  
18-May-2019 18:00:00, NaN  
18-May-2019 19:00:00, NaN  
18-May-2019 20:00:00, NaN  
18-May-2019 21:00:00, NaN  
18-May-2019 22:00:00, NaN  
18-May-2019 23:00:00, NaN  
19-May-2019, NaN  
19-May-2019 01:00:00, NaN  
19-May-2019 02:00:00, NaN  
19-May-2019 03:00:00, NaN  
19-May-2019 04:00:00, NaN  
19-May-2019 05:00:00, NaN  
19-May-2019 06:00:00, NaN  
19-May-2019 07:00:00, NaN  
19-May-2019 08:00:00, NaN  
19-May-2019 09:00:00, NaN  
19-May-2019 10:00:00, NaN  
19-May-2019 11:00:00, NaN  
19-May-2019 12:00:00, NaN  
19-May-2019 13:00:00, NaN  
19-May-2019 14:00:00, NaN  
19-May-2019 15:00:00, NaN  
19-May-2019 16:00:00, NaN  
19-May-2019 17:00:00, NaN  
19-May-2019 18:00:00, NaN  
19-May-2019 19:00:00, NaN  
19-May-2019 20:00:00, NaN  
19-May-2019 21:00:00, NaN  
19-May-2019 22:00:00, NaN



19-May-2019 23:00:00, NaN  
20-May-2019, NaN  
20-May-2019 01:00:00, NaN  
20-May-2019 02:00:00, NaN  
20-May-2019 03:00:00, NaN  
20-May-2019 04:00:00, NaN  
20-May-2019 05:00:00, NaN  
20-May-2019 06:00:00, NaN  
20-May-2019 07:00:00, NaN  
20-May-2019 08:00:00, NaN  
20-May-2019 09:00:00, NaN  
20-May-2019 10:00:00, NaN  
20-May-2019 11:00:00, NaN  
20-May-2019 12:00:00, NaN  
20-May-2019 13:00:00, NaN  
20-May-2019 14:00:00, NaN  
20-May-2019 15:00:00, NaN  
20-May-2019 16:00:00, NaN  
20-May-2019 17:00:00, NaN  
20-May-2019 18:00:00, NaN  
20-May-2019 19:00:00, NaN  
20-May-2019 20:00:00, NaN  
20-May-2019 21:00:00, NaN  
20-May-2019 22:00:00, NaN  
20-May-2019 23:00:00, NaN  
21-May-2019, NaN  
21-May-2019 01:00:00, NaN  
21-May-2019 02:00:00, NaN  
21-May-2019 03:00:00, NaN  
21-May-2019 04:00:00, NaN  
21-May-2019 05:00:00, NaN  
21-May-2019 06:00:00, NaN  
21-May-2019 07:00:00, NaN  
21-May-2019 08:00:00, NaN  
21-May-2019 09:00:00, NaN  
21-May-2019 10:00:00, NaN  
21-May-2019 11:00:00, NaN  
21-May-2019 12:00:00, NaN  
21-May-2019 13:00:00, NaN  
21-May-2019 14:00:00, NaN  
21-May-2019 15:00:00, NaN  
21-May-2019 16:00:00, NaN  
21-May-2019 17:00:00, NaN  
21-May-2019 18:00:00, NaN  
21-May-2019 19:00:00, NaN  
21-May-2019 20:00:00, NaN  
21-May-2019 21:00:00, NaN  
21-May-2019 22:00:00, NaN  
21-May-2019 23:00:00, NaN  
22-May-2019, NaN  
22-May-2019 01:00:00, NaN  
22-May-2019 02:00:00, NaN  
22-May-2019 03:00:00, NaN  
22-May-2019 04:00:00, NaN  
22-May-2019 05:00:00, NaN  
22-May-2019 06:00:00, NaN  
22-May-2019 07:00:00, NaN  
22-May-2019 08:00:00, NaN  
22-May-2019 09:00:00, NaN  
22-May-2019 10:00:00, NaN  
22-May-2019 11:00:00, NaN  
22-May-2019 12:00:00, NaN  
22-May-2019 13:00:00, NaN  
22-May-2019 14:00:00, NaN

22-May-2019 15:00:00, NaN  
22-May-2019 16:00:00, NaN  
22-May-2019 17:00:00, NaN  
22-May-2019 18:00:00, NaN  
22-May-2019 19:00:00, NaN  
22-May-2019 20:00:00, NaN  
22-May-2019 21:00:00, NaN  
22-May-2019 22:00:00, NaN  
22-May-2019 23:00:00, NaN  
23-May-2019, NaN  
23-May-2019 01:00:00, NaN  
23-May-2019 02:00:00, NaN  
23-May-2019 03:00:00, NaN  
23-May-2019 04:00:00, NaN  
23-May-2019 05:00:00, NaN  
23-May-2019 06:00:00, NaN  
23-May-2019 07:00:00, NaN  
23-May-2019 08:00:00, NaN  
23-May-2019 09:00:00, NaN  
23-May-2019 10:00:00, NaN  
23-May-2019 11:00:00, NaN  
23-May-2019 12:00:00, NaN  
23-May-2019 13:00:00, NaN  
23-May-2019 14:00:00, NaN  
23-May-2019 15:00:00, NaN  
23-May-2019 16:00:00, NaN  
23-May-2019 17:00:00, NaN  
23-May-2019 18:00:00, NaN  
23-May-2019 19:00:00, NaN  
23-May-2019 20:00:00, NaN  
23-May-2019 21:00:00, NaN  
23-May-2019 22:00:00, NaN  
23-May-2019 23:00:00, NaN  
24-May-2019, NaN  
24-May-2019 01:00:00, NaN  
24-May-2019 02:00:00, NaN  
24-May-2019 03:00:00, NaN  
24-May-2019 04:00:00, NaN  
24-May-2019 05:00:00, NaN  
24-May-2019 06:00:00, NaN  
24-May-2019 07:00:00, NaN  
24-May-2019 08:00:00, NaN  
24-May-2019 09:00:00, NaN  
24-May-2019 10:00:00, NaN  
24-May-2019 11:00:00, NaN  
24-May-2019 12:00:00, NaN  
24-May-2019 13:00:00, NaN  
24-May-2019 14:00:00, NaN  
24-May-2019 15:00:00, NaN  
24-May-2019 16:00:00, NaN  
24-May-2019 17:00:00, NaN  
24-May-2019 18:00:00, NaN  
24-May-2019 19:00:00, NaN  
24-May-2019 20:00:00, NaN  
24-May-2019 21:00:00, NaN  
24-May-2019 22:00:00, NaN  
24-May-2019 23:00:00, NaN  
25-May-2019, NaN  
25-May-2019 01:00:00, NaN  
25-May-2019 02:00:00, NaN  
25-May-2019 03:00:00, NaN  
25-May-2019 04:00:00, NaN  
25-May-2019 05:00:00, NaN  
25-May-2019 06:00:00, NaN

25-May-2019 07:00:00, NaN  
25-May-2019 08:00:00, NaN  
25-May-2019 09:00:00, NaN  
25-May-2019 10:00:00, NaN  
25-May-2019 11:00:00, NaN  
25-May-2019 12:00:00, NaN  
25-May-2019 13:00:00, NaN  
25-May-2019 14:00:00, NaN  
25-May-2019 15:00:00, NaN  
25-May-2019 16:00:00, NaN  
25-May-2019 17:00:00, NaN  
25-May-2019 18:00:00, NaN  
25-May-2019 19:00:00, NaN  
25-May-2019 20:00:00, NaN  
25-May-2019 21:00:00, NaN  
25-May-2019 22:00:00, NaN  
25-May-2019 23:00:00, NaN  
26-May-2019, NaN  
26-May-2019 01:00:00, NaN  
26-May-2019 02:00:00, NaN  
26-May-2019 03:00:00, NaN  
26-May-2019 04:00:00, NaN  
26-May-2019 05:00:00, NaN  
26-May-2019 06:00:00, NaN  
26-May-2019 07:00:00, NaN  
26-May-2019 08:00:00, NaN  
26-May-2019 09:00:00, NaN  
26-May-2019 10:00:00, NaN  
26-May-2019 11:00:00, NaN  
26-May-2019 12:00:00, NaN  
26-May-2019 13:00:00, NaN  
26-May-2019 14:00:00, NaN  
26-May-2019 15:00:00, NaN  
26-May-2019 16:00:00, NaN  
26-May-2019 17:00:00, NaN  
26-May-2019 18:00:00, NaN  
26-May-2019 19:00:00, NaN  
26-May-2019 20:00:00, NaN  
26-May-2019 21:00:00, NaN  
26-May-2019 22:00:00, NaN  
26-May-2019 23:00:00, NaN  
27-May-2019, NaN  
27-May-2019 01:00:00, NaN  
27-May-2019 02:00:00, NaN  
27-May-2019 03:00:00, NaN  
27-May-2019 04:00:00, NaN  
27-May-2019 05:00:00, NaN  
27-May-2019 06:00:00, NaN  
27-May-2019 07:00:00, NaN  
27-May-2019 08:00:00, NaN  
27-May-2019 09:00:00, NaN  
27-May-2019 10:00:00, NaN  
27-May-2019 11:00:00, NaN  
27-May-2019 12:00:00, NaN  
27-May-2019 13:00:00, NaN  
27-May-2019 14:00:00, NaN  
27-May-2019 15:00:00, NaN  
27-May-2019 16:00:00, NaN  
27-May-2019 17:00:00, NaN  
27-May-2019 18:00:00, NaN  
27-May-2019 19:00:00, NaN  
27-May-2019 20:00:00, NaN  
27-May-2019 21:00:00, NaN  
27-May-2019 22:00:00, NaN

27-May-2019 23:00:00, NaN  
28-May-2019, NaN  
28-May-2019 01:00:00, NaN  
28-May-2019 02:00:00, NaN  
28-May-2019 03:00:00, NaN  
28-May-2019 04:00:00, NaN  
28-May-2019 05:00:00, NaN  
28-May-2019 06:00:00, NaN  
28-May-2019 07:00:00, NaN  
28-May-2019 08:00:00, NaN  
28-May-2019 09:00:00, NaN  
28-May-2019 10:00:00, NaN  
28-May-2019 11:00:00, NaN  
28-May-2019 12:00:00, NaN  
28-May-2019 13:00:00, NaN  
28-May-2019 14:00:00, NaN  
28-May-2019 15:00:00, NaN  
28-May-2019 16:00:00, NaN  
28-May-2019 17:00:00, NaN  
28-May-2019 18:00:00, NaN  
28-May-2019 19:00:00, NaN  
28-May-2019 20:00:00, NaN  
28-May-2019 21:00:00, NaN  
28-May-2019 22:00:00, NaN  
28-May-2019 23:00:00, NaN  
29-May-2019, NaN  
29-May-2019 01:00:00, NaN  
29-May-2019 02:00:00, NaN  
29-May-2019 03:00:00, NaN  
29-May-2019 04:00:00, NaN  
29-May-2019 05:00:00, NaN  
29-May-2019 06:00:00, NaN  
29-May-2019 07:00:00, NaN  
29-May-2019 08:00:00, NaN  
29-May-2019 09:00:00, NaN  
29-May-2019 10:00:00, NaN  
29-May-2019 11:00:00, NaN  
29-May-2019 12:00:00, NaN  
29-May-2019 13:00:00, NaN  
29-May-2019 14:00:00, NaN  
29-May-2019 15:00:00, NaN  
29-May-2019 16:00:00, NaN  
29-May-2019 17:00:00, NaN  
29-May-2019 18:00:00, NaN  
29-May-2019 19:00:00, NaN  
29-May-2019 20:00:00, NaN  
29-May-2019 21:00:00, NaN  
29-May-2019 22:00:00, NaN  
29-May-2019 23:00:00, NaN  
30-May-2019, NaN  
30-May-2019 01:00:00, NaN  
30-May-2019 02:00:00, NaN  
30-May-2019 03:00:00, NaN  
30-May-2019 04:00:00, NaN  
30-May-2019 05:00:00, NaN  
30-May-2019 06:00:00, NaN  
30-May-2019 07:00:00, NaN  
30-May-2019 08:00:00, NaN  
30-May-2019 09:00:00, NaN  
30-May-2019 10:00:00, NaN  
30-May-2019 11:00:00, NaN  
30-May-2019 12:00:00, NaN  
30-May-2019 13:00:00, NaN  
30-May-2019 14:00:00, NaN

30-May-2019 15:00:00, NaN  
30-May-2019 16:00:00, NaN  
30-May-2019 17:00:00, NaN  
30-May-2019 18:00:00, NaN  
30-May-2019 19:00:00, NaN  
30-May-2019 20:00:00, NaN  
30-May-2019 21:00:00, NaN  
30-May-2019 22:00:00, NaN  
30-May-2019 23:00:00, NaN  
31-May-2019, NaN  
31-May-2019 01:00:00, NaN  
31-May-2019 02:00:00, NaN  
31-May-2019 03:00:00, NaN  
31-May-2019 04:00:00, NaN  
31-May-2019 05:00:00, NaN  
31-May-2019 06:00:00, NaN  
31-May-2019 07:00:00, NaN  
31-May-2019 08:00:00, NaN  
31-May-2019 09:00:00, NaN  
31-May-2019 10:00:00, NaN  
31-May-2019 11:00:00, NaN  
31-May-2019 12:00:00, NaN  
31-May-2019 13:00:00, NaN  
31-May-2019 14:00:00, NaN  
31-May-2019 15:00:00, NaN  
31-May-2019 16:00:00, NaN  
31-May-2019 17:00:00, NaN  
31-May-2019 18:00:00, NaN  
31-May-2019 19:00:00, NaN  
31-May-2019 20:00:00, NaN  
31-May-2019 21:00:00, NaN  
31-May-2019 22:00:00, NaN  
31-May-2019 23:00:00, NaN  
01-Jun-2019, NaN  
01-Jun-2019 01:00:00, NaN  
01-Jun-2019 02:00:00, NaN  
01-Jun-2019 03:00:00, NaN  
01-Jun-2019 04:00:00, NaN  
01-Jun-2019 05:00:00, NaN  
01-Jun-2019 06:00:00, NaN  
01-Jun-2019 07:00:00, NaN  
01-Jun-2019 08:00:00, NaN  
01-Jun-2019 09:00:00, NaN  
01-Jun-2019 10:00:00, NaN  
01-Jun-2019 11:00:00, NaN  
01-Jun-2019 12:00:00, NaN  
01-Jun-2019 13:00:00, NaN  
01-Jun-2019 14:00:00, NaN  
01-Jun-2019 15:00:00, NaN  
01-Jun-2019 16:00:00, NaN  
01-Jun-2019 17:00:00, NaN  
01-Jun-2019 18:00:00, NaN  
01-Jun-2019 19:00:00, NaN  
01-Jun-2019 20:00:00, NaN  
01-Jun-2019 21:00:00, NaN  
01-Jun-2019 22:00:00, NaN  
01-Jun-2019 23:00:00, NaN  
02-Jun-2019, NaN  
02-Jun-2019 01:00:00, NaN  
02-Jun-2019 02:00:00, NaN  
02-Jun-2019 03:00:00, NaN  
02-Jun-2019 04:00:00, NaN  
02-Jun-2019 05:00:00, NaN  
02-Jun-2019 06:00:00, NaN

02-Jun-2019 07:00:00, NaN  
02-Jun-2019 08:00:00, NaN  
02-Jun-2019 09:00:00, NaN  
02-Jun-2019 10:00:00, NaN  
02-Jun-2019 11:00:00, NaN  
02-Jun-2019 12:00:00, NaN  
02-Jun-2019 13:00:00, NaN  
02-Jun-2019 14:00:00, NaN  
02-Jun-2019 15:00:00, NaN  
02-Jun-2019 16:00:00, NaN  
02-Jun-2019 17:00:00, NaN  
02-Jun-2019 18:00:00, NaN  
02-Jun-2019 19:00:00, NaN  
02-Jun-2019 20:00:00, NaN  
02-Jun-2019 21:00:00, NaN  
02-Jun-2019 22:00:00, NaN  
02-Jun-2019 23:00:00, NaN  
03-Jun-2019, NaN  
03-Jun-2019 01:00:00, NaN  
03-Jun-2019 02:00:00, NaN  
03-Jun-2019 03:00:00, NaN  
03-Jun-2019 04:00:00, NaN  
03-Jun-2019 05:00:00, NaN  
03-Jun-2019 06:00:00, NaN  
03-Jun-2019 07:00:00, NaN  
03-Jun-2019 08:00:00, NaN  
03-Jun-2019 09:00:00, NaN  
03-Jun-2019 10:00:00, NaN  
03-Jun-2019 11:00:00, NaN  
03-Jun-2019 12:00:00, NaN  
03-Jun-2019 13:00:00, NaN  
03-Jun-2019 14:00:00, NaN  
03-Jun-2019 15:00:00, NaN  
03-Jun-2019 16:00:00, NaN  
03-Jun-2019 17:00:00, NaN  
03-Jun-2019 18:00:00, NaN  
03-Jun-2019 19:00:00, NaN  
03-Jun-2019 20:00:00, NaN  
03-Jun-2019 21:00:00, NaN  
03-Jun-2019 22:00:00, NaN  
03-Jun-2019 23:00:00, NaN  
04-Jun-2019, NaN  
04-Jun-2019 01:00:00, NaN  
04-Jun-2019 02:00:00, NaN  
04-Jun-2019 03:00:00, NaN  
04-Jun-2019 04:00:00, NaN  
04-Jun-2019 05:00:00, NaN  
04-Jun-2019 06:00:00, NaN  
04-Jun-2019 07:00:00, NaN  
04-Jun-2019 08:00:00, NaN  
04-Jun-2019 09:00:00, NaN  
04-Jun-2019 10:00:00, NaN  
04-Jun-2019 11:00:00, NaN  
04-Jun-2019 12:00:00, NaN  
04-Jun-2019 13:00:00, NaN  
04-Jun-2019 14:00:00, NaN  
04-Jun-2019 15:00:00, NaN  
04-Jun-2019 16:00:00, NaN  
04-Jun-2019 17:00:00, NaN  
04-Jun-2019 18:00:00, NaN  
04-Jun-2019 19:00:00, NaN  
04-Jun-2019 20:00:00, NaN  
04-Jun-2019 21:00:00, NaN  
04-Jun-2019 22:00:00, NaN

04-Jun-2019 23:00:00, NaN  
05-Jun-2019, NaN  
05-Jun-2019 01:00:00, NaN  
05-Jun-2019 02:00:00, NaN  
05-Jun-2019 03:00:00, NaN  
05-Jun-2019 04:00:00, NaN  
05-Jun-2019 05:00:00, NaN  
05-Jun-2019 06:00:00, NaN  
05-Jun-2019 07:00:00, NaN  
05-Jun-2019 08:00:00, NaN  
05-Jun-2019 09:00:00, NaN  
05-Jun-2019 10:00:00, NaN  
05-Jun-2019 11:00:00, NaN  
05-Jun-2019 12:00:00, NaN  
05-Jun-2019 13:00:00, NaN  
05-Jun-2019 14:00:00, NaN  
05-Jun-2019 15:00:00, NaN  
05-Jun-2019 16:00:00, NaN  
05-Jun-2019 17:00:00, NaN  
05-Jun-2019 18:00:00, NaN  
05-Jun-2019 19:00:00, NaN  
05-Jun-2019 20:00:00, NaN  
05-Jun-2019 21:00:00, NaN  
05-Jun-2019 22:00:00, NaN  
05-Jun-2019 23:00:00, NaN  
06-Jun-2019, NaN  
06-Jun-2019 01:00:00, NaN  
06-Jun-2019 02:00:00, NaN  
06-Jun-2019 03:00:00, NaN  
06-Jun-2019 04:00:00, NaN  
06-Jun-2019 05:00:00, NaN  
06-Jun-2019 06:00:00, NaN  
06-Jun-2019 07:00:00, NaN  
06-Jun-2019 08:00:00, NaN  
06-Jun-2019 09:00:00, NaN  
06-Jun-2019 10:00:00, NaN  
06-Jun-2019 11:00:00, NaN  
06-Jun-2019 12:00:00, NaN  
06-Jun-2019 13:00:00, NaN  
06-Jun-2019 14:00:00, NaN  
06-Jun-2019 15:00:00, NaN  
06-Jun-2019 16:00:00, NaN  
06-Jun-2019 17:00:00, NaN  
06-Jun-2019 18:00:00, NaN  
06-Jun-2019 19:00:00, NaN  
06-Jun-2019 20:00:00, NaN  
06-Jun-2019 21:00:00, NaN  
06-Jun-2019 22:00:00, NaN  
06-Jun-2019 23:00:00, NaN  
07-Jun-2019, NaN  
07-Jun-2019 01:00:00, NaN  
07-Jun-2019 02:00:00, NaN  
07-Jun-2019 03:00:00, NaN  
07-Jun-2019 04:00:00, NaN  
07-Jun-2019 05:00:00, NaN  
07-Jun-2019 06:00:00, NaN  
07-Jun-2019 07:00:00, NaN  
07-Jun-2019 08:00:00, NaN  
07-Jun-2019 09:00:00, NaN  
07-Jun-2019 10:00:00, NaN  
07-Jun-2019 11:00:00, NaN  
07-Jun-2019 12:00:00, NaN  
07-Jun-2019 13:00:00, NaN  
07-Jun-2019 14:00:00, NaN

07-Jun-2019 15:00:00, NaN  
07-Jun-2019 16:00:00, NaN  
07-Jun-2019 17:00:00, NaN  
07-Jun-2019 18:00:00, NaN  
07-Jun-2019 19:00:00, NaN  
07-Jun-2019 20:00:00, NaN  
07-Jun-2019 21:00:00, NaN  
07-Jun-2019 22:00:00, NaN  
07-Jun-2019 23:00:00, NaN  
08-Jun-2019, NaN  
08-Jun-2019 01:00:00, NaN  
08-Jun-2019 02:00:00, NaN  
08-Jun-2019 03:00:00, NaN  
08-Jun-2019 04:00:00, NaN  
08-Jun-2019 05:00:00, NaN  
08-Jun-2019 06:00:00, NaN  
08-Jun-2019 07:00:00, NaN  
08-Jun-2019 08:00:00, NaN  
08-Jun-2019 09:00:00, NaN  
08-Jun-2019 10:00:00, NaN  
08-Jun-2019 11:00:00, NaN  
08-Jun-2019 12:00:00, NaN  
08-Jun-2019 13:00:00, NaN  
08-Jun-2019 14:00:00, NaN  
08-Jun-2019 15:00:00, NaN  
08-Jun-2019 16:00:00, NaN  
08-Jun-2019 17:00:00, NaN  
08-Jun-2019 18:00:00, NaN  
08-Jun-2019 19:00:00, NaN  
08-Jun-2019 20:00:00, NaN  
08-Jun-2019 21:00:00, NaN  
08-Jun-2019 22:00:00, NaN  
08-Jun-2019 23:00:00, NaN  
09-Jun-2019, NaN  
09-Jun-2019 01:00:00, NaN  
09-Jun-2019 02:00:00, NaN  
09-Jun-2019 03:00:00, NaN  
09-Jun-2019 04:00:00, NaN  
09-Jun-2019 05:00:00, NaN  
09-Jun-2019 06:00:00, NaN
