# Supplementary material
Source: MDPI journal article supplement (https://www.mdpi.com/2072-4292/12/17/2733)
Supplement: s1 [file s1]

|    | Zone | Cover              | Frequency | Percentage |
|----|------|--------------------|-----------|------------|
| 1  | 1    | Forbs              | 49        | 1.51       |
| 2  | 1    | Forest             | 641       | 19.78      |
| 3  | 1    | Grassland          | 643       | 19.85      |
| 4  | 1    | Lupine dominant    | 314       | 9.69       |
| 5  | 1    | Mixed shrubland    | 120       | 3.70       |
| 6  | 1    | Riparian shrubland | 1398      | 43.15      |
| 7  | 1    | Sagebrush          | 19        | 0.59       |
| 8  | 1    | Unvegetated        | 8         | 0.25       |
| 9  | 1    | Veratrum           | 48        | 1.48       |
| 10 | 2    | Forbs              | 1600      | 26.79      |
| 11 | 2    | Forest             | 200       | 3.35       |
| 12 | 2    | Grassland          | 548       | 9.17       |
| 13 | 2    | Lupine dominant    | 2060      | 34.49      |
| 14 | 2    | Mixed shrubland    | 410       | 6.86       |
| 15 | 2    | Riparian shrubland | 292       | 4.89       |
| 16 | 2    | Sagebrush          | 149       | 2.49       |
| 17 | 2    | Unvegetated        | 26        | 0.43       |
| 18 | 2    | Veratrum           | 688       | 11.52      |
| 19 | 3    | Forbs              | 1261      | 23.07      |
| 20 | 3    | Forest             | 96        | 1.76       |
| 21 | 3    | Grassland          | 789       | 14.44      |
| 22 | 3    | Lupine dominant    | 1215      | 22.23      |
| 23 | 3    | Mixed shrubland    | 533       | 9.75       |
| 24 | 3    | Riparian shrubland | 745       | 13.63      |
| 25 | 3    | Sagebrush          | 614       | 11.24      |
| 26 | 3    | Unvegetated        | 123       | 2.25       |
| 27 | 3    | Veratrum           | 89        | 1.63       |
| 28 | 4    | Forbs              | 175       | 4.14       |
| 29 | 4    | Forest             | 12        | 0.28       |
| 30 | 4    | Grassland          | 507       | 12.00      |
| 31 | 4    | Lupine dominant    | 830       | 19.64      |
| 32 | 4    | Mixed shrubland    | 261       | 6.18       |
| 33 | 4    | Riparian shrubland | 66        | 1.56       |
| 34 | 4    | Sagebrush          | 1219      | 28.85      |
| 35 | 4    | Unvegetated        | 1079      | 25.54      |
| 36 | 4    | Veratrum           | 77        | 1.82       |
| 37 | 5    | Grassland          | 40        | 3.81       |
| 38 | 5    | Lupine dominant    | 4         | 0.38       |
| 39 | 5    | Mixed shrubland    | 5         | 0.48       |
| 40 | 5    | Riparian shrubland | 12        | 1.14       |
| 41 | 5    | Sagebrush          | 5         | 0.48       |
| 42 | 5    | Unvegetated        | 985       | 93.71      |
