# Supplementary material
Source: MDPI journal article supplement (https://www.mdpi.com/2072-4292/12/17/2733)
Supplement: s1 [file s1]

time, VWC  
21-Oct-2016 18:00:00, NaN  
21-Oct-2016 19:00:00, NaN  
21-Oct-2016 20:00:00, NaN  
21-Oct-2016 21:00:00, NaN  
21-Oct-2016 22:00:00, NaN  
21-Oct-2016 23:00:00, NaN  
22-Oct-2016, NaN  
22-Oct-2016 01:00:00, NaN  
22-Oct-2016 02:00:00, NaN  
22-Oct-2016 03:00:00, NaN  
22-Oct-2016 04:00:00, NaN  
22-Oct-2016 05:00:00, NaN  
22-Oct-2016 06:00:00, NaN  
22-Oct-2016 08:00:00, NaN  
22-Oct-2016 09:00:00, NaN  
22-Oct-2016 10:00:00, NaN  
22-Oct-2016 11:00:00, NaN  
22-Oct-2016 12:00:00, NaN  
22-Oct-2016 13:00:00, NaN  
22-Oct-2016 14:00:00, NaN  
22-Oct-2016 15:00:00, NaN  
22-Oct-2016 16:00:00, NaN  
22-Oct-2016 17:00:00, NaN  
22-Oct-2016 18:00:00, NaN  
22-Oct-2016 19:00:00, NaN  
22-Oct-2016 20:00:00, NaN  
22-Oct-2016 21:00:00, NaN  
22-Oct-2016 22:00:00, NaN  
22-Oct-2016 23:00:00, NaN  
23-Oct-2016, NaN  
23-Oct-2016 01:00:00, NaN  
23-Oct-2016 02:00:00, NaN  
23-Oct-2016 03:00:00, NaN  
23-Oct-2016 04:00:00, NaN  
23-Oct-2016 05:00:00, NaN  
23-Oct-2016 06:00:00, NaN  
23-Oct-2016 07:00:00, NaN  
23-Oct-2016 08:00:00, NaN  
23-Oct-2016 09:00:00, NaN  
23-Oct-2016 10:00:00, NaN  
23-Oct-2016 11:00:00, NaN  
23-Oct-2016 12:00:00, NaN  
23-Oct-2016 13:00:00, NaN  
23-Oct-2016 14:00:00, NaN  
23-Oct-2016 15:00:00, NaN  
23-Oct-2016 16:00:00, NaN  
23-Oct-2016 17:00:00, NaN  
23-Oct-2016 18:00:00, NaN  
23-Oct-2016 19:00:00, NaN  
23-Oct-2016 20:00:00, NaN  
23-Oct-2016 21:00:00, NaN  
23-Oct-2016 22:00:00, NaN  
23-Oct-2016 23:00:00, NaN  
24-Oct-2016, NaN  
24-Oct-2016 01:00:00, NaN  
24-Oct-2016 02:00:00, NaN  
24-Oct-2016 03:00:00, NaN  
24-Oct-2016 04:00:00, NaN  
24-Oct-2016 05:00:00, NaN  
24-Oct-2016 06:00:00, NaN  
24-Oct-2016 07:00:00, NaN  
24-Oct-2016 08:00:00, NaN  
24-Oct-2016 09:00:00, NaN

24-Oct-2016 10:00:00, NaN  
24-Oct-2016 11:00:00, NaN  
24-Oct-2016 12:00:00, NaN  
24-Oct-2016 13:00:00, NaN  
24-Oct-2016 14:00:00, NaN  
24-Oct-2016 15:00:00, NaN  
24-Oct-2016 16:00:00, NaN  
24-Oct-2016 17:00:00, NaN  
24-Oct-2016 18:00:00, NaN  
24-Oct-2016 19:00:00, NaN  
24-Oct-2016 20:00:00, NaN  
24-Oct-2016 21:00:00, NaN  
24-Oct-2016 22:00:00, NaN  
24-Oct-2016 23:00:00, NaN  
25-Oct-2016, NaN  
25-Oct-2016 01:00:00, NaN  
25-Oct-2016 02:00:00, NaN  
25-Oct-2016 03:00:00, NaN  
25-Oct-2016 04:00:00, NaN  
25-Oct-2016 05:00:00, NaN  
25-Oct-2016 06:00:00, NaN  
25-Oct-2016 07:00:00, NaN  
25-Oct-2016 08:00:00, NaN  
25-Oct-2016 09:00:00, NaN  
25-Oct-2016 10:00:00, NaN  
25-Oct-2016 11:00:00, NaN  
25-Oct-2016 12:00:00, NaN  
25-Oct-2016 13:00:00, NaN  
25-Oct-2016 14:00:00, NaN  
25-Oct-2016 15:00:00, NaN  
25-Oct-2016 16:00:00, NaN  
25-Oct-2016 17:00:00, NaN  
25-Oct-2016 18:00:00, NaN  
25-Oct-2016 19:00:00, NaN  
25-Oct-2016 20:00:00, NaN  
25-Oct-2016 21:00:00, NaN  
25-Oct-2016 22:00:00, NaN  
25-Oct-2016 23:00:00, NaN  
26-Oct-2016, NaN  
26-Oct-2016 01:00:00, NaN  
26-Oct-2016 02:00:00, NaN  
26-Oct-2016 03:00:00, NaN  
26-Oct-2016 04:00:00, NaN  
26-Oct-2016 05:00:00, NaN  
26-Oct-2016 06:00:00, NaN  
26-Oct-2016 07:00:00, NaN  
26-Oct-2016 08:00:00, NaN  
26-Oct-2016 09:00:00, NaN  
26-Oct-2016 10:00:00, NaN  
26-Oct-2016 11:00:00, NaN  
26-Oct-2016 12:00:00, NaN  
26-Oct-2016 13:00:00, NaN  
26-Oct-2016 14:00:00, NaN  
26-Oct-2016 15:00:00, NaN  
26-Oct-2016 16:00:00, NaN  
26-Oct-2016 17:00:00, NaN  
26-Oct-2016 18:00:00, NaN  
26-Oct-2016 19:00:00, NaN  
26-Oct-2016 20:00:00, NaN  
26-Oct-2016 21:00:00, NaN  
26-Oct-2016 22:00:00, NaN  
26-Oct-2016 23:00:00, NaN  
27-Oct-2016, NaN  
27-Oct-2016 01:00:00, NaN

27-Oct-2016 02:00:00, NaN  
27-Oct-2016 03:00:00, NaN  
27-Oct-2016 04:00:00, NaN  
27-Oct-2016 05:00:00, NaN  
27-Oct-2016 06:00:00, NaN  
27-Oct-2016 07:00:00, NaN  
27-Oct-2016 08:00:00, NaN  
27-Oct-2016 09:00:00, NaN  
27-Oct-2016 10:00:00, NaN  
27-Oct-2016 11:00:00, NaN  
27-Oct-2016 12:00:00, NaN  
27-Oct-2016 13:00:00, NaN  
27-Oct-2016 14:00:00, NaN  
27-Oct-2016 15:00:00, NaN  
27-Oct-2016 16:00:00, NaN  
27-Oct-2016 17:00:00, NaN  
27-Oct-2016 18:00:00, NaN  
27-Oct-2016 19:00:00, NaN  
27-Oct-2016 20:00:00, NaN  
27-Oct-2016 21:00:00, NaN  
27-Oct-2016 22:00:00, NaN  
27-Oct-2016 23:00:00, NaN  
28-Oct-2016, NaN  
28-Oct-2016 01:00:00, NaN  
28-Oct-2016 02:00:00, NaN  
28-Oct-2016 03:00:00, NaN  
28-Oct-2016 04:00:00, NaN  
28-Oct-2016 05:00:00, NaN  
28-Oct-2016 06:00:00, NaN  
28-Oct-2016 07:00:00, NaN  
28-Oct-2016 08:00:00, NaN  
28-Oct-2016 09:00:00, NaN  
28-Oct-2016 10:00:00, NaN  
28-Oct-2016 11:00:00, NaN  
28-Oct-2016 12:00:00, NaN  
28-Oct-2016 13:00:00, NaN  
28-Oct-2016 14:00:00, NaN  
28-Oct-2016 15:00:00, NaN  
28-Oct-2016 16:00:00, NaN  
28-Oct-2016 17:00:00, NaN  
28-Oct-2016 18:00:00, NaN  
28-Oct-2016 19:00:00, NaN  
28-Oct-2016 20:00:00, NaN  
28-Oct-2016 21:00:00, NaN  
28-Oct-2016 22:00:00, NaN  
28-Oct-2016 23:00:00, NaN  
29-Oct-2016, NaN  
29-Oct-2016 01:00:00, NaN  
29-Oct-2016 02:00:00, NaN  
29-Oct-2016 03:00:00, NaN  
29-Oct-2016 04:00:00, NaN  
29-Oct-2016 05:00:00, NaN  
29-Oct-2016 06:00:00, NaN  
29-Oct-2016 07:00:00, NaN  
29-Oct-2016 08:00:00, NaN  
29-Oct-2016 09:00:00, NaN  
29-Oct-2016 10:00:00, NaN  
29-Oct-2016 11:00:00, NaN  
29-Oct-2016 12:00:00, NaN  
29-Oct-2016 13:00:00, NaN  
29-Oct-2016 14:00:00, NaN  
29-Oct-2016 15:00:00, NaN  
29-Oct-2016 16:00:00, NaN  
29-Oct-2016 17:00:00, NaN

|              |           |     |
|--------------|-----------|-----|
| 29-Oct-2016  | 18:00:00, | NaN |
| 29-Oct-2016  | 19:00:00, | NaN |
| 29-Oct-2016  | 20:00:00, | NaN |
| 29-Oct-2016  | 21:00:00, | NaN |
| 29-Oct-2016  | 22:00:00, | NaN |
| 29-Oct-2016  | 23:00:00, | NaN |
| 30-Oct-2016, | NaN       |     |
| 30-Oct-2016  | 01:00:00, | NaN |
| 30-Oct-2016  | 02:00:00, | NaN |
| 30-Oct-2016  | 03:00:00, | NaN |
| 30-Oct-2016  | 04:00:00, | NaN |
| 30-Oct-2016  | 05:00:00, | NaN |
| 30-Oct-2016  | 06:00:00, | NaN |
| 30-Oct-2016  | 07:00:00, | NaN |
| 30-Oct-2016  | 08:00:00, | NaN |
| 30-Oct-2016  | 09:00:00, | NaN |
| 30-Oct-2016  | 10:00:00, | NaN |
| 30-Oct-2016  | 11:00:00, | NaN |
| 30-Oct-2016  | 12:00:00, | NaN |
| 30-Oct-2016  | 13:00:00, | NaN |
| 30-Oct-2016  | 14:00:00, | NaN |
| 30-Oct-2016  | 15:00:00, | NaN |
| 30-Oct-2016  | 16:00:00, | NaN |
| 30-Oct-2016  | 17:00:00, | NaN |
| 30-Oct-2016  | 18:00:00, | NaN |
| 30-Oct-2016  | 19:00:00, | NaN |
| 30-Oct-2016  | 20:00:00, | NaN |
| 30-Oct-2016  | 21:00:00, | NaN |
| 30-Oct-2016  | 22:00:00, | NaN |
| 30-Oct-2016  | 23:00:00, | NaN |
| 31-Oct-2016, | NaN       |     |
| 31-Oct-2016  | 01:00:00, | NaN |
| 31-Oct-2016  | 02:00:00, | NaN |
| 31-Oct-2016  | 03:00:00, | NaN |
| 31-Oct-2016  | 04:00:00, | NaN |
| 31-Oct-2016  | 05:00:00, | NaN |
| 31-Oct-2016  | 06:00:00, | NaN |
| 31-Oct-2016  | 07:00:00, | NaN |
| 31-Oct-2016  | 08:00:00, | NaN |
| 31-Oct-2016  | 09:00:00, | NaN |
| 31-Oct-2016  | 10:00:00, | NaN |
| 31-Oct-2016  | 11:00:00, | NaN |
| 31-Oct-2016  | 12:00:00, | NaN |
| 31-Oct-2016  | 13:00:00, | NaN |
| 31-Oct-2016  | 14:00:00, | NaN |
| 31-Oct-2016  | 15:00:00, | NaN |
| 31-Oct-2016  | 16:00:00, | NaN |
| 31-Oct-2016  | 17:00:00, | NaN |
| 31-Oct-2016  | 18:00:00, | NaN |
| 31-Oct-2016  | 19:00:00, | NaN |
| 31-Oct-2016  | 20:00:00, | NaN |
| 31-Oct-2016  | 21:00:00, | NaN |
| 31-Oct-2016  | 22:00:00, | NaN |
| 31-Oct-2016  | 23:00:00, | NaN |
| 01-Nov-2016, | NaN       |     |
| 01-Nov-2016  | 01:00:00, | NaN |
| 01-Nov-2016  | 02:00:00, | NaN |
| 01-Nov-2016  | 03:00:00, | NaN |
| 01-Nov-2016  | 04:00:00, | NaN |
| 01-Nov-2016  | 05:00:00, | NaN |
| 01-Nov-2016  | 06:00:00, | NaN |
| 01-Nov-2016  | 07:00:00, | NaN |
| 01-Nov-2016  | 08:00:00, | NaN |
| 01-Nov-2016  | 09:00:00, | NaN |

|              |           |     |
|--------------|-----------|-----|
| 01-Nov-2016  | 10:00:00, | NaN |
| 01-Nov-2016  | 11:00:00, | NaN |
| 01-Nov-2016  | 12:00:00, | NaN |
| 01-Nov-2016  | 13:00:00, | NaN |
| 01-Nov-2016  | 14:00:00, | NaN |
| 01-Nov-2016  | 15:00:00, | NaN |
| 01-Nov-2016  | 16:00:00, | NaN |
| 01-Nov-2016  | 17:00:00, | NaN |
| 01-Nov-2016  | 18:00:00, | NaN |
| 01-Nov-2016  | 19:00:00, | NaN |
| 01-Nov-2016  | 20:00:00, | NaN |
| 01-Nov-2016  | 21:00:00, | NaN |
| 01-Nov-2016  | 22:00:00, | NaN |
| 01-Nov-2016  | 23:00:00, | NaN |
| 02-Nov-2016, |           | NaN |
| 02-Nov-2016  | 01:00:00, | NaN |
| 02-Nov-2016  | 02:00:00, | NaN |
| 02-Nov-2016  | 03:00:00, | NaN |
| 02-Nov-2016  | 04:00:00, | NaN |
| 02-Nov-2016  | 05:00:00, | NaN |
| 02-Nov-2016  | 06:00:00, | NaN |
| 02-Nov-2016  | 07:00:00, | NaN |
| 02-Nov-2016  | 08:00:00, | NaN |
| 02-Nov-2016  | 09:00:00, | NaN |
| 02-Nov-2016  | 10:00:00, | NaN |
| 02-Nov-2016  | 11:00:00, | NaN |
| 02-Nov-2016  | 12:00:00, | NaN |
| 02-Nov-2016  | 13:00:00, | NaN |
| 02-Nov-2016  | 14:00:00, | NaN |
| 02-Nov-2016  | 15:00:00, | NaN |
| 02-Nov-2016  | 16:00:00, | NaN |
| 02-Nov-2016  | 17:00:00, | NaN |
| 02-Nov-2016  | 18:00:00, | NaN |
| 02-Nov-2016  | 19:00:00, | NaN |
| 02-Nov-2016  | 20:00:00, | NaN |
| 02-Nov-2016  | 21:00:00, | NaN |
| 02-Nov-2016  | 22:00:00, | NaN |
| 02-Nov-2016  | 23:00:00, | NaN |
| 03-Nov-2016, |           | NaN |
| 03-Nov-2016  | 01:00:00, | NaN |
| 03-Nov-2016  | 02:00:00, | NaN |
| 03-Nov-2016  | 03:00:00, | NaN |
| 03-Nov-2016  | 04:00:00, | NaN |
| 03-Nov-2016  | 05:00:00, | NaN |
| 03-Nov-2016  | 06:00:00, | NaN |
| 03-Nov-2016  | 07:00:00, | NaN |
| 03-Nov-2016  | 08:00:00, | NaN |
| 03-Nov-2016  | 09:00:00, | NaN |
| 03-Nov-2016  | 10:00:00, | NaN |
| 03-Nov-2016  | 11:00:00, | NaN |
| 03-Nov-2016  | 12:00:00, | NaN |
| 03-Nov-2016  | 13:00:00, | NaN |
| 03-Nov-2016  | 14:00:00, | NaN |
| 03-Nov-2016  | 15:00:00, | NaN |
| 03-Nov-2016  | 16:00:00, | NaN |
| 03-Nov-2016  | 17:00:00, | NaN |
| 03-Nov-2016  | 18:00:00, | NaN |
| 03-Nov-2016  | 19:00:00, | NaN |
| 03-Nov-2016  | 20:00:00, | NaN |
| 03-Nov-2016  | 21:00:00, | NaN |
| 03-Nov-2016  | 22:00:00, | NaN |
| 03-Nov-2016  | 23:00:00, | NaN |
| 04-Nov-2016, |           | NaN |
| 04-Nov-2016  | 01:00:00, | NaN |

|              |           |     |
|--------------|-----------|-----|
| 04-Nov-2016  | 02:00:00, | NaN |
| 04-Nov-2016  | 03:00:00, | NaN |
| 04-Nov-2016  | 04:00:00, | NaN |
| 04-Nov-2016  | 05:00:00, | NaN |
| 04-Nov-2016  | 06:00:00, | NaN |
| 04-Nov-2016  | 07:00:00, | NaN |
| 04-Nov-2016  | 08:00:00, | NaN |
| 04-Nov-2016  | 09:00:00, | NaN |
| 04-Nov-2016  | 10:00:00, | NaN |
| 04-Nov-2016  | 11:00:00, | NaN |
| 04-Nov-2016  | 12:00:00, | NaN |
| 04-Nov-2016  | 13:00:00, | NaN |
| 04-Nov-2016  | 14:00:00, | NaN |
| 04-Nov-2016  | 15:00:00, | NaN |
| 04-Nov-2016  | 16:00:00, | NaN |
| 04-Nov-2016  | 17:00:00, | NaN |
| 04-Nov-2016  | 18:00:00, | NaN |
| 04-Nov-2016  | 19:00:00, | NaN |
| 04-Nov-2016  | 20:00:00, | NaN |
| 04-Nov-2016  | 21:00:00, | NaN |
| 04-Nov-2016  | 22:00:00, | NaN |
| 04-Nov-2016  | 23:00:00, | NaN |
| 05-Nov-2016, | NaN       |     |
| 05-Nov-2016  | 01:00:00, | NaN |
| 05-Nov-2016  | 02:00:00, | NaN |
| 05-Nov-2016  | 03:00:00, | NaN |
| 05-Nov-2016  | 04:00:00, | NaN |
| 05-Nov-2016  | 05:00:00, | NaN |
| 05-Nov-2016  | 06:00:00, | NaN |
| 05-Nov-2016  | 07:00:00, | NaN |
| 05-Nov-2016  | 08:00:00, | NaN |
| 05-Nov-2016  | 09:00:00, | NaN |
| 05-Nov-2016  | 10:00:00, | NaN |
| 05-Nov-2016  | 11:00:00, | NaN |
| 05-Nov-2016  | 12:00:00, | NaN |
| 05-Nov-2016  | 13:00:00, | NaN |
| 05-Nov-2016  | 14:00:00, | NaN |
| 05-Nov-2016  | 15:00:00, | NaN |
| 05-Nov-2016  | 16:00:00, | NaN |
| 05-Nov-2016  | 17:00:00, | NaN |
| 05-Nov-2016  | 18:00:00, | NaN |
| 05-Nov-2016  | 19:00:00, | NaN |
| 05-Nov-2016  | 20:00:00, | NaN |
| 05-Nov-2016  | 21:00:00, | NaN |
| 05-Nov-2016  | 22:00:00, | NaN |
| 05-Nov-2016  | 23:00:00, | NaN |
| 06-Nov-2016, | NaN       |     |
| 06-Nov-2016  | 01:00:00, | NaN |
| 06-Nov-2016  | 02:00:00, | NaN |
| 06-Nov-2016  | 03:00:00, | NaN |
| 06-Nov-2016  | 04:00:00, | NaN |
| 06-Nov-2016  | 05:00:00, | NaN |
| 06-Nov-2016  | 06:00:00, | NaN |
| 06-Nov-2016  | 07:00:00, | NaN |
| 06-Nov-2016  | 08:00:00, | NaN |
| 06-Nov-2016  | 09:00:00, | NaN |
| 06-Nov-2016  | 10:00:00, | NaN |
| 06-Nov-2016  | 11:00:00, | NaN |
| 06-Nov-2016  | 12:00:00, | NaN |
| 06-Nov-2016  | 13:00:00, | NaN |
| 06-Nov-2016  | 14:00:00, | NaN |
| 06-Nov-2016  | 15:00:00, | NaN |
| 06-Nov-2016  | 16:00:00, | NaN |
| 06-Nov-2016  | 17:00:00, | NaN |

|              |           |     |
|--------------|-----------|-----|
| 06-Nov-2016  | 18:00:00, | NaN |
| 06-Nov-2016  | 19:00:00, | NaN |
| 06-Nov-2016  | 20:00:00, | NaN |
| 06-Nov-2016  | 21:00:00, | NaN |
| 06-Nov-2016  | 22:00:00, | NaN |
| 06-Nov-2016  | 23:00:00, | NaN |
| 07-Nov-2016, | NaN       |     |
| 07-Nov-2016  | 01:00:00, | NaN |
| 07-Nov-2016  | 02:00:00, | NaN |
| 07-Nov-2016  | 03:00:00, | NaN |
| 07-Nov-2016  | 04:00:00, | NaN |
| 07-Nov-2016  | 05:00:00, | NaN |
| 07-Nov-2016  | 06:00:00, | NaN |
| 07-Nov-2016  | 07:00:00, | NaN |
| 07-Nov-2016  | 08:00:00, | NaN |
| 07-Nov-2016  | 09:00:00, | NaN |
| 07-Nov-2016  | 10:00:00, | NaN |
| 07-Nov-2016  | 11:00:00, | NaN |
| 07-Nov-2016  | 12:00:00, | NaN |
| 07-Nov-2016  | 13:00:00, | NaN |
| 07-Nov-2016  | 14:00:00, | NaN |
| 07-Nov-2016  | 15:00:00, | NaN |
| 07-Nov-2016  | 16:00:00, | NaN |
| 07-Nov-2016  | 17:00:00, | NaN |
| 07-Nov-2016  | 18:00:00, | NaN |
| 07-Nov-2016  | 19:00:00, | NaN |
| 07-Nov-2016  | 20:00:00, | NaN |
| 07-Nov-2016  | 21:00:00, | NaN |
| 07-Nov-2016  | 22:00:00, | NaN |
| 07-Nov-2016  | 23:00:00, | NaN |
| 08-Nov-2016, | NaN       |     |
| 08-Nov-2016  | 01:00:00, | NaN |
| 08-Nov-2016  | 02:00:00, | NaN |
| 08-Nov-2016  | 03:00:00, | NaN |
| 08-Nov-2016  | 04:00:00, | NaN |
| 08-Nov-2016  | 05:00:00, | NaN |
| 08-Nov-2016  | 06:00:00, | NaN |
| 08-Nov-2016  | 07:00:00, | NaN |
| 08-Nov-2016  | 08:00:00, | NaN |
| 08-Nov-2016  | 09:00:00, | NaN |
| 08-Nov-2016  | 10:00:00, | NaN |
| 08-Nov-2016  | 11:00:00, | NaN |
| 08-Nov-2016  | 12:00:00, | NaN |
| 08-Nov-2016  | 13:00:00, | NaN |
| 08-Nov-2016  | 14:00:00, | NaN |
| 08-Nov-2016  | 15:00:00, | NaN |
| 08-Nov-2016  | 16:00:00, | NaN |
| 08-Nov-2016  | 17:00:00, | NaN |
| 08-Nov-2016  | 18:00:00, | NaN |
| 08-Nov-2016  | 19:00:00, | NaN |
| 08-Nov-2016  | 20:00:00, | NaN |
| 08-Nov-2016  | 21:00:00, | NaN |
| 08-Nov-2016  | 22:00:00, | NaN |
| 08-Nov-2016  | 23:00:00, | NaN |
| 09-Nov-2016, | NaN       |     |
| 09-Nov-2016  | 01:00:00, | NaN |
| 09-Nov-2016  | 02:00:00, | NaN |
| 09-Nov-2016  | 03:00:00, | NaN |
| 09-Nov-2016  | 04:00:00, | NaN |
| 09-Nov-2016  | 05:00:00, | NaN |
| 09-Nov-2016  | 06:00:00, | NaN |
| 09-Nov-2016  | 07:00:00, | NaN |
| 09-Nov-2016  | 08:00:00, | NaN |
| 09-Nov-2016  | 09:00:00, | NaN |

09-Nov-2016 10:00:00, NaN  
09-Nov-2016 11:00:00, NaN  
09-Nov-2016 12:00:00, NaN  
09-Nov-2016 13:00:00, NaN  
09-Nov-2016 14:00:00, NaN  
09-Nov-2016 15:00:00, NaN  
09-Nov-2016 16:00:00, NaN  
09-Nov-2016 17:00:00, NaN  
09-Nov-2016 18:00:00, NaN  
09-Nov-2016 19:00:00, NaN  
09-Nov-2016 20:00:00, NaN  
09-Nov-2016 21:00:00, NaN  
09-Nov-2016 22:00:00, NaN  
09-Nov-2016 23:00:00, NaN  
10-Nov-2016, NaN  
10-Nov-2016 01:00:00, NaN  
10-Nov-2016 02:00:00, NaN  
10-Nov-2016 03:00:00, NaN  
10-Nov-2016 04:00:00, NaN  
10-Nov-2016 05:00:00, NaN  
10-Nov-2016 06:00:00, NaN  
10-Nov-2016 07:00:00, NaN  
10-Nov-2016 08:00:00, NaN  
10-Nov-2016 09:00:00, NaN  
10-Nov-2016 10:00:00, NaN  
10-Nov-2016 11:00:00, NaN  
10-Nov-2016 12:00:00, NaN  
10-Nov-2016 13:00:00, NaN  
10-Nov-2016 14:00:00, NaN  
10-Nov-2016 15:00:00, NaN  
10-Nov-2016 16:00:00, NaN  
10-Nov-2016 17:00:00, NaN  
10-Nov-2016 18:00:00, NaN  
10-Nov-2016 19:00:00, NaN  
10-Nov-2016 20:00:00, NaN  
10-Nov-2016 21:00:00, NaN  
10-Nov-2016 22:00:00, NaN  
10-Nov-2016 23:00:00, NaN  
11-Nov-2016, NaN  
11-Nov-2016 01:00:00, NaN  
11-Nov-2016 02:00:00, NaN  
11-Nov-2016 03:00:00, NaN  
11-Nov-2016 04:00:00, NaN  
11-Nov-2016 05:00:00, NaN  
11-Nov-2016 06:00:00, NaN  
11-Nov-2016 07:00:00, NaN  
11-Nov-2016 08:00:00, NaN  
11-Nov-2016 09:00:00, NaN  
11-Nov-2016 10:00:00, NaN  
11-Nov-2016 11:00:00, NaN  
11-Nov-2016 12:00:00, NaN  
11-Nov-2016 13:00:00, NaN  
11-Nov-2016 14:00:00, NaN  
11-Nov-2016 15:00:00, NaN  
11-Nov-2016 16:00:00, NaN  
11-Nov-2016 17:00:00, NaN  
11-Nov-2016 18:00:00, NaN  
11-Nov-2016 19:00:00, NaN  
11-Nov-2016 20:00:00, NaN  
11-Nov-2016 21:00:00, NaN  
11-Nov-2016 22:00:00, NaN  
11-Nov-2016 23:00:00, NaN  
12-Nov-2016, NaN  
12-Nov-2016 01:00:00, NaN



|              |           |     |
|--------------|-----------|-----|
| 12-Nov-2016  | 02:00:00, | NaN |
| 12-Nov-2016  | 03:00:00, | NaN |
| 12-Nov-2016  | 04:00:00, | NaN |
| 12-Nov-2016  | 05:00:00, | NaN |
| 12-Nov-2016  | 06:00:00, | NaN |
| 12-Nov-2016  | 07:00:00, | NaN |
| 12-Nov-2016  | 08:00:00, | NaN |
| 12-Nov-2016  | 09:00:00, | NaN |
| 12-Nov-2016  | 10:00:00, | NaN |
| 12-Nov-2016  | 11:00:00, | NaN |
| 12-Nov-2016  | 12:00:00, | NaN |
| 12-Nov-2016  | 13:00:00, | NaN |
| 12-Nov-2016  | 14:00:00, | NaN |
| 12-Nov-2016  | 15:00:00, | NaN |
| 12-Nov-2016  | 16:00:00, | NaN |
| 12-Nov-2016  | 17:00:00, | NaN |
| 12-Nov-2016  | 18:00:00, | NaN |
| 12-Nov-2016  | 19:00:00, | NaN |
| 12-Nov-2016  | 20:00:00, | NaN |
| 12-Nov-2016  | 21:00:00, | NaN |
| 12-Nov-2016  | 22:00:00, | NaN |
| 12-Nov-2016  | 23:00:00, | NaN |
| 13-Nov-2016, | NaN       |     |
| 13-Nov-2016  | 01:00:00, | NaN |
| 13-Nov-2016  | 02:00:00, | NaN |
| 13-Nov-2016  | 03:00:00, | NaN |
| 13-Nov-2016  | 04:00:00, | NaN |
| 13-Nov-2016  | 05:00:00, | NaN |
| 13-Nov-2016  | 06:00:00, | NaN |
| 13-Nov-2016  | 07:00:00, | NaN |
| 13-Nov-2016  | 08:00:00, | NaN |
| 13-Nov-2016  | 09:00:00, | NaN |
| 13-Nov-2016  | 10:00:00, | NaN |
| 13-Nov-2016  | 11:00:00, | NaN |
| 13-Nov-2016  | 12:00:00, | NaN |
| 13-Nov-2016  | 13:00:00, | NaN |
| 13-Nov-2016  | 14:00:00, | NaN |
| 13-Nov-2016  | 15:00:00, | NaN |
| 13-Nov-2016  | 16:00:00, | NaN |
| 13-Nov-2016  | 17:00:00, | NaN |
| 13-Nov-2016  | 18:00:00, | NaN |
| 13-Nov-2016  | 19:00:00, | NaN |
| 13-Nov-2016  | 20:00:00, | NaN |
| 13-Nov-2016  | 21:00:00, | NaN |
| 13-Nov-2016  | 22:00:00, | NaN |
| 13-Nov-2016  | 23:00:00, | NaN |
| 14-Nov-2016, | NaN       |     |
| 14-Nov-2016  | 01:00:00, | NaN |
| 14-Nov-2016  | 02:00:00, | NaN |
| 14-Nov-2016  | 03:00:00, | NaN |
| 14-Nov-2016  | 04:00:00, | NaN |
| 14-Nov-2016  | 05:00:00, | NaN |
| 14-Nov-2016  | 06:00:00, | NaN |
| 14-Nov-2016  | 07:00:00, | NaN |
| 14-Nov-2016  | 08:00:00, | NaN |
| 14-Nov-2016  | 09:00:00, | NaN |
| 14-Nov-2016  | 10:00:00, | NaN |
| 14-Nov-2016  | 11:00:00, | NaN |
| 14-Nov-2016  | 12:00:00, | NaN |
| 14-Nov-2016  | 13:00:00, | NaN |
| 14-Nov-2016  | 14:00:00, | NaN |
| 14-Nov-2016  | 15:00:00, | NaN |
| 14-Nov-2016  | 16:00:00, | NaN |
| 14-Nov-2016  | 17:00:00, | NaN |

|              |           |     |
|--------------|-----------|-----|
| 14-Nov-2016  | 18:00:00, | NaN |
| 14-Nov-2016  | 19:00:00, | NaN |
| 14-Nov-2016  | 20:00:00, | NaN |
| 14-Nov-2016  | 21:00:00, | NaN |
| 14-Nov-2016  | 22:00:00, | NaN |
| 14-Nov-2016  | 23:00:00, | NaN |
| 15-Nov-2016, | NaN       |     |
| 15-Nov-2016  | 01:00:00, | NaN |
| 15-Nov-2016  | 02:00:00, | NaN |
| 15-Nov-2016  | 03:00:00, | NaN |
| 15-Nov-2016  | 04:00:00, | NaN |
| 15-Nov-2016  | 05:00:00, | NaN |
| 15-Nov-2016  | 06:00:00, | NaN |
| 15-Nov-2016  | 07:00:00, | NaN |
| 15-Nov-2016  | 08:00:00, | NaN |
| 15-Nov-2016  | 09:00:00, | NaN |
| 15-Nov-2016  | 10:00:00, | NaN |
| 15-Nov-2016  | 11:00:00, | NaN |
| 15-Nov-2016  | 12:00:00, | NaN |
| 15-Nov-2016  | 13:00:00, | NaN |
| 15-Nov-2016  | 14:00:00, | NaN |
| 15-Nov-2016  | 15:00:00, | NaN |
| 15-Nov-2016  | 16:00:00, | NaN |
| 15-Nov-2016  | 17:00:00, | NaN |
| 15-Nov-2016  | 18:00:00, | NaN |
| 15-Nov-2016  | 19:00:00, | NaN |
| 15-Nov-2016  | 20:00:00, | NaN |
| 15-Nov-2016  | 21:00:00, | NaN |
| 15-Nov-2016  | 22:00:00, | NaN |
| 15-Nov-2016  | 23:00:00, | NaN |
| 16-Nov-2016, | NaN       |     |
| 16-Nov-2016  | 01:00:00, | NaN |
| 16-Nov-2016  | 02:00:00, | NaN |
| 16-Nov-2016  | 03:00:00, | NaN |
| 16-Nov-2016  | 04:00:00, | NaN |
| 16-Nov-2016  | 05:00:00, | NaN |
| 16-Nov-2016  | 06:00:00, | NaN |
| 16-Nov-2016  | 07:00:00, | NaN |
| 16-Nov-2016  | 08:00:00, | NaN |
| 16-Nov-2016  | 09:00:00, | NaN |
| 16-Nov-2016  | 10:00:00, | NaN |
| 16-Nov-2016  | 11:00:00, | NaN |
| 16-Nov-2016  | 12:00:00, | NaN |
| 16-Nov-2016  | 13:00:00, | NaN |
| 16-Nov-2016  | 14:00:00, | NaN |
| 16-Nov-2016  | 15:00:00, | NaN |
| 16-Nov-2016  | 16:00:00, | NaN |
| 16-Nov-2016  | 17:00:00, | NaN |
| 16-Nov-2016  | 18:00:00, | NaN |
| 16-Nov-2016  | 19:00:00, | NaN |
| 16-Nov-2016  | 20:00:00, | NaN |
| 16-Nov-2016  | 21:00:00, | NaN |
| 16-Nov-2016  | 22:00:00, | NaN |
| 16-Nov-2016  | 23:00:00, | NaN |
| 17-Nov-2016, | NaN       |     |
| 17-Nov-2016  | 01:00:00, | NaN |
| 17-Nov-2016  | 02:00:00, | NaN |
| 17-Nov-2016  | 03:00:00, | NaN |
| 17-Nov-2016  | 04:00:00, | NaN |
| 17-Nov-2016  | 05:00:00, | NaN |
| 17-Nov-2016  | 06:00:00, | NaN |
| 17-Nov-2016  | 07:00:00, | NaN |
| 17-Nov-2016  | 08:00:00, | NaN |
| 17-Nov-2016  | 09:00:00, | NaN |

17-Nov-2016 10:00:00, NaN  
17-Nov-2016 11:00:00, NaN  
17-Nov-2016 12:00:00, NaN  
17-Nov-2016 13:00:00, NaN  
17-Nov-2016 14:00:00, NaN  
17-Nov-2016 15:00:00, NaN  
17-Nov-2016 16:00:00, NaN  
17-Nov-2016 17:00:00, NaN  
17-Nov-2016 18:00:00, NaN  
17-Nov-2016 19:00:00, NaN  
17-Nov-2016 20:00:00, NaN  
17-Nov-2016 21:00:00, NaN  
17-Nov-2016 22:00:00, NaN  
17-Nov-2016 23:00:00, NaN  
18-Nov-2016, NaN  
18-Nov-2016 01:00:00, NaN  
18-Nov-2016 02:00:00, NaN  
18-Nov-2016 03:00:00, NaN  
18-Nov-2016 04:00:00, NaN  
18-Nov-2016 05:00:00, NaN  
18-Nov-2016 06:00:00, NaN  
18-Nov-2016 07:00:00, NaN  
18-Nov-2016 08:00:00, NaN  
18-Nov-2016 09:00:00, NaN  
18-Nov-2016 10:00:00, NaN  
18-Nov-2016 11:00:00, NaN  
18-Nov-2016 12:00:00, NaN  
18-Nov-2016 13:00:00, NaN  
18-Nov-2016 14:00:00, NaN  
18-Nov-2016 15:00:00, NaN  
18-Nov-2016 16:00:00, NaN  
18-Nov-2016 17:00:00, NaN  
18-Nov-2016 18:00:00, NaN  
18-Nov-2016 19:00:00, NaN  
18-Nov-2016 20:00:00, NaN  
18-Nov-2016 21:00:00, NaN  
18-Nov-2016 22:00:00, NaN  
18-Nov-2016 23:00:00, NaN  
19-Nov-2016, NaN  
19-Nov-2016 01:00:00, NaN  
19-Nov-2016 02:00:00, NaN  
19-Nov-2016 03:00:00, NaN  
19-Nov-2016 04:00:00, NaN  
19-Nov-2016 05:00:00, NaN  
19-Nov-2016 06:00:00, NaN  
19-Nov-2016 07:00:00, NaN  
19-Nov-2016 08:00:00, NaN  
19-Nov-2016 09:00:00, NaN  
19-Nov-2016 10:00:00, NaN  
19-Nov-2016 11:00:00, NaN  
19-Nov-2016 12:00:00, NaN  
19-Nov-2016 13:00:00, NaN  
19-Nov-2016 14:00:00, NaN  
19-Nov-2016 15:00:00, NaN  
19-Nov-2016 16:00:00, NaN  
19-Nov-2016 17:00:00, NaN  
19-Nov-2016 18:00:00, NaN  
19-Nov-2016 19:00:00, NaN  
19-Nov-2016 20:00:00, NaN  
19-Nov-2016 21:00:00, NaN  
19-Nov-2016 22:00:00, NaN  
19-Nov-2016 23:00:00, NaN  
20-Nov-2016, NaN  
20-Nov-2016 01:00:00, NaN

|              |           |     |
|--------------|-----------|-----|
| 20-Nov-2016  | 02:00:00, | NaN |
| 20-Nov-2016  | 03:00:00, | NaN |
| 20-Nov-2016  | 04:00:00, | NaN |
| 20-Nov-2016  | 05:00:00, | NaN |
| 20-Nov-2016  | 06:00:00, | NaN |
| 20-Nov-2016  | 07:00:00, | NaN |
| 20-Nov-2016  | 08:00:00, | NaN |
| 20-Nov-2016  | 09:00:00, | NaN |
| 20-Nov-2016  | 10:00:00, | NaN |
| 20-Nov-2016  | 11:00:00, | NaN |
| 20-Nov-2016  | 12:00:00, | NaN |
| 20-Nov-2016  | 13:00:00, | NaN |
| 20-Nov-2016  | 14:00:00, | NaN |
| 20-Nov-2016  | 15:00:00, | NaN |
| 20-Nov-2016  | 16:00:00, | NaN |
| 20-Nov-2016  | 17:00:00, | NaN |
| 20-Nov-2016  | 18:00:00, | NaN |
| 20-Nov-2016  | 19:00:00, | NaN |
| 20-Nov-2016  | 20:00:00, | NaN |
| 20-Nov-2016  | 21:00:00, | NaN |
| 20-Nov-2016  | 22:00:00, | NaN |
| 20-Nov-2016  | 23:00:00, | NaN |
| 21-Nov-2016, | NaN       |     |
| 21-Nov-2016  | 01:00:00, | NaN |
| 21-Nov-2016  | 02:00:00, | NaN |
| 21-Nov-2016  | 03:00:00, | NaN |
| 21-Nov-2016  | 04:00:00, | NaN |
| 21-Nov-2016  | 05:00:00, | NaN |
| 21-Nov-2016  | 06:00:00, | NaN |
| 21-Nov-2016  | 07:00:00, | NaN |
| 21-Nov-2016  | 08:00:00, | NaN |
| 21-Nov-2016  | 09:00:00, | NaN |
| 21-Nov-2016  | 10:00:00, | NaN |
| 21-Nov-2016  | 11:00:00, | NaN |
| 21-Nov-2016  | 12:00:00, | NaN |
| 21-Nov-2016  | 13:00:00, | NaN |
| 21-Nov-2016  | 14:00:00, | NaN |
| 21-Nov-2016  | 15:00:00, | NaN |
| 21-Nov-2016  | 16:00:00, | NaN |
| 21-Nov-2016  | 17:00:00, | NaN |
| 21-Nov-2016  | 18:00:00, | NaN |
| 21-Nov-2016  | 19:00:00, | NaN |
| 21-Nov-2016  | 20:00:00, | NaN |
| 21-Nov-2016  | 21:00:00, | NaN |
| 21-Nov-2016  | 22:00:00, | NaN |
| 21-Nov-2016  | 23:00:00, | NaN |
| 22-Nov-2016, | NaN       |     |
| 22-Nov-2016  | 01:00:00, | NaN |
| 22-Nov-2016  | 02:00:00, | NaN |
| 22-Nov-2016  | 03:00:00, | NaN |
| 22-Nov-2016  | 04:00:00, | NaN |
| 22-Nov-2016  | 05:00:00, | NaN |
| 22-Nov-2016  | 06:00:00, | NaN |
| 22-Nov-2016  | 07:00:00, | NaN |
| 22-Nov-2016  | 08:00:00, | NaN |
| 22-Nov-2016  | 09:00:00, | NaN |
| 22-Nov-2016  | 10:00:00, | NaN |
| 22-Nov-2016  | 11:00:00, | NaN |
| 22-Nov-2016  | 12:00:00, | NaN |
| 22-Nov-2016  | 13:00:00, | NaN |
| 22-Nov-2016  | 14:00:00, | NaN |
| 22-Nov-2016  | 15:00:00, | NaN |
| 22-Nov-2016  | 16:00:00, | NaN |
| 22-Nov-2016  | 17:00:00, | NaN |

|              |           |     |
|--------------|-----------|-----|
| 22-Nov-2016  | 18:00:00, | NaN |
| 22-Nov-2016  | 19:00:00, | NaN |
| 22-Nov-2016  | 20:00:00, | NaN |
| 22-Nov-2016  | 21:00:00, | NaN |
| 22-Nov-2016  | 22:00:00, | NaN |
| 22-Nov-2016  | 23:00:00, | NaN |
| 23-Nov-2016, | NaN       |     |
| 23-Nov-2016  | 01:00:00, | NaN |
| 23-Nov-2016  | 02:00:00, | NaN |
| 23-Nov-2016  | 03:00:00, | NaN |
| 23-Nov-2016  | 04:00:00, | NaN |
| 23-Nov-2016  | 05:00:00, | NaN |
| 23-Nov-2016  | 06:00:00, | NaN |
| 23-Nov-2016  | 07:00:00, | NaN |
| 23-Nov-2016  | 08:00:00, | NaN |
| 23-Nov-2016  | 09:00:00, | NaN |
| 23-Nov-2016  | 10:00:00, | NaN |
| 23-Nov-2016  | 11:00:00, | NaN |
| 23-Nov-2016  | 12:00:00, | NaN |
| 23-Nov-2016  | 13:00:00, | NaN |
| 23-Nov-2016  | 14:00:00, | NaN |
| 23-Nov-2016  | 15:00:00, | NaN |
| 23-Nov-2016  | 16:00:00, | NaN |
| 23-Nov-2016  | 17:00:00, | NaN |
| 23-Nov-2016  | 18:00:00, | NaN |
| 23-Nov-2016  | 19:00:00, | NaN |
| 23-Nov-2016  | 20:00:00, | NaN |
| 23-Nov-2016  | 21:00:00, | NaN |
| 23-Nov-2016  | 22:00:00, | NaN |
| 23-Nov-2016  | 23:00:00, | NaN |
| 24-Nov-2016, | NaN       |     |
| 24-Nov-2016  | 01:00:00, | NaN |
| 24-Nov-2016  | 02:00:00, | NaN |
| 24-Nov-2016  | 03:00:00, | NaN |
| 24-Nov-2016  | 04:00:00, | NaN |
| 24-Nov-2016  | 05:00:00, | NaN |
| 24-Nov-2016  | 06:00:00, | NaN |
| 24-Nov-2016  | 07:00:00, | NaN |
| 24-Nov-2016  | 08:00:00, | NaN |
| 24-Nov-2016  | 09:00:00, | NaN |
| 24-Nov-2016  | 10:00:00, | NaN |
| 24-Nov-2016  | 11:00:00, | NaN |
| 24-Nov-2016  | 12:00:00, | NaN |
| 24-Nov-2016  | 13:00:00, | NaN |
| 24-Nov-2016  | 14:00:00, | NaN |
| 24-Nov-2016  | 15:00:00, | NaN |
| 24-Nov-2016  | 16:00:00, | NaN |
| 24-Nov-2016  | 17:00:00, | NaN |
| 24-Nov-2016  | 18:00:00, | NaN |
| 24-Nov-2016  | 19:00:00, | NaN |
| 24-Nov-2016  | 20:00:00, | NaN |
| 24-Nov-2016  | 21:00:00, | NaN |
| 24-Nov-2016  | 22:00:00, | NaN |
| 24-Nov-2016  | 23:00:00, | NaN |
| 25-Nov-2016, | NaN       |     |
| 25-Nov-2016  | 01:00:00, | NaN |
| 25-Nov-2016  | 02:00:00, | NaN |
| 25-Nov-2016  | 03:00:00, | NaN |
| 25-Nov-2016  | 04:00:00, | NaN |
| 25-Nov-2016  | 05:00:00, | NaN |
| 25-Nov-2016  | 06:00:00, | NaN |
| 25-Nov-2016  | 07:00:00, | NaN |
| 25-Nov-2016  | 08:00:00, | NaN |
| 25-Nov-2016  | 09:00:00, | NaN |

25-Nov-2016 10:00:00, NaN  
25-Nov-2016 11:00:00, NaN  
25-Nov-2016 12:00:00, NaN  
25-Nov-2016 13:00:00, NaN  
25-Nov-2016 14:00:00, NaN  
25-Nov-2016 15:00:00, NaN  
25-Nov-2016 16:00:00, NaN  
25-Nov-2016 17:00:00, NaN  
25-Nov-2016 18:00:00, NaN  
25-Nov-2016 19:00:00, NaN  
25-Nov-2016 20:00:00, NaN  
25-Nov-2016 21:00:00, NaN  
25-Nov-2016 22:00:00, NaN  
25-Nov-2016 23:00:00, NaN  
26-Nov-2016, NaN  
26-Nov-2016 01:00:00, NaN  
26-Nov-2016 02:00:00, NaN  
26-Nov-2016 03:00:00, NaN  
26-Nov-2016 04:00:00, NaN  
26-Nov-2016 05:00:00, NaN  
26-Nov-2016 06:00:00, NaN  
26-Nov-2016 07:00:00, NaN  
26-Nov-2016 08:00:00, NaN  
26-Nov-2016 09:00:00, NaN  
26-Nov-2016 10:00:00, NaN  
26-Nov-2016 11:00:00, NaN  
26-Nov-2016 12:00:00, NaN  
26-Nov-2016 13:00:00, NaN  
26-Nov-2016 14:00:00, NaN  
26-Nov-2016 15:00:00, NaN  
26-Nov-2016 16:00:00, NaN  
26-Nov-2016 17:00:00, NaN  
26-Nov-2016 18:00:00, NaN  
26-Nov-2016 19:00:00, NaN  
26-Nov-2016 20:00:00, NaN  
26-Nov-2016 21:00:00, NaN  
26-Nov-2016 22:00:00, NaN  
26-Nov-2016 23:00:00, NaN  
27-Nov-2016, NaN  
27-Nov-2016 01:00:00, NaN  
27-Nov-2016 02:00:00, NaN  
27-Nov-2016 03:00:00, NaN  
27-Nov-2016 04:00:00, NaN  
27-Nov-2016 05:00:00, NaN  
27-Nov-2016 06:00:00, NaN  
27-Nov-2016 07:00:00, NaN  
27-Nov-2016 08:00:00, NaN  
27-Nov-2016 09:00:00, NaN  
27-Nov-2016 10:00:00, NaN  
27-Nov-2016 11:00:00, NaN  
27-Nov-2016 12:00:00, NaN  
27-Nov-2016 13:00:00, NaN  
27-Nov-2016 14:00:00, NaN  
27-Nov-2016 15:00:00, NaN  
27-Nov-2016 16:00:00, NaN  
27-Nov-2016 17:00:00, NaN  
27-Nov-2016 18:00:00, NaN  
27-Nov-2016 19:00:00, NaN  
27-Nov-2016 20:00:00, NaN  
27-Nov-2016 21:00:00, NaN  
27-Nov-2016 22:00:00, NaN  
27-Nov-2016 23:00:00, NaN  
28-Nov-2016, NaN  
28-Nov-2016 01:00:00, NaN

|              |           |     |
|--------------|-----------|-----|
| 28-Nov-2016  | 02:00:00, | NaN |
| 28-Nov-2016  | 03:00:00, | NaN |
| 28-Nov-2016  | 04:00:00, | NaN |
| 28-Nov-2016  | 05:00:00, | NaN |
| 28-Nov-2016  | 06:00:00, | NaN |
| 28-Nov-2016  | 07:00:00, | NaN |
| 28-Nov-2016  | 08:00:00, | NaN |
| 28-Nov-2016  | 09:00:00, | NaN |
| 28-Nov-2016  | 10:00:00, | NaN |
| 28-Nov-2016  | 11:00:00, | NaN |
| 28-Nov-2016  | 12:00:00, | NaN |
| 28-Nov-2016  | 13:00:00, | NaN |
| 28-Nov-2016  | 14:00:00, | NaN |
| 28-Nov-2016  | 15:00:00, | NaN |
| 28-Nov-2016  | 16:00:00, | NaN |
| 28-Nov-2016  | 17:00:00, | NaN |
| 28-Nov-2016  | 18:00:00, | NaN |
| 28-Nov-2016  | 19:00:00, | NaN |
| 28-Nov-2016  | 20:00:00, | NaN |
| 28-Nov-2016  | 21:00:00, | NaN |
| 28-Nov-2016  | 22:00:00, | NaN |
| 28-Nov-2016  | 23:00:00, | NaN |
| 29-Nov-2016, | NaN       |     |
| 29-Nov-2016  | 01:00:00, | NaN |
| 29-Nov-2016  | 02:00:00, | NaN |
| 29-Nov-2016  | 03:00:00, | NaN |
| 29-Nov-2016  | 04:00:00, | NaN |
| 29-Nov-2016  | 05:00:00, | NaN |
| 29-Nov-2016  | 06:00:00, | NaN |
| 29-Nov-2016  | 07:00:00, | NaN |
| 29-Nov-2016  | 08:00:00, | NaN |
| 29-Nov-2016  | 09:00:00, | NaN |
| 29-Nov-2016  | 10:00:00, | NaN |
| 29-Nov-2016  | 11:00:00, | NaN |
| 29-Nov-2016  | 12:00:00, | NaN |
| 29-Nov-2016  | 13:00:00, | NaN |
| 29-Nov-2016  | 14:00:00, | NaN |
| 29-Nov-2016  | 15:00:00, | NaN |
| 29-Nov-2016  | 16:00:00, | NaN |
| 29-Nov-2016  | 17:00:00, | NaN |
| 29-Nov-2016  | 18:00:00, | NaN |
| 29-Nov-2016  | 19:00:00, | NaN |
| 29-Nov-2016  | 20:00:00, | NaN |
| 29-Nov-2016  | 21:00:00, | NaN |
| 29-Nov-2016  | 22:00:00, | NaN |
| 29-Nov-2016  | 23:00:00, | NaN |
| 30-Nov-2016, | NaN       |     |
| 30-Nov-2016  | 01:00:00, | NaN |
| 30-Nov-2016  | 02:00:00, | NaN |
| 30-Nov-2016  | 03:00:00, | NaN |
| 30-Nov-2016  | 04:00:00, | NaN |
| 30-Nov-2016  | 05:00:00, | NaN |
| 30-Nov-2016  | 06:00:00, | NaN |
| 30-Nov-2016  | 07:00:00, | NaN |
| 30-Nov-2016  | 08:00:00, | NaN |
| 30-Nov-2016  | 09:00:00, | NaN |
| 30-Nov-2016  | 10:00:00, | NaN |
| 30-Nov-2016  | 11:00:00, | NaN |
| 30-Nov-2016  | 12:00:00, | NaN |
| 30-Nov-2016  | 13:00:00, | NaN |
| 30-Nov-2016  | 14:00:00, | NaN |
| 30-Nov-2016  | 15:00:00, | NaN |
| 30-Nov-2016  | 16:00:00, | NaN |
| 30-Nov-2016  | 17:00:00, | NaN |

|              |           |     |
|--------------|-----------|-----|
| 30-Nov-2016  | 18:00:00, | NaN |
| 30-Nov-2016  | 19:00:00, | NaN |
| 30-Nov-2016  | 20:00:00, | NaN |
| 30-Nov-2016  | 21:00:00, | NaN |
| 30-Nov-2016  | 22:00:00, | NaN |
| 30-Nov-2016  | 23:00:00, | NaN |
| 01-Dec-2016, | NaN       |     |
| 01-Dec-2016  | 01:00:00, | NaN |
| 01-Dec-2016  | 02:00:00, | NaN |
| 01-Dec-2016  | 03:00:00, | NaN |
| 01-Dec-2016  | 04:00:00, | NaN |
| 01-Dec-2016  | 05:00:00, | NaN |
| 01-Dec-2016  | 06:00:00, | NaN |
| 01-Dec-2016  | 07:00:00, | NaN |
| 01-Dec-2016  | 08:00:00, | NaN |
| 01-Dec-2016  | 09:00:00, | NaN |
| 01-Dec-2016  | 10:00:00, | NaN |
| 01-Dec-2016  | 11:00:00, | NaN |
| 01-Dec-2016  | 12:00:00, | NaN |
| 01-Dec-2016  | 13:00:00, | NaN |
| 01-Dec-2016  | 14:00:00, | NaN |
| 01-Dec-2016  | 15:00:00, | NaN |
| 01-Dec-2016  | 16:00:00, | NaN |
| 01-Dec-2016  | 17:00:00, | NaN |
| 01-Dec-2016  | 18:00:00, | NaN |
| 01-Dec-2016  | 19:00:00, | NaN |
| 01-Dec-2016  | 20:00:00, | NaN |
| 01-Dec-2016  | 21:00:00, | NaN |
| 01-Dec-2016  | 22:00:00, | NaN |
| 01-Dec-2016  | 23:00:00, | NaN |
| 02-Dec-2016, | NaN       |     |
| 02-Dec-2016  | 01:00:00, | NaN |
| 02-Dec-2016  | 02:00:00, | NaN |
| 02-Dec-2016  | 03:00:00, | NaN |
| 02-Dec-2016  | 04:00:00, | NaN |
| 02-Dec-2016  | 05:00:00, | NaN |
| 02-Dec-2016  | 06:00:00, | NaN |
| 02-Dec-2016  | 07:00:00, | NaN |
| 02-Dec-2016  | 08:00:00, | NaN |
| 02-Dec-2016  | 09:00:00, | NaN |
| 02-Dec-2016  | 10:00:00, | NaN |
| 02-Dec-2016  | 11:00:00, | NaN |
| 02-Dec-2016  | 12:00:00, | NaN |
| 02-Dec-2016  | 13:00:00, | NaN |
| 02-Dec-2016  | 14:00:00, | NaN |
| 02-Dec-2016  | 15:00:00, | NaN |
| 02-Dec-2016  | 16:00:00, | NaN |
| 02-Dec-2016  | 17:00:00, | NaN |
| 02-Dec-2016  | 18:00:00, | NaN |
| 02-Dec-2016  | 19:00:00, | NaN |
| 02-Dec-2016  | 20:00:00, | NaN |
| 02-Dec-2016  | 21:00:00, | NaN |
| 02-Dec-2016  | 22:00:00, | NaN |
| 02-Dec-2016  | 23:00:00, | NaN |
| 03-Dec-2016, | NaN       |     |
| 03-Dec-2016  | 01:00:00, | NaN |
| 03-Dec-2016  | 02:00:00, | NaN |
| 03-Dec-2016  | 03:00:00, | NaN |
| 03-Dec-2016  | 04:00:00, | NaN |
| 03-Dec-2016  | 05:00:00, | NaN |
| 03-Dec-2016  | 06:00:00, | NaN |
| 03-Dec-2016  | 07:00:00, | NaN |
| 03-Dec-2016  | 08:00:00, | NaN |
| 03-Dec-2016  | 09:00:00, | NaN |



03-Dec-2016 10:00:00, NaN  
03-Dec-2016 11:00:00, NaN  
03-Dec-2016 12:00:00, NaN  
03-Dec-2016 13:00:00, NaN  
03-Dec-2016 14:00:00, NaN  
03-Dec-2016 15:00:00, NaN  
03-Dec-2016 16:00:00, NaN  
03-Dec-2016 17:00:00, NaN  
03-Dec-2016 18:00:00, NaN  
03-Dec-2016 19:00:00, NaN  
03-Dec-2016 20:00:00, NaN  
03-Dec-2016 21:00:00, NaN  
03-Dec-2016 22:00:00, NaN  
03-Dec-2016 23:00:00, NaN  
04-Dec-2016, NaN  
04-Dec-2016 01:00:00, NaN  
04-Dec-2016 02:00:00, NaN  
04-Dec-2016 03:00:00, NaN  
04-Dec-2016 04:00:00, NaN  
04-Dec-2016 05:00:00, NaN  
04-Dec-2016 06:00:00, NaN  
04-Dec-2016 07:00:00, NaN  
04-Dec-2016 08:00:00, NaN  
04-Dec-2016 09:00:00, NaN  
04-Dec-2016 10:00:00, NaN  
04-Dec-2016 11:00:00, NaN  
04-Dec-2016 12:00:00, NaN  
04-Dec-2016 13:00:00, NaN  
04-Dec-2016 14:00:00, NaN  
04-Dec-2016 15:00:00, NaN  
04-Dec-2016 16:00:00, NaN  
04-Dec-2016 17:00:00, NaN  
04-Dec-2016 18:00:00, NaN  
04-Dec-2016 19:00:00, NaN  
04-Dec-2016 20:00:00, NaN  
04-Dec-2016 21:00:00, NaN  
04-Dec-2016 22:00:00, NaN  
04-Dec-2016 23:00:00, NaN  
05-Dec-2016, NaN  
05-Dec-2016 01:00:00, NaN  
05-Dec-2016 02:00:00, NaN  
05-Dec-2016 03:00:00, NaN  
05-Dec-2016 04:00:00, NaN  
05-Dec-2016 05:00:00, NaN  
05-Dec-2016 06:00:00, NaN  
05-Dec-2016 07:00:00, NaN  
05-Dec-2016 08:00:00, NaN  
05-Dec-2016 09:00:00, NaN  
05-Dec-2016 10:00:00, NaN  
05-Dec-2016 11:00:00, NaN  
05-Dec-2016 12:00:00, NaN  
05-Dec-2016 13:00:00, NaN  
05-Dec-2016 14:00:00, NaN  
05-Dec-2016 15:00:00, NaN  
05-Dec-2016 16:00:00, NaN  
05-Dec-2016 17:00:00, NaN  
05-Dec-2016 18:00:00, NaN  
05-Dec-2016 19:00:00, NaN  
05-Dec-2016 20:00:00, NaN  
05-Dec-2016 21:00:00, NaN  
05-Dec-2016 22:00:00, NaN  
05-Dec-2016 23:00:00, NaN  
06-Dec-2016, NaN  
06-Dec-2016 01:00:00, NaN

06-Dec-2016 02:00:00, NaN  
06-Dec-2016 03:00:00, NaN  
06-Dec-2016 04:00:00, NaN  
06-Dec-2016 05:00:00, NaN  
06-Dec-2016 06:00:00, NaN  
06-Dec-2016 07:00:00, NaN  
06-Dec-2016 08:00:00, NaN  
06-Dec-2016 09:00:00, NaN  
06-Dec-2016 10:00:00, NaN  
06-Dec-2016 11:00:00, NaN  
06-Dec-2016 12:00:00, NaN  
06-Dec-2016 13:00:00, NaN  
06-Dec-2016 14:00:00, NaN  
06-Dec-2016 15:00:00, NaN  
06-Dec-2016 16:00:00, NaN  
06-Dec-2016 17:00:00, NaN  
06-Dec-2016 18:00:00, NaN  
06-Dec-2016 19:00:00, NaN  
06-Dec-2016 20:00:00, NaN  
06-Dec-2016 21:00:00, NaN  
06-Dec-2016 22:00:00, NaN  
06-Dec-2016 23:00:00, NaN  
07-Dec-2016, NaN  
07-Dec-2016 01:00:00, NaN  
07-Dec-2016 02:00:00, NaN  
07-Dec-2016 03:00:00, NaN  
07-Dec-2016 04:00:00, NaN  
07-Dec-2016 05:00:00, NaN  
07-Dec-2016 06:00:00, NaN  
07-Dec-2016 07:00:00, NaN  
07-Dec-2016 08:00:00, NaN  
07-Dec-2016 09:00:00, NaN  
07-Dec-2016 10:00:00, NaN  
07-Dec-2016 11:00:00, NaN  
07-Dec-2016 12:00:00, NaN  
07-Dec-2016 13:00:00, NaN  
07-Dec-2016 14:00:00, NaN  
07-Dec-2016 15:00:00, NaN  
07-Dec-2016 16:00:00, NaN  
07-Dec-2016 17:00:00, NaN  
07-Dec-2016 18:00:00, NaN  
07-Dec-2016 19:00:00, NaN  
07-Dec-2016 20:00:00, NaN  
07-Dec-2016 21:00:00, NaN  
07-Dec-2016 22:00:00, NaN  
07-Dec-2016 23:00:00, NaN  
08-Dec-2016, NaN  
08-Dec-2016 01:00:00, NaN  
08-Dec-2016 02:00:00, NaN  
08-Dec-2016 03:00:00, NaN  
08-Dec-2016 04:00:00, NaN  
08-Dec-2016 05:00:00, NaN  
08-Dec-2016 06:00:00, NaN  
08-Dec-2016 07:00:00, NaN  
08-Dec-2016 08:00:00, NaN  
08-Dec-2016 09:00:00, NaN  
08-Dec-2016 10:00:00, NaN  
08-Dec-2016 11:00:00, NaN  
08-Dec-2016 12:00:00, NaN  
08-Dec-2016 13:00:00, NaN  
08-Dec-2016 14:00:00, NaN  
08-Dec-2016 15:00:00, NaN  
08-Dec-2016 16:00:00, NaN  
08-Dec-2016 17:00:00, NaN

|              |           |     |
|--------------|-----------|-----|
| 08-Dec-2016  | 18:00:00, | NaN |
| 08-Dec-2016  | 19:00:00, | NaN |
| 08-Dec-2016  | 20:00:00, | NaN |
| 08-Dec-2016  | 21:00:00, | NaN |
| 08-Dec-2016  | 22:00:00, | NaN |
| 08-Dec-2016  | 23:00:00, | NaN |
| 09-Dec-2016, | NaN       |     |
| 09-Dec-2016  | 01:00:00, | NaN |
| 09-Dec-2016  | 02:00:00, | NaN |
| 09-Dec-2016  | 03:00:00, | NaN |
| 09-Dec-2016  | 04:00:00, | NaN |
| 09-Dec-2016  | 05:00:00, | NaN |
| 09-Dec-2016  | 06:00:00, | NaN |
| 09-Dec-2016  | 07:00:00, | NaN |
| 09-Dec-2016  | 08:00:00, | NaN |
| 09-Dec-2016  | 09:00:00, | NaN |
| 09-Dec-2016  | 10:00:00, | NaN |
| 09-Dec-2016  | 11:00:00, | NaN |
| 09-Dec-2016  | 12:00:00, | NaN |
| 09-Dec-2016  | 13:00:00, | NaN |
| 09-Dec-2016  | 14:00:00, | NaN |
| 09-Dec-2016  | 15:00:00, | NaN |
| 09-Dec-2016  | 16:00:00, | NaN |
| 09-Dec-2016  | 17:00:00, | NaN |
| 09-Dec-2016  | 18:00:00, | NaN |
| 09-Dec-2016  | 19:00:00, | NaN |
| 09-Dec-2016  | 20:00:00, | NaN |
| 09-Dec-2016  | 21:00:00, | NaN |
| 09-Dec-2016  | 22:00:00, | NaN |
| 09-Dec-2016  | 23:00:00, | NaN |
| 10-Dec-2016, | NaN       |     |
| 10-Dec-2016  | 01:00:00, | NaN |
| 10-Dec-2016  | 02:00:00, | NaN |
| 10-Dec-2016  | 03:00:00, | NaN |
| 10-Dec-2016  | 04:00:00, | NaN |
| 10-Dec-2016  | 05:00:00, | NaN |
| 10-Dec-2016  | 06:00:00, | NaN |
| 10-Dec-2016  | 07:00:00, | NaN |
| 10-Dec-2016  | 08:00:00, | NaN |
| 10-Dec-2016  | 09:00:00, | NaN |
| 10-Dec-2016  | 10:00:00, | NaN |
| 10-Dec-2016  | 11:00:00, | NaN |
| 10-Dec-2016  | 12:00:00, | NaN |
| 10-Dec-2016  | 13:00:00, | NaN |
| 10-Dec-2016  | 14:00:00, | NaN |
| 10-Dec-2016  | 15:00:00, | NaN |
| 10-Dec-2016  | 16:00:00, | NaN |
| 10-Dec-2016  | 17:00:00, | NaN |
| 10-Dec-2016  | 18:00:00, | NaN |
| 10-Dec-2016  | 19:00:00, | NaN |
| 10-Dec-2016  | 20:00:00, | NaN |
| 10-Dec-2016  | 21:00:00, | NaN |
| 10-Dec-2016  | 22:00:00, | NaN |
| 10-Dec-2016  | 23:00:00, | NaN |
| 11-Dec-2016, | NaN       |     |
| 11-Dec-2016  | 01:00:00, | NaN |
| 11-Dec-2016  | 02:00:00, | NaN |
| 11-Dec-2016  | 03:00:00, | NaN |
| 11-Dec-2016  | 04:00:00, | NaN |
| 11-Dec-2016  | 05:00:00, | NaN |
| 11-Dec-2016  | 06:00:00, | NaN |
| 11-Dec-2016  | 07:00:00, | NaN |
| 11-Dec-2016  | 08:00:00, | NaN |
| 11-Dec-2016  | 09:00:00, | NaN |

11-Dec-2016 10:00:00, NaN  
11-Dec-2016 11:00:00, NaN  
11-Dec-2016 12:00:00, NaN  
11-Dec-2016 13:00:00, NaN  
11-Dec-2016 14:00:00, NaN  
11-Dec-2016 15:00:00, NaN  
11-Dec-2016 16:00:00, NaN  
11-Dec-2016 17:00:00, NaN  
11-Dec-2016 18:00:00, NaN  
11-Dec-2016 19:00:00, NaN  
11-Dec-2016 20:00:00, NaN  
11-Dec-2016 21:00:00, NaN  
11-Dec-2016 22:00:00, NaN  
11-Dec-2016 23:00:00, NaN  
12-Dec-2016, NaN  
12-Dec-2016 01:00:00, NaN  
12-Dec-2016 02:00:00, NaN  
12-Dec-2016 03:00:00, NaN  
12-Dec-2016 04:00:00, NaN  
12-Dec-2016 05:00:00, NaN  
12-Dec-2016 06:00:00, NaN  
12-Dec-2016 07:00:00, NaN  
12-Dec-2016 08:00:00, NaN  
12-Dec-2016 09:00:00, NaN  
12-Dec-2016 10:00:00, NaN  
12-Dec-2016 11:00:00, NaN  
12-Dec-2016 12:00:00, NaN  
12-Dec-2016 13:00:00, NaN  
12-Dec-2016 14:00:00, NaN  
12-Dec-2016 15:00:00, NaN  
12-Dec-2016 16:00:00, NaN  
12-Dec-2016 17:00:00, NaN  
12-Dec-2016 18:00:00, NaN  
12-Dec-2016 19:00:00, NaN  
12-Dec-2016 20:00:00, NaN  
12-Dec-2016 21:00:00, NaN  
12-Dec-2016 22:00:00, NaN  
12-Dec-2016 23:00:00, NaN  
13-Dec-2016, NaN  
13-Dec-2016 01:00:00, NaN  
13-Dec-2016 02:00:00, NaN  
13-Dec-2016 03:00:00, NaN  
13-Dec-2016 04:00:00, NaN  
13-Dec-2016 05:00:00, NaN  
13-Dec-2016 06:00:00, NaN  
13-Dec-2016 07:00:00, NaN  
13-Dec-2016 08:00:00, NaN  
13-Dec-2016 09:00:00, NaN  
13-Dec-2016 10:00:00, NaN  
13-Dec-2016 11:00:00, NaN  
13-Dec-2016 12:00:00, NaN  
13-Dec-2016 13:00:00, NaN  
13-Dec-2016 14:00:00, NaN  
13-Dec-2016 15:00:00, NaN  
13-Dec-2016 16:00:00, NaN  
13-Dec-2016 17:00:00, NaN  
13-Dec-2016 18:00:00, NaN  
13-Dec-2016 19:00:00, NaN  
13-Dec-2016 20:00:00, NaN  
13-Dec-2016 21:00:00, NaN  
13-Dec-2016 22:00:00, NaN  
13-Dec-2016 23:00:00, NaN  
14-Dec-2016, NaN  
14-Dec-2016 01:00:00, NaN

|              |           |     |
|--------------|-----------|-----|
| 14-Dec-2016  | 02:00:00, | NaN |
| 14-Dec-2016  | 03:00:00, | NaN |
| 14-Dec-2016  | 04:00:00, | NaN |
| 14-Dec-2016  | 05:00:00, | NaN |
| 14-Dec-2016  | 06:00:00, | NaN |
| 14-Dec-2016  | 07:00:00, | NaN |
| 14-Dec-2016  | 08:00:00, | NaN |
| 14-Dec-2016  | 09:00:00, | NaN |
| 14-Dec-2016  | 10:00:00, | NaN |
| 14-Dec-2016  | 11:00:00, | NaN |
| 14-Dec-2016  | 12:00:00, | NaN |
| 14-Dec-2016  | 13:00:00, | NaN |
| 14-Dec-2016  | 14:00:00, | NaN |
| 14-Dec-2016  | 15:00:00, | NaN |
| 14-Dec-2016  | 16:00:00, | NaN |
| 14-Dec-2016  | 17:00:00, | NaN |
| 14-Dec-2016  | 18:00:00, | NaN |
| 14-Dec-2016  | 19:00:00, | NaN |
| 14-Dec-2016  | 20:00:00, | NaN |
| 14-Dec-2016  | 21:00:00, | NaN |
| 14-Dec-2016  | 22:00:00, | NaN |
| 14-Dec-2016  | 23:00:00, | NaN |
| 15-Dec-2016, | NaN       |     |
| 15-Dec-2016  | 01:00:00, | NaN |
| 15-Dec-2016  | 02:00:00, | NaN |
| 15-Dec-2016  | 03:00:00, | NaN |
| 15-Dec-2016  | 04:00:00, | NaN |
| 15-Dec-2016  | 05:00:00, | NaN |
| 15-Dec-2016  | 06:00:00, | NaN |
| 15-Dec-2016  | 07:00:00, | NaN |
| 15-Dec-2016  | 08:00:00, | NaN |
| 15-Dec-2016  | 09:00:00, | NaN |
| 15-Dec-2016  | 10:00:00, | NaN |
| 15-Dec-2016  | 11:00:00, | NaN |
| 15-Dec-2016  | 12:00:00, | NaN |
| 15-Dec-2016  | 13:00:00, | NaN |
| 15-Dec-2016  | 14:00:00, | NaN |
| 15-Dec-2016  | 15:00:00, | NaN |
| 15-Dec-2016  | 16:00:00, | NaN |
| 15-Dec-2016  | 17:00:00, | NaN |
| 15-Dec-2016  | 18:00:00, | NaN |
| 15-Dec-2016  | 19:00:00, | NaN |
| 15-Dec-2016  | 20:00:00, | NaN |
| 15-Dec-2016  | 21:00:00, | NaN |
| 15-Dec-2016  | 22:00:00, | NaN |
| 15-Dec-2016  | 23:00:00, | NaN |
| 16-Dec-2016, | NaN       |     |
| 16-Dec-2016  | 01:00:00, | NaN |
| 16-Dec-2016  | 02:00:00, | NaN |
| 16-Dec-2016  | 03:00:00, | NaN |
| 16-Dec-2016  | 04:00:00, | NaN |
| 16-Dec-2016  | 05:00:00, | NaN |
| 16-Dec-2016  | 06:00:00, | NaN |
| 16-Dec-2016  | 07:00:00, | NaN |
| 16-Dec-2016  | 08:00:00, | NaN |
| 16-Dec-2016  | 09:00:00, | NaN |
| 16-Dec-2016  | 10:00:00, | NaN |
| 16-Dec-2016  | 11:00:00, | NaN |
| 16-Dec-2016  | 12:00:00, | NaN |
| 16-Dec-2016  | 13:00:00, | NaN |
| 16-Dec-2016  | 14:00:00, | NaN |
| 16-Dec-2016  | 15:00:00, | NaN |
| 16-Dec-2016  | 16:00:00, | NaN |
| 16-Dec-2016  | 17:00:00, | NaN |

16-Dec-2016 18:00:00, NaN  
16-Dec-2016 19:00:00, NaN  
16-Dec-2016 20:00:00, NaN  
16-Dec-2016 21:00:00, NaN  
16-Dec-2016 22:00:00, NaN  
16-Dec-2016 23:00:00, NaN  
17-Dec-2016, NaN  
17-Dec-2016 01:00:00, NaN  
17-Dec-2016 02:00:00, NaN  
17-Dec-2016 03:00:00, NaN  
17-Dec-2016 04:00:00, NaN  
17-Dec-2016 05:00:00, NaN  
17-Dec-2016 06:00:00, NaN  
17-Dec-2016 07:00:00, NaN  
17-Dec-2016 08:00:00, NaN  
17-Dec-2016 09:00:00, NaN  
17-Dec-2016 10:00:00, NaN  
17-Dec-2016 11:00:00, NaN  
17-Dec-2016 12:00:00, NaN  
17-Dec-2016 13:00:00, NaN  
17-Dec-2016 14:00:00, NaN  
17-Dec-2016 15:00:00, NaN  
17-Dec-2016 16:00:00, NaN  
17-Dec-2016 17:00:00, NaN  
17-Dec-2016 18:00:00, NaN  
17-Dec-2016 19:00:00, NaN  
17-Dec-2016 20:00:00, NaN  
17-Dec-2016 21:00:00, NaN  
17-Dec-2016 22:00:00, NaN  
17-Dec-2016 23:00:00, NaN  
18-Dec-2016, NaN  
18-Dec-2016 01:00:00, NaN  
18-Dec-2016 02:00:00, NaN  
18-Dec-2016 03:00:00, NaN  
18-Dec-2016 04:00:00, NaN  
18-Dec-2016 05:00:00, NaN  
18-Dec-2016 06:00:00, NaN  
18-Dec-2016 07:00:00, NaN  
18-Dec-2016 08:00:00, NaN  
18-Dec-2016 09:00:00, NaN  
18-Dec-2016 10:00:00, NaN  
18-Dec-2016 11:00:00, NaN  
18-Dec-2016 12:00:00, NaN  
18-Dec-2016 13:00:00, NaN  
18-Dec-2016 14:00:00, NaN  
18-Dec-2016 15:00:00, NaN  
18-Dec-2016 16:00:00, NaN  
18-Dec-2016 17:00:00, NaN  
18-Dec-2016 18:00:00, NaN  
18-Dec-2016 19:00:00, NaN  
18-Dec-2016 20:00:00, NaN  
18-Dec-2016 21:00:00, NaN  
18-Dec-2016 22:00:00, NaN  
18-Dec-2016 23:00:00, NaN  
19-Dec-2016, NaN  
19-Dec-2016 01:00:00, NaN  
19-Dec-2016 02:00:00, NaN  
19-Dec-2016 03:00:00, NaN  
19-Dec-2016 04:00:00, NaN  
19-Dec-2016 05:00:00, NaN  
19-Dec-2016 06:00:00, NaN  
19-Dec-2016 07:00:00, NaN  
19-Dec-2016 08:00:00, NaN  
19-Dec-2016 09:00:00, NaN

19-Dec-2016 10:00:00, NaN  
19-Dec-2016 11:00:00, NaN  
19-Dec-2016 12:00:00, NaN  
19-Dec-2016 13:00:00, NaN  
19-Dec-2016 14:00:00, NaN  
19-Dec-2016 15:00:00, NaN  
19-Dec-2016 16:00:00, NaN  
19-Dec-2016 17:00:00, NaN  
19-Dec-2016 18:00:00, NaN  
19-Dec-2016 19:00:00, NaN  
19-Dec-2016 20:00:00, NaN  
19-Dec-2016 21:00:00, NaN  
19-Dec-2016 22:00:00, NaN  
19-Dec-2016 23:00:00, NaN  
20-Dec-2016, NaN  
20-Dec-2016 01:00:00, NaN  
20-Dec-2016 02:00:00, NaN  
20-Dec-2016 03:00:00, NaN  
20-Dec-2016 04:00:00, NaN  
20-Dec-2016 05:00:00, NaN  
20-Dec-2016 06:00:00, NaN  
20-Dec-2016 07:00:00, NaN  
20-Dec-2016 08:00:00, NaN  
20-Dec-2016 09:00:00, NaN  
20-Dec-2016 10:00:00, NaN  
20-Dec-2016 11:00:00, NaN  
20-Dec-2016 12:00:00, NaN  
20-Dec-2016 13:00:00, NaN  
20-Dec-2016 14:00:00, NaN  
20-Dec-2016 15:00:00, NaN  
20-Dec-2016 16:00:00, NaN  
20-Dec-2016 17:00:00, NaN  
20-Dec-2016 18:00:00, NaN  
20-Dec-2016 19:00:00, NaN  
20-Dec-2016 20:00:00, NaN  
20-Dec-2016 21:00:00, NaN  
20-Dec-2016 22:00:00, NaN  
20-Dec-2016 23:00:00, NaN  
21-Dec-2016, NaN  
21-Dec-2016 01:00:00, NaN  
21-Dec-2016 02:00:00, NaN  
21-Dec-2016 03:00:00, NaN  
21-Dec-2016 04:00:00, NaN  
21-Dec-2016 05:00:00, NaN  
21-Dec-2016 06:00:00, NaN  
21-Dec-2016 07:00:00, NaN  
21-Dec-2016 08:00:00, NaN  
21-Dec-2016 09:00:00, NaN  
21-Dec-2016 10:00:00, NaN  
21-Dec-2016 11:00:00, NaN  
21-Dec-2016 12:00:00, NaN  
21-Dec-2016 13:00:00, NaN  
21-Dec-2016 14:00:00, NaN  
21-Dec-2016 15:00:00, NaN  
21-Dec-2016 16:00:00, NaN  
21-Dec-2016 17:00:00, NaN  
21-Dec-2016 18:00:00, NaN  
21-Dec-2016 19:00:00, NaN  
21-Dec-2016 20:00:00, NaN  
21-Dec-2016 21:00:00, NaN  
21-Dec-2016 22:00:00, NaN  
21-Dec-2016 23:00:00, NaN  
22-Dec-2016, NaN  
22-Dec-2016 01:00:00, NaN

22-Dec-2016 02:00:00, NaN  
22-Dec-2016 03:00:00, NaN  
22-Dec-2016 04:00:00, NaN  
22-Dec-2016 05:00:00, NaN  
22-Dec-2016 06:00:00, NaN  
22-Dec-2016 07:00:00, NaN  
22-Dec-2016 08:00:00, NaN  
22-Dec-2016 09:00:00, NaN  
22-Dec-2016 10:00:00, NaN  
22-Dec-2016 11:00:00, NaN  
22-Dec-2016 12:00:00, NaN  
22-Dec-2016 13:00:00, NaN  
22-Dec-2016 14:00:00, NaN  
22-Dec-2016 15:00:00, NaN  
22-Dec-2016 16:00:00, NaN  
22-Dec-2016 17:00:00, NaN  
22-Dec-2016 18:00:00, NaN  
22-Dec-2016 19:00:00, NaN  
22-Dec-2016 20:00:00, NaN  
22-Dec-2016 21:00:00, NaN  
22-Dec-2016 22:00:00, NaN  
22-Dec-2016 23:00:00, NaN  
23-Dec-2016, NaN  
23-Dec-2016 01:00:00, NaN  
23-Dec-2016 02:00:00, NaN  
23-Dec-2016 03:00:00, NaN  
23-Dec-2016 04:00:00, NaN  
23-Dec-2016 05:00:00, NaN  
23-Dec-2016 06:00:00, NaN  
23-Dec-2016 07:00:00, NaN  
23-Dec-2016 08:00:00, NaN  
23-Dec-2016 09:00:00, NaN  
23-Dec-2016 10:00:00, NaN  
23-Dec-2016 11:00:00, NaN  
23-Dec-2016 12:00:00, NaN  
23-Dec-2016 13:00:00, NaN  
23-Dec-2016 14:00:00, NaN  
23-Dec-2016 15:00:00, NaN  
23-Dec-2016 16:00:00, NaN  
23-Dec-2016 17:00:00, NaN  
23-Dec-2016 18:00:00, NaN  
23-Dec-2016 19:00:00, NaN  
23-Dec-2016 20:00:00, NaN  
23-Dec-2016 21:00:00, NaN  
23-Dec-2016 22:00:00, NaN  
23-Dec-2016 23:00:00, NaN  
24-Dec-2016, NaN  
24-Dec-2016 01:00:00, NaN  
24-Dec-2016 02:00:00, NaN  
24-Dec-2016 03:00:00, NaN  
24-Dec-2016 04:00:00, NaN  
24-Dec-2016 05:00:00, NaN  
24-Dec-2016 06:00:00, NaN  
24-Dec-2016 07:00:00, NaN  
24-Dec-2016 08:00:00, NaN  
24-Dec-2016 09:00:00, NaN  
24-Dec-2016 10:00:00, NaN  
24-Dec-2016 11:00:00, NaN  
24-Dec-2016 12:00:00, NaN  
24-Dec-2016 13:00:00, NaN  
24-Dec-2016 14:00:00, NaN  
24-Dec-2016 15:00:00, NaN  
24-Dec-2016 16:00:00, NaN  
24-Dec-2016 17:00:00, NaN



|              |           |     |
|--------------|-----------|-----|
| 24-Dec-2016  | 18:00:00, | NaN |
| 24-Dec-2016  | 19:00:00, | NaN |
| 24-Dec-2016  | 20:00:00, | NaN |
| 24-Dec-2016  | 21:00:00, | NaN |
| 24-Dec-2016  | 22:00:00, | NaN |
| 24-Dec-2016  | 23:00:00, | NaN |
| 25-Dec-2016, | NaN       |     |
| 25-Dec-2016  | 01:00:00, | NaN |
| 25-Dec-2016  | 02:00:00, | NaN |
| 25-Dec-2016  | 03:00:00, | NaN |
| 25-Dec-2016  | 04:00:00, | NaN |
| 25-Dec-2016  | 05:00:00, | NaN |
| 25-Dec-2016  | 06:00:00, | NaN |
| 25-Dec-2016  | 07:00:00, | NaN |
| 25-Dec-2016  | 08:00:00, | NaN |
| 25-Dec-2016  | 09:00:00, | NaN |
| 25-Dec-2016  | 10:00:00, | NaN |
| 25-Dec-2016  | 11:00:00, | NaN |
| 25-Dec-2016  | 12:00:00, | NaN |
| 25-Dec-2016  | 13:00:00, | NaN |
| 25-Dec-2016  | 14:00:00, | NaN |
| 25-Dec-2016  | 15:00:00, | NaN |
| 25-Dec-2016  | 16:00:00, | NaN |
| 25-Dec-2016  | 17:00:00, | NaN |
| 25-Dec-2016  | 18:00:00, | NaN |
| 25-Dec-2016  | 19:00:00, | NaN |
| 25-Dec-2016  | 20:00:00, | NaN |
| 25-Dec-2016  | 21:00:00, | NaN |
| 25-Dec-2016  | 22:00:00, | NaN |
| 25-Dec-2016  | 23:00:00, | NaN |
| 26-Dec-2016, | NaN       |     |
| 26-Dec-2016  | 01:00:00, | NaN |
| 26-Dec-2016  | 02:00:00, | NaN |
| 26-Dec-2016  | 03:00:00, | NaN |
| 26-Dec-2016  | 04:00:00, | NaN |
| 26-Dec-2016  | 05:00:00, | NaN |
| 26-Dec-2016  | 06:00:00, | NaN |
| 26-Dec-2016  | 07:00:00, | NaN |
| 26-Dec-2016  | 08:00:00, | NaN |
| 26-Dec-2016  | 09:00:00, | NaN |
| 26-Dec-2016  | 10:00:00, | NaN |
| 26-Dec-2016  | 11:00:00, | NaN |
| 26-Dec-2016  | 12:00:00, | NaN |
| 26-Dec-2016  | 13:00:00, | NaN |
| 26-Dec-2016  | 14:00:00, | NaN |
| 26-Dec-2016  | 15:00:00, | NaN |
| 26-Dec-2016  | 16:00:00, | NaN |
| 26-Dec-2016  | 17:00:00, | NaN |
| 26-Dec-2016  | 18:00:00, | NaN |
| 26-Dec-2016  | 19:00:00, | NaN |
| 26-Dec-2016  | 20:00:00, | NaN |
| 26-Dec-2016  | 21:00:00, | NaN |
| 26-Dec-2016  | 22:00:00, | NaN |
| 26-Dec-2016  | 23:00:00, | NaN |
| 27-Dec-2016, | NaN       |     |
| 27-Dec-2016  | 01:00:00, | NaN |
| 27-Dec-2016  | 02:00:00, | NaN |
| 27-Dec-2016  | 03:00:00, | NaN |
| 27-Dec-2016  | 04:00:00, | NaN |
| 27-Dec-2016  | 05:00:00, | NaN |
| 27-Dec-2016  | 06:00:00, | NaN |
| 27-Dec-2016  | 07:00:00, | NaN |
| 27-Dec-2016  | 08:00:00, | NaN |
| 27-Dec-2016  | 09:00:00, | NaN |

27-Dec-2016 10:00:00, NaN  
27-Dec-2016 11:00:00, NaN  
27-Dec-2016 12:00:00, NaN  
27-Dec-2016 13:00:00, NaN  
27-Dec-2016 14:00:00, NaN  
27-Dec-2016 15:00:00, NaN  
27-Dec-2016 16:00:00, NaN  
27-Dec-2016 17:00:00, NaN  
27-Dec-2016 18:00:00, NaN  
27-Dec-2016 19:00:00, NaN  
27-Dec-2016 20:00:00, NaN  
27-Dec-2016 21:00:00, NaN  
27-Dec-2016 22:00:00, NaN  
27-Dec-2016 23:00:00, NaN  
28-Dec-2016, NaN  
28-Dec-2016 01:00:00, NaN  
28-Dec-2016 02:00:00, NaN  
28-Dec-2016 03:00:00, NaN  
28-Dec-2016 04:00:00, NaN  
28-Dec-2016 05:00:00, NaN  
28-Dec-2016 06:00:00, NaN  
28-Dec-2016 07:00:00, NaN  
28-Dec-2016 08:00:00, NaN  
28-Dec-2016 09:00:00, NaN  
28-Dec-2016 10:00:00, NaN  
28-Dec-2016 11:00:00, NaN  
28-Dec-2016 12:00:00, NaN  
28-Dec-2016 13:00:00, NaN  
28-Dec-2016 14:00:00, NaN  
28-Dec-2016 15:00:00, NaN  
28-Dec-2016 16:00:00, NaN  
28-Dec-2016 17:00:00, NaN  
28-Dec-2016 18:00:00, NaN  
28-Dec-2016 19:00:00, NaN  
28-Dec-2016 20:00:00, NaN  
28-Dec-2016 21:00:00, NaN  
28-Dec-2016 22:00:00, NaN  
28-Dec-2016 23:00:00, NaN  
29-Dec-2016, NaN  
29-Dec-2016 01:00:00, NaN  
29-Dec-2016 02:00:00, NaN  
29-Dec-2016 03:00:00, NaN  
29-Dec-2016 04:00:00, NaN  
29-Dec-2016 05:00:00, NaN  
29-Dec-2016 06:00:00, NaN  
29-Dec-2016 07:00:00, NaN  
29-Dec-2016 08:00:00, NaN  
29-Dec-2016 09:00:00, NaN  
29-Dec-2016 10:00:00, NaN  
29-Dec-2016 11:00:00, NaN  
29-Dec-2016 12:00:00, NaN  
29-Dec-2016 13:00:00, NaN  
29-Dec-2016 14:00:00, NaN  
29-Dec-2016 15:00:00, NaN  
29-Dec-2016 16:00:00, NaN  
29-Dec-2016 17:00:00, NaN  
29-Dec-2016 18:00:00, NaN  
29-Dec-2016 19:00:00, NaN  
29-Dec-2016 20:00:00, NaN  
29-Dec-2016 21:00:00, NaN  
29-Dec-2016 22:00:00, NaN  
29-Dec-2016 23:00:00, NaN  
30-Dec-2016, NaN  
30-Dec-2016 01:00:00, NaN

|              |           |     |
|--------------|-----------|-----|
| 30-Dec-2016  | 02:00:00, | NaN |
| 30-Dec-2016  | 03:00:00, | NaN |
| 30-Dec-2016  | 04:00:00, | NaN |
| 30-Dec-2016  | 05:00:00, | NaN |
| 30-Dec-2016  | 06:00:00, | NaN |
| 30-Dec-2016  | 07:00:00, | NaN |
| 30-Dec-2016  | 08:00:00, | NaN |
| 30-Dec-2016  | 09:00:00, | NaN |
| 30-Dec-2016  | 10:00:00, | NaN |
| 30-Dec-2016  | 11:00:00, | NaN |
| 30-Dec-2016  | 12:00:00, | NaN |
| 30-Dec-2016  | 13:00:00, | NaN |
| 30-Dec-2016  | 14:00:00, | NaN |
| 30-Dec-2016  | 15:00:00, | NaN |
| 30-Dec-2016  | 16:00:00, | NaN |
| 30-Dec-2016  | 17:00:00, | NaN |
| 30-Dec-2016  | 18:00:00, | NaN |
| 30-Dec-2016  | 19:00:00, | NaN |
| 30-Dec-2016  | 20:00:00, | NaN |
| 30-Dec-2016  | 21:00:00, | NaN |
| 30-Dec-2016  | 22:00:00, | NaN |
| 30-Dec-2016  | 23:00:00, | NaN |
| 31-Dec-2016, | NaN       |     |
| 31-Dec-2016  | 01:00:00, | NaN |
| 31-Dec-2016  | 02:00:00, | NaN |
| 31-Dec-2016  | 03:00:00, | NaN |
| 31-Dec-2016  | 04:00:00, | NaN |
| 31-Dec-2016  | 05:00:00, | NaN |
| 31-Dec-2016  | 06:00:00, | NaN |
| 31-Dec-2016  | 07:00:00, | NaN |
| 31-Dec-2016  | 08:00:00, | NaN |
| 31-Dec-2016  | 09:00:00, | NaN |
| 31-Dec-2016  | 10:00:00, | NaN |
| 31-Dec-2016  | 11:00:00, | NaN |
| 31-Dec-2016  | 12:00:00, | NaN |
| 31-Dec-2016  | 13:00:00, | NaN |
| 31-Dec-2016  | 14:00:00, | NaN |
| 31-Dec-2016  | 15:00:00, | NaN |
| 31-Dec-2016  | 16:00:00, | NaN |
| 31-Dec-2016  | 17:00:00, | NaN |
| 31-Dec-2016  | 18:00:00, | NaN |
| 31-Dec-2016  | 19:00:00, | NaN |
| 31-Dec-2016  | 20:00:00, | NaN |
| 31-Dec-2016  | 21:00:00, | NaN |
| 31-Dec-2016  | 22:00:00, | NaN |
| 31-Dec-2016  | 23:00:00, | NaN |
| 01-Jan-2017, | NaN       |     |
| 01-Jan-2017  | 01:00:00, | NaN |
| 01-Jan-2017  | 02:00:00, | NaN |
| 01-Jan-2017  | 03:00:00, | NaN |
| 01-Jan-2017  | 04:00:00, | NaN |
| 01-Jan-2017  | 05:00:00, | NaN |
| 01-Jan-2017  | 06:00:00, | NaN |
| 01-Jan-2017  | 07:00:00, | NaN |
| 01-Jan-2017  | 08:00:00, | NaN |
| 01-Jan-2017  | 09:00:00, | NaN |
| 01-Jan-2017  | 10:00:00, | NaN |
| 01-Jan-2017  | 11:00:00, | NaN |
| 01-Jan-2017  | 12:00:00, | NaN |
| 01-Jan-2017  | 13:00:00, | NaN |
| 01-Jan-2017  | 14:00:00, | NaN |
| 01-Jan-2017  | 15:00:00, | NaN |
| 01-Jan-2017  | 16:00:00, | NaN |
| 01-Jan-2017  | 17:00:00, | NaN |

01-Jan-2017 18:00:00, NaN  
01-Jan-2017 19:00:00, NaN  
01-Jan-2017 20:00:00, NaN  
01-Jan-2017 21:00:00, NaN  
01-Jan-2017 22:00:00, NaN  
01-Jan-2017 23:00:00, NaN  
02-Jan-2017, NaN  
02-Jan-2017 01:00:00, NaN  
02-Jan-2017 02:00:00, NaN  
02-Jan-2017 03:00:00, NaN  
02-Jan-2017 04:00:00, NaN  
02-Jan-2017 05:00:00, NaN  
02-Jan-2017 06:00:00, NaN  
02-Jan-2017 07:00:00, NaN  
02-Jan-2017 08:00:00, NaN  
02-Jan-2017 09:00:00, NaN  
02-Jan-2017 10:00:00, NaN  
02-Jan-2017 11:00:00, NaN  
02-Jan-2017 12:00:00, NaN  
02-Jan-2017 13:00:00, NaN  
02-Jan-2017 14:00:00, NaN  
02-Jan-2017 15:00:00, NaN  
02-Jan-2017 16:00:00, NaN  
02-Jan-2017 17:00:00, NaN  
02-Jan-2017 18:00:00, NaN  
02-Jan-2017 19:00:00, NaN  
02-Jan-2017 20:00:00, NaN  
02-Jan-2017 21:00:00, NaN  
02-Jan-2017 22:00:00, NaN  
02-Jan-2017 23:00:00, NaN  
03-Jan-2017, NaN  
03-Jan-2017 01:00:00, NaN  
03-Jan-2017 02:00:00, NaN  
03-Jan-2017 03:00:00, NaN  
03-Jan-2017 04:00:00, NaN  
03-Jan-2017 05:00:00, NaN  
03-Jan-2017 06:00:00, NaN  
03-Jan-2017 07:00:00, NaN  
03-Jan-2017 08:00:00, NaN  
03-Jan-2017 09:00:00, NaN  
03-Jan-2017 10:00:00, NaN  
03-Jan-2017 11:00:00, NaN  
03-Jan-2017 12:00:00, NaN  
03-Jan-2017 13:00:00, NaN  
03-Jan-2017 14:00:00, NaN  
03-Jan-2017 15:00:00, NaN  
03-Jan-2017 16:00:00, NaN  
03-Jan-2017 17:00:00, NaN  
03-Jan-2017 18:00:00, NaN  
03-Jan-2017 19:00:00, NaN  
03-Jan-2017 20:00:00, NaN  
03-Jan-2017 21:00:00, NaN  
03-Jan-2017 22:00:00, NaN  
03-Jan-2017 23:00:00, NaN  
04-Jan-2017, NaN  
04-Jan-2017 01:00:00, NaN  
04-Jan-2017 02:00:00, NaN  
04-Jan-2017 03:00:00, NaN  
04-Jan-2017 04:00:00, NaN  
04-Jan-2017 05:00:00, NaN  
04-Jan-2017 06:00:00, NaN  
04-Jan-2017 07:00:00, NaN  
04-Jan-2017 08:00:00, NaN  
04-Jan-2017 09:00:00, NaN

04-Jan-2017 10:00:00, NaN  
04-Jan-2017 11:00:00, NaN  
04-Jan-2017 12:00:00, NaN  
04-Jan-2017 13:00:00, NaN  
04-Jan-2017 14:00:00, NaN  
04-Jan-2017 15:00:00, NaN  
04-Jan-2017 16:00:00, NaN  
04-Jan-2017 17:00:00, NaN  
04-Jan-2017 18:00:00, NaN  
04-Jan-2017 19:00:00, NaN  
04-Jan-2017 20:00:00, NaN  
04-Jan-2017 21:00:00, NaN  
04-Jan-2017 22:00:00, NaN  
04-Jan-2017 23:00:00, NaN  
05-Jan-2017, NaN  
05-Jan-2017 01:00:00, NaN  
05-Jan-2017 02:00:00, NaN  
05-Jan-2017 03:00:00, NaN  
05-Jan-2017 04:00:00, NaN  
05-Jan-2017 05:00:00, NaN  
05-Jan-2017 06:00:00, NaN  
05-Jan-2017 07:00:00, NaN  
05-Jan-2017 08:00:00, NaN  
05-Jan-2017 09:00:00, NaN  
05-Jan-2017 10:00:00, NaN  
05-Jan-2017 11:00:00, NaN  
05-Jan-2017 12:00:00, NaN  
05-Jan-2017 13:00:00, NaN  
05-Jan-2017 14:00:00, NaN  
05-Jan-2017 15:00:00, NaN  
05-Jan-2017 16:00:00, NaN  
05-Jan-2017 17:00:00, NaN  
05-Jan-2017 18:00:00, NaN  
05-Jan-2017 19:00:00, NaN  
05-Jan-2017 20:00:00, NaN  
05-Jan-2017 21:00:00, NaN  
05-Jan-2017 22:00:00, NaN  
05-Jan-2017 23:00:00, NaN  
06-Jan-2017, NaN  
06-Jan-2017 01:00:00, NaN  
06-Jan-2017 02:00:00, NaN  
06-Jan-2017 03:00:00, NaN  
06-Jan-2017 04:00:00, NaN  
06-Jan-2017 05:00:00, NaN  
06-Jan-2017 06:00:00, NaN  
06-Jan-2017 07:00:00, NaN  
06-Jan-2017 08:00:00, NaN  
06-Jan-2017 09:00:00, NaN  
06-Jan-2017 10:00:00, NaN  
06-Jan-2017 11:00:00, NaN  
06-Jan-2017 12:00:00, NaN  
06-Jan-2017 13:00:00, NaN  
06-Jan-2017 14:00:00, NaN  
06-Jan-2017 15:00:00, NaN  
06-Jan-2017 16:00:00, NaN  
06-Jan-2017 17:00:00, NaN  
06-Jan-2017 18:00:00, NaN  
06-Jan-2017 19:00:00, NaN  
06-Jan-2017 20:00:00, NaN  
06-Jan-2017 21:00:00, NaN  
06-Jan-2017 22:00:00, NaN  
06-Jan-2017 23:00:00, NaN  
07-Jan-2017, NaN  
07-Jan-2017 01:00:00, NaN

07-Jan-2017 02:00:00, NaN  
07-Jan-2017 03:00:00, NaN  
07-Jan-2017 04:00:00, NaN  
07-Jan-2017 05:00:00, NaN  
07-Jan-2017 06:00:00, NaN  
07-Jan-2017 07:00:00, NaN  
07-Jan-2017 08:00:00, NaN  
07-Jan-2017 09:00:00, NaN  
07-Jan-2017 10:00:00, NaN  
07-Jan-2017 11:00:00, NaN  
07-Jan-2017 12:00:00, NaN  
07-Jan-2017 13:00:00, NaN  
07-Jan-2017 14:00:00, NaN  
07-Jan-2017 15:00:00, NaN  
07-Jan-2017 16:00:00, NaN  
07-Jan-2017 17:00:00, NaN  
07-Jan-2017 18:00:00, NaN  
07-Jan-2017 19:00:00, NaN  
07-Jan-2017 20:00:00, NaN  
07-Jan-2017 21:00:00, NaN  
07-Jan-2017 22:00:00, NaN  
07-Jan-2017 23:00:00, NaN  
08-Jan-2017, NaN  
08-Jan-2017 01:00:00, NaN  
08-Jan-2017 02:00:00, NaN  
08-Jan-2017 03:00:00, NaN  
08-Jan-2017 04:00:00, NaN  
08-Jan-2017 05:00:00, NaN  
08-Jan-2017 06:00:00, NaN  
08-Jan-2017 07:00:00, NaN  
08-Jan-2017 08:00:00, NaN  
08-Jan-2017 09:00:00, NaN  
08-Jan-2017 10:00:00, NaN  
08-Jan-2017 11:00:00, NaN  
08-Jan-2017 12:00:00, NaN  
08-Jan-2017 13:00:00, NaN  
08-Jan-2017 14:00:00, NaN  
08-Jan-2017 15:00:00, NaN  
08-Jan-2017 16:00:00, NaN  
08-Jan-2017 17:00:00, NaN  
08-Jan-2017 18:00:00, NaN  
08-Jan-2017 19:00:00, NaN  
08-Jan-2017 20:00:00, NaN  
08-Jan-2017 21:00:00, NaN  
08-Jan-2017 22:00:00, NaN  
08-Jan-2017 23:00:00, NaN  
09-Jan-2017, NaN  
09-Jan-2017 01:00:00, NaN  
09-Jan-2017 02:00:00, NaN  
09-Jan-2017 03:00:00, NaN  
09-Jan-2017 04:00:00, NaN  
09-Jan-2017 05:00:00, NaN  
09-Jan-2017 06:00:00, NaN  
09-Jan-2017 07:00:00, NaN  
09-Jan-2017 08:00:00, NaN  
09-Jan-2017 09:00:00, NaN  
09-Jan-2017 10:00:00, NaN  
09-Jan-2017 11:00:00, NaN  
09-Jan-2017 12:00:00, NaN  
09-Jan-2017 13:00:00, NaN  
09-Jan-2017 14:00:00, NaN  
09-Jan-2017 15:00:00, NaN  
09-Jan-2017 16:00:00, NaN  
09-Jan-2017 17:00:00, NaN

|              |           |     |
|--------------|-----------|-----|
| 09-Jan-2017  | 18:00:00, | NaN |
| 09-Jan-2017  | 19:00:00, | NaN |
| 09-Jan-2017  | 20:00:00, | NaN |
| 09-Jan-2017  | 21:00:00, | NaN |
| 09-Jan-2017  | 22:00:00, | NaN |
| 09-Jan-2017  | 23:00:00, | NaN |
| 10-Jan-2017, | NaN       |     |
| 10-Jan-2017  | 01:00:00, | NaN |
| 10-Jan-2017  | 02:00:00, | NaN |
| 10-Jan-2017  | 03:00:00, | NaN |
| 10-Jan-2017  | 04:00:00, | NaN |
| 10-Jan-2017  | 05:00:00, | NaN |
| 10-Jan-2017  | 06:00:00, | NaN |
| 10-Jan-2017  | 07:00:00, | NaN |
| 10-Jan-2017  | 08:00:00, | NaN |
| 10-Jan-2017  | 09:00:00, | NaN |
| 10-Jan-2017  | 10:00:00, | NaN |
| 10-Jan-2017  | 11:00:00, | NaN |
| 10-Jan-2017  | 12:00:00, | NaN |
| 10-Jan-2017  | 13:00:00, | NaN |
| 10-Jan-2017  | 14:00:00, | NaN |
| 10-Jan-2017  | 15:00:00, | NaN |
| 10-Jan-2017  | 16:00:00, | NaN |
| 10-Jan-2017  | 17:00:00, | NaN |
| 10-Jan-2017  | 18:00:00, | NaN |
| 10-Jan-2017  | 19:00:00, | NaN |
| 10-Jan-2017  | 20:00:00, | NaN |
| 10-Jan-2017  | 21:00:00, | NaN |
| 10-Jan-2017  | 22:00:00, | NaN |
| 10-Jan-2017  | 23:00:00, | NaN |
| 11-Jan-2017, | NaN       |     |
| 11-Jan-2017  | 01:00:00, | NaN |
| 11-Jan-2017  | 02:00:00, | NaN |
| 11-Jan-2017  | 03:00:00, | NaN |
| 11-Jan-2017  | 04:00:00, | NaN |
| 11-Jan-2017  | 05:00:00, | NaN |
| 11-Jan-2017  | 06:00:00, | NaN |
| 11-Jan-2017  | 07:00:00, | NaN |
| 11-Jan-2017  | 08:00:00, | NaN |
| 11-Jan-2017  | 09:00:00, | NaN |
| 11-Jan-2017  | 10:00:00, | NaN |
| 11-Jan-2017  | 11:00:00, | NaN |
| 11-Jan-2017  | 12:00:00, | NaN |
| 11-Jan-2017  | 13:00:00, | NaN |
| 11-Jan-2017  | 14:00:00, | NaN |
| 11-Jan-2017  | 15:00:00, | NaN |
| 11-Jan-2017  | 16:00:00, | NaN |
| 11-Jan-2017  | 17:00:00, | NaN |
| 11-Jan-2017  | 18:00:00, | NaN |
| 11-Jan-2017  | 19:00:00, | NaN |
| 11-Jan-2017  | 20:00:00, | NaN |
| 11-Jan-2017  | 21:00:00, | NaN |
| 11-Jan-2017  | 22:00:00, | NaN |
| 11-Jan-2017  | 23:00:00, | NaN |
| 12-Jan-2017, | NaN       |     |
| 12-Jan-2017  | 01:00:00, | NaN |
| 12-Jan-2017  | 02:00:00, | NaN |
| 12-Jan-2017  | 03:00:00, | NaN |
| 12-Jan-2017  | 04:00:00, | NaN |
| 12-Jan-2017  | 05:00:00, | NaN |
| 12-Jan-2017  | 06:00:00, | NaN |
| 12-Jan-2017  | 07:00:00, | NaN |
| 12-Jan-2017  | 08:00:00, | NaN |
| 12-Jan-2017  | 09:00:00, | NaN |

12-Jan-2017 10:00:00, NaN  
12-Jan-2017 11:00:00, NaN  
12-Jan-2017 12:00:00, NaN  
12-Jan-2017 13:00:00, NaN  
12-Jan-2017 14:00:00, NaN  
12-Jan-2017 15:00:00, NaN  
12-Jan-2017 16:00:00, NaN  
12-Jan-2017 17:00:00, NaN  
12-Jan-2017 18:00:00, NaN  
12-Jan-2017 19:00:00, NaN  
12-Jan-2017 20:00:00, NaN  
12-Jan-2017 21:00:00, NaN  
12-Jan-2017 22:00:00, NaN  
12-Jan-2017 23:00:00, NaN  
13-Jan-2017, NaN  
13-Jan-2017 01:00:00, NaN  
13-Jan-2017 02:00:00, NaN  
13-Jan-2017 03:00:00, NaN  
13-Jan-2017 04:00:00, NaN  
13-Jan-2017 05:00:00, NaN  
13-Jan-2017 06:00:00, NaN  
13-Jan-2017 07:00:00, NaN  
13-Jan-2017 08:00:00, NaN  
13-Jan-2017 09:00:00, NaN  
13-Jan-2017 10:00:00, NaN  
13-Jan-2017 11:00:00, NaN  
13-Jan-2017 12:00:00, NaN  
13-Jan-2017 13:00:00, NaN  
13-Jan-2017 14:00:00, NaN  
13-Jan-2017 15:00:00, NaN  
13-Jan-2017 16:00:00, NaN  
13-Jan-2017 17:00:00, NaN  
13-Jan-2017 18:00:00, NaN  
13-Jan-2017 19:00:00, NaN  
13-Jan-2017 20:00:00, NaN  
13-Jan-2017 21:00:00, NaN  
13-Jan-2017 22:00:00, NaN  
13-Jan-2017 23:00:00, NaN  
14-Jan-2017, NaN  
14-Jan-2017 01:00:00, NaN  
14-Jan-2017 02:00:00, NaN  
14-Jan-2017 03:00:00, NaN  
14-Jan-2017 04:00:00, NaN  
14-Jan-2017 05:00:00, NaN  
14-Jan-2017 06:00:00, NaN  
14-Jan-2017 07:00:00, NaN  
14-Jan-2017 08:00:00, NaN  
14-Jan-2017 09:00:00, NaN  
14-Jan-2017 10:00:00, NaN  
14-Jan-2017 11:00:00, NaN  
14-Jan-2017 12:00:00, NaN  
14-Jan-2017 13:00:00, NaN  
14-Jan-2017 14:00:00, NaN  
14-Jan-2017 15:00:00, NaN  
14-Jan-2017 16:00:00, NaN  
14-Jan-2017 17:00:00, NaN  
14-Jan-2017 18:00:00, NaN  
14-Jan-2017 19:00:00, NaN  
14-Jan-2017 20:00:00, NaN  
14-Jan-2017 21:00:00, NaN  
14-Jan-2017 22:00:00, NaN  
14-Jan-2017 23:00:00, NaN  
15-Jan-2017, NaN  
15-Jan-2017 01:00:00, NaN



15-Jan-2017 02:00:00, NaN  
15-Jan-2017 03:00:00, NaN  
15-Jan-2017 04:00:00, NaN  
15-Jan-2017 05:00:00, NaN  
15-Jan-2017 06:00:00, NaN  
15-Jan-2017 07:00:00, NaN  
15-Jan-2017 08:00:00, NaN  
15-Jan-2017 09:00:00, NaN  
15-Jan-2017 10:00:00, NaN  
15-Jan-2017 11:00:00, NaN  
15-Jan-2017 12:00:00, NaN  
15-Jan-2017 13:00:00, NaN  
15-Jan-2017 14:00:00, NaN  
15-Jan-2017 15:00:00, NaN  
15-Jan-2017 16:00:00, NaN  
15-Jan-2017 17:00:00, NaN  
15-Jan-2017 18:00:00, NaN  
15-Jan-2017 19:00:00, NaN  
15-Jan-2017 20:00:00, NaN  
15-Jan-2017 21:00:00, NaN  
15-Jan-2017 22:00:00, NaN  
15-Jan-2017 23:00:00, NaN  
16-Jan-2017, NaN  
16-Jan-2017 01:00:00, NaN  
16-Jan-2017 02:00:00, NaN  
16-Jan-2017 03:00:00, NaN  
16-Jan-2017 04:00:00, NaN  
16-Jan-2017 05:00:00, NaN  
16-Jan-2017 06:00:00, NaN  
16-Jan-2017 07:00:00, NaN  
16-Jan-2017 08:00:00, NaN  
16-Jan-2017 09:00:00, NaN  
16-Jan-2017 10:00:00, NaN  
16-Jan-2017 11:00:00, NaN  
16-Jan-2017 12:00:00, NaN  
16-Jan-2017 13:00:00, NaN  
16-Jan-2017 14:00:00, NaN  
16-Jan-2017 15:00:00, NaN  
16-Jan-2017 16:00:00, NaN  
16-Jan-2017 17:00:00, NaN  
16-Jan-2017 18:00:00, NaN  
16-Jan-2017 19:00:00, NaN  
16-Jan-2017 20:00:00, NaN  
16-Jan-2017 21:00:00, NaN  
16-Jan-2017 22:00:00, NaN  
16-Jan-2017 23:00:00, NaN  
17-Jan-2017, NaN  
17-Jan-2017 01:00:00, NaN  
17-Jan-2017 02:00:00, NaN  
17-Jan-2017 03:00:00, NaN  
17-Jan-2017 04:00:00, NaN  
17-Jan-2017 05:00:00, NaN  
17-Jan-2017 06:00:00, NaN  
17-Jan-2017 07:00:00, NaN  
17-Jan-2017 08:00:00, NaN  
17-Jan-2017 09:00:00, NaN  
17-Jan-2017 10:00:00, NaN  
17-Jan-2017 11:00:00, NaN  
17-Jan-2017 12:00:00, NaN  
17-Jan-2017 13:00:00, NaN  
17-Jan-2017 14:00:00, NaN  
17-Jan-2017 15:00:00, NaN  
17-Jan-2017 16:00:00, NaN  
17-Jan-2017 17:00:00, NaN

17-Jan-2017 18:00:00, NaN  
17-Jan-2017 19:00:00, NaN  
17-Jan-2017 20:00:00, NaN  
17-Jan-2017 21:00:00, NaN  
17-Jan-2017 22:00:00, NaN  
17-Jan-2017 23:00:00, NaN  
18-Jan-2017, NaN  
18-Jan-2017 01:00:00, NaN  
18-Jan-2017 02:00:00, NaN  
18-Jan-2017 03:00:00, NaN  
18-Jan-2017 04:00:00, NaN  
18-Jan-2017 05:00:00, NaN  
18-Jan-2017 06:00:00, NaN  
18-Jan-2017 07:00:00, NaN  
18-Jan-2017 08:00:00, NaN  
18-Jan-2017 09:00:00, NaN  
18-Jan-2017 10:00:00, NaN  
18-Jan-2017 11:00:00, NaN  
18-Jan-2017 12:00:00, NaN  
18-Jan-2017 13:00:00, NaN  
18-Jan-2017 14:00:00, NaN  
18-Jan-2017 15:00:00, NaN  
18-Jan-2017 16:00:00, NaN  
18-Jan-2017 17:00:00, NaN  
18-Jan-2017 18:00:00, NaN  
18-Jan-2017 19:00:00, NaN  
18-Jan-2017 20:00:00, NaN  
18-Jan-2017 21:00:00, NaN  
18-Jan-2017 22:00:00, NaN  
18-Jan-2017 23:00:00, NaN  
19-Jan-2017, NaN  
19-Jan-2017 01:00:00, NaN  
19-Jan-2017 02:00:00, NaN  
19-Jan-2017 03:00:00, NaN  
19-Jan-2017 04:00:00, NaN  
19-Jan-2017 05:00:00, NaN  
19-Jan-2017 06:00:00, NaN  
19-Jan-2017 07:00:00, NaN  
19-Jan-2017 08:00:00, NaN  
19-Jan-2017 09:00:00, NaN  
19-Jan-2017 10:00:00, NaN  
19-Jan-2017 11:00:00, NaN  
19-Jan-2017 12:00:00, NaN  
19-Jan-2017 13:00:00, NaN  
19-Jan-2017 14:00:00, NaN  
19-Jan-2017 15:00:00, NaN  
19-Jan-2017 16:00:00, NaN  
19-Jan-2017 17:00:00, NaN  
19-Jan-2017 18:00:00, NaN  
19-Jan-2017 19:00:00, NaN  
19-Jan-2017 20:00:00, NaN  
19-Jan-2017 21:00:00, NaN  
19-Jan-2017 22:00:00, NaN  
19-Jan-2017 23:00:00, NaN  
20-Jan-2017, NaN  
20-Jan-2017 01:00:00, NaN  
20-Jan-2017 02:00:00, NaN  
20-Jan-2017 03:00:00, NaN  
20-Jan-2017 04:00:00, NaN  
20-Jan-2017 05:00:00, NaN  
20-Jan-2017 06:00:00, NaN  
20-Jan-2017 07:00:00, NaN  
20-Jan-2017 08:00:00, NaN  
20-Jan-2017 09:00:00, NaN

20-Jan-2017 10:00:00, NaN  
20-Jan-2017 11:00:00, NaN  
20-Jan-2017 12:00:00, NaN  
20-Jan-2017 13:00:00, NaN  
20-Jan-2017 14:00:00, NaN  
20-Jan-2017 15:00:00, NaN  
20-Jan-2017 16:00:00, NaN  
20-Jan-2017 17:00:00, NaN  
20-Jan-2017 18:00:00, NaN  
20-Jan-2017 19:00:00, NaN  
20-Jan-2017 20:00:00, NaN  
20-Jan-2017 21:00:00, NaN  
20-Jan-2017 22:00:00, NaN  
20-Jan-2017 23:00:00, NaN  
21-Jan-2017, NaN  
21-Jan-2017 01:00:00, NaN  
21-Jan-2017 02:00:00, NaN  
21-Jan-2017 03:00:00, NaN  
21-Jan-2017 04:00:00, NaN  
21-Jan-2017 05:00:00, NaN  
21-Jan-2017 06:00:00, NaN  
21-Jan-2017 07:00:00, NaN  
21-Jan-2017 08:00:00, NaN  
21-Jan-2017 09:00:00, NaN  
21-Jan-2017 10:00:00, NaN  
21-Jan-2017 11:00:00, NaN  
21-Jan-2017 12:00:00, NaN  
21-Jan-2017 13:00:00, NaN  
21-Jan-2017 14:00:00, NaN  
21-Jan-2017 15:00:00, NaN  
21-Jan-2017 16:00:00, NaN  
21-Jan-2017 17:00:00, NaN  
21-Jan-2017 18:00:00, NaN  
21-Jan-2017 19:00:00, NaN  
21-Jan-2017 20:00:00, NaN  
21-Jan-2017 21:00:00, NaN  
21-Jan-2017 22:00:00, NaN  
21-Jan-2017 23:00:00, NaN  
22-Jan-2017, NaN  
22-Jan-2017 01:00:00, NaN  
22-Jan-2017 02:00:00, NaN  
22-Jan-2017 03:00:00, NaN  
22-Jan-2017 04:00:00, NaN  
22-Jan-2017 05:00:00, NaN  
22-Jan-2017 06:00:00, NaN  
22-Jan-2017 07:00:00, NaN  
22-Jan-2017 08:00:00, NaN  
22-Jan-2017 09:00:00, NaN  
22-Jan-2017 10:00:00, NaN  
22-Jan-2017 11:00:00, NaN  
22-Jan-2017 12:00:00, NaN  
22-Jan-2017 13:00:00, NaN  
22-Jan-2017 14:00:00, NaN  
22-Jan-2017 15:00:00, NaN  
22-Jan-2017 16:00:00, NaN  
22-Jan-2017 17:00:00, NaN  
22-Jan-2017 18:00:00, NaN  
22-Jan-2017 19:00:00, NaN  
22-Jan-2017 20:00:00, NaN  
22-Jan-2017 21:00:00, NaN  
22-Jan-2017 22:00:00, NaN  
22-Jan-2017 23:00:00, NaN  
23-Jan-2017, NaN  
23-Jan-2017 01:00:00, NaN

|              |           |     |
|--------------|-----------|-----|
| 23-Jan-2017  | 02:00:00, | NaN |
| 23-Jan-2017  | 03:00:00, | NaN |
| 23-Jan-2017  | 04:00:00, | NaN |
| 23-Jan-2017  | 05:00:00, | NaN |
| 23-Jan-2017  | 06:00:00, | NaN |
| 23-Jan-2017  | 07:00:00, | NaN |
| 23-Jan-2017  | 08:00:00, | NaN |
| 23-Jan-2017  | 09:00:00, | NaN |
| 23-Jan-2017  | 10:00:00, | NaN |
| 23-Jan-2017  | 11:00:00, | NaN |
| 23-Jan-2017  | 12:00:00, | NaN |
| 23-Jan-2017  | 13:00:00, | NaN |
| 23-Jan-2017  | 14:00:00, | NaN |
| 23-Jan-2017  | 15:00:00, | NaN |
| 23-Jan-2017  | 16:00:00, | NaN |
| 23-Jan-2017  | 17:00:00, | NaN |
| 23-Jan-2017  | 18:00:00, | NaN |
| 23-Jan-2017  | 19:00:00, | NaN |
| 23-Jan-2017  | 20:00:00, | NaN |
| 23-Jan-2017  | 21:00:00, | NaN |
| 23-Jan-2017  | 22:00:00, | NaN |
| 23-Jan-2017  | 23:00:00, | NaN |
| 24-Jan-2017, | NaN       |     |
| 24-Jan-2017  | 01:00:00, | NaN |
| 24-Jan-2017  | 02:00:00, | NaN |
| 24-Jan-2017  | 03:00:00, | NaN |
| 24-Jan-2017  | 04:00:00, | NaN |
| 24-Jan-2017  | 05:00:00, | NaN |
| 24-Jan-2017  | 06:00:00, | NaN |
| 24-Jan-2017  | 07:00:00, | NaN |
| 24-Jan-2017  | 08:00:00, | NaN |
| 24-Jan-2017  | 09:00:00, | NaN |
| 24-Jan-2017  | 10:00:00, | NaN |
| 24-Jan-2017  | 11:00:00, | NaN |
| 24-Jan-2017  | 12:00:00, | NaN |
| 24-Jan-2017  | 13:00:00, | NaN |
| 24-Jan-2017  | 14:00:00, | NaN |
| 24-Jan-2017  | 15:00:00, | NaN |
| 24-Jan-2017  | 16:00:00, | NaN |
| 24-Jan-2017  | 17:00:00, | NaN |
| 24-Jan-2017  | 18:00:00, | NaN |
| 24-Jan-2017  | 19:00:00, | NaN |
| 24-Jan-2017  | 20:00:00, | NaN |
| 24-Jan-2017  | 21:00:00, | NaN |
| 24-Jan-2017  | 22:00:00, | NaN |
| 24-Jan-2017  | 23:00:00, | NaN |
| 25-Jan-2017, | NaN       |     |
| 25-Jan-2017  | 01:00:00, | NaN |
| 25-Jan-2017  | 02:00:00, | NaN |
| 25-Jan-2017  | 03:00:00, | NaN |
| 25-Jan-2017  | 04:00:00, | NaN |
| 25-Jan-2017  | 05:00:00, | NaN |
| 25-Jan-2017  | 06:00:00, | NaN |
| 25-Jan-2017  | 07:00:00, | NaN |
| 25-Jan-2017  | 08:00:00, | NaN |
| 25-Jan-2017  | 09:00:00, | NaN |
| 25-Jan-2017  | 10:00:00, | NaN |
| 25-Jan-2017  | 11:00:00, | NaN |
| 25-Jan-2017  | 12:00:00, | NaN |
| 25-Jan-2017  | 13:00:00, | NaN |
| 25-Jan-2017  | 14:00:00, | NaN |
| 25-Jan-2017  | 15:00:00, | NaN |
| 25-Jan-2017  | 16:00:00, | NaN |
| 25-Jan-2017  | 17:00:00, | NaN |

25-Jan-2017 18:00:00, NaN  
25-Jan-2017 19:00:00, NaN  
25-Jan-2017 20:00:00, NaN  
25-Jan-2017 21:00:00, NaN  
25-Jan-2017 22:00:00, NaN  
25-Jan-2017 23:00:00, NaN  
26-Jan-2017, NaN  
26-Jan-2017 01:00:00, NaN  
26-Jan-2017 02:00:00, NaN  
26-Jan-2017 03:00:00, NaN  
26-Jan-2017 04:00:00, NaN  
26-Jan-2017 05:00:00, NaN  
26-Jan-2017 06:00:00, NaN  
26-Jan-2017 07:00:00, NaN  
26-Jan-2017 08:00:00, NaN  
26-Jan-2017 09:00:00, NaN  
26-Jan-2017 10:00:00, NaN  
26-Jan-2017 11:00:00, NaN  
26-Jan-2017 12:00:00, NaN  
26-Jan-2017 13:00:00, NaN  
26-Jan-2017 14:00:00, NaN  
26-Jan-2017 15:00:00, NaN  
26-Jan-2017 16:00:00, NaN  
26-Jan-2017 17:00:00, NaN  
26-Jan-2017 18:00:00, NaN  
26-Jan-2017 19:00:00, NaN  
26-Jan-2017 20:00:00, NaN  
26-Jan-2017 21:00:00, NaN  
26-Jan-2017 22:00:00, NaN  
26-Jan-2017 23:00:00, NaN  
27-Jan-2017, NaN  
27-Jan-2017 01:00:00, NaN  
27-Jan-2017 02:00:00, NaN  
27-Jan-2017 03:00:00, NaN  
27-Jan-2017 04:00:00, NaN  
27-Jan-2017 05:00:00, NaN  
27-Jan-2017 06:00:00, NaN  
27-Jan-2017 07:00:00, NaN  
27-Jan-2017 08:00:00, NaN  
27-Jan-2017 09:00:00, NaN  
27-Jan-2017 10:00:00, NaN  
27-Jan-2017 11:00:00, NaN  
27-Jan-2017 12:00:00, NaN  
27-Jan-2017 13:00:00, NaN  
27-Jan-2017 14:00:00, NaN  
27-Jan-2017 15:00:00, NaN  
27-Jan-2017 16:00:00, NaN  
27-Jan-2017 17:00:00, NaN  
27-Jan-2017 18:00:00, NaN  
27-Jan-2017 19:00:00, NaN  
27-Jan-2017 20:00:00, NaN  
27-Jan-2017 21:00:00, NaN  
27-Jan-2017 22:00:00, NaN  
27-Jan-2017 23:00:00, NaN  
28-Jan-2017, NaN  
28-Jan-2017 01:00:00, NaN  
28-Jan-2017 02:00:00, NaN  
28-Jan-2017 03:00:00, NaN  
28-Jan-2017 04:00:00, NaN  
28-Jan-2017 05:00:00, NaN  
28-Jan-2017 06:00:00, NaN  
28-Jan-2017 07:00:00, NaN  
28-Jan-2017 08:00:00, NaN  
28-Jan-2017 09:00:00, NaN

28-Jan-2017 10:00:00, NaN  
28-Jan-2017 11:00:00, NaN  
28-Jan-2017 12:00:00, NaN  
28-Jan-2017 13:00:00, NaN  
28-Jan-2017 14:00:00, NaN  
28-Jan-2017 15:00:00, NaN  
28-Jan-2017 16:00:00, NaN  
28-Jan-2017 17:00:00, NaN  
28-Jan-2017 18:00:00, NaN  
28-Jan-2017 19:00:00, NaN  
28-Jan-2017 20:00:00, NaN  
28-Jan-2017 21:00:00, NaN  
28-Jan-2017 22:00:00, NaN  
28-Jan-2017 23:00:00, NaN  
29-Jan-2017, NaN  
29-Jan-2017 01:00:00, NaN  
29-Jan-2017 02:00:00, NaN  
29-Jan-2017 03:00:00, NaN  
29-Jan-2017 04:00:00, NaN  
29-Jan-2017 05:00:00, NaN  
29-Jan-2017 06:00:00, NaN  
29-Jan-2017 07:00:00, NaN  
29-Jan-2017 08:00:00, NaN  
29-Jan-2017 09:00:00, NaN  
29-Jan-2017 10:00:00, NaN  
29-Jan-2017 11:00:00, NaN  
29-Jan-2017 12:00:00, NaN  
29-Jan-2017 13:00:00, NaN  
29-Jan-2017 14:00:00, NaN  
29-Jan-2017 15:00:00, NaN  
29-Jan-2017 16:00:00, NaN  
29-Jan-2017 17:00:00, NaN  
29-Jan-2017 18:00:00, NaN  
29-Jan-2017 19:00:00, NaN  
29-Jan-2017 20:00:00, NaN  
29-Jan-2017 21:00:00, NaN  
29-Jan-2017 22:00:00, NaN  
29-Jan-2017 23:00:00, NaN  
30-Jan-2017, NaN  
30-Jan-2017 01:00:00, NaN  
30-Jan-2017 02:00:00, NaN  
30-Jan-2017 03:00:00, NaN  
30-Jan-2017 04:00:00, NaN  
30-Jan-2017 05:00:00, NaN  
30-Jan-2017 06:00:00, NaN  
30-Jan-2017 07:00:00, NaN  
30-Jan-2017 08:00:00, NaN  
30-Jan-2017 09:00:00, NaN  
30-Jan-2017 10:00:00, NaN  
30-Jan-2017 11:00:00, NaN  
30-Jan-2017 12:00:00, NaN  
30-Jan-2017 13:00:00, NaN  
30-Jan-2017 14:00:00, NaN  
30-Jan-2017 15:00:00, NaN  
30-Jan-2017 16:00:00, NaN  
30-Jan-2017 17:00:00, NaN  
30-Jan-2017 18:00:00, NaN  
30-Jan-2017 19:00:00, NaN  
30-Jan-2017 20:00:00, NaN  
30-Jan-2017 21:00:00, NaN  
30-Jan-2017 22:00:00, NaN  
30-Jan-2017 23:00:00, NaN  
31-Jan-2017, NaN  
31-Jan-2017 01:00:00, NaN

|              |           |     |
|--------------|-----------|-----|
| 31-Jan-2017  | 02:00:00, | NaN |
| 31-Jan-2017  | 03:00:00, | NaN |
| 31-Jan-2017  | 04:00:00, | NaN |
| 31-Jan-2017  | 05:00:00, | NaN |
| 31-Jan-2017  | 06:00:00, | NaN |
| 31-Jan-2017  | 07:00:00, | NaN |
| 31-Jan-2017  | 08:00:00, | NaN |
| 31-Jan-2017  | 09:00:00, | NaN |
| 31-Jan-2017  | 10:00:00, | NaN |
| 31-Jan-2017  | 11:00:00, | NaN |
| 31-Jan-2017  | 12:00:00, | NaN |
| 31-Jan-2017  | 13:00:00, | NaN |
| 31-Jan-2017  | 14:00:00, | NaN |
| 31-Jan-2017  | 15:00:00, | NaN |
| 31-Jan-2017  | 16:00:00, | NaN |
| 31-Jan-2017  | 17:00:00, | NaN |
| 31-Jan-2017  | 18:00:00, | NaN |
| 31-Jan-2017  | 19:00:00, | NaN |
| 31-Jan-2017  | 20:00:00, | NaN |
| 31-Jan-2017  | 21:00:00, | NaN |
| 31-Jan-2017  | 22:00:00, | NaN |
| 31-Jan-2017  | 23:00:00, | NaN |
| 01-Feb-2017, | NaN       |     |
| 01-Feb-2017  | 01:00:00, | NaN |
| 01-Feb-2017  | 02:00:00, | NaN |
| 01-Feb-2017  | 03:00:00, | NaN |
| 01-Feb-2017  | 04:00:00, | NaN |
| 01-Feb-2017  | 05:00:00, | NaN |
| 01-Feb-2017  | 06:00:00, | NaN |
| 01-Feb-2017  | 07:00:00, | NaN |
| 01-Feb-2017  | 08:00:00, | NaN |
| 01-Feb-2017  | 09:00:00, | NaN |
| 01-Feb-2017  | 10:00:00, | NaN |
| 01-Feb-2017  | 11:00:00, | NaN |
| 01-Feb-2017  | 12:00:00, | NaN |
| 01-Feb-2017  | 13:00:00, | NaN |
| 01-Feb-2017  | 14:00:00, | NaN |
| 01-Feb-2017  | 15:00:00, | NaN |
| 01-Feb-2017  | 16:00:00, | NaN |
| 01-Feb-2017  | 17:00:00, | NaN |
| 01-Feb-2017  | 18:00:00, | NaN |
| 01-Feb-2017  | 19:00:00, | NaN |
| 01-Feb-2017  | 20:00:00, | NaN |
| 01-Feb-2017  | 21:00:00, | NaN |
| 01-Feb-2017  | 22:00:00, | NaN |
| 01-Feb-2017  | 23:00:00, | NaN |
| 02-Feb-2017, | NaN       |     |
| 02-Feb-2017  | 01:00:00, | NaN |
| 02-Feb-2017  | 02:00:00, | NaN |
| 02-Feb-2017  | 03:00:00, | NaN |
| 02-Feb-2017  | 04:00:00, | NaN |
| 02-Feb-2017  | 05:00:00, | NaN |
| 02-Feb-2017  | 06:00:00, | NaN |
| 02-Feb-2017  | 07:00:00, | NaN |
| 02-Feb-2017  | 08:00:00, | NaN |
| 02-Feb-2017  | 09:00:00, | NaN |
| 02-Feb-2017  | 10:00:00, | NaN |
| 02-Feb-2017  | 11:00:00, | NaN |
| 02-Feb-2017  | 12:00:00, | NaN |
| 02-Feb-2017  | 13:00:00, | NaN |
| 02-Feb-2017  | 14:00:00, | NaN |
| 02-Feb-2017  | 15:00:00, | NaN |
| 02-Feb-2017  | 16:00:00, | NaN |
| 02-Feb-2017  | 17:00:00, | NaN |

02-Feb-2017 18:00:00, NaN  
02-Feb-2017 19:00:00, NaN  
02-Feb-2017 20:00:00, NaN  
02-Feb-2017 21:00:00, NaN  
02-Feb-2017 22:00:00, NaN  
02-Feb-2017 23:00:00, NaN  
03-Feb-2017, NaN  
03-Feb-2017 01:00:00, NaN  
03-Feb-2017 02:00:00, NaN  
03-Feb-2017 03:00:00, NaN  
03-Feb-2017 04:00:00, NaN  
03-Feb-2017 05:00:00, NaN  
03-Feb-2017 06:00:00, NaN  
03-Feb-2017 07:00:00, NaN  
03-Feb-2017 08:00:00, NaN  
03-Feb-2017 09:00:00, NaN  
03-Feb-2017 10:00:00, NaN  
03-Feb-2017 11:00:00, NaN  
03-Feb-2017 12:00:00, NaN  
03-Feb-2017 13:00:00, NaN  
03-Feb-2017 14:00:00, NaN  
03-Feb-2017 15:00:00, NaN  
03-Feb-2017 16:00:00, NaN  
03-Feb-2017 17:00:00, NaN  
03-Feb-2017 18:00:00, NaN  
03-Feb-2017 19:00:00, NaN  
03-Feb-2017 20:00:00, NaN  
03-Feb-2017 21:00:00, NaN  
03-Feb-2017 22:00:00, NaN  
03-Feb-2017 23:00:00, NaN  
04-Feb-2017, NaN  
04-Feb-2017 01:00:00, NaN  
04-Feb-2017 02:00:00, NaN  
04-Feb-2017 03:00:00, NaN  
04-Feb-2017 04:00:00, NaN  
04-Feb-2017 05:00:00, NaN  
04-Feb-2017 06:00:00, NaN  
04-Feb-2017 07:00:00, NaN  
04-Feb-2017 08:00:00, NaN  
04-Feb-2017 09:00:00, NaN  
04-Feb-2017 10:00:00, NaN  
04-Feb-2017 11:00:00, NaN  
04-Feb-2017 12:00:00, NaN  
04-Feb-2017 13:00:00, NaN  
04-Feb-2017 14:00:00, NaN  
04-Feb-2017 15:00:00, NaN  
04-Feb-2017 16:00:00, NaN  
04-Feb-2017 17:00:00, NaN  
04-Feb-2017 18:00:00, NaN  
04-Feb-2017 19:00:00, NaN  
04-Feb-2017 20:00:00, NaN  
04-Feb-2017 21:00:00, NaN  
04-Feb-2017 22:00:00, NaN  
04-Feb-2017 23:00:00, NaN  
05-Feb-2017, NaN  
05-Feb-2017 01:00:00, NaN  
05-Feb-2017 02:00:00, NaN  
05-Feb-2017 03:00:00, NaN  
05-Feb-2017 04:00:00, NaN  
05-Feb-2017 05:00:00, NaN  
05-Feb-2017 06:00:00, NaN  
05-Feb-2017 07:00:00, NaN  
05-Feb-2017 08:00:00, NaN  
05-Feb-2017 09:00:00, NaN



05-Feb-2017 10:00:00, NaN  
05-Feb-2017 11:00:00, NaN  
05-Feb-2017 12:00:00, NaN  
05-Feb-2017 13:00:00, NaN  
05-Feb-2017 14:00:00, NaN  
05-Feb-2017 15:00:00, NaN  
05-Feb-2017 16:00:00, NaN  
05-Feb-2017 17:00:00, NaN  
05-Feb-2017 18:00:00, NaN  
05-Feb-2017 19:00:00, NaN  
05-Feb-2017 20:00:00, NaN  
05-Feb-2017 21:00:00, NaN  
05-Feb-2017 22:00:00, NaN  
05-Feb-2017 23:00:00, NaN  
06-Feb-2017, NaN  
06-Feb-2017 01:00:00, NaN  
06-Feb-2017 02:00:00, NaN  
06-Feb-2017 03:00:00, NaN  
06-Feb-2017 04:00:00, NaN  
06-Feb-2017 05:00:00, NaN  
06-Feb-2017 06:00:00, NaN  
06-Feb-2017 07:00:00, NaN  
06-Feb-2017 08:00:00, NaN  
06-Feb-2017 09:00:00, NaN  
06-Feb-2017 10:00:00, NaN  
06-Feb-2017 11:00:00, NaN  
06-Feb-2017 12:00:00, NaN  
06-Feb-2017 13:00:00, NaN  
06-Feb-2017 14:00:00, NaN  
06-Feb-2017 15:00:00, NaN  
06-Feb-2017 16:00:00, NaN  
06-Feb-2017 17:00:00, NaN  
06-Feb-2017 18:00:00, NaN  
06-Feb-2017 19:00:00, NaN  
06-Feb-2017 20:00:00, NaN  
06-Feb-2017 21:00:00, NaN  
06-Feb-2017 22:00:00, NaN  
06-Feb-2017 23:00:00, NaN  
07-Feb-2017, NaN  
07-Feb-2017 01:00:00, NaN  
07-Feb-2017 02:00:00, NaN  
07-Feb-2017 03:00:00, NaN  
07-Feb-2017 04:00:00, NaN  
07-Feb-2017 05:00:00, NaN  
07-Feb-2017 06:00:00, NaN  
07-Feb-2017 07:00:00, NaN  
07-Feb-2017 08:00:00, NaN  
07-Feb-2017 09:00:00, NaN  
07-Feb-2017 10:00:00, NaN  
07-Feb-2017 11:00:00, NaN  
07-Feb-2017 12:00:00, NaN  
07-Feb-2017 13:00:00, NaN  
07-Feb-2017 14:00:00, NaN  
07-Feb-2017 15:00:00, NaN  
07-Feb-2017 16:00:00, NaN  
07-Feb-2017 17:00:00, NaN  
07-Feb-2017 18:00:00, NaN  
07-Feb-2017 19:00:00, NaN  
07-Feb-2017 20:00:00, NaN  
07-Feb-2017 21:00:00, NaN  
07-Feb-2017 22:00:00, NaN  
07-Feb-2017 23:00:00, NaN  
08-Feb-2017, NaN  
08-Feb-2017 01:00:00, NaN

08-Feb-2017 02:00:00, NaN  
08-Feb-2017 03:00:00, NaN  
08-Feb-2017 04:00:00, NaN  
08-Feb-2017 05:00:00, NaN  
08-Feb-2017 06:00:00, NaN  
08-Feb-2017 07:00:00, NaN  
08-Feb-2017 08:00:00, NaN  
08-Feb-2017 09:00:00, NaN  
08-Feb-2017 10:00:00, NaN  
08-Feb-2017 11:00:00, NaN  
08-Feb-2017 12:00:00, NaN  
08-Feb-2017 13:00:00, NaN  
08-Feb-2017 14:00:00, NaN  
08-Feb-2017 15:00:00, NaN  
08-Feb-2017 16:00:00, NaN  
08-Feb-2017 17:00:00, NaN  
08-Feb-2017 18:00:00, NaN  
08-Feb-2017 19:00:00, NaN  
08-Feb-2017 20:00:00, NaN  
08-Feb-2017 21:00:00, NaN  
08-Feb-2017 22:00:00, NaN  
08-Feb-2017 23:00:00, NaN  
09-Feb-2017, NaN  
09-Feb-2017 01:00:00, NaN  
09-Feb-2017 02:00:00, NaN  
09-Feb-2017 03:00:00, NaN  
09-Feb-2017 04:00:00, NaN  
09-Feb-2017 05:00:00, NaN  
09-Feb-2017 06:00:00, NaN  
09-Feb-2017 07:00:00, NaN  
09-Feb-2017 08:00:00, NaN  
09-Feb-2017 09:00:00, NaN  
09-Feb-2017 10:00:00, NaN  
09-Feb-2017 11:00:00, NaN  
09-Feb-2017 12:00:00, NaN  
09-Feb-2017 13:00:00, NaN  
09-Feb-2017 14:00:00, NaN  
09-Feb-2017 15:00:00, NaN  
09-Feb-2017 16:00:00, NaN  
09-Feb-2017 17:00:00, NaN  
09-Feb-2017 18:00:00, NaN  
09-Feb-2017 19:00:00, NaN  
09-Feb-2017 20:00:00, NaN  
09-Feb-2017 21:00:00, NaN  
09-Feb-2017 22:00:00, NaN  
09-Feb-2017 23:00:00, NaN  
10-Feb-2017, NaN  
10-Feb-2017 01:00:00, NaN  
10-Feb-2017 02:00:00, NaN  
10-Feb-2017 03:00:00, NaN  
10-Feb-2017 04:00:00, NaN  
10-Feb-2017 05:00:00, NaN  
10-Feb-2017 06:00:00, NaN  
10-Feb-2017 07:00:00, NaN  
10-Feb-2017 08:00:00, NaN  
10-Feb-2017 09:00:00, NaN  
10-Feb-2017 10:00:00, NaN  
10-Feb-2017 11:00:00, NaN  
10-Feb-2017 12:00:00, NaN  
10-Feb-2017 13:00:00, NaN  
10-Feb-2017 14:00:00, NaN  
10-Feb-2017 15:00:00, NaN  
10-Feb-2017 16:00:00, NaN  
10-Feb-2017 17:00:00, NaN

10-Feb-2017 18:00:00, NaN  
10-Feb-2017 19:00:00, NaN  
10-Feb-2017 20:00:00, NaN  
10-Feb-2017 21:00:00, NaN  
10-Feb-2017 22:00:00, NaN  
10-Feb-2017 23:00:00, NaN  
11-Feb-2017, NaN  
11-Feb-2017 01:00:00, NaN  
11-Feb-2017 02:00:00, NaN  
11-Feb-2017 03:00:00, NaN  
11-Feb-2017 04:00:00, NaN  
11-Feb-2017 05:00:00, NaN  
11-Feb-2017 06:00:00, NaN  
11-Feb-2017 07:00:00, NaN  
11-Feb-2017 08:00:00, NaN  
11-Feb-2017 09:00:00, NaN  
11-Feb-2017 10:00:00, NaN  
11-Feb-2017 11:00:00, NaN  
11-Feb-2017 12:00:00, NaN  
11-Feb-2017 13:00:00, NaN  
11-Feb-2017 14:00:00, NaN  
11-Feb-2017 15:00:00, NaN  
11-Feb-2017 16:00:00, NaN  
11-Feb-2017 17:00:00, NaN  
11-Feb-2017 18:00:00, NaN  
11-Feb-2017 19:00:00, NaN  
11-Feb-2017 20:00:00, NaN  
11-Feb-2017 21:00:00, NaN  
11-Feb-2017 22:00:00, NaN  
11-Feb-2017 23:00:00, NaN  
12-Feb-2017, NaN  
12-Feb-2017 01:00:00, NaN  
12-Feb-2017 02:00:00, NaN  
12-Feb-2017 03:00:00, NaN  
12-Feb-2017 04:00:00, NaN  
12-Feb-2017 05:00:00, NaN  
12-Feb-2017 06:00:00, NaN  
12-Feb-2017 07:00:00, NaN  
12-Feb-2017 08:00:00, NaN  
12-Feb-2017 09:00:00, NaN  
12-Feb-2017 10:00:00, NaN  
12-Feb-2017 11:00:00, NaN  
12-Feb-2017 12:00:00, NaN  
12-Feb-2017 13:00:00, NaN  
12-Feb-2017 14:00:00, NaN  
12-Feb-2017 15:00:00, NaN  
12-Feb-2017 16:00:00, NaN  
12-Feb-2017 17:00:00, NaN  
12-Feb-2017 18:00:00, NaN  
12-Feb-2017 19:00:00, NaN  
12-Feb-2017 20:00:00, NaN  
12-Feb-2017 21:00:00, NaN  
12-Feb-2017 22:00:00, NaN  
12-Feb-2017 23:00:00, NaN  
13-Feb-2017, NaN  
13-Feb-2017 01:00:00, NaN  
13-Feb-2017 02:00:00, NaN  
13-Feb-2017 03:00:00, NaN  
13-Feb-2017 04:00:00, NaN  
13-Feb-2017 05:00:00, NaN  
13-Feb-2017 06:00:00, NaN  
13-Feb-2017 07:00:00, NaN  
13-Feb-2017 08:00:00, NaN  
13-Feb-2017 09:00:00, NaN

13-Feb-2017 10:00:00, NaN  
13-Feb-2017 11:00:00, NaN  
13-Feb-2017 12:00:00, NaN  
13-Feb-2017 13:00:00, NaN  
13-Feb-2017 14:00:00, NaN  
13-Feb-2017 15:00:00, NaN  
13-Feb-2017 16:00:00, NaN  
13-Feb-2017 17:00:00, NaN  
13-Feb-2017 18:00:00, NaN  
13-Feb-2017 19:00:00, NaN  
13-Feb-2017 20:00:00, NaN  
13-Feb-2017 21:00:00, NaN  
13-Feb-2017 22:00:00, NaN  
13-Feb-2017 23:00:00, NaN  
14-Feb-2017, NaN  
14-Feb-2017 01:00:00, NaN  
14-Feb-2017 02:00:00, NaN  
14-Feb-2017 03:00:00, NaN  
14-Feb-2017 04:00:00, NaN  
14-Feb-2017 05:00:00, NaN  
14-Feb-2017 06:00:00, NaN  
14-Feb-2017 07:00:00, NaN  
14-Feb-2017 08:00:00, NaN  
14-Feb-2017 09:00:00, NaN  
14-Feb-2017 10:00:00, NaN  
14-Feb-2017 11:00:00, NaN  
14-Feb-2017 12:00:00, NaN  
14-Feb-2017 13:00:00, NaN  
14-Feb-2017 14:00:00, NaN  
14-Feb-2017 15:00:00, NaN  
14-Feb-2017 16:00:00, NaN  
14-Feb-2017 17:00:00, NaN  
14-Feb-2017 18:00:00, NaN  
14-Feb-2017 19:00:00, NaN  
14-Feb-2017 20:00:00, NaN  
14-Feb-2017 21:00:00, NaN  
14-Feb-2017 22:00:00, NaN  
14-Feb-2017 23:00:00, NaN  
15-Feb-2017, NaN  
15-Feb-2017 01:00:00, NaN  
15-Feb-2017 02:00:00, NaN  
15-Feb-2017 03:00:00, NaN  
15-Feb-2017 04:00:00, NaN  
15-Feb-2017 05:00:00, NaN  
15-Feb-2017 06:00:00, NaN  
15-Feb-2017 07:00:00, NaN  
15-Feb-2017 08:00:00, NaN  
15-Feb-2017 09:00:00, NaN  
15-Feb-2017 10:00:00, NaN  
15-Feb-2017 11:00:00, NaN  
15-Feb-2017 12:00:00, NaN  
15-Feb-2017 13:00:00, NaN  
15-Feb-2017 14:00:00, NaN  
15-Feb-2017 15:00:00, NaN  
15-Feb-2017 16:00:00, NaN  
15-Feb-2017 17:00:00, NaN  
15-Feb-2017 18:00:00, NaN  
15-Feb-2017 19:00:00, NaN  
15-Feb-2017 20:00:00, NaN  
15-Feb-2017 21:00:00, NaN  
15-Feb-2017 22:00:00, NaN  
15-Feb-2017 23:00:00, NaN  
16-Feb-2017, NaN  
16-Feb-2017 01:00:00, NaN

16-Feb-2017 02:00:00, NaN  
16-Feb-2017 03:00:00, NaN  
16-Feb-2017 04:00:00, NaN  
16-Feb-2017 05:00:00, NaN  
16-Feb-2017 06:00:00, NaN  
16-Feb-2017 07:00:00, NaN  
16-Feb-2017 08:00:00, NaN  
16-Feb-2017 09:00:00, NaN  
16-Feb-2017 10:00:00, NaN  
16-Feb-2017 11:00:00, NaN  
16-Feb-2017 12:00:00, NaN  
16-Feb-2017 13:00:00, NaN  
16-Feb-2017 14:00:00, NaN  
16-Feb-2017 15:00:00, NaN  
16-Feb-2017 16:00:00, NaN  
16-Feb-2017 17:00:00, NaN  
16-Feb-2017 18:00:00, NaN  
16-Feb-2017 19:00:00, NaN  
16-Feb-2017 20:00:00, NaN  
16-Feb-2017 21:00:00, NaN  
16-Feb-2017 22:00:00, NaN  
16-Feb-2017 23:00:00, NaN  
17-Feb-2017, NaN  
17-Feb-2017 01:00:00, NaN  
17-Feb-2017 02:00:00, NaN  
17-Feb-2017 03:00:00, NaN  
17-Feb-2017 04:00:00, NaN  
17-Feb-2017 05:00:00, NaN  
17-Feb-2017 06:00:00, NaN  
17-Feb-2017 07:00:00, NaN  
17-Feb-2017 08:00:00, NaN  
17-Feb-2017 09:00:00, NaN  
17-Feb-2017 10:00:00, NaN  
17-Feb-2017 11:00:00, NaN  
17-Feb-2017 12:00:00, NaN  
17-Feb-2017 13:00:00, NaN  
17-Feb-2017 14:00:00, NaN  
17-Feb-2017 15:00:00, NaN  
17-Feb-2017 16:00:00, NaN  
17-Feb-2017 17:00:00, NaN  
17-Feb-2017 18:00:00, NaN  
17-Feb-2017 19:00:00, NaN  
17-Feb-2017 20:00:00, NaN  
17-Feb-2017 21:00:00, NaN  
17-Feb-2017 22:00:00, NaN  
17-Feb-2017 23:00:00, NaN  
18-Feb-2017, NaN  
18-Feb-2017 01:00:00, NaN  
18-Feb-2017 02:00:00, NaN  
18-Feb-2017 03:00:00, NaN  
18-Feb-2017 04:00:00, NaN  
18-Feb-2017 05:00:00, NaN  
18-Feb-2017 06:00:00, NaN  
18-Feb-2017 07:00:00, NaN  
18-Feb-2017 08:00:00, NaN  
18-Feb-2017 09:00:00, NaN  
18-Feb-2017 10:00:00, NaN  
18-Feb-2017 11:00:00, NaN  
18-Feb-2017 12:00:00, NaN  
18-Feb-2017 13:00:00, NaN  
18-Feb-2017 14:00:00, NaN  
18-Feb-2017 15:00:00, NaN  
18-Feb-2017 16:00:00, NaN  
18-Feb-2017 17:00:00, NaN

18-Feb-2017 18:00:00, NaN  
18-Feb-2017 19:00:00, NaN  
18-Feb-2017 20:00:00, NaN  
18-Feb-2017 21:00:00, NaN  
18-Feb-2017 22:00:00, NaN  
18-Feb-2017 23:00:00, NaN  
19-Feb-2017, NaN  
19-Feb-2017 01:00:00, NaN  
19-Feb-2017 02:00:00, NaN  
19-Feb-2017 03:00:00, NaN  
19-Feb-2017 04:00:00, NaN  
19-Feb-2017 05:00:00, NaN  
19-Feb-2017 06:00:00, NaN  
19-Feb-2017 07:00:00, NaN  
19-Feb-2017 08:00:00, NaN  
19-Feb-2017 09:00:00, NaN  
19-Feb-2017 10:00:00, NaN  
19-Feb-2017 11:00:00, NaN  
19-Feb-2017 12:00:00, NaN  
19-Feb-2017 13:00:00, NaN  
19-Feb-2017 14:00:00, NaN  
19-Feb-2017 15:00:00, NaN  
19-Feb-2017 16:00:00, NaN  
19-Feb-2017 17:00:00, NaN  
19-Feb-2017 18:00:00, NaN  
19-Feb-2017 19:00:00, NaN  
19-Feb-2017 20:00:00, NaN  
19-Feb-2017 21:00:00, NaN  
19-Feb-2017 22:00:00, NaN  
19-Feb-2017 23:00:00, NaN  
20-Feb-2017, NaN  
20-Feb-2017 01:00:00, NaN  
20-Feb-2017 02:00:00, NaN  
20-Feb-2017 03:00:00, NaN  
20-Feb-2017 04:00:00, NaN  
20-Feb-2017 05:00:00, NaN  
20-Feb-2017 06:00:00, NaN  
20-Feb-2017 07:00:00, NaN  
20-Feb-2017 08:00:00, NaN  
20-Feb-2017 09:00:00, NaN  
20-Feb-2017 10:00:00, NaN  
20-Feb-2017 11:00:00, NaN  
20-Feb-2017 12:00:00, NaN  
20-Feb-2017 13:00:00, NaN  
20-Feb-2017 14:00:00, NaN  
20-Feb-2017 15:00:00, NaN  
20-Feb-2017 16:00:00, NaN  
20-Feb-2017 17:00:00, NaN  
20-Feb-2017 18:00:00, NaN  
20-Feb-2017 19:00:00, NaN  
20-Feb-2017 20:00:00, NaN  
20-Feb-2017 21:00:00, NaN  
20-Feb-2017 22:00:00, NaN  
20-Feb-2017 23:00:00, NaN  
21-Feb-2017, NaN  
21-Feb-2017 01:00:00, NaN  
21-Feb-2017 02:00:00, NaN  
21-Feb-2017 03:00:00, NaN  
21-Feb-2017 04:00:00, NaN  
21-Feb-2017 05:00:00, NaN  
21-Feb-2017 06:00:00, NaN  
21-Feb-2017 07:00:00, NaN  
21-Feb-2017 08:00:00, NaN  
21-Feb-2017 09:00:00, NaN

21-Feb-2017 10:00:00, NaN  
21-Feb-2017 11:00:00, NaN  
21-Feb-2017 12:00:00, NaN  
21-Feb-2017 13:00:00, NaN  
21-Feb-2017 14:00:00, NaN  
21-Feb-2017 15:00:00, NaN  
21-Feb-2017 16:00:00, NaN  
21-Feb-2017 17:00:00, NaN  
21-Feb-2017 18:00:00, NaN  
21-Feb-2017 19:00:00, NaN  
21-Feb-2017 20:00:00, NaN  
21-Feb-2017 21:00:00, NaN  
21-Feb-2017 22:00:00, NaN  
21-Feb-2017 23:00:00, NaN  
22-Feb-2017, NaN  
22-Feb-2017 01:00:00, NaN  
22-Feb-2017 02:00:00, NaN  
22-Feb-2017 03:00:00, NaN  
22-Feb-2017 04:00:00, NaN  
22-Feb-2017 05:00:00, NaN  
22-Feb-2017 06:00:00, NaN  
22-Feb-2017 07:00:00, NaN  
22-Feb-2017 08:00:00, NaN  
22-Feb-2017 09:00:00, NaN  
22-Feb-2017 10:00:00, NaN  
22-Feb-2017 11:00:00, NaN  
22-Feb-2017 12:00:00, NaN  
22-Feb-2017 13:00:00, NaN  
22-Feb-2017 14:00:00, NaN  
22-Feb-2017 15:00:00, NaN  
22-Feb-2017 16:00:00, NaN  
22-Feb-2017 17:00:00, NaN  
22-Feb-2017 18:00:00, NaN  
22-Feb-2017 19:00:00, NaN  
22-Feb-2017 20:00:00, NaN  
22-Feb-2017 21:00:00, NaN  
22-Feb-2017 22:00:00, NaN  
22-Feb-2017 23:00:00, NaN  
23-Feb-2017, NaN  
23-Feb-2017 01:00:00, NaN  
23-Feb-2017 02:00:00, NaN  
23-Feb-2017 03:00:00, NaN  
23-Feb-2017 04:00:00, NaN  
23-Feb-2017 05:00:00, NaN  
23-Feb-2017 06:00:00, NaN  
23-Feb-2017 07:00:00, NaN  
23-Feb-2017 08:00:00, NaN  
23-Feb-2017 09:00:00, NaN  
23-Feb-2017 10:00:00, NaN  
23-Feb-2017 11:00:00, NaN  
23-Feb-2017 12:00:00, NaN  
23-Feb-2017 13:00:00, NaN  
23-Feb-2017 14:00:00, NaN  
23-Feb-2017 15:00:00, NaN  
23-Feb-2017 16:00:00, NaN  
23-Feb-2017 17:00:00, NaN  
23-Feb-2017 18:00:00, NaN  
23-Feb-2017 19:00:00, NaN  
23-Feb-2017 20:00:00, NaN  
23-Feb-2017 21:00:00, NaN  
23-Feb-2017 22:00:00, NaN  
23-Feb-2017 23:00:00, NaN  
24-Feb-2017, NaN  
24-Feb-2017 01:00:00, NaN

24-Feb-2017 02:00:00, NaN  
24-Feb-2017 03:00:00, NaN  
24-Feb-2017 04:00:00, NaN  
24-Feb-2017 05:00:00, NaN  
24-Feb-2017 06:00:00, NaN  
24-Feb-2017 07:00:00, NaN  
24-Feb-2017 08:00:00, NaN  
24-Feb-2017 09:00:00, NaN  
24-Feb-2017 10:00:00, NaN  
24-Feb-2017 11:00:00, NaN  
24-Feb-2017 12:00:00, NaN  
24-Feb-2017 13:00:00, NaN  
24-Feb-2017 14:00:00, NaN  
24-Feb-2017 15:00:00, NaN  
24-Feb-2017 16:00:00, NaN  
24-Feb-2017 17:00:00, NaN  
24-Feb-2017 18:00:00, NaN  
24-Feb-2017 19:00:00, NaN  
24-Feb-2017 20:00:00, NaN  
24-Feb-2017 21:00:00, NaN  
24-Feb-2017 22:00:00, NaN  
24-Feb-2017 23:00:00, NaN  
25-Feb-2017, NaN  
25-Feb-2017 01:00:00, NaN  
25-Feb-2017 02:00:00, NaN  
25-Feb-2017 03:00:00, NaN  
25-Feb-2017 04:00:00, NaN  
25-Feb-2017 05:00:00, NaN  
25-Feb-2017 06:00:00, NaN  
25-Feb-2017 07:00:00, NaN  
25-Feb-2017 08:00:00, NaN  
25-Feb-2017 09:00:00, NaN  
25-Feb-2017 10:00:00, NaN  
25-Feb-2017 11:00:00, NaN  
25-Feb-2017 12:00:00, NaN  
25-Feb-2017 13:00:00, NaN  
25-Feb-2017 14:00:00, NaN  
25-Feb-2017 15:00:00, NaN  
25-Feb-2017 16:00:00, NaN  
25-Feb-2017 17:00:00, NaN  
25-Feb-2017 18:00:00, NaN  
25-Feb-2017 19:00:00, NaN  
25-Feb-2017 20:00:00, NaN  
25-Feb-2017 21:00:00, NaN  
25-Feb-2017 22:00:00, NaN  
25-Feb-2017 23:00:00, NaN  
26-Feb-2017, NaN  
26-Feb-2017 01:00:00, NaN  
26-Feb-2017 02:00:00, NaN  
26-Feb-2017 03:00:00, NaN  
26-Feb-2017 04:00:00, NaN  
26-Feb-2017 05:00:00, NaN  
26-Feb-2017 06:00:00, NaN  
26-Feb-2017 07:00:00, NaN  
26-Feb-2017 08:00:00, NaN  
26-Feb-2017 09:00:00, NaN  
26-Feb-2017 10:00:00, NaN  
26-Feb-2017 11:00:00, NaN  
26-Feb-2017 12:00:00, NaN  
26-Feb-2017 13:00:00, NaN  
26-Feb-2017 14:00:00, NaN  
26-Feb-2017 15:00:00, NaN  
26-Feb-2017 16:00:00, NaN  
26-Feb-2017 17:00:00, NaN



26-Feb-2017 18:00:00, NaN  
26-Feb-2017 19:00:00, NaN  
26-Feb-2017 20:00:00, NaN  
26-Feb-2017 21:00:00, NaN  
26-Feb-2017 22:00:00, NaN  
26-Feb-2017 23:00:00, NaN  
27-Feb-2017, NaN  
27-Feb-2017 01:00:00, NaN  
27-Feb-2017 02:00:00, NaN  
27-Feb-2017 03:00:00, NaN  
27-Feb-2017 04:00:00, NaN  
27-Feb-2017 05:00:00, NaN  
27-Feb-2017 06:00:00, NaN  
27-Feb-2017 07:00:00, NaN  
27-Feb-2017 08:00:00, NaN  
27-Feb-2017 09:00:00, NaN  
27-Feb-2017 10:00:00, NaN  
27-Feb-2017 11:00:00, NaN  
27-Feb-2017 12:00:00, NaN  
27-Feb-2017 13:00:00, NaN  
27-Feb-2017 14:00:00, NaN  
27-Feb-2017 15:00:00, NaN  
27-Feb-2017 16:00:00, NaN  
27-Feb-2017 17:00:00, NaN  
27-Feb-2017 18:00:00, NaN  
27-Feb-2017 19:00:00, NaN  
27-Feb-2017 20:00:00, NaN  
27-Feb-2017 21:00:00, NaN  
27-Feb-2017 22:00:00, NaN  
27-Feb-2017 23:00:00, NaN  
28-Feb-2017, NaN  
28-Feb-2017 01:00:00, NaN  
28-Feb-2017 02:00:00, NaN  
28-Feb-2017 03:00:00, NaN  
28-Feb-2017 04:00:00, NaN  
28-Feb-2017 05:00:00, NaN  
28-Feb-2017 06:00:00, NaN  
28-Feb-2017 07:00:00, NaN  
28-Feb-2017 08:00:00, NaN  
28-Feb-2017 09:00:00, NaN  
28-Feb-2017 10:00:00, NaN  
28-Feb-2017 11:00:00, NaN  
28-Feb-2017 12:00:00, NaN  
28-Feb-2017 13:00:00, NaN  
28-Feb-2017 14:00:00, NaN  
28-Feb-2017 15:00:00, NaN  
28-Feb-2017 16:00:00, NaN  
28-Feb-2017 17:00:00, NaN  
28-Feb-2017 18:00:00, NaN  
28-Feb-2017 19:00:00, NaN  
28-Feb-2017 20:00:00, NaN  
28-Feb-2017 21:00:00, NaN  
28-Feb-2017 22:00:00, NaN  
28-Feb-2017 23:00:00, NaN  
01-Mar-2017, NaN  
01-Mar-2017 01:00:00, NaN  
01-Mar-2017 02:00:00, NaN  
01-Mar-2017 03:00:00, NaN  
01-Mar-2017 04:00:00, NaN  
01-Mar-2017 05:00:00, NaN  
01-Mar-2017 06:00:00, NaN  
01-Mar-2017 07:00:00, NaN  
01-Mar-2017 08:00:00, NaN  
01-Mar-2017 09:00:00, NaN

01-Mar-2017 10:00:00, NaN  
01-Mar-2017 11:00:00, NaN  
01-Mar-2017 12:00:00, NaN  
01-Mar-2017 13:00:00, NaN  
01-Mar-2017 14:00:00, NaN  
01-Mar-2017 15:00:00, NaN  
01-Mar-2017 16:00:00, NaN  
01-Mar-2017 17:00:00, NaN  
01-Mar-2017 18:00:00, NaN  
01-Mar-2017 19:00:00, NaN  
01-Mar-2017 20:00:00, NaN  
01-Mar-2017 21:00:00, NaN  
01-Mar-2017 22:00:00, NaN  
01-Mar-2017 23:00:00, NaN  
02-Mar-2017, NaN  
02-Mar-2017 01:00:00, NaN  
02-Mar-2017 02:00:00, NaN  
02-Mar-2017 03:00:00, NaN  
02-Mar-2017 04:00:00, NaN  
02-Mar-2017 05:00:00, NaN  
02-Mar-2017 06:00:00, NaN  
02-Mar-2017 07:00:00, NaN  
02-Mar-2017 08:00:00, NaN  
02-Mar-2017 09:00:00, NaN  
02-Mar-2017 10:00:00, NaN  
02-Mar-2017 11:00:00, NaN  
02-Mar-2017 12:00:00, NaN  
02-Mar-2017 13:00:00, NaN  
02-Mar-2017 14:00:00, NaN  
02-Mar-2017 15:00:00, NaN  
02-Mar-2017 16:00:00, NaN  
02-Mar-2017 17:00:00, NaN  
02-Mar-2017 18:00:00, NaN  
02-Mar-2017 19:00:00, NaN  
02-Mar-2017 20:00:00, NaN  
02-Mar-2017 21:00:00, NaN  
02-Mar-2017 22:00:00, NaN  
02-Mar-2017 23:00:00, NaN  
03-Mar-2017, NaN  
03-Mar-2017 01:00:00, NaN  
03-Mar-2017 02:00:00, NaN  
03-Mar-2017 03:00:00, NaN  
03-Mar-2017 04:00:00, NaN  
03-Mar-2017 05:00:00, NaN  
03-Mar-2017 06:00:00, NaN  
03-Mar-2017 07:00:00, NaN  
03-Mar-2017 08:00:00, NaN  
03-Mar-2017 09:00:00, NaN  
03-Mar-2017 10:00:00, NaN  
03-Mar-2017 11:00:00, NaN  
03-Mar-2017 12:00:00, NaN  
03-Mar-2017 13:00:00, NaN  
03-Mar-2017 14:00:00, NaN  
03-Mar-2017 15:00:00, NaN  
03-Mar-2017 16:00:00, NaN  
03-Mar-2017 17:00:00, NaN  
03-Mar-2017 18:00:00, NaN  
03-Mar-2017 19:00:00, NaN  
03-Mar-2017 20:00:00, NaN  
03-Mar-2017 21:00:00, NaN  
03-Mar-2017 22:00:00, NaN  
03-Mar-2017 23:00:00, NaN  
04-Mar-2017, NaN  
04-Mar-2017 01:00:00, NaN

|              |           |     |
|--------------|-----------|-----|
| 04-Mar-2017  | 02:00:00, | NaN |
| 04-Mar-2017  | 03:00:00, | NaN |
| 04-Mar-2017  | 04:00:00, | NaN |
| 04-Mar-2017  | 05:00:00, | NaN |
| 04-Mar-2017  | 06:00:00, | NaN |
| 04-Mar-2017  | 07:00:00, | NaN |
| 04-Mar-2017  | 08:00:00, | NaN |
| 04-Mar-2017  | 09:00:00, | NaN |
| 04-Mar-2017  | 10:00:00, | NaN |
| 04-Mar-2017  | 11:00:00, | NaN |
| 04-Mar-2017  | 12:00:00, | NaN |
| 04-Mar-2017  | 13:00:00, | NaN |
| 04-Mar-2017  | 14:00:00, | NaN |
| 04-Mar-2017  | 15:00:00, | NaN |
| 04-Mar-2017  | 16:00:00, | NaN |
| 04-Mar-2017  | 17:00:00, | NaN |
| 04-Mar-2017  | 18:00:00, | NaN |
| 04-Mar-2017  | 19:00:00, | NaN |
| 04-Mar-2017  | 20:00:00, | NaN |
| 04-Mar-2017  | 21:00:00, | NaN |
| 04-Mar-2017  | 22:00:00, | NaN |
| 04-Mar-2017  | 23:00:00, | NaN |
| 05-Mar-2017, | NaN       |     |
| 05-Mar-2017  | 01:00:00, | NaN |
| 05-Mar-2017  | 02:00:00, | NaN |
| 05-Mar-2017  | 03:00:00, | NaN |
| 05-Mar-2017  | 04:00:00, | NaN |
| 05-Mar-2017  | 05:00:00, | NaN |
| 05-Mar-2017  | 06:00:00, | NaN |
| 05-Mar-2017  | 07:00:00, | NaN |
| 05-Mar-2017  | 08:00:00, | NaN |
| 05-Mar-2017  | 09:00:00, | NaN |
| 05-Mar-2017  | 10:00:00, | NaN |
| 05-Mar-2017  | 11:00:00, | NaN |
| 05-Mar-2017  | 12:00:00, | NaN |
| 05-Mar-2017  | 13:00:00, | NaN |
| 05-Mar-2017  | 14:00:00, | NaN |
| 05-Mar-2017  | 15:00:00, | NaN |
| 05-Mar-2017  | 16:00:00, | NaN |
| 05-Mar-2017  | 17:00:00, | NaN |
| 05-Mar-2017  | 18:00:00, | NaN |
| 05-Mar-2017  | 19:00:00, | NaN |
| 05-Mar-2017  | 20:00:00, | NaN |
| 05-Mar-2017  | 21:00:00, | NaN |
| 05-Mar-2017  | 22:00:00, | NaN |
| 05-Mar-2017  | 23:00:00, | NaN |
| 06-Mar-2017, | NaN       |     |
| 06-Mar-2017  | 01:00:00, | NaN |
| 06-Mar-2017  | 02:00:00, | NaN |
| 06-Mar-2017  | 03:00:00, | NaN |
| 06-Mar-2017  | 04:00:00, | NaN |
| 06-Mar-2017  | 05:00:00, | NaN |
| 06-Mar-2017  | 06:00:00, | NaN |
| 06-Mar-2017  | 07:00:00, | NaN |
| 06-Mar-2017  | 08:00:00, | NaN |
| 06-Mar-2017  | 09:00:00, | NaN |
| 06-Mar-2017  | 10:00:00, | NaN |
| 06-Mar-2017  | 11:00:00, | NaN |
| 06-Mar-2017  | 12:00:00, | NaN |
| 06-Mar-2017  | 13:00:00, | NaN |
| 06-Mar-2017  | 14:00:00, | NaN |
| 06-Mar-2017  | 15:00:00, | NaN |
| 06-Mar-2017  | 16:00:00, | NaN |
| 06-Mar-2017  | 17:00:00, | NaN |

06-Mar-2017 18:00:00, NaN  
06-Mar-2017 19:00:00, NaN  
06-Mar-2017 20:00:00, NaN  
06-Mar-2017 21:00:00, NaN  
06-Mar-2017 22:00:00, NaN  
06-Mar-2017 23:00:00, NaN  
07-Mar-2017, NaN  
07-Mar-2017 01:00:00, NaN  
07-Mar-2017 02:00:00, NaN  
07-Mar-2017 03:00:00, NaN  
07-Mar-2017 04:00:00, NaN  
07-Mar-2017 05:00:00, NaN  
07-Mar-2017 06:00:00, NaN  
07-Mar-2017 07:00:00, NaN  
07-Mar-2017 08:00:00, NaN  
07-Mar-2017 09:00:00, NaN  
07-Mar-2017 10:00:00, NaN  
07-Mar-2017 11:00:00, NaN  
07-Mar-2017 12:00:00, NaN  
07-Mar-2017 13:00:00, NaN  
07-Mar-2017 14:00:00, NaN  
07-Mar-2017 15:00:00, NaN  
07-Mar-2017 16:00:00, NaN  
07-Mar-2017 17:00:00, NaN  
07-Mar-2017 18:00:00, NaN  
07-Mar-2017 19:00:00, NaN  
07-Mar-2017 20:00:00, NaN  
07-Mar-2017 21:00:00, NaN  
07-Mar-2017 22:00:00, NaN  
07-Mar-2017 23:00:00, NaN  
08-Mar-2017, NaN  
08-Mar-2017 01:00:00, NaN  
08-Mar-2017 02:00:00, NaN  
08-Mar-2017 03:00:00, NaN  
08-Mar-2017 04:00:00, NaN  
08-Mar-2017 05:00:00, NaN  
08-Mar-2017 06:00:00, NaN  
08-Mar-2017 07:00:00, NaN  
08-Mar-2017 08:00:00, NaN  
08-Mar-2017 09:00:00, NaN  
08-Mar-2017 10:00:00, NaN  
08-Mar-2017 11:00:00, NaN  
08-Mar-2017 12:00:00, NaN  
08-Mar-2017 13:00:00, NaN  
08-Mar-2017 14:00:00, NaN  
08-Mar-2017 15:00:00, NaN  
08-Mar-2017 16:00:00, NaN  
08-Mar-2017 17:00:00, NaN  
08-Mar-2017 18:00:00, NaN  
08-Mar-2017 19:00:00, NaN  
08-Mar-2017 20:00:00, NaN  
08-Mar-2017 21:00:00, NaN  
08-Mar-2017 22:00:00, NaN  
08-Mar-2017 23:00:00, NaN  
09-Mar-2017, NaN  
09-Mar-2017 01:00:00, NaN  
09-Mar-2017 02:00:00, NaN  
09-Mar-2017 03:00:00, NaN  
09-Mar-2017 04:00:00, NaN  
09-Mar-2017 05:00:00, NaN  
09-Mar-2017 06:00:00, NaN  
09-Mar-2017 07:00:00, NaN  
09-Mar-2017 08:00:00, NaN  
09-Mar-2017 09:00:00, NaN

09-Mar-2017 10:00:00, NaN  
09-Mar-2017 11:00:00, NaN  
09-Mar-2017 12:00:00, NaN  
09-Mar-2017 13:00:00, NaN  
09-Mar-2017 14:00:00, NaN  
09-Mar-2017 15:00:00, NaN  
09-Mar-2017 16:00:00, NaN  
09-Mar-2017 17:00:00, NaN  
09-Mar-2017 18:00:00, NaN  
09-Mar-2017 19:00:00, NaN  
09-Mar-2017 20:00:00, NaN  
09-Mar-2017 21:00:00, NaN  
09-Mar-2017 22:00:00, NaN  
09-Mar-2017 23:00:00, NaN  
10-Mar-2017, NaN  
10-Mar-2017 01:00:00, NaN  
10-Mar-2017 02:00:00, NaN  
10-Mar-2017 03:00:00, NaN  
10-Mar-2017 04:00:00, NaN  
10-Mar-2017 05:00:00, NaN  
10-Mar-2017 06:00:00, NaN  
10-Mar-2017 07:00:00, NaN  
10-Mar-2017 08:00:00, NaN  
10-Mar-2017 09:00:00, NaN  
10-Mar-2017 10:00:00, NaN  
10-Mar-2017 11:00:00, NaN  
10-Mar-2017 12:00:00, NaN  
10-Mar-2017 13:00:00, NaN  
10-Mar-2017 14:00:00, NaN  
10-Mar-2017 15:00:00, NaN  
10-Mar-2017 16:00:00, NaN  
10-Mar-2017 17:00:00, NaN  
10-Mar-2017 18:00:00, NaN  
10-Mar-2017 19:00:00, NaN  
10-Mar-2017 20:00:00, NaN  
10-Mar-2017 21:00:00, NaN  
10-Mar-2017 22:00:00, NaN  
10-Mar-2017 23:00:00, NaN  
11-Mar-2017, NaN  
11-Mar-2017 01:00:00, NaN  
11-Mar-2017 02:00:00, NaN  
11-Mar-2017 03:00:00, NaN  
11-Mar-2017 04:00:00, NaN  
11-Mar-2017 05:00:00, NaN  
11-Mar-2017 06:00:00, NaN  
11-Mar-2017 07:00:00, NaN  
11-Mar-2017 08:00:00, NaN  
11-Mar-2017 09:00:00, NaN  
11-Mar-2017 10:00:00, NaN  
11-Mar-2017 11:00:00, NaN  
11-Mar-2017 12:00:00, NaN  
11-Mar-2017 13:00:00, NaN  
11-Mar-2017 14:00:00, NaN  
11-Mar-2017 15:00:00, NaN  
11-Mar-2017 16:00:00, NaN  
11-Mar-2017 17:00:00, NaN  
11-Mar-2017 18:00:00, NaN  
11-Mar-2017 19:00:00, NaN  
11-Mar-2017 20:00:00, NaN  
11-Mar-2017 21:00:00, NaN  
11-Mar-2017 22:00:00, NaN  
11-Mar-2017 23:00:00, NaN  
12-Mar-2017, NaN  
12-Mar-2017 01:00:00, NaN

|              |           |     |
|--------------|-----------|-----|
| 12-Mar-2017  | 02:00:00, | NaN |
| 12-Mar-2017  | 03:00:00, | NaN |
| 12-Mar-2017  | 04:00:00, | NaN |
| 12-Mar-2017  | 05:00:00, | NaN |
| 12-Mar-2017  | 06:00:00, | NaN |
| 12-Mar-2017  | 08:00:00, | NaN |
| 12-Mar-2017  | 09:00:00, | NaN |
| 12-Mar-2017  | 10:00:00, | NaN |
| 12-Mar-2017  | 11:00:00, | NaN |
| 12-Mar-2017  | 12:00:00, | NaN |
| 12-Mar-2017  | 13:00:00, | NaN |
| 12-Mar-2017  | 14:00:00, | NaN |
| 12-Mar-2017  | 15:00:00, | NaN |
| 12-Mar-2017  | 16:00:00, | NaN |
| 12-Mar-2017  | 17:00:00, | NaN |
| 12-Mar-2017  | 18:00:00, | NaN |
| 12-Mar-2017  | 19:00:00, | NaN |
| 12-Mar-2017  | 20:00:00, | NaN |
| 12-Mar-2017  | 21:00:00, | NaN |
| 12-Mar-2017  | 22:00:00, | NaN |
| 12-Mar-2017  | 23:00:00, | NaN |
| 13-Mar-2017, | NaN       |     |
| 13-Mar-2017  | 01:00:00, | NaN |
| 13-Mar-2017  | 02:00:00, | NaN |
| 13-Mar-2017  | 03:00:00, | NaN |
| 13-Mar-2017  | 04:00:00, | NaN |
| 13-Mar-2017  | 05:00:00, | NaN |
| 13-Mar-2017  | 06:00:00, | NaN |
| 13-Mar-2017  | 07:00:00, | NaN |
| 13-Mar-2017  | 08:00:00, | NaN |
| 13-Mar-2017  | 09:00:00, | NaN |
| 13-Mar-2017  | 10:00:00, | NaN |
| 13-Mar-2017  | 11:00:00, | NaN |
| 13-Mar-2017  | 12:00:00, | NaN |
| 13-Mar-2017  | 13:00:00, | NaN |
| 13-Mar-2017  | 14:00:00, | NaN |
| 13-Mar-2017  | 15:00:00, | NaN |
| 13-Mar-2017  | 16:00:00, | NaN |
| 13-Mar-2017  | 17:00:00, | NaN |
| 13-Mar-2017  | 18:00:00, | NaN |
| 13-Mar-2017  | 19:00:00, | NaN |
| 13-Mar-2017  | 20:00:00, | NaN |
| 13-Mar-2017  | 21:00:00, | NaN |
| 13-Mar-2017  | 22:00:00, | NaN |
| 13-Mar-2017  | 23:00:00, | NaN |
| 14-Mar-2017, | NaN       |     |
| 14-Mar-2017  | 01:00:00, | NaN |
| 14-Mar-2017  | 02:00:00, | NaN |
| 14-Mar-2017  | 03:00:00, | NaN |
| 14-Mar-2017  | 04:00:00, | NaN |
| 14-Mar-2017  | 05:00:00, | NaN |
| 14-Mar-2017  | 06:00:00, | NaN |
| 14-Mar-2017  | 07:00:00, | NaN |
| 14-Mar-2017  | 08:00:00, | NaN |
| 14-Mar-2017  | 09:00:00, | NaN |
| 14-Mar-2017  | 10:00:00, | NaN |
| 14-Mar-2017  | 11:00:00, | NaN |
| 14-Mar-2017  | 12:00:00, | NaN |
| 14-Mar-2017  | 13:00:00, | NaN |
| 14-Mar-2017  | 14:00:00, | NaN |
| 14-Mar-2017  | 15:00:00, | NaN |
| 14-Mar-2017  | 16:00:00, | NaN |
| 14-Mar-2017  | 17:00:00, | NaN |
| 14-Mar-2017  | 18:00:00, | NaN |

14-Mar-2017 19:00:00, NaN  
14-Mar-2017 20:00:00, NaN  
14-Mar-2017 21:00:00, NaN  
14-Mar-2017 22:00:00, NaN  
14-Mar-2017 23:00:00, NaN  
15-Mar-2017, NaN  
15-Mar-2017 01:00:00, NaN  
15-Mar-2017 02:00:00, NaN  
15-Mar-2017 03:00:00, NaN  
15-Mar-2017 04:00:00, NaN  
15-Mar-2017 05:00:00, NaN  
15-Mar-2017 06:00:00, NaN  
15-Mar-2017 07:00:00, NaN  
15-Mar-2017 08:00:00, NaN  
15-Mar-2017 09:00:00, NaN  
15-Mar-2017 10:00:00, NaN  
15-Mar-2017 11:00:00, NaN  
15-Mar-2017 12:00:00, NaN  
15-Mar-2017 13:00:00, NaN  
15-Mar-2017 14:00:00, NaN  
15-Mar-2017 15:00:00, NaN  
15-Mar-2017 16:00:00, NaN  
15-Mar-2017 17:00:00, NaN  
15-Mar-2017 18:00:00, NaN  
15-Mar-2017 19:00:00, NaN  
15-Mar-2017 20:00:00, NaN  
15-Mar-2017 21:00:00, NaN  
15-Mar-2017 22:00:00, NaN  
15-Mar-2017 23:00:00, NaN  
16-Mar-2017, NaN  
16-Mar-2017 01:00:00, NaN  
16-Mar-2017 02:00:00, NaN  
16-Mar-2017 03:00:00, NaN  
16-Mar-2017 04:00:00, NaN  
16-Mar-2017 05:00:00, NaN  
16-Mar-2017 06:00:00, NaN  
16-Mar-2017 07:00:00, NaN  
16-Mar-2017 08:00:00, NaN  
16-Mar-2017 09:00:00, NaN  
16-Mar-2017 10:00:00, NaN  
16-Mar-2017 11:00:00, NaN  
16-Mar-2017 12:00:00, NaN  
16-Mar-2017 13:00:00, NaN  
16-Mar-2017 14:00:00, NaN  
16-Mar-2017 15:00:00, NaN  
16-Mar-2017 16:00:00, NaN  
16-Mar-2017 17:00:00, NaN  
16-Mar-2017 18:00:00, NaN  
16-Mar-2017 19:00:00, NaN  
16-Mar-2017 20:00:00, NaN  
16-Mar-2017 21:00:00, NaN  
16-Mar-2017 22:00:00, NaN  
16-Mar-2017 23:00:00, NaN  
17-Mar-2017, NaN  
17-Mar-2017 01:00:00, NaN  
17-Mar-2017 02:00:00, NaN  
17-Mar-2017 03:00:00, NaN  
17-Mar-2017 04:00:00, NaN  
17-Mar-2017 05:00:00, NaN  
17-Mar-2017 06:00:00, NaN  
17-Mar-2017 07:00:00, NaN  
17-Mar-2017 08:00:00, NaN  
17-Mar-2017 09:00:00, NaN  
17-Mar-2017 10:00:00, NaN

17-Mar-2017 11:00:00, NaN  
17-Mar-2017 12:00:00, NaN  
17-Mar-2017 13:00:00, NaN  
17-Mar-2017 14:00:00, NaN  
17-Mar-2017 15:00:00, NaN  
17-Mar-2017 16:00:00, NaN  
17-Mar-2017 17:00:00, NaN  
17-Mar-2017 18:00:00, NaN  
17-Mar-2017 19:00:00, NaN  
17-Mar-2017 20:00:00, NaN  
17-Mar-2017 21:00:00, NaN  
17-Mar-2017 22:00:00, NaN  
17-Mar-2017 23:00:00, NaN  
18-Mar-2017, NaN  
18-Mar-2017 01:00:00, NaN  
18-Mar-2017 02:00:00, NaN  
18-Mar-2017 03:00:00, NaN  
18-Mar-2017 04:00:00, NaN  
18-Mar-2017 05:00:00, NaN  
18-Mar-2017 06:00:00, NaN  
18-Mar-2017 07:00:00, NaN  
18-Mar-2017 08:00:00, NaN  
18-Mar-2017 09:00:00, NaN  
18-Mar-2017 10:00:00, NaN  
18-Mar-2017 11:00:00, NaN  
18-Mar-2017 12:00:00, NaN  
18-Mar-2017 13:00:00, NaN  
18-Mar-2017 14:00:00, NaN  
18-Mar-2017 15:00:00, NaN  
18-Mar-2017 16:00:00, NaN  
18-Mar-2017 17:00:00, NaN  
18-Mar-2017 18:00:00, NaN  
18-Mar-2017 19:00:00, NaN  
18-Mar-2017 20:00:00, NaN  
18-Mar-2017 21:00:00, NaN  
18-Mar-2017 22:00:00, NaN  
18-Mar-2017 23:00:00, NaN  
19-Mar-2017, NaN  
19-Mar-2017 01:00:00, NaN  
19-Mar-2017 02:00:00, NaN  
19-Mar-2017 03:00:00, NaN  
19-Mar-2017 04:00:00, NaN  
19-Mar-2017 05:00:00, NaN  
19-Mar-2017 06:00:00, NaN  
19-Mar-2017 07:00:00, NaN  
19-Mar-2017 08:00:00, NaN  
19-Mar-2017 09:00:00, NaN  
19-Mar-2017 10:00:00, NaN  
19-Mar-2017 11:00:00, NaN  
19-Mar-2017 12:00:00, NaN  
19-Mar-2017 13:00:00, NaN  
19-Mar-2017 14:00:00, NaN  
19-Mar-2017 15:00:00, NaN  
19-Mar-2017 16:00:00, NaN  
19-Mar-2017 17:00:00, NaN  
19-Mar-2017 18:00:00, NaN  
19-Mar-2017 19:00:00, NaN  
19-Mar-2017 20:00:00, NaN  
19-Mar-2017 21:00:00, NaN  
19-Mar-2017 22:00:00, NaN  
19-Mar-2017 23:00:00, NaN  
20-Mar-2017, NaN  
20-Mar-2017 01:00:00, NaN  
20-Mar-2017 02:00:00, NaN



20-Mar-2017 03:00:00, NaN  
20-Mar-2017 04:00:00, NaN  
20-Mar-2017 05:00:00, NaN  
20-Mar-2017 06:00:00, NaN  
20-Mar-2017 07:00:00, NaN  
20-Mar-2017 08:00:00, NaN  
20-Mar-2017 09:00:00, NaN  
20-Mar-2017 10:00:00, NaN  
20-Mar-2017 11:00:00, NaN  
20-Mar-2017 12:00:00, NaN  
20-Mar-2017 13:00:00, NaN  
20-Mar-2017 14:00:00, NaN  
20-Mar-2017 15:00:00, NaN  
20-Mar-2017 16:00:00, NaN  
20-Mar-2017 17:00:00, NaN  
20-Mar-2017 18:00:00, NaN  
20-Mar-2017 19:00:00, NaN  
20-Mar-2017 20:00:00, NaN  
20-Mar-2017 21:00:00, NaN  
20-Mar-2017 22:00:00, NaN  
20-Mar-2017 23:00:00, NaN  
21-Mar-2017, NaN  
21-Mar-2017 01:00:00, NaN  
21-Mar-2017 02:00:00, NaN  
21-Mar-2017 03:00:00, NaN  
21-Mar-2017 04:00:00, NaN  
21-Mar-2017 05:00:00, NaN  
21-Mar-2017 06:00:00, NaN  
21-Mar-2017 07:00:00, NaN  
21-Mar-2017 08:00:00, NaN  
21-Mar-2017 09:00:00, NaN  
21-Mar-2017 10:00:00, NaN  
21-Mar-2017 11:00:00, NaN  
21-Mar-2017 12:00:00, NaN  
21-Mar-2017 13:00:00, NaN  
21-Mar-2017 14:00:00, NaN  
21-Mar-2017 15:00:00, NaN  
21-Mar-2017 16:00:00, NaN  
21-Mar-2017 17:00:00, NaN  
21-Mar-2017 18:00:00, NaN  
21-Mar-2017 19:00:00, NaN  
21-Mar-2017 20:00:00, NaN  
21-Mar-2017 21:00:00, NaN  
21-Mar-2017 22:00:00, NaN  
21-Mar-2017 23:00:00, NaN  
22-Mar-2017, NaN  
22-Mar-2017 01:00:00, NaN  
22-Mar-2017 02:00:00, NaN  
22-Mar-2017 03:00:00, NaN  
22-Mar-2017 04:00:00, NaN  
22-Mar-2017 05:00:00, NaN  
22-Mar-2017 06:00:00, NaN  
22-Mar-2017 07:00:00, NaN  
22-Mar-2017 08:00:00, NaN  
22-Mar-2017 09:00:00, NaN  
22-Mar-2017 10:00:00, NaN  
22-Mar-2017 11:00:00, NaN  
22-Mar-2017 12:00:00, NaN  
22-Mar-2017 13:00:00, NaN  
22-Mar-2017 14:00:00, NaN  
22-Mar-2017 15:00:00, NaN  
22-Mar-2017 16:00:00, NaN  
22-Mar-2017 17:00:00, NaN  
22-Mar-2017 18:00:00, NaN

22-Mar-2017 19:00:00, NaN  
22-Mar-2017 20:00:00, NaN  
22-Mar-2017 21:00:00, NaN  
22-Mar-2017 22:00:00, NaN  
22-Mar-2017 23:00:00, NaN  
23-Mar-2017, NaN  
23-Mar-2017 01:00:00, NaN  
23-Mar-2017 02:00:00, NaN  
23-Mar-2017 03:00:00, NaN  
23-Mar-2017 04:00:00, NaN  
23-Mar-2017 05:00:00, NaN  
23-Mar-2017 06:00:00, NaN  
23-Mar-2017 07:00:00, NaN  
23-Mar-2017 08:00:00, NaN  
23-Mar-2017 09:00:00, NaN  
23-Mar-2017 10:00:00, NaN  
23-Mar-2017 11:00:00, NaN  
23-Mar-2017 12:00:00, NaN  
23-Mar-2017 13:00:00, NaN  
23-Mar-2017 14:00:00, NaN  
23-Mar-2017 15:00:00, NaN  
23-Mar-2017 16:00:00, NaN  
23-Mar-2017 17:00:00, NaN  
23-Mar-2017 18:00:00, NaN  
23-Mar-2017 19:00:00, NaN  
23-Mar-2017 20:00:00, NaN  
23-Mar-2017 21:00:00, NaN  
23-Mar-2017 22:00:00, NaN  
23-Mar-2017 23:00:00, NaN  
24-Mar-2017, NaN  
24-Mar-2017 01:00:00, NaN  
24-Mar-2017 02:00:00, NaN  
24-Mar-2017 03:00:00, NaN  
24-Mar-2017 04:00:00, NaN  
24-Mar-2017 05:00:00, NaN  
24-Mar-2017 06:00:00, NaN  
24-Mar-2017 07:00:00, NaN  
24-Mar-2017 08:00:00, NaN  
24-Mar-2017 09:00:00, NaN  
24-Mar-2017 10:00:00, NaN  
24-Mar-2017 11:00:00, NaN  
24-Mar-2017 12:00:00, NaN  
24-Mar-2017 13:00:00, NaN  
24-Mar-2017 14:00:00, NaN  
24-Mar-2017 15:00:00, NaN  
24-Mar-2017 16:00:00, NaN  
24-Mar-2017 17:00:00, NaN  
24-Mar-2017 18:00:00, NaN  
24-Mar-2017 19:00:00, NaN  
24-Mar-2017 20:00:00, NaN  
24-Mar-2017 21:00:00, NaN  
24-Mar-2017 22:00:00, NaN  
24-Mar-2017 23:00:00, NaN  
25-Mar-2017, NaN  
25-Mar-2017 01:00:00, NaN  
25-Mar-2017 02:00:00, NaN  
25-Mar-2017 03:00:00, NaN  
25-Mar-2017 04:00:00, NaN  
25-Mar-2017 05:00:00, NaN  
25-Mar-2017 06:00:00, NaN  
25-Mar-2017 07:00:00, NaN  
25-Mar-2017 08:00:00, NaN  
25-Mar-2017 09:00:00, NaN  
25-Mar-2017 10:00:00, NaN

25-Mar-2017 11:00:00, NaN  
25-Mar-2017 12:00:00, NaN  
25-Mar-2017 13:00:00, NaN  
25-Mar-2017 14:00:00, NaN  
25-Mar-2017 15:00:00, NaN  
25-Mar-2017 16:00:00, NaN  
25-Mar-2017 17:00:00, NaN  
25-Mar-2017 18:00:00, NaN  
25-Mar-2017 19:00:00, NaN  
25-Mar-2017 20:00:00, NaN  
25-Mar-2017 21:00:00, NaN  
25-Mar-2017 22:00:00, NaN  
25-Mar-2017 23:00:00, NaN  
26-Mar-2017, NaN  
26-Mar-2017 01:00:00, NaN  
26-Mar-2017 02:00:00, NaN  
26-Mar-2017 03:00:00, NaN  
26-Mar-2017 04:00:00, NaN  
26-Mar-2017 05:00:00, NaN  
26-Mar-2017 06:00:00, NaN  
26-Mar-2017 07:00:00, NaN  
26-Mar-2017 08:00:00, NaN  
26-Mar-2017 09:00:00, NaN  
26-Mar-2017 10:00:00, NaN  
26-Mar-2017 11:00:00, NaN  
26-Mar-2017 12:00:00, NaN  
26-Mar-2017 13:00:00, NaN  
26-Mar-2017 14:00:00, NaN  
26-Mar-2017 15:00:00, NaN  
26-Mar-2017 16:00:00, NaN  
26-Mar-2017 17:00:00, NaN  
26-Mar-2017 18:00:00, NaN  
26-Mar-2017 19:00:00, NaN  
26-Mar-2017 20:00:00, NaN  
26-Mar-2017 21:00:00, NaN  
26-Mar-2017 22:00:00, NaN  
26-Mar-2017 23:00:00, NaN  
27-Mar-2017, NaN  
27-Mar-2017 01:00:00, NaN  
27-Mar-2017 02:00:00, NaN  
27-Mar-2017 03:00:00, NaN  
27-Mar-2017 04:00:00, NaN  
27-Mar-2017 05:00:00, NaN  
27-Mar-2017 06:00:00, NaN  
27-Mar-2017 07:00:00, NaN  
27-Mar-2017 08:00:00, NaN  
27-Mar-2017 09:00:00, NaN  
27-Mar-2017 10:00:00, NaN  
27-Mar-2017 11:00:00, NaN  
27-Mar-2017 12:00:00, NaN  
27-Mar-2017 13:00:00, NaN  
27-Mar-2017 14:00:00, NaN  
27-Mar-2017 15:00:00, NaN  
27-Mar-2017 16:00:00, NaN  
27-Mar-2017 17:00:00, NaN  
27-Mar-2017 18:00:00, NaN  
27-Mar-2017 19:00:00, NaN  
27-Mar-2017 20:00:00, NaN  
27-Mar-2017 21:00:00, NaN  
27-Mar-2017 22:00:00, NaN  
27-Mar-2017 23:00:00, NaN  
28-Mar-2017, NaN  
28-Mar-2017 01:00:00, NaN  
28-Mar-2017 02:00:00, NaN

|              |           |     |
|--------------|-----------|-----|
| 28-Mar-2017  | 03:00:00, | NaN |
| 28-Mar-2017  | 04:00:00, | NaN |
| 28-Mar-2017  | 05:00:00, | NaN |
| 28-Mar-2017  | 06:00:00, | NaN |
| 28-Mar-2017  | 07:00:00, | NaN |
| 28-Mar-2017  | 08:00:00, | NaN |
| 28-Mar-2017  | 09:00:00, | NaN |
| 28-Mar-2017  | 10:00:00, | NaN |
| 28-Mar-2017  | 11:00:00, | NaN |
| 28-Mar-2017  | 12:00:00, | NaN |
| 28-Mar-2017  | 13:00:00, | NaN |
| 28-Mar-2017  | 14:00:00, | NaN |
| 28-Mar-2017  | 15:00:00, | NaN |
| 28-Mar-2017  | 16:00:00, | NaN |
| 28-Mar-2017  | 17:00:00, | NaN |
| 28-Mar-2017  | 18:00:00, | NaN |
| 28-Mar-2017  | 19:00:00, | NaN |
| 28-Mar-2017  | 20:00:00, | NaN |
| 28-Mar-2017  | 21:00:00, | NaN |
| 28-Mar-2017  | 22:00:00, | NaN |
| 28-Mar-2017  | 23:00:00, | NaN |
| 29-Mar-2017, | NaN       |     |
| 29-Mar-2017  | 01:00:00, | NaN |
| 29-Mar-2017  | 02:00:00, | NaN |
| 29-Mar-2017  | 03:00:00, | NaN |
| 29-Mar-2017  | 04:00:00, | NaN |
| 29-Mar-2017  | 05:00:00, | NaN |
| 29-Mar-2017  | 06:00:00, | NaN |
| 29-Mar-2017  | 07:00:00, | NaN |
| 29-Mar-2017  | 08:00:00, | NaN |
| 29-Mar-2017  | 09:00:00, | NaN |
| 29-Mar-2017  | 10:00:00, | NaN |
| 29-Mar-2017  | 11:00:00, | NaN |
| 29-Mar-2017  | 12:00:00, | NaN |
| 29-Mar-2017  | 13:00:00, | NaN |
| 29-Mar-2017  | 14:00:00, | NaN |
| 29-Mar-2017  | 15:00:00, | NaN |
| 29-Mar-2017  | 16:00:00, | NaN |
| 29-Mar-2017  | 17:00:00, | NaN |
| 29-Mar-2017  | 18:00:00, | NaN |
| 29-Mar-2017  | 19:00:00, | NaN |
| 29-Mar-2017  | 20:00:00, | NaN |
| 29-Mar-2017  | 21:00:00, | NaN |
| 29-Mar-2017  | 22:00:00, | NaN |
| 29-Mar-2017  | 23:00:00, | NaN |
| 30-Mar-2017, | NaN       |     |
| 30-Mar-2017  | 01:00:00, | NaN |
| 30-Mar-2017  | 02:00:00, | NaN |
| 30-Mar-2017  | 03:00:00, | NaN |
| 30-Mar-2017  | 04:00:00, | NaN |
| 30-Mar-2017  | 05:00:00, | NaN |
| 30-Mar-2017  | 06:00:00, | NaN |
| 30-Mar-2017  | 07:00:00, | NaN |
| 30-Mar-2017  | 08:00:00, | NaN |
| 30-Mar-2017  | 09:00:00, | NaN |
| 30-Mar-2017  | 10:00:00, | NaN |
| 30-Mar-2017  | 11:00:00, | NaN |
| 30-Mar-2017  | 12:00:00, | NaN |
| 30-Mar-2017  | 13:00:00, | NaN |
| 30-Mar-2017  | 14:00:00, | NaN |
| 30-Mar-2017  | 15:00:00, | NaN |
| 30-Mar-2017  | 16:00:00, | NaN |
| 30-Mar-2017  | 17:00:00, | NaN |
| 30-Mar-2017  | 18:00:00, | NaN |

30-Mar-2017 19:00:00, NaN  
30-Mar-2017 20:00:00, NaN  
30-Mar-2017 21:00:00, NaN  
30-Mar-2017 22:00:00, NaN  
30-Mar-2017 23:00:00, NaN  
31-Mar-2017, NaN  
31-Mar-2017 01:00:00, NaN  
31-Mar-2017 02:00:00, NaN  
31-Mar-2017 03:00:00, NaN  
31-Mar-2017 04:00:00, NaN  
31-Mar-2017 05:00:00, NaN  
31-Mar-2017 06:00:00, NaN  
31-Mar-2017 07:00:00, NaN  
31-Mar-2017 08:00:00, NaN  
31-Mar-2017 09:00:00, NaN  
31-Mar-2017 10:00:00, NaN  
31-Mar-2017 11:00:00, NaN  
31-Mar-2017 12:00:00, NaN  
31-Mar-2017 13:00:00, NaN  
31-Mar-2017 14:00:00, NaN  
31-Mar-2017 15:00:00, NaN  
31-Mar-2017 16:00:00, NaN  
31-Mar-2017 17:00:00, NaN  
31-Mar-2017 18:00:00, NaN  
31-Mar-2017 19:00:00, NaN  
31-Mar-2017 20:00:00, NaN  
31-Mar-2017 21:00:00, NaN  
31-Mar-2017 22:00:00, NaN  
31-Mar-2017 23:00:00, NaN  
01-Apr-2017, NaN  
01-Apr-2017 01:00:00, NaN  
01-Apr-2017 02:00:00, NaN  
01-Apr-2017 03:00:00, NaN  
01-Apr-2017 04:00:00, NaN  
01-Apr-2017 05:00:00, NaN  
01-Apr-2017 06:00:00, NaN  
01-Apr-2017 07:00:00, NaN  
01-Apr-2017 08:00:00, NaN  
01-Apr-2017 09:00:00, NaN  
01-Apr-2017 10:00:00, NaN  
01-Apr-2017 11:00:00, NaN  
01-Apr-2017 12:00:00, NaN  
01-Apr-2017 13:00:00, NaN  
01-Apr-2017 14:00:00, NaN  
01-Apr-2017 15:00:00, NaN  
01-Apr-2017 16:00:00, NaN  
01-Apr-2017 17:00:00, NaN  
01-Apr-2017 18:00:00, NaN  
01-Apr-2017 19:00:00, NaN  
01-Apr-2017 20:00:00, NaN  
01-Apr-2017 21:00:00, NaN  
01-Apr-2017 22:00:00, NaN  
01-Apr-2017 23:00:00, NaN  
02-Apr-2017, NaN  
02-Apr-2017 01:00:00, NaN  
02-Apr-2017 02:00:00, NaN  
02-Apr-2017 03:00:00, NaN  
02-Apr-2017 04:00:00, NaN  
02-Apr-2017 05:00:00, NaN  
02-Apr-2017 06:00:00, NaN  
02-Apr-2017 07:00:00, NaN  
02-Apr-2017 08:00:00, NaN  
02-Apr-2017 09:00:00, NaN  
02-Apr-2017 10:00:00, NaN

02-Apr-2017 11:00:00, NaN  
02-Apr-2017 12:00:00, NaN  
02-Apr-2017 13:00:00, NaN  
02-Apr-2017 14:00:00, NaN  
02-Apr-2017 15:00:00, NaN  
02-Apr-2017 16:00:00, NaN  
02-Apr-2017 17:00:00, NaN  
02-Apr-2017 18:00:00, NaN  
02-Apr-2017 19:00:00, NaN  
02-Apr-2017 20:00:00, NaN  
02-Apr-2017 21:00:00, NaN  
02-Apr-2017 22:00:00, NaN  
02-Apr-2017 23:00:00, NaN  
03-Apr-2017, NaN  
03-Apr-2017 01:00:00, NaN  
03-Apr-2017 02:00:00, NaN  
03-Apr-2017 03:00:00, NaN  
03-Apr-2017 04:00:00, NaN  
03-Apr-2017 05:00:00, NaN  
03-Apr-2017 06:00:00, NaN  
03-Apr-2017 07:00:00, NaN  
03-Apr-2017 08:00:00, NaN  
03-Apr-2017 09:00:00, NaN  
03-Apr-2017 10:00:00, NaN  
03-Apr-2017 11:00:00, NaN  
03-Apr-2017 12:00:00, NaN  
03-Apr-2017 13:00:00, NaN  
03-Apr-2017 14:00:00, NaN  
03-Apr-2017 15:00:00, NaN  
03-Apr-2017 16:00:00, NaN  
03-Apr-2017 17:00:00, NaN  
03-Apr-2017 18:00:00, NaN  
03-Apr-2017 19:00:00, NaN  
03-Apr-2017 20:00:00, NaN  
03-Apr-2017 21:00:00, NaN  
03-Apr-2017 22:00:00, NaN  
03-Apr-2017 23:00:00, NaN  
04-Apr-2017, NaN  
04-Apr-2017 01:00:00, NaN  
04-Apr-2017 02:00:00, NaN  
04-Apr-2017 03:00:00, NaN  
04-Apr-2017 04:00:00, NaN  
04-Apr-2017 05:00:00, NaN  
04-Apr-2017 06:00:00, NaN  
04-Apr-2017 07:00:00, NaN  
04-Apr-2017 08:00:00, NaN  
04-Apr-2017 09:00:00, NaN  
04-Apr-2017 10:00:00, NaN  
04-Apr-2017 11:00:00, NaN  
04-Apr-2017 12:00:00, NaN  
04-Apr-2017 13:00:00, NaN  
04-Apr-2017 14:00:00, NaN  
04-Apr-2017 15:00:00, NaN  
04-Apr-2017 16:00:00, NaN  
04-Apr-2017 17:00:00, NaN  
04-Apr-2017 18:00:00, NaN  
04-Apr-2017 19:00:00, NaN  
04-Apr-2017 20:00:00, NaN  
04-Apr-2017 21:00:00, NaN  
04-Apr-2017 22:00:00, NaN  
04-Apr-2017 23:00:00, NaN  
05-Apr-2017, NaN  
05-Apr-2017 01:00:00, NaN  
05-Apr-2017 02:00:00, NaN

05-Apr-2017 03:00:00, NaN  
05-Apr-2017 04:00:00, NaN  
05-Apr-2017 05:00:00, NaN  
05-Apr-2017 06:00:00, NaN  
05-Apr-2017 07:00:00, NaN  
05-Apr-2017 08:00:00, NaN  
05-Apr-2017 09:00:00, NaN  
05-Apr-2017 10:00:00, NaN  
05-Apr-2017 11:00:00, NaN  
05-Apr-2017 12:00:00, NaN  
05-Apr-2017 13:00:00, NaN  
05-Apr-2017 14:00:00, NaN  
05-Apr-2017 15:00:00, NaN  
05-Apr-2017 16:00:00, NaN  
05-Apr-2017 17:00:00, NaN  
05-Apr-2017 18:00:00, NaN  
05-Apr-2017 19:00:00, NaN  
05-Apr-2017 20:00:00, NaN  
05-Apr-2017 21:00:00, NaN  
05-Apr-2017 22:00:00, NaN  
05-Apr-2017 23:00:00, NaN  
06-Apr-2017, NaN  
06-Apr-2017 01:00:00, NaN  
06-Apr-2017 02:00:00, NaN  
06-Apr-2017 03:00:00, NaN  
06-Apr-2017 04:00:00, NaN  
06-Apr-2017 05:00:00, NaN  
06-Apr-2017 06:00:00, NaN  
06-Apr-2017 07:00:00, NaN  
06-Apr-2017 08:00:00, NaN  
06-Apr-2017 09:00:00, NaN  
06-Apr-2017 10:00:00, NaN  
06-Apr-2017 11:00:00, NaN  
06-Apr-2017 12:00:00, NaN  
06-Apr-2017 13:00:00, NaN  
06-Apr-2017 14:00:00, NaN  
06-Apr-2017 15:00:00, NaN  
06-Apr-2017 16:00:00, NaN  
06-Apr-2017 17:00:00, NaN  
06-Apr-2017 18:00:00, NaN  
06-Apr-2017 19:00:00, NaN  
06-Apr-2017 20:00:00, NaN  
06-Apr-2017 21:00:00, NaN  
06-Apr-2017 22:00:00, NaN  
06-Apr-2017 23:00:00, NaN  
07-Apr-2017, NaN  
07-Apr-2017 01:00:00, NaN  
07-Apr-2017 02:00:00, NaN  
07-Apr-2017 03:00:00, NaN  
07-Apr-2017 04:00:00, NaN  
07-Apr-2017 05:00:00, NaN  
07-Apr-2017 06:00:00, NaN  
07-Apr-2017 07:00:00, NaN  
07-Apr-2017 08:00:00, NaN  
07-Apr-2017 09:00:00, NaN  
07-Apr-2017 10:00:00, NaN  
07-Apr-2017 11:00:00, NaN  
07-Apr-2017 12:00:00, NaN  
07-Apr-2017 13:00:00, NaN  
07-Apr-2017 14:00:00, NaN  
07-Apr-2017 15:00:00, NaN  
07-Apr-2017 16:00:00, NaN  
07-Apr-2017 17:00:00, NaN  
07-Apr-2017 18:00:00, NaN

07-Apr-2017 19:00:00, NaN  
07-Apr-2017 20:00:00, NaN  
07-Apr-2017 21:00:00, NaN  
07-Apr-2017 22:00:00, NaN  
07-Apr-2017 23:00:00, NaN  
08-Apr-2017, NaN  
08-Apr-2017 01:00:00, NaN  
08-Apr-2017 02:00:00, NaN  
08-Apr-2017 03:00:00, NaN  
08-Apr-2017 04:00:00, NaN  
08-Apr-2017 05:00:00, NaN  
08-Apr-2017 06:00:00, NaN  
08-Apr-2017 07:00:00, NaN  
08-Apr-2017 08:00:00, NaN  
08-Apr-2017 09:00:00, NaN  
08-Apr-2017 10:00:00, NaN  
08-Apr-2017 11:00:00, NaN  
08-Apr-2017 12:00:00, NaN  
08-Apr-2017 13:00:00, NaN  
08-Apr-2017 14:00:00, NaN  
08-Apr-2017 15:00:00, NaN  
08-Apr-2017 16:00:00, NaN  
08-Apr-2017 17:00:00, NaN  
08-Apr-2017 18:00:00, NaN  
08-Apr-2017 19:00:00, NaN  
08-Apr-2017 20:00:00, NaN  
08-Apr-2017 21:00:00, NaN  
08-Apr-2017 22:00:00, NaN  
08-Apr-2017 23:00:00, NaN  
09-Apr-2017, NaN  
09-Apr-2017 01:00:00, NaN  
09-Apr-2017 02:00:00, NaN  
09-Apr-2017 03:00:00, NaN  
09-Apr-2017 04:00:00, NaN  
09-Apr-2017 05:00:00, NaN  
09-Apr-2017 06:00:00, NaN  
09-Apr-2017 07:00:00, NaN  
09-Apr-2017 08:00:00, NaN  
09-Apr-2017 09:00:00, NaN  
09-Apr-2017 10:00:00, NaN  
09-Apr-2017 11:00:00, NaN  
09-Apr-2017 12:00:00, NaN  
09-Apr-2017 13:00:00, NaN  
09-Apr-2017 14:00:00, NaN  
09-Apr-2017 15:00:00, NaN  
09-Apr-2017 16:00:00, NaN  
09-Apr-2017 17:00:00, NaN  
09-Apr-2017 18:00:00, NaN  
09-Apr-2017 19:00:00, NaN  
09-Apr-2017 20:00:00, NaN  
09-Apr-2017 21:00:00, NaN  
09-Apr-2017 22:00:00, NaN  
09-Apr-2017 23:00:00, NaN  
10-Apr-2017, NaN  
10-Apr-2017 01:00:00, NaN  
10-Apr-2017 02:00:00, NaN  
10-Apr-2017 03:00:00, NaN  
10-Apr-2017 04:00:00, NaN  
10-Apr-2017 05:00:00, NaN  
10-Apr-2017 06:00:00, NaN  
10-Apr-2017 07:00:00, NaN  
10-Apr-2017 08:00:00, NaN  
10-Apr-2017 09:00:00, NaN  
10-Apr-2017 10:00:00, NaN



10-Apr-2017 11:00:00, NaN  
10-Apr-2017 12:00:00, NaN  
10-Apr-2017 13:00:00, NaN  
10-Apr-2017 14:00:00, NaN  
10-Apr-2017 15:00:00, NaN  
10-Apr-2017 16:00:00, NaN  
10-Apr-2017 17:00:00, NaN  
10-Apr-2017 18:00:00, NaN  
10-Apr-2017 19:00:00, NaN  
10-Apr-2017 20:00:00, NaN  
10-Apr-2017 21:00:00, NaN  
10-Apr-2017 22:00:00, NaN  
10-Apr-2017 23:00:00, NaN  
11-Apr-2017, NaN  
11-Apr-2017 01:00:00, NaN  
11-Apr-2017 02:00:00, NaN  
11-Apr-2017 03:00:00, NaN  
11-Apr-2017 04:00:00, NaN  
11-Apr-2017 05:00:00, NaN  
11-Apr-2017 06:00:00, NaN  
11-Apr-2017 07:00:00, NaN  
11-Apr-2017 08:00:00, NaN  
11-Apr-2017 09:00:00, NaN  
11-Apr-2017 10:00:00, NaN  
11-Apr-2017 11:00:00, NaN  
11-Apr-2017 12:00:00, NaN  
11-Apr-2017 13:00:00, NaN  
11-Apr-2017 14:00:00, NaN  
11-Apr-2017 15:00:00, NaN  
11-Apr-2017 16:00:00, NaN  
11-Apr-2017 17:00:00, NaN  
11-Apr-2017 18:00:00, NaN  
11-Apr-2017 19:00:00, NaN  
11-Apr-2017 20:00:00, NaN  
11-Apr-2017 21:00:00, NaN  
11-Apr-2017 22:00:00, NaN  
11-Apr-2017 23:00:00, NaN  
12-Apr-2017, NaN  
12-Apr-2017 01:00:00, NaN  
12-Apr-2017 02:00:00, NaN  
12-Apr-2017 03:00:00, NaN  
12-Apr-2017 04:00:00, NaN  
12-Apr-2017 05:00:00, NaN  
12-Apr-2017 06:00:00, NaN  
12-Apr-2017 07:00:00, NaN  
12-Apr-2017 08:00:00, NaN  
12-Apr-2017 09:00:00, NaN  
12-Apr-2017 10:00:00, NaN  
12-Apr-2017 11:00:00, NaN  
12-Apr-2017 12:00:00, NaN  
12-Apr-2017 13:00:00, NaN  
12-Apr-2017 14:00:00, NaN  
12-Apr-2017 15:00:00, NaN  
12-Apr-2017 16:00:00, NaN  
12-Apr-2017 17:00:00, NaN  
12-Apr-2017 18:00:00, NaN  
12-Apr-2017 19:00:00, NaN  
12-Apr-2017 20:00:00, NaN  
12-Apr-2017 21:00:00, NaN  
12-Apr-2017 22:00:00, NaN  
12-Apr-2017 23:00:00, NaN  
13-Apr-2017, NaN  
13-Apr-2017 01:00:00, NaN  
13-Apr-2017 02:00:00, NaN

13-Apr-2017 03:00:00, NaN  
13-Apr-2017 04:00:00, NaN  
13-Apr-2017 05:00:00, NaN  
13-Apr-2017 06:00:00, NaN  
13-Apr-2017 07:00:00, NaN  
13-Apr-2017 08:00:00, NaN  
13-Apr-2017 09:00:00, NaN  
13-Apr-2017 10:00:00, NaN  
13-Apr-2017 11:00:00, NaN  
13-Apr-2017 12:00:00, NaN  
13-Apr-2017 13:00:00, NaN  
13-Apr-2017 14:00:00, NaN  
13-Apr-2017 15:00:00, NaN  
13-Apr-2017 16:00:00, NaN  
13-Apr-2017 17:00:00, NaN  
13-Apr-2017 18:00:00, NaN  
13-Apr-2017 19:00:00, NaN  
13-Apr-2017 20:00:00, NaN  
13-Apr-2017 21:00:00, NaN  
13-Apr-2017 22:00:00, NaN  
13-Apr-2017 23:00:00, NaN  
14-Apr-2017, NaN  
14-Apr-2017 01:00:00, NaN  
14-Apr-2017 02:00:00, NaN  
14-Apr-2017 03:00:00, NaN  
14-Apr-2017 04:00:00, NaN  
14-Apr-2017 05:00:00, NaN  
14-Apr-2017 06:00:00, NaN  
14-Apr-2017 07:00:00, NaN  
14-Apr-2017 08:00:00, NaN  
14-Apr-2017 09:00:00, NaN  
14-Apr-2017 10:00:00, NaN  
14-Apr-2017 11:00:00, NaN  
14-Apr-2017 12:00:00, NaN  
14-Apr-2017 13:00:00, NaN  
14-Apr-2017 14:00:00, NaN  
14-Apr-2017 15:00:00, NaN  
14-Apr-2017 16:00:00, NaN  
14-Apr-2017 17:00:00, NaN  
14-Apr-2017 18:00:00, NaN  
14-Apr-2017 19:00:00, NaN  
14-Apr-2017 20:00:00, NaN  
14-Apr-2017 21:00:00, NaN  
14-Apr-2017 22:00:00, NaN  
14-Apr-2017 23:00:00, NaN  
15-Apr-2017, NaN  
15-Apr-2017 01:00:00, NaN  
15-Apr-2017 02:00:00, NaN  
15-Apr-2017 03:00:00, NaN  
15-Apr-2017 04:00:00, NaN  
15-Apr-2017 05:00:00, NaN  
15-Apr-2017 06:00:00, NaN  
15-Apr-2017 07:00:00, NaN  
15-Apr-2017 08:00:00, NaN  
15-Apr-2017 09:00:00, NaN  
15-Apr-2017 10:00:00, NaN  
15-Apr-2017 11:00:00, NaN  
15-Apr-2017 12:00:00, NaN  
15-Apr-2017 13:00:00, NaN  
15-Apr-2017 14:00:00, NaN  
15-Apr-2017 15:00:00, NaN  
15-Apr-2017 16:00:00, NaN  
15-Apr-2017 17:00:00, NaN  
15-Apr-2017 18:00:00, NaN

15-Apr-2017 19:00:00, NaN  
15-Apr-2017 20:00:00, NaN  
15-Apr-2017 21:00:00, NaN  
15-Apr-2017 22:00:00, NaN  
15-Apr-2017 23:00:00, NaN  
16-Apr-2017, NaN  
16-Apr-2017 01:00:00, NaN  
16-Apr-2017 02:00:00, NaN  
16-Apr-2017 03:00:00, NaN  
16-Apr-2017 04:00:00, NaN  
16-Apr-2017 05:00:00, NaN  
16-Apr-2017 06:00:00, NaN  
16-Apr-2017 07:00:00, NaN  
16-Apr-2017 08:00:00, NaN  
16-Apr-2017 09:00:00, NaN  
16-Apr-2017 10:00:00, NaN  
16-Apr-2017 11:00:00, NaN  
16-Apr-2017 12:00:00, NaN  
16-Apr-2017 13:00:00, NaN  
16-Apr-2017 14:00:00, NaN  
16-Apr-2017 15:00:00, NaN  
16-Apr-2017 16:00:00, NaN  
16-Apr-2017 17:00:00, NaN  
16-Apr-2017 18:00:00, NaN  
16-Apr-2017 19:00:00, NaN  
16-Apr-2017 20:00:00, NaN  
16-Apr-2017 21:00:00, NaN  
16-Apr-2017 22:00:00, NaN  
16-Apr-2017 23:00:00, NaN  
17-Apr-2017, NaN  
17-Apr-2017 01:00:00, NaN  
17-Apr-2017 02:00:00, NaN  
17-Apr-2017 03:00:00, NaN  
17-Apr-2017 04:00:00, NaN  
17-Apr-2017 05:00:00, NaN  
17-Apr-2017 06:00:00, NaN  
17-Apr-2017 07:00:00, NaN  
17-Apr-2017 08:00:00, NaN  
17-Apr-2017 09:00:00, NaN  
17-Apr-2017 10:00:00, NaN  
17-Apr-2017 11:00:00, NaN  
17-Apr-2017 12:00:00, NaN  
17-Apr-2017 13:00:00, NaN  
17-Apr-2017 14:00:00, NaN  
17-Apr-2017 15:00:00, NaN  
17-Apr-2017 16:00:00, NaN  
17-Apr-2017 17:00:00, NaN  
17-Apr-2017 18:00:00, NaN  
17-Apr-2017 19:00:00, NaN  
17-Apr-2017 20:00:00, NaN  
17-Apr-2017 21:00:00, NaN  
17-Apr-2017 22:00:00, NaN  
17-Apr-2017 23:00:00, NaN  
18-Apr-2017, NaN  
18-Apr-2017 01:00:00, NaN  
18-Apr-2017 02:00:00, NaN  
18-Apr-2017 03:00:00, NaN  
18-Apr-2017 04:00:00, NaN  
18-Apr-2017 05:00:00, NaN  
18-Apr-2017 06:00:00, NaN  
18-Apr-2017 07:00:00, NaN  
18-Apr-2017 08:00:00, NaN  
18-Apr-2017 09:00:00, NaN  
18-Apr-2017 10:00:00, NaN

18-Apr-2017 11:00:00, NaN  
18-Apr-2017 12:00:00, NaN  
18-Apr-2017 13:00:00, NaN  
18-Apr-2017 14:00:00, NaN  
18-Apr-2017 15:00:00, NaN  
18-Apr-2017 16:00:00, NaN  
18-Apr-2017 17:00:00, NaN  
18-Apr-2017 18:00:00, NaN  
18-Apr-2017 19:00:00, NaN  
18-Apr-2017 20:00:00, NaN  
18-Apr-2017 21:00:00, NaN  
18-Apr-2017 22:00:00, NaN  
18-Apr-2017 23:00:00, NaN  
19-Apr-2017, NaN  
19-Apr-2017 01:00:00, NaN  
19-Apr-2017 02:00:00, NaN  
19-Apr-2017 03:00:00, NaN  
19-Apr-2017 04:00:00, NaN  
19-Apr-2017 05:00:00, NaN  
19-Apr-2017 06:00:00, NaN  
19-Apr-2017 07:00:00, NaN  
19-Apr-2017 08:00:00, NaN  
19-Apr-2017 09:00:00, NaN  
19-Apr-2017 10:00:00, NaN  
19-Apr-2017 11:00:00, NaN  
19-Apr-2017 12:00:00, NaN  
19-Apr-2017 13:00:00, NaN  
19-Apr-2017 14:00:00, NaN  
19-Apr-2017 15:00:00, NaN  
19-Apr-2017 16:00:00, NaN  
19-Apr-2017 17:00:00, NaN  
19-Apr-2017 18:00:00, NaN  
19-Apr-2017 19:00:00, NaN  
19-Apr-2017 20:00:00, NaN  
19-Apr-2017 21:00:00, NaN  
19-Apr-2017 22:00:00, NaN  
19-Apr-2017 23:00:00, NaN  
20-Apr-2017, NaN  
20-Apr-2017 01:00:00, NaN  
20-Apr-2017 02:00:00, NaN  
20-Apr-2017 03:00:00, NaN  
20-Apr-2017 04:00:00, NaN  
20-Apr-2017 05:00:00, NaN  
20-Apr-2017 06:00:00, NaN  
20-Apr-2017 07:00:00, NaN  
20-Apr-2017 08:00:00, NaN  
20-Apr-2017 09:00:00, NaN  
20-Apr-2017 10:00:00, NaN  
20-Apr-2017 11:00:00, NaN  
20-Apr-2017 12:00:00, NaN  
20-Apr-2017 13:00:00, NaN  
20-Apr-2017 14:00:00, NaN  
20-Apr-2017 15:00:00, NaN  
20-Apr-2017 16:00:00, NaN  
20-Apr-2017 17:00:00, NaN  
20-Apr-2017 18:00:00, NaN  
20-Apr-2017 19:00:00, NaN  
20-Apr-2017 20:00:00, NaN  
20-Apr-2017 21:00:00, NaN  
20-Apr-2017 22:00:00, NaN  
20-Apr-2017 23:00:00, NaN  
21-Apr-2017, NaN  
21-Apr-2017 01:00:00, NaN  
21-Apr-2017 02:00:00, NaN

21-Apr-2017 03:00:00, NaN  
21-Apr-2017 04:00:00, NaN  
21-Apr-2017 05:00:00, NaN  
21-Apr-2017 06:00:00, NaN  
21-Apr-2017 07:00:00, NaN  
21-Apr-2017 08:00:00, NaN  
21-Apr-2017 09:00:00, NaN  
21-Apr-2017 10:00:00, NaN  
21-Apr-2017 11:00:00, NaN  
21-Apr-2017 12:00:00, NaN  
21-Apr-2017 13:00:00, NaN  
21-Apr-2017 14:00:00, NaN  
21-Apr-2017 15:00:00, NaN  
21-Apr-2017 16:00:00, NaN  
21-Apr-2017 17:00:00, NaN  
21-Apr-2017 18:00:00, NaN  
21-Apr-2017 19:00:00, NaN  
21-Apr-2017 20:00:00, NaN  
21-Apr-2017 21:00:00, NaN  
21-Apr-2017 22:00:00, NaN  
21-Apr-2017 23:00:00, NaN  
22-Apr-2017, NaN  
22-Apr-2017 01:00:00, NaN  
22-Apr-2017 02:00:00, NaN  
22-Apr-2017 03:00:00, NaN  
22-Apr-2017 04:00:00, NaN  
22-Apr-2017 05:00:00, NaN  
22-Apr-2017 06:00:00, NaN  
22-Apr-2017 07:00:00, NaN  
22-Apr-2017 08:00:00, NaN  
22-Apr-2017 09:00:00, NaN  
22-Apr-2017 10:00:00, NaN  
22-Apr-2017 11:00:00, NaN  
22-Apr-2017 12:00:00, NaN  
22-Apr-2017 13:00:00, NaN  
22-Apr-2017 14:00:00, NaN  
22-Apr-2017 15:00:00, NaN  
22-Apr-2017 16:00:00, NaN  
22-Apr-2017 17:00:00, NaN  
22-Apr-2017 18:00:00, NaN  
22-Apr-2017 19:00:00, NaN  
22-Apr-2017 20:00:00, NaN  
22-Apr-2017 21:00:00, NaN  
22-Apr-2017 22:00:00, NaN  
22-Apr-2017 23:00:00, NaN  
23-Apr-2017, NaN  
23-Apr-2017 01:00:00, NaN  
23-Apr-2017 02:00:00, NaN  
23-Apr-2017 03:00:00, NaN  
23-Apr-2017 04:00:00, NaN  
23-Apr-2017 05:00:00, NaN  
23-Apr-2017 06:00:00, NaN  
23-Apr-2017 07:00:00, NaN  
23-Apr-2017 08:00:00, NaN  
23-Apr-2017 09:00:00, NaN  
23-Apr-2017 10:00:00, NaN  
23-Apr-2017 11:00:00, NaN  
23-Apr-2017 12:00:00, NaN  
23-Apr-2017 13:00:00, NaN  
23-Apr-2017 14:00:00, NaN  
23-Apr-2017 15:00:00, NaN  
23-Apr-2017 16:00:00, NaN  
23-Apr-2017 17:00:00, NaN  
23-Apr-2017 18:00:00, NaN

23-Apr-2017 19:00:00, NaN  
23-Apr-2017 20:00:00, NaN  
23-Apr-2017 21:00:00, NaN  
23-Apr-2017 22:00:00, NaN  
23-Apr-2017 23:00:00, NaN  
24-Apr-2017, NaN  
24-Apr-2017 01:00:00, NaN  
24-Apr-2017 02:00:00, NaN  
24-Apr-2017 03:00:00, NaN  
24-Apr-2017 04:00:00, NaN  
24-Apr-2017 05:00:00, NaN  
24-Apr-2017 06:00:00, NaN  
24-Apr-2017 07:00:00, NaN  
24-Apr-2017 08:00:00, NaN  
24-Apr-2017 09:00:00, NaN  
24-Apr-2017 10:00:00, NaN  
24-Apr-2017 11:00:00, NaN  
24-Apr-2017 12:00:00, NaN  
24-Apr-2017 13:00:00, NaN  
24-Apr-2017 14:00:00, NaN  
24-Apr-2017 15:00:00, NaN  
24-Apr-2017 16:00:00, NaN  
24-Apr-2017 17:00:00, NaN  
24-Apr-2017 18:00:00, NaN  
24-Apr-2017 19:00:00, NaN  
24-Apr-2017 20:00:00, NaN  
24-Apr-2017 21:00:00, NaN  
24-Apr-2017 22:00:00, NaN  
24-Apr-2017 23:00:00, NaN  
25-Apr-2017, NaN  
25-Apr-2017 01:00:00, NaN  
25-Apr-2017 02:00:00, NaN  
25-Apr-2017 03:00:00, NaN  
25-Apr-2017 04:00:00, NaN  
25-Apr-2017 05:00:00, NaN  
25-Apr-2017 06:00:00, NaN  
25-Apr-2017 07:00:00, NaN  
25-Apr-2017 08:00:00, NaN  
25-Apr-2017 09:00:00, NaN  
25-Apr-2017 10:00:00, NaN  
25-Apr-2017 11:00:00, NaN  
25-Apr-2017 12:00:00, NaN  
25-Apr-2017 13:00:00, NaN  
25-Apr-2017 14:00:00, NaN  
25-Apr-2017 15:00:00, NaN  
25-Apr-2017 16:00:00, NaN  
25-Apr-2017 17:00:00, NaN  
25-Apr-2017 18:00:00, NaN  
25-Apr-2017 19:00:00, NaN  
25-Apr-2017 20:00:00, NaN  
25-Apr-2017 21:00:00, NaN  
25-Apr-2017 22:00:00, NaN  
25-Apr-2017 23:00:00, NaN  
26-Apr-2017, NaN  
26-Apr-2017 01:00:00, NaN  
26-Apr-2017 02:00:00, NaN  
26-Apr-2017 03:00:00, NaN  
26-Apr-2017 04:00:00, NaN  
26-Apr-2017 05:00:00, NaN  
26-Apr-2017 06:00:00, NaN  
26-Apr-2017 07:00:00, NaN  
26-Apr-2017 08:00:00, NaN  
26-Apr-2017 09:00:00, NaN  
26-Apr-2017 10:00:00, NaN

26-Apr-2017 11:00:00, NaN  
26-Apr-2017 12:00:00, NaN  
26-Apr-2017 13:00:00, NaN  
26-Apr-2017 14:00:00, NaN  
26-Apr-2017 15:00:00, NaN  
26-Apr-2017 16:00:00, NaN  
26-Apr-2017 17:00:00, NaN  
26-Apr-2017 18:00:00, NaN  
26-Apr-2017 19:00:00, NaN  
26-Apr-2017 20:00:00, NaN  
26-Apr-2017 21:00:00, NaN  
26-Apr-2017 22:00:00, NaN  
26-Apr-2017 23:00:00, NaN  
27-Apr-2017, NaN  
27-Apr-2017 01:00:00, NaN  
27-Apr-2017 02:00:00, NaN  
27-Apr-2017 03:00:00, NaN  
27-Apr-2017 04:00:00, NaN  
27-Apr-2017 05:00:00, NaN  
27-Apr-2017 06:00:00, NaN  
27-Apr-2017 07:00:00, NaN  
27-Apr-2017 08:00:00, NaN  
27-Apr-2017 09:00:00, NaN  
27-Apr-2017 10:00:00, NaN  
27-Apr-2017 11:00:00, NaN  
27-Apr-2017 12:00:00, NaN  
27-Apr-2017 13:00:00, NaN  
27-Apr-2017 14:00:00, NaN  
27-Apr-2017 15:00:00, NaN  
27-Apr-2017 16:00:00, NaN  
27-Apr-2017 17:00:00, NaN  
27-Apr-2017 18:00:00, NaN  
27-Apr-2017 19:00:00, NaN  
27-Apr-2017 20:00:00, NaN  
27-Apr-2017 21:00:00, NaN  
27-Apr-2017 22:00:00, NaN  
27-Apr-2017 23:00:00, NaN  
28-Apr-2017, NaN  
28-Apr-2017 01:00:00, NaN  
28-Apr-2017 02:00:00, NaN  
28-Apr-2017 03:00:00, NaN  
28-Apr-2017 04:00:00, NaN  
28-Apr-2017 05:00:00, NaN  
28-Apr-2017 06:00:00, NaN  
28-Apr-2017 07:00:00, NaN  
28-Apr-2017 08:00:00, NaN  
28-Apr-2017 09:00:00, NaN  
28-Apr-2017 10:00:00, NaN  
28-Apr-2017 11:00:00, NaN  
28-Apr-2017 12:00:00, NaN  
28-Apr-2017 13:00:00, NaN  
28-Apr-2017 14:00:00, NaN  
28-Apr-2017 15:00:00, NaN  
28-Apr-2017 16:00:00, NaN  
28-Apr-2017 17:00:00, NaN  
28-Apr-2017 18:00:00, NaN  
28-Apr-2017 19:00:00, NaN  
28-Apr-2017 20:00:00, NaN  
28-Apr-2017 21:00:00, NaN  
28-Apr-2017 22:00:00, NaN  
28-Apr-2017 23:00:00, NaN  
29-Apr-2017, NaN  
29-Apr-2017 01:00:00, NaN  
29-Apr-2017 02:00:00, NaN

29-Apr-2017 03:00:00, NaN  
29-Apr-2017 04:00:00, NaN  
29-Apr-2017 05:00:00, NaN  
29-Apr-2017 06:00:00, NaN  
29-Apr-2017 07:00:00, NaN  
29-Apr-2017 08:00:00, NaN  
29-Apr-2017 09:00:00, NaN  
29-Apr-2017 10:00:00, NaN  
29-Apr-2017 11:00:00, NaN  
29-Apr-2017 12:00:00, NaN  
29-Apr-2017 13:00:00, NaN  
29-Apr-2017 14:00:00, NaN  
29-Apr-2017 15:00:00, NaN  
29-Apr-2017 16:00:00, NaN  
29-Apr-2017 17:00:00, NaN  
29-Apr-2017 18:00:00, NaN  
29-Apr-2017 19:00:00, NaN  
29-Apr-2017 20:00:00, NaN  
29-Apr-2017 21:00:00, NaN  
29-Apr-2017 22:00:00, NaN  
29-Apr-2017 23:00:00, NaN  
30-Apr-2017, NaN  
30-Apr-2017 01:00:00, NaN  
30-Apr-2017 02:00:00, NaN  
30-Apr-2017 03:00:00, NaN  
30-Apr-2017 04:00:00, NaN  
30-Apr-2017 05:00:00, NaN  
30-Apr-2017 06:00:00, NaN  
30-Apr-2017 07:00:00, NaN  
30-Apr-2017 08:00:00, NaN  
30-Apr-2017 09:00:00, NaN  
30-Apr-2017 10:00:00, NaN  
30-Apr-2017 11:00:00, NaN  
30-Apr-2017 12:00:00, NaN  
30-Apr-2017 13:00:00, NaN  
30-Apr-2017 14:00:00, NaN  
30-Apr-2017 15:00:00, NaN  
30-Apr-2017 16:00:00, NaN  
30-Apr-2017 17:00:00, NaN  
30-Apr-2017 18:00:00, NaN  
30-Apr-2017 19:00:00, NaN  
30-Apr-2017 20:00:00, NaN  
30-Apr-2017 21:00:00, NaN  
30-Apr-2017 22:00:00, NaN  
30-Apr-2017 23:00:00, NaN  
01-May-2017, NaN  
01-May-2017 01:00:00, NaN  
01-May-2017 02:00:00, NaN  
01-May-2017 03:00:00, NaN  
01-May-2017 04:00:00, NaN  
01-May-2017 05:00:00, NaN  
01-May-2017 06:00:00, NaN  
01-May-2017 07:00:00, NaN  
01-May-2017 08:00:00, NaN  
01-May-2017 09:00:00, NaN  
01-May-2017 10:00:00, NaN  
01-May-2017 11:00:00, NaN  
01-May-2017 12:00:00, NaN  
01-May-2017 13:00:00, NaN  
01-May-2017 14:00:00, NaN  
01-May-2017 15:00:00, NaN  
01-May-2017 16:00:00, NaN  
01-May-2017 17:00:00, NaN  
01-May-2017 18:00:00, NaN



01-May-2017 19:00:00, NaN  
01-May-2017 20:00:00, NaN  
01-May-2017 21:00:00, NaN  
01-May-2017 22:00:00, NaN  
01-May-2017 23:00:00, NaN  
02-May-2017, NaN  
02-May-2017 01:00:00, NaN  
02-May-2017 02:00:00, NaN  
02-May-2017 03:00:00, NaN  
02-May-2017 04:00:00, NaN  
02-May-2017 05:00:00, NaN  
02-May-2017 06:00:00, NaN  
02-May-2017 07:00:00, NaN  
02-May-2017 08:00:00, NaN  
02-May-2017 09:00:00, NaN  
02-May-2017 10:00:00, NaN  
02-May-2017 11:00:00, NaN  
02-May-2017 12:00:00, NaN  
02-May-2017 13:00:00, NaN  
02-May-2017 14:00:00, NaN  
02-May-2017 15:00:00, NaN  
02-May-2017 16:00:00, NaN  
02-May-2017 17:00:00, NaN  
02-May-2017 18:00:00, NaN  
02-May-2017 19:00:00, NaN  
02-May-2017 20:00:00, NaN  
02-May-2017 21:00:00, NaN  
02-May-2017 22:00:00, NaN  
02-May-2017 23:00:00, NaN  
03-May-2017, NaN  
03-May-2017 01:00:00, NaN  
03-May-2017 02:00:00, NaN  
03-May-2017 03:00:00, NaN  
03-May-2017 04:00:00, NaN  
03-May-2017 05:00:00, NaN  
03-May-2017 06:00:00, NaN  
03-May-2017 07:00:00, NaN  
03-May-2017 08:00:00, NaN  
03-May-2017 09:00:00, NaN  
03-May-2017 10:00:00, NaN  
03-May-2017 11:00:00, NaN  
03-May-2017 12:00:00, NaN  
03-May-2017 13:00:00, NaN  
03-May-2017 14:00:00, NaN  
03-May-2017 15:00:00, NaN  
03-May-2017 16:00:00, NaN  
03-May-2017 17:00:00, NaN  
03-May-2017 18:00:00, NaN  
03-May-2017 19:00:00, NaN  
03-May-2017 20:00:00, NaN  
03-May-2017 21:00:00, NaN  
03-May-2017 22:00:00, NaN  
03-May-2017 23:00:00, NaN  
04-May-2017, NaN  
04-May-2017 01:00:00, NaN  
04-May-2017 02:00:00, NaN  
04-May-2017 03:00:00, NaN  
04-May-2017 04:00:00, NaN  
04-May-2017 05:00:00, NaN  
04-May-2017 06:00:00, NaN  
04-May-2017 07:00:00, NaN  
04-May-2017 08:00:00, NaN  
04-May-2017 09:00:00, NaN  
04-May-2017 10:00:00, NaN

04-May-2017 11:00:00, NaN  
04-May-2017 12:00:00, NaN  
04-May-2017 13:00:00, NaN  
04-May-2017 14:00:00, NaN  
04-May-2017 15:00:00, NaN  
04-May-2017 16:00:00, NaN  
04-May-2017 17:00:00, NaN  
04-May-2017 18:00:00, NaN  
04-May-2017 19:00:00, NaN  
04-May-2017 20:00:00, NaN  
04-May-2017 21:00:00, NaN  
04-May-2017 22:00:00, NaN  
04-May-2017 23:00:00, NaN  
05-May-2017, NaN  
05-May-2017 01:00:00, NaN  
05-May-2017 02:00:00, NaN  
05-May-2017 03:00:00, NaN  
05-May-2017 04:00:00, NaN  
05-May-2017 05:00:00, NaN  
05-May-2017 06:00:00, NaN  
05-May-2017 07:00:00, NaN  
05-May-2017 08:00:00, NaN  
05-May-2017 09:00:00, NaN  
05-May-2017 10:00:00, NaN  
05-May-2017 11:00:00, NaN  
05-May-2017 12:00:00, NaN  
05-May-2017 13:00:00, NaN  
05-May-2017 14:00:00, NaN  
05-May-2017 15:00:00, NaN  
05-May-2017 16:00:00, NaN  
05-May-2017 17:00:00, NaN  
05-May-2017 18:00:00, NaN  
05-May-2017 19:00:00, NaN  
05-May-2017 20:00:00, NaN  
05-May-2017 21:00:00, NaN  
05-May-2017 22:00:00, NaN  
05-May-2017 23:00:00, NaN  
06-May-2017, NaN  
06-May-2017 01:00:00, NaN  
06-May-2017 02:00:00, NaN  
06-May-2017 03:00:00, NaN  
06-May-2017 04:00:00, NaN  
06-May-2017 05:00:00, NaN  
06-May-2017 06:00:00, NaN  
06-May-2017 07:00:00, NaN  
06-May-2017 08:00:00, NaN  
06-May-2017 09:00:00, NaN  
06-May-2017 10:00:00, NaN  
06-May-2017 11:00:00, NaN  
06-May-2017 12:00:00, NaN  
06-May-2017 13:00:00, NaN  
06-May-2017 14:00:00, NaN  
06-May-2017 15:00:00, NaN  
06-May-2017 16:00:00, NaN  
06-May-2017 17:00:00, NaN  
06-May-2017 18:00:00, NaN  
06-May-2017 19:00:00, NaN  
06-May-2017 20:00:00, NaN  
06-May-2017 21:00:00, NaN  
06-May-2017 22:00:00, NaN  
06-May-2017 23:00:00, NaN  
07-May-2017, NaN  
07-May-2017 01:00:00, NaN  
07-May-2017 02:00:00, NaN

07-May-2017 03:00:00, NaN  
07-May-2017 04:00:00, NaN  
07-May-2017 05:00:00, NaN  
07-May-2017 06:00:00, NaN  
07-May-2017 07:00:00, NaN  
07-May-2017 08:00:00, NaN  
07-May-2017 09:00:00, NaN  
07-May-2017 10:00:00, NaN  
07-May-2017 11:00:00, NaN  
07-May-2017 12:00:00, NaN  
07-May-2017 13:00:00, NaN  
07-May-2017 14:00:00, NaN  
07-May-2017 15:00:00, NaN  
07-May-2017 16:00:00, NaN  
07-May-2017 17:00:00, NaN  
07-May-2017 18:00:00, NaN  
07-May-2017 19:00:00, NaN  
07-May-2017 20:00:00, NaN  
07-May-2017 21:00:00, NaN  
07-May-2017 22:00:00, NaN  
07-May-2017 23:00:00, NaN  
08-May-2017, NaN  
08-May-2017 01:00:00, NaN  
08-May-2017 02:00:00, NaN  
08-May-2017 03:00:00, NaN  
08-May-2017 04:00:00, NaN  
08-May-2017 05:00:00, NaN  
08-May-2017 06:00:00, NaN  
08-May-2017 07:00:00, NaN  
08-May-2017 08:00:00, NaN  
08-May-2017 09:00:00, NaN  
08-May-2017 10:00:00, NaN  
08-May-2017 11:00:00, NaN  
08-May-2017 12:00:00, NaN  
08-May-2017 13:00:00, NaN  
08-May-2017 14:00:00, NaN  
08-May-2017 15:00:00, NaN  
08-May-2017 16:00:00, NaN  
08-May-2017 17:00:00, NaN  
08-May-2017 18:00:00, NaN  
08-May-2017 19:00:00, NaN  
08-May-2017 20:00:00, NaN  
08-May-2017 21:00:00, NaN  
08-May-2017 22:00:00, NaN  
08-May-2017 23:00:00, NaN  
09-May-2017, NaN  
09-May-2017 01:00:00, NaN  
09-May-2017 02:00:00, NaN  
09-May-2017 03:00:00, NaN  
09-May-2017 04:00:00, NaN  
09-May-2017 05:00:00, NaN  
09-May-2017 06:00:00, NaN  
09-May-2017 07:00:00, NaN  
09-May-2017 08:00:00, NaN  
09-May-2017 09:00:00, NaN  
09-May-2017 10:00:00, NaN  
09-May-2017 11:00:00, NaN  
09-May-2017 12:00:00, NaN  
09-May-2017 13:00:00, NaN  
09-May-2017 14:00:00, NaN  
09-May-2017 15:00:00, NaN  
09-May-2017 16:00:00, NaN  
09-May-2017 17:00:00, NaN  
09-May-2017 18:00:00, NaN

09-May-2017 19:00:00, NaN  
09-May-2017 20:00:00, NaN  
09-May-2017 21:00:00, NaN  
09-May-2017 22:00:00, NaN  
09-May-2017 23:00:00, NaN  
10-May-2017, NaN  
10-May-2017 01:00:00, NaN  
10-May-2017 02:00:00, NaN  
10-May-2017 03:00:00, NaN  
10-May-2017 04:00:00, NaN  
10-May-2017 05:00:00, NaN  
10-May-2017 06:00:00, NaN  
10-May-2017 07:00:00, NaN  
10-May-2017 08:00:00, NaN  
10-May-2017 09:00:00, NaN  
10-May-2017 10:00:00, NaN  
10-May-2017 11:00:00, NaN  
10-May-2017 12:00:00, NaN  
10-May-2017 13:00:00, NaN  
10-May-2017 14:00:00, NaN  
10-May-2017 15:00:00, NaN  
10-May-2017 16:00:00, NaN  
10-May-2017 17:00:00, NaN  
10-May-2017 18:00:00, NaN  
10-May-2017 19:00:00, NaN  
10-May-2017 20:00:00, NaN  
10-May-2017 21:00:00, NaN  
10-May-2017 22:00:00, NaN  
10-May-2017 23:00:00, NaN  
11-May-2017, NaN  
11-May-2017 01:00:00, NaN  
11-May-2017 02:00:00, NaN  
11-May-2017 03:00:00, NaN  
11-May-2017 04:00:00, NaN  
11-May-2017 05:00:00, NaN  
11-May-2017 06:00:00, NaN  
11-May-2017 07:00:00, NaN  
11-May-2017 08:00:00, NaN  
11-May-2017 09:00:00, NaN  
11-May-2017 10:00:00, NaN  
11-May-2017 11:00:00, NaN  
11-May-2017 12:00:00, NaN  
11-May-2017 13:00:00, NaN  
11-May-2017 14:00:00, NaN  
11-May-2017 15:00:00, NaN  
11-May-2017 16:00:00, NaN  
11-May-2017 17:00:00, NaN  
11-May-2017 18:00:00, NaN  
11-May-2017 19:00:00, NaN  
11-May-2017 20:00:00, NaN  
11-May-2017 21:00:00, NaN  
11-May-2017 22:00:00, NaN  
11-May-2017 23:00:00, NaN  
12-May-2017, NaN  
12-May-2017 01:00:00, NaN  
12-May-2017 02:00:00, NaN  
12-May-2017 03:00:00, NaN  
12-May-2017 04:00:00, NaN  
12-May-2017 05:00:00, NaN  
12-May-2017 06:00:00, NaN  
12-May-2017 07:00:00, NaN  
12-May-2017 08:00:00, NaN  
12-May-2017 09:00:00, NaN  
12-May-2017 10:00:00, NaN

12-May-2017 11:00:00, NaN  
12-May-2017 12:00:00, NaN  
12-May-2017 13:00:00, NaN  
12-May-2017 14:00:00, NaN  
12-May-2017 15:00:00, NaN  
12-May-2017 16:00:00, NaN  
12-May-2017 17:00:00, NaN  
12-May-2017 18:00:00, NaN  
12-May-2017 19:00:00, NaN  
12-May-2017 20:00:00, NaN  
12-May-2017 21:00:00, NaN  
12-May-2017 22:00:00, NaN  
12-May-2017 23:00:00, NaN  
13-May-2017, NaN  
13-May-2017 01:00:00, NaN  
13-May-2017 02:00:00, NaN  
13-May-2017 03:00:00, NaN  
13-May-2017 04:00:00, NaN  
13-May-2017 05:00:00, NaN  
13-May-2017 06:00:00, NaN  
13-May-2017 07:00:00, NaN  
13-May-2017 08:00:00, NaN  
13-May-2017 09:00:00, NaN  
13-May-2017 10:00:00, NaN  
13-May-2017 11:00:00, NaN  
13-May-2017 12:00:00, NaN  
13-May-2017 13:00:00, NaN  
13-May-2017 14:00:00, NaN  
13-May-2017 15:00:00, NaN  
13-May-2017 16:00:00, NaN  
13-May-2017 17:00:00, NaN  
13-May-2017 18:00:00, NaN  
13-May-2017 19:00:00, NaN  
13-May-2017 20:00:00, NaN  
13-May-2017 21:00:00, NaN  
13-May-2017 22:00:00, NaN  
13-May-2017 23:00:00, NaN  
14-May-2017, NaN  
14-May-2017 01:00:00, NaN  
14-May-2017 02:00:00, NaN  
14-May-2017 03:00:00, NaN  
14-May-2017 04:00:00, NaN  
14-May-2017 05:00:00, NaN  
14-May-2017 06:00:00, NaN  
14-May-2017 07:00:00, NaN  
14-May-2017 08:00:00, NaN  
14-May-2017 09:00:00, NaN  
14-May-2017 10:00:00, NaN  
14-May-2017 11:00:00, NaN  
14-May-2017 12:00:00, NaN  
14-May-2017 13:00:00, NaN  
14-May-2017 14:00:00, NaN  
14-May-2017 15:00:00, NaN  
14-May-2017 16:00:00, NaN  
14-May-2017 17:00:00, NaN  
14-May-2017 18:00:00, NaN  
14-May-2017 19:00:00, NaN  
14-May-2017 20:00:00, NaN  
14-May-2017 21:00:00, NaN  
14-May-2017 22:00:00, NaN  
14-May-2017 23:00:00, NaN  
15-May-2017, NaN  
15-May-2017 01:00:00, NaN  
15-May-2017 02:00:00, NaN

15-May-2017 03:00:00, NaN  
15-May-2017 04:00:00, NaN  
15-May-2017 05:00:00, NaN  
15-May-2017 06:00:00, NaN  
15-May-2017 07:00:00, NaN  
15-May-2017 08:00:00, NaN  
15-May-2017 09:00:00, NaN  
15-May-2017 10:00:00, NaN  
15-May-2017 11:00:00, NaN  
15-May-2017 12:00:00, NaN  
15-May-2017 13:00:00, NaN  
15-May-2017 14:00:00, NaN  
15-May-2017 15:00:00, NaN  
15-May-2017 16:00:00, NaN  
15-May-2017 17:00:00, NaN  
15-May-2017 18:00:00, NaN  
15-May-2017 19:00:00, NaN  
15-May-2017 20:00:00, NaN  
15-May-2017 21:00:00, NaN  
15-May-2017 22:00:00, NaN  
15-May-2017 23:00:00, NaN  
16-May-2017, NaN  
16-May-2017 01:00:00, NaN  
16-May-2017 02:00:00, NaN  
16-May-2017 03:00:00, NaN  
16-May-2017 04:00:00, NaN  
16-May-2017 05:00:00, NaN  
16-May-2017 06:00:00, NaN  
16-May-2017 07:00:00, NaN  
16-May-2017 08:00:00, NaN  
16-May-2017 09:00:00, NaN  
16-May-2017 10:00:00, NaN  
16-May-2017 11:00:00, NaN  
16-May-2017 12:00:00, NaN  
16-May-2017 13:00:00, NaN  
16-May-2017 14:00:00, NaN  
16-May-2017 15:00:00, NaN  
16-May-2017 16:00:00, NaN  
16-May-2017 17:00:00, NaN  
16-May-2017 18:00:00, NaN  
16-May-2017 19:00:00, NaN  
16-May-2017 20:00:00, NaN  
16-May-2017 21:00:00, NaN  
16-May-2017 22:00:00, NaN  
16-May-2017 23:00:00, NaN  
17-May-2017, NaN  
17-May-2017 01:00:00, NaN  
17-May-2017 02:00:00, NaN  
17-May-2017 03:00:00, NaN  
17-May-2017 04:00:00, NaN  
17-May-2017 05:00:00, NaN  
17-May-2017 06:00:00, NaN  
17-May-2017 07:00:00, NaN  
17-May-2017 08:00:00, NaN  
17-May-2017 09:00:00, NaN  
17-May-2017 10:00:00, NaN  
17-May-2017 11:00:00, NaN  
17-May-2017 12:00:00, NaN  
17-May-2017 13:00:00, NaN  
17-May-2017 14:00:00, NaN  
17-May-2017 15:00:00, NaN  
17-May-2017 16:00:00, NaN  
17-May-2017 17:00:00, NaN  
17-May-2017 18:00:00, NaN

17-May-2017 19:00:00, NaN  
17-May-2017 20:00:00, NaN  
17-May-2017 21:00:00, NaN  
17-May-2017 22:00:00, NaN  
17-May-2017 23:00:00, NaN  
18-May-2017, NaN  
18-May-2017 01:00:00, NaN  
18-May-2017 02:00:00, NaN  
18-May-2017 03:00:00, NaN  
18-May-2017 04:00:00, NaN  
18-May-2017 05:00:00, NaN  
18-May-2017 06:00:00, NaN  
18-May-2017 07:00:00, NaN  
18-May-2017 08:00:00, NaN  
18-May-2017 09:00:00, NaN  
18-May-2017 10:00:00, NaN  
18-May-2017 11:00:00, NaN  
18-May-2017 12:00:00, NaN  
18-May-2017 13:00:00, NaN  
18-May-2017 14:00:00, NaN  
18-May-2017 15:00:00, NaN  
18-May-2017 16:00:00, NaN  
18-May-2017 17:00:00, NaN  
18-May-2017 18:00:00, NaN  
18-May-2017 19:00:00, NaN  
18-May-2017 20:00:00, NaN  
18-May-2017 21:00:00, NaN  
18-May-2017 22:00:00, NaN  
18-May-2017 23:00:00, NaN  
19-May-2017, NaN  
19-May-2017 01:00:00, NaN  
19-May-2017 02:00:00, NaN  
19-May-2017 03:00:00, NaN  
19-May-2017 04:00:00, NaN  
19-May-2017 05:00:00, NaN  
19-May-2017 06:00:00, NaN  
19-May-2017 07:00:00, NaN  
19-May-2017 08:00:00, NaN  
19-May-2017 09:00:00, NaN  
19-May-2017 10:00:00, NaN  
19-May-2017 11:00:00, NaN  
19-May-2017 12:00:00, NaN  
19-May-2017 13:00:00, NaN  
19-May-2017 14:00:00, NaN  
19-May-2017 15:00:00, NaN  
19-May-2017 16:00:00, NaN  
19-May-2017 17:00:00, NaN  
19-May-2017 18:00:00, NaN  
19-May-2017 19:00:00, NaN  
19-May-2017 20:00:00, NaN  
19-May-2017 21:00:00, NaN  
19-May-2017 22:00:00, NaN  
19-May-2017 23:00:00, NaN  
20-May-2017, NaN  
20-May-2017 01:00:00, NaN  
20-May-2017 02:00:00, NaN  
20-May-2017 03:00:00, NaN  
20-May-2017 04:00:00, NaN  
20-May-2017 05:00:00, NaN  
20-May-2017 06:00:00, NaN  
20-May-2017 07:00:00, NaN  
20-May-2017 08:00:00, NaN  
20-May-2017 09:00:00, NaN  
20-May-2017 10:00:00, NaN

20-May-2017 11:00:00, NaN  
20-May-2017 12:00:00, NaN  
20-May-2017 13:00:00, NaN  
20-May-2017 14:00:00, NaN  
20-May-2017 15:00:00, NaN  
20-May-2017 16:00:00, NaN  
20-May-2017 17:00:00, NaN  
20-May-2017 18:00:00, NaN  
20-May-2017 19:00:00, NaN  
20-May-2017 20:00:00, NaN  
20-May-2017 21:00:00, NaN  
20-May-2017 22:00:00, NaN  
20-May-2017 23:00:00, NaN  
21-May-2017, NaN  
21-May-2017 01:00:00, NaN  
21-May-2017 02:00:00, NaN  
21-May-2017 03:00:00, NaN  
21-May-2017 04:00:00, NaN  
21-May-2017 05:00:00, NaN  
21-May-2017 06:00:00, NaN  
21-May-2017 07:00:00, NaN  
21-May-2017 08:00:00, NaN  
21-May-2017 09:00:00, NaN  
21-May-2017 10:00:00, NaN  
21-May-2017 11:00:00, NaN  
21-May-2017 12:00:00, NaN  
21-May-2017 13:00:00, NaN  
21-May-2017 14:00:00, NaN  
21-May-2017 15:00:00, NaN  
21-May-2017 16:00:00, NaN  
21-May-2017 17:00:00, NaN  
21-May-2017 18:00:00, NaN  
21-May-2017 19:00:00, NaN  
21-May-2017 20:00:00, NaN  
21-May-2017 21:00:00, NaN  
21-May-2017 22:00:00, NaN  
21-May-2017 23:00:00, NaN  
22-May-2017, NaN  
22-May-2017 01:00:00, NaN  
22-May-2017 02:00:00, NaN  
22-May-2017 03:00:00, NaN  
22-May-2017 04:00:00, NaN  
22-May-2017 05:00:00, NaN  
22-May-2017 06:00:00, NaN  
22-May-2017 07:00:00, NaN  
22-May-2017 08:00:00, NaN  
22-May-2017 09:00:00, NaN  
22-May-2017 10:00:00, NaN  
22-May-2017 11:00:00, NaN  
22-May-2017 12:00:00, NaN  
22-May-2017 13:00:00, NaN  
22-May-2017 14:00:00, NaN  
22-May-2017 15:00:00, NaN  
22-May-2017 16:00:00, NaN  
22-May-2017 17:00:00, NaN  
22-May-2017 18:00:00, NaN  
22-May-2017 19:00:00, NaN  
22-May-2017 20:00:00, NaN  
22-May-2017 21:00:00, NaN  
22-May-2017 22:00:00, NaN  
22-May-2017 23:00:00, NaN  
23-May-2017, NaN  
23-May-2017 01:00:00, NaN  
23-May-2017 02:00:00, NaN



|              |           |     |
|--------------|-----------|-----|
| 23-May-2017  | 03:00:00, | NaN |
| 23-May-2017  | 04:00:00, | NaN |
| 23-May-2017  | 05:00:00, | NaN |
| 23-May-2017  | 06:00:00, | NaN |
| 23-May-2017  | 07:00:00, | NaN |
| 23-May-2017  | 08:00:00, | NaN |
| 23-May-2017  | 09:00:00, | NaN |
| 23-May-2017  | 10:00:00, | NaN |
| 23-May-2017  | 11:00:00, | NaN |
| 23-May-2017  | 12:00:00, | NaN |
| 23-May-2017  | 13:00:00, | NaN |
| 23-May-2017  | 14:00:00, | NaN |
| 23-May-2017  | 15:00:00, | NaN |
| 23-May-2017  | 16:00:00, | NaN |
| 23-May-2017  | 17:00:00, | NaN |
| 23-May-2017  | 18:00:00, | NaN |
| 23-May-2017  | 19:00:00, | NaN |
| 23-May-2017  | 20:00:00, | NaN |
| 23-May-2017  | 21:00:00, | NaN |
| 23-May-2017  | 22:00:00, | NaN |
| 23-May-2017  | 23:00:00, | NaN |
| 24-May-2017, | NaN       |     |
| 24-May-2017  | 01:00:00, | NaN |
| 24-May-2017  | 02:00:00, | NaN |
| 24-May-2017  | 03:00:00, | NaN |
| 24-May-2017  | 04:00:00, | NaN |
| 24-May-2017  | 05:00:00, | NaN |
| 24-May-2017  | 06:00:00, | NaN |
| 24-May-2017  | 07:00:00, | NaN |
| 24-May-2017  | 08:00:00, | NaN |
| 24-May-2017  | 09:00:00, | NaN |
| 24-May-2017  | 10:00:00, | NaN |
| 24-May-2017  | 11:00:00, | NaN |
| 24-May-2017  | 12:00:00, | NaN |
| 24-May-2017  | 13:00:00, | NaN |
| 24-May-2017  | 14:00:00, | NaN |
| 24-May-2017  | 15:00:00, | NaN |
| 24-May-2017  | 16:00:00, | NaN |
| 24-May-2017  | 17:00:00, | NaN |
| 24-May-2017  | 18:00:00, | NaN |
| 24-May-2017  | 19:00:00, | NaN |
| 24-May-2017  | 20:00:00, | NaN |
| 24-May-2017  | 21:00:00, | NaN |
| 24-May-2017  | 22:00:00, | NaN |
| 24-May-2017  | 23:00:00, | NaN |
| 25-May-2017, | NaN       |     |
| 25-May-2017  | 01:00:00, | NaN |
| 25-May-2017  | 02:00:00, | NaN |
| 25-May-2017  | 03:00:00, | NaN |
| 25-May-2017  | 04:00:00, | NaN |
| 25-May-2017  | 05:00:00, | NaN |
| 25-May-2017  | 06:00:00, | NaN |
| 25-May-2017  | 07:00:00, | NaN |
| 25-May-2017  | 08:00:00, | NaN |
| 25-May-2017  | 09:00:00, | NaN |
| 25-May-2017  | 10:00:00, | NaN |
| 25-May-2017  | 11:00:00, | NaN |
| 25-May-2017  | 12:00:00, | NaN |
| 25-May-2017  | 13:00:00, | NaN |
| 25-May-2017  | 14:00:00, | NaN |
| 25-May-2017  | 15:00:00, | NaN |
| 25-May-2017  | 16:00:00, | NaN |
| 25-May-2017  | 17:00:00, | NaN |
| 25-May-2017  | 18:00:00, | NaN |

25-May-2017 19:00:00, NaN  
25-May-2017 20:00:00, NaN  
25-May-2017 21:00:00, NaN  
25-May-2017 22:00:00, NaN  
25-May-2017 23:00:00, NaN  
26-May-2017, NaN  
26-May-2017 01:00:00, NaN  
26-May-2017 02:00:00, NaN  
26-May-2017 03:00:00, NaN  
26-May-2017 04:00:00, NaN  
26-May-2017 05:00:00, NaN  
26-May-2017 06:00:00, NaN  
26-May-2017 07:00:00, NaN  
26-May-2017 08:00:00, NaN  
26-May-2017 09:00:00, NaN  
26-May-2017 10:00:00, NaN  
26-May-2017 11:00:00, NaN  
26-May-2017 12:00:00, NaN  
26-May-2017 13:00:00, NaN  
26-May-2017 14:00:00, NaN  
26-May-2017 15:00:00, NaN  
26-May-2017 16:00:00, NaN  
26-May-2017 17:00:00, NaN  
26-May-2017 18:00:00, NaN  
26-May-2017 19:00:00, NaN  
26-May-2017 20:00:00, NaN  
26-May-2017 21:00:00, NaN  
26-May-2017 22:00:00, NaN  
26-May-2017 23:00:00, NaN  
27-May-2017, NaN  
27-May-2017 01:00:00, NaN  
27-May-2017 02:00:00, NaN  
27-May-2017 03:00:00, NaN  
27-May-2017 04:00:00, NaN  
27-May-2017 05:00:00, NaN  
27-May-2017 06:00:00, NaN  
27-May-2017 07:00:00, NaN  
27-May-2017 08:00:00, NaN  
27-May-2017 09:00:00, NaN  
27-May-2017 10:00:00, NaN  
27-May-2017 11:00:00, NaN  
27-May-2017 12:00:00, NaN  
27-May-2017 13:00:00, NaN  
27-May-2017 14:00:00, NaN  
27-May-2017 15:00:00, NaN  
27-May-2017 16:00:00, NaN  
27-May-2017 17:00:00, NaN  
27-May-2017 18:00:00, NaN  
27-May-2017 19:00:00, NaN  
27-May-2017 20:00:00, NaN  
27-May-2017 21:00:00, NaN  
27-May-2017 22:00:00, NaN  
27-May-2017 23:00:00, NaN  
28-May-2017, NaN  
28-May-2017 01:00:00, NaN  
28-May-2017 02:00:00, NaN  
28-May-2017 03:00:00, NaN  
28-May-2017 04:00:00, NaN  
28-May-2017 05:00:00, NaN  
28-May-2017 06:00:00, NaN  
28-May-2017 07:00:00, NaN  
28-May-2017 08:00:00, NaN  
28-May-2017 09:00:00, NaN  
28-May-2017 10:00:00, NaN

28-May-2017 11:00:00, NaN  
28-May-2017 12:00:00, NaN  
28-May-2017 13:00:00, NaN  
28-May-2017 14:00:00, NaN  
28-May-2017 15:00:00, NaN  
28-May-2017 16:00:00, NaN  
28-May-2017 17:00:00, NaN  
28-May-2017 18:00:00, NaN  
28-May-2017 19:00:00, NaN  
28-May-2017 20:00:00, NaN  
28-May-2017 21:00:00, NaN  
28-May-2017 22:00:00, NaN  
28-May-2017 23:00:00, NaN  
29-May-2017, NaN  
29-May-2017 01:00:00, NaN  
29-May-2017 02:00:00, NaN  
29-May-2017 03:00:00, NaN  
29-May-2017 04:00:00, NaN  
29-May-2017 05:00:00, NaN  
29-May-2017 06:00:00, NaN  
29-May-2017 07:00:00, NaN  
29-May-2017 08:00:00, NaN  
29-May-2017 09:00:00, NaN  
29-May-2017 10:00:00, NaN  
29-May-2017 11:00:00, NaN  
29-May-2017 12:00:00, NaN  
29-May-2017 13:00:00, NaN  
29-May-2017 14:00:00, NaN  
29-May-2017 15:00:00, NaN  
29-May-2017 16:00:00, NaN  
29-May-2017 17:00:00, NaN  
29-May-2017 18:00:00, NaN  
29-May-2017 19:00:00, NaN  
29-May-2017 20:00:00, NaN  
29-May-2017 21:00:00, NaN  
29-May-2017 22:00:00, NaN  
29-May-2017 23:00:00, NaN  
30-May-2017, NaN  
30-May-2017 01:00:00, NaN  
30-May-2017 02:00:00, NaN  
30-May-2017 03:00:00, NaN  
30-May-2017 04:00:00, NaN  
30-May-2017 05:00:00, NaN  
30-May-2017 06:00:00, NaN  
30-May-2017 07:00:00, NaN  
30-May-2017 08:00:00, NaN  
30-May-2017 09:00:00, NaN  
30-May-2017 10:00:00, NaN  
30-May-2017 11:00:00, NaN  
30-May-2017 12:00:00, NaN  
30-May-2017 13:00:00, NaN  
30-May-2017 14:00:00, NaN  
30-May-2017 15:00:00, NaN  
30-May-2017 16:00:00, NaN  
30-May-2017 17:00:00, NaN  
30-May-2017 18:00:00, NaN  
30-May-2017 19:00:00, NaN  
30-May-2017 20:00:00, NaN  
30-May-2017 21:00:00, NaN  
30-May-2017 22:00:00, NaN  
30-May-2017 23:00:00, NaN  
31-May-2017, NaN  
31-May-2017 01:00:00, NaN  
31-May-2017 02:00:00, NaN

31-May-2017 03:00:00, NaN  
31-May-2017 04:00:00, NaN  
31-May-2017 05:00:00, NaN  
31-May-2017 06:00:00, NaN  
31-May-2017 07:00:00, NaN  
31-May-2017 08:00:00, NaN  
31-May-2017 09:00:00, NaN  
31-May-2017 10:00:00, NaN  
31-May-2017 11:00:00, NaN  
31-May-2017 12:00:00, NaN  
31-May-2017 13:00:00, NaN  
31-May-2017 14:00:00, NaN  
31-May-2017 15:00:00, NaN  
31-May-2017 16:00:00, NaN  
31-May-2017 17:00:00, NaN  
31-May-2017 18:00:00, NaN  
31-May-2017 19:00:00, NaN  
31-May-2017 20:00:00, NaN  
31-May-2017 21:00:00, NaN  
31-May-2017 22:00:00, NaN  
31-May-2017 23:00:00, NaN  
01-Jun-2017, 1.88e-01  
01-Jun-2017 01:00:00, 1.88e-01  
01-Jun-2017 02:00:00, 1.88e-01  
01-Jun-2017 03:00:00, 1.88e-01  
01-Jun-2017 04:00:00, 1.88e-01  
01-Jun-2017 05:00:00, 1.88e-01  
01-Jun-2017 06:00:00, 1.88e-01  
01-Jun-2017 07:00:00, 1.88e-01  
01-Jun-2017 08:00:00, 1.88e-01  
01-Jun-2017 09:00:00, 1.88e-01  
01-Jun-2017 10:00:00, 1.88e-01  
01-Jun-2017 11:00:00, 1.88e-01  
01-Jun-2017 12:00:00, 1.88e-01  
01-Jun-2017 13:00:00, 1.88e-01  
01-Jun-2017 14:00:00, 1.88e-01  
01-Jun-2017 15:00:00, 1.88e-01  
01-Jun-2017 16:00:00, 1.89e-01  
01-Jun-2017 17:00:00, 1.87e-01  
01-Jun-2017 18:00:00, 1.86e-01  
01-Jun-2017 19:00:00, 1.86e-01  
01-Jun-2017 20:00:00, 1.86e-01  
01-Jun-2017 21:00:00, 1.86e-01  
01-Jun-2017 22:00:00, 1.86e-01  
01-Jun-2017 23:00:00, 1.86e-01  
02-Jun-2017, 1.86e-01  
02-Jun-2017 01:00:00, 1.86e-01  
02-Jun-2017 02:00:00, 1.86e-01  
02-Jun-2017 03:00:00, 1.86e-01  
02-Jun-2017 04:00:00, 1.86e-01  
02-Jun-2017 05:00:00, 1.86e-01  
02-Jun-2017 06:00:00, 1.86e-01  
02-Jun-2017 07:00:00, 1.86e-01  
02-Jun-2017 08:00:00, 1.86e-01  
02-Jun-2017 09:00:00, 1.86e-01  
02-Jun-2017 10:00:00, 1.86e-01  
02-Jun-2017 11:00:00, 1.86e-01  
02-Jun-2017 12:00:00, 1.86e-01  
02-Jun-2017 13:00:00, 1.86e-01  
02-Jun-2017 14:00:00, 1.90e-01  
02-Jun-2017 15:00:00, 1.90e-01  
02-Jun-2017 16:00:00, 1.90e-01  
02-Jun-2017 17:00:00, 1.90e-01  
02-Jun-2017 18:00:00, 1.90e-01

02-Jun-2017 19:00:00, 1.90e-01  
02-Jun-2017 20:00:00, 1.90e-01  
02-Jun-2017 21:00:00, 1.91e-01  
02-Jun-2017 22:00:00, 1.91e-01  
02-Jun-2017 23:00:00, 1.91e-01  
03-Jun-2017, 1.91e-01  
03-Jun-2017 01:00:00, 1.92e-01  
03-Jun-2017 02:00:00, 1.92e-01  
03-Jun-2017 03:00:00, 1.92e-01  
03-Jun-2017 04:00:00, 1.92e-01  
03-Jun-2017 05:00:00, 1.92e-01  
03-Jun-2017 06:00:00, 1.92e-01  
03-Jun-2017 07:00:00, 1.92e-01  
03-Jun-2017 08:00:00, 1.91e-01  
03-Jun-2017 09:00:00, 1.90e-01  
03-Jun-2017 10:00:00, 1.90e-01  
03-Jun-2017 11:00:00, 1.90e-01  
03-Jun-2017 12:00:00, 1.90e-01  
03-Jun-2017 13:00:00, 1.90e-01  
03-Jun-2017 14:00:00, 1.90e-01  
03-Jun-2017 15:00:00, 1.90e-01  
03-Jun-2017 16:00:00, 1.90e-01  
03-Jun-2017 17:00:00, 1.90e-01  
03-Jun-2017 18:00:00, 1.90e-01  
03-Jun-2017 19:00:00, 1.90e-01  
03-Jun-2017 20:00:00, 1.90e-01  
03-Jun-2017 21:00:00, 1.90e-01  
03-Jun-2017 22:00:00, 1.91e-01  
03-Jun-2017 23:00:00, 1.91e-01  
04-Jun-2017, 1.91e-01  
04-Jun-2017 01:00:00, 1.92e-01  
04-Jun-2017 02:00:00, 1.91e-01  
04-Jun-2017 03:00:00, 1.91e-01  
04-Jun-2017 04:00:00, 1.91e-01  
04-Jun-2017 05:00:00, 1.91e-01  
04-Jun-2017 06:00:00, 1.91e-01  
04-Jun-2017 07:00:00, 1.91e-01  
04-Jun-2017 08:00:00, 1.91e-01  
04-Jun-2017 09:00:00, 1.90e-01  
04-Jun-2017 10:00:00, 1.90e-01  
04-Jun-2017 11:00:00, 1.90e-01  
04-Jun-2017 12:00:00, 1.90e-01  
04-Jun-2017 13:00:00, 1.90e-01  
04-Jun-2017 14:00:00, 1.90e-01  
04-Jun-2017 15:00:00, 1.89e-01  
04-Jun-2017 16:00:00, 1.89e-01  
04-Jun-2017 17:00:00, 1.90e-01  
04-Jun-2017 18:00:00, 1.90e-01  
04-Jun-2017 19:00:00, 1.90e-01  
04-Jun-2017 20:00:00, 1.90e-01  
04-Jun-2017 21:00:00, 1.90e-01  
04-Jun-2017 22:00:00, 1.90e-01  
04-Jun-2017 23:00:00, 1.90e-01  
05-Jun-2017, 1.91e-01  
05-Jun-2017 01:00:00, 1.91e-01  
05-Jun-2017 02:00:00, 1.91e-01  
05-Jun-2017 03:00:00, 1.91e-01  
05-Jun-2017 04:00:00, 1.91e-01  
05-Jun-2017 05:00:00, 1.91e-01  
05-Jun-2017 06:00:00, 1.91e-01  
05-Jun-2017 07:00:00, 1.91e-01  
05-Jun-2017 08:00:00, 1.90e-01  
05-Jun-2017 09:00:00, 1.90e-01  
05-Jun-2017 10:00:00, 1.90e-01

05-Jun-2017 11:00:00, 1.90e-01  
05-Jun-2017 12:00:00, 1.90e-01  
05-Jun-2017 13:00:00, 1.89e-01  
05-Jun-2017 14:00:00, 1.90e-01  
05-Jun-2017 15:00:00, 1.89e-01  
05-Jun-2017 16:00:00, 1.89e-01  
05-Jun-2017 17:00:00, 1.89e-01  
05-Jun-2017 18:00:00, 1.90e-01  
05-Jun-2017 19:00:00, 1.90e-01  
05-Jun-2017 20:00:00, 1.87e-01  
05-Jun-2017 21:00:00, 1.88e-01  
05-Jun-2017 22:00:00, 1.90e-01  
05-Jun-2017 23:00:00, 1.90e-01  
06-Jun-2017, 1.90e-01  
06-Jun-2017 01:00:00, 1.90e-01  
06-Jun-2017 02:00:00, 1.90e-01  
06-Jun-2017 03:00:00, 1.90e-01  
06-Jun-2017 04:00:00, 1.90e-01  
06-Jun-2017 05:00:00, 1.90e-01  
06-Jun-2017 06:00:00, 1.90e-01  
06-Jun-2017 07:00:00, 1.90e-01  
06-Jun-2017 08:00:00, 1.90e-01  
06-Jun-2017 09:00:00, 1.90e-01  
06-Jun-2017 10:00:00, 1.89e-01  
06-Jun-2017 11:00:00, 1.89e-01  
06-Jun-2017 12:00:00, 1.89e-01  
06-Jun-2017 13:00:00, 1.89e-01  
06-Jun-2017 14:00:00, 1.89e-01  
06-Jun-2017 15:00:00, 1.89e-01  
06-Jun-2017 16:00:00, 1.89e-01  
06-Jun-2017 17:00:00, 1.89e-01  
06-Jun-2017 18:00:00, 1.89e-01  
06-Jun-2017 19:00:00, 1.89e-01  
06-Jun-2017 20:00:00, 1.90e-01  
06-Jun-2017 21:00:00, 1.90e-01  
06-Jun-2017 22:00:00, 1.90e-01  
06-Jun-2017 23:00:00, 1.90e-01  
07-Jun-2017, 1.90e-01  
07-Jun-2017 01:00:00, 1.90e-01  
07-Jun-2017 02:00:00, 1.90e-01  
07-Jun-2017 03:00:00, 1.90e-01  
07-Jun-2017 04:00:00, 1.90e-01  
07-Jun-2017 05:00:00, 1.90e-01  
07-Jun-2017 06:00:00, 1.90e-01  
07-Jun-2017 07:00:00, 1.90e-01  
07-Jun-2017 08:00:00, 1.89e-01  
07-Jun-2017 09:00:00, 1.88e-01  
07-Jun-2017 10:00:00, 1.88e-01  
07-Jun-2017 11:00:00, 1.88e-01  
07-Jun-2017 12:00:00, 1.88e-01  
07-Jun-2017 13:00:00, 1.88e-01  
07-Jun-2017 14:00:00, 1.88e-01  
07-Jun-2017 15:00:00, 1.88e-01  
07-Jun-2017 16:00:00, 1.89e-01  
07-Jun-2017 17:00:00, 1.88e-01  
07-Jun-2017 18:00:00, 1.89e-01  
07-Jun-2017 19:00:00, 1.90e-01  
07-Jun-2017 20:00:00, 1.85e-01  
07-Jun-2017 21:00:00, 1.84e-01  
07-Jun-2017 22:00:00, 1.85e-01  
07-Jun-2017 23:00:00, 1.85e-01  
08-Jun-2017, 1.86e-01  
08-Jun-2017 01:00:00, 1.86e-01  
08-Jun-2017 02:00:00, 1.86e-01

08-Jun-2017 03:00:00, 1.86e-01  
08-Jun-2017 04:00:00, 1.87e-01  
08-Jun-2017 05:00:00, 1.87e-01  
08-Jun-2017 06:00:00, 1.87e-01  
08-Jun-2017 07:00:00, 1.87e-01  
08-Jun-2017 08:00:00, 1.87e-01  
08-Jun-2017 09:00:00, 1.88e-01  
08-Jun-2017 10:00:00, 1.88e-01  
08-Jun-2017 11:00:00, 1.88e-01  
08-Jun-2017 12:00:00, 1.88e-01  
08-Jun-2017 13:00:00, 1.88e-01  
08-Jun-2017 14:00:00, 1.88e-01  
08-Jun-2017 15:00:00, 1.88e-01  
08-Jun-2017 16:00:00, 1.88e-01  
08-Jun-2017 17:00:00, 1.88e-01  
08-Jun-2017 18:00:00, 1.88e-01  
08-Jun-2017 19:00:00, 1.88e-01  
08-Jun-2017 20:00:00, 1.88e-01  
08-Jun-2017 21:00:00, 1.88e-01  
08-Jun-2017 22:00:00, 1.89e-01  
08-Jun-2017 23:00:00, 1.89e-01  
09-Jun-2017, 1.89e-01  
09-Jun-2017 01:00:00, 1.89e-01  
09-Jun-2017 02:00:00, 1.89e-01  
09-Jun-2017 03:00:00, 1.90e-01  
09-Jun-2017 04:00:00, 1.89e-01  
09-Jun-2017 05:00:00, 1.90e-01  
09-Jun-2017 06:00:00, 1.90e-01  
09-Jun-2017 07:00:00, 1.90e-01  
09-Jun-2017 08:00:00, 1.89e-01  
09-Jun-2017 09:00:00, 1.88e-01  
09-Jun-2017 10:00:00, 1.88e-01  
09-Jun-2017 11:00:00, 1.88e-01  
09-Jun-2017 12:00:00, 1.88e-01  
09-Jun-2017 13:00:00, 1.88e-01  
09-Jun-2017 14:00:00, 1.88e-01  
09-Jun-2017 15:00:00, 1.88e-01  
09-Jun-2017 16:00:00, 1.88e-01  
09-Jun-2017 17:00:00, 1.88e-01  
09-Jun-2017 18:00:00, 1.88e-01  
09-Jun-2017 19:00:00, 1.88e-01  
09-Jun-2017 20:00:00, 1.88e-01  
09-Jun-2017 21:00:00, 1.88e-01  
09-Jun-2017 22:00:00, 1.88e-01  
09-Jun-2017 23:00:00, 1.88e-01  
10-Jun-2017, 1.88e-01  
10-Jun-2017 01:00:00, 1.88e-01  
10-Jun-2017 02:00:00, 1.88e-01  
10-Jun-2017 03:00:00, 1.88e-01  
10-Jun-2017 04:00:00, 1.88e-01  
10-Jun-2017 05:00:00, 1.88e-01  
10-Jun-2017 06:00:00, 1.88e-01  
10-Jun-2017 07:00:00, 1.88e-01  
10-Jun-2017 08:00:00, 1.88e-01  
10-Jun-2017 09:00:00, 1.88e-01  
10-Jun-2017 10:00:00, 1.88e-01  
10-Jun-2017 11:00:00, 1.88e-01  
10-Jun-2017 12:00:00, 1.88e-01  
10-Jun-2017 13:00:00, 1.88e-01  
10-Jun-2017 14:00:00, 1.88e-01  
10-Jun-2017 15:00:00, 1.88e-01  
10-Jun-2017 16:00:00, 1.88e-01  
10-Jun-2017 17:00:00, 1.88e-01  
10-Jun-2017 18:00:00, 1.88e-01

10-Jun-2017 19:00:00, 1.88e-01  
10-Jun-2017 20:00:00, 1.88e-01  
10-Jun-2017 21:00:00, 1.88e-01  
10-Jun-2017 22:00:00, 1.88e-01  
10-Jun-2017 23:00:00, 1.88e-01  
11-Jun-2017, 1.88e-01  
11-Jun-2017 01:00:00, 1.88e-01  
11-Jun-2017 02:00:00, 1.88e-01  
11-Jun-2017 03:00:00, 1.88e-01  
11-Jun-2017 04:00:00, 1.88e-01  
11-Jun-2017 05:00:00, 1.88e-01  
11-Jun-2017 06:00:00, 1.88e-01  
11-Jun-2017 07:00:00, 1.88e-01  
11-Jun-2017 08:00:00, 1.88e-01  
11-Jun-2017 09:00:00, 1.88e-01  
11-Jun-2017 10:00:00, 1.88e-01  
11-Jun-2017 11:00:00, 1.88e-01  
11-Jun-2017 12:00:00, 1.88e-01  
11-Jun-2017 13:00:00, 1.88e-01  
11-Jun-2017 14:00:00, 1.88e-01  
11-Jun-2017 15:00:00, 1.87e-01  
11-Jun-2017 16:00:00, 1.87e-01  
11-Jun-2017 17:00:00, 1.87e-01  
11-Jun-2017 18:00:00, 1.87e-01  
11-Jun-2017 19:00:00, 1.88e-01  
11-Jun-2017 20:00:00, 1.88e-01  
11-Jun-2017 21:00:00, 1.88e-01  
11-Jun-2017 22:00:00, 1.88e-01  
11-Jun-2017 23:00:00, 1.88e-01  
12-Jun-2017, 1.88e-01  
12-Jun-2017 01:00:00, 1.88e-01  
12-Jun-2017 02:00:00, 1.88e-01  
12-Jun-2017 03:00:00, 1.88e-01  
12-Jun-2017 04:00:00, 1.88e-01  
12-Jun-2017 05:00:00, 1.88e-01  
12-Jun-2017 06:00:00, 1.88e-01  
12-Jun-2017 07:00:00, 1.88e-01  
12-Jun-2017 08:00:00, 1.88e-01  
12-Jun-2017 09:00:00, 1.88e-01  
12-Jun-2017 10:00:00, 1.88e-01  
12-Jun-2017 11:00:00, 1.86e-01  
12-Jun-2017 12:00:00, 1.86e-01  
12-Jun-2017 13:00:00, 1.86e-01  
12-Jun-2017 14:00:00, 1.85e-01  
12-Jun-2017 15:00:00, 1.85e-01  
12-Jun-2017 16:00:00, 1.88e-01  
12-Jun-2017 17:00:00, 1.88e-01  
12-Jun-2017 18:00:00, 1.88e-01  
12-Jun-2017 19:00:00, 1.88e-01  
12-Jun-2017 20:00:00, 1.88e-01  
12-Jun-2017 21:00:00, 1.89e-01  
12-Jun-2017 22:00:00, 1.89e-01  
12-Jun-2017 23:00:00, 1.89e-01  
13-Jun-2017, 1.89e-01  
13-Jun-2017 01:00:00, 1.89e-01  
13-Jun-2017 02:00:00, 1.89e-01  
13-Jun-2017 03:00:00, 1.89e-01  
13-Jun-2017 04:00:00, 1.90e-01  
13-Jun-2017 05:00:00, 1.90e-01  
13-Jun-2017 06:00:00, 1.90e-01  
13-Jun-2017 07:00:00, 1.90e-01  
13-Jun-2017 08:00:00, 1.89e-01  
13-Jun-2017 09:00:00, 1.89e-01  
13-Jun-2017 10:00:00, 1.89e-01



13-Jun-2017 11:00:00, 1.88e-01  
13-Jun-2017 12:00:00, 1.88e-01  
13-Jun-2017 13:00:00, 1.88e-01  
13-Jun-2017 14:00:00, 1.88e-01  
13-Jun-2017 15:00:00, 1.88e-01  
13-Jun-2017 16:00:00, 1.88e-01  
13-Jun-2017 17:00:00, 1.88e-01  
13-Jun-2017 18:00:00, 1.88e-01  
13-Jun-2017 19:00:00, 1.88e-01  
13-Jun-2017 20:00:00, 1.88e-01  
13-Jun-2017 21:00:00, 1.88e-01  
13-Jun-2017 22:00:00, 1.88e-01  
13-Jun-2017 23:00:00, 1.88e-01  
14-Jun-2017, 1.88e-01  
14-Jun-2017 01:00:00, 1.88e-01  
14-Jun-2017 02:00:00, 1.88e-01  
14-Jun-2017 03:00:00, 1.88e-01  
14-Jun-2017 04:00:00, 1.88e-01  
14-Jun-2017 05:00:00, 1.88e-01  
14-Jun-2017 06:00:00, 1.88e-01  
14-Jun-2017 07:00:00, 1.88e-01  
14-Jun-2017 08:00:00, 1.88e-01  
14-Jun-2017 09:00:00, 1.88e-01  
14-Jun-2017 10:00:00, 1.88e-01  
14-Jun-2017 11:00:00, 1.87e-01  
14-Jun-2017 12:00:00, 1.87e-01  
14-Jun-2017 13:00:00, 1.86e-01  
14-Jun-2017 14:00:00, 1.86e-01  
14-Jun-2017 15:00:00, 1.86e-01  
14-Jun-2017 16:00:00, 1.86e-01  
14-Jun-2017 17:00:00, 1.86e-01  
14-Jun-2017 18:00:00, 1.86e-01  
14-Jun-2017 19:00:00, 1.86e-01  
14-Jun-2017 20:00:00, 1.86e-01  
14-Jun-2017 21:00:00, 1.86e-01  
14-Jun-2017 22:00:00, 1.86e-01  
14-Jun-2017 23:00:00, 1.86e-01  
15-Jun-2017, 1.86e-01  
15-Jun-2017 01:00:00, 1.86e-01  
15-Jun-2017 02:00:00, 1.86e-01  
15-Jun-2017 03:00:00, 1.86e-01  
15-Jun-2017 04:00:00, 1.86e-01  
15-Jun-2017 05:00:00, 1.86e-01  
15-Jun-2017 06:00:00, 1.86e-01  
15-Jun-2017 07:00:00, 1.86e-01  
15-Jun-2017 08:00:00, 1.86e-01  
15-Jun-2017 09:00:00, 1.86e-01  
15-Jun-2017 10:00:00, 1.86e-01  
15-Jun-2017 11:00:00, 1.86e-01  
15-Jun-2017 12:00:00, 1.85e-01  
15-Jun-2017 13:00:00, 1.85e-01  
15-Jun-2017 14:00:00, 1.85e-01  
15-Jun-2017 15:00:00, 1.84e-01  
15-Jun-2017 16:00:00, 1.84e-01  
15-Jun-2017 17:00:00, 1.84e-01  
15-Jun-2017 18:00:00, 1.84e-01  
15-Jun-2017 19:00:00, 1.84e-01  
15-Jun-2017 20:00:00, 1.85e-01  
15-Jun-2017 21:00:00, 1.85e-01  
15-Jun-2017 22:00:00, 1.85e-01  
15-Jun-2017 23:00:00, 1.86e-01  
16-Jun-2017, 1.86e-01  
16-Jun-2017 01:00:00, 1.86e-01  
16-Jun-2017 02:00:00, 1.86e-01

16-Jun-2017 03:00:00, 1.86e-01  
16-Jun-2017 04:00:00, 1.86e-01  
16-Jun-2017 05:00:00, 1.86e-01  
16-Jun-2017 06:00:00, 1.86e-01  
16-Jun-2017 07:00:00, 1.86e-01  
16-Jun-2017 08:00:00, 1.85e-01  
16-Jun-2017 09:00:00, 1.84e-01  
16-Jun-2017 10:00:00, 1.84e-01  
16-Jun-2017 11:00:00, 1.84e-01  
16-Jun-2017 12:00:00, 1.84e-01  
16-Jun-2017 13:00:00, 1.84e-01  
16-Jun-2017 14:00:00, 1.84e-01  
16-Jun-2017 15:00:00, 1.84e-01  
16-Jun-2017 16:00:00, 1.84e-01  
16-Jun-2017 17:00:00, 1.84e-01  
16-Jun-2017 18:00:00, 1.84e-01  
16-Jun-2017 19:00:00, 1.84e-01  
16-Jun-2017 20:00:00, 1.84e-01  
16-Jun-2017 21:00:00, 1.84e-01  
16-Jun-2017 22:00:00, 1.84e-01  
16-Jun-2017 23:00:00, 1.84e-01  
17-Jun-2017, 1.84e-01  
17-Jun-2017 01:00:00, 1.84e-01  
17-Jun-2017 02:00:00, 1.84e-01  
17-Jun-2017 03:00:00, 1.84e-01  
17-Jun-2017 04:00:00, 1.84e-01  
17-Jun-2017 05:00:00, 1.84e-01  
17-Jun-2017 06:00:00, 1.84e-01  
17-Jun-2017 07:00:00, 1.84e-01  
17-Jun-2017 08:00:00, 1.84e-01  
17-Jun-2017 09:00:00, 1.84e-01  
17-Jun-2017 10:00:00, 1.84e-01  
17-Jun-2017 11:00:00, 1.84e-01  
17-Jun-2017 12:00:00, 1.84e-01  
17-Jun-2017 13:00:00, 1.83e-01  
17-Jun-2017 14:00:00, 1.82e-01  
17-Jun-2017 15:00:00, 1.81e-01  
17-Jun-2017 16:00:00, 1.80e-01  
17-Jun-2017 17:00:00, 1.80e-01  
17-Jun-2017 18:00:00, 1.80e-01  
17-Jun-2017 19:00:00, 1.81e-01  
17-Jun-2017 20:00:00, 1.81e-01  
17-Jun-2017 21:00:00, 1.82e-01  
17-Jun-2017 22:00:00, 1.82e-01  
17-Jun-2017 23:00:00, 1.82e-01  
18-Jun-2017, 1.82e-01  
18-Jun-2017 01:00:00, 1.82e-01  
18-Jun-2017 02:00:00, 1.82e-01  
18-Jun-2017 03:00:00, 1.82e-01  
18-Jun-2017 04:00:00, 1.82e-01  
18-Jun-2017 05:00:00, 1.82e-01  
18-Jun-2017 06:00:00, 1.82e-01  
18-Jun-2017 07:00:00, 1.82e-01  
18-Jun-2017 08:00:00, 1.82e-01  
18-Jun-2017 09:00:00, 1.81e-01  
18-Jun-2017 10:00:00, 1.80e-01  
18-Jun-2017 11:00:00, 1.80e-01  
18-Jun-2017 12:00:00, 1.80e-01  
18-Jun-2017 13:00:00, 1.80e-01  
18-Jun-2017 14:00:00, 1.80e-01  
18-Jun-2017 15:00:00, 1.79e-01  
18-Jun-2017 16:00:00, 1.79e-01  
18-Jun-2017 17:00:00, 1.79e-01  
18-Jun-2017 18:00:00, 1.80e-01

18-Jun-2017 19:00:00, 1.80e-01  
18-Jun-2017 20:00:00, 1.80e-01  
18-Jun-2017 21:00:00, 1.80e-01  
18-Jun-2017 22:00:00, 1.80e-01  
18-Jun-2017 23:00:00, 1.80e-01  
19-Jun-2017, 1.81e-01  
19-Jun-2017 01:00:00, 1.81e-01  
19-Jun-2017 02:00:00, 1.81e-01  
19-Jun-2017 03:00:00, 1.81e-01  
19-Jun-2017 04:00:00, 1.81e-01  
19-Jun-2017 05:00:00, 1.81e-01  
19-Jun-2017 06:00:00, 1.81e-01  
19-Jun-2017 07:00:00, 1.81e-01  
19-Jun-2017 08:00:00, 1.80e-01  
19-Jun-2017 09:00:00, 1.80e-01  
19-Jun-2017 10:00:00, 1.80e-01  
19-Jun-2017 11:00:00, 1.79e-01  
19-Jun-2017 12:00:00, 1.79e-01  
19-Jun-2017 13:00:00, 1.79e-01  
19-Jun-2017 14:00:00, 1.79e-01  
19-Jun-2017 15:00:00, 1.78e-01  
19-Jun-2017 16:00:00, 1.78e-01  
19-Jun-2017 17:00:00, 1.79e-01  
19-Jun-2017 18:00:00, 1.79e-01  
19-Jun-2017 19:00:00, 1.79e-01  
19-Jun-2017 20:00:00, 1.79e-01  
19-Jun-2017 21:00:00, 1.80e-01  
19-Jun-2017 22:00:00, 1.80e-01  
19-Jun-2017 23:00:00, 1.80e-01  
20-Jun-2017, 1.80e-01  
20-Jun-2017 01:00:00, 1.80e-01  
20-Jun-2017 02:00:00, 1.80e-01  
20-Jun-2017 03:00:00, 1.80e-01  
20-Jun-2017 04:00:00, 1.80e-01  
20-Jun-2017 05:00:00, 1.80e-01  
20-Jun-2017 06:00:00, 1.80e-01  
20-Jun-2017 07:00:00, 1.80e-01  
20-Jun-2017 08:00:00, 1.80e-01  
20-Jun-2017 09:00:00, 1.79e-01  
20-Jun-2017 10:00:00, 1.79e-01  
20-Jun-2017 11:00:00, 1.79e-01  
20-Jun-2017 12:00:00, 1.78e-01  
20-Jun-2017 13:00:00, 1.77e-01  
20-Jun-2017 14:00:00, 1.77e-01  
20-Jun-2017 15:00:00, 1.77e-01  
20-Jun-2017 16:00:00, 1.77e-01  
20-Jun-2017 17:00:00, 1.77e-01  
20-Jun-2017 18:00:00, 1.77e-01  
20-Jun-2017 19:00:00, 1.78e-01  
20-Jun-2017 20:00:00, 1.78e-01  
20-Jun-2017 21:00:00, 1.78e-01  
20-Jun-2017 22:00:00, 1.78e-01  
20-Jun-2017 23:00:00, 1.79e-01  
21-Jun-2017, 1.79e-01  
21-Jun-2017 01:00:00, 1.79e-01  
21-Jun-2017 02:00:00, 1.79e-01  
21-Jun-2017 03:00:00, 1.79e-01  
21-Jun-2017 04:00:00, 1.79e-01  
21-Jun-2017 05:00:00, 1.79e-01  
21-Jun-2017 06:00:00, 1.79e-01  
21-Jun-2017 07:00:00, 1.79e-01  
21-Jun-2017 08:00:00, 1.78e-01  
21-Jun-2017 09:00:00, 1.77e-01  
21-Jun-2017 10:00:00, 1.77e-01

21-Jun-2017 11:00:00, 1.77e-01  
21-Jun-2017 12:00:00, 1.77e-01  
21-Jun-2017 13:00:00, 1.77e-01  
21-Jun-2017 14:00:00, 1.77e-01  
21-Jun-2017 15:00:00, 1.77e-01  
21-Jun-2017 16:00:00, 1.77e-01  
21-Jun-2017 17:00:00, 1.76e-01  
21-Jun-2017 18:00:00, 1.77e-01  
21-Jun-2017 19:00:00, 1.77e-01  
21-Jun-2017 20:00:00, 1.77e-01  
21-Jun-2017 21:00:00, 1.78e-01  
21-Jun-2017 22:00:00, 1.78e-01  
21-Jun-2017 23:00:00, 1.78e-01  
22-Jun-2017, 1.78e-01  
22-Jun-2017 01:00:00, 1.78e-01  
22-Jun-2017 02:00:00, 1.78e-01  
22-Jun-2017 03:00:00, 1.78e-01  
22-Jun-2017 04:00:00, 1.78e-01  
22-Jun-2017 05:00:00, 1.79e-01  
22-Jun-2017 06:00:00, 1.78e-01  
22-Jun-2017 07:00:00, 1.78e-01  
22-Jun-2017 08:00:00, 1.78e-01  
22-Jun-2017 09:00:00, 1.77e-01  
22-Jun-2017 10:00:00, 1.77e-01  
22-Jun-2017 11:00:00, 1.77e-01  
22-Jun-2017 12:00:00, 1.77e-01  
22-Jun-2017 13:00:00, 1.76e-01  
22-Jun-2017 14:00:00, 1.76e-01  
22-Jun-2017 15:00:00, 1.76e-01  
22-Jun-2017 16:00:00, 1.76e-01  
22-Jun-2017 17:00:00, 1.76e-01  
22-Jun-2017 18:00:00, 1.76e-01  
22-Jun-2017 19:00:00, 1.77e-01  
22-Jun-2017 20:00:00, 1.77e-01  
22-Jun-2017 21:00:00, 1.77e-01  
22-Jun-2017 22:00:00, 1.77e-01  
22-Jun-2017 23:00:00, 1.77e-01  
23-Jun-2017, 1.77e-01  
23-Jun-2017 01:00:00, 1.77e-01  
23-Jun-2017 02:00:00, 1.77e-01  
23-Jun-2017 03:00:00, 1.77e-01  
23-Jun-2017 04:00:00, 1.77e-01  
23-Jun-2017 05:00:00, 1.77e-01  
23-Jun-2017 06:00:00, 1.77e-01  
23-Jun-2017 07:00:00, 1.77e-01  
23-Jun-2017 08:00:00, 1.77e-01  
23-Jun-2017 09:00:00, 1.77e-01  
23-Jun-2017 10:00:00, 1.76e-01  
23-Jun-2017 11:00:00, 1.76e-01  
23-Jun-2017 12:00:00, 1.75e-01  
23-Jun-2017 13:00:00, 1.75e-01  
23-Jun-2017 14:00:00, 1.75e-01  
23-Jun-2017 15:00:00, 1.75e-01  
23-Jun-2017 16:00:00, 1.75e-01  
23-Jun-2017 17:00:00, 1.75e-01  
23-Jun-2017 18:00:00, 1.75e-01  
23-Jun-2017 19:00:00, 1.75e-01  
23-Jun-2017 20:00:00, 1.75e-01  
23-Jun-2017 21:00:00, 1.76e-01  
23-Jun-2017 22:00:00, 1.76e-01  
23-Jun-2017 23:00:00, 1.76e-01  
24-Jun-2017, 1.76e-01  
24-Jun-2017 01:00:00, 1.76e-01  
24-Jun-2017 02:00:00, 1.76e-01

24-Jun-2017 03:00:00, 1.76e-01  
24-Jun-2017 04:00:00, 1.76e-01  
24-Jun-2017 05:00:00, 1.76e-01  
24-Jun-2017 06:00:00, 1.76e-01  
24-Jun-2017 07:00:00, 1.76e-01  
24-Jun-2017 08:00:00, 1.76e-01  
24-Jun-2017 09:00:00, 1.75e-01  
24-Jun-2017 10:00:00, 1.75e-01  
24-Jun-2017 11:00:00, 1.75e-01  
24-Jun-2017 12:00:00, 1.74e-01  
24-Jun-2017 13:00:00, 1.74e-01  
24-Jun-2017 14:00:00, 1.74e-01  
24-Jun-2017 15:00:00, 1.73e-01  
24-Jun-2017 16:00:00, 1.74e-01  
24-Jun-2017 17:00:00, 1.74e-01  
24-Jun-2017 18:00:00, 1.74e-01  
24-Jun-2017 19:00:00, 1.74e-01  
24-Jun-2017 20:00:00, 1.74e-01  
24-Jun-2017 21:00:00, 1.74e-01  
24-Jun-2017 22:00:00, 1.74e-01  
24-Jun-2017 23:00:00, 1.75e-01  
25-Jun-2017, 1.75e-01  
25-Jun-2017 01:00:00, 1.75e-01  
25-Jun-2017 02:00:00, 1.75e-01  
25-Jun-2017 03:00:00, 1.75e-01  
25-Jun-2017 04:00:00, 1.75e-01  
25-Jun-2017 05:00:00, 1.75e-01  
25-Jun-2017 06:00:00, 1.75e-01  
25-Jun-2017 07:00:00, 1.75e-01  
25-Jun-2017 08:00:00, 1.74e-01  
25-Jun-2017 09:00:00, 1.73e-01  
25-Jun-2017 10:00:00, 1.73e-01  
25-Jun-2017 11:00:00, 1.73e-01  
25-Jun-2017 12:00:00, 1.73e-01  
25-Jun-2017 13:00:00, 1.72e-01  
25-Jun-2017 14:00:00, 1.72e-01  
25-Jun-2017 15:00:00, 1.72e-01  
25-Jun-2017 16:00:00, 1.71e-01  
25-Jun-2017 17:00:00, 1.71e-01  
25-Jun-2017 18:00:00, 1.72e-01  
25-Jun-2017 19:00:00, 1.72e-01  
25-Jun-2017 20:00:00, 1.72e-01  
25-Jun-2017 21:00:00, 1.73e-01  
25-Jun-2017 22:00:00, 1.73e-01  
25-Jun-2017 23:00:00, 1.75e-01  
26-Jun-2017, 1.77e-01  
26-Jun-2017 01:00:00, 1.74e-01  
26-Jun-2017 02:00:00, 1.73e-01  
26-Jun-2017 03:00:00, 1.73e-01  
26-Jun-2017 04:00:00, 1.73e-01  
26-Jun-2017 05:00:00, 1.73e-01  
26-Jun-2017 06:00:00, 1.73e-01  
26-Jun-2017 07:00:00, 1.73e-01  
26-Jun-2017 08:00:00, 1.73e-01  
26-Jun-2017 09:00:00, 1.72e-01  
26-Jun-2017 10:00:00, 1.71e-01  
26-Jun-2017 11:00:00, 1.71e-01  
26-Jun-2017 12:00:00, 1.71e-01  
26-Jun-2017 13:00:00, 1.71e-01  
26-Jun-2017 14:00:00, 1.70e-01  
26-Jun-2017 15:00:00, 1.70e-01  
26-Jun-2017 16:00:00, 1.70e-01  
26-Jun-2017 17:00:00, 1.70e-01  
26-Jun-2017 18:00:00, 1.71e-01

26-Jun-2017 19:00:00, 1.71e-01  
26-Jun-2017 20:00:00, 1.71e-01  
26-Jun-2017 21:00:00, 1.71e-01  
26-Jun-2017 22:00:00, 1.71e-01  
26-Jun-2017 23:00:00, 1.71e-01  
27-Jun-2017, 1.71e-01  
27-Jun-2017 01:00:00, 1.71e-01  
27-Jun-2017 02:00:00, 1.71e-01  
27-Jun-2017 03:00:00, 1.71e-01  
27-Jun-2017 04:00:00, 1.71e-01  
27-Jun-2017 05:00:00, 1.71e-01  
27-Jun-2017 06:00:00, 1.71e-01  
27-Jun-2017 07:00:00, 1.71e-01  
27-Jun-2017 08:00:00, 1.71e-01  
27-Jun-2017 09:00:00, 1.71e-01  
27-Jun-2017 10:00:00, 1.70e-01  
27-Jun-2017 11:00:00, 1.70e-01  
27-Jun-2017 12:00:00, 1.69e-01  
27-Jun-2017 13:00:00, 1.69e-01  
27-Jun-2017 14:00:00, 1.69e-01  
27-Jun-2017 15:00:00, 1.69e-01  
27-Jun-2017 16:00:00, 1.69e-01  
27-Jun-2017 17:00:00, 1.69e-01  
27-Jun-2017 18:00:00, 1.69e-01  
27-Jun-2017 19:00:00, 1.69e-01  
27-Jun-2017 20:00:00, 1.69e-01  
27-Jun-2017 21:00:00, 1.69e-01  
27-Jun-2017 22:00:00, 1.69e-01  
27-Jun-2017 23:00:00, 1.69e-01  
28-Jun-2017, 1.69e-01  
28-Jun-2017 01:00:00, 1.69e-01  
28-Jun-2017 02:00:00, 1.69e-01  
28-Jun-2017 03:00:00, 1.69e-01  
28-Jun-2017 04:00:00, 1.70e-01  
28-Jun-2017 05:00:00, 1.70e-01  
28-Jun-2017 06:00:00, 1.70e-01  
28-Jun-2017 07:00:00, 1.70e-01  
28-Jun-2017 08:00:00, 1.69e-01  
28-Jun-2017 09:00:00, 1.69e-01  
28-Jun-2017 10:00:00, 1.69e-01  
28-Jun-2017 11:00:00, 1.68e-01  
28-Jun-2017 12:00:00, 1.68e-01  
28-Jun-2017 13:00:00, 1.67e-01  
28-Jun-2017 14:00:00, 1.67e-01  
28-Jun-2017 15:00:00, 1.67e-01  
28-Jun-2017 16:00:00, 1.66e-01  
28-Jun-2017 17:00:00, 1.66e-01  
28-Jun-2017 18:00:00, 1.66e-01  
28-Jun-2017 19:00:00, 1.66e-01  
28-Jun-2017 20:00:00, 1.66e-01  
28-Jun-2017 21:00:00, 1.67e-01  
28-Jun-2017 22:00:00, 1.67e-01  
28-Jun-2017 23:00:00, 1.67e-01  
29-Jun-2017, 1.67e-01  
29-Jun-2017 01:00:00, 1.67e-01  
29-Jun-2017 02:00:00, 1.67e-01  
29-Jun-2017 03:00:00, 1.67e-01  
29-Jun-2017 04:00:00, 1.67e-01  
29-Jun-2017 05:00:00, 1.67e-01  
29-Jun-2017 06:00:00, 1.67e-01  
29-Jun-2017 07:00:00, 1.67e-01  
29-Jun-2017 08:00:00, 1.67e-01  
29-Jun-2017 09:00:00, 1.66e-01  
29-Jun-2017 10:00:00, 1.66e-01

29-Jun-2017 11:00:00, 1.65e-01  
29-Jun-2017 12:00:00, 1.65e-01  
29-Jun-2017 13:00:00, 1.65e-01  
29-Jun-2017 14:00:00, 1.65e-01  
29-Jun-2017 15:00:00, 1.64e-01  
29-Jun-2017 16:00:00, 1.65e-01  
29-Jun-2017 17:00:00, 1.64e-01  
29-Jun-2017 18:00:00, 1.64e-01  
29-Jun-2017 19:00:00, 1.64e-01  
29-Jun-2017 20:00:00, 1.64e-01  
29-Jun-2017 21:00:00, 1.64e-01  
29-Jun-2017 22:00:00, 1.65e-01  
29-Jun-2017 23:00:00, 1.65e-01  
30-Jun-2017, 1.65e-01  
30-Jun-2017 01:00:00, 1.65e-01  
30-Jun-2017 02:00:00, 1.65e-01  
30-Jun-2017 03:00:00, 1.65e-01  
30-Jun-2017 04:00:00, 1.65e-01  
30-Jun-2017 05:00:00, 1.65e-01  
30-Jun-2017 06:00:00, 1.65e-01  
30-Jun-2017 07:00:00, 1.65e-01  
30-Jun-2017 08:00:00, 1.65e-01  
30-Jun-2017 09:00:00, 1.65e-01  
30-Jun-2017 10:00:00, 1.65e-01  
30-Jun-2017 11:00:00, 1.64e-01  
30-Jun-2017 12:00:00, 1.64e-01  
30-Jun-2017 13:00:00, 1.65e-01  
30-Jun-2017 14:00:00, 1.65e-01  
30-Jun-2017 15:00:00, 1.64e-01  
30-Jun-2017 16:00:00, 1.63e-01  
30-Jun-2017 17:00:00, 1.63e-01  
30-Jun-2017 18:00:00, 1.63e-01  
30-Jun-2017 19:00:00, 1.63e-01  
30-Jun-2017 20:00:00, 1.63e-01  
30-Jun-2017 21:00:00, 1.63e-01  
30-Jun-2017 22:00:00, 1.64e-01  
30-Jun-2017 23:00:00, 1.64e-01  
01-Jul-2017, 1.64e-01  
01-Jul-2017 01:00:00, 1.65e-01  
01-Jul-2017 02:00:00, 1.65e-01  
01-Jul-2017 03:00:00, 1.65e-01  
01-Jul-2017 04:00:00, 1.65e-01  
01-Jul-2017 05:00:00, 1.65e-01  
01-Jul-2017 06:00:00, 1.65e-01  
01-Jul-2017 07:00:00, 1.65e-01  
01-Jul-2017 08:00:00, 1.65e-01  
01-Jul-2017 09:00:00, 1.64e-01  
01-Jul-2017 10:00:00, 1.63e-01  
01-Jul-2017 11:00:00, 1.63e-01  
01-Jul-2017 12:00:00, 1.63e-01  
01-Jul-2017 13:00:00, 1.63e-01  
01-Jul-2017 14:00:00, 1.62e-01  
01-Jul-2017 15:00:00, 1.61e-01  
01-Jul-2017 16:00:00, 1.61e-01  
01-Jul-2017 17:00:00, 1.61e-01  
01-Jul-2017 18:00:00, 1.61e-01  
01-Jul-2017 19:00:00, 1.61e-01  
01-Jul-2017 20:00:00, 1.61e-01  
01-Jul-2017 21:00:00, 1.61e-01  
01-Jul-2017 22:00:00, 1.61e-01  
01-Jul-2017 23:00:00, 1.61e-01  
02-Jul-2017, 1.61e-01  
02-Jul-2017 01:00:00, 1.61e-01  
02-Jul-2017 02:00:00, 1.62e-01

02-Jul-2017 03:00:00, 1.62e-01  
02-Jul-2017 04:00:00, 1.62e-01  
02-Jul-2017 05:00:00, 1.62e-01  
02-Jul-2017 06:00:00, 1.62e-01  
02-Jul-2017 07:00:00, 1.63e-01  
02-Jul-2017 08:00:00, 1.63e-01  
02-Jul-2017 09:00:00, 1.62e-01  
02-Jul-2017 10:00:00, 1.61e-01  
02-Jul-2017 11:00:00, 1.61e-01  
02-Jul-2017 12:00:00, 1.61e-01  
02-Jul-2017 13:00:00, 1.60e-01  
02-Jul-2017 14:00:00, 1.61e-01  
02-Jul-2017 15:00:00, 1.61e-01  
02-Jul-2017 16:00:00, 1.61e-01  
02-Jul-2017 17:00:00, 1.60e-01  
02-Jul-2017 18:00:00, 1.59e-01  
02-Jul-2017 19:00:00, 1.60e-01  
02-Jul-2017 20:00:00, 1.61e-01  
02-Jul-2017 21:00:00, 1.61e-01  
02-Jul-2017 22:00:00, 1.61e-01  
02-Jul-2017 23:00:00, 1.61e-01  
03-Jul-2017, 1.61e-01  
03-Jul-2017 01:00:00, 1.61e-01  
03-Jul-2017 02:00:00, 1.61e-01  
03-Jul-2017 03:00:00, 1.61e-01  
03-Jul-2017 04:00:00, 1.61e-01  
03-Jul-2017 05:00:00, 1.61e-01  
03-Jul-2017 06:00:00, 1.61e-01  
03-Jul-2017 07:00:00, 1.61e-01  
03-Jul-2017 08:00:00, 1.61e-01  
03-Jul-2017 09:00:00, 1.61e-01  
03-Jul-2017 10:00:00, 1.61e-01  
03-Jul-2017 11:00:00, 1.61e-01  
03-Jul-2017 12:00:00, 1.60e-01  
03-Jul-2017 13:00:00, 1.59e-01  
03-Jul-2017 14:00:00, 1.59e-01  
03-Jul-2017 15:00:00, 1.58e-01  
03-Jul-2017 16:00:00, 1.59e-01  
03-Jul-2017 17:00:00, 1.59e-01  
03-Jul-2017 18:00:00, 1.58e-01  
03-Jul-2017 19:00:00, 1.58e-01  
03-Jul-2017 20:00:00, 1.57e-01  
03-Jul-2017 21:00:00, 1.58e-01  
03-Jul-2017 22:00:00, 1.58e-01  
03-Jul-2017 23:00:00, 1.58e-01  
04-Jul-2017, 1.58e-01  
04-Jul-2017 01:00:00, 1.58e-01  
04-Jul-2017 02:00:00, 1.58e-01  
04-Jul-2017 03:00:00, 1.58e-01  
04-Jul-2017 04:00:00, 1.58e-01  
04-Jul-2017 05:00:00, 1.58e-01  
04-Jul-2017 06:00:00, 1.59e-01  
04-Jul-2017 07:00:00, 1.59e-01  
04-Jul-2017 08:00:00, 1.58e-01  
04-Jul-2017 09:00:00, 1.58e-01  
04-Jul-2017 10:00:00, 1.57e-01  
04-Jul-2017 11:00:00, 1.57e-01  
04-Jul-2017 12:00:00, 1.57e-01  
04-Jul-2017 13:00:00, 1.56e-01  
04-Jul-2017 14:00:00, 1.56e-01  
04-Jul-2017 15:00:00, 1.55e-01  
04-Jul-2017 16:00:00, 1.55e-01  
04-Jul-2017 17:00:00, 1.55e-01  
04-Jul-2017 18:00:00, 1.55e-01



04-Jul-2017 19:00:00, 1.55e-01  
04-Jul-2017 20:00:00, 1.55e-01  
04-Jul-2017 21:00:00, 1.55e-01  
04-Jul-2017 22:00:00, 1.55e-01  
04-Jul-2017 23:00:00, 1.55e-01  
05-Jul-2017, 1.55e-01  
05-Jul-2017 01:00:00, 1.55e-01  
05-Jul-2017 02:00:00, 1.55e-01  
05-Jul-2017 03:00:00, 1.55e-01  
05-Jul-2017 04:00:00, 1.55e-01  
05-Jul-2017 05:00:00, 1.55e-01  
05-Jul-2017 06:00:00, 1.55e-01  
05-Jul-2017 07:00:00, 1.55e-01  
05-Jul-2017 08:00:00, 1.55e-01  
05-Jul-2017 09:00:00, 1.55e-01  
05-Jul-2017 10:00:00, 1.55e-01  
05-Jul-2017 11:00:00, 1.54e-01  
05-Jul-2017 12:00:00, 1.53e-01  
05-Jul-2017 13:00:00, 1.53e-01  
05-Jul-2017 14:00:00, 1.53e-01  
05-Jul-2017 15:00:00, 1.52e-01  
05-Jul-2017 16:00:00, 1.51e-01  
05-Jul-2017 17:00:00, 1.51e-01  
05-Jul-2017 18:00:00, 1.51e-01  
05-Jul-2017 19:00:00, 1.51e-01  
05-Jul-2017 20:00:00, 1.51e-01  
05-Jul-2017 21:00:00, 1.51e-01  
05-Jul-2017 22:00:00, 1.51e-01  
05-Jul-2017 23:00:00, 1.51e-01  
06-Jul-2017, 1.51e-01  
06-Jul-2017 01:00:00, 1.51e-01  
06-Jul-2017 02:00:00, 1.51e-01  
06-Jul-2017 03:00:00, 1.51e-01  
06-Jul-2017 04:00:00, 1.51e-01  
06-Jul-2017 05:00:00, 1.51e-01  
06-Jul-2017 06:00:00, 1.51e-01  
06-Jul-2017 07:00:00, 1.51e-01  
06-Jul-2017 08:00:00, 1.51e-01  
06-Jul-2017 09:00:00, 1.51e-01  
06-Jul-2017 10:00:00, 1.51e-01  
06-Jul-2017 11:00:00, 1.51e-01  
06-Jul-2017 12:00:00, 1.50e-01  
06-Jul-2017 13:00:00, 1.49e-01  
06-Jul-2017 14:00:00, 1.49e-01  
06-Jul-2017 15:00:00, 1.49e-01  
06-Jul-2017 16:00:00, 1.49e-01  
06-Jul-2017 17:00:00, 1.49e-01  
06-Jul-2017 18:00:00, 1.49e-01  
06-Jul-2017 19:00:00, 1.49e-01  
06-Jul-2017 20:00:00, 1.49e-01  
06-Jul-2017 21:00:00, 1.49e-01  
06-Jul-2017 22:00:00, 1.49e-01  
06-Jul-2017 23:00:00, 1.49e-01  
07-Jul-2017, 1.49e-01  
07-Jul-2017 01:00:00, 1.49e-01  
07-Jul-2017 02:00:00, 1.49e-01  
07-Jul-2017 03:00:00, 1.49e-01  
07-Jul-2017 04:00:00, 1.49e-01  
07-Jul-2017 05:00:00, 1.49e-01  
07-Jul-2017 06:00:00, 1.49e-01  
07-Jul-2017 07:00:00, 1.49e-01  
07-Jul-2017 08:00:00, 1.49e-01  
07-Jul-2017 09:00:00, 1.49e-01  
07-Jul-2017 10:00:00, 1.49e-01

07-Jul-2017 11:00:00, 1.49e-01  
07-Jul-2017 12:00:00, 1.48e-01  
07-Jul-2017 13:00:00, 1.47e-01  
07-Jul-2017 14:00:00, 1.47e-01  
07-Jul-2017 15:00:00, 1.47e-01  
07-Jul-2017 16:00:00, 1.46e-01  
07-Jul-2017 17:00:00, 1.45e-01  
07-Jul-2017 18:00:00, 1.45e-01  
07-Jul-2017 19:00:00, 1.45e-01  
07-Jul-2017 20:00:00, 1.45e-01  
07-Jul-2017 21:00:00, 1.45e-01  
07-Jul-2017 22:00:00, 1.45e-01  
07-Jul-2017 23:00:00, 1.45e-01  
08-Jul-2017, 1.45e-01  
08-Jul-2017 01:00:00, 1.45e-01  
08-Jul-2017 02:00:00, 1.45e-01  
08-Jul-2017 03:00:00, 1.45e-01  
08-Jul-2017 04:00:00, 1.45e-01  
08-Jul-2017 05:00:00, 1.45e-01  
08-Jul-2017 06:00:00, 1.46e-01  
08-Jul-2017 07:00:00, 1.46e-01  
08-Jul-2017 08:00:00, 1.45e-01  
08-Jul-2017 09:00:00, 1.45e-01  
08-Jul-2017 10:00:00, 1.45e-01  
08-Jul-2017 11:00:00, 1.45e-01  
08-Jul-2017 12:00:00, 1.45e-01  
08-Jul-2017 13:00:00, 1.44e-01  
08-Jul-2017 14:00:00, 1.43e-01  
08-Jul-2017 15:00:00, 1.43e-01  
08-Jul-2017 16:00:00, 1.42e-01  
08-Jul-2017 17:00:00, 1.42e-01  
08-Jul-2017 18:00:00, 1.41e-01  
08-Jul-2017 19:00:00, 1.41e-01  
08-Jul-2017 20:00:00, 1.41e-01  
08-Jul-2017 21:00:00, 1.41e-01  
08-Jul-2017 22:00:00, 1.42e-01  
08-Jul-2017 23:00:00, 1.42e-01  
09-Jul-2017, 1.42e-01  
09-Jul-2017 01:00:00, 1.42e-01  
09-Jul-2017 02:00:00, 1.42e-01  
09-Jul-2017 03:00:00, 1.42e-01  
09-Jul-2017 04:00:00, 1.43e-01  
09-Jul-2017 05:00:00, 1.43e-01  
09-Jul-2017 06:00:00, 1.43e-01  
09-Jul-2017 07:00:00, 1.43e-01  
09-Jul-2017 08:00:00, 1.43e-01  
09-Jul-2017 09:00:00, 1.42e-01  
09-Jul-2017 10:00:00, 1.41e-01  
09-Jul-2017 11:00:00, 1.41e-01  
09-Jul-2017 12:00:00, 1.41e-01  
09-Jul-2017 13:00:00, 1.40e-01  
09-Jul-2017 14:00:00, 1.39e-01  
09-Jul-2017 15:00:00, 1.39e-01  
09-Jul-2017 16:00:00, 1.39e-01  
09-Jul-2017 17:00:00, 1.38e-01  
09-Jul-2017 18:00:00, 1.38e-01  
09-Jul-2017 19:00:00, 1.37e-01  
09-Jul-2017 20:00:00, 1.37e-01  
09-Jul-2017 21:00:00, 1.37e-01  
09-Jul-2017 22:00:00, 1.38e-01  
09-Jul-2017 23:00:00, 1.38e-01  
10-Jul-2017, 1.38e-01  
10-Jul-2017 01:00:00, 1.38e-01  
10-Jul-2017 02:00:00, 1.39e-01

10-Jul-2017 03:00:00, 1.39e-01  
10-Jul-2017 04:00:00, 1.39e-01  
10-Jul-2017 05:00:00, 1.39e-01  
10-Jul-2017 06:00:00, 1.39e-01  
10-Jul-2017 07:00:00, 1.39e-01  
10-Jul-2017 08:00:00, 1.39e-01  
10-Jul-2017 09:00:00, 1.39e-01  
10-Jul-2017 10:00:00, 1.38e-01  
10-Jul-2017 11:00:00, 1.37e-01  
10-Jul-2017 12:00:00, 1.37e-01  
10-Jul-2017 13:00:00, 1.36e-01  
10-Jul-2017 14:00:00, 1.35e-01  
10-Jul-2017 15:00:00, 1.35e-01  
10-Jul-2017 16:00:00, 1.35e-01  
10-Jul-2017 17:00:00, 1.34e-01  
10-Jul-2017 18:00:00, 1.33e-01  
10-Jul-2017 19:00:00, 1.33e-01  
10-Jul-2017 20:00:00, 1.33e-01  
10-Jul-2017 21:00:00, 1.33e-01  
10-Jul-2017 22:00:00, 1.33e-01  
10-Jul-2017 23:00:00, 1.33e-01  
11-Jul-2017, 1.34e-01  
11-Jul-2017 01:00:00, 1.34e-01  
11-Jul-2017 02:00:00, 1.34e-01  
11-Jul-2017 03:00:00, 1.35e-01  
11-Jul-2017 04:00:00, 1.35e-01  
11-Jul-2017 05:00:00, 1.35e-01  
11-Jul-2017 06:00:00, 1.35e-01  
11-Jul-2017 07:00:00, 1.35e-01  
11-Jul-2017 08:00:00, 1.35e-01  
11-Jul-2017 09:00:00, 1.35e-01  
11-Jul-2017 10:00:00, 1.34e-01  
11-Jul-2017 11:00:00, 1.33e-01  
11-Jul-2017 12:00:00, 1.33e-01  
11-Jul-2017 13:00:00, 1.33e-01  
11-Jul-2017 14:00:00, 1.33e-01  
11-Jul-2017 15:00:00, 1.32e-01  
11-Jul-2017 16:00:00, 1.31e-01  
11-Jul-2017 17:00:00, 1.31e-01  
11-Jul-2017 18:00:00, 1.31e-01  
11-Jul-2017 19:00:00, 1.32e-01  
11-Jul-2017 20:00:00, 1.32e-01  
11-Jul-2017 21:00:00, 1.32e-01  
11-Jul-2017 22:00:00, 1.32e-01  
11-Jul-2017 23:00:00, 1.33e-01  
12-Jul-2017, 1.33e-01  
12-Jul-2017 01:00:00, 1.33e-01  
12-Jul-2017 02:00:00, 1.33e-01  
12-Jul-2017 03:00:00, 1.31e-01  
12-Jul-2017 04:00:00, 1.31e-01  
12-Jul-2017 05:00:00, 1.31e-01  
12-Jul-2017 06:00:00, 1.32e-01  
12-Jul-2017 07:00:00, 1.32e-01  
12-Jul-2017 08:00:00, 1.33e-01  
12-Jul-2017 09:00:00, 1.33e-01  
12-Jul-2017 10:00:00, 1.33e-01  
12-Jul-2017 11:00:00, 1.33e-01  
12-Jul-2017 12:00:00, 1.33e-01  
12-Jul-2017 13:00:00, 1.32e-01  
12-Jul-2017 14:00:00, 1.31e-01  
12-Jul-2017 15:00:00, 1.31e-01  
12-Jul-2017 16:00:00, 1.31e-01  
12-Jul-2017 17:00:00, 1.31e-01  
12-Jul-2017 18:00:00, 1.29e-01

12-Jul-2017 19:00:00, 1.28e-01  
12-Jul-2017 20:00:00, 1.29e-01  
12-Jul-2017 21:00:00, 1.29e-01  
12-Jul-2017 22:00:00, 1.29e-01  
12-Jul-2017 23:00:00, 1.30e-01  
13-Jul-2017, 1.29e-01  
13-Jul-2017 01:00:00, 1.29e-01  
13-Jul-2017 02:00:00, 1.29e-01  
13-Jul-2017 03:00:00, 1.30e-01  
13-Jul-2017 04:00:00, 1.30e-01  
13-Jul-2017 05:00:00, 1.30e-01  
13-Jul-2017 06:00:00, 1.30e-01  
13-Jul-2017 07:00:00, 1.30e-01  
13-Jul-2017 08:00:00, 1.30e-01  
13-Jul-2017 09:00:00, 1.31e-01  
13-Jul-2017 10:00:00, 1.32e-01  
13-Jul-2017 11:00:00, 1.31e-01  
13-Jul-2017 12:00:00, 1.31e-01  
13-Jul-2017 13:00:00, 1.31e-01  
13-Jul-2017 14:00:00, 1.30e-01  
13-Jul-2017 15:00:00, 1.30e-01  
13-Jul-2017 16:00:00, 1.30e-01  
13-Jul-2017 17:00:00, 1.29e-01  
13-Jul-2017 18:00:00, 1.28e-01  
13-Jul-2017 19:00:00, 1.30e-01  
13-Jul-2017 20:00:00, 1.30e-01  
13-Jul-2017 21:00:00, 1.30e-01  
13-Jul-2017 22:00:00, 1.31e-01  
13-Jul-2017 23:00:00, 1.31e-01  
14-Jul-2017, 1.31e-01  
14-Jul-2017 01:00:00, 1.31e-01  
14-Jul-2017 02:00:00, 1.31e-01  
14-Jul-2017 03:00:00, 1.31e-01  
14-Jul-2017 04:00:00, 1.31e-01  
14-Jul-2017 05:00:00, 1.31e-01  
14-Jul-2017 06:00:00, 1.31e-01  
14-Jul-2017 07:00:00, 1.31e-01  
14-Jul-2017 08:00:00, 1.31e-01  
14-Jul-2017 09:00:00, 1.31e-01  
14-Jul-2017 10:00:00, 1.31e-01  
14-Jul-2017 11:00:00, 1.30e-01  
14-Jul-2017 12:00:00, 1.29e-01  
14-Jul-2017 13:00:00, 1.29e-01  
14-Jul-2017 14:00:00, 1.29e-01  
14-Jul-2017 15:00:00, 1.28e-01  
14-Jul-2017 16:00:00, 1.26e-01  
14-Jul-2017 17:00:00, 1.25e-01  
14-Jul-2017 18:00:00, 1.25e-01  
14-Jul-2017 19:00:00, 1.27e-01  
14-Jul-2017 20:00:00, 1.27e-01  
14-Jul-2017 21:00:00, 1.28e-01  
14-Jul-2017 22:00:00, 1.28e-01  
14-Jul-2017 23:00:00, 1.29e-01  
15-Jul-2017, 1.29e-01  
15-Jul-2017 01:00:00, 1.29e-01  
15-Jul-2017 02:00:00, 1.29e-01  
15-Jul-2017 03:00:00, 1.29e-01  
15-Jul-2017 04:00:00, 1.29e-01  
15-Jul-2017 05:00:00, 1.29e-01  
15-Jul-2017 06:00:00, 1.29e-01  
15-Jul-2017 07:00:00, 1.29e-01  
15-Jul-2017 08:00:00, 1.29e-01  
15-Jul-2017 09:00:00, 1.29e-01  
15-Jul-2017 10:00:00, 1.29e-01

15-Jul-2017 11:00:00, 1.29e-01  
15-Jul-2017 12:00:00, 1.28e-01  
15-Jul-2017 13:00:00, 1.27e-01  
15-Jul-2017 14:00:00, 1.27e-01  
15-Jul-2017 15:00:00, 1.27e-01  
15-Jul-2017 16:00:00, 1.27e-01  
15-Jul-2017 17:00:00, 1.27e-01  
15-Jul-2017 18:00:00, 1.26e-01  
15-Jul-2017 19:00:00, 1.26e-01  
15-Jul-2017 20:00:00, 1.26e-01  
15-Jul-2017 21:00:00, 1.26e-01  
15-Jul-2017 22:00:00, 1.27e-01  
15-Jul-2017 23:00:00, 1.27e-01  
16-Jul-2017, 1.27e-01  
16-Jul-2017 01:00:00, 1.27e-01  
16-Jul-2017 02:00:00, 1.27e-01  
16-Jul-2017 03:00:00, 1.27e-01  
16-Jul-2017 04:00:00, 1.27e-01  
16-Jul-2017 05:00:00, 1.27e-01  
16-Jul-2017 06:00:00, 1.27e-01  
16-Jul-2017 07:00:00, 1.27e-01  
16-Jul-2017 08:00:00, 1.27e-01  
16-Jul-2017 09:00:00, 1.27e-01  
16-Jul-2017 10:00:00, 1.27e-01  
16-Jul-2017 11:00:00, 1.27e-01  
16-Jul-2017 12:00:00, 1.27e-01  
16-Jul-2017 13:00:00, 1.27e-01  
16-Jul-2017 14:00:00, 1.26e-01  
16-Jul-2017 15:00:00, 1.25e-01  
16-Jul-2017 16:00:00, 1.25e-01  
16-Jul-2017 17:00:00, 1.25e-01  
16-Jul-2017 18:00:00, 1.25e-01  
16-Jul-2017 19:00:00, 1.25e-01  
16-Jul-2017 20:00:00, 1.25e-01  
16-Jul-2017 21:00:00, 1.25e-01  
16-Jul-2017 22:00:00, 1.25e-01  
16-Jul-2017 23:00:00, 1.25e-01  
17-Jul-2017, 1.25e-01  
17-Jul-2017 01:00:00, 1.26e-01  
17-Jul-2017 02:00:00, 1.26e-01  
17-Jul-2017 03:00:00, 1.27e-01  
17-Jul-2017 04:00:00, 1.27e-01  
17-Jul-2017 05:00:00, 1.27e-01  
17-Jul-2017 06:00:00, 1.27e-01  
17-Jul-2017 07:00:00, 1.27e-01  
17-Jul-2017 08:00:00, 1.27e-01  
17-Jul-2017 09:00:00, 1.27e-01  
17-Jul-2017 10:00:00, 1.26e-01  
17-Jul-2017 11:00:00, 1.25e-01  
17-Jul-2017 12:00:00, 1.25e-01  
17-Jul-2017 13:00:00, 1.25e-01  
17-Jul-2017 14:00:00, 1.25e-01  
17-Jul-2017 15:00:00, 1.24e-01  
17-Jul-2017 16:00:00, 1.23e-01  
17-Jul-2017 17:00:00, 1.23e-01  
17-Jul-2017 18:00:00, 1.24e-01  
17-Jul-2017 19:00:00, 1.24e-01  
17-Jul-2017 20:00:00, 1.24e-01  
17-Jul-2017 21:00:00, 1.24e-01  
17-Jul-2017 22:00:00, 1.24e-01  
17-Jul-2017 23:00:00, 1.25e-01  
18-Jul-2017, 1.25e-01  
18-Jul-2017 01:00:00, 1.25e-01  
18-Jul-2017 02:00:00, 1.25e-01

18-Jul-2017 03:00:00, 1.25e-01  
18-Jul-2017 04:00:00, 1.25e-01  
18-Jul-2017 05:00:00, 1.25e-01  
18-Jul-2017 06:00:00, 1.25e-01  
18-Jul-2017 07:00:00, 1.25e-01  
18-Jul-2017 08:00:00, 1.25e-01  
18-Jul-2017 09:00:00, 1.25e-01  
18-Jul-2017 10:00:00, 1.25e-01  
18-Jul-2017 11:00:00, 1.25e-01  
18-Jul-2017 12:00:00, 1.23e-01  
18-Jul-2017 13:00:00, 1.23e-01  
18-Jul-2017 14:00:00, 1.23e-01  
18-Jul-2017 15:00:00, 1.23e-01  
18-Jul-2017 16:00:00, 1.22e-01  
18-Jul-2017 17:00:00, 1.22e-01  
18-Jul-2017 18:00:00, 1.22e-01  
18-Jul-2017 19:00:00, 1.22e-01  
18-Jul-2017 20:00:00, 1.22e-01  
18-Jul-2017 21:00:00, 1.22e-01  
18-Jul-2017 22:00:00, 1.23e-01  
18-Jul-2017 23:00:00, 1.23e-01  
19-Jul-2017, 1.23e-01  
19-Jul-2017 01:00:00, 1.23e-01  
19-Jul-2017 02:00:00, 1.23e-01  
19-Jul-2017 03:00:00, 1.23e-01  
19-Jul-2017 04:00:00, 1.23e-01  
19-Jul-2017 05:00:00, 1.23e-01  
19-Jul-2017 06:00:00, 1.23e-01  
19-Jul-2017 07:00:00, 1.23e-01  
19-Jul-2017 08:00:00, 1.23e-01  
19-Jul-2017 09:00:00, 1.23e-01  
19-Jul-2017 10:00:00, 1.23e-01  
19-Jul-2017 11:00:00, 1.23e-01  
19-Jul-2017 12:00:00, 1.22e-01  
19-Jul-2017 13:00:00, 1.22e-01  
19-Jul-2017 14:00:00, 1.21e-01  
19-Jul-2017 15:00:00, 1.21e-01  
19-Jul-2017 16:00:00, 1.21e-01  
19-Jul-2017 17:00:00, 1.21e-01  
19-Jul-2017 18:00:00, 1.21e-01  
19-Jul-2017 19:00:00, 1.21e-01  
19-Jul-2017 20:00:00, 1.21e-01  
19-Jul-2017 21:00:00, 1.21e-01  
19-Jul-2017 22:00:00, 1.21e-01  
19-Jul-2017 23:00:00, 1.21e-01  
20-Jul-2017, 1.21e-01  
20-Jul-2017 01:00:00, 1.21e-01  
20-Jul-2017 02:00:00, 1.21e-01  
20-Jul-2017 03:00:00, 1.21e-01  
20-Jul-2017 04:00:00, 1.22e-01  
20-Jul-2017 05:00:00, 1.22e-01  
20-Jul-2017 06:00:00, 1.22e-01  
20-Jul-2017 07:00:00, 1.22e-01  
20-Jul-2017 08:00:00, 1.22e-01  
20-Jul-2017 09:00:00, 1.22e-01  
20-Jul-2017 10:00:00, 1.21e-01  
20-Jul-2017 11:00:00, 1.21e-01  
20-Jul-2017 12:00:00, 1.21e-01  
20-Jul-2017 13:00:00, 1.20e-01  
20-Jul-2017 14:00:00, 1.19e-01  
20-Jul-2017 15:00:00, 1.19e-01  
20-Jul-2017 16:00:00, 1.18e-01  
20-Jul-2017 17:00:00, 1.18e-01  
20-Jul-2017 18:00:00, 1.18e-01

20-Jul-2017 19:00:00, 1.18e-01  
20-Jul-2017 20:00:00, 1.18e-01  
20-Jul-2017 21:00:00, 1.18e-01  
20-Jul-2017 22:00:00, 1.18e-01  
20-Jul-2017 23:00:00, 1.18e-01  
21-Jul-2017, 1.18e-01  
21-Jul-2017 01:00:00, 1.18e-01  
21-Jul-2017 02:00:00, 1.18e-01  
21-Jul-2017 03:00:00, 1.18e-01  
21-Jul-2017 04:00:00, 1.19e-01  
21-Jul-2017 05:00:00, 1.19e-01  
21-Jul-2017 06:00:00, 1.19e-01  
21-Jul-2017 07:00:00, 1.19e-01  
21-Jul-2017 08:00:00, 1.19e-01  
21-Jul-2017 09:00:00, 1.19e-01  
21-Jul-2017 10:00:00, 1.18e-01  
21-Jul-2017 11:00:00, 1.18e-01  
21-Jul-2017 12:00:00, 1.17e-01  
21-Jul-2017 13:00:00, 1.17e-01  
21-Jul-2017 14:00:00, 1.17e-01  
21-Jul-2017 15:00:00, 1.17e-01  
21-Jul-2017 16:00:00, 1.16e-01  
21-Jul-2017 17:00:00, 1.15e-01  
21-Jul-2017 18:00:00, 1.15e-01  
21-Jul-2017 19:00:00, 1.15e-01  
21-Jul-2017 20:00:00, 1.15e-01  
21-Jul-2017 21:00:00, 1.16e-01  
21-Jul-2017 22:00:00, 1.16e-01  
21-Jul-2017 23:00:00, 1.16e-01  
22-Jul-2017, 1.17e-01  
22-Jul-2017 01:00:00, 1.17e-01  
22-Jul-2017 02:00:00, 1.17e-01  
22-Jul-2017 03:00:00, 1.17e-01  
22-Jul-2017 04:00:00, 1.17e-01  
22-Jul-2017 05:00:00, 1.17e-01  
22-Jul-2017 06:00:00, 1.17e-01  
22-Jul-2017 07:00:00, 1.17e-01  
22-Jul-2017 08:00:00, 1.17e-01  
22-Jul-2017 09:00:00, 1.17e-01  
22-Jul-2017 10:00:00, 1.17e-01  
22-Jul-2017 11:00:00, 1.16e-01  
22-Jul-2017 12:00:00, 1.15e-01  
22-Jul-2017 13:00:00, 1.15e-01  
22-Jul-2017 14:00:00, 1.14e-01  
22-Jul-2017 15:00:00, 1.14e-01  
22-Jul-2017 16:00:00, 1.14e-01  
22-Jul-2017 17:00:00, 1.14e-01  
22-Jul-2017 18:00:00, 1.14e-01  
22-Jul-2017 19:00:00, 1.14e-01  
22-Jul-2017 20:00:00, 1.14e-01  
22-Jul-2017 21:00:00, 1.14e-01  
22-Jul-2017 22:00:00, 1.14e-01  
22-Jul-2017 23:00:00, 1.14e-01  
23-Jul-2017, 1.15e-01  
23-Jul-2017 01:00:00, 1.15e-01  
23-Jul-2017 02:00:00, 1.15e-01  
23-Jul-2017 03:00:00, 1.15e-01  
23-Jul-2017 04:00:00, 1.15e-01  
23-Jul-2017 05:00:00, 1.15e-01  
23-Jul-2017 06:00:00, 1.15e-01  
23-Jul-2017 07:00:00, 1.15e-01  
23-Jul-2017 08:00:00, 1.15e-01  
23-Jul-2017 09:00:00, 1.15e-01  
23-Jul-2017 10:00:00, 1.14e-01

23-Jul-2017 11:00:00, 1.14e-01  
23-Jul-2017 12:00:00, 1.13e-01  
23-Jul-2017 13:00:00, 1.12e-01  
23-Jul-2017 14:00:00, 1.12e-01  
23-Jul-2017 15:00:00, 1.12e-01  
23-Jul-2017 16:00:00, 1.11e-01  
23-Jul-2017 17:00:00, 1.11e-01  
23-Jul-2017 18:00:00, 1.12e-01  
23-Jul-2017 19:00:00, 1.12e-01  
23-Jul-2017 20:00:00, 1.09e-01  
23-Jul-2017 21:00:00, 1.07e-01  
23-Jul-2017 22:00:00, 1.08e-01  
23-Jul-2017 23:00:00, 1.09e-01  
24-Jul-2017, 1.10e-01  
24-Jul-2017 01:00:00, 1.11e-01  
24-Jul-2017 02:00:00, 1.11e-01  
24-Jul-2017 03:00:00, 1.11e-01  
24-Jul-2017 04:00:00, 1.11e-01  
24-Jul-2017 05:00:00, 1.11e-01  
24-Jul-2017 06:00:00, 1.11e-01  
24-Jul-2017 07:00:00, 1.11e-01  
24-Jul-2017 08:00:00, 1.11e-01  
24-Jul-2017 09:00:00, 1.12e-01  
24-Jul-2017 10:00:00, 1.12e-01  
24-Jul-2017 11:00:00, 1.12e-01  
24-Jul-2017 12:00:00, 1.11e-01  
24-Jul-2017 13:00:00, 1.10e-01  
24-Jul-2017 14:00:00, 1.10e-01  
24-Jul-2017 15:00:00, 1.09e-01  
24-Jul-2017 16:00:00, 1.08e-01  
24-Jul-2017 17:00:00, 1.08e-01  
24-Jul-2017 18:00:00, 1.08e-01  
24-Jul-2017 19:00:00, 1.08e-01  
24-Jul-2017 20:00:00, 1.08e-01  
24-Jul-2017 21:00:00, 1.08e-01  
24-Jul-2017 22:00:00, 1.08e-01  
24-Jul-2017 23:00:00, 1.08e-01  
25-Jul-2017, 1.08e-01  
25-Jul-2017 01:00:00, 1.09e-01  
25-Jul-2017 02:00:00, 1.09e-01  
25-Jul-2017 03:00:00, 1.10e-01  
25-Jul-2017 04:00:00, 1.09e-01  
25-Jul-2017 05:00:00, 1.08e-01  
25-Jul-2017 06:00:00, 1.09e-01  
25-Jul-2017 07:00:00, 1.09e-01  
25-Jul-2017 08:00:00, 1.09e-01  
25-Jul-2017 09:00:00, 1.10e-01  
25-Jul-2017 10:00:00, 1.11e-01  
25-Jul-2017 11:00:00, 1.11e-01  
25-Jul-2017 12:00:00, 1.10e-01  
25-Jul-2017 13:00:00, 1.09e-01  
25-Jul-2017 14:00:00, 1.09e-01  
25-Jul-2017 15:00:00, 1.08e-01  
25-Jul-2017 16:00:00, 1.08e-01  
25-Jul-2017 17:00:00, 1.09e-01  
25-Jul-2017 18:00:00, 1.08e-01  
25-Jul-2017 19:00:00, 1.08e-01  
25-Jul-2017 20:00:00, 1.04e-01  
25-Jul-2017 21:00:00, 1.05e-01  
25-Jul-2017 22:00:00, 1.06e-01  
25-Jul-2017 23:00:00, 1.07e-01  
26-Jul-2017, 1.07e-01  
26-Jul-2017 01:00:00, 1.07e-01  
26-Jul-2017 02:00:00, 1.07e-01



26-Jul-2017 03:00:00, 1.07e-01  
26-Jul-2017 04:00:00, 1.07e-01  
26-Jul-2017 05:00:00, 1.07e-01  
26-Jul-2017 06:00:00, 1.06e-01  
26-Jul-2017 07:00:00, 1.07e-01  
26-Jul-2017 08:00:00, 1.07e-01  
26-Jul-2017 09:00:00, 1.07e-01  
26-Jul-2017 10:00:00, 1.08e-01  
26-Jul-2017 11:00:00, 1.09e-01  
26-Jul-2017 12:00:00, 1.09e-01  
26-Jul-2017 13:00:00, 1.09e-01  
26-Jul-2017 14:00:00, 1.08e-01  
26-Jul-2017 15:00:00, 1.08e-01  
26-Jul-2017 16:00:00, 1.08e-01  
26-Jul-2017 17:00:00, 1.08e-01  
26-Jul-2017 18:00:00, 1.08e-01  
26-Jul-2017 19:00:00, 1.08e-01  
26-Jul-2017 20:00:00, 1.08e-01  
26-Jul-2017 21:00:00, 1.08e-01  
26-Jul-2017 22:00:00, 1.09e-01  
26-Jul-2017 23:00:00, 1.09e-01  
27-Jul-2017, 1.10e-01  
27-Jul-2017 01:00:00, 1.10e-01  
27-Jul-2017 02:00:00, 1.10e-01  
27-Jul-2017 03:00:00, 1.10e-01  
27-Jul-2017 04:00:00, 1.10e-01  
27-Jul-2017 05:00:00, 1.10e-01  
27-Jul-2017 06:00:00, 1.10e-01  
27-Jul-2017 07:00:00, 1.10e-01  
27-Jul-2017 08:00:00, 1.10e-01  
27-Jul-2017 09:00:00, 1.10e-01  
27-Jul-2017 10:00:00, 1.10e-01  
27-Jul-2017 11:00:00, 1.08e-01  
27-Jul-2017 12:00:00, 1.08e-01  
27-Jul-2017 13:00:00, 1.08e-01  
27-Jul-2017 14:00:00, 1.07e-01  
27-Jul-2017 15:00:00, 1.07e-01  
27-Jul-2017 16:00:00, 1.07e-01  
27-Jul-2017 17:00:00, 1.07e-01  
27-Jul-2017 18:00:00, 1.07e-01  
27-Jul-2017 19:00:00, 1.07e-01  
27-Jul-2017 20:00:00, 1.07e-01  
27-Jul-2017 21:00:00, 1.07e-01  
27-Jul-2017 22:00:00, 1.08e-01  
27-Jul-2017 23:00:00, 1.08e-01  
28-Jul-2017, 1.08e-01  
28-Jul-2017 01:00:00, 1.08e-01  
28-Jul-2017 02:00:00, 1.08e-01  
28-Jul-2017 03:00:00, 1.08e-01  
28-Jul-2017 04:00:00, 1.08e-01  
28-Jul-2017 05:00:00, 1.08e-01  
28-Jul-2017 06:00:00, 1.08e-01  
28-Jul-2017 07:00:00, 1.08e-01  
28-Jul-2017 08:00:00, 1.08e-01  
28-Jul-2017 09:00:00, 1.08e-01  
28-Jul-2017 10:00:00, 1.08e-01  
28-Jul-2017 11:00:00, 1.07e-01  
28-Jul-2017 12:00:00, 1.07e-01  
28-Jul-2017 13:00:00, 1.07e-01  
28-Jul-2017 14:00:00, 1.07e-01  
28-Jul-2017 15:00:00, 1.07e-01  
28-Jul-2017 16:00:00, 1.07e-01  
28-Jul-2017 17:00:00, 1.07e-01  
28-Jul-2017 18:00:00, 1.07e-01

28-Jul-2017 19:00:00, 1.07e-01  
28-Jul-2017 20:00:00, 1.07e-01  
28-Jul-2017 21:00:00, 1.08e-01  
28-Jul-2017 22:00:00, 1.07e-01  
28-Jul-2017 23:00:00, 1.06e-01  
29-Jul-2017, 1.06e-01  
29-Jul-2017 01:00:00, 1.05e-01  
29-Jul-2017 02:00:00, 1.05e-01  
29-Jul-2017 03:00:00, 1.05e-01  
29-Jul-2017 04:00:00, 1.05e-01  
29-Jul-2017 05:00:00, 1.06e-01  
29-Jul-2017 06:00:00, 1.05e-01  
29-Jul-2017 07:00:00, 1.05e-01  
29-Jul-2017 08:00:00, 1.05e-01  
29-Jul-2017 09:00:00, 1.06e-01  
29-Jul-2017 10:00:00, 1.07e-01  
29-Jul-2017 11:00:00, 1.08e-01  
29-Jul-2017 12:00:00, 1.08e-01  
29-Jul-2017 13:00:00, 1.07e-01  
29-Jul-2017 14:00:00, 1.07e-01  
29-Jul-2017 15:00:00, 1.07e-01  
29-Jul-2017 16:00:00, 1.07e-01  
29-Jul-2017 17:00:00, 1.07e-01  
29-Jul-2017 18:00:00, 1.07e-01  
29-Jul-2017 19:00:00, 1.07e-01  
29-Jul-2017 20:00:00, 1.05e-01  
29-Jul-2017 21:00:00, 1.04e-01  
29-Jul-2017 22:00:00, 1.04e-01  
29-Jul-2017 23:00:00, 1.04e-01  
30-Jul-2017, 1.05e-01  
30-Jul-2017 01:00:00, 1.05e-01  
30-Jul-2017 02:00:00, 1.05e-01  
30-Jul-2017 03:00:00, 1.05e-01  
30-Jul-2017 04:00:00, 1.05e-01  
30-Jul-2017 05:00:00, 1.05e-01  
30-Jul-2017 06:00:00, 1.06e-01  
30-Jul-2017 07:00:00, 1.06e-01  
30-Jul-2017 08:00:00, 1.06e-01  
30-Jul-2017 09:00:00, 1.07e-01  
30-Jul-2017 10:00:00, 1.08e-01  
30-Jul-2017 11:00:00, 1.07e-01  
30-Jul-2017 12:00:00, 1.07e-01  
30-Jul-2017 13:00:00, 1.06e-01  
30-Jul-2017 14:00:00, 1.05e-01  
30-Jul-2017 15:00:00, 1.05e-01  
30-Jul-2017 16:00:00, 1.05e-01  
30-Jul-2017 17:00:00, 1.05e-01  
30-Jul-2017 18:00:00, 1.05e-01  
30-Jul-2017 19:00:00, 1.06e-01  
30-Jul-2017 20:00:00, 1.06e-01  
30-Jul-2017 21:00:00, 1.07e-01  
30-Jul-2017 22:00:00, 1.07e-01  
30-Jul-2017 23:00:00, 1.07e-01  
31-Jul-2017, 1.07e-01  
31-Jul-2017 01:00:00, 1.07e-01  
31-Jul-2017 02:00:00, 1.07e-01  
31-Jul-2017 03:00:00, 1.07e-01  
31-Jul-2017 04:00:00, 1.07e-01  
31-Jul-2017 05:00:00, 1.07e-01  
31-Jul-2017 06:00:00, 1.07e-01  
31-Jul-2017 07:00:00, 1.08e-01  
31-Jul-2017 08:00:00, 1.07e-01  
31-Jul-2017 09:00:00, 1.07e-01  
31-Jul-2017 10:00:00, 1.07e-01

31-Jul-2017 11:00:00, 1.07e-01  
31-Jul-2017 12:00:00, 1.06e-01  
31-Jul-2017 13:00:00, 1.05e-01  
31-Jul-2017 14:00:00, 1.04e-01  
31-Jul-2017 15:00:00, 1.04e-01  
31-Jul-2017 16:00:00, 1.04e-01  
31-Jul-2017 17:00:00, 1.04e-01  
31-Jul-2017 18:00:00, 1.04e-01  
31-Jul-2017 19:00:00, 1.04e-01  
31-Jul-2017 20:00:00, 1.05e-01  
31-Jul-2017 21:00:00, 1.05e-01  
31-Jul-2017 22:00:00, 1.06e-01  
31-Jul-2017 23:00:00, 1.06e-01  
01-Aug-2017, 1.07e-01  
01-Aug-2017 01:00:00, 1.07e-01  
01-Aug-2017 02:00:00, 1.07e-01  
01-Aug-2017 03:00:00, 1.07e-01  
01-Aug-2017 04:00:00, 1.07e-01  
01-Aug-2017 05:00:00, 1.07e-01  
01-Aug-2017 06:00:00, 1.07e-01  
01-Aug-2017 07:00:00, 1.07e-01  
01-Aug-2017 08:00:00, 1.07e-01  
01-Aug-2017 09:00:00, 1.07e-01  
01-Aug-2017 10:00:00, 1.07e-01  
01-Aug-2017 11:00:00, 1.06e-01  
01-Aug-2017 12:00:00, 1.05e-01  
01-Aug-2017 13:00:00, 1.04e-01  
01-Aug-2017 14:00:00, 1.04e-01  
01-Aug-2017 15:00:00, 1.04e-01  
01-Aug-2017 16:00:00, 1.04e-01  
01-Aug-2017 17:00:00, 1.04e-01  
01-Aug-2017 18:00:00, 1.04e-01  
01-Aug-2017 19:00:00, 1.04e-01  
01-Aug-2017 20:00:00, 1.04e-01  
01-Aug-2017 21:00:00, 1.04e-01  
01-Aug-2017 22:00:00, 1.04e-01  
01-Aug-2017 23:00:00, 1.05e-01  
02-Aug-2017, 1.05e-01  
02-Aug-2017 01:00:00, 1.05e-01  
02-Aug-2017 02:00:00, 1.05e-01  
02-Aug-2017 03:00:00, 1.06e-01  
02-Aug-2017 04:00:00, 1.06e-01  
02-Aug-2017 05:00:00, 1.06e-01  
02-Aug-2017 06:00:00, 1.06e-01  
02-Aug-2017 07:00:00, 1.06e-01  
02-Aug-2017 08:00:00, 1.06e-01  
02-Aug-2017 09:00:00, 1.06e-01  
02-Aug-2017 10:00:00, 1.05e-01  
02-Aug-2017 11:00:00, 1.04e-01  
02-Aug-2017 12:00:00, 1.04e-01  
02-Aug-2017 13:00:00, 1.03e-01  
02-Aug-2017 14:00:00, 1.03e-01  
02-Aug-2017 15:00:00, 1.03e-01  
02-Aug-2017 16:00:00, 1.03e-01  
02-Aug-2017 17:00:00, 1.02e-01  
02-Aug-2017 18:00:00, 1.02e-01  
02-Aug-2017 19:00:00, 1.03e-01  
02-Aug-2017 20:00:00, 1.03e-01  
02-Aug-2017 21:00:00, 1.04e-01  
02-Aug-2017 22:00:00, 1.04e-01  
02-Aug-2017 23:00:00, 1.04e-01  
03-Aug-2017, 1.04e-01  
03-Aug-2017 01:00:00, 1.04e-01  
03-Aug-2017 02:00:00, 1.04e-01

03-Aug-2017 03:00:00, 1.04e-01  
03-Aug-2017 04:00:00, 1.04e-01  
03-Aug-2017 05:00:00, 1.04e-01  
03-Aug-2017 06:00:00, 1.04e-01  
03-Aug-2017 07:00:00, 1.04e-01  
03-Aug-2017 08:00:00, 1.04e-01  
03-Aug-2017 09:00:00, 1.05e-01  
03-Aug-2017 10:00:00, 1.03e-01  
03-Aug-2017 11:00:00, 1.04e-01  
03-Aug-2017 12:00:00, 1.04e-01  
03-Aug-2017 13:00:00, 1.04e-01  
03-Aug-2017 14:00:00, 1.04e-01  
03-Aug-2017 15:00:00, 1.03e-01  
03-Aug-2017 16:00:00, 1.02e-01  
03-Aug-2017 17:00:00, 1.02e-01  
03-Aug-2017 18:00:00, 1.02e-01  
03-Aug-2017 19:00:00, 1.02e-01  
03-Aug-2017 20:00:00, 1.02e-01  
03-Aug-2017 21:00:00, 1.03e-01  
03-Aug-2017 22:00:00, 1.03e-01  
03-Aug-2017 23:00:00, 1.04e-01  
04-Aug-2017, 1.04e-01  
04-Aug-2017 01:00:00, 1.04e-01  
04-Aug-2017 02:00:00, 1.04e-01  
04-Aug-2017 03:00:00, 1.04e-01  
04-Aug-2017 04:00:00, 1.04e-01  
04-Aug-2017 05:00:00, 1.04e-01  
04-Aug-2017 06:00:00, 1.04e-01  
04-Aug-2017 07:00:00, 1.04e-01  
04-Aug-2017 08:00:00, 1.04e-01  
04-Aug-2017 09:00:00, 1.04e-01  
04-Aug-2017 10:00:00, 1.04e-01  
04-Aug-2017 11:00:00, 1.03e-01  
04-Aug-2017 12:00:00, 1.02e-01  
04-Aug-2017 13:00:00, 1.02e-01  
04-Aug-2017 14:00:00, 1.02e-01  
04-Aug-2017 15:00:00, 1.01e-01  
04-Aug-2017 16:00:00, 1.01e-01  
04-Aug-2017 17:00:00, 1.01e-01  
04-Aug-2017 18:00:00, 1.01e-01  
04-Aug-2017 19:00:00, 1.01e-01  
04-Aug-2017 20:00:00, 1.02e-01  
04-Aug-2017 21:00:00, 1.02e-01  
04-Aug-2017 22:00:00, 1.02e-01  
04-Aug-2017 23:00:00, 1.02e-01  
05-Aug-2017, 1.02e-01  
05-Aug-2017 01:00:00, 1.02e-01  
05-Aug-2017 02:00:00, 1.02e-01  
05-Aug-2017 03:00:00, 1.02e-01  
05-Aug-2017 04:00:00, 1.02e-01  
05-Aug-2017 05:00:00, 1.03e-01  
05-Aug-2017 06:00:00, 1.03e-01  
05-Aug-2017 07:00:00, 1.03e-01  
05-Aug-2017 08:00:00, 1.03e-01  
05-Aug-2017 09:00:00, 1.03e-01  
05-Aug-2017 10:00:00, 1.03e-01  
05-Aug-2017 11:00:00, 1.02e-01  
05-Aug-2017 12:00:00, 1.02e-01  
05-Aug-2017 13:00:00, 1.01e-01  
05-Aug-2017 14:00:00, 1.01e-01  
05-Aug-2017 15:00:00, 1.01e-01  
05-Aug-2017 16:00:00, 1.01e-01  
05-Aug-2017 17:00:00, 1.01e-01  
05-Aug-2017 18:00:00, 1.01e-01

05-Aug-2017 19:00:00, 1.01e-01  
05-Aug-2017 20:00:00, 9.90e-02  
05-Aug-2017 21:00:00, 9.80e-02  
05-Aug-2017 22:00:00, 1.00e-01  
05-Aug-2017 23:00:00, 9.90e-02  
06-Aug-2017, 9.90e-02  
06-Aug-2017 01:00:00, 1.00e-01  
06-Aug-2017 02:00:00, 1.00e-01  
06-Aug-2017 03:00:00, 1.01e-01  
06-Aug-2017 04:00:00, 1.01e-01  
06-Aug-2017 05:00:00, 1.01e-01  
06-Aug-2017 06:00:00, 1.01e-01  
06-Aug-2017 07:00:00, 1.01e-01  
06-Aug-2017 08:00:00, 1.01e-01  
06-Aug-2017 09:00:00, 1.02e-01  
06-Aug-2017 10:00:00, 1.02e-01  
06-Aug-2017 11:00:00, 1.01e-01  
06-Aug-2017 12:00:00, 1.01e-01  
06-Aug-2017 13:00:00, 1.01e-01  
06-Aug-2017 14:00:00, 1.01e-01  
06-Aug-2017 15:00:00, 1.01e-01  
06-Aug-2017 16:00:00, 1.00e-01  
06-Aug-2017 17:00:00, 1.00e-01  
06-Aug-2017 18:00:00, 1.00e-01  
06-Aug-2017 19:00:00, 1.00e-01  
06-Aug-2017 20:00:00, 1.00e-01  
06-Aug-2017 21:00:00, 1.01e-01  
06-Aug-2017 22:00:00, 1.01e-01  
06-Aug-2017 23:00:00, 1.01e-01  
07-Aug-2017, 1.01e-01  
07-Aug-2017 01:00:00, 1.01e-01  
07-Aug-2017 02:00:00, 1.01e-01  
07-Aug-2017 03:00:00, 1.01e-01  
07-Aug-2017 04:00:00, 1.01e-01  
07-Aug-2017 05:00:00, 1.01e-01  
07-Aug-2017 06:00:00, 1.01e-01  
07-Aug-2017 07:00:00, 1.01e-01  
07-Aug-2017 08:00:00, 1.01e-01  
07-Aug-2017 09:00:00, 1.01e-01  
07-Aug-2017 10:00:00, 1.01e-01  
07-Aug-2017 11:00:00, 1.01e-01  
07-Aug-2017 12:00:00, 1.01e-01  
07-Aug-2017 13:00:00, 1.01e-01  
07-Aug-2017 14:00:00, 1.01e-01  
07-Aug-2017 15:00:00, 1.00e-01  
07-Aug-2017 16:00:00, 9.90e-02  
07-Aug-2017 17:00:00, 9.90e-02  
07-Aug-2017 18:00:00, 9.90e-02  
07-Aug-2017 19:00:00, 9.90e-02  
07-Aug-2017 20:00:00, 9.40e-02  
07-Aug-2017 21:00:00, 9.50e-02  
07-Aug-2017 22:00:00, 9.60e-02  
07-Aug-2017 23:00:00, 9.60e-02  
08-Aug-2017, 9.60e-02  
08-Aug-2017 01:00:00, 9.40e-02  
08-Aug-2017 02:00:00, 9.40e-02  
08-Aug-2017 03:00:00, 9.40e-02  
08-Aug-2017 04:00:00, 9.40e-02  
08-Aug-2017 05:00:00, 9.40e-02  
08-Aug-2017 06:00:00, 9.40e-02  
08-Aug-2017 07:00:00, 9.40e-02  
08-Aug-2017 08:00:00, 9.60e-02  
08-Aug-2017 09:00:00, 9.80e-02  
08-Aug-2017 10:00:00, 1.00e-01

08-Aug-2017 11:00:00, 1.00e-01  
08-Aug-2017 12:00:00, 1.00e-01  
08-Aug-2017 13:00:00, 9.90e-02  
08-Aug-2017 14:00:00, 9.70e-02  
08-Aug-2017 15:00:00, 9.90e-02  
08-Aug-2017 16:00:00, 9.90e-02  
08-Aug-2017 17:00:00, 9.90e-02  
08-Aug-2017 18:00:00, 9.80e-02  
08-Aug-2017 19:00:00, 9.90e-02  
08-Aug-2017 20:00:00, 9.50e-02  
08-Aug-2017 21:00:00, 9.60e-02  
08-Aug-2017 22:00:00, 9.60e-02  
08-Aug-2017 23:00:00, 9.60e-02  
09-Aug-2017, 9.60e-02  
09-Aug-2017 01:00:00, 9.70e-02  
09-Aug-2017 02:00:00, 9.60e-02  
09-Aug-2017 03:00:00, 9.70e-02  
09-Aug-2017 04:00:00, 9.70e-02  
09-Aug-2017 05:00:00, 9.70e-02  
09-Aug-2017 06:00:00, 9.70e-02  
09-Aug-2017 07:00:00, 9.80e-02  
09-Aug-2017 08:00:00, 9.80e-02  
09-Aug-2017 09:00:00, 9.90e-02  
09-Aug-2017 10:00:00, 1.00e-01  
09-Aug-2017 11:00:00, 9.90e-02  
09-Aug-2017 12:00:00, 9.90e-02  
09-Aug-2017 13:00:00, 9.80e-02  
09-Aug-2017 14:00:00, 9.80e-02  
09-Aug-2017 15:00:00, 9.80e-02  
09-Aug-2017 16:00:00, 9.80e-02  
09-Aug-2017 17:00:00, 9.80e-02  
09-Aug-2017 18:00:00, 9.80e-02  
09-Aug-2017 19:00:00, 9.80e-02  
09-Aug-2017 20:00:00, 9.80e-02  
09-Aug-2017 21:00:00, 9.80e-02  
09-Aug-2017 22:00:00, 9.80e-02  
09-Aug-2017 23:00:00, 9.80e-02  
10-Aug-2017, 9.80e-02  
10-Aug-2017 01:00:00, 9.90e-02  
10-Aug-2017 02:00:00, 9.90e-02  
10-Aug-2017 03:00:00, 9.80e-02  
10-Aug-2017 04:00:00, 9.70e-02  
10-Aug-2017 05:00:00, 9.80e-02  
10-Aug-2017 06:00:00, 9.80e-02  
NaT, 9.80e-02  
NaT, 9.80e-02  
NaT, 9.80e-02  
NaT, 9.90e-02  
NaT, 9.80e-02  
NaT, 9.80e-02  
NaT, 9.80e-02  
NaT, 9.70e-02  
NaT, 9.80e-02  
NaT, 9.80e-02  
NaT, 9.80e-02  
NaT, 9.80e-02  
NaT, 9.80e-02

[illegible]

[illegible]



[illegible]

NaT, 9.30e-02  
NaT, 9.20e-02  
NaT, 9.20e-02  
NaT, 9.20e-02  
NaT, 9.20e-02  
NaT, 9.30e-02  
NaT, 9.20e-02  
NaT, 9.20e-02  
NaT, 9.20e-02  
NaT, 9.20e-02  
NaT, 9.10e-02  
NaT, 9.10e-02  
NaT, 9.10e-02  
NaT, 9.10e-02  
NaT, 9.10e-02  
NaT, 9.10e-02  
NaT, 9.20e-02  
NaT, 9.30e-02  
NaT, 9.30e-02  
NaT, 9.30e-02  
NaT, 9.30e-02  
NaT, 9.20e-02  
NaT, 9.20e-02  
NaT, 9.20e-02  
NaT, 9.20e-02  
NaT, 9.10e-02  
NaT, 9.10e-02  
NaT, 9.10e-02  
NaT, 9.10e-02

[illegible]

[illegible]

[illegible]

[illegible]

[illegible]

[illegible]



[illegible]

[illegible]

[illegible]

[illegible]

[illegible]

[illegible]

[illegible]

[illegible]



NaT, 7.90e-02  
NaT, 7.90e-02  
NaT, 7.90e-02  
NaT, 7.90e-02  
NaT, 7.90e-02  
NaT, 7.80e-02  
NaT, 7.60e-02  
NaT, 7.50e-02  
NaT, 7.50e-02  
NaT, 7.50e-02  
NaT, 7.80e-02  
NaT, 7.90e-02  
NaT, 7.90e-02  
NaT, 7.90e-02  
NaT, 7.90e-02  
NaT, 7.90e-02  
NaT, 7.90e-02  
NaT, 8.00e-02  
NaT, 8.00e-02  
NaT, 8.00e-02  
NaT, 8.00e-02  
NaT, 7.90e-02  
NaT, 7.70e-02  
NaT, 7.60e-02  
NaT, 7.50e-02  
NaT, 7.60e-02  
NaT, 7.70e-02  
NaT, 7.70e-02  
NaT, 8.00e-02  
NaT, 7.90e-02  
NaT, 8.00e-02  
NaT, 8.00e-02  
NaT, 8.00e-02  
NaT, 8.00e-02  
NaT, 8.00e-02  
NaT, 8.00e-02  
NaT, 7.90e-02  
NaT, 7.80e-02  
NaT, 7.60e-02  
NaT, 7.60e-02  
NaT, 7.90e-02  
NaT, 7.80e-02  
NaT, 7.90e-02  
NaT, 7.90e-02  
NaT, 7.90e-02  
NaT, 7.90e-02  
NaT, 8.00e-02  
NaT, 8.00e-02

[illegible]

[illegible]

[illegible]

[illegible]

[illegible]

[illegible]

[illegible]



[illegible]

[illegible]

[illegible]

[illegible]

NaT, 7.00e-02  
30-Oct-2017 07:00:00, 7.00e-02  
30-Oct-2017 08:00:00, 7.00e-02  
30-Oct-2017 09:00:00, 7.00e-02  
30-Oct-2017 10:00:00, 7.10e-02  
30-Oct-2017 11:00:00, 7.20e-02  
30-Oct-2017 12:00:00, 7.10e-02  
30-Oct-2017 13:00:00, 7.10e-02  
30-Oct-2017 14:00:00, 7.10e-02  
30-Oct-2017 15:00:00, 7.10e-02  
30-Oct-2017 16:00:00, 7.10e-02  
30-Oct-2017 17:00:00, 7.10e-02  
30-Oct-2017 18:00:00, 7.10e-02  
30-Oct-2017 19:00:00, 7.10e-02  
30-Oct-2017 20:00:00, 7.10e-02  
30-Oct-2017 21:00:00, 7.10e-02  
30-Oct-2017 22:00:00, 7.10e-02  
30-Oct-2017 23:00:00, 7.30e-02  
31-Oct-2017, 7.50e-02  
31-Oct-2017 01:00:00, 7.50e-02  
31-Oct-2017 02:00:00, 7.50e-02  
31-Oct-2017 03:00:00, 7.50e-02  
31-Oct-2017 04:00:00, 7.50e-02  
31-Oct-2017 05:00:00, 7.50e-02  
31-Oct-2017 06:00:00, 7.50e-02  
31-Oct-2017 07:00:00, 7.50e-02  
31-Oct-2017 08:00:00, 7.40e-02  
31-Oct-2017 09:00:00, 7.50e-02  
31-Oct-2017 10:00:00, 7.50e-02  
31-Oct-2017 11:00:00, 7.50e-02  
31-Oct-2017 12:00:00, 7.50e-02  
31-Oct-2017 13:00:00, 7.50e-02  
31-Oct-2017 14:00:00, 7.40e-02  
31-Oct-2017 15:00:00, 7.40e-02  
31-Oct-2017 16:00:00, 7.20e-02  
31-Oct-2017 17:00:00, 7.20e-02  
31-Oct-2017 18:00:00, 7.20e-02  
31-Oct-2017 19:00:00, 7.20e-02  
31-Oct-2017 20:00:00, 7.10e-02  
31-Oct-2017 21:00:00, 7.10e-02  
31-Oct-2017 22:00:00, 7.10e-02  
31-Oct-2017 23:00:00, 7.10e-02  
01-Nov-2017, NaN  
01-Nov-2017 01:00:00, NaN  
01-Nov-2017 02:00:00, NaN  
01-Nov-2017 03:00:00, NaN  
01-Nov-2017 04:00:00, NaN  
01-Nov-2017 05:00:00, NaN  
01-Nov-2017 06:00:00, NaN  
01-Nov-2017 07:00:00, NaN  
01-Nov-2017 08:00:00, NaN  
01-Nov-2017 09:00:00, NaN  
01-Nov-2017 10:00:00, NaN  
01-Nov-2017 11:00:00, NaN  
01-Nov-2017 12:00:00, NaN  
01-Nov-2017 13:00:00, NaN  
01-Nov-2017 14:00:00, NaN  
01-Nov-2017 15:00:00, NaN  
01-Nov-2017 16:00:00, NaN  
01-Nov-2017 17:00:00, NaN  
01-Nov-2017 18:00:00, NaN  
01-Nov-2017 19:00:00, NaN  
01-Nov-2017 20:00:00, NaN  
01-Nov-2017 21:00:00, NaN

01-Nov-2017 22:00:00, NaN  
01-Nov-2017 23:00:00, NaN  
02-Nov-2017, NaN  
02-Nov-2017 01:00:00, NaN  
02-Nov-2017 02:00:00, NaN  
02-Nov-2017 03:00:00, NaN  
02-Nov-2017 04:00:00, NaN  
02-Nov-2017 05:00:00, NaN  
02-Nov-2017 06:00:00, NaN  
02-Nov-2017 07:00:00, NaN  
02-Nov-2017 08:00:00, NaN  
02-Nov-2017 09:00:00, NaN  
02-Nov-2017 10:00:00, NaN  
02-Nov-2017 11:00:00, NaN  
02-Nov-2017 12:00:00, NaN  
02-Nov-2017 13:00:00, NaN  
02-Nov-2017 14:00:00, NaN  
02-Nov-2017 15:00:00, NaN  
02-Nov-2017 16:00:00, NaN  
02-Nov-2017 17:00:00, NaN  
02-Nov-2017 18:00:00, NaN  
02-Nov-2017 19:00:00, NaN  
02-Nov-2017 20:00:00, NaN  
02-Nov-2017 21:00:00, NaN  
02-Nov-2017 22:00:00, NaN  
02-Nov-2017 23:00:00, NaN  
03-Nov-2017, NaN  
03-Nov-2017 01:00:00, NaN  
03-Nov-2017 02:00:00, NaN  
03-Nov-2017 03:00:00, NaN  
03-Nov-2017 04:00:00, NaN  
03-Nov-2017 05:00:00, NaN  
03-Nov-2017 06:00:00, NaN  
03-Nov-2017 07:00:00, NaN  
03-Nov-2017 08:00:00, NaN  
03-Nov-2017 09:00:00, NaN  
03-Nov-2017 10:00:00, NaN  
03-Nov-2017 11:00:00, NaN  
03-Nov-2017 12:00:00, NaN  
03-Nov-2017 13:00:00, NaN  
03-Nov-2017 14:00:00, NaN  
03-Nov-2017 15:00:00, NaN  
03-Nov-2017 16:00:00, NaN  
03-Nov-2017 17:00:00, NaN  
03-Nov-2017 18:00:00, NaN  
03-Nov-2017 19:00:00, NaN  
03-Nov-2017 20:00:00, NaN  
03-Nov-2017 21:00:00, NaN  
03-Nov-2017 22:00:00, NaN  
03-Nov-2017 23:00:00, NaN  
04-Nov-2017, NaN  
04-Nov-2017 01:00:00, NaN  
04-Nov-2017 02:00:00, NaN  
04-Nov-2017 03:00:00, NaN  
04-Nov-2017 04:00:00, NaN  
04-Nov-2017 05:00:00, NaN  
04-Nov-2017 06:00:00, NaN  
04-Nov-2017 07:00:00, NaN  
04-Nov-2017 08:00:00, NaN  
04-Nov-2017 09:00:00, NaN  
04-Nov-2017 10:00:00, NaN  
04-Nov-2017 11:00:00, NaN  
04-Nov-2017 12:00:00, NaN  
04-Nov-2017 13:00:00, NaN

04-Nov-2017 14:00:00, NaN  
04-Nov-2017 15:00:00, NaN  
04-Nov-2017 16:00:00, NaN  
04-Nov-2017 17:00:00, NaN  
04-Nov-2017 18:00:00, NaN  
04-Nov-2017 19:00:00, NaN  
04-Nov-2017 20:00:00, NaN  
04-Nov-2017 21:00:00, NaN  
04-Nov-2017 22:00:00, NaN  
04-Nov-2017 23:00:00, NaN  
05-Nov-2017, NaN  
05-Nov-2017 01:00:00, NaN  
05-Nov-2017 02:00:00, NaN  
05-Nov-2017 03:00:00, NaN  
05-Nov-2017 04:00:00, NaN  
05-Nov-2017 05:00:00, NaN  
05-Nov-2017 06:00:00, NaN  
05-Nov-2017 07:00:00, NaN  
05-Nov-2017 08:00:00, NaN  
05-Nov-2017 09:00:00, NaN  
05-Nov-2017 10:00:00, NaN  
05-Nov-2017 11:00:00, NaN  
05-Nov-2017 12:00:00, NaN  
05-Nov-2017 13:00:00, NaN  
05-Nov-2017 14:00:00, NaN  
05-Nov-2017 15:00:00, NaN  
05-Nov-2017 16:00:00, NaN  
05-Nov-2017 17:00:00, NaN  
05-Nov-2017 18:00:00, NaN  
05-Nov-2017 19:00:00, NaN  
05-Nov-2017 20:00:00, NaN  
05-Nov-2017 21:00:00, NaN  
05-Nov-2017 22:00:00, NaN  
05-Nov-2017 23:00:00, NaN  
06-Nov-2017, NaN  
06-Nov-2017 01:00:00, NaN  
06-Nov-2017 02:00:00, NaN  
06-Nov-2017 03:00:00, NaN  
06-Nov-2017 04:00:00, NaN  
06-Nov-2017 05:00:00, NaN  
06-Nov-2017 06:00:00, NaN  
06-Nov-2017 07:00:00, NaN  
06-Nov-2017 08:00:00, NaN  
06-Nov-2017 09:00:00, NaN  
06-Nov-2017 10:00:00, NaN  
06-Nov-2017 11:00:00, NaN  
06-Nov-2017 12:00:00, NaN  
06-Nov-2017 13:00:00, NaN  
06-Nov-2017 14:00:00, NaN  
06-Nov-2017 15:00:00, NaN  
06-Nov-2017 16:00:00, NaN  
06-Nov-2017 17:00:00, NaN  
06-Nov-2017 18:00:00, NaN  
06-Nov-2017 19:00:00, NaN  
06-Nov-2017 20:00:00, NaN  
06-Nov-2017 21:00:00, NaN  
06-Nov-2017 22:00:00, NaN  
06-Nov-2017 23:00:00, NaN  
07-Nov-2017, NaN  
07-Nov-2017 01:00:00, NaN  
07-Nov-2017 02:00:00, NaN  
07-Nov-2017 03:00:00, NaN  
07-Nov-2017 04:00:00, NaN  
07-Nov-2017 05:00:00, NaN

07-Nov-2017 06:00:00, NaN  
07-Nov-2017 07:00:00, NaN  
07-Nov-2017 08:00:00, NaN  
07-Nov-2017 09:00:00, NaN  
07-Nov-2017 10:00:00, NaN  
07-Nov-2017 11:00:00, NaN  
07-Nov-2017 12:00:00, NaN  
07-Nov-2017 13:00:00, NaN  
07-Nov-2017 14:00:00, NaN  
07-Nov-2017 15:00:00, NaN  
07-Nov-2017 16:00:00, NaN  
07-Nov-2017 17:00:00, NaN  
07-Nov-2017 18:00:00, NaN  
07-Nov-2017 19:00:00, NaN  
07-Nov-2017 20:00:00, NaN  
07-Nov-2017 21:00:00, NaN  
07-Nov-2017 22:00:00, NaN  
07-Nov-2017 23:00:00, NaN  
08-Nov-2017, NaN  
08-Nov-2017 01:00:00, NaN  
08-Nov-2017 02:00:00, NaN  
08-Nov-2017 03:00:00, NaN  
08-Nov-2017 04:00:00, NaN  
08-Nov-2017 05:00:00, NaN  
08-Nov-2017 06:00:00, NaN  
08-Nov-2017 07:00:00, NaN  
08-Nov-2017 08:00:00, NaN  
08-Nov-2017 09:00:00, NaN  
08-Nov-2017 10:00:00, NaN  
08-Nov-2017 11:00:00, NaN  
08-Nov-2017 12:00:00, NaN  
08-Nov-2017 13:00:00, NaN  
08-Nov-2017 14:00:00, NaN  
08-Nov-2017 15:00:00, NaN  
08-Nov-2017 16:00:00, NaN  
08-Nov-2017 17:00:00, NaN  
08-Nov-2017 18:00:00, NaN  
08-Nov-2017 19:00:00, NaN  
08-Nov-2017 20:00:00, NaN  
08-Nov-2017 21:00:00, NaN  
08-Nov-2017 22:00:00, NaN  
08-Nov-2017 23:00:00, NaN  
09-Nov-2017, NaN  
09-Nov-2017 01:00:00, NaN  
09-Nov-2017 02:00:00, NaN  
09-Nov-2017 03:00:00, NaN  
09-Nov-2017 04:00:00, NaN  
09-Nov-2017 05:00:00, NaN  
09-Nov-2017 06:00:00, NaN  
09-Nov-2017 07:00:00, NaN  
09-Nov-2017 08:00:00, NaN  
09-Nov-2017 09:00:00, NaN  
09-Nov-2017 10:00:00, NaN  
09-Nov-2017 11:00:00, NaN  
09-Nov-2017 12:00:00, NaN  
09-Nov-2017 13:00:00, NaN  
09-Nov-2017 14:00:00, NaN  
09-Nov-2017 15:00:00, NaN  
09-Nov-2017 16:00:00, NaN  
09-Nov-2017 17:00:00, NaN  
09-Nov-2017 18:00:00, NaN  
09-Nov-2017 19:00:00, NaN  
09-Nov-2017 20:00:00, NaN  
09-Nov-2017 21:00:00, NaN



09-Nov-2017 22:00:00, NaN  
09-Nov-2017 23:00:00, NaN  
10-Nov-2017, NaN  
10-Nov-2017 01:00:00, NaN  
10-Nov-2017 02:00:00, NaN  
10-Nov-2017 03:00:00, NaN  
10-Nov-2017 04:00:00, NaN  
10-Nov-2017 05:00:00, NaN  
10-Nov-2017 06:00:00, NaN  
10-Nov-2017 07:00:00, NaN  
10-Nov-2017 08:00:00, NaN  
10-Nov-2017 09:00:00, NaN  
10-Nov-2017 10:00:00, NaN  
10-Nov-2017 11:00:00, NaN  
10-Nov-2017 12:00:00, NaN  
10-Nov-2017 13:00:00, NaN  
10-Nov-2017 14:00:00, NaN  
10-Nov-2017 15:00:00, NaN  
10-Nov-2017 16:00:00, NaN  
10-Nov-2017 17:00:00, NaN  
10-Nov-2017 18:00:00, NaN  
10-Nov-2017 19:00:00, NaN  
10-Nov-2017 20:00:00, NaN  
10-Nov-2017 21:00:00, NaN  
10-Nov-2017 22:00:00, NaN  
10-Nov-2017 23:00:00, NaN  
11-Nov-2017, NaN  
11-Nov-2017 01:00:00, NaN  
11-Nov-2017 02:00:00, NaN  
11-Nov-2017 03:00:00, NaN  
11-Nov-2017 04:00:00, NaN  
11-Nov-2017 05:00:00, NaN  
11-Nov-2017 06:00:00, NaN  
11-Nov-2017 07:00:00, NaN  
11-Nov-2017 08:00:00, NaN  
11-Nov-2017 09:00:00, NaN  
11-Nov-2017 10:00:00, NaN  
11-Nov-2017 11:00:00, NaN  
11-Nov-2017 12:00:00, NaN  
11-Nov-2017 13:00:00, NaN  
11-Nov-2017 14:00:00, NaN  
11-Nov-2017 15:00:00, NaN  
11-Nov-2017 16:00:00, NaN  
11-Nov-2017 17:00:00, NaN  
11-Nov-2017 18:00:00, NaN  
11-Nov-2017 19:00:00, NaN  
11-Nov-2017 20:00:00, NaN  
11-Nov-2017 21:00:00, NaN  
11-Nov-2017 22:00:00, NaN  
11-Nov-2017 23:00:00, NaN  
12-Nov-2017, NaN  
12-Nov-2017 01:00:00, NaN  
12-Nov-2017 02:00:00, NaN  
12-Nov-2017 03:00:00, NaN  
12-Nov-2017 04:00:00, NaN  
12-Nov-2017 05:00:00, NaN  
12-Nov-2017 06:00:00, NaN  
12-Nov-2017 07:00:00, NaN  
12-Nov-2017 08:00:00, NaN  
12-Nov-2017 09:00:00, NaN  
12-Nov-2017 10:00:00, NaN  
12-Nov-2017 11:00:00, NaN  
12-Nov-2017 12:00:00, NaN  
12-Nov-2017 13:00:00, NaN

12-Nov-2017 14:00:00, NaN  
12-Nov-2017 15:00:00, NaN  
12-Nov-2017 16:00:00, NaN  
12-Nov-2017 17:00:00, NaN  
12-Nov-2017 18:00:00, NaN  
12-Nov-2017 19:00:00, NaN  
12-Nov-2017 20:00:00, NaN  
12-Nov-2017 21:00:00, NaN  
12-Nov-2017 22:00:00, NaN  
12-Nov-2017 23:00:00, NaN  
13-Nov-2017, NaN  
13-Nov-2017 01:00:00, NaN  
13-Nov-2017 02:00:00, NaN  
13-Nov-2017 03:00:00, NaN  
13-Nov-2017 04:00:00, NaN  
13-Nov-2017 05:00:00, NaN  
13-Nov-2017 06:00:00, NaN  
13-Nov-2017 07:00:00, NaN  
13-Nov-2017 08:00:00, NaN  
13-Nov-2017 09:00:00, NaN  
13-Nov-2017 10:00:00, NaN  
13-Nov-2017 11:00:00, NaN  
13-Nov-2017 12:00:00, NaN  
13-Nov-2017 13:00:00, NaN  
13-Nov-2017 14:00:00, NaN  
13-Nov-2017 15:00:00, NaN  
13-Nov-2017 16:00:00, NaN  
13-Nov-2017 17:00:00, NaN  
13-Nov-2017 18:00:00, NaN  
13-Nov-2017 19:00:00, NaN  
13-Nov-2017 20:00:00, NaN  
13-Nov-2017 21:00:00, NaN  
13-Nov-2017 22:00:00, NaN  
13-Nov-2017 23:00:00, NaN  
14-Nov-2017, NaN  
14-Nov-2017 01:00:00, NaN  
14-Nov-2017 02:00:00, NaN  
14-Nov-2017 03:00:00, NaN  
14-Nov-2017 04:00:00, NaN  
14-Nov-2017 05:00:00, NaN  
14-Nov-2017 06:00:00, NaN  
14-Nov-2017 07:00:00, NaN  
14-Nov-2017 08:00:00, NaN  
14-Nov-2017 09:00:00, NaN  
14-Nov-2017 10:00:00, NaN  
14-Nov-2017 11:00:00, NaN  
14-Nov-2017 12:00:00, NaN  
14-Nov-2017 13:00:00, NaN  
14-Nov-2017 14:00:00, NaN  
14-Nov-2017 15:00:00, NaN  
14-Nov-2017 16:00:00, NaN  
14-Nov-2017 17:00:00, NaN  
14-Nov-2017 18:00:00, NaN  
14-Nov-2017 19:00:00, NaN  
14-Nov-2017 20:00:00, NaN  
14-Nov-2017 21:00:00, NaN  
14-Nov-2017 22:00:00, NaN  
14-Nov-2017 23:00:00, NaN  
15-Nov-2017, NaN  
15-Nov-2017 01:00:00, NaN  
15-Nov-2017 02:00:00, NaN  
15-Nov-2017 03:00:00, NaN  
15-Nov-2017 04:00:00, NaN  
15-Nov-2017 05:00:00, NaN

15-Nov-2017 06:00:00, NaN  
15-Nov-2017 07:00:00, NaN  
15-Nov-2017 08:00:00, NaN  
15-Nov-2017 09:00:00, NaN  
15-Nov-2017 10:00:00, NaN  
15-Nov-2017 11:00:00, NaN  
15-Nov-2017 12:00:00, NaN  
15-Nov-2017 13:00:00, NaN  
15-Nov-2017 14:00:00, NaN  
15-Nov-2017 15:00:00, NaN  
15-Nov-2017 16:00:00, NaN  
15-Nov-2017 17:00:00, NaN  
15-Nov-2017 18:00:00, NaN  
15-Nov-2017 19:00:00, NaN  
15-Nov-2017 20:00:00, NaN  
15-Nov-2017 21:00:00, NaN  
15-Nov-2017 22:00:00, NaN  
15-Nov-2017 23:00:00, NaN  
16-Nov-2017, NaN  
16-Nov-2017 01:00:00, NaN  
16-Nov-2017 02:00:00, NaN  
16-Nov-2017 03:00:00, NaN  
16-Nov-2017 04:00:00, NaN  
16-Nov-2017 05:00:00, NaN  
16-Nov-2017 06:00:00, NaN  
16-Nov-2017 07:00:00, NaN  
16-Nov-2017 08:00:00, NaN  
16-Nov-2017 09:00:00, NaN  
16-Nov-2017 10:00:00, NaN  
16-Nov-2017 11:00:00, NaN  
16-Nov-2017 12:00:00, NaN  
16-Nov-2017 13:00:00, NaN  
16-Nov-2017 14:00:00, NaN  
16-Nov-2017 15:00:00, NaN  
16-Nov-2017 16:00:00, NaN  
16-Nov-2017 17:00:00, NaN  
16-Nov-2017 18:00:00, NaN  
16-Nov-2017 19:00:00, NaN  
16-Nov-2017 20:00:00, NaN  
16-Nov-2017 21:00:00, NaN  
16-Nov-2017 22:00:00, NaN  
16-Nov-2017 23:00:00, NaN  
17-Nov-2017, NaN  
17-Nov-2017 01:00:00, NaN  
17-Nov-2017 02:00:00, NaN  
17-Nov-2017 03:00:00, NaN  
17-Nov-2017 04:00:00, NaN  
17-Nov-2017 05:00:00, NaN  
17-Nov-2017 06:00:00, NaN  
17-Nov-2017 07:00:00, NaN  
17-Nov-2017 08:00:00, NaN  
17-Nov-2017 09:00:00, NaN  
17-Nov-2017 10:00:00, NaN  
17-Nov-2017 11:00:00, NaN  
17-Nov-2017 12:00:00, NaN  
17-Nov-2017 13:00:00, NaN  
17-Nov-2017 14:00:00, NaN  
17-Nov-2017 15:00:00, NaN  
17-Nov-2017 16:00:00, NaN  
17-Nov-2017 17:00:00, NaN  
17-Nov-2017 18:00:00, NaN  
17-Nov-2017 19:00:00, NaN  
17-Nov-2017 20:00:00, NaN  
17-Nov-2017 21:00:00, NaN

17-Nov-2017 22:00:00, NaN  
17-Nov-2017 23:00:00, NaN  
18-Nov-2017, NaN  
18-Nov-2017 01:00:00, NaN  
18-Nov-2017 02:00:00, NaN  
18-Nov-2017 03:00:00, NaN  
18-Nov-2017 04:00:00, NaN  
18-Nov-2017 05:00:00, NaN  
18-Nov-2017 06:00:00, NaN  
18-Nov-2017 07:00:00, NaN  
18-Nov-2017 08:00:00, NaN  
18-Nov-2017 09:00:00, NaN  
18-Nov-2017 10:00:00, NaN  
18-Nov-2017 11:00:00, NaN  
18-Nov-2017 12:00:00, NaN  
18-Nov-2017 13:00:00, NaN  
18-Nov-2017 14:00:00, NaN  
18-Nov-2017 15:00:00, NaN  
18-Nov-2017 16:00:00, NaN  
18-Nov-2017 17:00:00, NaN  
18-Nov-2017 18:00:00, NaN  
18-Nov-2017 19:00:00, NaN  
18-Nov-2017 20:00:00, NaN  
18-Nov-2017 21:00:00, NaN  
18-Nov-2017 22:00:00, NaN  
18-Nov-2017 23:00:00, NaN  
19-Nov-2017, NaN  
19-Nov-2017 01:00:00, NaN  
19-Nov-2017 02:00:00, NaN  
19-Nov-2017 03:00:00, NaN  
19-Nov-2017 04:00:00, NaN  
19-Nov-2017 05:00:00, NaN  
19-Nov-2017 06:00:00, NaN  
19-Nov-2017 07:00:00, NaN  
19-Nov-2017 08:00:00, NaN  
19-Nov-2017 09:00:00, NaN  
19-Nov-2017 10:00:00, NaN  
19-Nov-2017 11:00:00, NaN  
19-Nov-2017 12:00:00, NaN  
19-Nov-2017 13:00:00, NaN  
19-Nov-2017 14:00:00, NaN  
19-Nov-2017 15:00:00, NaN  
19-Nov-2017 16:00:00, NaN  
19-Nov-2017 17:00:00, NaN  
19-Nov-2017 18:00:00, NaN  
19-Nov-2017 19:00:00, NaN  
19-Nov-2017 20:00:00, NaN  
19-Nov-2017 21:00:00, NaN  
19-Nov-2017 22:00:00, NaN  
19-Nov-2017 23:00:00, NaN  
20-Nov-2017, NaN  
20-Nov-2017 01:00:00, NaN  
20-Nov-2017 02:00:00, NaN  
20-Nov-2017 03:00:00, NaN  
20-Nov-2017 04:00:00, NaN  
20-Nov-2017 05:00:00, NaN  
20-Nov-2017 06:00:00, NaN  
20-Nov-2017 07:00:00, NaN  
20-Nov-2017 08:00:00, NaN  
20-Nov-2017 09:00:00, NaN  
20-Nov-2017 10:00:00, NaN  
20-Nov-2017 11:00:00, NaN  
20-Nov-2017 12:00:00, NaN  
20-Nov-2017 13:00:00, NaN

20-Nov-2017 14:00:00, NaN  
20-Nov-2017 15:00:00, NaN  
20-Nov-2017 16:00:00, NaN  
20-Nov-2017 17:00:00, NaN  
20-Nov-2017 18:00:00, NaN  
20-Nov-2017 19:00:00, NaN  
20-Nov-2017 20:00:00, NaN  
20-Nov-2017 21:00:00, NaN  
20-Nov-2017 22:00:00, NaN  
20-Nov-2017 23:00:00, NaN  
21-Nov-2017, NaN  
21-Nov-2017 01:00:00, NaN  
21-Nov-2017 02:00:00, NaN  
21-Nov-2017 03:00:00, NaN  
21-Nov-2017 04:00:00, NaN  
21-Nov-2017 05:00:00, NaN  
21-Nov-2017 06:00:00, NaN  
21-Nov-2017 07:00:00, NaN  
21-Nov-2017 08:00:00, NaN  
21-Nov-2017 09:00:00, NaN  
21-Nov-2017 10:00:00, NaN  
21-Nov-2017 11:00:00, NaN  
21-Nov-2017 12:00:00, NaN  
21-Nov-2017 13:00:00, NaN  
21-Nov-2017 14:00:00, NaN  
21-Nov-2017 15:00:00, NaN  
21-Nov-2017 16:00:00, NaN  
21-Nov-2017 17:00:00, NaN  
21-Nov-2017 18:00:00, NaN  
21-Nov-2017 19:00:00, NaN  
21-Nov-2017 20:00:00, NaN  
21-Nov-2017 21:00:00, NaN  
21-Nov-2017 22:00:00, NaN  
21-Nov-2017 23:00:00, NaN  
22-Nov-2017, NaN  
22-Nov-2017 01:00:00, NaN  
22-Nov-2017 02:00:00, NaN  
22-Nov-2017 03:00:00, NaN  
22-Nov-2017 04:00:00, NaN  
22-Nov-2017 05:00:00, NaN  
22-Nov-2017 06:00:00, NaN  
22-Nov-2017 07:00:00, NaN  
22-Nov-2017 08:00:00, NaN  
22-Nov-2017 09:00:00, NaN  
22-Nov-2017 10:00:00, NaN  
22-Nov-2017 11:00:00, NaN  
22-Nov-2017 12:00:00, NaN  
22-Nov-2017 13:00:00, NaN  
22-Nov-2017 14:00:00, NaN  
22-Nov-2017 15:00:00, NaN  
22-Nov-2017 16:00:00, NaN  
22-Nov-2017 17:00:00, NaN  
22-Nov-2017 18:00:00, NaN  
22-Nov-2017 19:00:00, NaN  
22-Nov-2017 20:00:00, NaN  
22-Nov-2017 21:00:00, NaN  
22-Nov-2017 22:00:00, NaN  
22-Nov-2017 23:00:00, NaN  
23-Nov-2017, NaN  
23-Nov-2017 01:00:00, NaN  
23-Nov-2017 02:00:00, NaN  
23-Nov-2017 03:00:00, NaN  
23-Nov-2017 04:00:00, NaN  
23-Nov-2017 05:00:00, NaN

|              |           |     |
|--------------|-----------|-----|
| 23-Nov-2017  | 06:00:00, | NaN |
| 23-Nov-2017  | 07:00:00, | NaN |
| 23-Nov-2017  | 08:00:00, | NaN |
| 23-Nov-2017  | 09:00:00, | NaN |
| 23-Nov-2017  | 10:00:00, | NaN |
| 23-Nov-2017  | 11:00:00, | NaN |
| 23-Nov-2017  | 12:00:00, | NaN |
| 23-Nov-2017  | 13:00:00, | NaN |
| 23-Nov-2017  | 14:00:00, | NaN |
| 23-Nov-2017  | 15:00:00, | NaN |
| 23-Nov-2017  | 16:00:00, | NaN |
| 23-Nov-2017  | 17:00:00, | NaN |
| 23-Nov-2017  | 18:00:00, | NaN |
| 23-Nov-2017  | 19:00:00, | NaN |
| 23-Nov-2017  | 20:00:00, | NaN |
| 23-Nov-2017  | 21:00:00, | NaN |
| 23-Nov-2017  | 22:00:00, | NaN |
| 23-Nov-2017  | 23:00:00, | NaN |
| 24-Nov-2017, | NaN       |     |
| 24-Nov-2017  | 01:00:00, | NaN |
| 24-Nov-2017  | 02:00:00, | NaN |
| 24-Nov-2017  | 03:00:00, | NaN |
| 24-Nov-2017  | 04:00:00, | NaN |
| 24-Nov-2017  | 05:00:00, | NaN |
| 24-Nov-2017  | 06:00:00, | NaN |
| 24-Nov-2017  | 07:00:00, | NaN |
| 24-Nov-2017  | 08:00:00, | NaN |
| 24-Nov-2017  | 09:00:00, | NaN |
| 24-Nov-2017  | 10:00:00, | NaN |
| 24-Nov-2017  | 11:00:00, | NaN |
| 24-Nov-2017  | 12:00:00, | NaN |
| 24-Nov-2017  | 13:00:00, | NaN |
| 24-Nov-2017  | 14:00:00, | NaN |
| 24-Nov-2017  | 15:00:00, | NaN |
| 24-Nov-2017  | 16:00:00, | NaN |
| 24-Nov-2017  | 17:00:00, | NaN |
| 24-Nov-2017  | 18:00:00, | NaN |
| 24-Nov-2017  | 19:00:00, | NaN |
| 24-Nov-2017  | 20:00:00, | NaN |
| 24-Nov-2017  | 21:00:00, | NaN |
| 24-Nov-2017  | 22:00:00, | NaN |
| 24-Nov-2017  | 23:00:00, | NaN |
| 25-Nov-2017, | NaN       |     |
| 25-Nov-2017  | 01:00:00, | NaN |
| 25-Nov-2017  | 02:00:00, | NaN |
| 25-Nov-2017  | 03:00:00, | NaN |
| 25-Nov-2017  | 04:00:00, | NaN |
| 25-Nov-2017  | 05:00:00, | NaN |
| 25-Nov-2017  | 06:00:00, | NaN |
| 25-Nov-2017  | 07:00:00, | NaN |
| 25-Nov-2017  | 08:00:00, | NaN |
| 25-Nov-2017  | 09:00:00, | NaN |
| 25-Nov-2017  | 10:00:00, | NaN |
| 25-Nov-2017  | 11:00:00, | NaN |
| 25-Nov-2017  | 12:00:00, | NaN |
| 25-Nov-2017  | 13:00:00, | NaN |
| 25-Nov-2017  | 14:00:00, | NaN |
| 25-Nov-2017  | 15:00:00, | NaN |
| 25-Nov-2017  | 16:00:00, | NaN |
| 25-Nov-2017  | 17:00:00, | NaN |
| 25-Nov-2017  | 18:00:00, | NaN |
| 25-Nov-2017  | 19:00:00, | NaN |
| 25-Nov-2017  | 20:00:00, | NaN |
| 25-Nov-2017  | 21:00:00, | NaN |

25-Nov-2017 22:00:00, NaN  
25-Nov-2017 23:00:00, NaN  
26-Nov-2017, NaN  
26-Nov-2017 01:00:00, NaN  
26-Nov-2017 02:00:00, NaN  
26-Nov-2017 03:00:00, NaN  
26-Nov-2017 04:00:00, NaN  
26-Nov-2017 05:00:00, NaN  
26-Nov-2017 06:00:00, NaN  
26-Nov-2017 07:00:00, NaN  
26-Nov-2017 08:00:00, NaN  
26-Nov-2017 09:00:00, NaN  
26-Nov-2017 10:00:00, NaN  
26-Nov-2017 11:00:00, NaN  
26-Nov-2017 12:00:00, NaN  
26-Nov-2017 13:00:00, NaN  
26-Nov-2017 14:00:00, NaN  
26-Nov-2017 15:00:00, NaN  
26-Nov-2017 16:00:00, NaN  
26-Nov-2017 17:00:00, NaN  
26-Nov-2017 18:00:00, NaN  
26-Nov-2017 19:00:00, NaN  
26-Nov-2017 20:00:00, NaN  
26-Nov-2017 21:00:00, NaN  
26-Nov-2017 22:00:00, NaN  
26-Nov-2017 23:00:00, NaN  
27-Nov-2017, NaN  
27-Nov-2017 01:00:00, NaN  
27-Nov-2017 02:00:00, NaN  
27-Nov-2017 03:00:00, NaN  
27-Nov-2017 04:00:00, NaN  
27-Nov-2017 05:00:00, NaN  
27-Nov-2017 06:00:00, NaN  
27-Nov-2017 07:00:00, NaN  
27-Nov-2017 08:00:00, NaN  
27-Nov-2017 09:00:00, NaN  
27-Nov-2017 10:00:00, NaN  
27-Nov-2017 11:00:00, NaN  
27-Nov-2017 12:00:00, NaN  
27-Nov-2017 13:00:00, NaN  
27-Nov-2017 14:00:00, NaN  
27-Nov-2017 15:00:00, NaN  
27-Nov-2017 16:00:00, NaN  
27-Nov-2017 17:00:00, NaN  
27-Nov-2017 18:00:00, NaN  
27-Nov-2017 19:00:00, NaN  
27-Nov-2017 20:00:00, NaN  
27-Nov-2017 21:00:00, NaN  
27-Nov-2017 22:00:00, NaN  
27-Nov-2017 23:00:00, NaN  
28-Nov-2017, NaN  
28-Nov-2017 01:00:00, NaN  
28-Nov-2017 02:00:00, NaN  
28-Nov-2017 03:00:00, NaN  
28-Nov-2017 04:00:00, NaN  
28-Nov-2017 05:00:00, NaN  
28-Nov-2017 06:00:00, NaN  
28-Nov-2017 07:00:00, NaN  
28-Nov-2017 08:00:00, NaN  
28-Nov-2017 09:00:00, NaN  
28-Nov-2017 10:00:00, NaN  
28-Nov-2017 11:00:00, NaN  
28-Nov-2017 12:00:00, NaN  
28-Nov-2017 13:00:00, NaN

28-Nov-2017 14:00:00, NaN  
28-Nov-2017 15:00:00, NaN  
28-Nov-2017 16:00:00, NaN  
28-Nov-2017 17:00:00, NaN  
28-Nov-2017 18:00:00, NaN  
28-Nov-2017 19:00:00, NaN  
28-Nov-2017 20:00:00, NaN  
28-Nov-2017 21:00:00, NaN  
28-Nov-2017 22:00:00, NaN  
28-Nov-2017 23:00:00, NaN  
29-Nov-2017, NaN  
29-Nov-2017 01:00:00, NaN  
29-Nov-2017 02:00:00, NaN  
29-Nov-2017 03:00:00, NaN  
29-Nov-2017 04:00:00, NaN  
29-Nov-2017 05:00:00, NaN  
29-Nov-2017 06:00:00, NaN  
29-Nov-2017 07:00:00, NaN  
29-Nov-2017 08:00:00, NaN  
29-Nov-2017 09:00:00, NaN  
29-Nov-2017 10:00:00, NaN  
29-Nov-2017 11:00:00, NaN  
29-Nov-2017 12:00:00, NaN  
29-Nov-2017 13:00:00, NaN  
29-Nov-2017 14:00:00, NaN  
29-Nov-2017 15:00:00, NaN  
29-Nov-2017 16:00:00, NaN  
29-Nov-2017 17:00:00, NaN  
29-Nov-2017 18:00:00, NaN  
29-Nov-2017 19:00:00, NaN  
29-Nov-2017 20:00:00, NaN  
29-Nov-2017 21:00:00, NaN  
29-Nov-2017 22:00:00, NaN  
29-Nov-2017 23:00:00, NaN  
30-Nov-2017, NaN  
30-Nov-2017 01:00:00, NaN  
30-Nov-2017 02:00:00, NaN  
30-Nov-2017 03:00:00, NaN  
30-Nov-2017 04:00:00, NaN  
30-Nov-2017 05:00:00, NaN  
30-Nov-2017 06:00:00, NaN  
30-Nov-2017 07:00:00, NaN  
30-Nov-2017 08:00:00, NaN  
30-Nov-2017 09:00:00, NaN  
30-Nov-2017 10:00:00, NaN  
30-Nov-2017 11:00:00, NaN  
30-Nov-2017 12:00:00, NaN  
30-Nov-2017 13:00:00, NaN  
30-Nov-2017 14:00:00, NaN  
30-Nov-2017 15:00:00, NaN  
30-Nov-2017 16:00:00, NaN  
30-Nov-2017 17:00:00, NaN  
30-Nov-2017 18:00:00, NaN  
30-Nov-2017 19:00:00, NaN  
30-Nov-2017 20:00:00, NaN  
30-Nov-2017 21:00:00, NaN  
30-Nov-2017 22:00:00, NaN  
30-Nov-2017 23:00:00, NaN  
01-Dec-2017, NaN  
01-Dec-2017 01:00:00, NaN  
01-Dec-2017 02:00:00, NaN  
01-Dec-2017 03:00:00, NaN  
01-Dec-2017 04:00:00, NaN  
01-Dec-2017 05:00:00, NaN



01-Dec-2017 06:00:00, NaN  
01-Dec-2017 07:00:00, NaN  
01-Dec-2017 08:00:00, NaN  
01-Dec-2017 09:00:00, NaN  
01-Dec-2017 10:00:00, NaN  
01-Dec-2017 11:00:00, NaN  
01-Dec-2017 12:00:00, NaN  
01-Dec-2017 13:00:00, NaN  
01-Dec-2017 14:00:00, NaN  
01-Dec-2017 15:00:00, NaN  
01-Dec-2017 16:00:00, NaN  
01-Dec-2017 17:00:00, NaN  
01-Dec-2017 18:00:00, NaN  
01-Dec-2017 19:00:00, NaN  
01-Dec-2017 20:00:00, NaN  
01-Dec-2017 21:00:00, NaN  
01-Dec-2017 22:00:00, NaN  
01-Dec-2017 23:00:00, NaN  
02-Dec-2017, NaN  
02-Dec-2017 01:00:00, NaN  
02-Dec-2017 02:00:00, NaN  
02-Dec-2017 03:00:00, NaN  
02-Dec-2017 04:00:00, NaN  
02-Dec-2017 05:00:00, NaN  
02-Dec-2017 06:00:00, NaN  
02-Dec-2017 07:00:00, NaN  
02-Dec-2017 08:00:00, NaN  
02-Dec-2017 09:00:00, NaN  
02-Dec-2017 10:00:00, NaN  
02-Dec-2017 11:00:00, NaN  
02-Dec-2017 12:00:00, NaN  
02-Dec-2017 13:00:00, NaN  
02-Dec-2017 14:00:00, NaN  
02-Dec-2017 15:00:00, NaN  
02-Dec-2017 16:00:00, NaN  
02-Dec-2017 17:00:00, NaN  
02-Dec-2017 18:00:00, NaN  
02-Dec-2017 19:00:00, NaN  
02-Dec-2017 20:00:00, NaN  
02-Dec-2017 21:00:00, NaN  
02-Dec-2017 22:00:00, NaN  
02-Dec-2017 23:00:00, NaN  
03-Dec-2017, NaN  
03-Dec-2017 01:00:00, NaN  
03-Dec-2017 02:00:00, NaN  
03-Dec-2017 03:00:00, NaN  
03-Dec-2017 04:00:00, NaN  
03-Dec-2017 05:00:00, NaN  
03-Dec-2017 06:00:00, NaN  
03-Dec-2017 07:00:00, NaN  
03-Dec-2017 08:00:00, NaN  
03-Dec-2017 09:00:00, NaN  
03-Dec-2017 10:00:00, NaN  
03-Dec-2017 11:00:00, NaN  
03-Dec-2017 12:00:00, NaN  
03-Dec-2017 13:00:00, NaN  
03-Dec-2017 14:00:00, NaN  
03-Dec-2017 15:00:00, NaN  
03-Dec-2017 16:00:00, NaN  
03-Dec-2017 17:00:00, NaN  
03-Dec-2017 18:00:00, NaN  
03-Dec-2017 19:00:00, NaN  
03-Dec-2017 20:00:00, NaN  
03-Dec-2017 21:00:00, NaN

03-Dec-2017 22:00:00, NaN  
03-Dec-2017 23:00:00, NaN  
04-Dec-2017, NaN  
04-Dec-2017 01:00:00, NaN  
04-Dec-2017 02:00:00, NaN  
04-Dec-2017 03:00:00, NaN  
04-Dec-2017 04:00:00, NaN  
04-Dec-2017 05:00:00, NaN  
04-Dec-2017 06:00:00, NaN  
04-Dec-2017 07:00:00, NaN  
04-Dec-2017 08:00:00, NaN  
04-Dec-2017 09:00:00, NaN  
04-Dec-2017 10:00:00, NaN  
04-Dec-2017 11:00:00, NaN  
04-Dec-2017 12:00:00, NaN  
04-Dec-2017 13:00:00, NaN  
04-Dec-2017 14:00:00, NaN  
04-Dec-2017 15:00:00, NaN  
04-Dec-2017 16:00:00, NaN  
04-Dec-2017 17:00:00, NaN  
04-Dec-2017 18:00:00, NaN  
04-Dec-2017 19:00:00, NaN  
04-Dec-2017 20:00:00, NaN  
04-Dec-2017 21:00:00, NaN  
04-Dec-2017 22:00:00, NaN  
04-Dec-2017 23:00:00, NaN  
05-Dec-2017, NaN  
05-Dec-2017 01:00:00, NaN  
05-Dec-2017 02:00:00, NaN  
05-Dec-2017 03:00:00, NaN  
05-Dec-2017 04:00:00, NaN  
05-Dec-2017 05:00:00, NaN  
05-Dec-2017 06:00:00, NaN  
05-Dec-2017 07:00:00, NaN  
05-Dec-2017 08:00:00, NaN  
05-Dec-2017 09:00:00, NaN  
05-Dec-2017 10:00:00, NaN  
05-Dec-2017 11:00:00, NaN  
05-Dec-2017 12:00:00, NaN  
05-Dec-2017 13:00:00, NaN  
05-Dec-2017 14:00:00, NaN  
05-Dec-2017 15:00:00, NaN  
05-Dec-2017 16:00:00, NaN  
05-Dec-2017 17:00:00, NaN  
05-Dec-2017 18:00:00, NaN  
05-Dec-2017 19:00:00, NaN  
05-Dec-2017 20:00:00, NaN  
05-Dec-2017 21:00:00, NaN  
05-Dec-2017 22:00:00, NaN  
05-Dec-2017 23:00:00, NaN  
06-Dec-2017, NaN  
06-Dec-2017 01:00:00, NaN  
06-Dec-2017 02:00:00, NaN  
06-Dec-2017 03:00:00, NaN  
06-Dec-2017 04:00:00, NaN  
06-Dec-2017 05:00:00, NaN  
06-Dec-2017 06:00:00, NaN  
06-Dec-2017 07:00:00, NaN  
06-Dec-2017 08:00:00, NaN  
06-Dec-2017 09:00:00, NaN  
06-Dec-2017 10:00:00, NaN  
06-Dec-2017 11:00:00, NaN  
06-Dec-2017 12:00:00, NaN  
06-Dec-2017 13:00:00, NaN

06-Dec-2017 14:00:00, NaN  
06-Dec-2017 15:00:00, NaN  
06-Dec-2017 16:00:00, NaN  
06-Dec-2017 17:00:00, NaN  
06-Dec-2017 18:00:00, NaN  
06-Dec-2017 19:00:00, NaN  
06-Dec-2017 20:00:00, NaN  
06-Dec-2017 21:00:00, NaN  
06-Dec-2017 22:00:00, NaN  
06-Dec-2017 23:00:00, NaN  
07-Dec-2017, NaN  
07-Dec-2017 01:00:00, NaN  
07-Dec-2017 02:00:00, NaN  
07-Dec-2017 03:00:00, NaN  
07-Dec-2017 04:00:00, NaN  
07-Dec-2017 05:00:00, NaN  
07-Dec-2017 06:00:00, NaN  
07-Dec-2017 07:00:00, NaN  
07-Dec-2017 08:00:00, NaN  
07-Dec-2017 09:00:00, NaN  
07-Dec-2017 10:00:00, NaN  
07-Dec-2017 11:00:00, NaN  
07-Dec-2017 12:00:00, NaN  
07-Dec-2017 13:00:00, NaN  
07-Dec-2017 14:00:00, NaN  
07-Dec-2017 15:00:00, NaN  
07-Dec-2017 16:00:00, NaN  
07-Dec-2017 17:00:00, NaN  
07-Dec-2017 18:00:00, NaN  
07-Dec-2017 19:00:00, NaN  
07-Dec-2017 20:00:00, NaN  
07-Dec-2017 21:00:00, NaN  
07-Dec-2017 22:00:00, NaN  
07-Dec-2017 23:00:00, NaN  
08-Dec-2017, NaN  
08-Dec-2017 01:00:00, NaN  
08-Dec-2017 02:00:00, NaN  
08-Dec-2017 03:00:00, NaN  
08-Dec-2017 04:00:00, NaN  
08-Dec-2017 05:00:00, NaN  
08-Dec-2017 06:00:00, NaN  
08-Dec-2017 07:00:00, NaN  
08-Dec-2017 08:00:00, NaN  
08-Dec-2017 09:00:00, NaN  
08-Dec-2017 10:00:00, NaN  
08-Dec-2017 11:00:00, NaN  
08-Dec-2017 12:00:00, NaN  
08-Dec-2017 13:00:00, NaN  
08-Dec-2017 14:00:00, NaN  
08-Dec-2017 15:00:00, NaN  
08-Dec-2017 16:00:00, NaN  
08-Dec-2017 17:00:00, NaN  
08-Dec-2017 18:00:00, NaN  
08-Dec-2017 19:00:00, NaN  
08-Dec-2017 20:00:00, NaN  
08-Dec-2017 21:00:00, NaN  
08-Dec-2017 22:00:00, NaN  
08-Dec-2017 23:00:00, NaN  
09-Dec-2017, NaN  
09-Dec-2017 01:00:00, NaN  
09-Dec-2017 02:00:00, NaN  
09-Dec-2017 03:00:00, NaN  
09-Dec-2017 04:00:00, NaN  
09-Dec-2017 05:00:00, NaN

|              |           |     |
|--------------|-----------|-----|
| 09-Dec-2017  | 06:00:00, | NaN |
| 09-Dec-2017  | 07:00:00, | NaN |
| 09-Dec-2017  | 08:00:00, | NaN |
| 09-Dec-2017  | 09:00:00, | NaN |
| 09-Dec-2017  | 10:00:00, | NaN |
| 09-Dec-2017  | 11:00:00, | NaN |
| 09-Dec-2017  | 12:00:00, | NaN |
| 09-Dec-2017  | 13:00:00, | NaN |
| 09-Dec-2017  | 14:00:00, | NaN |
| 09-Dec-2017  | 15:00:00, | NaN |
| 09-Dec-2017  | 16:00:00, | NaN |
| 09-Dec-2017  | 17:00:00, | NaN |
| 09-Dec-2017  | 18:00:00, | NaN |
| 09-Dec-2017  | 19:00:00, | NaN |
| 09-Dec-2017  | 20:00:00, | NaN |
| 09-Dec-2017  | 21:00:00, | NaN |
| 09-Dec-2017  | 22:00:00, | NaN |
| 09-Dec-2017  | 23:00:00, | NaN |
| 10-Dec-2017, | NaN       |     |
| 10-Dec-2017  | 01:00:00, | NaN |
| 10-Dec-2017  | 02:00:00, | NaN |
| 10-Dec-2017  | 03:00:00, | NaN |
| 10-Dec-2017  | 04:00:00, | NaN |
| 10-Dec-2017  | 05:00:00, | NaN |
| 10-Dec-2017  | 06:00:00, | NaN |
| 10-Dec-2017  | 07:00:00, | NaN |
| 10-Dec-2017  | 08:00:00, | NaN |
| 10-Dec-2017  | 09:00:00, | NaN |
| 10-Dec-2017  | 10:00:00, | NaN |
| 10-Dec-2017  | 11:00:00, | NaN |
| 10-Dec-2017  | 12:00:00, | NaN |
| 10-Dec-2017  | 13:00:00, | NaN |
| 10-Dec-2017  | 14:00:00, | NaN |
| 10-Dec-2017  | 15:00:00, | NaN |
| 10-Dec-2017  | 16:00:00, | NaN |
| 10-Dec-2017  | 17:00:00, | NaN |
| 10-Dec-2017  | 18:00:00, | NaN |
| 10-Dec-2017  | 19:00:00, | NaN |
| 10-Dec-2017  | 20:00:00, | NaN |
| 10-Dec-2017  | 21:00:00, | NaN |
| 10-Dec-2017  | 22:00:00, | NaN |
| 10-Dec-2017  | 23:00:00, | NaN |
| 11-Dec-2017, | NaN       |     |
| 11-Dec-2017  | 01:00:00, | NaN |
| 11-Dec-2017  | 02:00:00, | NaN |
| 11-Dec-2017  | 03:00:00, | NaN |
| 11-Dec-2017  | 04:00:00, | NaN |
| 11-Dec-2017  | 05:00:00, | NaN |
| 11-Dec-2017  | 06:00:00, | NaN |
| 11-Dec-2017  | 07:00:00, | NaN |
| 11-Dec-2017  | 08:00:00, | NaN |
| 11-Dec-2017  | 09:00:00, | NaN |
| 11-Dec-2017  | 10:00:00, | NaN |
| 11-Dec-2017  | 11:00:00, | NaN |
| 11-Dec-2017  | 12:00:00, | NaN |
| 11-Dec-2017  | 13:00:00, | NaN |
| 11-Dec-2017  | 14:00:00, | NaN |
| 11-Dec-2017  | 15:00:00, | NaN |
| 11-Dec-2017  | 16:00:00, | NaN |
| 11-Dec-2017  | 17:00:00, | NaN |
| 11-Dec-2017  | 18:00:00, | NaN |
| 11-Dec-2017  | 19:00:00, | NaN |
| 11-Dec-2017  | 20:00:00, | NaN |
| 11-Dec-2017  | 21:00:00, | NaN |

11-Dec-2017 22:00:00, NaN  
11-Dec-2017 23:00:00, NaN  
12-Dec-2017, NaN  
12-Dec-2017 01:00:00, NaN  
12-Dec-2017 02:00:00, NaN  
12-Dec-2017 03:00:00, NaN  
12-Dec-2017 04:00:00, NaN  
12-Dec-2017 05:00:00, NaN  
12-Dec-2017 06:00:00, NaN  
12-Dec-2017 07:00:00, NaN  
12-Dec-2017 08:00:00, NaN  
12-Dec-2017 09:00:00, NaN  
12-Dec-2017 10:00:00, NaN  
12-Dec-2017 11:00:00, NaN  
12-Dec-2017 12:00:00, NaN  
12-Dec-2017 13:00:00, NaN  
12-Dec-2017 14:00:00, NaN  
12-Dec-2017 15:00:00, NaN  
12-Dec-2017 16:00:00, NaN  
12-Dec-2017 17:00:00, NaN  
12-Dec-2017 18:00:00, NaN  
12-Dec-2017 19:00:00, NaN  
12-Dec-2017 20:00:00, NaN  
12-Dec-2017 21:00:00, NaN  
12-Dec-2017 22:00:00, NaN  
12-Dec-2017 23:00:00, NaN  
13-Dec-2017, NaN  
13-Dec-2017 01:00:00, NaN  
13-Dec-2017 02:00:00, NaN  
13-Dec-2017 03:00:00, NaN  
13-Dec-2017 04:00:00, NaN  
13-Dec-2017 05:00:00, NaN  
13-Dec-2017 06:00:00, NaN  
13-Dec-2017 07:00:00, NaN  
13-Dec-2017 08:00:00, NaN  
13-Dec-2017 09:00:00, NaN  
13-Dec-2017 10:00:00, NaN  
13-Dec-2017 11:00:00, NaN  
13-Dec-2017 12:00:00, NaN  
13-Dec-2017 13:00:00, NaN  
13-Dec-2017 14:00:00, NaN  
13-Dec-2017 15:00:00, NaN  
13-Dec-2017 16:00:00, NaN  
13-Dec-2017 17:00:00, NaN  
13-Dec-2017 18:00:00, NaN  
13-Dec-2017 19:00:00, NaN  
13-Dec-2017 20:00:00, NaN  
13-Dec-2017 21:00:00, NaN  
13-Dec-2017 22:00:00, NaN  
13-Dec-2017 23:00:00, NaN  
14-Dec-2017, NaN  
14-Dec-2017 01:00:00, NaN  
14-Dec-2017 02:00:00, NaN  
14-Dec-2017 03:00:00, NaN  
14-Dec-2017 04:00:00, NaN  
14-Dec-2017 05:00:00, NaN  
14-Dec-2017 06:00:00, NaN  
14-Dec-2017 07:00:00, NaN  
14-Dec-2017 08:00:00, NaN  
14-Dec-2017 09:00:00, NaN  
14-Dec-2017 10:00:00, NaN  
14-Dec-2017 11:00:00, NaN  
14-Dec-2017 12:00:00, NaN  
14-Dec-2017 13:00:00, NaN

14-Dec-2017 14:00:00, NaN  
14-Dec-2017 15:00:00, NaN  
14-Dec-2017 16:00:00, NaN  
14-Dec-2017 17:00:00, NaN  
14-Dec-2017 18:00:00, NaN  
14-Dec-2017 19:00:00, NaN  
14-Dec-2017 20:00:00, NaN  
14-Dec-2017 21:00:00, NaN  
14-Dec-2017 22:00:00, NaN  
14-Dec-2017 23:00:00, NaN  
15-Dec-2017, NaN  
15-Dec-2017 01:00:00, NaN  
15-Dec-2017 02:00:00, NaN  
15-Dec-2017 03:00:00, NaN  
15-Dec-2017 04:00:00, NaN  
15-Dec-2017 05:00:00, NaN  
15-Dec-2017 06:00:00, NaN  
15-Dec-2017 07:00:00, NaN  
15-Dec-2017 08:00:00, NaN  
15-Dec-2017 09:00:00, NaN  
15-Dec-2017 10:00:00, NaN  
15-Dec-2017 11:00:00, NaN  
15-Dec-2017 12:00:00, NaN  
15-Dec-2017 13:00:00, NaN  
15-Dec-2017 14:00:00, NaN  
15-Dec-2017 15:00:00, NaN  
15-Dec-2017 16:00:00, NaN  
15-Dec-2017 17:00:00, NaN  
15-Dec-2017 18:00:00, NaN  
15-Dec-2017 19:00:00, NaN  
15-Dec-2017 20:00:00, NaN  
15-Dec-2017 21:00:00, NaN  
15-Dec-2017 22:00:00, NaN  
15-Dec-2017 23:00:00, NaN  
16-Dec-2017, NaN  
16-Dec-2017 01:00:00, NaN  
16-Dec-2017 02:00:00, NaN  
16-Dec-2017 03:00:00, NaN  
16-Dec-2017 04:00:00, NaN  
16-Dec-2017 05:00:00, NaN  
16-Dec-2017 06:00:00, NaN  
16-Dec-2017 07:00:00, NaN  
16-Dec-2017 08:00:00, NaN  
16-Dec-2017 09:00:00, NaN  
16-Dec-2017 10:00:00, NaN  
16-Dec-2017 11:00:00, NaN  
16-Dec-2017 12:00:00, NaN  
16-Dec-2017 13:00:00, NaN  
16-Dec-2017 14:00:00, NaN  
16-Dec-2017 15:00:00, NaN  
16-Dec-2017 16:00:00, NaN  
16-Dec-2017 17:00:00, NaN  
16-Dec-2017 18:00:00, NaN  
16-Dec-2017 19:00:00, NaN  
16-Dec-2017 20:00:00, NaN  
16-Dec-2017 21:00:00, NaN  
16-Dec-2017 22:00:00, NaN  
16-Dec-2017 23:00:00, NaN  
17-Dec-2017, NaN  
17-Dec-2017 01:00:00, NaN  
17-Dec-2017 02:00:00, NaN  
17-Dec-2017 03:00:00, NaN  
17-Dec-2017 04:00:00, NaN  
17-Dec-2017 05:00:00, NaN

17-Dec-2017 06:00:00, NaN  
17-Dec-2017 07:00:00, NaN  
17-Dec-2017 08:00:00, NaN  
17-Dec-2017 09:00:00, NaN  
17-Dec-2017 10:00:00, NaN  
17-Dec-2017 11:00:00, NaN  
17-Dec-2017 12:00:00, NaN  
17-Dec-2017 13:00:00, NaN  
17-Dec-2017 14:00:00, NaN  
17-Dec-2017 15:00:00, NaN  
17-Dec-2017 16:00:00, NaN  
17-Dec-2017 17:00:00, NaN  
17-Dec-2017 18:00:00, NaN  
17-Dec-2017 19:00:00, NaN  
17-Dec-2017 20:00:00, NaN  
17-Dec-2017 21:00:00, NaN  
17-Dec-2017 22:00:00, NaN  
17-Dec-2017 23:00:00, NaN  
18-Dec-2017, NaN  
18-Dec-2017 01:00:00, NaN  
18-Dec-2017 02:00:00, NaN  
18-Dec-2017 03:00:00, NaN  
18-Dec-2017 04:00:00, NaN  
18-Dec-2017 05:00:00, NaN  
18-Dec-2017 06:00:00, NaN  
18-Dec-2017 07:00:00, NaN  
18-Dec-2017 08:00:00, NaN  
18-Dec-2017 09:00:00, NaN  
18-Dec-2017 10:00:00, NaN  
18-Dec-2017 11:00:00, NaN  
18-Dec-2017 12:00:00, NaN  
18-Dec-2017 13:00:00, NaN  
18-Dec-2017 14:00:00, NaN  
18-Dec-2017 15:00:00, NaN  
18-Dec-2017 16:00:00, NaN  
18-Dec-2017 17:00:00, NaN  
18-Dec-2017 18:00:00, NaN  
18-Dec-2017 19:00:00, NaN  
18-Dec-2017 20:00:00, NaN  
18-Dec-2017 21:00:00, NaN  
18-Dec-2017 22:00:00, NaN  
18-Dec-2017 23:00:00, NaN  
19-Dec-2017, NaN  
19-Dec-2017 01:00:00, NaN  
19-Dec-2017 02:00:00, NaN  
19-Dec-2017 03:00:00, NaN  
19-Dec-2017 04:00:00, NaN  
19-Dec-2017 05:00:00, NaN  
19-Dec-2017 06:00:00, NaN  
19-Dec-2017 07:00:00, NaN  
19-Dec-2017 08:00:00, NaN  
19-Dec-2017 09:00:00, NaN  
19-Dec-2017 10:00:00, NaN  
19-Dec-2017 11:00:00, NaN  
19-Dec-2017 12:00:00, NaN  
19-Dec-2017 13:00:00, NaN  
19-Dec-2017 14:00:00, NaN  
19-Dec-2017 15:00:00, NaN  
19-Dec-2017 16:00:00, NaN  
19-Dec-2017 17:00:00, NaN  
19-Dec-2017 18:00:00, NaN  
19-Dec-2017 19:00:00, NaN  
19-Dec-2017 20:00:00, NaN  
19-Dec-2017 21:00:00, NaN

19-Dec-2017 22:00:00, NaN  
19-Dec-2017 23:00:00, NaN  
20-Dec-2017, NaN  
20-Dec-2017 01:00:00, NaN  
20-Dec-2017 02:00:00, NaN  
20-Dec-2017 03:00:00, NaN  
20-Dec-2017 04:00:00, NaN  
20-Dec-2017 05:00:00, NaN  
20-Dec-2017 06:00:00, NaN  
20-Dec-2017 07:00:00, NaN  
20-Dec-2017 08:00:00, NaN  
20-Dec-2017 09:00:00, NaN  
20-Dec-2017 10:00:00, NaN  
20-Dec-2017 11:00:00, NaN  
20-Dec-2017 12:00:00, NaN  
20-Dec-2017 13:00:00, NaN  
20-Dec-2017 14:00:00, NaN  
20-Dec-2017 15:00:00, NaN  
20-Dec-2017 16:00:00, NaN  
20-Dec-2017 17:00:00, NaN  
20-Dec-2017 18:00:00, NaN  
20-Dec-2017 19:00:00, NaN  
20-Dec-2017 20:00:00, NaN  
20-Dec-2017 21:00:00, NaN  
20-Dec-2017 22:00:00, NaN  
20-Dec-2017 23:00:00, NaN  
21-Dec-2017, NaN  
21-Dec-2017 01:00:00, NaN  
21-Dec-2017 02:00:00, NaN  
21-Dec-2017 03:00:00, NaN  
21-Dec-2017 04:00:00, NaN  
21-Dec-2017 05:00:00, NaN  
21-Dec-2017 06:00:00, NaN  
21-Dec-2017 07:00:00, NaN  
21-Dec-2017 08:00:00, NaN  
21-Dec-2017 09:00:00, NaN  
21-Dec-2017 10:00:00, NaN  
21-Dec-2017 11:00:00, NaN  
21-Dec-2017 12:00:00, NaN  
21-Dec-2017 13:00:00, NaN  
21-Dec-2017 14:00:00, NaN  
21-Dec-2017 15:00:00, NaN  
21-Dec-2017 16:00:00, NaN  
21-Dec-2017 17:00:00, NaN  
21-Dec-2017 18:00:00, NaN  
21-Dec-2017 19:00:00, NaN  
21-Dec-2017 20:00:00, NaN  
21-Dec-2017 21:00:00, NaN  
21-Dec-2017 22:00:00, NaN  
21-Dec-2017 23:00:00, NaN  
22-Dec-2017, NaN  
22-Dec-2017 01:00:00, NaN  
22-Dec-2017 02:00:00, NaN  
22-Dec-2017 03:00:00, NaN  
22-Dec-2017 04:00:00, NaN  
22-Dec-2017 05:00:00, NaN  
22-Dec-2017 06:00:00, NaN  
22-Dec-2017 07:00:00, NaN  
22-Dec-2017 08:00:00, NaN  
22-Dec-2017 09:00:00, NaN  
22-Dec-2017 10:00:00, NaN  
22-Dec-2017 11:00:00, NaN  
22-Dec-2017 12:00:00, NaN  
22-Dec-2017 13:00:00, NaN



22-Dec-2017 14:00:00, NaN  
22-Dec-2017 15:00:00, NaN  
22-Dec-2017 16:00:00, NaN  
22-Dec-2017 17:00:00, NaN  
22-Dec-2017 18:00:00, NaN  
22-Dec-2017 19:00:00, NaN  
22-Dec-2017 20:00:00, NaN  
22-Dec-2017 21:00:00, NaN  
22-Dec-2017 22:00:00, NaN  
22-Dec-2017 23:00:00, NaN  
23-Dec-2017, NaN  
23-Dec-2017 01:00:00, NaN  
23-Dec-2017 02:00:00, NaN  
23-Dec-2017 03:00:00, NaN  
23-Dec-2017 04:00:00, NaN  
23-Dec-2017 05:00:00, NaN  
23-Dec-2017 06:00:00, NaN  
23-Dec-2017 07:00:00, NaN  
23-Dec-2017 08:00:00, NaN  
23-Dec-2017 09:00:00, NaN  
23-Dec-2017 10:00:00, NaN  
23-Dec-2017 11:00:00, NaN  
23-Dec-2017 12:00:00, NaN  
23-Dec-2017 13:00:00, NaN  
23-Dec-2017 14:00:00, NaN  
23-Dec-2017 15:00:00, NaN  
23-Dec-2017 16:00:00, NaN  
23-Dec-2017 17:00:00, NaN  
23-Dec-2017 18:00:00, NaN  
23-Dec-2017 19:00:00, NaN  
23-Dec-2017 20:00:00, NaN  
23-Dec-2017 21:00:00, NaN  
23-Dec-2017 22:00:00, NaN  
23-Dec-2017 23:00:00, NaN  
24-Dec-2017, NaN  
24-Dec-2017 01:00:00, NaN  
24-Dec-2017 02:00:00, NaN  
24-Dec-2017 03:00:00, NaN  
24-Dec-2017 04:00:00, NaN  
24-Dec-2017 05:00:00, NaN  
24-Dec-2017 06:00:00, NaN  
24-Dec-2017 07:00:00, NaN  
24-Dec-2017 08:00:00, NaN  
24-Dec-2017 09:00:00, NaN  
24-Dec-2017 10:00:00, NaN  
24-Dec-2017 11:00:00, NaN  
24-Dec-2017 12:00:00, NaN  
24-Dec-2017 13:00:00, NaN  
24-Dec-2017 14:00:00, NaN  
24-Dec-2017 15:00:00, NaN  
24-Dec-2017 16:00:00, NaN  
24-Dec-2017 17:00:00, NaN  
24-Dec-2017 18:00:00, NaN  
24-Dec-2017 19:00:00, NaN  
24-Dec-2017 20:00:00, NaN  
24-Dec-2017 21:00:00, NaN  
24-Dec-2017 22:00:00, NaN  
24-Dec-2017 23:00:00, NaN  
25-Dec-2017, NaN  
25-Dec-2017 01:00:00, NaN  
25-Dec-2017 02:00:00, NaN  
25-Dec-2017 03:00:00, NaN  
25-Dec-2017 04:00:00, NaN  
25-Dec-2017 05:00:00, NaN

|              |           |     |
|--------------|-----------|-----|
| 25-Dec-2017  | 06:00:00, | NaN |
| 25-Dec-2017  | 07:00:00, | NaN |
| 25-Dec-2017  | 08:00:00, | NaN |
| 25-Dec-2017  | 09:00:00, | NaN |
| 25-Dec-2017  | 10:00:00, | NaN |
| 25-Dec-2017  | 11:00:00, | NaN |
| 25-Dec-2017  | 12:00:00, | NaN |
| 25-Dec-2017  | 13:00:00, | NaN |
| 25-Dec-2017  | 14:00:00, | NaN |
| 25-Dec-2017  | 15:00:00, | NaN |
| 25-Dec-2017  | 16:00:00, | NaN |
| 25-Dec-2017  | 17:00:00, | NaN |
| 25-Dec-2017  | 18:00:00, | NaN |
| 25-Dec-2017  | 19:00:00, | NaN |
| 25-Dec-2017  | 20:00:00, | NaN |
| 25-Dec-2017  | 21:00:00, | NaN |
| 25-Dec-2017  | 22:00:00, | NaN |
| 25-Dec-2017  | 23:00:00, | NaN |
| 26-Dec-2017, | NaN       |     |
| 26-Dec-2017  | 01:00:00, | NaN |
| 26-Dec-2017  | 02:00:00, | NaN |
| 26-Dec-2017  | 03:00:00, | NaN |
| 26-Dec-2017  | 04:00:00, | NaN |
| 26-Dec-2017  | 05:00:00, | NaN |
| 26-Dec-2017  | 06:00:00, | NaN |
| 26-Dec-2017  | 07:00:00, | NaN |
| 26-Dec-2017  | 08:00:00, | NaN |
| 26-Dec-2017  | 09:00:00, | NaN |
| 26-Dec-2017  | 10:00:00, | NaN |
| 26-Dec-2017  | 11:00:00, | NaN |
| 26-Dec-2017  | 12:00:00, | NaN |
| 26-Dec-2017  | 13:00:00, | NaN |
| 26-Dec-2017  | 14:00:00, | NaN |
| 26-Dec-2017  | 15:00:00, | NaN |
| 26-Dec-2017  | 16:00:00, | NaN |
| 26-Dec-2017  | 17:00:00, | NaN |
| 26-Dec-2017  | 18:00:00, | NaN |
| 26-Dec-2017  | 19:00:00, | NaN |
| 26-Dec-2017  | 20:00:00, | NaN |
| 26-Dec-2017  | 21:00:00, | NaN |
| 26-Dec-2017  | 22:00:00, | NaN |
| 26-Dec-2017  | 23:00:00, | NaN |
| 27-Dec-2017, | NaN       |     |
| 27-Dec-2017  | 01:00:00, | NaN |
| 27-Dec-2017  | 02:00:00, | NaN |
| 27-Dec-2017  | 03:00:00, | NaN |
| 27-Dec-2017  | 04:00:00, | NaN |
| 27-Dec-2017  | 05:00:00, | NaN |
| 27-Dec-2017  | 06:00:00, | NaN |
| 27-Dec-2017  | 07:00:00, | NaN |
| 27-Dec-2017  | 08:00:00, | NaN |
| 27-Dec-2017  | 09:00:00, | NaN |
| 27-Dec-2017  | 10:00:00, | NaN |
| 27-Dec-2017  | 11:00:00, | NaN |
| 27-Dec-2017  | 12:00:00, | NaN |
| 27-Dec-2017  | 13:00:00, | NaN |
| 27-Dec-2017  | 14:00:00, | NaN |
| 27-Dec-2017  | 15:00:00, | NaN |
| 27-Dec-2017  | 16:00:00, | NaN |
| 27-Dec-2017  | 17:00:00, | NaN |
| 27-Dec-2017  | 18:00:00, | NaN |
| 27-Dec-2017  | 19:00:00, | NaN |
| 27-Dec-2017  | 20:00:00, | NaN |
| 27-Dec-2017  | 21:00:00, | NaN |

27-Dec-2017 22:00:00, NaN  
27-Dec-2017 23:00:00, NaN  
28-Dec-2017, NaN  
28-Dec-2017 01:00:00, NaN  
28-Dec-2017 02:00:00, NaN  
28-Dec-2017 03:00:00, NaN  
28-Dec-2017 04:00:00, NaN  
28-Dec-2017 05:00:00, NaN  
28-Dec-2017 06:00:00, NaN  
28-Dec-2017 07:00:00, NaN  
28-Dec-2017 08:00:00, NaN  
28-Dec-2017 09:00:00, NaN  
28-Dec-2017 10:00:00, NaN  
28-Dec-2017 11:00:00, NaN  
28-Dec-2017 12:00:00, NaN  
28-Dec-2017 13:00:00, NaN  
28-Dec-2017 14:00:00, NaN  
28-Dec-2017 15:00:00, NaN  
28-Dec-2017 16:00:00, NaN  
28-Dec-2017 17:00:00, NaN  
28-Dec-2017 18:00:00, NaN  
28-Dec-2017 19:00:00, NaN  
28-Dec-2017 20:00:00, NaN  
28-Dec-2017 21:00:00, NaN  
28-Dec-2017 22:00:00, NaN  
28-Dec-2017 23:00:00, NaN  
29-Dec-2017, NaN  
29-Dec-2017 01:00:00, NaN  
29-Dec-2017 02:00:00, NaN  
29-Dec-2017 03:00:00, NaN  
29-Dec-2017 04:00:00, NaN  
29-Dec-2017 05:00:00, NaN  
29-Dec-2017 06:00:00, NaN  
29-Dec-2017 07:00:00, NaN  
29-Dec-2017 08:00:00, NaN  
29-Dec-2017 09:00:00, NaN  
29-Dec-2017 10:00:00, NaN  
29-Dec-2017 11:00:00, NaN  
29-Dec-2017 12:00:00, NaN  
29-Dec-2017 13:00:00, NaN  
29-Dec-2017 14:00:00, NaN  
29-Dec-2017 15:00:00, NaN  
29-Dec-2017 16:00:00, NaN  
29-Dec-2017 17:00:00, NaN  
29-Dec-2017 18:00:00, NaN  
29-Dec-2017 19:00:00, NaN  
29-Dec-2017 20:00:00, NaN  
29-Dec-2017 21:00:00, NaN  
29-Dec-2017 22:00:00, NaN  
29-Dec-2017 23:00:00, NaN  
30-Dec-2017, NaN  
30-Dec-2017 01:00:00, NaN  
30-Dec-2017 02:00:00, NaN  
30-Dec-2017 03:00:00, NaN  
30-Dec-2017 04:00:00, NaN  
30-Dec-2017 05:00:00, NaN  
30-Dec-2017 06:00:00, NaN  
30-Dec-2017 07:00:00, NaN  
30-Dec-2017 08:00:00, NaN  
30-Dec-2017 09:00:00, NaN  
30-Dec-2017 10:00:00, NaN  
30-Dec-2017 11:00:00, NaN  
30-Dec-2017 12:00:00, NaN  
30-Dec-2017 13:00:00, NaN

30-Dec-2017 14:00:00, NaN  
30-Dec-2017 15:00:00, NaN  
30-Dec-2017 16:00:00, NaN  
30-Dec-2017 17:00:00, NaN  
30-Dec-2017 18:00:00, NaN  
30-Dec-2017 19:00:00, NaN  
30-Dec-2017 20:00:00, NaN  
30-Dec-2017 21:00:00, NaN  
30-Dec-2017 22:00:00, NaN  
30-Dec-2017 23:00:00, NaN  
31-Dec-2017, NaN  
31-Dec-2017 01:00:00, NaN  
31-Dec-2017 02:00:00, NaN  
31-Dec-2017 03:00:00, NaN  
31-Dec-2017 04:00:00, NaN  
31-Dec-2017 05:00:00, NaN  
31-Dec-2017 06:00:00, NaN  
31-Dec-2017 07:00:00, NaN  
31-Dec-2017 08:00:00, NaN  
31-Dec-2017 09:00:00, NaN  
31-Dec-2017 10:00:00, NaN  
31-Dec-2017 11:00:00, NaN  
31-Dec-2017 12:00:00, NaN  
31-Dec-2017 13:00:00, NaN  
31-Dec-2017 14:00:00, NaN  
31-Dec-2017 15:00:00, NaN  
31-Dec-2017 16:00:00, NaN  
31-Dec-2017 17:00:00, NaN  
31-Dec-2017 18:00:00, NaN  
31-Dec-2017 19:00:00, NaN  
31-Dec-2017 20:00:00, NaN  
31-Dec-2017 21:00:00, NaN  
31-Dec-2017 22:00:00, NaN  
31-Dec-2017 23:00:00, NaN  
01-Jan-2018, NaN  
01-Jan-2018 01:00:00, NaN  
01-Jan-2018 02:00:00, NaN  
01-Jan-2018 03:00:00, NaN  
01-Jan-2018 04:00:00, NaN  
01-Jan-2018 05:00:00, NaN  
01-Jan-2018 06:00:00, NaN  
01-Jan-2018 07:00:00, NaN  
01-Jan-2018 08:00:00, NaN  
01-Jan-2018 09:00:00, NaN  
01-Jan-2018 10:00:00, NaN  
01-Jan-2018 11:00:00, NaN  
01-Jan-2018 12:00:00, NaN  
01-Jan-2018 13:00:00, NaN  
01-Jan-2018 14:00:00, NaN  
01-Jan-2018 15:00:00, NaN  
01-Jan-2018 16:00:00, NaN  
01-Jan-2018 17:00:00, NaN  
01-Jan-2018 18:00:00, NaN  
01-Jan-2018 19:00:00, NaN  
01-Jan-2018 20:00:00, NaN  
01-Jan-2018 21:00:00, NaN  
01-Jan-2018 22:00:00, NaN  
01-Jan-2018 23:00:00, NaN  
02-Jan-2018, NaN  
02-Jan-2018 01:00:00, NaN  
02-Jan-2018 02:00:00, NaN  
02-Jan-2018 03:00:00, NaN  
02-Jan-2018 04:00:00, NaN  
02-Jan-2018 05:00:00, NaN

|              |           |     |
|--------------|-----------|-----|
| 02-Jan-2018  | 06:00:00, | NaN |
| 02-Jan-2018  | 07:00:00, | NaN |
| 02-Jan-2018  | 08:00:00, | NaN |
| 02-Jan-2018  | 09:00:00, | NaN |
| 02-Jan-2018  | 10:00:00, | NaN |
| 02-Jan-2018  | 11:00:00, | NaN |
| 02-Jan-2018  | 12:00:00, | NaN |
| 02-Jan-2018  | 13:00:00, | NaN |
| 02-Jan-2018  | 14:00:00, | NaN |
| 02-Jan-2018  | 15:00:00, | NaN |
| 02-Jan-2018  | 16:00:00, | NaN |
| 02-Jan-2018  | 17:00:00, | NaN |
| 02-Jan-2018  | 18:00:00, | NaN |
| 02-Jan-2018  | 19:00:00, | NaN |
| 02-Jan-2018  | 20:00:00, | NaN |
| 02-Jan-2018  | 21:00:00, | NaN |
| 02-Jan-2018  | 22:00:00, | NaN |
| 02-Jan-2018  | 23:00:00, | NaN |
| 03-Jan-2018, |           | NaN |
| 03-Jan-2018  | 01:00:00, | NaN |
| 03-Jan-2018  | 02:00:00, | NaN |
| 03-Jan-2018  | 03:00:00, | NaN |
| 03-Jan-2018  | 04:00:00, | NaN |
| 03-Jan-2018  | 05:00:00, | NaN |
| 03-Jan-2018  | 06:00:00, | NaN |
| 03-Jan-2018  | 07:00:00, | NaN |
| 03-Jan-2018  | 08:00:00, | NaN |
| 03-Jan-2018  | 09:00:00, | NaN |
| 03-Jan-2018  | 10:00:00, | NaN |
| 03-Jan-2018  | 11:00:00, | NaN |
| 03-Jan-2018  | 12:00:00, | NaN |
| 03-Jan-2018  | 13:00:00, | NaN |
| 03-Jan-2018  | 14:00:00, | NaN |
| 03-Jan-2018  | 15:00:00, | NaN |
| 03-Jan-2018  | 16:00:00, | NaN |
| 03-Jan-2018  | 17:00:00, | NaN |
| 03-Jan-2018  | 18:00:00, | NaN |
| 03-Jan-2018  | 19:00:00, | NaN |
| 03-Jan-2018  | 20:00:00, | NaN |
| 03-Jan-2018  | 21:00:00, | NaN |
| 03-Jan-2018  | 22:00:00, | NaN |
| 03-Jan-2018  | 23:00:00, | NaN |
| 04-Jan-2018, |           | NaN |
| 04-Jan-2018  | 01:00:00, | NaN |
| 04-Jan-2018  | 02:00:00, | NaN |
| 04-Jan-2018  | 03:00:00, | NaN |
| 04-Jan-2018  | 04:00:00, | NaN |
| 04-Jan-2018  | 05:00:00, | NaN |
| 04-Jan-2018  | 06:00:00, | NaN |
| 04-Jan-2018  | 07:00:00, | NaN |
| 04-Jan-2018  | 08:00:00, | NaN |
| 04-Jan-2018  | 09:00:00, | NaN |
| 04-Jan-2018  | 10:00:00, | NaN |
| 04-Jan-2018  | 11:00:00, | NaN |
| 04-Jan-2018  | 12:00:00, | NaN |
| 04-Jan-2018  | 13:00:00, | NaN |
| 04-Jan-2018  | 14:00:00, | NaN |
| 04-Jan-2018  | 15:00:00, | NaN |
| 04-Jan-2018  | 16:00:00, | NaN |
| 04-Jan-2018  | 17:00:00, | NaN |
| 04-Jan-2018  | 18:00:00, | NaN |
| 04-Jan-2018  | 19:00:00, | NaN |
| 04-Jan-2018  | 20:00:00, | NaN |
| 04-Jan-2018  | 21:00:00, | NaN |

04-Jan-2018 22:00:00, NaN  
04-Jan-2018 23:00:00, NaN  
05-Jan-2018, NaN  
05-Jan-2018 01:00:00, NaN  
05-Jan-2018 02:00:00, NaN  
05-Jan-2018 03:00:00, NaN  
05-Jan-2018 04:00:00, NaN  
05-Jan-2018 05:00:00, NaN  
05-Jan-2018 06:00:00, NaN  
05-Jan-2018 07:00:00, NaN  
05-Jan-2018 08:00:00, NaN  
05-Jan-2018 09:00:00, NaN  
05-Jan-2018 10:00:00, NaN  
05-Jan-2018 11:00:00, NaN  
05-Jan-2018 12:00:00, NaN  
05-Jan-2018 13:00:00, NaN  
05-Jan-2018 14:00:00, NaN  
05-Jan-2018 15:00:00, NaN  
05-Jan-2018 16:00:00, NaN  
05-Jan-2018 17:00:00, NaN  
05-Jan-2018 18:00:00, NaN  
05-Jan-2018 19:00:00, NaN  
05-Jan-2018 20:00:00, NaN  
05-Jan-2018 21:00:00, NaN  
05-Jan-2018 22:00:00, NaN  
05-Jan-2018 23:00:00, NaN  
06-Jan-2018, NaN  
06-Jan-2018 01:00:00, NaN  
06-Jan-2018 02:00:00, NaN  
06-Jan-2018 03:00:00, NaN  
06-Jan-2018 04:00:00, NaN  
06-Jan-2018 05:00:00, NaN  
06-Jan-2018 06:00:00, NaN  
06-Jan-2018 07:00:00, NaN  
06-Jan-2018 08:00:00, NaN  
06-Jan-2018 09:00:00, NaN  
06-Jan-2018 10:00:00, NaN  
06-Jan-2018 11:00:00, NaN  
06-Jan-2018 12:00:00, NaN  
06-Jan-2018 13:00:00, NaN  
06-Jan-2018 14:00:00, NaN  
06-Jan-2018 15:00:00, NaN  
06-Jan-2018 16:00:00, NaN  
06-Jan-2018 17:00:00, NaN  
06-Jan-2018 18:00:00, NaN  
06-Jan-2018 19:00:00, NaN  
06-Jan-2018 20:00:00, NaN  
06-Jan-2018 21:00:00, NaN  
06-Jan-2018 22:00:00, NaN  
06-Jan-2018 23:00:00, NaN  
07-Jan-2018, NaN  
07-Jan-2018 01:00:00, NaN  
07-Jan-2018 02:00:00, NaN  
07-Jan-2018 03:00:00, NaN  
07-Jan-2018 04:00:00, NaN  
07-Jan-2018 05:00:00, NaN  
07-Jan-2018 06:00:00, NaN  
07-Jan-2018 07:00:00, NaN  
07-Jan-2018 08:00:00, NaN  
07-Jan-2018 09:00:00, NaN  
07-Jan-2018 10:00:00, NaN  
07-Jan-2018 11:00:00, NaN  
07-Jan-2018 12:00:00, NaN  
07-Jan-2018 13:00:00, NaN

07-Jan-2018 14:00:00, NaN  
07-Jan-2018 15:00:00, NaN  
07-Jan-2018 16:00:00, NaN  
07-Jan-2018 17:00:00, NaN  
07-Jan-2018 18:00:00, NaN  
07-Jan-2018 19:00:00, NaN  
07-Jan-2018 20:00:00, NaN  
07-Jan-2018 21:00:00, NaN  
07-Jan-2018 22:00:00, NaN  
07-Jan-2018 23:00:00, NaN  
08-Jan-2018, NaN  
08-Jan-2018 01:00:00, NaN  
08-Jan-2018 02:00:00, NaN  
08-Jan-2018 03:00:00, NaN  
08-Jan-2018 04:00:00, NaN  
08-Jan-2018 05:00:00, NaN  
08-Jan-2018 06:00:00, NaN  
08-Jan-2018 07:00:00, NaN  
08-Jan-2018 08:00:00, NaN  
08-Jan-2018 09:00:00, NaN  
08-Jan-2018 10:00:00, NaN  
08-Jan-2018 11:00:00, NaN  
08-Jan-2018 12:00:00, NaN  
08-Jan-2018 13:00:00, NaN  
08-Jan-2018 14:00:00, NaN  
08-Jan-2018 15:00:00, NaN  
08-Jan-2018 16:00:00, NaN  
08-Jan-2018 17:00:00, NaN  
08-Jan-2018 18:00:00, NaN  
08-Jan-2018 19:00:00, NaN  
08-Jan-2018 20:00:00, NaN  
08-Jan-2018 21:00:00, NaN  
08-Jan-2018 22:00:00, NaN  
08-Jan-2018 23:00:00, NaN  
09-Jan-2018, NaN  
09-Jan-2018 01:00:00, NaN  
09-Jan-2018 02:00:00, NaN  
09-Jan-2018 03:00:00, NaN  
09-Jan-2018 04:00:00, NaN  
09-Jan-2018 05:00:00, NaN  
09-Jan-2018 06:00:00, NaN  
09-Jan-2018 07:00:00, NaN  
09-Jan-2018 08:00:00, NaN  
09-Jan-2018 09:00:00, NaN  
09-Jan-2018 10:00:00, NaN  
09-Jan-2018 11:00:00, NaN  
09-Jan-2018 12:00:00, NaN  
09-Jan-2018 13:00:00, NaN  
09-Jan-2018 14:00:00, NaN  
09-Jan-2018 15:00:00, NaN  
09-Jan-2018 16:00:00, NaN  
09-Jan-2018 17:00:00, NaN  
09-Jan-2018 18:00:00, NaN  
09-Jan-2018 19:00:00, NaN  
09-Jan-2018 20:00:00, NaN  
09-Jan-2018 21:00:00, NaN  
09-Jan-2018 22:00:00, NaN  
09-Jan-2018 23:00:00, NaN  
10-Jan-2018, NaN  
10-Jan-2018 01:00:00, NaN  
10-Jan-2018 02:00:00, NaN  
10-Jan-2018 03:00:00, NaN  
10-Jan-2018 04:00:00, NaN  
10-Jan-2018 05:00:00, NaN

10-Jan-2018 06:00:00, NaN  
10-Jan-2018 07:00:00, NaN  
10-Jan-2018 08:00:00, NaN  
10-Jan-2018 09:00:00, NaN  
10-Jan-2018 10:00:00, NaN  
10-Jan-2018 11:00:00, NaN  
10-Jan-2018 12:00:00, NaN  
10-Jan-2018 13:00:00, NaN  
10-Jan-2018 14:00:00, NaN  
10-Jan-2018 15:00:00, NaN  
10-Jan-2018 16:00:00, NaN  
10-Jan-2018 17:00:00, NaN  
10-Jan-2018 18:00:00, NaN  
10-Jan-2018 19:00:00, NaN  
10-Jan-2018 20:00:00, NaN  
10-Jan-2018 21:00:00, NaN  
10-Jan-2018 22:00:00, NaN  
10-Jan-2018 23:00:00, NaN  
11-Jan-2018, NaN  
11-Jan-2018 01:00:00, NaN  
11-Jan-2018 02:00:00, NaN  
11-Jan-2018 03:00:00, NaN  
11-Jan-2018 04:00:00, NaN  
11-Jan-2018 05:00:00, NaN  
11-Jan-2018 06:00:00, NaN  
11-Jan-2018 07:00:00, NaN  
11-Jan-2018 08:00:00, NaN  
11-Jan-2018 09:00:00, NaN  
11-Jan-2018 10:00:00, NaN  
11-Jan-2018 11:00:00, NaN  
11-Jan-2018 12:00:00, NaN  
11-Jan-2018 13:00:00, NaN  
11-Jan-2018 14:00:00, NaN  
11-Jan-2018 15:00:00, NaN  
11-Jan-2018 16:00:00, NaN  
11-Jan-2018 17:00:00, NaN  
11-Jan-2018 18:00:00, NaN  
11-Jan-2018 19:00:00, NaN  
11-Jan-2018 20:00:00, NaN  
11-Jan-2018 21:00:00, NaN  
11-Jan-2018 22:00:00, NaN  
11-Jan-2018 23:00:00, NaN  
12-Jan-2018, NaN  
12-Jan-2018 01:00:00, NaN  
12-Jan-2018 02:00:00, NaN  
12-Jan-2018 03:00:00, NaN  
12-Jan-2018 04:00:00, NaN  
12-Jan-2018 05:00:00, NaN  
12-Jan-2018 06:00:00, NaN  
12-Jan-2018 07:00:00, NaN  
12-Jan-2018 08:00:00, NaN  
12-Jan-2018 09:00:00, NaN  
12-Jan-2018 10:00:00, NaN  
12-Jan-2018 11:00:00, NaN  
12-Jan-2018 12:00:00, NaN  
12-Jan-2018 13:00:00, NaN  
12-Jan-2018 14:00:00, NaN  
12-Jan-2018 15:00:00, NaN  
12-Jan-2018 16:00:00, NaN  
12-Jan-2018 17:00:00, NaN  
12-Jan-2018 18:00:00, NaN  
12-Jan-2018 19:00:00, NaN  
12-Jan-2018 20:00:00, NaN  
12-Jan-2018 21:00:00, NaN



12-Jan-2018 22:00:00, NaN  
12-Jan-2018 23:00:00, NaN  
13-Jan-2018, NaN  
13-Jan-2018 01:00:00, NaN  
13-Jan-2018 02:00:00, NaN  
13-Jan-2018 03:00:00, NaN  
13-Jan-2018 04:00:00, NaN  
13-Jan-2018 05:00:00, NaN  
13-Jan-2018 06:00:00, NaN  
13-Jan-2018 07:00:00, NaN  
13-Jan-2018 08:00:00, NaN  
13-Jan-2018 09:00:00, NaN  
13-Jan-2018 10:00:00, NaN  
13-Jan-2018 11:00:00, NaN  
13-Jan-2018 12:00:00, NaN  
13-Jan-2018 13:00:00, NaN  
13-Jan-2018 14:00:00, NaN  
13-Jan-2018 15:00:00, NaN  
13-Jan-2018 16:00:00, NaN  
13-Jan-2018 17:00:00, NaN  
13-Jan-2018 18:00:00, NaN  
13-Jan-2018 19:00:00, NaN  
13-Jan-2018 20:00:00, NaN  
13-Jan-2018 21:00:00, NaN  
13-Jan-2018 22:00:00, NaN  
13-Jan-2018 23:00:00, NaN  
14-Jan-2018, NaN  
14-Jan-2018 01:00:00, NaN  
14-Jan-2018 02:00:00, NaN  
14-Jan-2018 03:00:00, NaN  
14-Jan-2018 04:00:00, NaN  
14-Jan-2018 05:00:00, NaN  
14-Jan-2018 06:00:00, NaN  
14-Jan-2018 07:00:00, NaN  
14-Jan-2018 08:00:00, NaN  
14-Jan-2018 09:00:00, NaN  
14-Jan-2018 10:00:00, NaN  
14-Jan-2018 11:00:00, NaN  
14-Jan-2018 12:00:00, NaN  
14-Jan-2018 13:00:00, NaN  
14-Jan-2018 14:00:00, NaN  
14-Jan-2018 15:00:00, NaN  
14-Jan-2018 16:00:00, NaN  
14-Jan-2018 17:00:00, NaN  
14-Jan-2018 18:00:00, NaN  
14-Jan-2018 19:00:00, NaN  
14-Jan-2018 20:00:00, NaN  
14-Jan-2018 21:00:00, NaN  
14-Jan-2018 22:00:00, NaN  
14-Jan-2018 23:00:00, NaN  
15-Jan-2018, NaN  
15-Jan-2018 01:00:00, NaN  
15-Jan-2018 02:00:00, NaN  
15-Jan-2018 03:00:00, NaN  
15-Jan-2018 04:00:00, NaN  
15-Jan-2018 05:00:00, NaN  
15-Jan-2018 06:00:00, NaN  
15-Jan-2018 07:00:00, NaN  
15-Jan-2018 08:00:00, NaN  
15-Jan-2018 09:00:00, NaN  
15-Jan-2018 10:00:00, NaN  
15-Jan-2018 11:00:00, NaN  
15-Jan-2018 12:00:00, NaN  
15-Jan-2018 13:00:00, NaN

15-Jan-2018 14:00:00, NaN  
15-Jan-2018 15:00:00, NaN  
15-Jan-2018 16:00:00, NaN  
15-Jan-2018 17:00:00, NaN  
15-Jan-2018 18:00:00, NaN  
15-Jan-2018 19:00:00, NaN  
15-Jan-2018 20:00:00, NaN  
15-Jan-2018 21:00:00, NaN  
15-Jan-2018 22:00:00, NaN  
15-Jan-2018 23:00:00, NaN  
16-Jan-2018, NaN  
16-Jan-2018 01:00:00, NaN  
16-Jan-2018 02:00:00, NaN  
16-Jan-2018 03:00:00, NaN  
16-Jan-2018 04:00:00, NaN  
16-Jan-2018 05:00:00, NaN  
16-Jan-2018 06:00:00, NaN  
16-Jan-2018 07:00:00, NaN  
16-Jan-2018 08:00:00, NaN  
16-Jan-2018 09:00:00, NaN  
16-Jan-2018 10:00:00, NaN  
16-Jan-2018 11:00:00, NaN  
16-Jan-2018 12:00:00, NaN  
16-Jan-2018 13:00:00, NaN  
16-Jan-2018 14:00:00, NaN  
16-Jan-2018 15:00:00, NaN  
16-Jan-2018 16:00:00, NaN  
16-Jan-2018 17:00:00, NaN  
16-Jan-2018 18:00:00, NaN  
16-Jan-2018 19:00:00, NaN  
16-Jan-2018 20:00:00, NaN  
16-Jan-2018 21:00:00, NaN  
16-Jan-2018 22:00:00, NaN  
16-Jan-2018 23:00:00, NaN  
17-Jan-2018, NaN  
17-Jan-2018 01:00:00, NaN  
17-Jan-2018 02:00:00, NaN  
17-Jan-2018 03:00:00, NaN  
17-Jan-2018 04:00:00, NaN  
17-Jan-2018 05:00:00, NaN  
17-Jan-2018 06:00:00, NaN  
17-Jan-2018 07:00:00, NaN  
17-Jan-2018 08:00:00, NaN  
17-Jan-2018 09:00:00, NaN  
17-Jan-2018 10:00:00, NaN  
17-Jan-2018 11:00:00, NaN  
17-Jan-2018 12:00:00, NaN  
17-Jan-2018 13:00:00, NaN  
17-Jan-2018 14:00:00, NaN  
17-Jan-2018 15:00:00, NaN  
17-Jan-2018 16:00:00, NaN  
17-Jan-2018 17:00:00, NaN  
17-Jan-2018 18:00:00, NaN  
17-Jan-2018 19:00:00, NaN  
17-Jan-2018 20:00:00, NaN  
17-Jan-2018 21:00:00, NaN  
17-Jan-2018 22:00:00, NaN  
17-Jan-2018 23:00:00, NaN  
18-Jan-2018, NaN  
18-Jan-2018 01:00:00, NaN  
18-Jan-2018 02:00:00, NaN  
18-Jan-2018 03:00:00, NaN  
18-Jan-2018 04:00:00, NaN  
18-Jan-2018 05:00:00, NaN

18-Jan-2018 06:00:00, NaN  
18-Jan-2018 07:00:00, NaN  
18-Jan-2018 08:00:00, NaN  
18-Jan-2018 09:00:00, NaN  
18-Jan-2018 10:00:00, NaN  
18-Jan-2018 11:00:00, NaN  
18-Jan-2018 12:00:00, NaN  
18-Jan-2018 13:00:00, NaN  
18-Jan-2018 14:00:00, NaN  
18-Jan-2018 15:00:00, NaN  
18-Jan-2018 16:00:00, NaN  
18-Jan-2018 17:00:00, NaN  
18-Jan-2018 18:00:00, NaN  
18-Jan-2018 19:00:00, NaN  
18-Jan-2018 20:00:00, NaN  
18-Jan-2018 21:00:00, NaN  
18-Jan-2018 22:00:00, NaN  
18-Jan-2018 23:00:00, NaN  
19-Jan-2018, NaN  
19-Jan-2018 01:00:00, NaN  
19-Jan-2018 02:00:00, NaN  
19-Jan-2018 03:00:00, NaN  
19-Jan-2018 04:00:00, NaN  
19-Jan-2018 05:00:00, NaN  
19-Jan-2018 06:00:00, NaN  
19-Jan-2018 07:00:00, NaN  
19-Jan-2018 08:00:00, NaN  
19-Jan-2018 09:00:00, NaN  
19-Jan-2018 10:00:00, NaN  
19-Jan-2018 11:00:00, NaN  
19-Jan-2018 12:00:00, NaN  
19-Jan-2018 13:00:00, NaN  
19-Jan-2018 14:00:00, NaN  
19-Jan-2018 15:00:00, NaN  
19-Jan-2018 16:00:00, NaN  
19-Jan-2018 17:00:00, NaN  
19-Jan-2018 18:00:00, NaN  
19-Jan-2018 19:00:00, NaN  
19-Jan-2018 20:00:00, NaN  
19-Jan-2018 21:00:00, NaN  
19-Jan-2018 22:00:00, NaN  
19-Jan-2018 23:00:00, NaN  
20-Jan-2018, NaN  
20-Jan-2018 01:00:00, NaN  
20-Jan-2018 02:00:00, NaN  
20-Jan-2018 03:00:00, NaN  
20-Jan-2018 04:00:00, NaN  
20-Jan-2018 05:00:00, NaN  
20-Jan-2018 06:00:00, NaN  
20-Jan-2018 07:00:00, NaN  
20-Jan-2018 08:00:00, NaN  
20-Jan-2018 09:00:00, NaN  
20-Jan-2018 10:00:00, NaN  
20-Jan-2018 11:00:00, NaN  
20-Jan-2018 12:00:00, NaN  
20-Jan-2018 13:00:00, NaN  
20-Jan-2018 14:00:00, NaN  
20-Jan-2018 15:00:00, NaN  
20-Jan-2018 16:00:00, NaN  
20-Jan-2018 17:00:00, NaN  
20-Jan-2018 18:00:00, NaN  
20-Jan-2018 19:00:00, NaN  
20-Jan-2018 20:00:00, NaN  
20-Jan-2018 21:00:00, NaN

20-Jan-2018 22:00:00, NaN  
20-Jan-2018 23:00:00, NaN  
21-Jan-2018, NaN  
21-Jan-2018 01:00:00, NaN  
21-Jan-2018 02:00:00, NaN  
21-Jan-2018 03:00:00, NaN  
21-Jan-2018 04:00:00, NaN  
21-Jan-2018 05:00:00, NaN  
21-Jan-2018 06:00:00, NaN  
21-Jan-2018 07:00:00, NaN  
21-Jan-2018 08:00:00, NaN  
21-Jan-2018 09:00:00, NaN  
21-Jan-2018 10:00:00, NaN  
21-Jan-2018 11:00:00, NaN  
21-Jan-2018 12:00:00, NaN  
21-Jan-2018 13:00:00, NaN  
21-Jan-2018 14:00:00, NaN  
21-Jan-2018 15:00:00, NaN  
21-Jan-2018 16:00:00, NaN  
21-Jan-2018 17:00:00, NaN  
21-Jan-2018 18:00:00, NaN  
21-Jan-2018 19:00:00, NaN  
21-Jan-2018 20:00:00, NaN  
21-Jan-2018 21:00:00, NaN  
21-Jan-2018 22:00:00, NaN  
21-Jan-2018 23:00:00, NaN  
22-Jan-2018, NaN  
22-Jan-2018 01:00:00, NaN  
22-Jan-2018 02:00:00, NaN  
22-Jan-2018 03:00:00, NaN  
22-Jan-2018 04:00:00, NaN  
22-Jan-2018 05:00:00, NaN  
22-Jan-2018 06:00:00, NaN  
22-Jan-2018 07:00:00, NaN  
22-Jan-2018 08:00:00, NaN  
22-Jan-2018 09:00:00, NaN  
22-Jan-2018 10:00:00, NaN  
22-Jan-2018 11:00:00, NaN  
22-Jan-2018 12:00:00, NaN  
22-Jan-2018 13:00:00, NaN  
22-Jan-2018 14:00:00, NaN  
22-Jan-2018 15:00:00, NaN  
22-Jan-2018 16:00:00, NaN  
22-Jan-2018 17:00:00, NaN  
22-Jan-2018 18:00:00, NaN  
22-Jan-2018 19:00:00, NaN  
22-Jan-2018 20:00:00, NaN  
22-Jan-2018 21:00:00, NaN  
22-Jan-2018 22:00:00, NaN  
22-Jan-2018 23:00:00, NaN  
23-Jan-2018, NaN  
23-Jan-2018 01:00:00, NaN  
23-Jan-2018 02:00:00, NaN  
23-Jan-2018 03:00:00, NaN  
23-Jan-2018 04:00:00, NaN  
23-Jan-2018 05:00:00, NaN  
23-Jan-2018 06:00:00, NaN  
23-Jan-2018 07:00:00, NaN  
23-Jan-2018 08:00:00, NaN  
23-Jan-2018 09:00:00, NaN  
23-Jan-2018 10:00:00, NaN  
23-Jan-2018 11:00:00, NaN  
23-Jan-2018 12:00:00, NaN  
23-Jan-2018 13:00:00, NaN

23-Jan-2018 14:00:00, NaN  
23-Jan-2018 15:00:00, NaN  
23-Jan-2018 16:00:00, NaN  
23-Jan-2018 17:00:00, NaN  
23-Jan-2018 18:00:00, NaN  
23-Jan-2018 19:00:00, NaN  
23-Jan-2018 20:00:00, NaN  
23-Jan-2018 21:00:00, NaN  
23-Jan-2018 22:00:00, NaN  
23-Jan-2018 23:00:00, NaN  
24-Jan-2018, NaN  
24-Jan-2018 01:00:00, NaN  
24-Jan-2018 02:00:00, NaN  
24-Jan-2018 03:00:00, NaN  
24-Jan-2018 04:00:00, NaN  
24-Jan-2018 05:00:00, NaN  
24-Jan-2018 06:00:00, NaN  
24-Jan-2018 07:00:00, NaN  
24-Jan-2018 08:00:00, NaN  
24-Jan-2018 09:00:00, NaN  
24-Jan-2018 10:00:00, NaN  
24-Jan-2018 11:00:00, NaN  
24-Jan-2018 12:00:00, NaN  
24-Jan-2018 13:00:00, NaN  
24-Jan-2018 14:00:00, NaN  
24-Jan-2018 15:00:00, NaN  
24-Jan-2018 16:00:00, NaN  
24-Jan-2018 17:00:00, NaN  
24-Jan-2018 18:00:00, NaN  
24-Jan-2018 19:00:00, NaN  
24-Jan-2018 20:00:00, NaN  
24-Jan-2018 21:00:00, NaN  
24-Jan-2018 22:00:00, NaN  
24-Jan-2018 23:00:00, NaN  
25-Jan-2018, NaN  
25-Jan-2018 01:00:00, NaN  
25-Jan-2018 02:00:00, NaN  
25-Jan-2018 03:00:00, NaN  
25-Jan-2018 04:00:00, NaN  
25-Jan-2018 05:00:00, NaN  
25-Jan-2018 06:00:00, NaN  
25-Jan-2018 07:00:00, NaN  
25-Jan-2018 08:00:00, NaN  
25-Jan-2018 09:00:00, NaN  
25-Jan-2018 10:00:00, NaN  
25-Jan-2018 11:00:00, NaN  
25-Jan-2018 12:00:00, NaN  
25-Jan-2018 13:00:00, NaN  
25-Jan-2018 14:00:00, NaN  
25-Jan-2018 15:00:00, NaN  
25-Jan-2018 16:00:00, NaN  
25-Jan-2018 17:00:00, NaN  
25-Jan-2018 18:00:00, NaN  
25-Jan-2018 19:00:00, NaN  
25-Jan-2018 20:00:00, NaN  
25-Jan-2018 21:00:00, NaN  
25-Jan-2018 22:00:00, NaN  
25-Jan-2018 23:00:00, NaN  
26-Jan-2018, NaN  
26-Jan-2018 01:00:00, NaN  
26-Jan-2018 02:00:00, NaN  
26-Jan-2018 03:00:00, NaN  
26-Jan-2018 04:00:00, NaN  
26-Jan-2018 05:00:00, NaN

|              |           |     |
|--------------|-----------|-----|
| 26-Jan-2018  | 06:00:00, | NaN |
| 26-Jan-2018  | 07:00:00, | NaN |
| 26-Jan-2018  | 08:00:00, | NaN |
| 26-Jan-2018  | 09:00:00, | NaN |
| 26-Jan-2018  | 10:00:00, | NaN |
| 26-Jan-2018  | 11:00:00, | NaN |
| 26-Jan-2018  | 12:00:00, | NaN |
| 26-Jan-2018  | 13:00:00, | NaN |
| 26-Jan-2018  | 14:00:00, | NaN |
| 26-Jan-2018  | 15:00:00, | NaN |
| 26-Jan-2018  | 16:00:00, | NaN |
| 26-Jan-2018  | 17:00:00, | NaN |
| 26-Jan-2018  | 18:00:00, | NaN |
| 26-Jan-2018  | 19:00:00, | NaN |
| 26-Jan-2018  | 20:00:00, | NaN |
| 26-Jan-2018  | 21:00:00, | NaN |
| 26-Jan-2018  | 22:00:00, | NaN |
| 26-Jan-2018  | 23:00:00, | NaN |
| 27-Jan-2018, | NaN       |     |
| 27-Jan-2018  | 01:00:00, | NaN |
| 27-Jan-2018  | 02:00:00, | NaN |
| 27-Jan-2018  | 03:00:00, | NaN |
| 27-Jan-2018  | 04:00:00, | NaN |
| 27-Jan-2018  | 05:00:00, | NaN |
| 27-Jan-2018  | 06:00:00, | NaN |
| 27-Jan-2018  | 07:00:00, | NaN |
| 27-Jan-2018  | 08:00:00, | NaN |
| 27-Jan-2018  | 09:00:00, | NaN |
| 27-Jan-2018  | 10:00:00, | NaN |
| 27-Jan-2018  | 11:00:00, | NaN |
| 27-Jan-2018  | 12:00:00, | NaN |
| 27-Jan-2018  | 13:00:00, | NaN |
| 27-Jan-2018  | 14:00:00, | NaN |
| 27-Jan-2018  | 15:00:00, | NaN |
| 27-Jan-2018  | 16:00:00, | NaN |
| 27-Jan-2018  | 17:00:00, | NaN |
| 27-Jan-2018  | 18:00:00, | NaN |
| 27-Jan-2018  | 19:00:00, | NaN |
| 27-Jan-2018  | 20:00:00, | NaN |
| 27-Jan-2018  | 21:00:00, | NaN |
| 27-Jan-2018  | 22:00:00, | NaN |
| 27-Jan-2018  | 23:00:00, | NaN |
| 28-Jan-2018, | NaN       |     |
| 28-Jan-2018  | 01:00:00, | NaN |
| 28-Jan-2018  | 02:00:00, | NaN |
| 28-Jan-2018  | 03:00:00, | NaN |
| 28-Jan-2018  | 04:00:00, | NaN |
| 28-Jan-2018  | 05:00:00, | NaN |
| 28-Jan-2018  | 06:00:00, | NaN |
| 28-Jan-2018  | 07:00:00, | NaN |
| 28-Jan-2018  | 08:00:00, | NaN |
| 28-Jan-2018  | 09:00:00, | NaN |
| 28-Jan-2018  | 10:00:00, | NaN |
| 28-Jan-2018  | 11:00:00, | NaN |
| 28-Jan-2018  | 12:00:00, | NaN |
| 28-Jan-2018  | 13:00:00, | NaN |
| 28-Jan-2018  | 14:00:00, | NaN |
| 28-Jan-2018  | 15:00:00, | NaN |
| 28-Jan-2018  | 16:00:00, | NaN |
| 28-Jan-2018  | 17:00:00, | NaN |
| 28-Jan-2018  | 18:00:00, | NaN |
| 28-Jan-2018  | 19:00:00, | NaN |
| 28-Jan-2018  | 20:00:00, | NaN |
| 28-Jan-2018  | 21:00:00, | NaN |

28-Jan-2018 22:00:00, NaN  
28-Jan-2018 23:00:00, NaN  
29-Jan-2018, NaN  
29-Jan-2018 01:00:00, NaN  
29-Jan-2018 02:00:00, NaN  
29-Jan-2018 03:00:00, NaN  
29-Jan-2018 04:00:00, NaN  
29-Jan-2018 05:00:00, NaN  
29-Jan-2018 06:00:00, NaN  
29-Jan-2018 07:00:00, NaN  
29-Jan-2018 08:00:00, NaN  
29-Jan-2018 09:00:00, NaN  
29-Jan-2018 10:00:00, NaN  
29-Jan-2018 11:00:00, NaN  
29-Jan-2018 12:00:00, NaN  
29-Jan-2018 13:00:00, NaN  
29-Jan-2018 14:00:00, NaN  
29-Jan-2018 15:00:00, NaN  
29-Jan-2018 16:00:00, NaN  
29-Jan-2018 17:00:00, NaN  
29-Jan-2018 18:00:00, NaN  
29-Jan-2018 19:00:00, NaN  
29-Jan-2018 20:00:00, NaN  
29-Jan-2018 21:00:00, NaN  
29-Jan-2018 22:00:00, NaN  
29-Jan-2018 23:00:00, NaN  
30-Jan-2018, NaN  
30-Jan-2018 01:00:00, NaN  
30-Jan-2018 02:00:00, NaN  
30-Jan-2018 03:00:00, NaN  
30-Jan-2018 04:00:00, NaN  
30-Jan-2018 05:00:00, NaN  
30-Jan-2018 06:00:00, NaN  
30-Jan-2018 07:00:00, NaN  
30-Jan-2018 08:00:00, NaN  
30-Jan-2018 09:00:00, NaN  
30-Jan-2018 10:00:00, NaN  
30-Jan-2018 11:00:00, NaN  
30-Jan-2018 12:00:00, NaN  
30-Jan-2018 13:00:00, NaN  
30-Jan-2018 14:00:00, NaN  
30-Jan-2018 15:00:00, NaN  
30-Jan-2018 16:00:00, NaN  
30-Jan-2018 17:00:00, NaN  
30-Jan-2018 18:00:00, NaN  
30-Jan-2018 19:00:00, NaN  
30-Jan-2018 20:00:00, NaN  
30-Jan-2018 21:00:00, NaN  
30-Jan-2018 22:00:00, NaN  
30-Jan-2018 23:00:00, NaN  
31-Jan-2018, NaN  
31-Jan-2018 01:00:00, NaN  
31-Jan-2018 02:00:00, NaN  
31-Jan-2018 03:00:00, NaN  
31-Jan-2018 04:00:00, NaN  
31-Jan-2018 05:00:00, NaN  
31-Jan-2018 06:00:00, NaN  
31-Jan-2018 07:00:00, NaN  
31-Jan-2018 08:00:00, NaN  
31-Jan-2018 09:00:00, NaN  
31-Jan-2018 10:00:00, NaN  
31-Jan-2018 11:00:00, NaN  
31-Jan-2018 12:00:00, NaN  
31-Jan-2018 13:00:00, NaN

31-Jan-2018 14:00:00, NaN  
31-Jan-2018 15:00:00, NaN  
31-Jan-2018 16:00:00, NaN  
31-Jan-2018 17:00:00, NaN  
31-Jan-2018 18:00:00, NaN  
31-Jan-2018 19:00:00, NaN  
31-Jan-2018 20:00:00, NaN  
31-Jan-2018 21:00:00, NaN  
31-Jan-2018 22:00:00, NaN  
31-Jan-2018 23:00:00, NaN  
01-Feb-2018, NaN  
01-Feb-2018 01:00:00, NaN  
01-Feb-2018 02:00:00, NaN  
01-Feb-2018 03:00:00, NaN  
01-Feb-2018 04:00:00, NaN  
01-Feb-2018 05:00:00, NaN  
01-Feb-2018 06:00:00, NaN  
01-Feb-2018 07:00:00, NaN  
01-Feb-2018 08:00:00, NaN  
01-Feb-2018 09:00:00, NaN  
01-Feb-2018 10:00:00, NaN  
01-Feb-2018 11:00:00, NaN  
01-Feb-2018 12:00:00, NaN  
01-Feb-2018 13:00:00, NaN  
01-Feb-2018 14:00:00, NaN  
01-Feb-2018 15:00:00, NaN  
01-Feb-2018 16:00:00, NaN  
01-Feb-2018 17:00:00, NaN  
01-Feb-2018 18:00:00, NaN  
01-Feb-2018 19:00:00, NaN  
01-Feb-2018 20:00:00, NaN  
01-Feb-2018 21:00:00, NaN  
01-Feb-2018 22:00:00, NaN  
01-Feb-2018 23:00:00, NaN  
02-Feb-2018, NaN  
02-Feb-2018 01:00:00, NaN  
02-Feb-2018 02:00:00, NaN  
02-Feb-2018 03:00:00, NaN  
02-Feb-2018 04:00:00, NaN  
02-Feb-2018 05:00:00, NaN  
02-Feb-2018 06:00:00, NaN  
02-Feb-2018 07:00:00, NaN  
02-Feb-2018 08:00:00, NaN  
02-Feb-2018 09:00:00, NaN  
02-Feb-2018 10:00:00, NaN  
02-Feb-2018 11:00:00, NaN  
02-Feb-2018 12:00:00, NaN  
02-Feb-2018 13:00:00, NaN  
02-Feb-2018 14:00:00, NaN  
02-Feb-2018 15:00:00, NaN  
02-Feb-2018 16:00:00, NaN  
02-Feb-2018 17:00:00, NaN  
02-Feb-2018 18:00:00, NaN  
02-Feb-2018 19:00:00, NaN  
02-Feb-2018 20:00:00, NaN  
02-Feb-2018 21:00:00, NaN  
02-Feb-2018 22:00:00, NaN  
02-Feb-2018 23:00:00, NaN  
03-Feb-2018, NaN  
03-Feb-2018 01:00:00, NaN  
03-Feb-2018 02:00:00, NaN  
03-Feb-2018 03:00:00, NaN  
03-Feb-2018 04:00:00, NaN  
03-Feb-2018 05:00:00, NaN



03-Feb-2018 06:00:00, NaN  
03-Feb-2018 07:00:00, NaN  
03-Feb-2018 08:00:00, NaN  
03-Feb-2018 09:00:00, NaN  
03-Feb-2018 10:00:00, NaN  
03-Feb-2018 11:00:00, NaN  
03-Feb-2018 12:00:00, NaN  
03-Feb-2018 13:00:00, NaN  
03-Feb-2018 14:00:00, NaN  
03-Feb-2018 15:00:00, NaN  
03-Feb-2018 16:00:00, NaN  
03-Feb-2018 17:00:00, NaN  
03-Feb-2018 18:00:00, NaN  
03-Feb-2018 19:00:00, NaN  
03-Feb-2018 20:00:00, NaN  
03-Feb-2018 21:00:00, NaN  
03-Feb-2018 22:00:00, NaN  
03-Feb-2018 23:00:00, NaN  
04-Feb-2018, NaN  
04-Feb-2018 01:00:00, NaN  
04-Feb-2018 02:00:00, NaN  
04-Feb-2018 03:00:00, NaN  
04-Feb-2018 04:00:00, NaN  
04-Feb-2018 05:00:00, NaN  
04-Feb-2018 06:00:00, NaN  
04-Feb-2018 07:00:00, NaN  
04-Feb-2018 08:00:00, NaN  
04-Feb-2018 09:00:00, NaN  
04-Feb-2018 10:00:00, NaN  
04-Feb-2018 11:00:00, NaN  
04-Feb-2018 12:00:00, NaN  
04-Feb-2018 13:00:00, NaN  
04-Feb-2018 14:00:00, NaN  
04-Feb-2018 15:00:00, NaN  
04-Feb-2018 16:00:00, NaN  
04-Feb-2018 17:00:00, NaN  
04-Feb-2018 18:00:00, NaN  
04-Feb-2018 19:00:00, NaN  
04-Feb-2018 20:00:00, NaN  
04-Feb-2018 21:00:00, NaN  
04-Feb-2018 22:00:00, NaN  
04-Feb-2018 23:00:00, NaN  
05-Feb-2018, NaN  
05-Feb-2018 01:00:00, NaN  
05-Feb-2018 02:00:00, NaN  
05-Feb-2018 03:00:00, NaN  
05-Feb-2018 04:00:00, NaN  
05-Feb-2018 05:00:00, NaN  
05-Feb-2018 06:00:00, NaN  
05-Feb-2018 07:00:00, NaN  
05-Feb-2018 08:00:00, NaN  
05-Feb-2018 09:00:00, NaN  
05-Feb-2018 10:00:00, NaN  
05-Feb-2018 11:00:00, NaN  
05-Feb-2018 12:00:00, NaN  
05-Feb-2018 13:00:00, NaN  
05-Feb-2018 14:00:00, NaN  
05-Feb-2018 15:00:00, NaN  
05-Feb-2018 16:00:00, NaN  
05-Feb-2018 17:00:00, NaN  
05-Feb-2018 18:00:00, NaN  
05-Feb-2018 19:00:00, NaN  
05-Feb-2018 20:00:00, NaN  
05-Feb-2018 21:00:00, NaN

05-Feb-2018 22:00:00, NaN  
05-Feb-2018 23:00:00, NaN  
06-Feb-2018, NaN  
06-Feb-2018 01:00:00, NaN  
06-Feb-2018 02:00:00, NaN  
06-Feb-2018 03:00:00, NaN  
06-Feb-2018 04:00:00, NaN  
06-Feb-2018 05:00:00, NaN  
06-Feb-2018 06:00:00, NaN  
06-Feb-2018 07:00:00, NaN  
06-Feb-2018 08:00:00, NaN  
06-Feb-2018 09:00:00, NaN  
06-Feb-2018 10:00:00, NaN  
06-Feb-2018 11:00:00, NaN  
06-Feb-2018 12:00:00, NaN  
06-Feb-2018 13:00:00, NaN  
06-Feb-2018 14:00:00, NaN  
06-Feb-2018 15:00:00, NaN  
06-Feb-2018 16:00:00, NaN  
06-Feb-2018 17:00:00, NaN  
06-Feb-2018 18:00:00, NaN  
06-Feb-2018 19:00:00, NaN  
06-Feb-2018 20:00:00, NaN  
06-Feb-2018 21:00:00, NaN  
06-Feb-2018 22:00:00, NaN  
06-Feb-2018 23:00:00, NaN  
07-Feb-2018, NaN  
07-Feb-2018 01:00:00, NaN  
07-Feb-2018 02:00:00, NaN  
07-Feb-2018 03:00:00, NaN  
07-Feb-2018 04:00:00, NaN  
07-Feb-2018 05:00:00, NaN  
07-Feb-2018 06:00:00, NaN  
07-Feb-2018 07:00:00, NaN  
07-Feb-2018 08:00:00, NaN  
07-Feb-2018 09:00:00, NaN  
07-Feb-2018 10:00:00, NaN  
07-Feb-2018 11:00:00, NaN  
07-Feb-2018 12:00:00, NaN  
07-Feb-2018 13:00:00, NaN  
07-Feb-2018 14:00:00, NaN  
07-Feb-2018 15:00:00, NaN  
07-Feb-2018 16:00:00, NaN  
07-Feb-2018 17:00:00, NaN  
07-Feb-2018 18:00:00, NaN  
07-Feb-2018 19:00:00, NaN  
07-Feb-2018 20:00:00, NaN  
07-Feb-2018 21:00:00, NaN  
07-Feb-2018 22:00:00, NaN  
07-Feb-2018 23:00:00, NaN  
08-Feb-2018, NaN  
08-Feb-2018 01:00:00, NaN  
08-Feb-2018 02:00:00, NaN  
08-Feb-2018 03:00:00, NaN  
08-Feb-2018 04:00:00, NaN  
08-Feb-2018 05:00:00, NaN  
08-Feb-2018 06:00:00, NaN  
08-Feb-2018 07:00:00, NaN  
08-Feb-2018 08:00:00, NaN  
08-Feb-2018 09:00:00, NaN  
08-Feb-2018 10:00:00, NaN  
08-Feb-2018 11:00:00, NaN  
08-Feb-2018 12:00:00, NaN  
08-Feb-2018 13:00:00, NaN

08-Feb-2018 14:00:00, NaN  
08-Feb-2018 15:00:00, NaN  
08-Feb-2018 16:00:00, NaN  
08-Feb-2018 17:00:00, NaN  
08-Feb-2018 18:00:00, NaN  
08-Feb-2018 19:00:00, NaN  
08-Feb-2018 20:00:00, NaN  
08-Feb-2018 21:00:00, NaN  
08-Feb-2018 22:00:00, NaN  
08-Feb-2018 23:00:00, NaN  
09-Feb-2018, NaN  
09-Feb-2018 01:00:00, NaN  
09-Feb-2018 02:00:00, NaN  
09-Feb-2018 03:00:00, NaN  
09-Feb-2018 04:00:00, NaN  
09-Feb-2018 05:00:00, NaN  
09-Feb-2018 06:00:00, NaN  
09-Feb-2018 07:00:00, NaN  
09-Feb-2018 08:00:00, NaN  
09-Feb-2018 09:00:00, NaN  
09-Feb-2018 10:00:00, NaN  
09-Feb-2018 11:00:00, NaN  
09-Feb-2018 12:00:00, NaN  
09-Feb-2018 13:00:00, NaN  
09-Feb-2018 14:00:00, NaN  
09-Feb-2018 15:00:00, NaN  
09-Feb-2018 16:00:00, NaN  
09-Feb-2018 17:00:00, NaN  
09-Feb-2018 18:00:00, NaN  
09-Feb-2018 19:00:00, NaN  
09-Feb-2018 20:00:00, NaN  
09-Feb-2018 21:00:00, NaN  
09-Feb-2018 22:00:00, NaN  
09-Feb-2018 23:00:00, NaN  
10-Feb-2018, NaN  
10-Feb-2018 01:00:00, NaN  
10-Feb-2018 02:00:00, NaN  
10-Feb-2018 03:00:00, NaN  
10-Feb-2018 04:00:00, NaN  
10-Feb-2018 05:00:00, NaN  
10-Feb-2018 06:00:00, NaN  
10-Feb-2018 07:00:00, NaN  
10-Feb-2018 08:00:00, NaN  
10-Feb-2018 09:00:00, NaN  
10-Feb-2018 10:00:00, NaN  
10-Feb-2018 11:00:00, NaN  
10-Feb-2018 12:00:00, NaN  
10-Feb-2018 13:00:00, NaN  
10-Feb-2018 14:00:00, NaN  
10-Feb-2018 15:00:00, NaN  
10-Feb-2018 16:00:00, NaN  
10-Feb-2018 17:00:00, NaN  
10-Feb-2018 18:00:00, NaN  
10-Feb-2018 19:00:00, NaN  
10-Feb-2018 20:00:00, NaN  
10-Feb-2018 21:00:00, NaN  
10-Feb-2018 22:00:00, NaN  
10-Feb-2018 23:00:00, NaN  
11-Feb-2018, NaN  
11-Feb-2018 01:00:00, NaN  
11-Feb-2018 02:00:00, NaN  
11-Feb-2018 03:00:00, NaN  
11-Feb-2018 04:00:00, NaN  
11-Feb-2018 05:00:00, NaN

11-Feb-2018 06:00:00, NaN  
11-Feb-2018 07:00:00, NaN  
11-Feb-2018 08:00:00, NaN  
11-Feb-2018 09:00:00, NaN  
11-Feb-2018 10:00:00, NaN  
11-Feb-2018 11:00:00, NaN  
11-Feb-2018 12:00:00, NaN  
11-Feb-2018 13:00:00, NaN  
11-Feb-2018 14:00:00, NaN  
11-Feb-2018 15:00:00, NaN  
11-Feb-2018 16:00:00, NaN  
11-Feb-2018 17:00:00, NaN  
11-Feb-2018 18:00:00, NaN  
11-Feb-2018 19:00:00, NaN  
11-Feb-2018 20:00:00, NaN  
11-Feb-2018 21:00:00, NaN  
11-Feb-2018 22:00:00, NaN  
11-Feb-2018 23:00:00, NaN  
12-Feb-2018, NaN  
12-Feb-2018 01:00:00, NaN  
12-Feb-2018 02:00:00, NaN  
12-Feb-2018 03:00:00, NaN  
12-Feb-2018 04:00:00, NaN  
12-Feb-2018 05:00:00, NaN  
12-Feb-2018 06:00:00, NaN  
12-Feb-2018 07:00:00, NaN  
12-Feb-2018 08:00:00, NaN  
12-Feb-2018 09:00:00, NaN  
12-Feb-2018 10:00:00, NaN  
12-Feb-2018 11:00:00, NaN  
12-Feb-2018 12:00:00, NaN  
12-Feb-2018 13:00:00, NaN  
12-Feb-2018 14:00:00, NaN  
12-Feb-2018 15:00:00, NaN  
12-Feb-2018 16:00:00, NaN  
12-Feb-2018 17:00:00, NaN  
12-Feb-2018 18:00:00, NaN  
12-Feb-2018 19:00:00, NaN  
12-Feb-2018 20:00:00, NaN  
12-Feb-2018 21:00:00, NaN  
12-Feb-2018 22:00:00, NaN  
12-Feb-2018 23:00:00, NaN  
13-Feb-2018, NaN  
13-Feb-2018 01:00:00, NaN  
13-Feb-2018 02:00:00, NaN  
13-Feb-2018 03:00:00, NaN  
13-Feb-2018 04:00:00, NaN  
13-Feb-2018 05:00:00, NaN  
13-Feb-2018 06:00:00, NaN  
13-Feb-2018 07:00:00, NaN  
13-Feb-2018 08:00:00, NaN  
13-Feb-2018 09:00:00, NaN  
13-Feb-2018 10:00:00, NaN  
13-Feb-2018 11:00:00, NaN  
13-Feb-2018 12:00:00, NaN  
13-Feb-2018 13:00:00, NaN  
13-Feb-2018 14:00:00, NaN  
13-Feb-2018 15:00:00, NaN  
13-Feb-2018 16:00:00, NaN  
13-Feb-2018 17:00:00, NaN  
13-Feb-2018 18:00:00, NaN  
13-Feb-2018 19:00:00, NaN  
13-Feb-2018 20:00:00, NaN  
13-Feb-2018 21:00:00, NaN

13-Feb-2018 22:00:00, NaN  
13-Feb-2018 23:00:00, NaN  
14-Feb-2018, NaN  
14-Feb-2018 01:00:00, NaN  
14-Feb-2018 02:00:00, NaN  
14-Feb-2018 03:00:00, NaN  
14-Feb-2018 04:00:00, NaN  
14-Feb-2018 05:00:00, NaN  
14-Feb-2018 06:00:00, NaN  
14-Feb-2018 07:00:00, NaN  
14-Feb-2018 08:00:00, NaN  
14-Feb-2018 09:00:00, NaN  
14-Feb-2018 10:00:00, NaN  
14-Feb-2018 11:00:00, NaN  
14-Feb-2018 12:00:00, NaN  
14-Feb-2018 13:00:00, NaN  
14-Feb-2018 14:00:00, NaN  
14-Feb-2018 15:00:00, NaN  
14-Feb-2018 16:00:00, NaN  
14-Feb-2018 17:00:00, NaN  
14-Feb-2018 18:00:00, NaN  
14-Feb-2018 19:00:00, NaN  
14-Feb-2018 20:00:00, NaN  
14-Feb-2018 21:00:00, NaN  
14-Feb-2018 22:00:00, NaN  
14-Feb-2018 23:00:00, NaN  
15-Feb-2018, NaN  
15-Feb-2018 01:00:00, NaN  
15-Feb-2018 02:00:00, NaN  
15-Feb-2018 03:00:00, NaN  
15-Feb-2018 04:00:00, NaN  
15-Feb-2018 05:00:00, NaN  
15-Feb-2018 06:00:00, NaN  
15-Feb-2018 07:00:00, NaN  
15-Feb-2018 08:00:00, NaN  
15-Feb-2018 09:00:00, NaN  
15-Feb-2018 10:00:00, NaN  
15-Feb-2018 11:00:00, NaN  
15-Feb-2018 12:00:00, NaN  
15-Feb-2018 13:00:00, NaN  
15-Feb-2018 14:00:00, NaN  
15-Feb-2018 15:00:00, NaN  
15-Feb-2018 16:00:00, NaN  
15-Feb-2018 17:00:00, NaN  
15-Feb-2018 18:00:00, NaN  
15-Feb-2018 19:00:00, NaN  
15-Feb-2018 20:00:00, NaN  
15-Feb-2018 21:00:00, NaN  
15-Feb-2018 22:00:00, NaN  
15-Feb-2018 23:00:00, NaN  
16-Feb-2018, NaN  
16-Feb-2018 01:00:00, NaN  
16-Feb-2018 02:00:00, NaN  
16-Feb-2018 03:00:00, NaN  
16-Feb-2018 04:00:00, NaN  
16-Feb-2018 05:00:00, NaN  
16-Feb-2018 06:00:00, NaN  
16-Feb-2018 07:00:00, NaN  
16-Feb-2018 08:00:00, NaN  
16-Feb-2018 09:00:00, NaN  
16-Feb-2018 10:00:00, NaN  
16-Feb-2018 11:00:00, NaN  
16-Feb-2018 12:00:00, NaN  
16-Feb-2018 13:00:00, NaN

16-Feb-2018 14:00:00, NaN  
16-Feb-2018 15:00:00, NaN  
16-Feb-2018 16:00:00, NaN  
16-Feb-2018 17:00:00, NaN  
16-Feb-2018 18:00:00, NaN  
16-Feb-2018 19:00:00, NaN  
16-Feb-2018 20:00:00, NaN  
16-Feb-2018 21:00:00, NaN  
16-Feb-2018 22:00:00, NaN  
16-Feb-2018 23:00:00, NaN  
17-Feb-2018, NaN  
17-Feb-2018 01:00:00, NaN  
17-Feb-2018 02:00:00, NaN  
17-Feb-2018 03:00:00, NaN  
17-Feb-2018 04:00:00, NaN  
17-Feb-2018 05:00:00, NaN  
17-Feb-2018 06:00:00, NaN  
17-Feb-2018 07:00:00, NaN  
17-Feb-2018 08:00:00, NaN  
17-Feb-2018 09:00:00, NaN  
17-Feb-2018 10:00:00, NaN  
17-Feb-2018 11:00:00, NaN  
17-Feb-2018 12:00:00, NaN  
17-Feb-2018 13:00:00, NaN  
17-Feb-2018 14:00:00, NaN  
17-Feb-2018 15:00:00, NaN  
17-Feb-2018 16:00:00, NaN  
17-Feb-2018 17:00:00, NaN  
17-Feb-2018 18:00:00, NaN  
17-Feb-2018 19:00:00, NaN  
17-Feb-2018 20:00:00, NaN  
17-Feb-2018 21:00:00, NaN  
17-Feb-2018 22:00:00, NaN  
17-Feb-2018 23:00:00, NaN  
18-Feb-2018, NaN  
18-Feb-2018 01:00:00, NaN  
18-Feb-2018 02:00:00, NaN  
18-Feb-2018 03:00:00, NaN  
18-Feb-2018 04:00:00, NaN  
18-Feb-2018 05:00:00, NaN  
18-Feb-2018 06:00:00, NaN  
18-Feb-2018 07:00:00, NaN  
18-Feb-2018 08:00:00, NaN  
18-Feb-2018 09:00:00, NaN  
18-Feb-2018 10:00:00, NaN  
18-Feb-2018 11:00:00, NaN  
18-Feb-2018 12:00:00, NaN  
18-Feb-2018 13:00:00, NaN  
18-Feb-2018 14:00:00, NaN  
18-Feb-2018 15:00:00, NaN  
18-Feb-2018 16:00:00, NaN  
18-Feb-2018 17:00:00, NaN  
18-Feb-2018 18:00:00, NaN  
18-Feb-2018 19:00:00, NaN  
18-Feb-2018 20:00:00, NaN  
18-Feb-2018 21:00:00, NaN  
18-Feb-2018 22:00:00, NaN  
18-Feb-2018 23:00:00, NaN  
19-Feb-2018, NaN  
19-Feb-2018 01:00:00, NaN  
19-Feb-2018 02:00:00, NaN  
19-Feb-2018 03:00:00, NaN  
19-Feb-2018 04:00:00, NaN  
19-Feb-2018 05:00:00, NaN

19-Feb-2018 06:00:00, NaN  
19-Feb-2018 07:00:00, NaN  
19-Feb-2018 08:00:00, NaN  
19-Feb-2018 09:00:00, NaN  
19-Feb-2018 10:00:00, NaN  
19-Feb-2018 11:00:00, NaN  
19-Feb-2018 12:00:00, NaN  
19-Feb-2018 13:00:00, NaN  
19-Feb-2018 14:00:00, NaN  
19-Feb-2018 15:00:00, NaN  
19-Feb-2018 16:00:00, NaN  
19-Feb-2018 17:00:00, NaN  
19-Feb-2018 18:00:00, NaN  
19-Feb-2018 19:00:00, NaN  
19-Feb-2018 20:00:00, NaN  
19-Feb-2018 21:00:00, NaN  
19-Feb-2018 22:00:00, NaN  
19-Feb-2018 23:00:00, NaN  
20-Feb-2018, NaN  
20-Feb-2018 01:00:00, NaN  
20-Feb-2018 02:00:00, NaN  
20-Feb-2018 03:00:00, NaN  
20-Feb-2018 04:00:00, NaN  
20-Feb-2018 05:00:00, NaN  
20-Feb-2018 06:00:00, NaN  
20-Feb-2018 07:00:00, NaN  
20-Feb-2018 08:00:00, NaN  
20-Feb-2018 09:00:00, NaN  
20-Feb-2018 10:00:00, NaN  
20-Feb-2018 11:00:00, NaN  
20-Feb-2018 12:00:00, NaN  
20-Feb-2018 13:00:00, NaN  
20-Feb-2018 14:00:00, NaN  
20-Feb-2018 15:00:00, NaN  
20-Feb-2018 16:00:00, NaN  
20-Feb-2018 17:00:00, NaN  
20-Feb-2018 18:00:00, NaN  
20-Feb-2018 19:00:00, NaN  
20-Feb-2018 20:00:00, NaN  
20-Feb-2018 21:00:00, NaN  
20-Feb-2018 22:00:00, NaN  
20-Feb-2018 23:00:00, NaN  
21-Feb-2018, NaN  
21-Feb-2018 01:00:00, NaN  
21-Feb-2018 02:00:00, NaN  
21-Feb-2018 03:00:00, NaN  
21-Feb-2018 04:00:00, NaN  
21-Feb-2018 05:00:00, NaN  
21-Feb-2018 06:00:00, NaN  
21-Feb-2018 07:00:00, NaN  
21-Feb-2018 08:00:00, NaN  
21-Feb-2018 09:00:00, NaN  
21-Feb-2018 10:00:00, NaN  
21-Feb-2018 11:00:00, NaN  
21-Feb-2018 12:00:00, NaN  
21-Feb-2018 13:00:00, NaN  
21-Feb-2018 14:00:00, NaN  
21-Feb-2018 15:00:00, NaN  
21-Feb-2018 16:00:00, NaN  
21-Feb-2018 17:00:00, NaN  
21-Feb-2018 18:00:00, NaN  
21-Feb-2018 19:00:00, NaN  
21-Feb-2018 20:00:00, NaN  
21-Feb-2018 21:00:00, NaN

21-Feb-2018 22:00:00, NaN  
21-Feb-2018 23:00:00, NaN  
22-Feb-2018, NaN  
22-Feb-2018 01:00:00, NaN  
22-Feb-2018 02:00:00, NaN  
22-Feb-2018 03:00:00, NaN  
22-Feb-2018 04:00:00, NaN  
22-Feb-2018 05:00:00, NaN  
22-Feb-2018 06:00:00, NaN  
22-Feb-2018 07:00:00, NaN  
22-Feb-2018 08:00:00, NaN  
22-Feb-2018 09:00:00, NaN  
22-Feb-2018 10:00:00, NaN  
22-Feb-2018 11:00:00, NaN  
22-Feb-2018 12:00:00, NaN  
22-Feb-2018 13:00:00, NaN  
22-Feb-2018 14:00:00, NaN  
22-Feb-2018 15:00:00, NaN  
22-Feb-2018 16:00:00, NaN  
22-Feb-2018 17:00:00, NaN  
22-Feb-2018 18:00:00, NaN  
22-Feb-2018 19:00:00, NaN  
22-Feb-2018 20:00:00, NaN  
22-Feb-2018 21:00:00, NaN  
22-Feb-2018 22:00:00, NaN  
22-Feb-2018 23:00:00, NaN  
23-Feb-2018, NaN  
23-Feb-2018 01:00:00, NaN  
23-Feb-2018 02:00:00, NaN  
23-Feb-2018 03:00:00, NaN  
23-Feb-2018 04:00:00, NaN  
23-Feb-2018 05:00:00, NaN  
23-Feb-2018 06:00:00, NaN  
23-Feb-2018 07:00:00, NaN  
23-Feb-2018 08:00:00, NaN  
23-Feb-2018 09:00:00, NaN  
23-Feb-2018 10:00:00, NaN  
23-Feb-2018 11:00:00, NaN  
23-Feb-2018 12:00:00, NaN  
23-Feb-2018 13:00:00, NaN  
23-Feb-2018 14:00:00, NaN  
23-Feb-2018 15:00:00, NaN  
23-Feb-2018 16:00:00, NaN  
23-Feb-2018 17:00:00, NaN  
23-Feb-2018 18:00:00, NaN  
23-Feb-2018 19:00:00, NaN  
23-Feb-2018 20:00:00, NaN  
23-Feb-2018 21:00:00, NaN  
23-Feb-2018 22:00:00, NaN  
23-Feb-2018 23:00:00, NaN  
24-Feb-2018, NaN  
24-Feb-2018 01:00:00, NaN  
24-Feb-2018 02:00:00, NaN  
24-Feb-2018 03:00:00, NaN  
24-Feb-2018 04:00:00, NaN  
24-Feb-2018 05:00:00, NaN  
24-Feb-2018 06:00:00, NaN  
24-Feb-2018 07:00:00, NaN  
24-Feb-2018 08:00:00, NaN  
24-Feb-2018 09:00:00, NaN  
24-Feb-2018 10:00:00, NaN  
24-Feb-2018 11:00:00, NaN  
24-Feb-2018 12:00:00, NaN  
24-Feb-2018 13:00:00, NaN



24-Feb-2018 14:00:00, NaN  
24-Feb-2018 15:00:00, NaN  
24-Feb-2018 16:00:00, NaN  
24-Feb-2018 17:00:00, NaN  
24-Feb-2018 18:00:00, NaN  
24-Feb-2018 19:00:00, NaN  
24-Feb-2018 20:00:00, NaN  
24-Feb-2018 21:00:00, NaN  
24-Feb-2018 22:00:00, NaN  
24-Feb-2018 23:00:00, NaN  
25-Feb-2018, NaN  
25-Feb-2018 01:00:00, NaN  
25-Feb-2018 02:00:00, NaN  
25-Feb-2018 03:00:00, NaN  
25-Feb-2018 04:00:00, NaN  
25-Feb-2018 05:00:00, NaN  
25-Feb-2018 06:00:00, NaN  
25-Feb-2018 07:00:00, NaN  
25-Feb-2018 08:00:00, NaN  
25-Feb-2018 09:00:00, NaN  
25-Feb-2018 10:00:00, NaN  
25-Feb-2018 11:00:00, NaN  
25-Feb-2018 12:00:00, NaN  
25-Feb-2018 13:00:00, NaN  
25-Feb-2018 14:00:00, NaN  
25-Feb-2018 15:00:00, NaN  
25-Feb-2018 16:00:00, NaN  
25-Feb-2018 17:00:00, NaN  
25-Feb-2018 18:00:00, NaN  
25-Feb-2018 19:00:00, NaN  
25-Feb-2018 20:00:00, NaN  
25-Feb-2018 21:00:00, NaN  
25-Feb-2018 22:00:00, NaN  
25-Feb-2018 23:00:00, NaN  
26-Feb-2018, NaN  
26-Feb-2018 01:00:00, NaN  
26-Feb-2018 02:00:00, NaN  
26-Feb-2018 03:00:00, NaN  
26-Feb-2018 04:00:00, NaN  
26-Feb-2018 05:00:00, NaN  
26-Feb-2018 06:00:00, NaN  
26-Feb-2018 07:00:00, NaN  
26-Feb-2018 08:00:00, NaN  
26-Feb-2018 09:00:00, NaN  
26-Feb-2018 10:00:00, NaN  
26-Feb-2018 11:00:00, NaN  
26-Feb-2018 12:00:00, NaN  
26-Feb-2018 13:00:00, NaN  
26-Feb-2018 14:00:00, NaN  
26-Feb-2018 15:00:00, NaN  
26-Feb-2018 16:00:00, NaN  
26-Feb-2018 17:00:00, NaN  
26-Feb-2018 18:00:00, NaN  
26-Feb-2018 19:00:00, NaN  
26-Feb-2018 20:00:00, NaN  
26-Feb-2018 21:00:00, NaN  
26-Feb-2018 22:00:00, NaN  
26-Feb-2018 23:00:00, NaN  
27-Feb-2018, NaN  
27-Feb-2018 01:00:00, NaN  
27-Feb-2018 02:00:00, NaN  
27-Feb-2018 03:00:00, NaN  
27-Feb-2018 04:00:00, NaN  
27-Feb-2018 05:00:00, NaN

27-Feb-2018 06:00:00, NaN  
27-Feb-2018 07:00:00, NaN  
27-Feb-2018 08:00:00, NaN  
27-Feb-2018 09:00:00, NaN  
27-Feb-2018 10:00:00, NaN  
27-Feb-2018 11:00:00, NaN  
27-Feb-2018 12:00:00, NaN  
27-Feb-2018 13:00:00, NaN  
27-Feb-2018 14:00:00, NaN  
27-Feb-2018 15:00:00, NaN  
27-Feb-2018 16:00:00, NaN  
27-Feb-2018 17:00:00, NaN  
27-Feb-2018 18:00:00, NaN  
27-Feb-2018 19:00:00, NaN  
27-Feb-2018 20:00:00, NaN  
27-Feb-2018 21:00:00, NaN  
27-Feb-2018 22:00:00, NaN  
27-Feb-2018 23:00:00, NaN  
28-Feb-2018, NaN  
28-Feb-2018 01:00:00, NaN  
28-Feb-2018 02:00:00, NaN  
28-Feb-2018 03:00:00, NaN  
28-Feb-2018 04:00:00, NaN  
28-Feb-2018 05:00:00, NaN  
28-Feb-2018 06:00:00, NaN  
28-Feb-2018 07:00:00, NaN  
28-Feb-2018 08:00:00, NaN  
28-Feb-2018 09:00:00, NaN  
28-Feb-2018 10:00:00, NaN  
28-Feb-2018 11:00:00, NaN  
28-Feb-2018 12:00:00, NaN  
28-Feb-2018 13:00:00, NaN  
28-Feb-2018 14:00:00, NaN  
28-Feb-2018 15:00:00, NaN  
28-Feb-2018 16:00:00, NaN  
28-Feb-2018 17:00:00, NaN  
28-Feb-2018 18:00:00, NaN  
28-Feb-2018 19:00:00, NaN  
28-Feb-2018 20:00:00, NaN  
28-Feb-2018 21:00:00, NaN  
28-Feb-2018 22:00:00, NaN  
28-Feb-2018 23:00:00, NaN  
01-Mar-2018, NaN  
01-Mar-2018 01:00:00, NaN  
01-Mar-2018 02:00:00, NaN  
01-Mar-2018 03:00:00, NaN  
01-Mar-2018 04:00:00, NaN  
01-Mar-2018 05:00:00, NaN  
01-Mar-2018 06:00:00, NaN  
01-Mar-2018 07:00:00, NaN  
01-Mar-2018 08:00:00, NaN  
01-Mar-2018 09:00:00, NaN  
01-Mar-2018 10:00:00, NaN  
01-Mar-2018 11:00:00, NaN  
01-Mar-2018 12:00:00, NaN  
01-Mar-2018 13:00:00, NaN  
01-Mar-2018 14:00:00, NaN  
01-Mar-2018 15:00:00, NaN  
01-Mar-2018 16:00:00, NaN  
01-Mar-2018 17:00:00, NaN  
01-Mar-2018 18:00:00, NaN  
01-Mar-2018 19:00:00, NaN  
01-Mar-2018 20:00:00, NaN  
01-Mar-2018 21:00:00, NaN

01-Mar-2018 22:00:00, NaN  
01-Mar-2018 23:00:00, NaN  
02-Mar-2018, NaN  
02-Mar-2018 01:00:00, NaN  
02-Mar-2018 02:00:00, NaN  
02-Mar-2018 03:00:00, NaN  
02-Mar-2018 04:00:00, NaN  
02-Mar-2018 05:00:00, NaN  
02-Mar-2018 06:00:00, NaN  
02-Mar-2018 07:00:00, NaN  
02-Mar-2018 08:00:00, NaN  
02-Mar-2018 09:00:00, NaN  
02-Mar-2018 10:00:00, NaN  
02-Mar-2018 11:00:00, NaN  
02-Mar-2018 12:00:00, NaN  
02-Mar-2018 13:00:00, NaN  
02-Mar-2018 14:00:00, NaN  
02-Mar-2018 15:00:00, NaN  
02-Mar-2018 16:00:00, NaN  
02-Mar-2018 17:00:00, NaN  
02-Mar-2018 18:00:00, NaN  
02-Mar-2018 19:00:00, NaN  
02-Mar-2018 20:00:00, NaN  
02-Mar-2018 21:00:00, NaN  
02-Mar-2018 22:00:00, NaN  
02-Mar-2018 23:00:00, NaN  
03-Mar-2018, NaN  
03-Mar-2018 01:00:00, NaN  
03-Mar-2018 02:00:00, NaN  
03-Mar-2018 03:00:00, NaN  
03-Mar-2018 04:00:00, NaN  
03-Mar-2018 05:00:00, NaN  
03-Mar-2018 06:00:00, NaN  
03-Mar-2018 07:00:00, NaN  
03-Mar-2018 08:00:00, NaN  
03-Mar-2018 09:00:00, NaN  
03-Mar-2018 10:00:00, NaN  
03-Mar-2018 11:00:00, NaN  
03-Mar-2018 12:00:00, NaN  
03-Mar-2018 13:00:00, NaN  
03-Mar-2018 14:00:00, NaN  
03-Mar-2018 15:00:00, NaN  
03-Mar-2018 16:00:00, NaN  
03-Mar-2018 17:00:00, NaN  
03-Mar-2018 18:00:00, NaN  
03-Mar-2018 19:00:00, NaN  
03-Mar-2018 20:00:00, NaN  
03-Mar-2018 21:00:00, NaN  
03-Mar-2018 22:00:00, NaN  
03-Mar-2018 23:00:00, NaN  
04-Mar-2018, NaN  
04-Mar-2018 01:00:00, NaN  
04-Mar-2018 02:00:00, NaN  
04-Mar-2018 03:00:00, NaN  
04-Mar-2018 04:00:00, NaN  
04-Mar-2018 05:00:00, NaN  
04-Mar-2018 06:00:00, NaN  
04-Mar-2018 07:00:00, NaN  
04-Mar-2018 08:00:00, NaN  
04-Mar-2018 09:00:00, NaN  
04-Mar-2018 10:00:00, NaN  
04-Mar-2018 11:00:00, NaN  
04-Mar-2018 12:00:00, NaN  
04-Mar-2018 13:00:00, NaN

04-Mar-2018 14:00:00, NaN  
04-Mar-2018 15:00:00, NaN  
04-Mar-2018 16:00:00, NaN  
04-Mar-2018 17:00:00, NaN  
04-Mar-2018 18:00:00, NaN  
04-Mar-2018 19:00:00, NaN  
04-Mar-2018 20:00:00, NaN  
04-Mar-2018 21:00:00, NaN  
04-Mar-2018 22:00:00, NaN  
04-Mar-2018 23:00:00, NaN  
05-Mar-2018, NaN  
05-Mar-2018 01:00:00, NaN  
05-Mar-2018 02:00:00, NaN  
05-Mar-2018 03:00:00, NaN  
05-Mar-2018 04:00:00, NaN  
05-Mar-2018 05:00:00, NaN  
05-Mar-2018 06:00:00, NaN  
05-Mar-2018 07:00:00, NaN  
05-Mar-2018 08:00:00, NaN  
05-Mar-2018 09:00:00, NaN  
05-Mar-2018 10:00:00, NaN  
05-Mar-2018 11:00:00, NaN  
05-Mar-2018 12:00:00, NaN  
05-Mar-2018 13:00:00, NaN  
05-Mar-2018 14:00:00, NaN  
05-Mar-2018 15:00:00, NaN  
05-Mar-2018 16:00:00, NaN  
05-Mar-2018 17:00:00, NaN  
05-Mar-2018 18:00:00, NaN  
05-Mar-2018 19:00:00, NaN  
05-Mar-2018 20:00:00, NaN  
05-Mar-2018 21:00:00, NaN  
05-Mar-2018 22:00:00, NaN  
05-Mar-2018 23:00:00, NaN  
06-Mar-2018, NaN  
06-Mar-2018 01:00:00, NaN  
06-Mar-2018 02:00:00, NaN  
06-Mar-2018 03:00:00, NaN  
06-Mar-2018 04:00:00, NaN  
06-Mar-2018 05:00:00, NaN  
06-Mar-2018 06:00:00, NaN  
06-Mar-2018 07:00:00, NaN  
06-Mar-2018 08:00:00, NaN  
06-Mar-2018 09:00:00, NaN  
06-Mar-2018 10:00:00, NaN  
06-Mar-2018 11:00:00, NaN  
06-Mar-2018 12:00:00, NaN  
06-Mar-2018 13:00:00, NaN  
06-Mar-2018 14:00:00, NaN  
06-Mar-2018 15:00:00, NaN  
06-Mar-2018 16:00:00, NaN  
06-Mar-2018 17:00:00, NaN  
06-Mar-2018 18:00:00, NaN  
06-Mar-2018 19:00:00, NaN  
06-Mar-2018 20:00:00, NaN  
06-Mar-2018 21:00:00, NaN  
06-Mar-2018 22:00:00, NaN  
06-Mar-2018 23:00:00, NaN  
07-Mar-2018, NaN  
07-Mar-2018 01:00:00, NaN  
07-Mar-2018 02:00:00, NaN  
07-Mar-2018 03:00:00, NaN  
07-Mar-2018 04:00:00, NaN  
07-Mar-2018 05:00:00, NaN

07-Mar-2018 06:00:00, NaN  
07-Mar-2018 07:00:00, NaN  
07-Mar-2018 08:00:00, NaN  
07-Mar-2018 09:00:00, NaN  
07-Mar-2018 10:00:00, NaN  
07-Mar-2018 11:00:00, NaN  
07-Mar-2018 12:00:00, NaN  
07-Mar-2018 13:00:00, NaN  
07-Mar-2018 14:00:00, NaN  
07-Mar-2018 15:00:00, NaN  
07-Mar-2018 16:00:00, NaN  
07-Mar-2018 17:00:00, NaN  
07-Mar-2018 18:00:00, NaN  
07-Mar-2018 19:00:00, NaN  
07-Mar-2018 20:00:00, NaN  
07-Mar-2018 21:00:00, NaN  
07-Mar-2018 22:00:00, NaN  
07-Mar-2018 23:00:00, NaN  
08-Mar-2018, NaN  
08-Mar-2018 01:00:00, NaN  
08-Mar-2018 02:00:00, NaN  
08-Mar-2018 03:00:00, NaN  
08-Mar-2018 04:00:00, NaN  
08-Mar-2018 05:00:00, NaN  
08-Mar-2018 06:00:00, NaN  
08-Mar-2018 07:00:00, NaN  
08-Mar-2018 08:00:00, NaN  
08-Mar-2018 09:00:00, NaN  
08-Mar-2018 10:00:00, NaN  
08-Mar-2018 11:00:00, NaN  
08-Mar-2018 12:00:00, NaN  
08-Mar-2018 13:00:00, NaN  
08-Mar-2018 14:00:00, NaN  
08-Mar-2018 15:00:00, NaN  
08-Mar-2018 16:00:00, NaN  
08-Mar-2018 17:00:00, NaN  
08-Mar-2018 18:00:00, NaN  
08-Mar-2018 19:00:00, NaN  
08-Mar-2018 20:00:00, NaN  
08-Mar-2018 21:00:00, NaN  
08-Mar-2018 22:00:00, NaN  
08-Mar-2018 23:00:00, NaN  
09-Mar-2018, NaN  
09-Mar-2018 01:00:00, NaN  
09-Mar-2018 02:00:00, NaN  
09-Mar-2018 03:00:00, NaN  
09-Mar-2018 04:00:00, NaN  
09-Mar-2018 05:00:00, NaN  
09-Mar-2018 06:00:00, NaN  
09-Mar-2018 07:00:00, NaN  
09-Mar-2018 08:00:00, NaN  
09-Mar-2018 09:00:00, NaN  
09-Mar-2018 10:00:00, NaN  
09-Mar-2018 11:00:00, NaN  
09-Mar-2018 12:00:00, NaN  
09-Mar-2018 13:00:00, NaN  
09-Mar-2018 14:00:00, NaN  
09-Mar-2018 15:00:00, NaN  
09-Mar-2018 16:00:00, NaN  
09-Mar-2018 17:00:00, NaN  
09-Mar-2018 18:00:00, NaN  
09-Mar-2018 19:00:00, NaN  
09-Mar-2018 20:00:00, NaN  
09-Mar-2018 21:00:00, NaN

09-Mar-2018 22:00:00, NaN  
09-Mar-2018 23:00:00, NaN  
10-Mar-2018, NaN  
10-Mar-2018 01:00:00, NaN  
10-Mar-2018 02:00:00, NaN  
10-Mar-2018 03:00:00, NaN  
10-Mar-2018 04:00:00, NaN  
10-Mar-2018 05:00:00, NaN  
10-Mar-2018 06:00:00, NaN  
10-Mar-2018 07:00:00, NaN  
10-Mar-2018 08:00:00, NaN  
10-Mar-2018 09:00:00, NaN  
10-Mar-2018 10:00:00, NaN  
10-Mar-2018 11:00:00, NaN  
10-Mar-2018 12:00:00, NaN  
10-Mar-2018 13:00:00, NaN  
10-Mar-2018 14:00:00, NaN  
10-Mar-2018 15:00:00, NaN  
10-Mar-2018 16:00:00, NaN  
10-Mar-2018 17:00:00, NaN  
10-Mar-2018 18:00:00, NaN  
10-Mar-2018 19:00:00, NaN  
10-Mar-2018 20:00:00, NaN  
10-Mar-2018 21:00:00, NaN  
10-Mar-2018 22:00:00, NaN  
10-Mar-2018 23:00:00, NaN  
11-Mar-2018, NaN  
11-Mar-2018 01:00:00, NaN  
11-Mar-2018 02:00:00, NaN  
11-Mar-2018 03:00:00, NaN  
11-Mar-2018 04:00:00, NaN  
11-Mar-2018 05:00:00, NaN  
11-Mar-2018 06:00:00, NaN  
11-Mar-2018 08:00:00, NaN  
11-Mar-2018 09:00:00, NaN  
11-Mar-2018 10:00:00, NaN  
11-Mar-2018 11:00:00, NaN  
11-Mar-2018 12:00:00, NaN  
11-Mar-2018 13:00:00, NaN  
11-Mar-2018 14:00:00, NaN  
11-Mar-2018 15:00:00, NaN  
11-Mar-2018 16:00:00, NaN  
11-Mar-2018 17:00:00, NaN  
11-Mar-2018 18:00:00, NaN  
11-Mar-2018 19:00:00, NaN  
11-Mar-2018 20:00:00, NaN  
11-Mar-2018 21:00:00, NaN  
11-Mar-2018 22:00:00, NaN  
11-Mar-2018 23:00:00, NaN  
12-Mar-2018, NaN  
12-Mar-2018 01:00:00, NaN  
12-Mar-2018 02:00:00, NaN  
12-Mar-2018 03:00:00, NaN  
12-Mar-2018 04:00:00, NaN  
12-Mar-2018 05:00:00, NaN  
12-Mar-2018 06:00:00, NaN  
12-Mar-2018 07:00:00, NaN  
12-Mar-2018 08:00:00, NaN  
12-Mar-2018 09:00:00, NaN  
12-Mar-2018 10:00:00, NaN  
12-Mar-2018 11:00:00, NaN  
12-Mar-2018 12:00:00, NaN  
12-Mar-2018 13:00:00, NaN  
12-Mar-2018 14:00:00, NaN

12-Mar-2018 15:00:00, NaN  
12-Mar-2018 16:00:00, NaN  
12-Mar-2018 17:00:00, NaN  
12-Mar-2018 18:00:00, NaN  
12-Mar-2018 19:00:00, NaN  
12-Mar-2018 20:00:00, NaN  
12-Mar-2018 21:00:00, NaN  
12-Mar-2018 22:00:00, NaN  
12-Mar-2018 23:00:00, NaN  
13-Mar-2018, NaN  
13-Mar-2018 01:00:00, NaN  
13-Mar-2018 02:00:00, NaN  
13-Mar-2018 03:00:00, NaN  
13-Mar-2018 04:00:00, NaN  
13-Mar-2018 05:00:00, NaN  
13-Mar-2018 06:00:00, NaN  
13-Mar-2018 07:00:00, NaN  
13-Mar-2018 08:00:00, NaN  
13-Mar-2018 09:00:00, NaN  
13-Mar-2018 10:00:00, NaN  
13-Mar-2018 11:00:00, NaN  
13-Mar-2018 12:00:00, NaN  
13-Mar-2018 13:00:00, NaN  
13-Mar-2018 14:00:00, NaN  
13-Mar-2018 15:00:00, NaN  
13-Mar-2018 16:00:00, NaN  
13-Mar-2018 17:00:00, NaN  
13-Mar-2018 18:00:00, NaN  
13-Mar-2018 19:00:00, NaN  
13-Mar-2018 20:00:00, NaN  
13-Mar-2018 21:00:00, NaN  
13-Mar-2018 22:00:00, NaN  
13-Mar-2018 23:00:00, NaN  
14-Mar-2018, NaN  
14-Mar-2018 01:00:00, NaN  
14-Mar-2018 02:00:00, NaN  
14-Mar-2018 03:00:00, NaN  
14-Mar-2018 04:00:00, NaN  
14-Mar-2018 05:00:00, NaN  
14-Mar-2018 06:00:00, NaN  
14-Mar-2018 07:00:00, NaN  
14-Mar-2018 08:00:00, NaN  
14-Mar-2018 09:00:00, NaN  
14-Mar-2018 10:00:00, NaN  
14-Mar-2018 11:00:00, NaN  
14-Mar-2018 12:00:00, NaN  
14-Mar-2018 13:00:00, NaN  
14-Mar-2018 14:00:00, NaN  
14-Mar-2018 15:00:00, NaN  
14-Mar-2018 16:00:00, NaN  
14-Mar-2018 17:00:00, NaN  
14-Mar-2018 18:00:00, NaN  
14-Mar-2018 19:00:00, NaN  
14-Mar-2018 20:00:00, NaN  
14-Mar-2018 21:00:00, NaN  
14-Mar-2018 22:00:00, NaN  
14-Mar-2018 23:00:00, NaN  
15-Mar-2018, NaN  
15-Mar-2018 01:00:00, NaN  
15-Mar-2018 02:00:00, NaN  
15-Mar-2018 03:00:00, NaN  
15-Mar-2018 04:00:00, NaN  
15-Mar-2018 05:00:00, NaN  
15-Mar-2018 06:00:00, NaN

15-Mar-2018 07:00:00, NaN  
15-Mar-2018 08:00:00, NaN  
15-Mar-2018 09:00:00, NaN  
15-Mar-2018 10:00:00, NaN  
15-Mar-2018 11:00:00, NaN  
15-Mar-2018 12:00:00, NaN  
15-Mar-2018 13:00:00, NaN  
15-Mar-2018 14:00:00, NaN  
15-Mar-2018 15:00:00, NaN  
15-Mar-2018 16:00:00, NaN  
15-Mar-2018 17:00:00, NaN  
15-Mar-2018 18:00:00, NaN  
15-Mar-2018 19:00:00, NaN  
15-Mar-2018 20:00:00, NaN  
15-Mar-2018 21:00:00, NaN  
15-Mar-2018 22:00:00, NaN  
15-Mar-2018 23:00:00, NaN  
16-Mar-2018, NaN  
16-Mar-2018 01:00:00, NaN  
16-Mar-2018 02:00:00, NaN  
16-Mar-2018 03:00:00, NaN  
16-Mar-2018 04:00:00, NaN  
16-Mar-2018 05:00:00, NaN  
16-Mar-2018 06:00:00, NaN  
16-Mar-2018 07:00:00, NaN  
16-Mar-2018 08:00:00, NaN  
16-Mar-2018 09:00:00, NaN  
16-Mar-2018 10:00:00, NaN  
16-Mar-2018 11:00:00, NaN  
16-Mar-2018 12:00:00, NaN  
16-Mar-2018 13:00:00, NaN  
16-Mar-2018 14:00:00, NaN  
16-Mar-2018 15:00:00, NaN  
16-Mar-2018 16:00:00, NaN  
16-Mar-2018 17:00:00, NaN  
16-Mar-2018 18:00:00, NaN  
16-Mar-2018 19:00:00, NaN  
16-Mar-2018 20:00:00, NaN  
16-Mar-2018 21:00:00, NaN  
16-Mar-2018 22:00:00, NaN  
16-Mar-2018 23:00:00, NaN  
17-Mar-2018, NaN  
17-Mar-2018 01:00:00, NaN  
17-Mar-2018 02:00:00, NaN  
17-Mar-2018 03:00:00, NaN  
17-Mar-2018 04:00:00, NaN  
17-Mar-2018 05:00:00, NaN  
17-Mar-2018 06:00:00, NaN  
17-Mar-2018 07:00:00, NaN  
17-Mar-2018 08:00:00, NaN  
17-Mar-2018 09:00:00, NaN  
17-Mar-2018 10:00:00, NaN  
17-Mar-2018 11:00:00, NaN  
17-Mar-2018 12:00:00, NaN  
17-Mar-2018 13:00:00, NaN  
17-Mar-2018 14:00:00, NaN  
17-Mar-2018 15:00:00, NaN  
17-Mar-2018 16:00:00, NaN  
17-Mar-2018 17:00:00, NaN  
17-Mar-2018 18:00:00, NaN  
17-Mar-2018 19:00:00, NaN  
17-Mar-2018 20:00:00, NaN  
17-Mar-2018 21:00:00, NaN  
17-Mar-2018 22:00:00, NaN



17-Mar-2018 23:00:00, NaN  
18-Mar-2018, NaN  
18-Mar-2018 01:00:00, NaN  
18-Mar-2018 02:00:00, NaN  
18-Mar-2018 03:00:00, NaN  
18-Mar-2018 04:00:00, NaN  
18-Mar-2018 05:00:00, NaN  
18-Mar-2018 06:00:00, NaN  
18-Mar-2018 07:00:00, NaN  
18-Mar-2018 08:00:00, NaN  
18-Mar-2018 09:00:00, NaN  
18-Mar-2018 10:00:00, NaN  
18-Mar-2018 11:00:00, NaN  
18-Mar-2018 12:00:00, NaN  
18-Mar-2018 13:00:00, NaN  
18-Mar-2018 14:00:00, NaN  
18-Mar-2018 15:00:00, NaN  
18-Mar-2018 16:00:00, NaN  
18-Mar-2018 17:00:00, NaN  
18-Mar-2018 18:00:00, NaN  
18-Mar-2018 19:00:00, NaN  
18-Mar-2018 20:00:00, NaN  
18-Mar-2018 21:00:00, NaN  
18-Mar-2018 22:00:00, NaN  
18-Mar-2018 23:00:00, NaN  
19-Mar-2018, NaN  
19-Mar-2018 01:00:00, NaN  
19-Mar-2018 02:00:00, NaN  
19-Mar-2018 03:00:00, NaN  
19-Mar-2018 04:00:00, NaN  
19-Mar-2018 05:00:00, NaN  
19-Mar-2018 06:00:00, NaN  
19-Mar-2018 07:00:00, NaN  
19-Mar-2018 08:00:00, NaN  
19-Mar-2018 09:00:00, NaN  
19-Mar-2018 10:00:00, NaN  
19-Mar-2018 11:00:00, NaN  
19-Mar-2018 12:00:00, NaN  
19-Mar-2018 13:00:00, NaN  
19-Mar-2018 14:00:00, NaN  
19-Mar-2018 15:00:00, NaN  
19-Mar-2018 16:00:00, NaN  
19-Mar-2018 17:00:00, NaN  
19-Mar-2018 18:00:00, NaN  
19-Mar-2018 19:00:00, NaN  
19-Mar-2018 20:00:00, NaN  
19-Mar-2018 21:00:00, NaN  
19-Mar-2018 22:00:00, NaN  
19-Mar-2018 23:00:00, NaN  
20-Mar-2018, NaN  
20-Mar-2018 01:00:00, NaN  
20-Mar-2018 02:00:00, NaN  
20-Mar-2018 03:00:00, NaN  
20-Mar-2018 04:00:00, NaN  
20-Mar-2018 05:00:00, NaN  
20-Mar-2018 06:00:00, NaN  
20-Mar-2018 07:00:00, NaN  
20-Mar-2018 08:00:00, NaN  
20-Mar-2018 09:00:00, NaN  
20-Mar-2018 10:00:00, NaN  
20-Mar-2018 11:00:00, NaN  
20-Mar-2018 12:00:00, NaN  
20-Mar-2018 13:00:00, NaN  
20-Mar-2018 14:00:00, NaN

20-Mar-2018 15:00:00, NaN  
20-Mar-2018 16:00:00, NaN  
20-Mar-2018 17:00:00, NaN  
20-Mar-2018 18:00:00, NaN  
20-Mar-2018 19:00:00, NaN  
20-Mar-2018 20:00:00, NaN  
20-Mar-2018 21:00:00, NaN  
20-Mar-2018 22:00:00, NaN  
20-Mar-2018 23:00:00, NaN  
21-Mar-2018, NaN  
21-Mar-2018 01:00:00, NaN  
21-Mar-2018 02:00:00, NaN  
21-Mar-2018 03:00:00, NaN  
21-Mar-2018 04:00:00, NaN  
21-Mar-2018 05:00:00, NaN  
21-Mar-2018 06:00:00, NaN  
21-Mar-2018 07:00:00, NaN  
21-Mar-2018 08:00:00, NaN  
21-Mar-2018 09:00:00, NaN  
21-Mar-2018 10:00:00, NaN  
21-Mar-2018 11:00:00, NaN  
21-Mar-2018 12:00:00, NaN  
21-Mar-2018 13:00:00, NaN  
21-Mar-2018 14:00:00, NaN  
21-Mar-2018 15:00:00, NaN  
21-Mar-2018 16:00:00, NaN  
21-Mar-2018 17:00:00, NaN  
21-Mar-2018 18:00:00, NaN  
21-Mar-2018 19:00:00, NaN  
21-Mar-2018 20:00:00, NaN  
21-Mar-2018 21:00:00, NaN  
21-Mar-2018 22:00:00, NaN  
21-Mar-2018 23:00:00, NaN  
22-Mar-2018, NaN  
22-Mar-2018 01:00:00, NaN  
22-Mar-2018 02:00:00, NaN  
22-Mar-2018 03:00:00, NaN  
22-Mar-2018 04:00:00, NaN  
22-Mar-2018 05:00:00, NaN  
22-Mar-2018 06:00:00, NaN  
22-Mar-2018 08:00:00, NaN  
22-Mar-2018 09:00:00, NaN  
22-Mar-2018 10:00:00, NaN  
22-Mar-2018 11:00:00, NaN  
22-Mar-2018 12:00:00, NaN  
22-Mar-2018 13:00:00, NaN  
22-Mar-2018 14:00:00, NaN  
22-Mar-2018 15:00:00, NaN  
22-Mar-2018 16:00:00, NaN  
22-Mar-2018 17:00:00, NaN  
22-Mar-2018 18:00:00, NaN  
22-Mar-2018 19:00:00, NaN  
22-Mar-2018 20:00:00, NaN  
22-Mar-2018 21:00:00, NaN  
22-Mar-2018 22:00:00, NaN  
22-Mar-2018 23:00:00, NaN  
23-Mar-2018, NaN  
23-Mar-2018 01:00:00, NaN  
23-Mar-2018 02:00:00, NaN  
23-Mar-2018 03:00:00, NaN  
23-Mar-2018 04:00:00, NaN  
23-Mar-2018 05:00:00, NaN  
23-Mar-2018 06:00:00, NaN  
23-Mar-2018 07:00:00, NaN

|              |           |     |
|--------------|-----------|-----|
| 23-Mar-2018  | 08:00:00, | NaN |
| 23-Mar-2018  | 09:00:00, | NaN |
| 23-Mar-2018  | 10:00:00, | NaN |
| 23-Mar-2018  | 11:00:00, | NaN |
| 23-Mar-2018  | 12:00:00, | NaN |
| 23-Mar-2018  | 13:00:00, | NaN |
| 23-Mar-2018  | 14:00:00, | NaN |
| 23-Mar-2018  | 15:00:00, | NaN |
| 23-Mar-2018  | 16:00:00, | NaN |
| 23-Mar-2018  | 17:00:00, | NaN |
| 23-Mar-2018  | 18:00:00, | NaN |
| 23-Mar-2018  | 19:00:00, | NaN |
| 23-Mar-2018  | 20:00:00, | NaN |
| 23-Mar-2018  | 21:00:00, | NaN |
| 23-Mar-2018  | 22:00:00, | NaN |
| 23-Mar-2018  | 23:00:00, | NaN |
| 24-Mar-2018, |           | NaN |
| 24-Mar-2018  | 01:00:00, | NaN |
| 24-Mar-2018  | 02:00:00, | NaN |
| 24-Mar-2018  | 03:00:00, | NaN |
| 24-Mar-2018  | 04:00:00, | NaN |
| 24-Mar-2018  | 05:00:00, | NaN |
| 24-Mar-2018  | 06:00:00, | NaN |
| 24-Mar-2018  | 07:00:00, | NaN |
| 24-Mar-2018  | 08:00:00, | NaN |
| 24-Mar-2018  | 09:00:00, | NaN |
| 24-Mar-2018  | 10:00:00, | NaN |
| 24-Mar-2018  | 11:00:00, | NaN |
| 24-Mar-2018  | 12:00:00, | NaN |
| 24-Mar-2018  | 13:00:00, | NaN |
| 24-Mar-2018  | 14:00:00, | NaN |
| 24-Mar-2018  | 15:00:00, | NaN |
| 24-Mar-2018  | 16:00:00, | NaN |
| 24-Mar-2018  | 17:00:00, | NaN |
| 24-Mar-2018  | 18:00:00, | NaN |
| 24-Mar-2018  | 19:00:00, | NaN |
| 24-Mar-2018  | 20:00:00, | NaN |
| 24-Mar-2018  | 21:00:00, | NaN |
| 24-Mar-2018  | 22:00:00, | NaN |
| 24-Mar-2018  | 23:00:00, | NaN |
| 25-Mar-2018, |           | NaN |
| 25-Mar-2018  | 01:00:00, | NaN |
| 25-Mar-2018  | 02:00:00, | NaN |
| 25-Mar-2018  | 03:00:00, | NaN |
| 25-Mar-2018  | 04:00:00, | NaN |
| 25-Mar-2018  | 05:00:00, | NaN |
| 25-Mar-2018  | 06:00:00, | NaN |
| 25-Mar-2018  | 07:00:00, | NaN |
| 25-Mar-2018  | 08:00:00, | NaN |
| 25-Mar-2018  | 09:00:00, | NaN |
| 25-Mar-2018  | 10:00:00, | NaN |
| 25-Mar-2018  | 11:00:00, | NaN |
| 25-Mar-2018  | 12:00:00, | NaN |
| 25-Mar-2018  | 13:00:00, | NaN |
| 25-Mar-2018  | 14:00:00, | NaN |
| 25-Mar-2018  | 15:00:00, | NaN |
| 25-Mar-2018  | 16:00:00, | NaN |
| 25-Mar-2018  | 17:00:00, | NaN |
| 25-Mar-2018  | 18:00:00, | NaN |
| 25-Mar-2018  | 19:00:00, | NaN |
| 25-Mar-2018  | 20:00:00, | NaN |
| 25-Mar-2018  | 21:00:00, | NaN |
| 25-Mar-2018  | 22:00:00, | NaN |
| 25-Mar-2018  | 23:00:00, | NaN |

26-Mar-2018, NaN  
26-Mar-2018 01:00:00, NaN  
26-Mar-2018 02:00:00, NaN  
26-Mar-2018 03:00:00, NaN  
26-Mar-2018 04:00:00, NaN  
26-Mar-2018 05:00:00, NaN  
26-Mar-2018 06:00:00, NaN  
26-Mar-2018 07:00:00, NaN  
26-Mar-2018 08:00:00, NaN  
26-Mar-2018 09:00:00, NaN  
26-Mar-2018 10:00:00, NaN  
26-Mar-2018 11:00:00, NaN  
26-Mar-2018 12:00:00, NaN  
26-Mar-2018 13:00:00, NaN  
26-Mar-2018 14:00:00, NaN  
26-Mar-2018 15:00:00, NaN  
26-Mar-2018 16:00:00, NaN  
26-Mar-2018 17:00:00, NaN  
26-Mar-2018 18:00:00, NaN  
26-Mar-2018 19:00:00, NaN  
26-Mar-2018 20:00:00, NaN  
26-Mar-2018 21:00:00, NaN  
26-Mar-2018 22:00:00, NaN  
26-Mar-2018 23:00:00, NaN  
27-Mar-2018, NaN  
27-Mar-2018 01:00:00, NaN  
27-Mar-2018 02:00:00, NaN  
27-Mar-2018 03:00:00, NaN  
27-Mar-2018 04:00:00, NaN  
27-Mar-2018 05:00:00, NaN  
27-Mar-2018 06:00:00, NaN  
27-Mar-2018 07:00:00, NaN  
27-Mar-2018 08:00:00, NaN  
27-Mar-2018 09:00:00, NaN  
27-Mar-2018 10:00:00, NaN  
27-Mar-2018 11:00:00, NaN  
27-Mar-2018 12:00:00, NaN  
27-Mar-2018 13:00:00, NaN  
27-Mar-2018 14:00:00, NaN  
27-Mar-2018 15:00:00, NaN  
27-Mar-2018 16:00:00, NaN  
27-Mar-2018 17:00:00, NaN  
27-Mar-2018 18:00:00, NaN  
27-Mar-2018 19:00:00, NaN  
27-Mar-2018 20:00:00, NaN  
27-Mar-2018 21:00:00, NaN  
27-Mar-2018 22:00:00, NaN  
27-Mar-2018 23:00:00, NaN  
28-Mar-2018, NaN  
28-Mar-2018 01:00:00, NaN  
28-Mar-2018 02:00:00, NaN  
28-Mar-2018 03:00:00, NaN  
28-Mar-2018 04:00:00, NaN  
28-Mar-2018 05:00:00, NaN  
28-Mar-2018 06:00:00, NaN  
28-Mar-2018 07:00:00, NaN  
28-Mar-2018 08:00:00, NaN  
28-Mar-2018 09:00:00, NaN  
28-Mar-2018 10:00:00, NaN  
28-Mar-2018 11:00:00, NaN  
28-Mar-2018 12:00:00, NaN  
28-Mar-2018 13:00:00, NaN  
28-Mar-2018 14:00:00, NaN  
28-Mar-2018 15:00:00, NaN

28-Mar-2018 16:00:00, NaN  
28-Mar-2018 17:00:00, NaN  
28-Mar-2018 18:00:00, NaN  
28-Mar-2018 19:00:00, NaN  
28-Mar-2018 20:00:00, NaN  
28-Mar-2018 21:00:00, NaN  
28-Mar-2018 22:00:00, NaN  
28-Mar-2018 23:00:00, NaN  
29-Mar-2018, NaN  
29-Mar-2018 01:00:00, NaN  
29-Mar-2018 02:00:00, NaN  
29-Mar-2018 03:00:00, NaN  
29-Mar-2018 04:00:00, NaN  
29-Mar-2018 05:00:00, NaN  
29-Mar-2018 06:00:00, NaN  
29-Mar-2018 07:00:00, NaN  
29-Mar-2018 08:00:00, NaN  
29-Mar-2018 09:00:00, NaN  
29-Mar-2018 10:00:00, NaN  
29-Mar-2018 11:00:00, NaN  
29-Mar-2018 12:00:00, NaN  
29-Mar-2018 13:00:00, NaN  
29-Mar-2018 14:00:00, NaN  
29-Mar-2018 15:00:00, NaN  
29-Mar-2018 16:00:00, NaN  
29-Mar-2018 17:00:00, NaN  
29-Mar-2018 18:00:00, NaN  
29-Mar-2018 19:00:00, NaN  
29-Mar-2018 20:00:00, NaN  
29-Mar-2018 21:00:00, NaN  
29-Mar-2018 22:00:00, NaN  
29-Mar-2018 23:00:00, NaN  
30-Mar-2018, NaN  
30-Mar-2018 01:00:00, NaN  
30-Mar-2018 02:00:00, NaN  
30-Mar-2018 03:00:00, NaN  
30-Mar-2018 04:00:00, NaN  
30-Mar-2018 05:00:00, NaN  
30-Mar-2018 06:00:00, NaN  
30-Mar-2018 07:00:00, NaN  
30-Mar-2018 08:00:00, NaN  
30-Mar-2018 09:00:00, NaN  
30-Mar-2018 10:00:00, NaN  
30-Mar-2018 11:00:00, NaN  
30-Mar-2018 12:00:00, NaN  
30-Mar-2018 13:00:00, NaN  
30-Mar-2018 14:00:00, NaN  
30-Mar-2018 15:00:00, NaN  
30-Mar-2018 16:00:00, NaN  
30-Mar-2018 17:00:00, NaN  
30-Mar-2018 18:00:00, NaN  
30-Mar-2018 19:00:00, NaN  
30-Mar-2018 20:00:00, NaN  
30-Mar-2018 21:00:00, NaN  
30-Mar-2018 22:00:00, NaN  
30-Mar-2018 23:00:00, NaN  
31-Mar-2018, NaN  
31-Mar-2018 01:00:00, NaN  
31-Mar-2018 02:00:00, NaN  
31-Mar-2018 03:00:00, NaN  
31-Mar-2018 04:00:00, NaN  
31-Mar-2018 05:00:00, NaN  
31-Mar-2018 06:00:00, NaN  
31-Mar-2018 07:00:00, NaN

31-Mar-2018 08:00:00, NaN  
31-Mar-2018 09:00:00, NaN  
31-Mar-2018 10:00:00, NaN  
31-Mar-2018 11:00:00, NaN  
31-Mar-2018 12:00:00, NaN  
31-Mar-2018 13:00:00, NaN  
31-Mar-2018 14:00:00, NaN  
31-Mar-2018 15:00:00, NaN  
31-Mar-2018 16:00:00, NaN  
31-Mar-2018 17:00:00, NaN  
31-Mar-2018 18:00:00, NaN  
31-Mar-2018 19:00:00, NaN  
31-Mar-2018 20:00:00, NaN  
31-Mar-2018 21:00:00, NaN  
31-Mar-2018 22:00:00, NaN  
31-Mar-2018 23:00:00, NaN  
01-Apr-2018, NaN  
01-Apr-2018 01:00:00, NaN  
01-Apr-2018 02:00:00, NaN  
01-Apr-2018 03:00:00, NaN  
01-Apr-2018 04:00:00, NaN  
01-Apr-2018 05:00:00, NaN  
01-Apr-2018 06:00:00, NaN  
01-Apr-2018 07:00:00, NaN  
01-Apr-2018 08:00:00, NaN  
01-Apr-2018 09:00:00, NaN  
01-Apr-2018 10:00:00, NaN  
01-Apr-2018 11:00:00, NaN  
01-Apr-2018 12:00:00, NaN  
01-Apr-2018 13:00:00, NaN  
01-Apr-2018 14:00:00, NaN  
01-Apr-2018 15:00:00, NaN  
01-Apr-2018 16:00:00, NaN  
01-Apr-2018 17:00:00, NaN  
01-Apr-2018 18:00:00, NaN  
01-Apr-2018 19:00:00, NaN  
01-Apr-2018 20:00:00, NaN  
01-Apr-2018 21:00:00, NaN  
01-Apr-2018 22:00:00, NaN  
01-Apr-2018 23:00:00, NaN  
02-Apr-2018, NaN  
02-Apr-2018 01:00:00, NaN  
02-Apr-2018 02:00:00, NaN  
02-Apr-2018 03:00:00, NaN  
02-Apr-2018 04:00:00, NaN  
02-Apr-2018 05:00:00, NaN  
02-Apr-2018 06:00:00, NaN  
02-Apr-2018 07:00:00, NaN  
02-Apr-2018 08:00:00, NaN  
02-Apr-2018 09:00:00, NaN  
02-Apr-2018 10:00:00, NaN  
02-Apr-2018 11:00:00, NaN  
02-Apr-2018 12:00:00, NaN  
02-Apr-2018 13:00:00, NaN  
02-Apr-2018 14:00:00, NaN  
02-Apr-2018 15:00:00, NaN  
02-Apr-2018 16:00:00, NaN  
02-Apr-2018 17:00:00, NaN  
02-Apr-2018 18:00:00, NaN  
02-Apr-2018 19:00:00, NaN  
02-Apr-2018 20:00:00, NaN  
02-Apr-2018 21:00:00, NaN  
02-Apr-2018 22:00:00, NaN  
02-Apr-2018 23:00:00, NaN

03-Apr-2018, NaN  
03-Apr-2018 01:00:00, NaN  
03-Apr-2018 02:00:00, NaN  
03-Apr-2018 03:00:00, NaN  
03-Apr-2018 04:00:00, NaN  
03-Apr-2018 05:00:00, NaN  
03-Apr-2018 06:00:00, NaN  
03-Apr-2018 07:00:00, NaN  
03-Apr-2018 08:00:00, NaN  
03-Apr-2018 09:00:00, NaN  
03-Apr-2018 10:00:00, NaN  
03-Apr-2018 11:00:00, NaN  
03-Apr-2018 12:00:00, NaN  
03-Apr-2018 13:00:00, NaN  
03-Apr-2018 14:00:00, NaN  
03-Apr-2018 15:00:00, NaN  
03-Apr-2018 16:00:00, NaN  
03-Apr-2018 17:00:00, NaN  
03-Apr-2018 18:00:00, NaN  
03-Apr-2018 19:00:00, NaN  
03-Apr-2018 20:00:00, NaN  
03-Apr-2018 21:00:00, NaN  
03-Apr-2018 22:00:00, NaN  
03-Apr-2018 23:00:00, NaN  
04-Apr-2018, NaN  
04-Apr-2018 01:00:00, NaN  
04-Apr-2018 02:00:00, NaN  
04-Apr-2018 03:00:00, NaN  
04-Apr-2018 04:00:00, NaN  
04-Apr-2018 05:00:00, NaN  
04-Apr-2018 06:00:00, NaN  
04-Apr-2018 07:00:00, NaN  
04-Apr-2018 08:00:00, NaN  
04-Apr-2018 09:00:00, NaN  
04-Apr-2018 10:00:00, NaN  
04-Apr-2018 11:00:00, NaN  
04-Apr-2018 12:00:00, NaN  
04-Apr-2018 13:00:00, NaN  
04-Apr-2018 14:00:00, NaN  
04-Apr-2018 15:00:00, NaN  
04-Apr-2018 16:00:00, NaN  
04-Apr-2018 17:00:00, NaN  
04-Apr-2018 18:00:00, NaN  
04-Apr-2018 19:00:00, NaN  
04-Apr-2018 20:00:00, NaN  
04-Apr-2018 21:00:00, NaN  
04-Apr-2018 22:00:00, NaN  
04-Apr-2018 23:00:00, NaN  
05-Apr-2018, NaN  
05-Apr-2018 01:00:00, NaN  
05-Apr-2018 02:00:00, NaN  
05-Apr-2018 03:00:00, NaN  
05-Apr-2018 04:00:00, NaN  
05-Apr-2018 05:00:00, NaN  
05-Apr-2018 06:00:00, NaN  
05-Apr-2018 07:00:00, NaN  
05-Apr-2018 08:00:00, NaN  
05-Apr-2018 09:00:00, NaN  
05-Apr-2018 10:00:00, NaN  
05-Apr-2018 11:00:00, NaN  
05-Apr-2018 12:00:00, NaN  
05-Apr-2018 13:00:00, NaN  
05-Apr-2018 14:00:00, NaN  
05-Apr-2018 15:00:00, NaN

05-Apr-2018 16:00:00, NaN  
05-Apr-2018 17:00:00, NaN  
05-Apr-2018 18:00:00, NaN  
05-Apr-2018 19:00:00, NaN  
05-Apr-2018 20:00:00, NaN  
05-Apr-2018 21:00:00, NaN  
05-Apr-2018 22:00:00, NaN  
05-Apr-2018 23:00:00, NaN  
06-Apr-2018, NaN  
06-Apr-2018 01:00:00, NaN  
06-Apr-2018 02:00:00, NaN  
06-Apr-2018 03:00:00, NaN  
06-Apr-2018 04:00:00, NaN  
06-Apr-2018 05:00:00, NaN  
06-Apr-2018 06:00:00, NaN  
06-Apr-2018 07:00:00, NaN  
06-Apr-2018 08:00:00, NaN  
06-Apr-2018 09:00:00, NaN  
06-Apr-2018 10:00:00, NaN  
06-Apr-2018 11:00:00, NaN  
06-Apr-2018 12:00:00, NaN  
06-Apr-2018 13:00:00, NaN  
06-Apr-2018 14:00:00, NaN  
06-Apr-2018 15:00:00, NaN  
06-Apr-2018 16:00:00, NaN  
06-Apr-2018 17:00:00, NaN  
06-Apr-2018 18:00:00, NaN  
06-Apr-2018 19:00:00, NaN  
06-Apr-2018 20:00:00, NaN  
06-Apr-2018 21:00:00, NaN  
06-Apr-2018 22:00:00, NaN  
06-Apr-2018 23:00:00, NaN  
07-Apr-2018, NaN  
07-Apr-2018 01:00:00, NaN  
07-Apr-2018 02:00:00, NaN  
07-Apr-2018 03:00:00, NaN  
07-Apr-2018 04:00:00, NaN  
07-Apr-2018 05:00:00, NaN  
07-Apr-2018 06:00:00, NaN  
07-Apr-2018 07:00:00, NaN  
07-Apr-2018 08:00:00, NaN  
07-Apr-2018 09:00:00, NaN  
07-Apr-2018 10:00:00, NaN  
07-Apr-2018 11:00:00, NaN  
07-Apr-2018 12:00:00, NaN  
07-Apr-2018 13:00:00, NaN  
07-Apr-2018 14:00:00, NaN  
07-Apr-2018 15:00:00, NaN  
07-Apr-2018 16:00:00, NaN  
07-Apr-2018 17:00:00, NaN  
07-Apr-2018 18:00:00, NaN  
07-Apr-2018 19:00:00, NaN  
07-Apr-2018 20:00:00, NaN  
07-Apr-2018 21:00:00, NaN  
07-Apr-2018 22:00:00, NaN  
07-Apr-2018 23:00:00, NaN  
08-Apr-2018, NaN  
08-Apr-2018 01:00:00, NaN  
08-Apr-2018 02:00:00, NaN  
08-Apr-2018 03:00:00, NaN  
08-Apr-2018 04:00:00, NaN  
08-Apr-2018 05:00:00, NaN  
08-Apr-2018 06:00:00, NaN  
08-Apr-2018 07:00:00, NaN



08-Apr-2018 08:00:00, NaN  
08-Apr-2018 09:00:00, NaN  
08-Apr-2018 10:00:00, NaN  
08-Apr-2018 11:00:00, NaN  
08-Apr-2018 12:00:00, NaN  
08-Apr-2018 13:00:00, NaN  
08-Apr-2018 14:00:00, NaN  
08-Apr-2018 15:00:00, NaN  
08-Apr-2018 16:00:00, NaN  
08-Apr-2018 17:00:00, NaN  
08-Apr-2018 18:00:00, NaN  
08-Apr-2018 19:00:00, NaN  
08-Apr-2018 20:00:00, NaN  
08-Apr-2018 21:00:00, NaN  
08-Apr-2018 22:00:00, NaN  
08-Apr-2018 23:00:00, NaN  
09-Apr-2018, NaN  
09-Apr-2018 01:00:00, NaN  
09-Apr-2018 02:00:00, NaN  
09-Apr-2018 03:00:00, NaN  
09-Apr-2018 04:00:00, NaN  
09-Apr-2018 05:00:00, NaN  
09-Apr-2018 06:00:00, NaN  
09-Apr-2018 07:00:00, NaN  
09-Apr-2018 08:00:00, NaN  
09-Apr-2018 09:00:00, NaN  
09-Apr-2018 10:00:00, NaN  
09-Apr-2018 11:00:00, NaN  
09-Apr-2018 12:00:00, NaN  
09-Apr-2018 13:00:00, NaN  
09-Apr-2018 14:00:00, NaN  
09-Apr-2018 15:00:00, NaN  
09-Apr-2018 16:00:00, NaN  
09-Apr-2018 17:00:00, NaN  
09-Apr-2018 18:00:00, NaN  
09-Apr-2018 19:00:00, NaN  
09-Apr-2018 20:00:00, NaN  
09-Apr-2018 21:00:00, NaN  
09-Apr-2018 22:00:00, NaN  
09-Apr-2018 23:00:00, NaN  
10-Apr-2018, NaN  
10-Apr-2018 01:00:00, NaN  
10-Apr-2018 02:00:00, NaN  
10-Apr-2018 03:00:00, NaN  
10-Apr-2018 04:00:00, NaN  
10-Apr-2018 05:00:00, NaN  
10-Apr-2018 06:00:00, NaN  
10-Apr-2018 07:00:00, NaN  
10-Apr-2018 08:00:00, NaN  
10-Apr-2018 09:00:00, NaN  
10-Apr-2018 10:00:00, NaN  
10-Apr-2018 11:00:00, NaN  
10-Apr-2018 12:00:00, NaN  
10-Apr-2018 13:00:00, NaN  
10-Apr-2018 14:00:00, NaN  
10-Apr-2018 15:00:00, NaN  
10-Apr-2018 16:00:00, NaN  
10-Apr-2018 17:00:00, NaN  
10-Apr-2018 18:00:00, NaN  
10-Apr-2018 19:00:00, NaN  
10-Apr-2018 20:00:00, NaN  
10-Apr-2018 21:00:00, NaN  
10-Apr-2018 22:00:00, NaN  
10-Apr-2018 23:00:00, NaN

11-Apr-2018, NaN  
11-Apr-2018 01:00:00, NaN  
11-Apr-2018 02:00:00, NaN  
11-Apr-2018 03:00:00, NaN  
11-Apr-2018 04:00:00, NaN  
11-Apr-2018 05:00:00, NaN  
11-Apr-2018 06:00:00, NaN  
11-Apr-2018 07:00:00, NaN  
11-Apr-2018 08:00:00, NaN  
11-Apr-2018 09:00:00, NaN  
11-Apr-2018 10:00:00, NaN  
11-Apr-2018 11:00:00, NaN  
11-Apr-2018 12:00:00, NaN  
11-Apr-2018 13:00:00, NaN  
11-Apr-2018 14:00:00, NaN  
11-Apr-2018 15:00:00, NaN  
11-Apr-2018 16:00:00, NaN  
11-Apr-2018 17:00:00, NaN  
11-Apr-2018 18:00:00, NaN  
11-Apr-2018 19:00:00, NaN  
11-Apr-2018 20:00:00, NaN  
11-Apr-2018 21:00:00, NaN  
11-Apr-2018 22:00:00, NaN  
11-Apr-2018 23:00:00, NaN  
12-Apr-2018, NaN  
12-Apr-2018 01:00:00, NaN  
12-Apr-2018 02:00:00, NaN  
12-Apr-2018 03:00:00, NaN  
12-Apr-2018 04:00:00, NaN  
12-Apr-2018 05:00:00, NaN  
12-Apr-2018 06:00:00, NaN  
12-Apr-2018 07:00:00, NaN  
12-Apr-2018 08:00:00, NaN  
12-Apr-2018 09:00:00, NaN  
12-Apr-2018 10:00:00, NaN  
12-Apr-2018 11:00:00, NaN  
12-Apr-2018 12:00:00, NaN  
12-Apr-2018 13:00:00, NaN  
12-Apr-2018 14:00:00, NaN  
12-Apr-2018 15:00:00, NaN  
12-Apr-2018 16:00:00, NaN  
12-Apr-2018 17:00:00, NaN  
12-Apr-2018 18:00:00, NaN  
12-Apr-2018 19:00:00, NaN  
12-Apr-2018 20:00:00, NaN  
12-Apr-2018 21:00:00, NaN  
12-Apr-2018 22:00:00, NaN  
12-Apr-2018 23:00:00, NaN  
13-Apr-2018, NaN  
13-Apr-2018 01:00:00, NaN  
13-Apr-2018 02:00:00, NaN  
13-Apr-2018 03:00:00, NaN  
13-Apr-2018 04:00:00, NaN  
13-Apr-2018 05:00:00, NaN  
13-Apr-2018 06:00:00, NaN  
13-Apr-2018 07:00:00, NaN  
13-Apr-2018 08:00:00, NaN  
13-Apr-2018 09:00:00, NaN  
13-Apr-2018 10:00:00, NaN  
13-Apr-2018 11:00:00, NaN  
13-Apr-2018 12:00:00, NaN  
13-Apr-2018 13:00:00, NaN  
13-Apr-2018 14:00:00, NaN  
13-Apr-2018 15:00:00, NaN

13-Apr-2018 16:00:00, NaN  
13-Apr-2018 17:00:00, NaN  
13-Apr-2018 18:00:00, NaN  
13-Apr-2018 19:00:00, NaN  
13-Apr-2018 20:00:00, NaN  
13-Apr-2018 21:00:00, NaN  
13-Apr-2018 22:00:00, NaN  
13-Apr-2018 23:00:00, NaN  
14-Apr-2018, NaN  
14-Apr-2018 01:00:00, NaN  
14-Apr-2018 02:00:00, NaN  
14-Apr-2018 03:00:00, NaN  
14-Apr-2018 04:00:00, NaN  
14-Apr-2018 05:00:00, NaN  
14-Apr-2018 06:00:00, NaN  
14-Apr-2018 07:00:00, NaN  
14-Apr-2018 08:00:00, NaN  
14-Apr-2018 09:00:00, NaN  
14-Apr-2018 10:00:00, NaN  
14-Apr-2018 11:00:00, NaN  
14-Apr-2018 12:00:00, NaN  
14-Apr-2018 13:00:00, NaN  
14-Apr-2018 14:00:00, NaN  
14-Apr-2018 15:00:00, NaN  
14-Apr-2018 16:00:00, NaN  
14-Apr-2018 17:00:00, NaN  
14-Apr-2018 18:00:00, NaN  
14-Apr-2018 19:00:00, NaN  
14-Apr-2018 20:00:00, NaN  
14-Apr-2018 21:00:00, NaN  
14-Apr-2018 22:00:00, NaN  
14-Apr-2018 23:00:00, NaN  
15-Apr-2018, NaN  
15-Apr-2018 01:00:00, NaN  
15-Apr-2018 02:00:00, NaN  
15-Apr-2018 03:00:00, NaN  
15-Apr-2018 04:00:00, NaN  
15-Apr-2018 05:00:00, NaN  
15-Apr-2018 06:00:00, NaN  
15-Apr-2018 07:00:00, NaN  
15-Apr-2018 08:00:00, NaN  
15-Apr-2018 09:00:00, NaN  
15-Apr-2018 10:00:00, NaN  
15-Apr-2018 11:00:00, NaN  
15-Apr-2018 12:00:00, NaN  
15-Apr-2018 13:00:00, NaN  
15-Apr-2018 14:00:00, NaN  
15-Apr-2018 15:00:00, NaN  
15-Apr-2018 16:00:00, NaN  
15-Apr-2018 17:00:00, NaN  
15-Apr-2018 18:00:00, NaN  
15-Apr-2018 19:00:00, NaN  
15-Apr-2018 20:00:00, NaN  
15-Apr-2018 21:00:00, NaN  
15-Apr-2018 22:00:00, NaN  
15-Apr-2018 23:00:00, NaN  
16-Apr-2018, NaN  
16-Apr-2018 01:00:00, NaN  
16-Apr-2018 02:00:00, NaN  
16-Apr-2018 03:00:00, NaN  
16-Apr-2018 04:00:00, NaN  
16-Apr-2018 05:00:00, NaN  
16-Apr-2018 06:00:00, NaN  
16-Apr-2018 07:00:00, NaN

16-Apr-2018 08:00:00, NaN  
16-Apr-2018 09:00:00, NaN  
16-Apr-2018 10:00:00, NaN  
16-Apr-2018 11:00:00, NaN  
16-Apr-2018 12:00:00, NaN  
16-Apr-2018 13:00:00, NaN  
16-Apr-2018 14:00:00, NaN  
16-Apr-2018 15:00:00, NaN  
16-Apr-2018 16:00:00, NaN  
16-Apr-2018 17:00:00, NaN  
16-Apr-2018 18:00:00, NaN  
16-Apr-2018 19:00:00, NaN  
16-Apr-2018 20:00:00, NaN  
16-Apr-2018 21:00:00, NaN  
16-Apr-2018 22:00:00, NaN  
16-Apr-2018 23:00:00, NaN  
17-Apr-2018, NaN  
17-Apr-2018 01:00:00, NaN  
17-Apr-2018 02:00:00, NaN  
17-Apr-2018 03:00:00, NaN  
17-Apr-2018 04:00:00, NaN  
17-Apr-2018 05:00:00, NaN  
17-Apr-2018 06:00:00, NaN  
17-Apr-2018 07:00:00, NaN  
17-Apr-2018 08:00:00, NaN  
17-Apr-2018 09:00:00, NaN  
17-Apr-2018 10:00:00, NaN  
17-Apr-2018 11:00:00, NaN  
17-Apr-2018 12:00:00, NaN  
17-Apr-2018 13:00:00, NaN  
17-Apr-2018 14:00:00, NaN  
17-Apr-2018 15:00:00, NaN  
17-Apr-2018 16:00:00, NaN  
17-Apr-2018 17:00:00, NaN  
17-Apr-2018 18:00:00, NaN  
17-Apr-2018 19:00:00, NaN  
17-Apr-2018 20:00:00, NaN  
17-Apr-2018 21:00:00, NaN  
17-Apr-2018 22:00:00, NaN  
17-Apr-2018 23:00:00, NaN  
18-Apr-2018, NaN  
18-Apr-2018 01:00:00, NaN  
18-Apr-2018 02:00:00, NaN  
18-Apr-2018 03:00:00, NaN  
18-Apr-2018 04:00:00, NaN  
18-Apr-2018 05:00:00, NaN  
18-Apr-2018 06:00:00, NaN  
18-Apr-2018 07:00:00, NaN  
18-Apr-2018 08:00:00, NaN  
18-Apr-2018 09:00:00, NaN  
18-Apr-2018 10:00:00, NaN  
18-Apr-2018 11:00:00, NaN  
18-Apr-2018 12:00:00, NaN  
18-Apr-2018 13:00:00, NaN  
18-Apr-2018 14:00:00, NaN  
18-Apr-2018 15:00:00, NaN  
18-Apr-2018 16:00:00, NaN  
18-Apr-2018 17:00:00, NaN  
18-Apr-2018 18:00:00, NaN  
18-Apr-2018 19:00:00, NaN  
18-Apr-2018 20:00:00, NaN  
18-Apr-2018 21:00:00, NaN  
18-Apr-2018 22:00:00, NaN  
18-Apr-2018 23:00:00, NaN

19-Apr-2018, NaN  
19-Apr-2018 01:00:00, NaN  
19-Apr-2018 02:00:00, NaN  
19-Apr-2018 03:00:00, NaN  
19-Apr-2018 04:00:00, NaN  
19-Apr-2018 05:00:00, NaN  
19-Apr-2018 06:00:00, NaN  
19-Apr-2018 07:00:00, NaN  
19-Apr-2018 08:00:00, NaN  
19-Apr-2018 09:00:00, NaN  
19-Apr-2018 10:00:00, NaN  
19-Apr-2018 11:00:00, NaN  
19-Apr-2018 12:00:00, NaN  
19-Apr-2018 13:00:00, NaN  
19-Apr-2018 14:00:00, NaN  
19-Apr-2018 15:00:00, NaN  
19-Apr-2018 16:00:00, NaN  
19-Apr-2018 17:00:00, NaN  
19-Apr-2018 18:00:00, NaN  
19-Apr-2018 19:00:00, NaN  
19-Apr-2018 20:00:00, NaN  
19-Apr-2018 21:00:00, NaN  
19-Apr-2018 22:00:00, NaN  
19-Apr-2018 23:00:00, NaN  
20-Apr-2018, NaN  
20-Apr-2018 01:00:00, NaN  
20-Apr-2018 02:00:00, NaN  
20-Apr-2018 03:00:00, NaN  
20-Apr-2018 04:00:00, NaN  
20-Apr-2018 05:00:00, NaN  
20-Apr-2018 06:00:00, NaN  
20-Apr-2018 07:00:00, NaN  
20-Apr-2018 08:00:00, NaN  
20-Apr-2018 09:00:00, NaN  
20-Apr-2018 10:00:00, NaN  
20-Apr-2018 11:00:00, NaN  
20-Apr-2018 12:00:00, NaN  
20-Apr-2018 13:00:00, NaN  
20-Apr-2018 14:00:00, NaN  
20-Apr-2018 15:00:00, NaN  
20-Apr-2018 16:00:00, NaN  
20-Apr-2018 17:00:00, NaN  
20-Apr-2018 18:00:00, NaN  
20-Apr-2018 19:00:00, NaN  
20-Apr-2018 20:00:00, NaN  
20-Apr-2018 21:00:00, NaN  
20-Apr-2018 22:00:00, NaN  
20-Apr-2018 23:00:00, NaN  
21-Apr-2018, NaN  
21-Apr-2018 01:00:00, NaN  
21-Apr-2018 02:00:00, NaN  
21-Apr-2018 03:00:00, NaN  
21-Apr-2018 04:00:00, NaN  
21-Apr-2018 05:00:00, NaN  
21-Apr-2018 06:00:00, NaN  
21-Apr-2018 07:00:00, NaN  
21-Apr-2018 08:00:00, NaN  
21-Apr-2018 09:00:00, NaN  
21-Apr-2018 10:00:00, NaN  
21-Apr-2018 11:00:00, NaN  
21-Apr-2018 12:00:00, NaN  
21-Apr-2018 13:00:00, NaN  
21-Apr-2018 14:00:00, NaN  
21-Apr-2018 15:00:00, NaN

21-Apr-2018 16:00:00, NaN  
21-Apr-2018 17:00:00, NaN  
21-Apr-2018 18:00:00, NaN  
21-Apr-2018 19:00:00, NaN  
21-Apr-2018 20:00:00, NaN  
21-Apr-2018 21:00:00, NaN  
21-Apr-2018 22:00:00, NaN  
21-Apr-2018 23:00:00, NaN  
22-Apr-2018, NaN  
22-Apr-2018 01:00:00, NaN  
22-Apr-2018 02:00:00, NaN  
22-Apr-2018 03:00:00, NaN  
22-Apr-2018 04:00:00, NaN  
22-Apr-2018 05:00:00, NaN  
22-Apr-2018 06:00:00, NaN  
22-Apr-2018 07:00:00, NaN  
22-Apr-2018 08:00:00, NaN  
22-Apr-2018 09:00:00, NaN  
22-Apr-2018 10:00:00, NaN  
22-Apr-2018 11:00:00, NaN  
22-Apr-2018 12:00:00, NaN  
22-Apr-2018 13:00:00, NaN  
22-Apr-2018 14:00:00, NaN  
22-Apr-2018 15:00:00, NaN  
22-Apr-2018 16:00:00, NaN  
22-Apr-2018 17:00:00, NaN  
22-Apr-2018 18:00:00, NaN  
22-Apr-2018 19:00:00, NaN  
22-Apr-2018 20:00:00, NaN  
22-Apr-2018 21:00:00, NaN  
22-Apr-2018 22:00:00, NaN  
22-Apr-2018 23:00:00, NaN  
23-Apr-2018, NaN  
23-Apr-2018 01:00:00, NaN  
23-Apr-2018 02:00:00, NaN  
23-Apr-2018 03:00:00, NaN  
23-Apr-2018 04:00:00, NaN  
23-Apr-2018 05:00:00, NaN  
23-Apr-2018 06:00:00, NaN  
23-Apr-2018 07:00:00, NaN  
23-Apr-2018 08:00:00, NaN  
23-Apr-2018 09:00:00, NaN  
23-Apr-2018 10:00:00, NaN  
23-Apr-2018 11:00:00, NaN  
23-Apr-2018 12:00:00, NaN  
23-Apr-2018 13:00:00, NaN  
23-Apr-2018 14:00:00, NaN  
23-Apr-2018 15:00:00, NaN  
23-Apr-2018 16:00:00, NaN  
23-Apr-2018 17:00:00, NaN  
23-Apr-2018 18:00:00, NaN  
23-Apr-2018 19:00:00, NaN  
23-Apr-2018 20:00:00, NaN  
23-Apr-2018 21:00:00, NaN  
23-Apr-2018 22:00:00, NaN  
23-Apr-2018 23:00:00, NaN  
24-Apr-2018, NaN  
24-Apr-2018 01:00:00, NaN  
24-Apr-2018 02:00:00, NaN  
24-Apr-2018 03:00:00, NaN  
24-Apr-2018 04:00:00, NaN  
24-Apr-2018 05:00:00, NaN  
24-Apr-2018 06:00:00, NaN  
24-Apr-2018 07:00:00, NaN

24-Apr-2018 08:00:00, NaN  
24-Apr-2018 09:00:00, NaN  
24-Apr-2018 10:00:00, NaN  
24-Apr-2018 11:00:00, NaN  
24-Apr-2018 12:00:00, NaN  
24-Apr-2018 13:00:00, NaN  
24-Apr-2018 14:00:00, NaN  
24-Apr-2018 15:00:00, NaN  
24-Apr-2018 16:00:00, NaN  
24-Apr-2018 17:00:00, NaN  
24-Apr-2018 18:00:00, NaN  
24-Apr-2018 19:00:00, NaN  
24-Apr-2018 20:00:00, NaN  
24-Apr-2018 21:00:00, NaN  
24-Apr-2018 22:00:00, NaN  
24-Apr-2018 23:00:00, NaN  
25-Apr-2018, NaN  
25-Apr-2018 01:00:00, NaN  
25-Apr-2018 02:00:00, NaN  
25-Apr-2018 03:00:00, NaN  
25-Apr-2018 04:00:00, NaN  
25-Apr-2018 05:00:00, NaN  
25-Apr-2018 06:00:00, NaN  
25-Apr-2018 07:00:00, NaN  
25-Apr-2018 08:00:00, NaN  
25-Apr-2018 09:00:00, NaN  
25-Apr-2018 10:00:00, NaN  
25-Apr-2018 11:00:00, NaN  
25-Apr-2018 12:00:00, NaN  
25-Apr-2018 13:00:00, NaN  
25-Apr-2018 14:00:00, NaN  
25-Apr-2018 15:00:00, NaN  
25-Apr-2018 16:00:00, NaN  
25-Apr-2018 17:00:00, NaN  
25-Apr-2018 18:00:00, NaN  
25-Apr-2018 19:00:00, NaN  
25-Apr-2018 20:00:00, NaN  
25-Apr-2018 21:00:00, NaN  
25-Apr-2018 22:00:00, NaN  
25-Apr-2018 23:00:00, NaN  
26-Apr-2018, NaN  
26-Apr-2018 01:00:00, NaN  
26-Apr-2018 02:00:00, NaN  
26-Apr-2018 03:00:00, NaN  
26-Apr-2018 04:00:00, NaN  
26-Apr-2018 05:00:00, NaN  
26-Apr-2018 06:00:00, NaN  
26-Apr-2018 07:00:00, NaN  
26-Apr-2018 08:00:00, NaN  
26-Apr-2018 09:00:00, NaN  
26-Apr-2018 10:00:00, NaN  
26-Apr-2018 11:00:00, NaN  
26-Apr-2018 12:00:00, NaN  
26-Apr-2018 13:00:00, NaN  
26-Apr-2018 14:00:00, NaN  
26-Apr-2018 15:00:00, NaN  
26-Apr-2018 16:00:00, NaN  
26-Apr-2018 17:00:00, NaN  
26-Apr-2018 18:00:00, NaN  
26-Apr-2018 19:00:00, NaN  
26-Apr-2018 20:00:00, NaN  
26-Apr-2018 21:00:00, NaN  
26-Apr-2018 22:00:00, NaN  
26-Apr-2018 23:00:00, NaN

27-Apr-2018, NaN  
27-Apr-2018 01:00:00, NaN  
27-Apr-2018 02:00:00, NaN  
27-Apr-2018 03:00:00, NaN  
27-Apr-2018 04:00:00, NaN  
27-Apr-2018 05:00:00, NaN  
27-Apr-2018 06:00:00, NaN  
27-Apr-2018 07:00:00, NaN  
27-Apr-2018 08:00:00, NaN  
27-Apr-2018 09:00:00, NaN  
27-Apr-2018 10:00:00, NaN  
27-Apr-2018 11:00:00, NaN  
27-Apr-2018 12:00:00, NaN  
27-Apr-2018 13:00:00, NaN  
27-Apr-2018 14:00:00, NaN  
27-Apr-2018 15:00:00, NaN  
27-Apr-2018 16:00:00, NaN  
27-Apr-2018 17:00:00, NaN  
27-Apr-2018 18:00:00, NaN  
27-Apr-2018 19:00:00, NaN  
27-Apr-2018 20:00:00, NaN  
27-Apr-2018 21:00:00, NaN  
27-Apr-2018 22:00:00, NaN  
27-Apr-2018 23:00:00, NaN  
28-Apr-2018, NaN  
28-Apr-2018 01:00:00, NaN  
28-Apr-2018 02:00:00, NaN  
28-Apr-2018 03:00:00, NaN  
28-Apr-2018 04:00:00, NaN  
28-Apr-2018 05:00:00, NaN  
28-Apr-2018 06:00:00, NaN  
28-Apr-2018 07:00:00, NaN  
28-Apr-2018 08:00:00, NaN  
28-Apr-2018 09:00:00, NaN  
28-Apr-2018 10:00:00, NaN  
28-Apr-2018 11:00:00, NaN  
28-Apr-2018 12:00:00, NaN  
28-Apr-2018 13:00:00, NaN  
28-Apr-2018 14:00:00, NaN  
28-Apr-2018 15:00:00, NaN  
28-Apr-2018 16:00:00, NaN  
28-Apr-2018 17:00:00, NaN  
28-Apr-2018 18:00:00, NaN  
28-Apr-2018 19:00:00, NaN  
28-Apr-2018 20:00:00, NaN  
28-Apr-2018 21:00:00, NaN  
28-Apr-2018 22:00:00, NaN  
28-Apr-2018 23:00:00, NaN  
29-Apr-2018, NaN  
29-Apr-2018 01:00:00, NaN  
29-Apr-2018 02:00:00, NaN  
29-Apr-2018 03:00:00, NaN  
29-Apr-2018 04:00:00, NaN  
29-Apr-2018 05:00:00, NaN  
29-Apr-2018 06:00:00, NaN  
29-Apr-2018 07:00:00, NaN  
29-Apr-2018 08:00:00, NaN  
29-Apr-2018 09:00:00, NaN  
29-Apr-2018 10:00:00, NaN  
29-Apr-2018 11:00:00, NaN  
29-Apr-2018 12:00:00, NaN  
29-Apr-2018 13:00:00, NaN  
29-Apr-2018 14:00:00, NaN  
29-Apr-2018 15:00:00, NaN



29-Apr-2018 16:00:00, NaN  
29-Apr-2018 17:00:00, NaN  
29-Apr-2018 18:00:00, NaN  
29-Apr-2018 19:00:00, NaN  
29-Apr-2018 20:00:00, NaN  
29-Apr-2018 21:00:00, NaN  
29-Apr-2018 22:00:00, NaN  
29-Apr-2018 23:00:00, NaN  
30-Apr-2018, NaN  
30-Apr-2018 01:00:00, NaN  
30-Apr-2018 02:00:00, NaN  
30-Apr-2018 03:00:00, NaN  
30-Apr-2018 04:00:00, NaN  
30-Apr-2018 05:00:00, NaN  
30-Apr-2018 06:00:00, NaN  
30-Apr-2018 07:00:00, NaN  
30-Apr-2018 08:00:00, NaN  
30-Apr-2018 09:00:00, NaN  
30-Apr-2018 10:00:00, NaN  
30-Apr-2018 11:00:00, NaN  
30-Apr-2018 12:00:00, NaN  
30-Apr-2018 13:00:00, NaN  
30-Apr-2018 14:00:00, NaN  
30-Apr-2018 15:00:00, NaN  
30-Apr-2018 16:00:00, NaN  
30-Apr-2018 17:00:00, NaN  
30-Apr-2018 18:00:00, NaN  
30-Apr-2018 19:00:00, NaN  
30-Apr-2018 20:00:00, NaN  
30-Apr-2018 21:00:00, NaN  
30-Apr-2018 22:00:00, NaN  
30-Apr-2018 23:00:00, NaN  
01-May-2018, NaN  
01-May-2018 01:00:00, NaN  
01-May-2018 02:00:00, NaN  
01-May-2018 03:00:00, NaN  
01-May-2018 04:00:00, NaN  
01-May-2018 05:00:00, NaN  
01-May-2018 06:00:00, NaN  
01-May-2018 07:00:00, NaN  
01-May-2018 08:00:00, NaN  
01-May-2018 09:00:00, NaN  
01-May-2018 10:00:00, NaN  
01-May-2018 11:00:00, NaN  
01-May-2018 12:00:00, NaN  
01-May-2018 13:00:00, NaN  
01-May-2018 14:00:00, NaN  
01-May-2018 15:00:00, NaN  
01-May-2018 16:00:00, NaN  
01-May-2018 17:00:00, NaN  
01-May-2018 18:00:00, NaN  
01-May-2018 19:00:00, NaN  
01-May-2018 20:00:00, NaN  
01-May-2018 21:00:00, NaN  
01-May-2018 22:00:00, NaN  
01-May-2018 23:00:00, NaN  
02-May-2018, NaN  
02-May-2018 01:00:00, NaN  
02-May-2018 02:00:00, NaN  
02-May-2018 03:00:00, NaN  
02-May-2018 04:00:00, NaN  
02-May-2018 05:00:00, NaN  
02-May-2018 06:00:00, NaN  
02-May-2018 07:00:00, NaN

02-May-2018 08:00:00, NaN  
02-May-2018 09:00:00, NaN  
02-May-2018 10:00:00, NaN  
02-May-2018 11:00:00, NaN  
02-May-2018 12:00:00, NaN  
02-May-2018 13:00:00, NaN  
02-May-2018 14:00:00, NaN  
02-May-2018 15:00:00, NaN  
02-May-2018 16:00:00, NaN  
02-May-2018 17:00:00, NaN  
02-May-2018 18:00:00, NaN  
02-May-2018 19:00:00, NaN  
02-May-2018 20:00:00, NaN  
02-May-2018 21:00:00, NaN  
02-May-2018 22:00:00, NaN  
02-May-2018 23:00:00, NaN  
03-May-2018, NaN  
03-May-2018 01:00:00, NaN  
03-May-2018 02:00:00, NaN  
03-May-2018 03:00:00, NaN  
03-May-2018 04:00:00, NaN  
03-May-2018 05:00:00, NaN  
03-May-2018 06:00:00, NaN  
03-May-2018 07:00:00, NaN  
03-May-2018 08:00:00, NaN  
03-May-2018 09:00:00, NaN  
03-May-2018 10:00:00, NaN  
03-May-2018 11:00:00, NaN  
03-May-2018 12:00:00, NaN  
03-May-2018 13:00:00, NaN  
03-May-2018 14:00:00, NaN  
03-May-2018 15:00:00, NaN  
03-May-2018 16:00:00, NaN  
03-May-2018 17:00:00, NaN  
03-May-2018 18:00:00, NaN  
03-May-2018 19:00:00, NaN  
03-May-2018 20:00:00, NaN  
03-May-2018 21:00:00, NaN  
03-May-2018 22:00:00, NaN  
03-May-2018 23:00:00, NaN  
04-May-2018, NaN  
04-May-2018 01:00:00, NaN  
04-May-2018 02:00:00, NaN  
04-May-2018 03:00:00, NaN  
04-May-2018 04:00:00, NaN  
04-May-2018 05:00:00, NaN  
04-May-2018 06:00:00, NaN  
04-May-2018 07:00:00, NaN  
04-May-2018 08:00:00, NaN  
04-May-2018 09:00:00, NaN  
04-May-2018 10:00:00, NaN  
04-May-2018 11:00:00, NaN  
04-May-2018 12:00:00, NaN  
04-May-2018 13:00:00, NaN  
04-May-2018 14:00:00, NaN  
04-May-2018 15:00:00, NaN  
04-May-2018 16:00:00, NaN  
04-May-2018 17:00:00, NaN  
04-May-2018 18:00:00, NaN  
04-May-2018 19:00:00, NaN  
04-May-2018 20:00:00, NaN  
04-May-2018 21:00:00, NaN  
04-May-2018 22:00:00, NaN  
04-May-2018 23:00:00, NaN

05-May-2018, NaN  
05-May-2018 01:00:00, NaN  
05-May-2018 02:00:00, NaN  
05-May-2018 03:00:00, NaN  
05-May-2018 04:00:00, NaN  
05-May-2018 05:00:00, NaN  
05-May-2018 06:00:00, NaN  
05-May-2018 07:00:00, NaN  
05-May-2018 08:00:00, NaN  
05-May-2018 09:00:00, NaN  
05-May-2018 10:00:00, NaN  
05-May-2018 11:00:00, NaN  
05-May-2018 12:00:00, NaN  
05-May-2018 13:00:00, NaN  
05-May-2018 14:00:00, NaN  
05-May-2018 15:00:00, NaN  
05-May-2018 16:00:00, NaN  
05-May-2018 17:00:00, NaN  
05-May-2018 18:00:00, NaN  
05-May-2018 19:00:00, NaN  
05-May-2018 20:00:00, NaN  
05-May-2018 21:00:00, NaN  
05-May-2018 22:00:00, NaN  
05-May-2018 23:00:00, NaN  
06-May-2018, NaN  
06-May-2018 01:00:00, NaN  
06-May-2018 02:00:00, NaN  
06-May-2018 03:00:00, NaN  
06-May-2018 04:00:00, NaN  
06-May-2018 05:00:00, NaN  
06-May-2018 06:00:00, NaN  
06-May-2018 07:00:00, NaN  
06-May-2018 08:00:00, NaN  
06-May-2018 09:00:00, NaN  
06-May-2018 10:00:00, NaN  
06-May-2018 11:00:00, NaN  
06-May-2018 12:00:00, NaN  
06-May-2018 13:00:00, NaN  
06-May-2018 14:00:00, NaN  
06-May-2018 15:00:00, NaN  
06-May-2018 16:00:00, NaN  
06-May-2018 17:00:00, NaN  
06-May-2018 18:00:00, NaN  
06-May-2018 19:00:00, NaN  
06-May-2018 20:00:00, NaN  
06-May-2018 21:00:00, NaN  
06-May-2018 22:00:00, NaN  
06-May-2018 23:00:00, NaN  
07-May-2018, NaN  
07-May-2018 01:00:00, NaN  
07-May-2018 02:00:00, NaN  
07-May-2018 03:00:00, NaN  
07-May-2018 04:00:00, NaN  
07-May-2018 05:00:00, NaN  
07-May-2018 06:00:00, NaN  
07-May-2018 07:00:00, NaN  
07-May-2018 08:00:00, NaN  
07-May-2018 09:00:00, NaN  
07-May-2018 10:00:00, NaN  
07-May-2018 11:00:00, NaN  
07-May-2018 12:00:00, NaN  
07-May-2018 13:00:00, NaN  
07-May-2018 14:00:00, NaN  
07-May-2018 15:00:00, NaN

07-May-2018 16:00:00, NaN  
07-May-2018 17:00:00, NaN  
07-May-2018 18:00:00, NaN  
07-May-2018 19:00:00, NaN  
07-May-2018 20:00:00, NaN  
07-May-2018 21:00:00, NaN  
07-May-2018 22:00:00, NaN  
07-May-2018 23:00:00, NaN  
08-May-2018, NaN  
08-May-2018 01:00:00, NaN  
08-May-2018 02:00:00, NaN  
08-May-2018 03:00:00, NaN  
08-May-2018 04:00:00, NaN  
08-May-2018 05:00:00, NaN  
08-May-2018 06:00:00, NaN  
08-May-2018 07:00:00, NaN  
08-May-2018 08:00:00, NaN  
08-May-2018 09:00:00, NaN  
08-May-2018 10:00:00, NaN  
08-May-2018 11:00:00, NaN  
08-May-2018 12:00:00, NaN  
08-May-2018 13:00:00, NaN  
08-May-2018 14:00:00, NaN  
08-May-2018 15:00:00, NaN  
08-May-2018 16:00:00, NaN  
08-May-2018 17:00:00, NaN  
08-May-2018 18:00:00, NaN  
08-May-2018 19:00:00, NaN  
08-May-2018 20:00:00, NaN  
08-May-2018 21:00:00, NaN  
08-May-2018 22:00:00, NaN  
08-May-2018 23:00:00, NaN  
09-May-2018, NaN  
09-May-2018 01:00:00, NaN  
09-May-2018 02:00:00, NaN  
09-May-2018 03:00:00, NaN  
09-May-2018 04:00:00, NaN  
09-May-2018 05:00:00, NaN  
09-May-2018 06:00:00, NaN  
09-May-2018 07:00:00, NaN  
09-May-2018 08:00:00, NaN  
09-May-2018 09:00:00, NaN  
09-May-2018 10:00:00, NaN  
09-May-2018 11:00:00, NaN  
09-May-2018 12:00:00, NaN  
09-May-2018 13:00:00, NaN  
09-May-2018 14:00:00, NaN  
09-May-2018 15:00:00, NaN  
09-May-2018 16:00:00, NaN  
09-May-2018 17:00:00, NaN  
09-May-2018 18:00:00, NaN  
09-May-2018 19:00:00, NaN  
09-May-2018 20:00:00, NaN  
09-May-2018 21:00:00, NaN  
09-May-2018 22:00:00, NaN  
09-May-2018 23:00:00, NaN  
10-May-2018, NaN  
10-May-2018 01:00:00, NaN  
10-May-2018 02:00:00, NaN  
10-May-2018 03:00:00, NaN  
10-May-2018 04:00:00, NaN  
10-May-2018 05:00:00, NaN  
10-May-2018 06:00:00, NaN  
10-May-2018 07:00:00, NaN

10-May-2018 08:00:00, NaN  
10-May-2018 09:00:00, NaN  
10-May-2018 10:00:00, NaN  
10-May-2018 11:00:00, NaN  
10-May-2018 12:00:00, NaN  
10-May-2018 13:00:00, NaN  
10-May-2018 14:00:00, NaN  
10-May-2018 15:00:00, NaN  
10-May-2018 16:00:00, NaN  
10-May-2018 17:00:00, NaN  
10-May-2018 18:00:00, NaN  
10-May-2018 19:00:00, NaN  
10-May-2018 20:00:00, NaN  
10-May-2018 21:00:00, NaN  
10-May-2018 22:00:00, NaN  
10-May-2018 23:00:00, NaN  
11-May-2018, NaN  
11-May-2018 01:00:00, NaN  
11-May-2018 02:00:00, NaN  
11-May-2018 03:00:00, NaN  
11-May-2018 04:00:00, NaN  
11-May-2018 05:00:00, NaN  
11-May-2018 06:00:00, NaN  
11-May-2018 07:00:00, NaN  
11-May-2018 08:00:00, NaN  
11-May-2018 09:00:00, NaN  
11-May-2018 10:00:00, NaN  
11-May-2018 11:00:00, NaN  
11-May-2018 12:00:00, NaN  
11-May-2018 13:00:00, NaN  
11-May-2018 14:00:00, NaN  
11-May-2018 15:00:00, NaN  
11-May-2018 16:00:00, NaN  
11-May-2018 17:00:00, NaN  
11-May-2018 18:00:00, NaN  
11-May-2018 19:00:00, NaN  
11-May-2018 20:00:00, NaN  
11-May-2018 21:00:00, NaN  
11-May-2018 22:00:00, NaN  
11-May-2018 23:00:00, NaN  
12-May-2018, NaN  
12-May-2018 01:00:00, NaN  
12-May-2018 02:00:00, NaN  
12-May-2018 03:00:00, NaN  
12-May-2018 04:00:00, NaN  
12-May-2018 05:00:00, NaN  
12-May-2018 06:00:00, NaN  
12-May-2018 07:00:00, NaN  
12-May-2018 08:00:00, NaN  
12-May-2018 09:00:00, NaN  
12-May-2018 10:00:00, NaN  
12-May-2018 11:00:00, NaN  
12-May-2018 12:00:00, NaN  
12-May-2018 13:00:00, NaN  
12-May-2018 14:00:00, NaN  
12-May-2018 15:00:00, NaN  
12-May-2018 16:00:00, NaN  
12-May-2018 17:00:00, NaN  
12-May-2018 18:00:00, NaN  
12-May-2018 19:00:00, NaN  
12-May-2018 20:00:00, NaN  
12-May-2018 21:00:00, NaN  
12-May-2018 22:00:00, NaN  
12-May-2018 23:00:00, NaN

13-May-2018, NaN  
13-May-2018 01:00:00, NaN  
13-May-2018 02:00:00, NaN  
13-May-2018 03:00:00, NaN  
13-May-2018 04:00:00, NaN  
13-May-2018 05:00:00, NaN  
13-May-2018 06:00:00, NaN  
13-May-2018 07:00:00, NaN  
13-May-2018 08:00:00, NaN  
13-May-2018 09:00:00, NaN  
13-May-2018 10:00:00, NaN  
13-May-2018 11:00:00, NaN  
13-May-2018 12:00:00, NaN  
13-May-2018 13:00:00, NaN  
13-May-2018 14:00:00, NaN  
13-May-2018 15:00:00, NaN  
13-May-2018 16:00:00, NaN  
13-May-2018 17:00:00, NaN  
13-May-2018 18:00:00, NaN  
13-May-2018 19:00:00, NaN  
13-May-2018 20:00:00, NaN  
13-May-2018 21:00:00, NaN  
13-May-2018 22:00:00, NaN  
13-May-2018 23:00:00, NaN  
14-May-2018, NaN  
14-May-2018 01:00:00, NaN  
14-May-2018 02:00:00, NaN  
14-May-2018 03:00:00, NaN  
14-May-2018 04:00:00, NaN  
14-May-2018 05:00:00, NaN  
14-May-2018 06:00:00, NaN  
14-May-2018 07:00:00, NaN  
14-May-2018 08:00:00, NaN  
14-May-2018 09:00:00, NaN  
14-May-2018 10:00:00, NaN  
14-May-2018 11:00:00, NaN  
14-May-2018 12:00:00, NaN  
14-May-2018 13:00:00, NaN  
14-May-2018 14:00:00, NaN  
14-May-2018 15:00:00, NaN  
14-May-2018 16:00:00, NaN  
14-May-2018 17:00:00, NaN  
14-May-2018 18:00:00, NaN  
14-May-2018 19:00:00, NaN  
14-May-2018 20:00:00, NaN  
14-May-2018 21:00:00, NaN  
14-May-2018 22:00:00, NaN  
14-May-2018 23:00:00, NaN  
15-May-2018, NaN  
15-May-2018 01:00:00, NaN  
15-May-2018 02:00:00, NaN  
15-May-2018 03:00:00, NaN  
15-May-2018 04:00:00, NaN  
15-May-2018 05:00:00, NaN  
15-May-2018 06:00:00, NaN  
15-May-2018 07:00:00, NaN  
15-May-2018 08:00:00, NaN  
15-May-2018 09:00:00, NaN  
15-May-2018 10:00:00, NaN  
15-May-2018 11:00:00, NaN  
15-May-2018 12:00:00, NaN  
15-May-2018 13:00:00, NaN  
15-May-2018 14:00:00, NaN  
15-May-2018 15:00:00, NaN

15-May-2018 16:00:00, NaN  
15-May-2018 17:00:00, NaN  
15-May-2018 18:00:00, NaN  
15-May-2018 19:00:00, NaN  
15-May-2018 20:00:00, NaN  
15-May-2018 21:00:00, NaN  
15-May-2018 22:00:00, NaN  
15-May-2018 23:00:00, NaN  
16-May-2018, NaN  
16-May-2018 01:00:00, NaN  
16-May-2018 02:00:00, NaN  
16-May-2018 03:00:00, NaN  
16-May-2018 04:00:00, NaN  
16-May-2018 05:00:00, NaN  
16-May-2018 06:00:00, NaN  
16-May-2018 07:00:00, NaN  
16-May-2018 08:00:00, NaN  
16-May-2018 09:00:00, NaN  
16-May-2018 10:00:00, NaN  
16-May-2018 11:00:00, NaN  
16-May-2018 12:00:00, NaN  
16-May-2018 13:00:00, NaN  
16-May-2018 14:00:00, NaN  
16-May-2018 15:00:00, NaN  
16-May-2018 16:00:00, NaN  
16-May-2018 17:00:00, NaN  
16-May-2018 18:00:00, NaN  
16-May-2018 19:00:00, NaN  
16-May-2018 20:00:00, NaN  
16-May-2018 21:00:00, NaN  
16-May-2018 22:00:00, NaN  
16-May-2018 23:00:00, NaN  
17-May-2018, NaN  
17-May-2018 01:00:00, NaN  
17-May-2018 02:00:00, NaN  
17-May-2018 03:00:00, NaN  
17-May-2018 04:00:00, NaN  
17-May-2018 05:00:00, NaN  
17-May-2018 06:00:00, NaN  
17-May-2018 07:00:00, NaN  
17-May-2018 08:00:00, NaN  
17-May-2018 09:00:00, NaN  
17-May-2018 10:00:00, NaN  
17-May-2018 11:00:00, NaN  
17-May-2018 12:00:00, NaN  
17-May-2018 13:00:00, NaN  
17-May-2018 14:00:00, NaN  
17-May-2018 15:00:00, NaN  
17-May-2018 16:00:00, NaN  
17-May-2018 17:00:00, NaN  
17-May-2018 18:00:00, NaN  
17-May-2018 19:00:00, NaN  
17-May-2018 20:00:00, NaN  
17-May-2018 21:00:00, NaN  
17-May-2018 22:00:00, NaN  
17-May-2018 23:00:00, NaN  
18-May-2018, NaN  
18-May-2018 01:00:00, NaN  
18-May-2018 02:00:00, NaN  
18-May-2018 03:00:00, NaN  
18-May-2018 04:00:00, NaN  
18-May-2018 05:00:00, NaN  
18-May-2018 06:00:00, NaN  
18-May-2018 07:00:00, NaN

18-May-2018 08:00:00, NaN  
18-May-2018 09:00:00, NaN  
18-May-2018 10:00:00, NaN  
18-May-2018 11:00:00, NaN  
18-May-2018 12:00:00, NaN  
18-May-2018 13:00:00, NaN  
18-May-2018 14:00:00, NaN  
18-May-2018 15:00:00, NaN  
18-May-2018 16:00:00, NaN  
18-May-2018 17:00:00, NaN  
18-May-2018 18:00:00, NaN  
18-May-2018 19:00:00, NaN  
18-May-2018 20:00:00, NaN  
18-May-2018 21:00:00, NaN  
18-May-2018 22:00:00, NaN  
18-May-2018 23:00:00, NaN  
19-May-2018, NaN  
19-May-2018 01:00:00, NaN  
19-May-2018 02:00:00, NaN  
19-May-2018 03:00:00, NaN  
19-May-2018 04:00:00, NaN  
19-May-2018 05:00:00, NaN  
19-May-2018 06:00:00, NaN  
19-May-2018 07:00:00, NaN  
19-May-2018 08:00:00, NaN  
19-May-2018 09:00:00, NaN  
19-May-2018 10:00:00, NaN  
19-May-2018 11:00:00, NaN  
19-May-2018 12:00:00, NaN  
19-May-2018 13:00:00, NaN  
19-May-2018 14:00:00, NaN  
19-May-2018 15:00:00, NaN  
19-May-2018 16:00:00, NaN  
19-May-2018 17:00:00, NaN  
19-May-2018 18:00:00, NaN  
19-May-2018 19:00:00, NaN  
19-May-2018 20:00:00, NaN  
19-May-2018 21:00:00, NaN  
19-May-2018 22:00:00, NaN  
19-May-2018 23:00:00, NaN  
20-May-2018, NaN  
20-May-2018 01:00:00, NaN  
20-May-2018 02:00:00, NaN  
20-May-2018 03:00:00, NaN  
20-May-2018 04:00:00, NaN  
20-May-2018 05:00:00, NaN  
20-May-2018 06:00:00, NaN  
20-May-2018 07:00:00, NaN  
20-May-2018 08:00:00, NaN  
20-May-2018 09:00:00, NaN  
20-May-2018 10:00:00, NaN  
20-May-2018 11:00:00, NaN  
20-May-2018 12:00:00, NaN  
20-May-2018 13:00:00, NaN  
20-May-2018 14:00:00, NaN  
20-May-2018 15:00:00, NaN  
20-May-2018 16:00:00, NaN  
20-May-2018 17:00:00, NaN  
20-May-2018 18:00:00, NaN  
20-May-2018 19:00:00, NaN  
20-May-2018 20:00:00, NaN  
20-May-2018 21:00:00, NaN  
20-May-2018 22:00:00, NaN  
20-May-2018 23:00:00, NaN



21-May-2018, NaN  
21-May-2018 01:00:00, NaN  
21-May-2018 02:00:00, NaN  
21-May-2018 03:00:00, NaN  
21-May-2018 04:00:00, NaN  
21-May-2018 05:00:00, NaN  
21-May-2018 06:00:00, NaN  
21-May-2018 07:00:00, NaN  
21-May-2018 08:00:00, NaN  
21-May-2018 09:00:00, NaN  
21-May-2018 10:00:00, NaN  
21-May-2018 11:00:00, NaN  
21-May-2018 12:00:00, NaN  
21-May-2018 13:00:00, NaN  
21-May-2018 14:00:00, NaN  
21-May-2018 15:00:00, NaN  
21-May-2018 16:00:00, NaN  
21-May-2018 17:00:00, NaN  
21-May-2018 18:00:00, NaN  
21-May-2018 19:00:00, NaN  
21-May-2018 20:00:00, NaN  
21-May-2018 21:00:00, NaN  
21-May-2018 22:00:00, NaN  
21-May-2018 23:00:00, NaN  
22-May-2018, NaN  
22-May-2018 01:00:00, NaN  
22-May-2018 02:00:00, NaN  
22-May-2018 03:00:00, NaN  
22-May-2018 04:00:00, NaN  
22-May-2018 05:00:00, NaN  
22-May-2018 06:00:00, NaN  
22-May-2018 07:00:00, NaN  
22-May-2018 08:00:00, NaN  
22-May-2018 09:00:00, NaN  
22-May-2018 10:00:00, NaN  
22-May-2018 11:00:00, NaN  
22-May-2018 12:00:00, NaN  
22-May-2018 13:00:00, NaN  
22-May-2018 14:00:00, NaN  
22-May-2018 15:00:00, NaN  
22-May-2018 16:00:00, NaN  
22-May-2018 17:00:00, NaN  
22-May-2018 18:00:00, NaN  
22-May-2018 19:00:00, NaN  
22-May-2018 20:00:00, NaN  
22-May-2018 21:00:00, NaN  
22-May-2018 22:00:00, NaN  
22-May-2018 23:00:00, NaN  
23-May-2018, NaN  
23-May-2018 01:00:00, NaN  
23-May-2018 02:00:00, NaN  
23-May-2018 03:00:00, NaN  
23-May-2018 04:00:00, NaN  
23-May-2018 05:00:00, NaN  
23-May-2018 06:00:00, NaN  
23-May-2018 07:00:00, NaN  
23-May-2018 08:00:00, NaN  
23-May-2018 09:00:00, NaN  
23-May-2018 10:00:00, NaN  
23-May-2018 11:00:00, NaN  
23-May-2018 12:00:00, NaN  
23-May-2018 13:00:00, NaN  
23-May-2018 14:00:00, NaN  
23-May-2018 15:00:00, NaN

23-May-2018 16:00:00, NaN  
23-May-2018 17:00:00, NaN  
23-May-2018 18:00:00, NaN  
23-May-2018 19:00:00, NaN  
23-May-2018 20:00:00, NaN  
23-May-2018 21:00:00, NaN  
23-May-2018 22:00:00, NaN  
23-May-2018 23:00:00, NaN  
24-May-2018, NaN  
24-May-2018 01:00:00, NaN  
24-May-2018 02:00:00, NaN  
24-May-2018 03:00:00, NaN  
24-May-2018 04:00:00, NaN  
24-May-2018 05:00:00, NaN  
24-May-2018 06:00:00, NaN  
24-May-2018 07:00:00, NaN  
24-May-2018 08:00:00, NaN  
24-May-2018 09:00:00, NaN  
24-May-2018 10:00:00, NaN  
24-May-2018 11:00:00, NaN  
24-May-2018 12:00:00, NaN  
24-May-2018 13:00:00, NaN  
24-May-2018 14:00:00, NaN  
24-May-2018 15:00:00, NaN  
24-May-2018 16:00:00, NaN  
24-May-2018 17:00:00, NaN  
24-May-2018 18:00:00, NaN  
24-May-2018 19:00:00, NaN  
24-May-2018 20:00:00, NaN  
24-May-2018 21:00:00, NaN  
24-May-2018 22:00:00, NaN  
24-May-2018 23:00:00, NaN  
25-May-2018, NaN  
25-May-2018 01:00:00, NaN  
25-May-2018 02:00:00, NaN  
25-May-2018 03:00:00, NaN  
25-May-2018 04:00:00, NaN  
25-May-2018 05:00:00, NaN  
25-May-2018 06:00:00, NaN  
25-May-2018 07:00:00, NaN  
25-May-2018 08:00:00, NaN  
25-May-2018 09:00:00, NaN  
25-May-2018 10:00:00, NaN  
25-May-2018 11:00:00, NaN  
25-May-2018 12:00:00, NaN  
25-May-2018 13:00:00, NaN  
25-May-2018 14:00:00, NaN  
25-May-2018 15:00:00, NaN  
25-May-2018 16:00:00, NaN  
25-May-2018 17:00:00, NaN  
25-May-2018 18:00:00, NaN  
25-May-2018 19:00:00, NaN  
25-May-2018 20:00:00, NaN  
25-May-2018 21:00:00, NaN  
25-May-2018 22:00:00, NaN  
25-May-2018 23:00:00, NaN  
26-May-2018, NaN  
26-May-2018 01:00:00, NaN  
26-May-2018 02:00:00, NaN  
26-May-2018 03:00:00, NaN  
26-May-2018 04:00:00, NaN  
26-May-2018 05:00:00, NaN  
26-May-2018 06:00:00, NaN  
26-May-2018 07:00:00, NaN

26-May-2018 08:00:00, NaN  
26-May-2018 09:00:00, NaN  
26-May-2018 10:00:00, NaN  
26-May-2018 11:00:00, NaN  
26-May-2018 12:00:00, NaN  
26-May-2018 13:00:00, NaN  
26-May-2018 14:00:00, NaN  
26-May-2018 15:00:00, NaN  
26-May-2018 16:00:00, NaN  
26-May-2018 17:00:00, NaN  
26-May-2018 18:00:00, NaN  
26-May-2018 19:00:00, NaN  
26-May-2018 20:00:00, NaN  
26-May-2018 21:00:00, NaN  
26-May-2018 22:00:00, NaN  
26-May-2018 23:00:00, NaN  
27-May-2018, NaN  
27-May-2018 01:00:00, NaN  
27-May-2018 02:00:00, NaN  
27-May-2018 03:00:00, NaN  
27-May-2018 04:00:00, NaN  
27-May-2018 05:00:00, NaN  
27-May-2018 06:00:00, NaN  
27-May-2018 07:00:00, NaN  
27-May-2018 08:00:00, NaN  
27-May-2018 09:00:00, NaN  
27-May-2018 10:00:00, NaN  
27-May-2018 11:00:00, NaN  
27-May-2018 12:00:00, NaN  
27-May-2018 13:00:00, NaN  
27-May-2018 14:00:00, NaN  
27-May-2018 15:00:00, NaN  
27-May-2018 16:00:00, NaN  
27-May-2018 17:00:00, NaN  
27-May-2018 18:00:00, NaN  
27-May-2018 19:00:00, NaN  
27-May-2018 20:00:00, NaN  
27-May-2018 21:00:00, NaN  
27-May-2018 22:00:00, NaN  
27-May-2018 23:00:00, NaN  
28-May-2018, NaN  
28-May-2018 01:00:00, NaN  
28-May-2018 02:00:00, NaN  
28-May-2018 03:00:00, NaN  
28-May-2018 04:00:00, NaN  
28-May-2018 05:00:00, NaN  
28-May-2018 06:00:00, NaN  
28-May-2018 07:00:00, NaN  
28-May-2018 08:00:00, NaN  
28-May-2018 09:00:00, NaN  
28-May-2018 10:00:00, NaN  
28-May-2018 11:00:00, NaN  
28-May-2018 12:00:00, NaN  
28-May-2018 13:00:00, NaN  
28-May-2018 14:00:00, NaN  
28-May-2018 15:00:00, NaN  
28-May-2018 16:00:00, NaN  
28-May-2018 17:00:00, NaN  
28-May-2018 18:00:00, NaN  
28-May-2018 19:00:00, NaN  
28-May-2018 20:00:00, NaN  
28-May-2018 21:00:00, NaN  
28-May-2018 22:00:00, NaN  
28-May-2018 23:00:00, NaN

29-May-2018, NaN  
29-May-2018 01:00:00, NaN  
29-May-2018 02:00:00, NaN  
29-May-2018 03:00:00, NaN  
29-May-2018 04:00:00, NaN  
29-May-2018 05:00:00, NaN  
29-May-2018 06:00:00, NaN  
29-May-2018 07:00:00, NaN  
29-May-2018 08:00:00, NaN  
29-May-2018 09:00:00, NaN  
29-May-2018 10:00:00, NaN  
29-May-2018 11:00:00, NaN  
29-May-2018 12:00:00, NaN  
29-May-2018 13:00:00, NaN  
29-May-2018 14:00:00, NaN  
29-May-2018 15:00:00, NaN  
29-May-2018 16:00:00, NaN  
29-May-2018 17:00:00, NaN  
29-May-2018 18:00:00, NaN  
29-May-2018 19:00:00, NaN  
29-May-2018 20:00:00, NaN  
29-May-2018 21:00:00, NaN  
29-May-2018 22:00:00, NaN  
29-May-2018 23:00:00, NaN  
30-May-2018, NaN  
30-May-2018 01:00:00, NaN  
30-May-2018 02:00:00, NaN  
30-May-2018 03:00:00, NaN  
30-May-2018 04:00:00, NaN  
30-May-2018 05:00:00, NaN  
30-May-2018 06:00:00, NaN  
30-May-2018 07:00:00, NaN  
30-May-2018 08:00:00, NaN  
30-May-2018 09:00:00, NaN  
30-May-2018 10:00:00, NaN  
30-May-2018 11:00:00, NaN  
30-May-2018 12:00:00, NaN  
30-May-2018 13:00:00, NaN  
30-May-2018 14:00:00, NaN  
30-May-2018 15:00:00, NaN  
30-May-2018 16:00:00, NaN  
30-May-2018 17:00:00, NaN  
30-May-2018 18:00:00, NaN  
30-May-2018 19:00:00, NaN  
30-May-2018 20:00:00, NaN  
30-May-2018 21:00:00, NaN  
30-May-2018 22:00:00, NaN  
30-May-2018 23:00:00, NaN  
31-May-2018, NaN  
31-May-2018 01:00:00, NaN  
31-May-2018 02:00:00, NaN  
31-May-2018 03:00:00, NaN  
31-May-2018 04:00:00, NaN  
31-May-2018 05:00:00, NaN  
31-May-2018 06:00:00, NaN  
31-May-2018 07:00:00, NaN  
31-May-2018 08:00:00, NaN  
31-May-2018 09:00:00, NaN  
31-May-2018 10:00:00, NaN  
31-May-2018 11:00:00, NaN  
31-May-2018 12:00:00, NaN  
31-May-2018 13:00:00, NaN  
31-May-2018 14:00:00, NaN  
31-May-2018 15:00:00, NaN

31-May-2018 16:00:00, NaN  
31-May-2018 17:00:00, NaN  
31-May-2018 18:00:00, NaN  
31-May-2018 19:00:00, NaN  
31-May-2018 20:00:00, NaN  
31-May-2018 21:00:00, NaN  
31-May-2018 22:00:00, NaN  
31-May-2018 23:00:00, NaN  
01-Jun-2018, 1.51e-01  
01-Jun-2018 01:00:00, 1.51e-01  
01-Jun-2018 02:00:00, 1.51e-01  
01-Jun-2018 03:00:00, 1.52e-01  
01-Jun-2018 04:00:00, 1.52e-01  
01-Jun-2018 05:00:00, 1.52e-01  
01-Jun-2018 06:00:00, 1.52e-01  
01-Jun-2018 07:00:00, 1.52e-01  
01-Jun-2018 08:00:00, 1.52e-01  
01-Jun-2018 09:00:00, 1.52e-01  
01-Jun-2018 10:00:00, 1.52e-01  
01-Jun-2018 11:00:00, 1.51e-01  
01-Jun-2018 12:00:00, 1.51e-01  
01-Jun-2018 13:00:00, 1.51e-01  
01-Jun-2018 14:00:00, 1.51e-01  
01-Jun-2018 15:00:00, 1.51e-01  
01-Jun-2018 16:00:00, 1.51e-01  
01-Jun-2018 17:00:00, 1.51e-01  
01-Jun-2018 18:00:00, 1.51e-01  
01-Jun-2018 19:00:00, 1.51e-01  
01-Jun-2018 20:00:00, 1.51e-01  
01-Jun-2018 21:00:00, 1.51e-01  
01-Jun-2018 22:00:00, 1.51e-01  
01-Jun-2018 23:00:00, 1.51e-01  
02-Jun-2018, 1.51e-01  
02-Jun-2018 01:00:00, 1.51e-01  
02-Jun-2018 02:00:00, 1.51e-01  
02-Jun-2018 03:00:00, 1.51e-01  
02-Jun-2018 04:00:00, 1.51e-01  
02-Jun-2018 05:00:00, 1.51e-01  
02-Jun-2018 06:00:00, 1.51e-01  
02-Jun-2018 07:00:00, 1.51e-01  
02-Jun-2018 08:00:00, 1.51e-01  
02-Jun-2018 09:00:00, 1.51e-01  
02-Jun-2018 10:00:00, 1.51e-01  
02-Jun-2018 11:00:00, 1.51e-01  
02-Jun-2018 12:00:00, 1.51e-01  
02-Jun-2018 13:00:00, 1.51e-01  
02-Jun-2018 14:00:00, 1.51e-01  
02-Jun-2018 15:00:00, 1.51e-01  
02-Jun-2018 16:00:00, 1.51e-01  
02-Jun-2018 17:00:00, 1.51e-01  
02-Jun-2018 18:00:00, 1.50e-01  
02-Jun-2018 19:00:00, 1.50e-01  
02-Jun-2018 20:00:00, 1.50e-01  
02-Jun-2018 21:00:00, 1.50e-01  
02-Jun-2018 22:00:00, 1.50e-01  
02-Jun-2018 23:00:00, 1.50e-01  
03-Jun-2018, 1.50e-01  
03-Jun-2018 01:00:00, 1.51e-01  
03-Jun-2018 02:00:00, 1.51e-01  
03-Jun-2018 03:00:00, 1.51e-01  
03-Jun-2018 04:00:00, 1.51e-01  
03-Jun-2018 05:00:00, 1.51e-01  
03-Jun-2018 06:00:00, 1.51e-01  
03-Jun-2018 07:00:00, 1.51e-01

03-Jun-2018 08:00:00, 1.51e-01  
03-Jun-2018 09:00:00, 1.51e-01  
03-Jun-2018 10:00:00, 1.51e-01  
03-Jun-2018 11:00:00, 1.51e-01  
03-Jun-2018 12:00:00, 1.51e-01  
03-Jun-2018 13:00:00, 1.51e-01  
03-Jun-2018 14:00:00, 1.50e-01  
03-Jun-2018 15:00:00, 1.50e-01  
03-Jun-2018 16:00:00, 1.50e-01  
03-Jun-2018 17:00:00, 1.49e-01  
03-Jun-2018 18:00:00, 1.49e-01  
03-Jun-2018 19:00:00, 1.49e-01  
03-Jun-2018 20:00:00, 1.49e-01  
03-Jun-2018 21:00:00, 1.49e-01  
03-Jun-2018 22:00:00, 1.50e-01  
03-Jun-2018 23:00:00, 1.50e-01  
04-Jun-2018, 1.50e-01  
04-Jun-2018 01:00:00, 1.50e-01  
04-Jun-2018 02:00:00, 1.50e-01  
04-Jun-2018 03:00:00, 1.51e-01  
04-Jun-2018 04:00:00, 1.51e-01  
04-Jun-2018 05:00:00, 1.51e-01  
04-Jun-2018 06:00:00, 1.51e-01  
04-Jun-2018 07:00:00, 1.51e-01  
04-Jun-2018 08:00:00, 1.51e-01  
04-Jun-2018 09:00:00, 1.51e-01  
04-Jun-2018 10:00:00, 1.51e-01  
04-Jun-2018 11:00:00, 1.51e-01  
04-Jun-2018 12:00:00, 1.50e-01  
04-Jun-2018 13:00:00, 1.50e-01  
04-Jun-2018 14:00:00, 1.49e-01  
04-Jun-2018 15:00:00, 1.49e-01  
04-Jun-2018 16:00:00, 1.49e-01  
04-Jun-2018 17:00:00, 1.49e-01  
04-Jun-2018 18:00:00, 1.49e-01  
04-Jun-2018 19:00:00, 1.49e-01  
04-Jun-2018 20:00:00, 1.49e-01  
04-Jun-2018 21:00:00, 1.49e-01  
04-Jun-2018 22:00:00, 1.49e-01  
04-Jun-2018 23:00:00, 1.49e-01  
05-Jun-2018, 1.49e-01  
05-Jun-2018 01:00:00, 1.49e-01  
05-Jun-2018 02:00:00, 1.49e-01  
05-Jun-2018 03:00:00, 1.49e-01  
05-Jun-2018 04:00:00, 1.49e-01  
05-Jun-2018 05:00:00, 1.49e-01  
05-Jun-2018 06:00:00, 1.49e-01  
05-Jun-2018 07:00:00, 1.49e-01  
05-Jun-2018 08:00:00, 1.49e-01  
05-Jun-2018 09:00:00, 1.49e-01  
05-Jun-2018 10:00:00, 1.49e-01  
05-Jun-2018 11:00:00, 1.49e-01  
05-Jun-2018 12:00:00, 1.49e-01  
05-Jun-2018 13:00:00, 1.49e-01  
05-Jun-2018 14:00:00, 1.49e-01  
05-Jun-2018 15:00:00, 1.48e-01  
05-Jun-2018 16:00:00, 1.48e-01  
05-Jun-2018 17:00:00, 1.47e-01  
05-Jun-2018 18:00:00, 1.47e-01  
05-Jun-2018 19:00:00, 1.47e-01  
05-Jun-2018 20:00:00, 1.47e-01  
05-Jun-2018 21:00:00, 1.47e-01  
05-Jun-2018 22:00:00, 1.47e-01  
05-Jun-2018 23:00:00, 1.47e-01

06-Jun-2018, 1.47e-01  
06-Jun-2018 01:00:00, 1.47e-01  
06-Jun-2018 02:00:00, 1.48e-01  
06-Jun-2018 03:00:00, 1.48e-01  
06-Jun-2018 04:00:00, 1.48e-01  
06-Jun-2018 05:00:00, 1.48e-01  
06-Jun-2018 06:00:00, 1.48e-01  
06-Jun-2018 07:00:00, 1.48e-01  
06-Jun-2018 08:00:00, 1.48e-01  
06-Jun-2018 09:00:00, 1.48e-01  
06-Jun-2018 10:00:00, 1.48e-01  
06-Jun-2018 11:00:00, 1.48e-01  
06-Jun-2018 12:00:00, 1.47e-01  
06-Jun-2018 13:00:00, 1.47e-01  
06-Jun-2018 14:00:00, 1.47e-01  
06-Jun-2018 15:00:00, 1.47e-01  
06-Jun-2018 16:00:00, 1.47e-01  
06-Jun-2018 17:00:00, 1.47e-01  
06-Jun-2018 18:00:00, 1.47e-01  
06-Jun-2018 19:00:00, 1.46e-01  
06-Jun-2018 20:00:00, 1.46e-01  
06-Jun-2018 21:00:00, 1.47e-01  
06-Jun-2018 22:00:00, 1.47e-01  
06-Jun-2018 23:00:00, 1.47e-01  
07-Jun-2018, 1.47e-01  
07-Jun-2018 01:00:00, 1.47e-01  
07-Jun-2018 02:00:00, 1.47e-01  
07-Jun-2018 03:00:00, 1.47e-01  
07-Jun-2018 04:00:00, 1.47e-01  
07-Jun-2018 05:00:00, 1.47e-01  
07-Jun-2018 06:00:00, 1.47e-01  
07-Jun-2018 07:00:00, 1.47e-01  
07-Jun-2018 08:00:00, 1.47e-01  
07-Jun-2018 09:00:00, 1.47e-01  
07-Jun-2018 10:00:00, 1.47e-01  
07-Jun-2018 11:00:00, 1.47e-01  
07-Jun-2018 12:00:00, 1.47e-01  
07-Jun-2018 13:00:00, 1.47e-01  
07-Jun-2018 14:00:00, 1.46e-01  
07-Jun-2018 15:00:00, 1.45e-01  
07-Jun-2018 16:00:00, 1.45e-01  
07-Jun-2018 17:00:00, 1.45e-01  
07-Jun-2018 18:00:00, 1.45e-01  
07-Jun-2018 19:00:00, 1.45e-01  
07-Jun-2018 20:00:00, 1.45e-01  
07-Jun-2018 21:00:00, 1.45e-01  
07-Jun-2018 22:00:00, 1.45e-01  
07-Jun-2018 23:00:00, 1.45e-01  
08-Jun-2018, 1.45e-01  
08-Jun-2018 01:00:00, 1.45e-01  
08-Jun-2018 02:00:00, 1.45e-01  
08-Jun-2018 03:00:00, 1.45e-01  
08-Jun-2018 04:00:00, 1.45e-01  
08-Jun-2018 05:00:00, 1.45e-01  
08-Jun-2018 06:00:00, 1.45e-01  
08-Jun-2018 07:00:00, 1.45e-01  
08-Jun-2018 08:00:00, 1.45e-01  
08-Jun-2018 09:00:00, 1.45e-01  
08-Jun-2018 10:00:00, 1.45e-01  
08-Jun-2018 11:00:00, 1.45e-01  
08-Jun-2018 12:00:00, 1.45e-01  
08-Jun-2018 13:00:00, 1.45e-01  
08-Jun-2018 14:00:00, 1.45e-01  
08-Jun-2018 15:00:00, 1.45e-01

08-Jun-2018 16:00:00, 1.44e-01  
08-Jun-2018 17:00:00, 1.43e-01  
08-Jun-2018 18:00:00, 1.43e-01  
08-Jun-2018 19:00:00, 1.43e-01  
08-Jun-2018 20:00:00, 1.43e-01  
08-Jun-2018 21:00:00, 1.43e-01  
08-Jun-2018 22:00:00, 1.43e-01  
08-Jun-2018 23:00:00, 1.43e-01  
09-Jun-2018, 1.43e-01  
09-Jun-2018 01:00:00, 1.43e-01  
09-Jun-2018 02:00:00, 1.44e-01  
09-Jun-2018 03:00:00, 1.44e-01  
09-Jun-2018 04:00:00, 1.44e-01  
09-Jun-2018 05:00:00, 1.45e-01  
09-Jun-2018 06:00:00, 1.45e-01  
09-Jun-2018 07:00:00, 1.45e-01  
09-Jun-2018 08:00:00, 1.45e-01  
09-Jun-2018 09:00:00, 1.45e-01  
09-Jun-2018 10:00:00, 1.44e-01  
09-Jun-2018 11:00:00, 1.44e-01  
09-Jun-2018 12:00:00, 1.43e-01  
09-Jun-2018 13:00:00, 1.43e-01  
09-Jun-2018 14:00:00, 1.43e-01  
09-Jun-2018 15:00:00, 1.43e-01  
09-Jun-2018 16:00:00, 1.42e-01  
09-Jun-2018 17:00:00, 1.41e-01  
09-Jun-2018 18:00:00, 1.41e-01  
09-Jun-2018 19:00:00, 1.41e-01  
09-Jun-2018 20:00:00, 1.41e-01  
09-Jun-2018 21:00:00, 1.41e-01  
09-Jun-2018 22:00:00, 1.41e-01  
09-Jun-2018 23:00:00, 1.41e-01  
10-Jun-2018, 1.41e-01  
10-Jun-2018 01:00:00, 1.41e-01  
10-Jun-2018 02:00:00, 1.42e-01  
10-Jun-2018 03:00:00, 1.42e-01  
10-Jun-2018 04:00:00, 1.42e-01  
10-Jun-2018 05:00:00, 1.42e-01  
10-Jun-2018 06:00:00, 1.42e-01  
10-Jun-2018 07:00:00, 1.43e-01  
10-Jun-2018 08:00:00, 1.42e-01  
10-Jun-2018 09:00:00, 1.42e-01  
10-Jun-2018 10:00:00, 1.42e-01  
10-Jun-2018 11:00:00, 1.41e-01  
10-Jun-2018 12:00:00, 1.41e-01  
10-Jun-2018 13:00:00, 1.41e-01  
10-Jun-2018 14:00:00, 1.41e-01  
10-Jun-2018 15:00:00, 1.40e-01  
10-Jun-2018 16:00:00, 1.39e-01  
10-Jun-2018 17:00:00, 1.39e-01  
10-Jun-2018 18:00:00, 1.39e-01  
10-Jun-2018 19:00:00, 1.39e-01  
10-Jun-2018 20:00:00, 1.39e-01  
10-Jun-2018 21:00:00, 1.39e-01  
10-Jun-2018 22:00:00, 1.39e-01  
10-Jun-2018 23:00:00, 1.39e-01  
11-Jun-2018, 1.39e-01  
11-Jun-2018 01:00:00, 1.39e-01  
11-Jun-2018 02:00:00, 1.40e-01  
11-Jun-2018 03:00:00, 1.40e-01  
11-Jun-2018 04:00:00, 1.41e-01  
11-Jun-2018 05:00:00, 1.41e-01  
11-Jun-2018 06:00:00, 1.41e-01  
11-Jun-2018 07:00:00, 1.41e-01



11-Jun-2018 08:00:00, 1.41e-01  
11-Jun-2018 09:00:00, 1.41e-01  
11-Jun-2018 10:00:00, 1.41e-01  
11-Jun-2018 11:00:00, 1.40e-01  
11-Jun-2018 12:00:00, 1.39e-01  
11-Jun-2018 13:00:00, 1.39e-01  
11-Jun-2018 14:00:00, 1.39e-01  
11-Jun-2018 15:00:00, 1.39e-01  
11-Jun-2018 16:00:00, 1.38e-01  
11-Jun-2018 17:00:00, 1.37e-01  
11-Jun-2018 18:00:00, 1.37e-01  
11-Jun-2018 19:00:00, 1.37e-01  
11-Jun-2018 20:00:00, 1.37e-01  
11-Jun-2018 21:00:00, 1.37e-01  
11-Jun-2018 22:00:00, 1.37e-01  
11-Jun-2018 23:00:00, 1.37e-01  
12-Jun-2018, 1.37e-01  
12-Jun-2018 01:00:00, 1.38e-01  
12-Jun-2018 02:00:00, 1.38e-01  
12-Jun-2018 03:00:00, 1.39e-01  
12-Jun-2018 04:00:00, 1.39e-01  
12-Jun-2018 05:00:00, 1.39e-01  
12-Jun-2018 06:00:00, 1.39e-01  
12-Jun-2018 07:00:00, 1.39e-01  
12-Jun-2018 08:00:00, 1.39e-01  
12-Jun-2018 09:00:00, 1.39e-01  
12-Jun-2018 10:00:00, 1.39e-01  
12-Jun-2018 11:00:00, 1.38e-01  
12-Jun-2018 12:00:00, 1.37e-01  
12-Jun-2018 13:00:00, 1.37e-01  
12-Jun-2018 14:00:00, 1.37e-01  
12-Jun-2018 15:00:00, 1.36e-01  
12-Jun-2018 16:00:00, 1.36e-01  
12-Jun-2018 17:00:00, 1.35e-01  
12-Jun-2018 18:00:00, 1.35e-01  
12-Jun-2018 19:00:00, 1.35e-01  
12-Jun-2018 20:00:00, 1.35e-01  
12-Jun-2018 21:00:00, 1.35e-01  
12-Jun-2018 22:00:00, 1.35e-01  
12-Jun-2018 23:00:00, 1.36e-01  
13-Jun-2018, 1.36e-01  
13-Jun-2018 01:00:00, 1.36e-01  
13-Jun-2018 02:00:00, 1.36e-01  
13-Jun-2018 03:00:00, 1.37e-01  
13-Jun-2018 04:00:00, 1.37e-01  
13-Jun-2018 05:00:00, 1.37e-01  
13-Jun-2018 06:00:00, 1.37e-01  
13-Jun-2018 07:00:00, 1.37e-01  
13-Jun-2018 08:00:00, 1.37e-01  
13-Jun-2018 09:00:00, 1.37e-01  
13-Jun-2018 10:00:00, 1.36e-01  
13-Jun-2018 11:00:00, 1.36e-01  
13-Jun-2018 12:00:00, 1.35e-01  
13-Jun-2018 13:00:00, 1.35e-01  
13-Jun-2018 14:00:00, 1.34e-01  
13-Jun-2018 15:00:00, 1.33e-01  
13-Jun-2018 16:00:00, 1.33e-01  
13-Jun-2018 17:00:00, 1.33e-01  
13-Jun-2018 18:00:00, 1.33e-01  
13-Jun-2018 19:00:00, 1.33e-01  
13-Jun-2018 20:00:00, 1.33e-01  
13-Jun-2018 21:00:00, 1.33e-01  
13-Jun-2018 22:00:00, 1.33e-01  
13-Jun-2018 23:00:00, 1.33e-01

14-Jun-2018, 1.33e-01  
14-Jun-2018 01:00:00, 1.33e-01  
14-Jun-2018 02:00:00, 1.33e-01  
14-Jun-2018 03:00:00, 1.33e-01  
14-Jun-2018 04:00:00, 1.33e-01  
14-Jun-2018 05:00:00, 1.33e-01  
14-Jun-2018 06:00:00, 1.33e-01  
14-Jun-2018 07:00:00, 1.33e-01  
14-Jun-2018 08:00:00, 1.33e-01  
14-Jun-2018 09:00:00, 1.33e-01  
14-Jun-2018 10:00:00, 1.33e-01  
14-Jun-2018 11:00:00, 1.33e-01  
14-Jun-2018 12:00:00, 1.33e-01  
14-Jun-2018 13:00:00, 1.32e-01  
14-Jun-2018 14:00:00, 1.31e-01  
14-Jun-2018 15:00:00, 1.31e-01  
14-Jun-2018 16:00:00, 1.31e-01  
14-Jun-2018 17:00:00, 1.30e-01  
14-Jun-2018 18:00:00, 1.30e-01  
14-Jun-2018 19:00:00, 1.29e-01  
14-Jun-2018 20:00:00, 1.29e-01  
14-Jun-2018 21:00:00, 1.30e-01  
14-Jun-2018 22:00:00, 1.30e-01  
14-Jun-2018 23:00:00, 1.31e-01  
15-Jun-2018, 1.31e-01  
15-Jun-2018 01:00:00, 1.31e-01  
15-Jun-2018 02:00:00, 1.31e-01  
15-Jun-2018 03:00:00, 1.31e-01  
15-Jun-2018 04:00:00, 1.31e-01  
15-Jun-2018 05:00:00, 1.31e-01  
15-Jun-2018 06:00:00, 1.31e-01  
15-Jun-2018 07:00:00, 1.31e-01  
15-Jun-2018 08:00:00, 1.31e-01  
15-Jun-2018 09:00:00, 1.31e-01  
15-Jun-2018 10:00:00, 1.31e-01  
15-Jun-2018 11:00:00, 1.31e-01  
15-Jun-2018 12:00:00, 1.31e-01  
15-Jun-2018 13:00:00, 1.29e-01  
15-Jun-2018 14:00:00, 1.29e-01  
15-Jun-2018 15:00:00, 1.29e-01  
15-Jun-2018 16:00:00, 1.29e-01  
15-Jun-2018 17:00:00, 1.29e-01  
15-Jun-2018 18:00:00, 1.29e-01  
15-Jun-2018 19:00:00, 1.28e-01  
15-Jun-2018 20:00:00, 1.29e-01  
15-Jun-2018 21:00:00, 1.29e-01  
15-Jun-2018 22:00:00, 1.29e-01  
15-Jun-2018 23:00:00, 1.29e-01  
16-Jun-2018, 1.29e-01  
16-Jun-2018 01:00:00, 1.29e-01  
16-Jun-2018 02:00:00, 1.29e-01  
16-Jun-2018 03:00:00, 1.29e-01  
16-Jun-2018 04:00:00, 1.29e-01  
16-Jun-2018 05:00:00, 1.29e-01  
16-Jun-2018 06:00:00, 1.30e-01  
16-Jun-2018 07:00:00, 1.30e-01  
16-Jun-2018 08:00:00, 1.30e-01  
16-Jun-2018 09:00:00, 1.30e-01  
16-Jun-2018 10:00:00, 1.29e-01  
16-Jun-2018 11:00:00, 1.29e-01  
16-Jun-2018 12:00:00, 1.29e-01  
16-Jun-2018 13:00:00, 1.29e-01  
16-Jun-2018 14:00:00, 1.33e-01  
16-Jun-2018 15:00:00, 1.30e-01

16-Jun-2018 16:00:00, 1.29e-01  
16-Jun-2018 17:00:00, 1.29e-01  
16-Jun-2018 18:00:00, 1.29e-01  
16-Jun-2018 19:00:00, 1.29e-01  
16-Jun-2018 20:00:00, 1.29e-01  
16-Jun-2018 21:00:00, 1.31e-01  
16-Jun-2018 22:00:00, 1.33e-01  
16-Jun-2018 23:00:00, 1.32e-01  
17-Jun-2018, 1.32e-01  
17-Jun-2018 01:00:00, 1.33e-01  
17-Jun-2018 02:00:00, 1.33e-01  
17-Jun-2018 03:00:00, 1.33e-01  
17-Jun-2018 04:00:00, 1.33e-01  
17-Jun-2018 05:00:00, 1.33e-01  
17-Jun-2018 06:00:00, 1.33e-01  
17-Jun-2018 07:00:00, 1.33e-01  
17-Jun-2018 08:00:00, 1.34e-01  
17-Jun-2018 09:00:00, 1.34e-01  
17-Jun-2018 10:00:00, 1.33e-01  
17-Jun-2018 11:00:00, 1.34e-01  
17-Jun-2018 12:00:00, 1.33e-01  
17-Jun-2018 13:00:00, 1.31e-01  
17-Jun-2018 14:00:00, 1.31e-01  
17-Jun-2018 15:00:00, 1.30e-01  
17-Jun-2018 16:00:00, 1.30e-01  
17-Jun-2018 17:00:00, 1.29e-01  
17-Jun-2018 18:00:00, 1.30e-01  
17-Jun-2018 19:00:00, 1.30e-01  
17-Jun-2018 20:00:00, 1.30e-01  
17-Jun-2018 21:00:00, 1.30e-01  
17-Jun-2018 22:00:00, 1.30e-01  
17-Jun-2018 23:00:00, 1.30e-01  
18-Jun-2018, 1.31e-01  
18-Jun-2018 01:00:00, 1.33e-01  
18-Jun-2018 02:00:00, 1.33e-01  
18-Jun-2018 03:00:00, 1.33e-01  
18-Jun-2018 04:00:00, 1.33e-01  
18-Jun-2018 05:00:00, 1.33e-01  
18-Jun-2018 06:00:00, 1.33e-01  
18-Jun-2018 07:00:00, 1.33e-01  
18-Jun-2018 08:00:00, 1.33e-01  
18-Jun-2018 09:00:00, 1.32e-01  
18-Jun-2018 10:00:00, 1.31e-01  
18-Jun-2018 11:00:00, 1.31e-01  
18-Jun-2018 12:00:00, 1.31e-01  
18-Jun-2018 13:00:00, 1.30e-01  
18-Jun-2018 14:00:00, 1.29e-01  
18-Jun-2018 15:00:00, 1.29e-01  
18-Jun-2018 16:00:00, 1.29e-01  
18-Jun-2018 17:00:00, 1.28e-01  
18-Jun-2018 18:00:00, 1.28e-01  
18-Jun-2018 19:00:00, 1.27e-01  
18-Jun-2018 20:00:00, 1.27e-01  
18-Jun-2018 21:00:00, 1.27e-01  
18-Jun-2018 22:00:00, 1.27e-01  
18-Jun-2018 23:00:00, 1.27e-01  
19-Jun-2018, 1.28e-01  
19-Jun-2018 01:00:00, 1.28e-01  
19-Jun-2018 02:00:00, 1.28e-01  
19-Jun-2018 03:00:00, 1.29e-01  
19-Jun-2018 04:00:00, 1.29e-01  
19-Jun-2018 05:00:00, 1.29e-01  
19-Jun-2018 06:00:00, 1.29e-01  
19-Jun-2018 07:00:00, 1.29e-01

19-Jun-2018 08:00:00, 1.29e-01  
19-Jun-2018 09:00:00, 1.29e-01  
19-Jun-2018 10:00:00, 1.29e-01  
19-Jun-2018 11:00:00, 1.28e-01  
19-Jun-2018 12:00:00, 1.27e-01  
19-Jun-2018 13:00:00, 1.27e-01  
19-Jun-2018 14:00:00, 1.27e-01  
19-Jun-2018 15:00:00, 1.27e-01  
19-Jun-2018 16:00:00, 1.26e-01  
19-Jun-2018 17:00:00, 1.25e-01  
19-Jun-2018 18:00:00, 1.25e-01  
19-Jun-2018 19:00:00, 1.25e-01  
19-Jun-2018 20:00:00, 1.25e-01  
19-Jun-2018 21:00:00, 1.25e-01  
19-Jun-2018 22:00:00, 1.25e-01  
19-Jun-2018 23:00:00, 1.25e-01  
20-Jun-2018, 1.25e-01  
20-Jun-2018 01:00:00, 1.25e-01  
20-Jun-2018 02:00:00, 1.25e-01  
20-Jun-2018 03:00:00, 1.25e-01  
20-Jun-2018 04:00:00, 1.25e-01  
20-Jun-2018 05:00:00, 1.26e-01  
20-Jun-2018 06:00:00, 1.26e-01  
20-Jun-2018 07:00:00, 1.26e-01  
20-Jun-2018 08:00:00, 1.26e-01  
20-Jun-2018 09:00:00, 1.26e-01  
20-Jun-2018 10:00:00, 1.26e-01  
20-Jun-2018 11:00:00, 1.25e-01  
20-Jun-2018 12:00:00, 1.25e-01  
20-Jun-2018 13:00:00, 1.25e-01  
20-Jun-2018 14:00:00, 1.25e-01  
20-Jun-2018 15:00:00, 1.24e-01  
20-Jun-2018 16:00:00, 1.23e-01  
20-Jun-2018 17:00:00, 1.23e-01  
20-Jun-2018 18:00:00, 1.23e-01  
20-Jun-2018 19:00:00, 1.22e-01  
20-Jun-2018 20:00:00, 1.22e-01  
20-Jun-2018 21:00:00, 1.22e-01  
20-Jun-2018 22:00:00, 1.23e-01  
20-Jun-2018 23:00:00, 1.23e-01  
21-Jun-2018, 1.23e-01  
21-Jun-2018 01:00:00, 1.23e-01  
21-Jun-2018 02:00:00, 1.23e-01  
21-Jun-2018 03:00:00, 1.23e-01  
21-Jun-2018 04:00:00, 1.24e-01  
21-Jun-2018 05:00:00, 1.24e-01  
21-Jun-2018 06:00:00, 1.25e-01  
21-Jun-2018 07:00:00, 1.25e-01  
21-Jun-2018 08:00:00, 1.25e-01  
21-Jun-2018 09:00:00, 1.24e-01  
21-Jun-2018 10:00:00, 1.24e-01  
21-Jun-2018 11:00:00, 1.23e-01  
21-Jun-2018 12:00:00, 1.23e-01  
21-Jun-2018 13:00:00, 1.22e-01  
21-Jun-2018 14:00:00, 1.21e-01  
21-Jun-2018 15:00:00, 1.21e-01  
21-Jun-2018 16:00:00, 1.21e-01  
21-Jun-2018 17:00:00, 1.20e-01  
21-Jun-2018 18:00:00, 1.20e-01  
21-Jun-2018 19:00:00, 1.19e-01  
21-Jun-2018 20:00:00, 1.19e-01  
21-Jun-2018 21:00:00, 1.19e-01  
21-Jun-2018 22:00:00, 1.19e-01  
21-Jun-2018 23:00:00, 1.19e-01

22-Jun-2018, 1.20e-01  
22-Jun-2018 01:00:00, 1.20e-01  
22-Jun-2018 02:00:00, 1.20e-01  
22-Jun-2018 03:00:00, 1.20e-01  
22-Jun-2018 04:00:00, 1.21e-01  
22-Jun-2018 05:00:00, 1.21e-01  
22-Jun-2018 06:00:00, 1.21e-01  
22-Jun-2018 07:00:00, 1.21e-01  
22-Jun-2018 08:00:00, 1.21e-01  
22-Jun-2018 09:00:00, 1.21e-01  
22-Jun-2018 10:00:00, 1.20e-01  
22-Jun-2018 11:00:00, 1.20e-01  
22-Jun-2018 12:00:00, 1.19e-01  
22-Jun-2018 13:00:00, 1.18e-01  
22-Jun-2018 14:00:00, 1.18e-01  
22-Jun-2018 15:00:00, 1.18e-01  
22-Jun-2018 16:00:00, 1.17e-01  
22-Jun-2018 17:00:00, 1.17e-01  
22-Jun-2018 18:00:00, 1.17e-01  
22-Jun-2018 19:00:00, 1.17e-01  
22-Jun-2018 20:00:00, 1.17e-01  
22-Jun-2018 21:00:00, 1.17e-01  
22-Jun-2018 22:00:00, 1.17e-01  
22-Jun-2018 23:00:00, 1.17e-01  
23-Jun-2018, 1.17e-01  
23-Jun-2018 01:00:00, 1.17e-01  
23-Jun-2018 02:00:00, 1.18e-01  
23-Jun-2018 03:00:00, 1.18e-01  
23-Jun-2018 04:00:00, 1.18e-01  
23-Jun-2018 05:00:00, 1.18e-01  
23-Jun-2018 06:00:00, 1.18e-01  
23-Jun-2018 07:00:00, 1.18e-01  
23-Jun-2018 08:00:00, 1.18e-01  
23-Jun-2018 09:00:00, 1.18e-01  
23-Jun-2018 10:00:00, 1.18e-01  
23-Jun-2018 11:00:00, 1.17e-01  
23-Jun-2018 12:00:00, 1.17e-01  
23-Jun-2018 13:00:00, 1.17e-01  
23-Jun-2018 14:00:00, 1.16e-01  
23-Jun-2018 15:00:00, 1.15e-01  
23-Jun-2018 16:00:00, 1.15e-01  
23-Jun-2018 17:00:00, 1.14e-01  
23-Jun-2018 18:00:00, 1.14e-01  
23-Jun-2018 19:00:00, 1.14e-01  
23-Jun-2018 20:00:00, 1.14e-01  
23-Jun-2018 21:00:00, 1.14e-01  
23-Jun-2018 22:00:00, 1.14e-01  
23-Jun-2018 23:00:00, 1.14e-01  
24-Jun-2018, 1.14e-01  
24-Jun-2018 01:00:00, 1.14e-01  
24-Jun-2018 02:00:00, 1.14e-01  
24-Jun-2018 03:00:00, 1.14e-01  
24-Jun-2018 04:00:00, 1.15e-01  
24-Jun-2018 05:00:00, 1.15e-01  
24-Jun-2018 06:00:00, 1.15e-01  
24-Jun-2018 07:00:00, 1.15e-01  
24-Jun-2018 08:00:00, 1.15e-01  
24-Jun-2018 09:00:00, 1.15e-01  
24-Jun-2018 10:00:00, 1.14e-01  
24-Jun-2018 11:00:00, 1.14e-01  
24-Jun-2018 12:00:00, 1.14e-01  
24-Jun-2018 13:00:00, 1.13e-01  
24-Jun-2018 14:00:00, 1.12e-01  
24-Jun-2018 15:00:00, 1.12e-01

24-Jun-2018 16:00:00, 1.12e-01  
24-Jun-2018 17:00:00, 1.12e-01  
24-Jun-2018 18:00:00, 1.12e-01  
24-Jun-2018 19:00:00, 1.12e-01  
24-Jun-2018 20:00:00, 1.12e-01  
24-Jun-2018 21:00:00, 1.12e-01  
24-Jun-2018 22:00:00, 1.12e-01  
24-Jun-2018 23:00:00, 1.12e-01  
25-Jun-2018, 1.12e-01  
25-Jun-2018 01:00:00, 1.12e-01  
25-Jun-2018 02:00:00, 1.12e-01  
25-Jun-2018 03:00:00, 1.12e-01  
25-Jun-2018 04:00:00, 1.12e-01  
25-Jun-2018 05:00:00, 1.12e-01  
25-Jun-2018 06:00:00, 1.12e-01  
25-Jun-2018 07:00:00, 1.12e-01  
25-Jun-2018 08:00:00, 1.12e-01  
25-Jun-2018 09:00:00, 1.12e-01  
25-Jun-2018 10:00:00, 1.12e-01  
25-Jun-2018 11:00:00, 1.12e-01  
25-Jun-2018 12:00:00, 1.12e-01  
25-Jun-2018 13:00:00, 1.11e-01  
25-Jun-2018 14:00:00, 1.11e-01  
25-Jun-2018 15:00:00, 1.10e-01  
25-Jun-2018 16:00:00, 1.10e-01  
25-Jun-2018 17:00:00, 1.09e-01  
25-Jun-2018 18:00:00, 1.09e-01  
25-Jun-2018 19:00:00, 1.08e-01  
25-Jun-2018 20:00:00, 1.08e-01  
25-Jun-2018 21:00:00, 1.08e-01  
25-Jun-2018 22:00:00, 1.08e-01  
25-Jun-2018 23:00:00, 1.09e-01  
26-Jun-2018, 1.09e-01  
26-Jun-2018 01:00:00, 1.09e-01  
26-Jun-2018 02:00:00, 1.09e-01  
26-Jun-2018 03:00:00, 1.09e-01  
26-Jun-2018 04:00:00, 1.10e-01  
26-Jun-2018 05:00:00, 1.10e-01  
26-Jun-2018 06:00:00, 1.10e-01  
26-Jun-2018 07:00:00, 1.10e-01  
26-Jun-2018 08:00:00, 1.09e-01  
26-Jun-2018 09:00:00, 1.09e-01  
26-Jun-2018 10:00:00, 1.09e-01  
26-Jun-2018 11:00:00, 1.08e-01  
26-Jun-2018 12:00:00, 1.08e-01  
26-Jun-2018 13:00:00, 1.08e-01  
26-Jun-2018 14:00:00, 1.08e-01  
26-Jun-2018 15:00:00, 1.07e-01  
26-Jun-2018 16:00:00, 1.07e-01  
26-Jun-2018 17:00:00, 1.07e-01  
26-Jun-2018 18:00:00, 1.07e-01  
26-Jun-2018 19:00:00, 1.06e-01  
26-Jun-2018 20:00:00, 1.06e-01  
26-Jun-2018 21:00:00, 1.06e-01  
26-Jun-2018 22:00:00, 1.06e-01  
26-Jun-2018 23:00:00, 1.06e-01  
27-Jun-2018, 1.06e-01  
27-Jun-2018 01:00:00, 1.07e-01  
27-Jun-2018 02:00:00, 1.07e-01  
27-Jun-2018 03:00:00, 1.07e-01  
27-Jun-2018 04:00:00, 1.07e-01  
27-Jun-2018 05:00:00, 1.07e-01  
27-Jun-2018 06:00:00, 1.07e-01  
27-Jun-2018 07:00:00, 1.07e-01

27-Jun-2018 08:00:00, 1.07e-01  
27-Jun-2018 09:00:00, 1.07e-01  
27-Jun-2018 10:00:00, 1.06e-01  
27-Jun-2018 11:00:00, 1.06e-01  
27-Jun-2018 12:00:00, 1.05e-01  
27-Jun-2018 13:00:00, 1.05e-01  
27-Jun-2018 14:00:00, 1.04e-01  
27-Jun-2018 15:00:00, 1.04e-01  
27-Jun-2018 16:00:00, 1.04e-01  
27-Jun-2018 17:00:00, 1.04e-01  
27-Jun-2018 18:00:00, 1.03e-01  
27-Jun-2018 19:00:00, 1.03e-01  
27-Jun-2018 20:00:00, 1.02e-01  
27-Jun-2018 21:00:00, 1.02e-01  
27-Jun-2018 22:00:00, 1.02e-01  
27-Jun-2018 23:00:00, 1.03e-01  
28-Jun-2018, 1.03e-01  
28-Jun-2018 01:00:00, 1.03e-01  
28-Jun-2018 02:00:00, 1.03e-01  
28-Jun-2018 03:00:00, 1.03e-01  
28-Jun-2018 04:00:00, 1.03e-01  
28-Jun-2018 05:00:00, 1.03e-01  
28-Jun-2018 06:00:00, 1.04e-01  
28-Jun-2018 07:00:00, 1.04e-01  
28-Jun-2018 08:00:00, 1.04e-01  
28-Jun-2018 09:00:00, 1.04e-01  
28-Jun-2018 10:00:00, 1.03e-01  
28-Jun-2018 11:00:00, 1.03e-01  
28-Jun-2018 12:00:00, 1.02e-01  
28-Jun-2018 13:00:00, 1.02e-01  
28-Jun-2018 14:00:00, 1.02e-01  
28-Jun-2018 15:00:00, 1.02e-01  
28-Jun-2018 16:00:00, 1.01e-01  
28-Jun-2018 17:00:00, 1.01e-01  
28-Jun-2018 18:00:00, 1.01e-01  
28-Jun-2018 19:00:00, 1.01e-01  
28-Jun-2018 20:00:00, 1.01e-01  
28-Jun-2018 21:00:00, 1.01e-01  
28-Jun-2018 22:00:00, 1.01e-01  
28-Jun-2018 23:00:00, 1.01e-01  
29-Jun-2018, 1.01e-01  
29-Jun-2018 01:00:00, 1.01e-01  
29-Jun-2018 02:00:00, 1.01e-01  
29-Jun-2018 03:00:00, 1.01e-01  
29-Jun-2018 04:00:00, 1.01e-01  
29-Jun-2018 05:00:00, 1.01e-01  
29-Jun-2018 06:00:00, 1.01e-01  
29-Jun-2018 07:00:00, 1.01e-01  
29-Jun-2018 08:00:00, 1.02e-01  
29-Jun-2018 09:00:00, 1.02e-01  
29-Jun-2018 10:00:00, 1.01e-01  
29-Jun-2018 11:00:00, 1.01e-01  
29-Jun-2018 12:00:00, 1.01e-01  
29-Jun-2018 13:00:00, 1.01e-01  
29-Jun-2018 14:00:00, 1.01e-01  
29-Jun-2018 15:00:00, 1.00e-01  
29-Jun-2018 16:00:00, 1.00e-01  
29-Jun-2018 17:00:00, 9.90e-02  
29-Jun-2018 18:00:00, 9.90e-02  
29-Jun-2018 19:00:00, 9.90e-02  
29-Jun-2018 20:00:00, 9.90e-02  
29-Jun-2018 21:00:00, 9.90e-02  
29-Jun-2018 22:00:00, 9.90e-02  
29-Jun-2018 23:00:00, 9.90e-02

30-Jun-2018, 9.90e-02  
30-Jun-2018 01:00:00, 9.90e-02  
30-Jun-2018 02:00:00, 9.90e-02  
30-Jun-2018 03:00:00, 1.00e-01  
30-Jun-2018 04:00:00, 1.00e-01  
30-Jun-2018 05:00:00, 1.00e-01  
30-Jun-2018 06:00:00, 1.00e-01  
30-Jun-2018 07:00:00, 1.00e-01  
30-Jun-2018 08:00:00, 1.00e-01  
30-Jun-2018 09:00:00, 1.00e-01  
30-Jun-2018 10:00:00, 1.00e-01  
30-Jun-2018 11:00:00, 9.90e-02  
30-Jun-2018 12:00:00, 9.90e-02  
30-Jun-2018 13:00:00, 9.80e-02  
30-Jun-2018 14:00:00, 9.80e-02  
30-Jun-2018 15:00:00, 9.80e-02  
30-Jun-2018 16:00:00, 9.80e-02  
30-Jun-2018 17:00:00, 9.70e-02  
30-Jun-2018 18:00:00, 9.70e-02  
30-Jun-2018 19:00:00, 9.70e-02  
30-Jun-2018 20:00:00, 9.70e-02  
30-Jun-2018 21:00:00, 9.70e-02  
30-Jun-2018 22:00:00, 9.70e-02  
30-Jun-2018 23:00:00, 9.80e-02  
01-Jul-2018, 9.80e-02  
01-Jul-2018 01:00:00, 9.80e-02  
01-Jul-2018 02:00:00, 9.80e-02  
01-Jul-2018 03:00:00, 9.80e-02  
01-Jul-2018 04:00:00, 9.80e-02  
01-Jul-2018 05:00:00, 9.80e-02  
01-Jul-2018 06:00:00, 9.80e-02  
01-Jul-2018 07:00:00, 9.80e-02  
01-Jul-2018 08:00:00, 9.80e-02  
01-Jul-2018 09:00:00, 9.80e-02  
01-Jul-2018 10:00:00, 9.80e-02  
01-Jul-2018 11:00:00, 9.80e-02  
01-Jul-2018 12:00:00, 9.70e-02  
01-Jul-2018 13:00:00, 9.70e-02  
01-Jul-2018 14:00:00, 9.60e-02  
01-Jul-2018 15:00:00, 9.60e-02  
01-Jul-2018 16:00:00, 9.60e-02  
01-Jul-2018 17:00:00, 9.60e-02  
01-Jul-2018 18:00:00, 9.60e-02  
01-Jul-2018 19:00:00, 9.60e-02  
01-Jul-2018 20:00:00, 9.60e-02  
01-Jul-2018 21:00:00, 9.60e-02  
01-Jul-2018 22:00:00, 9.60e-02  
01-Jul-2018 23:00:00, 9.60e-02  
02-Jul-2018, 9.60e-02  
02-Jul-2018 01:00:00, 9.60e-02  
02-Jul-2018 02:00:00, 9.60e-02  
02-Jul-2018 03:00:00, 9.60e-02  
02-Jul-2018 04:00:00, 9.60e-02  
02-Jul-2018 05:00:00, 9.60e-02  
02-Jul-2018 06:00:00, 9.70e-02  
02-Jul-2018 07:00:00, 9.70e-02  
02-Jul-2018 08:00:00, 9.60e-02  
02-Jul-2018 09:00:00, 9.60e-02  
02-Jul-2018 10:00:00, 9.60e-02  
02-Jul-2018 11:00:00, 9.60e-02  
02-Jul-2018 12:00:00, 9.60e-02  
02-Jul-2018 13:00:00, 9.60e-02  
02-Jul-2018 14:00:00, 9.50e-02  
02-Jul-2018 15:00:00, 9.50e-02



02-Jul-2018 16:00:00, 9.40e-02  
02-Jul-2018 17:00:00, 9.40e-02  
02-Jul-2018 18:00:00, 9.40e-02  
02-Jul-2018 19:00:00, 9.40e-02  
02-Jul-2018 20:00:00, 9.40e-02  
02-Jul-2018 21:00:00, 9.40e-02  
02-Jul-2018 22:00:00, 9.40e-02  
02-Jul-2018 23:00:00, 9.40e-02  
03-Jul-2018, 9.50e-02  
03-Jul-2018 01:00:00, 9.50e-02  
03-Jul-2018 02:00:00, 9.50e-02  
03-Jul-2018 03:00:00, 9.60e-02  
03-Jul-2018 04:00:00, 9.60e-02  
03-Jul-2018 05:00:00, 9.60e-02  
03-Jul-2018 06:00:00, 9.60e-02  
03-Jul-2018 07:00:00, 9.60e-02  
03-Jul-2018 08:00:00, 9.60e-02  
03-Jul-2018 09:00:00, 9.60e-02  
03-Jul-2018 10:00:00, 9.50e-02  
03-Jul-2018 11:00:00, 9.50e-02  
03-Jul-2018 12:00:00, 9.40e-02  
03-Jul-2018 13:00:00, 9.40e-02  
03-Jul-2018 14:00:00, 9.40e-02  
03-Jul-2018 15:00:00, 9.40e-02  
03-Jul-2018 16:00:00, 9.40e-02  
03-Jul-2018 17:00:00, 9.40e-02  
03-Jul-2018 18:00:00, 9.40e-02  
03-Jul-2018 19:00:00, 9.40e-02  
03-Jul-2018 20:00:00, 9.40e-02  
03-Jul-2018 21:00:00, 9.40e-02  
03-Jul-2018 22:00:00, 9.40e-02  
03-Jul-2018 23:00:00, 9.40e-02  
04-Jul-2018, 9.40e-02  
04-Jul-2018 01:00:00, 9.40e-02  
04-Jul-2018 02:00:00, 9.40e-02  
04-Jul-2018 03:00:00, 9.40e-02  
04-Jul-2018 04:00:00, 9.50e-02  
04-Jul-2018 05:00:00, 9.50e-02  
04-Jul-2018 06:00:00, 9.50e-02  
04-Jul-2018 07:00:00, 9.50e-02  
04-Jul-2018 08:00:00, 9.50e-02  
04-Jul-2018 09:00:00, 9.50e-02  
04-Jul-2018 10:00:00, 9.40e-02  
04-Jul-2018 11:00:00, 9.40e-02  
04-Jul-2018 12:00:00, 9.40e-02  
04-Jul-2018 13:00:00, 9.40e-02  
04-Jul-2018 14:00:00, 9.30e-02  
04-Jul-2018 15:00:00, 9.30e-02  
04-Jul-2018 16:00:00, 9.30e-02  
04-Jul-2018 17:00:00, 9.30e-02  
04-Jul-2018 18:00:00, 9.30e-02  
04-Jul-2018 19:00:00, 9.30e-02  
04-Jul-2018 20:00:00, 9.30e-02  
04-Jul-2018 21:00:00, 9.30e-02  
04-Jul-2018 22:00:00, 9.30e-02  
04-Jul-2018 23:00:00, 9.30e-02  
05-Jul-2018, 9.30e-02  
05-Jul-2018 01:00:00, 9.30e-02  
05-Jul-2018 02:00:00, 9.40e-02  
05-Jul-2018 03:00:00, 9.40e-02  
05-Jul-2018 04:00:00, 9.40e-02  
05-Jul-2018 05:00:00, 9.40e-02  
05-Jul-2018 06:00:00, 9.40e-02  
05-Jul-2018 07:00:00, 9.40e-02

05-Jul-2018 08:00:00, 9.40e-02  
05-Jul-2018 09:00:00, 9.40e-02  
05-Jul-2018 10:00:00, 9.40e-02  
05-Jul-2018 11:00:00, 9.30e-02  
05-Jul-2018 12:00:00, 9.30e-02  
05-Jul-2018 13:00:00, 9.30e-02  
05-Jul-2018 14:00:00, 9.30e-02  
05-Jul-2018 15:00:00, 9.30e-02  
05-Jul-2018 16:00:00, 9.30e-02  
05-Jul-2018 17:00:00, 9.30e-02  
05-Jul-2018 18:00:00, 9.30e-02  
05-Jul-2018 19:00:00, 9.30e-02  
05-Jul-2018 20:00:00, 9.30e-02  
05-Jul-2018 21:00:00, 9.30e-02  
05-Jul-2018 22:00:00, 9.30e-02  
05-Jul-2018 23:00:00, 9.30e-02  
06-Jul-2018, 9.30e-02  
06-Jul-2018 01:00:00, 9.30e-02  
06-Jul-2018 02:00:00, 9.30e-02  
06-Jul-2018 03:00:00, 9.30e-02  
06-Jul-2018 04:00:00, 9.30e-02  
06-Jul-2018 05:00:00, 9.30e-02  
06-Jul-2018 06:00:00, 9.40e-02  
06-Jul-2018 07:00:00, 9.40e-02  
06-Jul-2018 08:00:00, 9.40e-02  
06-Jul-2018 09:00:00, 9.30e-02  
06-Jul-2018 10:00:00, 9.30e-02  
06-Jul-2018 11:00:00, 9.30e-02  
06-Jul-2018 12:00:00, 9.30e-02  
06-Jul-2018 13:00:00, 9.30e-02  
06-Jul-2018 14:00:00, 9.20e-02  
06-Jul-2018 15:00:00, 9.10e-02  
06-Jul-2018 16:00:00, 9.10e-02  
06-Jul-2018 17:00:00, 9.10e-02  
06-Jul-2018 18:00:00, 9.10e-02  
06-Jul-2018 19:00:00, 9.10e-02  
06-Jul-2018 20:00:00, 9.10e-02  
06-Jul-2018 21:00:00, 9.10e-02  
06-Jul-2018 22:00:00, 9.10e-02  
06-Jul-2018 23:00:00, 9.20e-02  
07-Jul-2018, 9.20e-02  
07-Jul-2018 01:00:00, 9.20e-02  
07-Jul-2018 02:00:00, 9.30e-02  
07-Jul-2018 03:00:00, 9.30e-02  
07-Jul-2018 04:00:00, 9.30e-02  
07-Jul-2018 05:00:00, 9.30e-02  
07-Jul-2018 06:00:00, 9.30e-02  
07-Jul-2018 07:00:00, 9.30e-02  
07-Jul-2018 08:00:00, 9.30e-02  
07-Jul-2018 09:00:00, 9.30e-02  
07-Jul-2018 10:00:00, 9.30e-02  
07-Jul-2018 11:00:00, 9.30e-02  
07-Jul-2018 12:00:00, 9.20e-02  
07-Jul-2018 13:00:00, 9.10e-02  
07-Jul-2018 14:00:00, 9.10e-02  
07-Jul-2018 15:00:00, 9.10e-02  
07-Jul-2018 16:00:00, 9.10e-02  
07-Jul-2018 17:00:00, 9.10e-02  
07-Jul-2018 18:00:00, 9.10e-02  
07-Jul-2018 19:00:00, 9.20e-02  
07-Jul-2018 20:00:00, 9.20e-02  
07-Jul-2018 21:00:00, 9.10e-02  
07-Jul-2018 22:00:00, 9.10e-02  
07-Jul-2018 23:00:00, 9.10e-02

08-Jul-2018, 9.10e-02  
08-Jul-2018 01:00:00, 9.10e-02  
08-Jul-2018 02:00:00, 9.10e-02  
08-Jul-2018 03:00:00, 9.20e-02  
08-Jul-2018 04:00:00, 9.20e-02  
08-Jul-2018 05:00:00, 9.20e-02  
08-Jul-2018 06:00:00, 9.30e-02  
08-Jul-2018 07:00:00, 9.30e-02  
08-Jul-2018 08:00:00, 9.30e-02  
08-Jul-2018 09:00:00, 9.30e-02  
08-Jul-2018 10:00:00, 9.30e-02  
08-Jul-2018 11:00:00, 9.20e-02  
08-Jul-2018 12:00:00, 9.10e-02  
08-Jul-2018 13:00:00, 9.10e-02  
08-Jul-2018 14:00:00, 9.10e-02  
08-Jul-2018 15:00:00, 9.10e-02  
08-Jul-2018 16:00:00, 9.30e-02  
08-Jul-2018 17:00:00, 9.30e-02  
08-Jul-2018 18:00:00, 9.30e-02  
08-Jul-2018 19:00:00, 9.30e-02  
08-Jul-2018 20:00:00, 9.30e-02  
08-Jul-2018 21:00:00, 9.20e-02  
08-Jul-2018 22:00:00, 9.20e-02  
08-Jul-2018 23:00:00, 9.20e-02  
09-Jul-2018, 9.20e-02  
09-Jul-2018 01:00:00, 9.10e-02  
09-Jul-2018 02:00:00, 9.10e-02  
09-Jul-2018 03:00:00, 9.20e-02  
09-Jul-2018 04:00:00, 9.20e-02  
09-Jul-2018 05:00:00, 9.20e-02  
09-Jul-2018 06:00:00, 9.30e-02  
09-Jul-2018 07:00:00, 9.30e-02  
09-Jul-2018 08:00:00, 9.20e-02  
09-Jul-2018 09:00:00, 9.10e-02  
09-Jul-2018 10:00:00, 9.10e-02  
09-Jul-2018 11:00:00, 9.10e-02  
09-Jul-2018 12:00:00, 9.10e-02  
09-Jul-2018 13:00:00, 9.00e-02  
09-Jul-2018 14:00:00, 9.00e-02  
09-Jul-2018 15:00:00, 9.00e-02  
09-Jul-2018 16:00:00, 8.90e-02  
09-Jul-2018 17:00:00, 8.90e-02  
09-Jul-2018 18:00:00, 8.90e-02  
09-Jul-2018 19:00:00, 8.90e-02  
09-Jul-2018 20:00:00, 8.90e-02  
09-Jul-2018 21:00:00, 8.80e-02  
09-Jul-2018 22:00:00, 8.90e-02  
09-Jul-2018 23:00:00, 8.90e-02  
10-Jul-2018, 8.90e-02  
10-Jul-2018 01:00:00, 8.90e-02  
10-Jul-2018 02:00:00, 8.90e-02  
10-Jul-2018 03:00:00, 8.90e-02  
10-Jul-2018 04:00:00, 9.00e-02  
10-Jul-2018 05:00:00, 9.00e-02  
10-Jul-2018 06:00:00, 9.00e-02  
10-Jul-2018 07:00:00, 9.00e-02  
10-Jul-2018 08:00:00, 9.00e-02  
10-Jul-2018 09:00:00, 9.00e-02  
10-Jul-2018 10:00:00, 9.00e-02  
10-Jul-2018 11:00:00, 9.00e-02  
10-Jul-2018 12:00:00, 8.90e-02  
10-Jul-2018 13:00:00, 8.90e-02  
10-Jul-2018 14:00:00, 8.90e-02  
10-Jul-2018 15:00:00, 8.90e-02

10-Jul-2018 16:00:00, 9.20e-02  
10-Jul-2018 17:00:00, 9.20e-02  
10-Jul-2018 18:00:00, 8.90e-02  
10-Jul-2018 19:00:00, 8.90e-02  
10-Jul-2018 20:00:00, 9.10e-02  
10-Jul-2018 21:00:00, 9.30e-02  
10-Jul-2018 22:00:00, 9.20e-02  
10-Jul-2018 23:00:00, 9.00e-02  
11-Jul-2018, 9.00e-02  
11-Jul-2018 01:00:00, 9.00e-02  
11-Jul-2018 02:00:00, 9.00e-02  
11-Jul-2018 03:00:00, 9.00e-02  
11-Jul-2018 04:00:00, 9.00e-02  
11-Jul-2018 05:00:00, 9.10e-02  
11-Jul-2018 06:00:00, 9.10e-02  
11-Jul-2018 07:00:00, 9.10e-02  
11-Jul-2018 08:00:00, 9.10e-02  
11-Jul-2018 09:00:00, 9.10e-02  
11-Jul-2018 10:00:00, 9.00e-02  
11-Jul-2018 11:00:00, 9.00e-02  
11-Jul-2018 12:00:00, 9.00e-02  
11-Jul-2018 13:00:00, 8.90e-02  
11-Jul-2018 14:00:00, 8.90e-02  
11-Jul-2018 15:00:00, 9.00e-02  
11-Jul-2018 16:00:00, 9.20e-02  
11-Jul-2018 17:00:00, 9.00e-02  
11-Jul-2018 18:00:00, 8.90e-02  
11-Jul-2018 19:00:00, 8.90e-02  
11-Jul-2018 20:00:00, 8.80e-02  
11-Jul-2018 21:00:00, 8.80e-02  
11-Jul-2018 22:00:00, 8.80e-02  
11-Jul-2018 23:00:00, 8.90e-02  
12-Jul-2018, 8.90e-02  
12-Jul-2018 01:00:00, 8.90e-02  
12-Jul-2018 02:00:00, 8.90e-02  
12-Jul-2018 03:00:00, 8.90e-02  
12-Jul-2018 04:00:00, 8.90e-02  
12-Jul-2018 05:00:00, 8.90e-02  
12-Jul-2018 06:00:00, 8.90e-02  
12-Jul-2018 07:00:00, 8.90e-02  
12-Jul-2018 08:00:00, 8.90e-02  
12-Jul-2018 09:00:00, 9.00e-02  
12-Jul-2018 10:00:00, 9.00e-02  
12-Jul-2018 11:00:00, 9.00e-02  
12-Jul-2018 12:00:00, 8.90e-02  
12-Jul-2018 13:00:00, 8.90e-02  
12-Jul-2018 14:00:00, 8.90e-02  
12-Jul-2018 15:00:00, 8.90e-02  
12-Jul-2018 16:00:00, 8.90e-02  
12-Jul-2018 17:00:00, 9.20e-02  
12-Jul-2018 18:00:00, 9.00e-02  
12-Jul-2018 19:00:00, 8.90e-02  
12-Jul-2018 20:00:00, 8.90e-02  
12-Jul-2018 21:00:00, 8.90e-02  
12-Jul-2018 22:00:00, 9.10e-02  
12-Jul-2018 23:00:00, 9.20e-02  
13-Jul-2018, 9.20e-02  
13-Jul-2018 01:00:00, 9.10e-02  
13-Jul-2018 02:00:00, 9.10e-02  
13-Jul-2018 03:00:00, 9.10e-02  
13-Jul-2018 04:00:00, 9.10e-02  
13-Jul-2018 05:00:00, 9.10e-02  
13-Jul-2018 06:00:00, 9.10e-02  
13-Jul-2018 07:00:00, 9.10e-02

13-Jul-2018 08:00:00, 9.10e-02  
13-Jul-2018 09:00:00, 9.10e-02  
13-Jul-2018 10:00:00, 9.00e-02  
13-Jul-2018 11:00:00, 8.90e-02  
13-Jul-2018 12:00:00, 8.90e-02  
13-Jul-2018 13:00:00, 8.90e-02  
13-Jul-2018 14:00:00, 8.90e-02  
13-Jul-2018 15:00:00, 8.80e-02  
13-Jul-2018 16:00:00, 8.80e-02  
13-Jul-2018 17:00:00, 8.80e-02  
13-Jul-2018 18:00:00, 8.80e-02  
13-Jul-2018 19:00:00, 8.80e-02  
13-Jul-2018 20:00:00, 8.80e-02  
13-Jul-2018 21:00:00, 8.80e-02  
13-Jul-2018 22:00:00, 8.80e-02  
13-Jul-2018 23:00:00, 8.80e-02  
14-Jul-2018, 8.80e-02  
14-Jul-2018 01:00:00, 8.80e-02  
14-Jul-2018 02:00:00, 8.90e-02  
14-Jul-2018 03:00:00, 8.90e-02  
14-Jul-2018 04:00:00, 8.90e-02  
14-Jul-2018 05:00:00, 8.90e-02  
14-Jul-2018 06:00:00, 8.90e-02  
14-Jul-2018 07:00:00, 8.90e-02  
14-Jul-2018 08:00:00, 8.90e-02  
14-Jul-2018 09:00:00, 8.90e-02  
14-Jul-2018 10:00:00, 8.90e-02  
14-Jul-2018 11:00:00, 8.90e-02  
14-Jul-2018 12:00:00, 8.90e-02  
14-Jul-2018 13:00:00, 8.80e-02  
14-Jul-2018 14:00:00, 8.80e-02  
14-Jul-2018 15:00:00, 8.80e-02  
14-Jul-2018 16:00:00, 8.80e-02  
14-Jul-2018 17:00:00, 8.80e-02  
14-Jul-2018 18:00:00, 8.80e-02  
14-Jul-2018 19:00:00, 8.80e-02  
14-Jul-2018 20:00:00, 8.80e-02  
14-Jul-2018 21:00:00, 8.80e-02  
14-Jul-2018 22:00:00, 8.80e-02  
14-Jul-2018 23:00:00, 8.80e-02  
15-Jul-2018, 8.80e-02  
15-Jul-2018 01:00:00, 8.80e-02  
15-Jul-2018 02:00:00, 8.80e-02  
15-Jul-2018 03:00:00, 8.80e-02  
15-Jul-2018 04:00:00, 8.80e-02  
15-Jul-2018 05:00:00, 8.80e-02  
15-Jul-2018 06:00:00, 8.80e-02  
15-Jul-2018 07:00:00, 8.90e-02  
15-Jul-2018 08:00:00, 8.90e-02  
15-Jul-2018 09:00:00, 8.90e-02  
15-Jul-2018 10:00:00, 8.90e-02  
15-Jul-2018 11:00:00, 8.90e-02  
15-Jul-2018 12:00:00, 8.90e-02  
15-Jul-2018 13:00:00, 8.90e-02  
15-Jul-2018 14:00:00, 8.90e-02  
15-Jul-2018 15:00:00, 8.90e-02  
15-Jul-2018 16:00:00, 8.80e-02  
15-Jul-2018 17:00:00, 8.80e-02  
15-Jul-2018 18:00:00, 8.80e-02  
15-Jul-2018 19:00:00, 8.90e-02  
15-Jul-2018 20:00:00, 8.80e-02  
15-Jul-2018 21:00:00, 8.80e-02  
15-Jul-2018 22:00:00, 8.80e-02  
15-Jul-2018 23:00:00, 8.80e-02

16-Jul-2018, 8.80e-02  
16-Jul-2018 01:00:00, 8.80e-02  
16-Jul-2018 02:00:00, 8.90e-02  
16-Jul-2018 03:00:00, 8.90e-02  
16-Jul-2018 04:00:00, 8.90e-02  
16-Jul-2018 05:00:00, 8.90e-02  
16-Jul-2018 06:00:00, 8.90e-02  
16-Jul-2018 07:00:00, 9.00e-02  
16-Jul-2018 08:00:00, 8.90e-02  
16-Jul-2018 09:00:00, 8.90e-02  
16-Jul-2018 10:00:00, 8.90e-02  
16-Jul-2018 11:00:00, 8.90e-02  
16-Jul-2018 12:00:00, 8.90e-02  
16-Jul-2018 13:00:00, 8.90e-02  
16-Jul-2018 14:00:00, 8.90e-02  
16-Jul-2018 15:00:00, 8.80e-02  
16-Jul-2018 16:00:00, 8.80e-02  
16-Jul-2018 17:00:00, 8.80e-02  
16-Jul-2018 18:00:00, 8.80e-02  
16-Jul-2018 19:00:00, 8.90e-02  
16-Jul-2018 20:00:00, 8.90e-02  
16-Jul-2018 21:00:00, 8.90e-02  
16-Jul-2018 22:00:00, 8.90e-02  
16-Jul-2018 23:00:00, 8.90e-02  
17-Jul-2018, 8.90e-02  
17-Jul-2018 01:00:00, 8.90e-02  
17-Jul-2018 02:00:00, 8.90e-02  
17-Jul-2018 03:00:00, 8.90e-02  
17-Jul-2018 04:00:00, 8.90e-02  
17-Jul-2018 05:00:00, 8.90e-02  
17-Jul-2018 06:00:00, 8.90e-02  
17-Jul-2018 07:00:00, 8.90e-02  
17-Jul-2018 08:00:00, 8.90e-02  
17-Jul-2018 09:00:00, 8.90e-02  
17-Jul-2018 10:00:00, 8.90e-02  
17-Jul-2018 11:00:00, 8.90e-02  
17-Jul-2018 12:00:00, 8.90e-02  
17-Jul-2018 13:00:00, 8.80e-02  
17-Jul-2018 14:00:00, 8.80e-02  
17-Jul-2018 15:00:00, 8.80e-02  
17-Jul-2018 16:00:00, 8.80e-02  
17-Jul-2018 17:00:00, 8.80e-02  
17-Jul-2018 18:00:00, 8.80e-02  
17-Jul-2018 19:00:00, 9.00e-02  
17-Jul-2018 20:00:00, 8.80e-02  
17-Jul-2018 21:00:00, 8.80e-02  
17-Jul-2018 22:00:00, 8.80e-02  
17-Jul-2018 23:00:00, 8.80e-02  
18-Jul-2018, 8.80e-02  
18-Jul-2018 01:00:00, 8.80e-02  
18-Jul-2018 02:00:00, 8.80e-02  
18-Jul-2018 03:00:00, 8.80e-02  
18-Jul-2018 04:00:00, 8.80e-02  
18-Jul-2018 05:00:00, 8.90e-02  
18-Jul-2018 06:00:00, 8.90e-02  
18-Jul-2018 07:00:00, 8.90e-02  
18-Jul-2018 08:00:00, 8.90e-02  
18-Jul-2018 09:00:00, 8.90e-02  
18-Jul-2018 10:00:00, 8.80e-02  
18-Jul-2018 11:00:00, 8.80e-02  
18-Jul-2018 12:00:00, 8.80e-02  
18-Jul-2018 13:00:00, 8.80e-02  
18-Jul-2018 14:00:00, 8.80e-02  
18-Jul-2018 15:00:00, 8.80e-02

18-Jul-2018 16:00:00, 8.80e-02  
18-Jul-2018 17:00:00, 8.80e-02  
18-Jul-2018 18:00:00, 8.80e-02  
18-Jul-2018 19:00:00, 8.80e-02  
18-Jul-2018 20:00:00, 8.70e-02  
18-Jul-2018 21:00:00, 8.70e-02  
18-Jul-2018 22:00:00, 8.70e-02  
18-Jul-2018 23:00:00, 8.80e-02  
19-Jul-2018, 8.80e-02  
19-Jul-2018 01:00:00, 8.80e-02  
19-Jul-2018 02:00:00, 8.80e-02  
19-Jul-2018 03:00:00, 8.80e-02  
19-Jul-2018 04:00:00, 8.80e-02  
19-Jul-2018 05:00:00, 8.80e-02  
19-Jul-2018 06:00:00, 8.80e-02  
19-Jul-2018 07:00:00, 8.80e-02  
19-Jul-2018 08:00:00, 8.80e-02  
19-Jul-2018 09:00:00, 8.80e-02  
19-Jul-2018 10:00:00, 8.80e-02  
19-Jul-2018 11:00:00, 8.80e-02  
19-Jul-2018 12:00:00, 8.80e-02  
19-Jul-2018 13:00:00, 8.80e-02  
19-Jul-2018 14:00:00, 8.80e-02  
19-Jul-2018 15:00:00, 8.80e-02  
19-Jul-2018 16:00:00, 8.80e-02  
19-Jul-2018 17:00:00, 8.70e-02  
19-Jul-2018 18:00:00, 8.70e-02  
19-Jul-2018 19:00:00, 8.70e-02  
19-Jul-2018 20:00:00, 8.70e-02  
19-Jul-2018 21:00:00, 8.70e-02  
19-Jul-2018 22:00:00, 8.70e-02  
19-Jul-2018 23:00:00, 8.70e-02  
20-Jul-2018, 8.70e-02  
20-Jul-2018 01:00:00, 8.70e-02  
20-Jul-2018 02:00:00, 8.80e-02  
20-Jul-2018 03:00:00, 8.80e-02  
20-Jul-2018 04:00:00, 8.80e-02  
20-Jul-2018 05:00:00, 8.80e-02  
20-Jul-2018 06:00:00, 8.80e-02  
20-Jul-2018 07:00:00, 8.80e-02  
20-Jul-2018 08:00:00, 8.80e-02  
20-Jul-2018 09:00:00, 8.80e-02  
20-Jul-2018 10:00:00, 8.80e-02  
20-Jul-2018 11:00:00, 8.80e-02  
20-Jul-2018 12:00:00, 8.80e-02  
20-Jul-2018 13:00:00, 8.80e-02  
20-Jul-2018 14:00:00, 8.70e-02  
20-Jul-2018 15:00:00, 8.70e-02  
20-Jul-2018 16:00:00, 8.70e-02  
20-Jul-2018 17:00:00, 8.70e-02  
20-Jul-2018 18:00:00, 8.70e-02  
20-Jul-2018 19:00:00, 8.70e-02  
20-Jul-2018 20:00:00, 8.70e-02  
20-Jul-2018 21:00:00, 8.70e-02  
20-Jul-2018 22:00:00, 8.70e-02  
20-Jul-2018 23:00:00, 8.70e-02  
21-Jul-2018, 8.70e-02  
21-Jul-2018 01:00:00, 8.80e-02  
21-Jul-2018 02:00:00, 8.80e-02  
21-Jul-2018 03:00:00, 8.80e-02  
21-Jul-2018 04:00:00, 8.80e-02  
21-Jul-2018 05:00:00, 8.80e-02  
21-Jul-2018 06:00:00, 8.80e-02  
21-Jul-2018 07:00:00, 8.80e-02

21-Jul-2018 08:00:00, 8.80e-02  
21-Jul-2018 09:00:00, 8.80e-02  
21-Jul-2018 10:00:00, 8.80e-02  
21-Jul-2018 11:00:00, 8.80e-02  
21-Jul-2018 12:00:00, 8.80e-02  
21-Jul-2018 13:00:00, 8.70e-02  
21-Jul-2018 14:00:00, 8.70e-02  
21-Jul-2018 15:00:00, 8.70e-02  
21-Jul-2018 16:00:00, 8.70e-02  
21-Jul-2018 17:00:00, 8.70e-02  
21-Jul-2018 18:00:00, 8.70e-02  
21-Jul-2018 19:00:00, 8.60e-02  
21-Jul-2018 20:00:00, 8.60e-02  
21-Jul-2018 21:00:00, 8.60e-02  
21-Jul-2018 22:00:00, 8.60e-02  
21-Jul-2018 23:00:00, 8.70e-02  
22-Jul-2018, 8.70e-02  
22-Jul-2018 01:00:00, 8.70e-02  
22-Jul-2018 02:00:00, 8.70e-02  
22-Jul-2018 03:00:00, 8.70e-02  
22-Jul-2018 04:00:00, 8.70e-02  
22-Jul-2018 05:00:00, 8.70e-02  
22-Jul-2018 06:00:00, 8.70e-02  
22-Jul-2018 07:00:00, 8.80e-02  
22-Jul-2018 08:00:00, 8.80e-02  
22-Jul-2018 09:00:00, 8.80e-02  
22-Jul-2018 10:00:00, 8.70e-02  
22-Jul-2018 11:00:00, 8.70e-02  
22-Jul-2018 12:00:00, 8.70e-02  
22-Jul-2018 13:00:00, 8.70e-02  
22-Jul-2018 14:00:00, 8.70e-02  
22-Jul-2018 15:00:00, 8.60e-02  
22-Jul-2018 16:00:00, 8.60e-02  
22-Jul-2018 17:00:00, 8.60e-02  
22-Jul-2018 18:00:00, 8.60e-02  
22-Jul-2018 19:00:00, 8.70e-02  
22-Jul-2018 20:00:00, 8.80e-02  
22-Jul-2018 21:00:00, 8.60e-02  
22-Jul-2018 22:00:00, 8.60e-02  
22-Jul-2018 23:00:00, 8.80e-02  
23-Jul-2018, 8.90e-02  
23-Jul-2018 01:00:00, 8.90e-02  
23-Jul-2018 02:00:00, 8.90e-02  
23-Jul-2018 03:00:00, 8.90e-02  
23-Jul-2018 04:00:00, 8.80e-02  
23-Jul-2018 05:00:00, 8.90e-02  
23-Jul-2018 06:00:00, 8.90e-02  
23-Jul-2018 07:00:00, 8.90e-02  
23-Jul-2018 08:00:00, 8.80e-02  
23-Jul-2018 09:00:00, 8.80e-02  
23-Jul-2018 10:00:00, 8.80e-02  
23-Jul-2018 11:00:00, 8.70e-02  
23-Jul-2018 12:00:00, 8.70e-02  
23-Jul-2018 13:00:00, 8.70e-02  
23-Jul-2018 14:00:00, 8.70e-02  
23-Jul-2018 15:00:00, 8.60e-02  
23-Jul-2018 16:00:00, 8.60e-02  
23-Jul-2018 17:00:00, 8.60e-02  
23-Jul-2018 18:00:00, 8.60e-02  
23-Jul-2018 19:00:00, 8.60e-02  
23-Jul-2018 20:00:00, 8.70e-02  
23-Jul-2018 21:00:00, 8.70e-02  
23-Jul-2018 22:00:00, 8.60e-02  
23-Jul-2018 23:00:00, 8.60e-02



24-Jul-2018, 8.60e-02  
24-Jul-2018 01:00:00, 8.70e-02  
24-Jul-2018 02:00:00, 8.70e-02  
24-Jul-2018 03:00:00, 8.70e-02  
24-Jul-2018 04:00:00, 8.70e-02  
24-Jul-2018 05:00:00, 8.70e-02  
24-Jul-2018 06:00:00, 8.70e-02  
24-Jul-2018 07:00:00, 8.80e-02  
24-Jul-2018 08:00:00, 8.80e-02  
24-Jul-2018 09:00:00, 8.70e-02  
24-Jul-2018 10:00:00, 8.70e-02  
24-Jul-2018 11:00:00, 8.70e-02  
24-Jul-2018 12:00:00, 8.70e-02  
24-Jul-2018 13:00:00, 8.70e-02  
24-Jul-2018 14:00:00, 8.60e-02  
24-Jul-2018 15:00:00, 8.60e-02  
24-Jul-2018 16:00:00, 8.60e-02  
24-Jul-2018 17:00:00, 8.60e-02  
24-Jul-2018 18:00:00, 8.60e-02  
24-Jul-2018 19:00:00, 8.60e-02  
24-Jul-2018 20:00:00, 8.60e-02  
24-Jul-2018 21:00:00, 8.60e-02  
24-Jul-2018 22:00:00, 8.60e-02  
24-Jul-2018 23:00:00, 8.60e-02  
25-Jul-2018, 8.60e-02  
25-Jul-2018 01:00:00, 8.60e-02  
25-Jul-2018 02:00:00, 8.60e-02  
25-Jul-2018 03:00:00, 8.60e-02  
25-Jul-2018 04:00:00, 8.60e-02  
25-Jul-2018 05:00:00, 8.70e-02  
25-Jul-2018 06:00:00, 8.70e-02  
25-Jul-2018 07:00:00, 8.70e-02  
25-Jul-2018 08:00:00, 8.70e-02  
25-Jul-2018 09:00:00, 8.70e-02  
25-Jul-2018 10:00:00, 8.70e-02  
25-Jul-2018 11:00:00, 8.70e-02  
25-Jul-2018 12:00:00, 8.60e-02  
25-Jul-2018 13:00:00, 8.70e-02  
25-Jul-2018 14:00:00, 8.70e-02  
25-Jul-2018 15:00:00, 8.60e-02  
25-Jul-2018 16:00:00, 8.60e-02  
25-Jul-2018 17:00:00, 8.60e-02  
25-Jul-2018 18:00:00, 8.60e-02  
25-Jul-2018 19:00:00, 8.60e-02  
25-Jul-2018 20:00:00, 8.60e-02  
25-Jul-2018 21:00:00, 8.60e-02  
25-Jul-2018 22:00:00, 8.60e-02  
25-Jul-2018 23:00:00, 8.60e-02  
26-Jul-2018, 8.60e-02  
26-Jul-2018 01:00:00, 8.60e-02  
26-Jul-2018 02:00:00, 8.60e-02  
26-Jul-2018 03:00:00, 8.60e-02  
26-Jul-2018 04:00:00, 8.60e-02  
26-Jul-2018 05:00:00, 8.60e-02  
26-Jul-2018 06:00:00, 8.60e-02  
26-Jul-2018 07:00:00, 8.60e-02  
26-Jul-2018 08:00:00, 8.60e-02  
26-Jul-2018 09:00:00, 8.60e-02  
26-Jul-2018 10:00:00, 8.60e-02  
26-Jul-2018 11:00:00, 8.60e-02  
26-Jul-2018 12:00:00, 8.60e-02  
26-Jul-2018 13:00:00, 8.60e-02  
26-Jul-2018 14:00:00, 8.60e-02  
26-Jul-2018 15:00:00, 8.60e-02

26-Jul-2018 16:00:00, 8.60e-02  
26-Jul-2018 17:00:00, 8.60e-02  
26-Jul-2018 18:00:00, 8.60e-02  
26-Jul-2018 19:00:00, 8.50e-02  
26-Jul-2018 20:00:00, 8.50e-02  
26-Jul-2018 21:00:00, 8.60e-02  
26-Jul-2018 22:00:00, 8.60e-02  
26-Jul-2018 23:00:00, 8.60e-02  
27-Jul-2018, 8.60e-02  
27-Jul-2018 01:00:00, 8.60e-02  
27-Jul-2018 02:00:00, 8.60e-02  
27-Jul-2018 03:00:00, 8.60e-02  
27-Jul-2018 04:00:00, 8.60e-02  
27-Jul-2018 05:00:00, 8.60e-02  
27-Jul-2018 06:00:00, 8.60e-02  
27-Jul-2018 07:00:00, 8.60e-02  
27-Jul-2018 08:00:00, 8.60e-02  
27-Jul-2018 09:00:00, 8.60e-02  
27-Jul-2018 10:00:00, 8.60e-02  
27-Jul-2018 11:00:00, 8.60e-02  
27-Jul-2018 12:00:00, 8.60e-02  
27-Jul-2018 13:00:00, 8.50e-02  
27-Jul-2018 14:00:00, 8.50e-02  
27-Jul-2018 15:00:00, 8.50e-02  
27-Jul-2018 16:00:00, 8.50e-02  
27-Jul-2018 17:00:00, 8.60e-02  
27-Jul-2018 18:00:00, 8.60e-02  
27-Jul-2018 19:00:00, 8.50e-02  
27-Jul-2018 20:00:00, 8.50e-02  
27-Jul-2018 21:00:00, 8.50e-02  
27-Jul-2018 22:00:00, 8.50e-02  
27-Jul-2018 23:00:00, 8.50e-02  
28-Jul-2018, 8.50e-02  
28-Jul-2018 01:00:00, 8.50e-02  
28-Jul-2018 02:00:00, 8.50e-02  
28-Jul-2018 03:00:00, 8.60e-02  
28-Jul-2018 04:00:00, 8.60e-02  
28-Jul-2018 05:00:00, 8.60e-02  
28-Jul-2018 06:00:00, 8.60e-02  
28-Jul-2018 07:00:00, 8.60e-02  
28-Jul-2018 08:00:00, 8.60e-02  
28-Jul-2018 09:00:00, 8.60e-02  
28-Jul-2018 10:00:00, 8.60e-02  
28-Jul-2018 11:00:00, 8.60e-02  
28-Jul-2018 12:00:00, 8.50e-02  
28-Jul-2018 13:00:00, 8.50e-02  
28-Jul-2018 14:00:00, 8.50e-02  
28-Jul-2018 15:00:00, 8.50e-02  
28-Jul-2018 16:00:00, 8.50e-02  
28-Jul-2018 17:00:00, 8.50e-02  
28-Jul-2018 18:00:00, 8.50e-02  
28-Jul-2018 19:00:00, 8.70e-02  
28-Jul-2018 20:00:00, 8.60e-02  
28-Jul-2018 21:00:00, 8.50e-02  
28-Jul-2018 22:00:00, 8.50e-02  
28-Jul-2018 23:00:00, 8.50e-02  
29-Jul-2018, 8.50e-02  
29-Jul-2018 01:00:00, 8.50e-02  
29-Jul-2018 02:00:00, 8.50e-02  
29-Jul-2018 03:00:00, 8.50e-02  
29-Jul-2018 04:00:00, 8.50e-02  
29-Jul-2018 05:00:00, 8.50e-02  
29-Jul-2018 06:00:00, 8.50e-02  
29-Jul-2018 07:00:00, 8.60e-02

29-Jul-2018 08:00:00, 8.60e-02  
29-Jul-2018 09:00:00, 8.50e-02  
29-Jul-2018 10:00:00, 8.50e-02  
29-Jul-2018 11:00:00, 8.50e-02  
29-Jul-2018 12:00:00, 8.50e-02  
29-Jul-2018 13:00:00, 8.50e-02  
29-Jul-2018 14:00:00, 8.50e-02  
29-Jul-2018 15:00:00, 8.50e-02  
29-Jul-2018 16:00:00, 8.50e-02  
29-Jul-2018 17:00:00, 8.60e-02  
29-Jul-2018 18:00:00, 8.50e-02  
29-Jul-2018 19:00:00, 8.50e-02  
29-Jul-2018 20:00:00, 8.50e-02  
29-Jul-2018 21:00:00, 8.50e-02  
29-Jul-2018 22:00:00, 8.50e-02  
29-Jul-2018 23:00:00, 8.50e-02  
30-Jul-2018, 8.50e-02  
30-Jul-2018 01:00:00, 8.50e-02  
30-Jul-2018 02:00:00, 8.50e-02  
30-Jul-2018 03:00:00, 8.50e-02  
30-Jul-2018 04:00:00, 8.50e-02  
30-Jul-2018 05:00:00, 8.50e-02  
30-Jul-2018 06:00:00, 8.50e-02  
30-Jul-2018 07:00:00, 8.50e-02  
30-Jul-2018 08:00:00, 8.50e-02  
30-Jul-2018 09:00:00, 8.50e-02  
30-Jul-2018 10:00:00, 8.50e-02  
30-Jul-2018 11:00:00, 8.50e-02  
30-Jul-2018 12:00:00, 8.50e-02  
30-Jul-2018 13:00:00, 8.40e-02  
30-Jul-2018 14:00:00, 8.40e-02  
30-Jul-2018 15:00:00, 8.40e-02  
30-Jul-2018 16:00:00, 8.30e-02  
30-Jul-2018 17:00:00, 8.30e-02  
30-Jul-2018 18:00:00, 8.30e-02  
30-Jul-2018 19:00:00, 8.30e-02  
30-Jul-2018 20:00:00, 8.30e-02  
30-Jul-2018 21:00:00, 8.30e-02  
30-Jul-2018 22:00:00, 8.30e-02  
30-Jul-2018 23:00:00, 8.30e-02  
31-Jul-2018, 8.40e-02  
31-Jul-2018 01:00:00, 8.40e-02  
31-Jul-2018 02:00:00, 8.40e-02  
31-Jul-2018 03:00:00, 8.40e-02  
31-Jul-2018 04:00:00, 8.40e-02  
31-Jul-2018 05:00:00, 8.40e-02  
31-Jul-2018 06:00:00, 8.40e-02  
31-Jul-2018 07:00:00, 8.50e-02  
31-Jul-2018 08:00:00, 8.40e-02  
31-Jul-2018 09:00:00, 8.40e-02  
31-Jul-2018 10:00:00, 8.40e-02  
31-Jul-2018 11:00:00, 8.30e-02  
31-Jul-2018 12:00:00, 8.30e-02  
31-Jul-2018 13:00:00, 8.30e-02  
31-Jul-2018 14:00:00, 8.30e-02  
31-Jul-2018 15:00:00, 8.30e-02  
31-Jul-2018 16:00:00, 8.30e-02  
31-Jul-2018 17:00:00, 8.30e-02  
31-Jul-2018 18:00:00, 8.30e-02  
31-Jul-2018 19:00:00, 8.30e-02  
31-Jul-2018 20:00:00, 8.30e-02  
31-Jul-2018 21:00:00, 8.30e-02  
31-Jul-2018 22:00:00, 8.30e-02  
31-Jul-2018 23:00:00, 8.30e-02

01-Aug-2018, 8.30e-02  
01-Aug-2018 01:00:00, 8.30e-02  
01-Aug-2018 02:00:00, 8.30e-02  
01-Aug-2018 03:00:00, 8.30e-02  
01-Aug-2018 04:00:00, 8.30e-02  
01-Aug-2018 05:00:00, 8.30e-02  
01-Aug-2018 06:00:00, 8.30e-02  
01-Aug-2018 07:00:00, 8.30e-02  
01-Aug-2018 08:00:00, 8.30e-02  
01-Aug-2018 09:00:00, 8.30e-02  
01-Aug-2018 10:00:00, 8.30e-02  
01-Aug-2018 11:00:00, 8.30e-02  
01-Aug-2018 12:00:00, 8.30e-02  
01-Aug-2018 13:00:00, 8.30e-02  
01-Aug-2018 14:00:00, 8.30e-02  
01-Aug-2018 15:00:00, 8.30e-02  
01-Aug-2018 16:00:00, 8.30e-02  
01-Aug-2018 17:00:00, 8.30e-02  
01-Aug-2018 18:00:00, 8.30e-02  
01-Aug-2018 19:00:00, 8.30e-02  
01-Aug-2018 20:00:00, 8.30e-02  
01-Aug-2018 21:00:00, 8.30e-02  
01-Aug-2018 22:00:00, 8.30e-02  
01-Aug-2018 23:00:00, 8.30e-02  
02-Aug-2018, 8.30e-02  
02-Aug-2018 01:00:00, 8.30e-02  
02-Aug-2018 02:00:00, 8.30e-02  
02-Aug-2018 03:00:00, 8.30e-02  
02-Aug-2018 04:00:00, 8.30e-02  
02-Aug-2018 05:00:00, 8.30e-02  
02-Aug-2018 06:00:00, 8.30e-02  
02-Aug-2018 07:00:00, 8.30e-02  
02-Aug-2018 08:00:00, 8.30e-02  
02-Aug-2018 09:00:00, 8.30e-02  
02-Aug-2018 10:00:00, 8.30e-02  
02-Aug-2018 11:00:00, 8.30e-02  
02-Aug-2018 12:00:00, 8.30e-02  
02-Aug-2018 13:00:00, 8.30e-02  
02-Aug-2018 14:00:00, 8.30e-02  
02-Aug-2018 15:00:00, 8.20e-02  
02-Aug-2018 16:00:00, 8.20e-02  
02-Aug-2018 17:00:00, 8.20e-02  
02-Aug-2018 18:00:00, 8.20e-02  
02-Aug-2018 19:00:00, 8.20e-02  
02-Aug-2018 20:00:00, 8.20e-02  
02-Aug-2018 21:00:00, 8.20e-02  
02-Aug-2018 22:00:00, 8.20e-02  
02-Aug-2018 23:00:00, 8.20e-02  
03-Aug-2018, 8.20e-02  
03-Aug-2018 01:00:00, 8.20e-02  
03-Aug-2018 02:00:00, 8.30e-02  
03-Aug-2018 03:00:00, 8.30e-02  
03-Aug-2018 04:00:00, 8.30e-02  
03-Aug-2018 05:00:00, 8.30e-02  
03-Aug-2018 06:00:00, 8.30e-02  
03-Aug-2018 07:00:00, 8.30e-02  
03-Aug-2018 08:00:00, 8.30e-02  
03-Aug-2018 09:00:00, 8.20e-02  
03-Aug-2018 10:00:00, 8.20e-02  
03-Aug-2018 11:00:00, 8.30e-02  
03-Aug-2018 12:00:00, 8.30e-02  
03-Aug-2018 13:00:00, 8.20e-02  
03-Aug-2018 14:00:00, 8.20e-02  
03-Aug-2018 15:00:00, 8.40e-02

03-Aug-2018 16:00:00, 8.20e-02  
03-Aug-2018 17:00:00, 8.20e-02  
03-Aug-2018 18:00:00, 8.20e-02  
03-Aug-2018 19:00:00, 8.20e-02  
03-Aug-2018 20:00:00, 8.20e-02  
03-Aug-2018 21:00:00, 8.20e-02  
03-Aug-2018 22:00:00, 8.20e-02  
03-Aug-2018 23:00:00, 8.30e-02  
04-Aug-2018, 8.30e-02  
04-Aug-2018 01:00:00, 8.30e-02  
04-Aug-2018 02:00:00, 8.30e-02  
04-Aug-2018 03:00:00, 8.30e-02  
04-Aug-2018 04:00:00, 8.30e-02  
04-Aug-2018 05:00:00, 8.30e-02  
04-Aug-2018 06:00:00, 8.30e-02  
04-Aug-2018 07:00:00, 8.30e-02  
04-Aug-2018 08:00:00, 8.30e-02  
04-Aug-2018 09:00:00, 8.30e-02  
04-Aug-2018 10:00:00, 8.30e-02  
04-Aug-2018 11:00:00, 8.20e-02  
04-Aug-2018 12:00:00, 8.20e-02  
04-Aug-2018 13:00:00, 8.20e-02  
04-Aug-2018 14:00:00, 8.10e-02  
04-Aug-2018 15:00:00, 8.10e-02  
04-Aug-2018 16:00:00, 8.10e-02  
04-Aug-2018 17:00:00, 8.10e-02  
04-Aug-2018 18:00:00, 8.10e-02  
04-Aug-2018 19:00:00, 8.10e-02  
04-Aug-2018 20:00:00, 8.20e-02  
04-Aug-2018 21:00:00, 8.10e-02  
04-Aug-2018 22:00:00, 8.10e-02  
04-Aug-2018 23:00:00, 8.10e-02  
05-Aug-2018, 8.20e-02  
05-Aug-2018 01:00:00, 8.20e-02  
05-Aug-2018 02:00:00, 8.20e-02  
05-Aug-2018 03:00:00, 8.20e-02  
05-Aug-2018 04:00:00, 8.20e-02  
05-Aug-2018 05:00:00, 8.10e-02  
05-Aug-2018 06:00:00, 8.10e-02  
05-Aug-2018 07:00:00, 8.40e-02  
05-Aug-2018 08:00:00, 8.50e-02  
05-Aug-2018 09:00:00, 8.40e-02  
05-Aug-2018 10:00:00, 8.20e-02  
05-Aug-2018 11:00:00, 8.10e-02  
05-Aug-2018 12:00:00, 8.10e-02  
05-Aug-2018 13:00:00, 8.10e-02  
05-Aug-2018 14:00:00, 8.10e-02  
05-Aug-2018 15:00:00, 8.10e-02  
05-Aug-2018 16:00:00, 8.10e-02  
05-Aug-2018 17:00:00, 8.10e-02  
05-Aug-2018 18:00:00, 8.10e-02  
05-Aug-2018 19:00:00, 8.10e-02  
05-Aug-2018 20:00:00, 8.10e-02  
05-Aug-2018 21:00:00, 8.10e-02  
05-Aug-2018 22:00:00, 8.10e-02  
05-Aug-2018 23:00:00, 8.10e-02  
06-Aug-2018, 8.10e-02  
06-Aug-2018 01:00:00, 8.10e-02  
06-Aug-2018 02:00:00, 8.10e-02  
06-Aug-2018 03:00:00, 8.10e-02  
06-Aug-2018 04:00:00, 8.10e-02  
06-Aug-2018 05:00:00, 8.10e-02  
06-Aug-2018 06:00:00, 8.10e-02  
06-Aug-2018 07:00:00, 8.10e-02

06-Aug-2018 08:00:00, 8.10e-02  
06-Aug-2018 09:00:00, 8.10e-02  
06-Aug-2018 10:00:00, 8.10e-02  
06-Aug-2018 11:00:00, 8.10e-02  
06-Aug-2018 12:00:00, 8.10e-02  
06-Aug-2018 13:00:00, 8.10e-02  
06-Aug-2018 14:00:00, 8.10e-02  
06-Aug-2018 15:00:00, 8.10e-02  
06-Aug-2018 16:00:00, 8.10e-02  
06-Aug-2018 17:00:00, 8.10e-02  
06-Aug-2018 18:00:00, 8.10e-02  
06-Aug-2018 19:00:00, 8.10e-02  
06-Aug-2018 20:00:00, 8.10e-02  
06-Aug-2018 21:00:00, 8.10e-02  
06-Aug-2018 22:00:00, 8.10e-02  
06-Aug-2018 23:00:00, 8.10e-02  
07-Aug-2018, 8.10e-02  
07-Aug-2018 01:00:00, 8.10e-02  
07-Aug-2018 02:00:00, 8.10e-02  
07-Aug-2018 03:00:00, 8.10e-02  
07-Aug-2018 04:00:00, 8.10e-02  
07-Aug-2018 05:00:00, 8.10e-02  
07-Aug-2018 06:00:00, 8.10e-02  
07-Aug-2018 07:00:00, 8.10e-02  
07-Aug-2018 08:00:00, 8.10e-02  
07-Aug-2018 09:00:00, 8.10e-02  
07-Aug-2018 10:00:00, 8.10e-02  
07-Aug-2018 11:00:00, 8.10e-02  
07-Aug-2018 12:00:00, 8.10e-02  
07-Aug-2018 13:00:00, 8.10e-02  
07-Aug-2018 14:00:00, 8.10e-02  
07-Aug-2018 15:00:00, 8.10e-02  
07-Aug-2018 16:00:00, 8.10e-02  
07-Aug-2018 17:00:00, 8.10e-02  
07-Aug-2018 18:00:00, 8.10e-02  
07-Aug-2018 19:00:00, 8.10e-02  
07-Aug-2018 20:00:00, 8.10e-02  
07-Aug-2018 21:00:00, 8.10e-02  
07-Aug-2018 22:00:00, 8.10e-02  
07-Aug-2018 23:00:00, 8.10e-02  
08-Aug-2018, 8.10e-02  
08-Aug-2018 01:00:00, 8.10e-02  
08-Aug-2018 02:00:00, 8.10e-02  
08-Aug-2018 03:00:00, 8.10e-02  
08-Aug-2018 04:00:00, 8.10e-02  
08-Aug-2018 05:00:00, 8.10e-02  
08-Aug-2018 06:00:00, 8.10e-02  
08-Aug-2018 07:00:00, 8.10e-02  
08-Aug-2018 08:00:00, 8.10e-02  
08-Aug-2018 09:00:00, 8.10e-02  
08-Aug-2018 10:00:00, 8.10e-02  
08-Aug-2018 11:00:00, 8.10e-02  
08-Aug-2018 12:00:00, 8.10e-02  
08-Aug-2018 13:00:00, 8.10e-02  
08-Aug-2018 14:00:00, 8.10e-02  
08-Aug-2018 15:00:00, 8.10e-02  
08-Aug-2018 16:00:00, 8.10e-02  
08-Aug-2018 17:00:00, 8.10e-02  
08-Aug-2018 18:00:00, 8.10e-02  
08-Aug-2018 19:00:00, 8.10e-02  
08-Aug-2018 20:00:00, 8.10e-02  
08-Aug-2018 21:00:00, 8.10e-02  
08-Aug-2018 22:00:00, 8.10e-02  
08-Aug-2018 23:00:00, 8.10e-02

09-Aug-2018, 8.10e-02  
09-Aug-2018 01:00:00, 8.10e-02  
09-Aug-2018 02:00:00, 8.10e-02  
09-Aug-2018 03:00:00, 8.10e-02  
09-Aug-2018 04:00:00, 8.10e-02  
09-Aug-2018 05:00:00, 8.10e-02  
09-Aug-2018 06:00:00, 8.10e-02  
09-Aug-2018 07:00:00, 8.10e-02  
09-Aug-2018 08:00:00, 8.10e-02  
09-Aug-2018 09:00:00, 8.10e-02  
09-Aug-2018 10:00:00, 8.10e-02  
09-Aug-2018 11:00:00, 8.10e-02  
09-Aug-2018 12:00:00, 8.10e-02  
09-Aug-2018 13:00:00, 8.10e-02  
09-Aug-2018 14:00:00, 8.10e-02  
09-Aug-2018 15:00:00, 8.10e-02  
09-Aug-2018 16:00:00, 8.10e-02  
09-Aug-2018 17:00:00, 8.10e-02  
09-Aug-2018 18:00:00, 8.10e-02  
09-Aug-2018 19:00:00, 8.10e-02  
09-Aug-2018 20:00:00, 8.10e-02  
09-Aug-2018 21:00:00, 8.10e-02  
09-Aug-2018 22:00:00, 8.10e-02  
09-Aug-2018 23:00:00, 8.10e-02  
10-Aug-2018, 8.10e-02  
10-Aug-2018 01:00:00, 8.10e-02  
10-Aug-2018 02:00:00, 8.10e-02  
10-Aug-2018 03:00:00, 8.10e-02  
10-Aug-2018 04:00:00, 8.10e-02  
10-Aug-2018 05:00:00, 8.10e-02  
10-Aug-2018 06:00:00, 8.10e-02  
10-Aug-2018 07:00:00, 8.10e-02  
10-Aug-2018 08:00:00, 8.10e-02  
10-Aug-2018 09:00:00, 8.10e-02  
10-Aug-2018 10:00:00, 8.10e-02  
10-Aug-2018 11:00:00, 8.10e-02  
10-Aug-2018 12:00:00, 8.10e-02  
10-Aug-2018 13:00:00, 8.10e-02  
10-Aug-2018 14:00:00, 8.10e-02  
10-Aug-2018 15:00:00, 8.10e-02  
10-Aug-2018 16:00:00, 8.10e-02  
10-Aug-2018 17:00:00, 8.10e-02  
10-Aug-2018 18:00:00, 8.10e-02  
10-Aug-2018 19:00:00, 8.10e-02  
10-Aug-2018 20:00:00, 8.10e-02  
10-Aug-2018 21:00:00, 8.10e-02  
10-Aug-2018 22:00:00, 8.10e-02  
10-Aug-2018 23:00:00, 8.10e-02  
11-Aug-2018, 8.10e-02  
11-Aug-2018 01:00:00, 8.10e-02  
11-Aug-2018 02:00:00, 8.10e-02  
11-Aug-2018 03:00:00, 8.10e-02  
11-Aug-2018 04:00:00, 8.10e-02  
11-Aug-2018 05:00:00, 8.10e-02  
11-Aug-2018 06:00:00, 8.10e-02  
11-Aug-2018 07:00:00, 8.10e-02  
11-Aug-2018 08:00:00, 8.10e-02  
11-Aug-2018 09:00:00, 8.10e-02  
11-Aug-2018 10:00:00, 8.10e-02  
11-Aug-2018 11:00:00, 8.10e-02  
11-Aug-2018 12:00:00, 8.10e-02  
11-Aug-2018 13:00:00, 8.10e-02  
11-Aug-2018 14:00:00, 8.10e-02  
11-Aug-2018 15:00:00, 8.10e-02

11-Aug-2018 16:00:00, 8.10e-02  
11-Aug-2018 17:00:00, 8.10e-02  
11-Aug-2018 18:00:00, 8.10e-02  
11-Aug-2018 19:00:00, 8.10e-02  
11-Aug-2018 20:00:00, 8.10e-02  
11-Aug-2018 21:00:00, 8.10e-02  
11-Aug-2018 22:00:00, 8.10e-02  
11-Aug-2018 23:00:00, 8.10e-02  
12-Aug-2018, 8.10e-02  
12-Aug-2018 01:00:00, 8.10e-02  
12-Aug-2018 02:00:00, 8.10e-02  
12-Aug-2018 03:00:00, 8.10e-02  
12-Aug-2018 04:00:00, 8.10e-02  
12-Aug-2018 05:00:00, 8.10e-02  
12-Aug-2018 06:00:00, 8.10e-02  
12-Aug-2018 07:00:00, 8.10e-02  
12-Aug-2018 08:00:00, 8.10e-02  
12-Aug-2018 09:00:00, 8.10e-02  
12-Aug-2018 10:00:00, 8.10e-02  
12-Aug-2018 11:00:00, 8.10e-02  
12-Aug-2018 12:00:00, 8.10e-02  
12-Aug-2018 13:00:00, 8.10e-02  
12-Aug-2018 14:00:00, 8.00e-02  
12-Aug-2018 15:00:00, 8.00e-02  
12-Aug-2018 16:00:00, 8.00e-02  
12-Aug-2018 17:00:00, 8.00e-02  
12-Aug-2018 18:00:00, 8.00e-02  
12-Aug-2018 19:00:00, 8.00e-02  
12-Aug-2018 20:00:00, 8.00e-02  
12-Aug-2018 21:00:00, 8.10e-02  
12-Aug-2018 22:00:00, 8.10e-02  
12-Aug-2018 23:00:00, 8.10e-02  
13-Aug-2018, 8.10e-02  
13-Aug-2018 01:00:00, 8.10e-02  
13-Aug-2018 02:00:00, 8.10e-02  
13-Aug-2018 03:00:00, 8.10e-02  
13-Aug-2018 04:00:00, 8.10e-02  
13-Aug-2018 05:00:00, 8.10e-02  
13-Aug-2018 06:00:00, 8.10e-02  
13-Aug-2018 07:00:00, 8.10e-02  
13-Aug-2018 08:00:00, 8.10e-02  
13-Aug-2018 09:00:00, 8.10e-02  
13-Aug-2018 10:00:00, 8.10e-02  
13-Aug-2018 11:00:00, 8.10e-02  
13-Aug-2018 12:00:00, 8.10e-02  
13-Aug-2018 13:00:00, 8.00e-02  
13-Aug-2018 14:00:00, 8.00e-02  
13-Aug-2018 15:00:00, 8.00e-02  
13-Aug-2018 16:00:00, 8.00e-02  
13-Aug-2018 17:00:00, 8.00e-02  
13-Aug-2018 18:00:00, 8.00e-02  
13-Aug-2018 19:00:00, 8.00e-02  
13-Aug-2018 20:00:00, 8.00e-02  
13-Aug-2018 21:00:00, 8.00e-02  
13-Aug-2018 22:00:00, 8.10e-02  
13-Aug-2018 23:00:00, 8.10e-02  
14-Aug-2018, 8.10e-02  
14-Aug-2018 01:00:00, 8.10e-02  
14-Aug-2018 02:00:00, 8.10e-02  
14-Aug-2018 03:00:00, 8.10e-02  
14-Aug-2018 04:00:00, 8.10e-02  
14-Aug-2018 05:00:00, 8.10e-02  
14-Aug-2018 06:00:00, 8.10e-02  
14-Aug-2018 07:00:00, 8.10e-02



14-Aug-2018 08:00:00, 8.10e-02  
14-Aug-2018 09:00:00, 8.10e-02  
14-Aug-2018 10:00:00, 8.10e-02  
14-Aug-2018 11:00:00, 8.10e-02  
14-Aug-2018 12:00:00, 8.00e-02  
14-Aug-2018 13:00:00, 8.00e-02  
14-Aug-2018 14:00:00, 8.00e-02  
14-Aug-2018 15:00:00, 8.00e-02  
14-Aug-2018 16:00:00, 8.00e-02  
14-Aug-2018 17:00:00, 8.00e-02  
14-Aug-2018 18:00:00, 8.00e-02  
14-Aug-2018 19:00:00, 8.00e-02  
14-Aug-2018 20:00:00, 8.00e-02  
14-Aug-2018 21:00:00, 8.00e-02  
14-Aug-2018 22:00:00, 8.10e-02  
14-Aug-2018 23:00:00, 8.10e-02  
15-Aug-2018, 8.10e-02  
15-Aug-2018 01:00:00, 8.10e-02  
15-Aug-2018 02:00:00, 8.10e-02  
15-Aug-2018 03:00:00, 8.10e-02  
15-Aug-2018 04:00:00, 8.10e-02  
15-Aug-2018 05:00:00, 8.10e-02  
15-Aug-2018 06:00:00, 8.10e-02  
15-Aug-2018 07:00:00, 8.10e-02  
15-Aug-2018 08:00:00, 8.10e-02  
15-Aug-2018 09:00:00, 8.10e-02  
15-Aug-2018 10:00:00, 8.10e-02  
15-Aug-2018 11:00:00, 8.10e-02  
15-Aug-2018 12:00:00, 8.00e-02  
15-Aug-2018 13:00:00, 8.00e-02  
15-Aug-2018 14:00:00, 8.00e-02  
15-Aug-2018 15:00:00, 8.00e-02  
15-Aug-2018 16:00:00, 8.00e-02  
15-Aug-2018 17:00:00, 8.00e-02  
15-Aug-2018 18:00:00, 8.00e-02  
15-Aug-2018 19:00:00, 8.00e-02  
15-Aug-2018 20:00:00, 8.00e-02  
15-Aug-2018 21:00:00, 8.00e-02  
15-Aug-2018 22:00:00, 8.10e-02  
15-Aug-2018 23:00:00, 8.10e-02  
16-Aug-2018, 8.10e-02  
16-Aug-2018 01:00:00, 8.10e-02  
16-Aug-2018 02:00:00, 8.10e-02  
16-Aug-2018 03:00:00, 8.10e-02  
16-Aug-2018 04:00:00, 8.10e-02  
16-Aug-2018 05:00:00, 8.10e-02  
16-Aug-2018 06:00:00, 8.10e-02  
16-Aug-2018 07:00:00, 8.10e-02  
16-Aug-2018 08:00:00, 8.10e-02  
16-Aug-2018 09:00:00, 8.10e-02  
16-Aug-2018 10:00:00, 8.10e-02  
16-Aug-2018 11:00:00, 8.00e-02  
16-Aug-2018 12:00:00, 8.00e-02  
16-Aug-2018 13:00:00, 8.00e-02  
16-Aug-2018 14:00:00, 8.10e-02  
16-Aug-2018 15:00:00, 8.30e-02  
16-Aug-2018 16:00:00, 8.10e-02  
16-Aug-2018 17:00:00, 8.00e-02  
16-Aug-2018 18:00:00, 8.20e-02  
16-Aug-2018 19:00:00, 8.00e-02  
16-Aug-2018 20:00:00, 7.90e-02  
16-Aug-2018 21:00:00, 8.00e-02  
16-Aug-2018 22:00:00, 8.20e-02  
16-Aug-2018 23:00:00, 8.20e-02

17-Aug-2018, 8.20e-02  
17-Aug-2018 01:00:00, 8.20e-02  
17-Aug-2018 02:00:00, 8.20e-02  
17-Aug-2018 03:00:00, 8.20e-02  
17-Aug-2018 04:00:00, 8.20e-02  
17-Aug-2018 05:00:00, 8.20e-02  
17-Aug-2018 06:00:00, 8.20e-02  
17-Aug-2018 07:00:00, 8.30e-02  
17-Aug-2018 08:00:00, 8.30e-02  
17-Aug-2018 09:00:00, 8.10e-02  
17-Aug-2018 10:00:00, 8.00e-02  
17-Aug-2018 11:00:00, 7.90e-02  
17-Aug-2018 12:00:00, 7.90e-02  
17-Aug-2018 13:00:00, 7.90e-02  
17-Aug-2018 14:00:00, 7.90e-02  
17-Aug-2018 15:00:00, 7.90e-02  
17-Aug-2018 16:00:00, 7.90e-02  
17-Aug-2018 17:00:00, 7.90e-02  
17-Aug-2018 18:00:00, 7.90e-02  
17-Aug-2018 19:00:00, 7.90e-02  
17-Aug-2018 20:00:00, 7.90e-02  
17-Aug-2018 21:00:00, 7.90e-02  
17-Aug-2018 22:00:00, 7.90e-02  
17-Aug-2018 23:00:00, 7.90e-02  
18-Aug-2018, 7.90e-02  
18-Aug-2018 01:00:00, 7.90e-02  
18-Aug-2018 02:00:00, 7.90e-02  
18-Aug-2018 03:00:00, 7.90e-02  
18-Aug-2018 04:00:00, 7.90e-02  
18-Aug-2018 05:00:00, 7.90e-02  
18-Aug-2018 06:00:00, 7.90e-02  
18-Aug-2018 07:00:00, 7.90e-02  
18-Aug-2018 08:00:00, 8.00e-02  
18-Aug-2018 09:00:00, 8.30e-02  
18-Aug-2018 10:00:00, 8.30e-02  
18-Aug-2018 11:00:00, 8.30e-02  
18-Aug-2018 12:00:00, 8.10e-02  
18-Aug-2018 13:00:00, 7.90e-02  
18-Aug-2018 14:00:00, 7.90e-02  
18-Aug-2018 15:00:00, 7.90e-02  
18-Aug-2018 16:00:00, 7.90e-02  
18-Aug-2018 17:00:00, 7.90e-02  
18-Aug-2018 18:00:00, 7.90e-02  
18-Aug-2018 19:00:00, 7.90e-02  
18-Aug-2018 20:00:00, 7.90e-02  
18-Aug-2018 21:00:00, 7.90e-02  
18-Aug-2018 22:00:00, 7.90e-02  
18-Aug-2018 23:00:00, 7.90e-02  
19-Aug-2018, 7.90e-02  
19-Aug-2018 01:00:00, 7.90e-02  
19-Aug-2018 02:00:00, 7.90e-02  
19-Aug-2018 03:00:00, 7.90e-02  
19-Aug-2018 04:00:00, 7.90e-02  
19-Aug-2018 05:00:00, 7.90e-02  
19-Aug-2018 06:00:00, 7.90e-02  
19-Aug-2018 07:00:00, 8.00e-02  
19-Aug-2018 08:00:00, 7.90e-02  
19-Aug-2018 09:00:00, 7.90e-02  
19-Aug-2018 10:00:00, 7.90e-02  
19-Aug-2018 11:00:00, 7.90e-02  
19-Aug-2018 12:00:00, 7.90e-02  
19-Aug-2018 13:00:00, 7.90e-02  
19-Aug-2018 14:00:00, 7.90e-02  
19-Aug-2018 15:00:00, 7.90e-02

19-Aug-2018 16:00:00, 7.90e-02  
19-Aug-2018 17:00:00, 7.90e-02  
19-Aug-2018 18:00:00, 7.90e-02  
19-Aug-2018 19:00:00, 7.90e-02  
19-Aug-2018 20:00:00, 7.90e-02  
19-Aug-2018 21:00:00, 7.90e-02  
19-Aug-2018 22:00:00, 7.90e-02  
19-Aug-2018 23:00:00, 7.90e-02  
20-Aug-2018, 7.90e-02  
20-Aug-2018 01:00:00, 7.90e-02  
20-Aug-2018 02:00:00, 7.90e-02  
20-Aug-2018 03:00:00, 7.90e-02  
20-Aug-2018 04:00:00, 7.90e-02  
20-Aug-2018 05:00:00, 7.90e-02  
20-Aug-2018 06:00:00, 7.90e-02  
20-Aug-2018 07:00:00, 7.90e-02  
20-Aug-2018 08:00:00, 7.90e-02  
20-Aug-2018 09:00:00, 7.90e-02  
20-Aug-2018 10:00:00, 7.90e-02  
20-Aug-2018 11:00:00, 7.90e-02  
20-Aug-2018 12:00:00, 7.90e-02  
20-Aug-2018 13:00:00, 7.90e-02  
20-Aug-2018 14:00:00, 7.90e-02  
20-Aug-2018 15:00:00, 7.90e-02  
20-Aug-2018 16:00:00, 7.90e-02  
20-Aug-2018 17:00:00, 7.90e-02  
20-Aug-2018 18:00:00, 7.90e-02  
20-Aug-2018 19:00:00, 7.90e-02  
20-Aug-2018 20:00:00, 7.90e-02  
20-Aug-2018 21:00:00, 7.90e-02  
20-Aug-2018 22:00:00, 7.90e-02  
20-Aug-2018 23:00:00, 7.90e-02  
21-Aug-2018, 7.90e-02  
21-Aug-2018 01:00:00, 7.90e-02  
21-Aug-2018 02:00:00, 7.90e-02  
21-Aug-2018 03:00:00, 7.90e-02  
21-Aug-2018 04:00:00, 7.90e-02  
21-Aug-2018 05:00:00, 7.90e-02  
21-Aug-2018 06:00:00, 7.90e-02  
21-Aug-2018 07:00:00, 8.10e-02  
21-Aug-2018 08:00:00, 8.00e-02  
21-Aug-2018 09:00:00, 7.90e-02  
21-Aug-2018 10:00:00, 7.90e-02  
21-Aug-2018 11:00:00, 7.90e-02  
21-Aug-2018 12:00:00, 7.90e-02  
21-Aug-2018 13:00:00, 7.90e-02  
21-Aug-2018 14:00:00, 7.90e-02  
21-Aug-2018 15:00:00, 7.90e-02  
21-Aug-2018 16:00:00, 7.90e-02  
21-Aug-2018 17:00:00, 7.90e-02  
21-Aug-2018 18:00:00, 7.90e-02  
21-Aug-2018 19:00:00, 8.10e-02  
21-Aug-2018 20:00:00, 8.30e-02  
21-Aug-2018 21:00:00, 8.20e-02  
21-Aug-2018 22:00:00, 8.20e-02  
21-Aug-2018 23:00:00, 8.10e-02  
22-Aug-2018, 8.20e-02  
22-Aug-2018 01:00:00, 8.30e-02  
22-Aug-2018 02:00:00, 8.30e-02  
22-Aug-2018 03:00:00, 8.30e-02  
22-Aug-2018 04:00:00, 8.30e-02  
22-Aug-2018 05:00:00, 8.30e-02  
22-Aug-2018 06:00:00, 8.30e-02  
22-Aug-2018 07:00:00, 8.30e-02

22-Aug-2018 08:00:00, 8.30e-02  
22-Aug-2018 09:00:00, 8.30e-02  
22-Aug-2018 10:00:00, 8.10e-02  
22-Aug-2018 11:00:00, 8.00e-02  
22-Aug-2018 12:00:00, 7.90e-02  
22-Aug-2018 13:00:00, 7.90e-02  
22-Aug-2018 14:00:00, 7.90e-02  
22-Aug-2018 15:00:00, 7.90e-02  
22-Aug-2018 16:00:00, 7.90e-02  
22-Aug-2018 17:00:00, 7.90e-02  
22-Aug-2018 18:00:00, 7.90e-02  
22-Aug-2018 19:00:00, 8.00e-02  
22-Aug-2018 20:00:00, 8.10e-02  
22-Aug-2018 21:00:00, 8.10e-02  
22-Aug-2018 22:00:00, 8.10e-02  
22-Aug-2018 23:00:00, 8.00e-02  
23-Aug-2018, 8.00e-02  
23-Aug-2018 01:00:00, 7.90e-02  
23-Aug-2018 02:00:00, 7.90e-02  
23-Aug-2018 03:00:00, 7.90e-02  
23-Aug-2018 04:00:00, 7.90e-02  
23-Aug-2018 05:00:00, 8.10e-02  
23-Aug-2018 06:00:00, 8.30e-02  
23-Aug-2018 07:00:00, 8.20e-02  
23-Aug-2018 08:00:00, 8.00e-02  
23-Aug-2018 09:00:00, 8.20e-02  
23-Aug-2018 10:00:00, 8.00e-02  
23-Aug-2018 11:00:00, 7.90e-02  
23-Aug-2018 12:00:00, 7.90e-02  
23-Aug-2018 13:00:00, 7.90e-02  
23-Aug-2018 14:00:00, 7.90e-02  
23-Aug-2018 15:00:00, 7.90e-02  
23-Aug-2018 16:00:00, 7.90e-02  
23-Aug-2018 17:00:00, 7.90e-02  
23-Aug-2018 18:00:00, 8.00e-02  
23-Aug-2018 19:00:00, 7.90e-02  
23-Aug-2018 20:00:00, 7.90e-02  
23-Aug-2018 21:00:00, 7.90e-02  
23-Aug-2018 22:00:00, 7.90e-02  
23-Aug-2018 23:00:00, 7.90e-02  
24-Aug-2018, 7.90e-02  
24-Aug-2018 01:00:00, 7.90e-02  
24-Aug-2018 02:00:00, 7.90e-02  
24-Aug-2018 03:00:00, 7.90e-02  
24-Aug-2018 04:00:00, 7.90e-02  
24-Aug-2018 05:00:00, 7.90e-02  
24-Aug-2018 06:00:00, 7.90e-02  
24-Aug-2018 07:00:00, 7.90e-02  
24-Aug-2018 08:00:00, 7.90e-02  
24-Aug-2018 09:00:00, 7.90e-02  
24-Aug-2018 10:00:00, 7.90e-02  
24-Aug-2018 11:00:00, 7.90e-02  
24-Aug-2018 12:00:00, 7.90e-02  
24-Aug-2018 13:00:00, 7.90e-02  
24-Aug-2018 14:00:00, 7.90e-02  
24-Aug-2018 15:00:00, 7.90e-02  
24-Aug-2018 16:00:00, 7.90e-02  
24-Aug-2018 17:00:00, 7.90e-02  
24-Aug-2018 18:00:00, 7.90e-02  
24-Aug-2018 19:00:00, 7.90e-02  
24-Aug-2018 20:00:00, 7.90e-02  
24-Aug-2018 21:00:00, 7.90e-02  
24-Aug-2018 22:00:00, 7.90e-02  
24-Aug-2018 23:00:00, 7.90e-02

25-Aug-2018, 7.90e-02  
25-Aug-2018 01:00:00, 7.90e-02  
25-Aug-2018 02:00:00, 7.90e-02  
25-Aug-2018 03:00:00, 7.90e-02  
25-Aug-2018 04:00:00, 7.90e-02  
25-Aug-2018 05:00:00, 7.90e-02  
25-Aug-2018 06:00:00, 7.90e-02  
25-Aug-2018 07:00:00, 7.90e-02  
25-Aug-2018 08:00:00, 7.90e-02  
25-Aug-2018 09:00:00, 7.90e-02  
25-Aug-2018 10:00:00, 7.90e-02  
25-Aug-2018 11:00:00, 7.90e-02  
25-Aug-2018 12:00:00, 7.90e-02  
25-Aug-2018 13:00:00, 7.90e-02  
25-Aug-2018 14:00:00, 7.90e-02  
25-Aug-2018 15:00:00, 7.90e-02  
25-Aug-2018 16:00:00, 7.90e-02  
25-Aug-2018 17:00:00, 7.90e-02  
25-Aug-2018 18:00:00, 7.90e-02  
25-Aug-2018 19:00:00, 7.90e-02  
25-Aug-2018 20:00:00, 7.90e-02  
25-Aug-2018 21:00:00, 7.90e-02  
25-Aug-2018 22:00:00, 7.90e-02  
25-Aug-2018 23:00:00, 7.90e-02  
26-Aug-2018, 7.90e-02  
26-Aug-2018 01:00:00, 7.90e-02  
26-Aug-2018 02:00:00, 7.90e-02  
26-Aug-2018 03:00:00, 7.90e-02  
26-Aug-2018 04:00:00, 7.90e-02  
26-Aug-2018 05:00:00, 7.90e-02  
26-Aug-2018 06:00:00, 7.90e-02  
26-Aug-2018 07:00:00, 7.90e-02  
26-Aug-2018 08:00:00, 7.90e-02  
26-Aug-2018 09:00:00, 7.90e-02  
26-Aug-2018 10:00:00, 7.90e-02  
26-Aug-2018 11:00:00, 7.90e-02  
26-Aug-2018 12:00:00, 7.90e-02  
26-Aug-2018 13:00:00, 7.90e-02  
26-Aug-2018 14:00:00, 7.90e-02  
26-Aug-2018 15:00:00, 7.90e-02  
26-Aug-2018 16:00:00, 7.90e-02  
26-Aug-2018 17:00:00, 7.90e-02  
26-Aug-2018 18:00:00, 8.10e-02  
26-Aug-2018 19:00:00, 8.20e-02  
26-Aug-2018 20:00:00, 8.10e-02  
26-Aug-2018 21:00:00, 8.00e-02  
26-Aug-2018 22:00:00, 8.10e-02  
26-Aug-2018 23:00:00, 8.20e-02  
27-Aug-2018, 8.10e-02  
27-Aug-2018 01:00:00, 8.10e-02  
27-Aug-2018 02:00:00, 8.10e-02  
27-Aug-2018 03:00:00, 8.10e-02  
27-Aug-2018 04:00:00, 8.10e-02  
27-Aug-2018 05:00:00, 8.10e-02  
27-Aug-2018 06:00:00, 8.10e-02  
27-Aug-2018 07:00:00, 8.10e-02  
27-Aug-2018 08:00:00, 8.10e-02  
27-Aug-2018 09:00:00, 8.10e-02  
27-Aug-2018 10:00:00, 7.90e-02  
27-Aug-2018 11:00:00, 7.90e-02  
27-Aug-2018 12:00:00, 7.90e-02  
27-Aug-2018 13:00:00, 7.80e-02  
27-Aug-2018 14:00:00, 7.90e-02  
27-Aug-2018 15:00:00, 7.90e-02

27-Aug-2018 16:00:00, 7.90e-02  
27-Aug-2018 17:00:00, 7.90e-02  
27-Aug-2018 18:00:00, 7.90e-02  
27-Aug-2018 19:00:00, 7.90e-02  
27-Aug-2018 20:00:00, 7.90e-02  
27-Aug-2018 21:00:00, 7.90e-02  
27-Aug-2018 22:00:00, 7.90e-02  
27-Aug-2018 23:00:00, 7.90e-02  
28-Aug-2018, 7.90e-02  
28-Aug-2018 01:00:00, 7.90e-02  
28-Aug-2018 02:00:00, 7.90e-02  
28-Aug-2018 03:00:00, 7.90e-02  
28-Aug-2018 04:00:00, 7.90e-02  
28-Aug-2018 05:00:00, 7.90e-02  
28-Aug-2018 06:00:00, 7.90e-02  
28-Aug-2018 07:00:00, 7.90e-02  
28-Aug-2018 08:00:00, 7.90e-02  
28-Aug-2018 09:00:00, 7.90e-02  
28-Aug-2018 10:00:00, 7.90e-02  
28-Aug-2018 11:00:00, 7.90e-02  
28-Aug-2018 12:00:00, 7.90e-02  
28-Aug-2018 13:00:00, 7.90e-02  
28-Aug-2018 14:00:00, 7.90e-02  
28-Aug-2018 15:00:00, 7.90e-02  
28-Aug-2018 16:00:00, 7.90e-02  
28-Aug-2018 17:00:00, 7.90e-02  
28-Aug-2018 18:00:00, 7.90e-02  
28-Aug-2018 19:00:00, 7.90e-02  
28-Aug-2018 20:00:00, 7.90e-02  
28-Aug-2018 21:00:00, 7.90e-02  
28-Aug-2018 22:00:00, 7.90e-02  
28-Aug-2018 23:00:00, 7.90e-02  
29-Aug-2018, 7.90e-02  
29-Aug-2018 01:00:00, 7.90e-02  
29-Aug-2018 02:00:00, 7.90e-02  
29-Aug-2018 03:00:00, 7.90e-02  
29-Aug-2018 04:00:00, 7.90e-02  
29-Aug-2018 05:00:00, 7.90e-02  
29-Aug-2018 06:00:00, 7.90e-02  
29-Aug-2018 07:00:00, 7.90e-02  
29-Aug-2018 08:00:00, 7.90e-02  
29-Aug-2018 09:00:00, 7.90e-02  
29-Aug-2018 10:00:00, 7.90e-02  
29-Aug-2018 11:00:00, 7.90e-02  
29-Aug-2018 12:00:00, 7.90e-02  
29-Aug-2018 13:00:00, 7.90e-02  
29-Aug-2018 14:00:00, 7.90e-02  
29-Aug-2018 15:00:00, 7.80e-02  
29-Aug-2018 16:00:00, 7.80e-02  
29-Aug-2018 17:00:00, 7.80e-02  
29-Aug-2018 18:00:00, 7.80e-02  
29-Aug-2018 19:00:00, 7.80e-02  
29-Aug-2018 20:00:00, 7.80e-02  
29-Aug-2018 21:00:00, 7.80e-02  
29-Aug-2018 22:00:00, 7.80e-02  
29-Aug-2018 23:00:00, 7.80e-02  
30-Aug-2018, 7.90e-02  
30-Aug-2018 01:00:00, 7.90e-02  
30-Aug-2018 02:00:00, 7.90e-02  
30-Aug-2018 03:00:00, 7.90e-02  
30-Aug-2018 04:00:00, 7.90e-02  
30-Aug-2018 05:00:00, 7.90e-02  
30-Aug-2018 06:00:00, 7.90e-02  
30-Aug-2018 07:00:00, 7.90e-02

30-Aug-2018 08:00:00, 7.90e-02  
30-Aug-2018 09:00:00, 7.80e-02  
30-Aug-2018 10:00:00, 7.80e-02  
30-Aug-2018 11:00:00, 7.80e-02  
30-Aug-2018 12:00:00, 7.80e-02  
30-Aug-2018 13:00:00, 7.80e-02  
30-Aug-2018 14:00:00, 7.80e-02  
30-Aug-2018 15:00:00, 7.80e-02  
30-Aug-2018 16:00:00, 7.80e-02  
30-Aug-2018 17:00:00, 7.80e-02  
30-Aug-2018 18:00:00, 7.80e-02  
30-Aug-2018 19:00:00, 7.80e-02  
30-Aug-2018 20:00:00, 7.80e-02  
30-Aug-2018 21:00:00, 7.80e-02  
30-Aug-2018 22:00:00, 7.80e-02  
30-Aug-2018 23:00:00, 7.90e-02  
31-Aug-2018, 7.90e-02  
31-Aug-2018 01:00:00, 7.90e-02  
31-Aug-2018 02:00:00, 7.90e-02  
31-Aug-2018 03:00:00, 7.90e-02  
31-Aug-2018 04:00:00, 7.90e-02  
31-Aug-2018 05:00:00, 7.90e-02  
31-Aug-2018 06:00:00, 7.90e-02  
31-Aug-2018 07:00:00, 7.90e-02  
31-Aug-2018 08:00:00, 7.90e-02  
31-Aug-2018 09:00:00, 7.90e-02  
31-Aug-2018 10:00:00, 7.90e-02  
31-Aug-2018 11:00:00, 7.90e-02  
31-Aug-2018 12:00:00, 7.90e-02  
31-Aug-2018 13:00:00, 7.90e-02  
31-Aug-2018 14:00:00, 7.80e-02  
31-Aug-2018 15:00:00, 7.80e-02  
31-Aug-2018 16:00:00, 7.80e-02  
31-Aug-2018 17:00:00, 7.80e-02  
31-Aug-2018 18:00:00, 7.80e-02  
31-Aug-2018 19:00:00, 7.80e-02  
31-Aug-2018 20:00:00, 7.80e-02  
31-Aug-2018 21:00:00, 7.90e-02  
31-Aug-2018 22:00:00, 7.90e-02  
31-Aug-2018 23:00:00, 7.90e-02  
01-Sep-2018, 7.90e-02  
01-Sep-2018 01:00:00, 7.90e-02  
01-Sep-2018 02:00:00, 7.90e-02  
01-Sep-2018 03:00:00, 7.90e-02  
01-Sep-2018 04:00:00, 7.90e-02  
01-Sep-2018 05:00:00, 7.90e-02  
01-Sep-2018 06:00:00, 7.90e-02  
01-Sep-2018 07:00:00, 7.90e-02  
01-Sep-2018 08:00:00, 7.90e-02  
01-Sep-2018 09:00:00, 7.90e-02  
01-Sep-2018 10:00:00, 7.90e-02  
01-Sep-2018 11:00:00, 7.90e-02  
01-Sep-2018 12:00:00, 7.90e-02  
01-Sep-2018 13:00:00, 7.90e-02  
01-Sep-2018 14:00:00, 7.90e-02  
01-Sep-2018 15:00:00, 7.80e-02  
01-Sep-2018 16:00:00, 7.90e-02  
01-Sep-2018 17:00:00, 7.80e-02  
01-Sep-2018 18:00:00, 7.80e-02  
01-Sep-2018 19:00:00, 7.80e-02  
01-Sep-2018 20:00:00, 7.80e-02  
01-Sep-2018 21:00:00, 7.90e-02  
01-Sep-2018 22:00:00, 7.90e-02  
01-Sep-2018 23:00:00, 7.90e-02

02-Sep-2018, 7.90e-02  
02-Sep-2018 01:00:00, 7.90e-02  
02-Sep-2018 02:00:00, 7.90e-02  
02-Sep-2018 03:00:00, 7.90e-02  
02-Sep-2018 04:00:00, 7.90e-02  
02-Sep-2018 05:00:00, 7.90e-02  
02-Sep-2018 06:00:00, 7.90e-02  
02-Sep-2018 07:00:00, 7.90e-02  
02-Sep-2018 08:00:00, 7.90e-02  
02-Sep-2018 09:00:00, 7.90e-02  
02-Sep-2018 10:00:00, 7.90e-02  
02-Sep-2018 11:00:00, 7.90e-02  
02-Sep-2018 12:00:00, 7.90e-02  
02-Sep-2018 13:00:00, 7.90e-02  
02-Sep-2018 14:00:00, 7.90e-02  
02-Sep-2018 15:00:00, 8.00e-02  
02-Sep-2018 16:00:00, 7.80e-02  
02-Sep-2018 17:00:00, 7.90e-02  
02-Sep-2018 18:00:00, 8.00e-02  
02-Sep-2018 19:00:00, 7.90e-02  
02-Sep-2018 20:00:00, 7.80e-02  
02-Sep-2018 21:00:00, 7.80e-02  
02-Sep-2018 22:00:00, 7.90e-02  
02-Sep-2018 23:00:00, 7.90e-02  
03-Sep-2018, 7.90e-02  
03-Sep-2018 01:00:00, 7.90e-02  
03-Sep-2018 02:00:00, 7.90e-02  
03-Sep-2018 03:00:00, 7.90e-02  
03-Sep-2018 04:00:00, 7.90e-02  
03-Sep-2018 05:00:00, 7.90e-02  
03-Sep-2018 06:00:00, 7.90e-02  
03-Sep-2018 07:00:00, 7.90e-02  
03-Sep-2018 08:00:00, 7.90e-02  
03-Sep-2018 09:00:00, 7.90e-02  
03-Sep-2018 10:00:00, 7.90e-02  
03-Sep-2018 11:00:00, 7.90e-02  
03-Sep-2018 12:00:00, 7.90e-02  
03-Sep-2018 13:00:00, 7.90e-02  
03-Sep-2018 14:00:00, 7.90e-02  
03-Sep-2018 15:00:00, 7.90e-02  
03-Sep-2018 16:00:00, 7.90e-02  
03-Sep-2018 17:00:00, 7.90e-02  
03-Sep-2018 18:00:00, 7.90e-02  
03-Sep-2018 19:00:00, 7.90e-02  
03-Sep-2018 20:00:00, 7.90e-02  
03-Sep-2018 21:00:00, 7.90e-02  
03-Sep-2018 22:00:00, 7.90e-02  
03-Sep-2018 23:00:00, 7.90e-02  
04-Sep-2018, 7.90e-02  
04-Sep-2018 01:00:00, 7.90e-02  
04-Sep-2018 02:00:00, 7.90e-02  
04-Sep-2018 03:00:00, 7.90e-02  
04-Sep-2018 04:00:00, 7.90e-02  
04-Sep-2018 05:00:00, 7.90e-02  
04-Sep-2018 06:00:00, 7.90e-02  
04-Sep-2018 07:00:00, 7.90e-02  
04-Sep-2018 08:00:00, 7.90e-02  
04-Sep-2018 09:00:00, 7.90e-02  
04-Sep-2018 10:00:00, 7.90e-02  
04-Sep-2018 11:00:00, 7.90e-02  
04-Sep-2018 12:00:00, 7.90e-02  
04-Sep-2018 13:00:00, 7.80e-02  
04-Sep-2018 14:00:00, 7.80e-02  
04-Sep-2018 15:00:00, 7.80e-02



04-Sep-2018 16:00:00, 7.80e-02  
04-Sep-2018 17:00:00, 7.80e-02  
04-Sep-2018 18:00:00, 7.80e-02  
04-Sep-2018 19:00:00, 7.80e-02  
04-Sep-2018 20:00:00, 7.80e-02  
04-Sep-2018 21:00:00, 7.80e-02  
04-Sep-2018 22:00:00, 7.80e-02  
04-Sep-2018 23:00:00, 7.80e-02  
05-Sep-2018, 7.80e-02  
05-Sep-2018 01:00:00, 7.90e-02  
05-Sep-2018 02:00:00, 7.90e-02  
05-Sep-2018 03:00:00, 7.80e-02  
05-Sep-2018 04:00:00, 7.80e-02  
05-Sep-2018 05:00:00, 7.80e-02  
05-Sep-2018 06:00:00, 7.80e-02  
05-Sep-2018 07:00:00, 7.80e-02  
05-Sep-2018 08:00:00, 7.80e-02  
05-Sep-2018 09:00:00, 7.90e-02  
05-Sep-2018 10:00:00, 8.10e-02  
05-Sep-2018 11:00:00, 8.10e-02  
05-Sep-2018 12:00:00, 7.80e-02  
05-Sep-2018 13:00:00, 7.80e-02  
05-Sep-2018 14:00:00, 7.80e-02  
05-Sep-2018 15:00:00, 8.10e-02  
05-Sep-2018 16:00:00, 8.10e-02  
05-Sep-2018 17:00:00, 8.10e-02  
05-Sep-2018 18:00:00, 8.00e-02  
05-Sep-2018 19:00:00, 7.70e-02  
05-Sep-2018 20:00:00, 7.70e-02  
05-Sep-2018 21:00:00, 7.70e-02  
05-Sep-2018 22:00:00, 7.70e-02  
05-Sep-2018 23:00:00, 7.70e-02  
06-Sep-2018, 7.70e-02  
06-Sep-2018 01:00:00, 7.70e-02  
06-Sep-2018 02:00:00, 7.70e-02  
06-Sep-2018 03:00:00, 7.70e-02  
06-Sep-2018 04:00:00, 7.70e-02  
06-Sep-2018 05:00:00, 7.80e-02  
06-Sep-2018 06:00:00, 7.90e-02  
06-Sep-2018 07:00:00, 7.90e-02  
06-Sep-2018 08:00:00, 7.90e-02  
06-Sep-2018 09:00:00, 7.90e-02  
06-Sep-2018 10:00:00, 7.70e-02  
06-Sep-2018 11:00:00, 7.70e-02  
06-Sep-2018 12:00:00, 7.70e-02  
06-Sep-2018 13:00:00, 7.70e-02  
06-Sep-2018 14:00:00, 7.70e-02  
06-Sep-2018 15:00:00, 7.70e-02  
06-Sep-2018 16:00:00, 7.70e-02  
06-Sep-2018 17:00:00, 7.70e-02  
06-Sep-2018 18:00:00, 7.70e-02  
06-Sep-2018 19:00:00, 7.70e-02  
06-Sep-2018 20:00:00, 7.70e-02  
06-Sep-2018 21:00:00, 7.70e-02  
06-Sep-2018 22:00:00, 7.70e-02  
06-Sep-2018 23:00:00, 7.70e-02  
07-Sep-2018, 7.70e-02  
07-Sep-2018 01:00:00, 7.70e-02  
07-Sep-2018 02:00:00, 7.70e-02  
07-Sep-2018 03:00:00, 7.70e-02  
07-Sep-2018 04:00:00, 7.70e-02  
07-Sep-2018 05:00:00, 7.70e-02  
07-Sep-2018 06:00:00, 7.70e-02  
07-Sep-2018 07:00:00, 7.70e-02

07-Sep-2018 08:00:00, 7.70e-02  
07-Sep-2018 09:00:00, 7.70e-02  
07-Sep-2018 10:00:00, 7.70e-02  
07-Sep-2018 11:00:00, 7.70e-02  
07-Sep-2018 12:00:00, 7.70e-02  
07-Sep-2018 13:00:00, 7.70e-02  
07-Sep-2018 14:00:00, 7.70e-02  
07-Sep-2018 15:00:00, 7.70e-02  
07-Sep-2018 16:00:00, 7.70e-02  
07-Sep-2018 17:00:00, 7.70e-02  
07-Sep-2018 18:00:00, 7.70e-02  
07-Sep-2018 19:00:00, 7.70e-02  
07-Sep-2018 20:00:00, 7.70e-02  
07-Sep-2018 21:00:00, 7.70e-02  
07-Sep-2018 22:00:00, 7.70e-02  
07-Sep-2018 23:00:00, 7.70e-02  
08-Sep-2018, 7.70e-02  
08-Sep-2018 01:00:00, 7.70e-02  
08-Sep-2018 02:00:00, 7.70e-02  
08-Sep-2018 03:00:00, 7.70e-02  
08-Sep-2018 04:00:00, 7.70e-02  
08-Sep-2018 05:00:00, 7.70e-02  
08-Sep-2018 06:00:00, 7.70e-02  
08-Sep-2018 07:00:00, 7.70e-02  
08-Sep-2018 08:00:00, 7.70e-02  
08-Sep-2018 09:00:00, 7.70e-02  
08-Sep-2018 10:00:00, 7.70e-02  
08-Sep-2018 11:00:00, 7.70e-02  
08-Sep-2018 12:00:00, 7.70e-02  
08-Sep-2018 13:00:00, 7.70e-02  
08-Sep-2018 14:00:00, 7.70e-02  
08-Sep-2018 15:00:00, 7.70e-02  
08-Sep-2018 16:00:00, 7.70e-02  
08-Sep-2018 17:00:00, 7.70e-02  
08-Sep-2018 18:00:00, 7.70e-02  
08-Sep-2018 19:00:00, 7.70e-02  
08-Sep-2018 20:00:00, 7.70e-02  
08-Sep-2018 21:00:00, 7.70e-02  
08-Sep-2018 22:00:00, 7.70e-02  
08-Sep-2018 23:00:00, 7.70e-02  
09-Sep-2018, 7.70e-02  
09-Sep-2018 01:00:00, 7.70e-02  
09-Sep-2018 02:00:00, 7.80e-02  
09-Sep-2018 03:00:00, 8.00e-02  
09-Sep-2018 04:00:00, 8.00e-02  
09-Sep-2018 05:00:00, 7.90e-02  
09-Sep-2018 06:00:00, 7.90e-02  
09-Sep-2018 07:00:00, 7.80e-02  
09-Sep-2018 08:00:00, 7.70e-02  
09-Sep-2018 09:00:00, 7.70e-02  
09-Sep-2018 10:00:00, 7.70e-02  
09-Sep-2018 11:00:00, 7.70e-02  
09-Sep-2018 12:00:00, 7.70e-02  
09-Sep-2018 13:00:00, 7.70e-02  
09-Sep-2018 14:00:00, 7.70e-02  
09-Sep-2018 15:00:00, 7.70e-02  
09-Sep-2018 16:00:00, 7.70e-02  
09-Sep-2018 17:00:00, 7.70e-02  
09-Sep-2018 18:00:00, 7.70e-02  
09-Sep-2018 19:00:00, 7.70e-02  
09-Sep-2018 20:00:00, 7.70e-02  
09-Sep-2018 21:00:00, 7.70e-02  
09-Sep-2018 22:00:00, 7.70e-02  
09-Sep-2018 23:00:00, 7.70e-02

10-Sep-2018, 7.70e-02  
10-Sep-2018 01:00:00, 7.80e-02  
10-Sep-2018 02:00:00, 7.80e-02  
10-Sep-2018 03:00:00, 7.80e-02  
10-Sep-2018 04:00:00, 7.80e-02  
10-Sep-2018 05:00:00, 7.80e-02  
10-Sep-2018 06:00:00, 7.80e-02  
10-Sep-2018 07:00:00, 7.80e-02  
10-Sep-2018 08:00:00, 7.80e-02  
10-Sep-2018 09:00:00, 7.80e-02  
10-Sep-2018 10:00:00, 7.70e-02  
10-Sep-2018 11:00:00, 7.70e-02  
10-Sep-2018 12:00:00, 7.70e-02  
10-Sep-2018 13:00:00, 7.70e-02  
10-Sep-2018 14:00:00, 7.70e-02  
10-Sep-2018 15:00:00, 7.70e-02  
10-Sep-2018 16:00:00, 7.70e-02  
10-Sep-2018 17:00:00, 7.70e-02  
10-Sep-2018 18:00:00, 7.70e-02  
10-Sep-2018 19:00:00, 7.70e-02  
10-Sep-2018 20:00:00, 7.70e-02  
10-Sep-2018 21:00:00, 7.70e-02  
10-Sep-2018 22:00:00, 7.80e-02  
10-Sep-2018 23:00:00, 7.80e-02  
11-Sep-2018, 7.80e-02  
11-Sep-2018 01:00:00, 7.80e-02  
11-Sep-2018 02:00:00, 7.80e-02  
11-Sep-2018 03:00:00, 7.80e-02  
11-Sep-2018 04:00:00, 7.80e-02  
11-Sep-2018 05:00:00, 7.80e-02  
11-Sep-2018 06:00:00, 7.80e-02  
11-Sep-2018 07:00:00, 7.80e-02  
11-Sep-2018 08:00:00, 7.80e-02  
11-Sep-2018 09:00:00, 7.80e-02  
11-Sep-2018 10:00:00, 7.80e-02  
11-Sep-2018 11:00:00, 7.80e-02  
11-Sep-2018 12:00:00, 7.80e-02  
11-Sep-2018 13:00:00, 7.70e-02  
11-Sep-2018 14:00:00, 7.70e-02  
11-Sep-2018 15:00:00, 7.70e-02  
11-Sep-2018 16:00:00, 7.70e-02  
11-Sep-2018 17:00:00, 7.70e-02  
11-Sep-2018 18:00:00, 7.70e-02  
11-Sep-2018 19:00:00, 7.70e-02  
11-Sep-2018 20:00:00, 7.80e-02  
11-Sep-2018 21:00:00, 7.80e-02  
11-Sep-2018 22:00:00, 7.80e-02  
11-Sep-2018 23:00:00, 7.80e-02  
12-Sep-2018, 7.80e-02  
12-Sep-2018 01:00:00, 7.80e-02  
12-Sep-2018 02:00:00, 7.80e-02  
12-Sep-2018 03:00:00, 7.80e-02  
12-Sep-2018 04:00:00, 7.80e-02  
12-Sep-2018 05:00:00, 7.80e-02  
12-Sep-2018 06:00:00, 7.80e-02  
12-Sep-2018 07:00:00, 7.90e-02  
12-Sep-2018 08:00:00, 7.80e-02  
12-Sep-2018 09:00:00, 7.80e-02  
12-Sep-2018 10:00:00, 7.80e-02  
12-Sep-2018 11:00:00, 7.80e-02  
12-Sep-2018 12:00:00, 7.80e-02  
12-Sep-2018 13:00:00, 7.80e-02  
12-Sep-2018 14:00:00, 7.80e-02  
12-Sep-2018 15:00:00, 7.80e-02

12-Sep-2018 16:00:00, 7.80e-02  
12-Sep-2018 17:00:00, 7.80e-02  
12-Sep-2018 18:00:00, 7.80e-02  
12-Sep-2018 19:00:00, 7.80e-02  
12-Sep-2018 20:00:00, 7.80e-02  
12-Sep-2018 21:00:00, 7.80e-02  
12-Sep-2018 22:00:00, 7.80e-02  
12-Sep-2018 23:00:00, 7.80e-02  
13-Sep-2018, 7.80e-02  
13-Sep-2018 01:00:00, 7.80e-02  
13-Sep-2018 02:00:00, 7.80e-02  
13-Sep-2018 03:00:00, 7.90e-02  
13-Sep-2018 04:00:00, 7.90e-02  
13-Sep-2018 05:00:00, 7.90e-02  
13-Sep-2018 06:00:00, 7.90e-02  
13-Sep-2018 07:00:00, 7.90e-02  
13-Sep-2018 08:00:00, 7.90e-02  
13-Sep-2018 09:00:00, 7.80e-02  
13-Sep-2018 10:00:00, 7.80e-02  
13-Sep-2018 11:00:00, 7.80e-02  
13-Sep-2018 12:00:00, 7.80e-02  
13-Sep-2018 13:00:00, 7.80e-02  
13-Sep-2018 14:00:00, 7.80e-02  
13-Sep-2018 15:00:00, 7.80e-02  
13-Sep-2018 16:00:00, 7.80e-02  
13-Sep-2018 17:00:00, 7.80e-02  
13-Sep-2018 18:00:00, 7.80e-02  
13-Sep-2018 19:00:00, 7.80e-02  
13-Sep-2018 20:00:00, 7.80e-02  
13-Sep-2018 21:00:00, 7.80e-02  
13-Sep-2018 22:00:00, 7.90e-02  
13-Sep-2018 23:00:00, 7.90e-02  
14-Sep-2018, 7.90e-02  
14-Sep-2018 01:00:00, 7.90e-02  
14-Sep-2018 02:00:00, 7.90e-02  
14-Sep-2018 03:00:00, 7.90e-02  
14-Sep-2018 04:00:00, 7.90e-02  
14-Sep-2018 05:00:00, 7.90e-02  
14-Sep-2018 06:00:00, 7.90e-02  
14-Sep-2018 07:00:00, 7.90e-02  
14-Sep-2018 08:00:00, 7.90e-02  
14-Sep-2018 09:00:00, 7.90e-02  
14-Sep-2018 10:00:00, 7.80e-02  
14-Sep-2018 11:00:00, 7.80e-02  
14-Sep-2018 12:00:00, 7.80e-02  
14-Sep-2018 13:00:00, 7.80e-02  
14-Sep-2018 14:00:00, 7.80e-02  
14-Sep-2018 15:00:00, 7.80e-02  
14-Sep-2018 16:00:00, 7.80e-02  
14-Sep-2018 17:00:00, 7.80e-02  
14-Sep-2018 18:00:00, 7.80e-02  
14-Sep-2018 19:00:00, 7.80e-02  
14-Sep-2018 20:00:00, 7.80e-02  
14-Sep-2018 21:00:00, 7.90e-02  
14-Sep-2018 22:00:00, 7.90e-02  
14-Sep-2018 23:00:00, 7.90e-02  
15-Sep-2018, 7.90e-02  
15-Sep-2018 01:00:00, 7.90e-02  
15-Sep-2018 02:00:00, 7.90e-02  
15-Sep-2018 03:00:00, 7.90e-02  
15-Sep-2018 04:00:00, 7.90e-02  
15-Sep-2018 05:00:00, 7.90e-02  
15-Sep-2018 06:00:00, 7.90e-02  
15-Sep-2018 07:00:00, 7.90e-02

15-Sep-2018 08:00:00, 7.90e-02  
15-Sep-2018 09:00:00, 7.90e-02  
15-Sep-2018 10:00:00, 7.90e-02  
15-Sep-2018 11:00:00, 7.80e-02  
15-Sep-2018 12:00:00, 7.80e-02  
15-Sep-2018 13:00:00, 7.80e-02  
15-Sep-2018 14:00:00, 7.80e-02  
15-Sep-2018 15:00:00, 7.80e-02  
15-Sep-2018 16:00:00, 7.80e-02  
15-Sep-2018 17:00:00, 7.80e-02  
15-Sep-2018 18:00:00, 7.80e-02  
15-Sep-2018 19:00:00, 7.80e-02  
15-Sep-2018 20:00:00, 7.80e-02  
15-Sep-2018 21:00:00, 7.80e-02  
15-Sep-2018 22:00:00, 7.90e-02  
15-Sep-2018 23:00:00, 7.90e-02  
16-Sep-2018, 7.90e-02  
16-Sep-2018 01:00:00, 7.90e-02  
16-Sep-2018 02:00:00, 7.90e-02  
16-Sep-2018 03:00:00, 7.90e-02  
16-Sep-2018 04:00:00, 7.90e-02  
16-Sep-2018 05:00:00, 7.90e-02  
16-Sep-2018 06:00:00, 7.90e-02  
16-Sep-2018 07:00:00, 7.90e-02  
16-Sep-2018 08:00:00, 7.90e-02  
16-Sep-2018 09:00:00, 7.90e-02  
16-Sep-2018 10:00:00, 7.90e-02  
16-Sep-2018 11:00:00, 7.80e-02  
16-Sep-2018 12:00:00, 7.80e-02  
16-Sep-2018 13:00:00, 7.80e-02  
16-Sep-2018 14:00:00, 7.80e-02  
16-Sep-2018 15:00:00, 7.80e-02  
16-Sep-2018 16:00:00, 7.80e-02  
16-Sep-2018 17:00:00, 7.80e-02  
16-Sep-2018 18:00:00, 7.80e-02  
16-Sep-2018 19:00:00, 7.80e-02  
16-Sep-2018 20:00:00, 7.80e-02  
16-Sep-2018 21:00:00, 7.90e-02  
16-Sep-2018 22:00:00, 7.90e-02  
16-Sep-2018 23:00:00, 7.90e-02  
17-Sep-2018, 7.90e-02  
17-Sep-2018 01:00:00, 7.90e-02  
17-Sep-2018 02:00:00, 7.90e-02  
17-Sep-2018 03:00:00, 7.90e-02  
17-Sep-2018 04:00:00, 7.90e-02  
17-Sep-2018 05:00:00, 7.90e-02  
17-Sep-2018 06:00:00, 7.90e-02  
17-Sep-2018 07:00:00, 7.90e-02  
17-Sep-2018 08:00:00, 7.90e-02  
17-Sep-2018 09:00:00, 7.90e-02  
17-Sep-2018 10:00:00, 7.90e-02  
17-Sep-2018 11:00:00, 7.90e-02  
17-Sep-2018 12:00:00, 7.90e-02  
17-Sep-2018 13:00:00, 7.90e-02  
17-Sep-2018 14:00:00, 7.90e-02  
17-Sep-2018 15:00:00, 7.80e-02  
17-Sep-2018 16:00:00, 7.80e-02  
17-Sep-2018 17:00:00, 7.80e-02  
17-Sep-2018 18:00:00, 7.80e-02  
17-Sep-2018 19:00:00, 7.90e-02  
17-Sep-2018 20:00:00, 7.90e-02  
17-Sep-2018 21:00:00, 7.90e-02  
17-Sep-2018 22:00:00, 7.90e-02  
17-Sep-2018 23:00:00, 7.90e-02

18-Sep-2018, 7.90e-02  
18-Sep-2018 01:00:00, 7.90e-02  
18-Sep-2018 02:00:00, 7.90e-02  
18-Sep-2018 03:00:00, 7.90e-02  
18-Sep-2018 04:00:00, 7.90e-02  
18-Sep-2018 05:00:00, 7.90e-02  
18-Sep-2018 06:00:00, 7.90e-02  
18-Sep-2018 07:00:00, 7.90e-02  
18-Sep-2018 08:00:00, 7.90e-02  
18-Sep-2018 09:00:00, 7.90e-02  
18-Sep-2018 10:00:00, 7.90e-02  
18-Sep-2018 11:00:00, 7.90e-02  
18-Sep-2018 12:00:00, 7.90e-02  
18-Sep-2018 13:00:00, 7.90e-02  
18-Sep-2018 14:00:00, 7.90e-02  
18-Sep-2018 15:00:00, 7.80e-02  
18-Sep-2018 16:00:00, 7.80e-02  
18-Sep-2018 17:00:00, 7.80e-02  
18-Sep-2018 18:00:00, 7.80e-02  
18-Sep-2018 19:00:00, 7.90e-02  
18-Sep-2018 20:00:00, 7.90e-02  
18-Sep-2018 21:00:00, 7.90e-02  
18-Sep-2018 22:00:00, 7.90e-02  
18-Sep-2018 23:00:00, 7.90e-02  
19-Sep-2018, 7.90e-02  
19-Sep-2018 01:00:00, 7.90e-02  
19-Sep-2018 02:00:00, 7.90e-02  
19-Sep-2018 03:00:00, 7.90e-02  
19-Sep-2018 04:00:00, 7.90e-02  
19-Sep-2018 05:00:00, 7.90e-02  
19-Sep-2018 06:00:00, 7.90e-02  
19-Sep-2018 07:00:00, 7.90e-02  
19-Sep-2018 08:00:00, 7.90e-02  
19-Sep-2018 09:00:00, 7.90e-02  
19-Sep-2018 10:00:00, 7.90e-02  
19-Sep-2018 11:00:00, 7.90e-02  
19-Sep-2018 12:00:00, 7.90e-02  
19-Sep-2018 13:00:00, 7.90e-02  
19-Sep-2018 14:00:00, 7.90e-02  
19-Sep-2018 15:00:00, 8.00e-02  
19-Sep-2018 16:00:00, 8.20e-02  
19-Sep-2018 17:00:00, 8.20e-02  
19-Sep-2018 18:00:00, 8.20e-02  
19-Sep-2018 19:00:00, 8.10e-02  
19-Sep-2018 20:00:00, 8.10e-02  
19-Sep-2018 21:00:00, 8.20e-02  
19-Sep-2018 22:00:00, 8.10e-02  
19-Sep-2018 23:00:00, 8.10e-02  
20-Sep-2018, 8.20e-02  
20-Sep-2018 01:00:00, 8.20e-02  
20-Sep-2018 02:00:00, 8.20e-02  
20-Sep-2018 03:00:00, 8.10e-02  
20-Sep-2018 04:00:00, 8.10e-02  
20-Sep-2018 05:00:00, 8.10e-02  
20-Sep-2018 06:00:00, 8.10e-02  
20-Sep-2018 07:00:00, 8.10e-02  
20-Sep-2018 08:00:00, 8.10e-02  
20-Sep-2018 09:00:00, 8.00e-02  
20-Sep-2018 10:00:00, 7.80e-02  
20-Sep-2018 11:00:00, 7.80e-02  
20-Sep-2018 12:00:00, 7.80e-02  
20-Sep-2018 13:00:00, 7.80e-02  
20-Sep-2018 14:00:00, 7.80e-02  
20-Sep-2018 15:00:00, 7.80e-02

20-Sep-2018 16:00:00, 7.80e-02  
20-Sep-2018 17:00:00, 7.80e-02  
20-Sep-2018 18:00:00, 7.80e-02  
20-Sep-2018 19:00:00, 7.80e-02  
20-Sep-2018 20:00:00, 7.80e-02  
20-Sep-2018 21:00:00, 7.80e-02  
20-Sep-2018 22:00:00, 7.80e-02  
20-Sep-2018 23:00:00, 7.80e-02  
21-Sep-2018, 7.80e-02  
21-Sep-2018 01:00:00, 7.80e-02  
21-Sep-2018 02:00:00, 7.80e-02  
21-Sep-2018 03:00:00, 7.80e-02  
21-Sep-2018 04:00:00, 7.80e-02  
21-Sep-2018 05:00:00, 7.80e-02  
21-Sep-2018 06:00:00, 7.80e-02  
21-Sep-2018 07:00:00, 7.80e-02  
21-Sep-2018 08:00:00, 7.80e-02  
21-Sep-2018 09:00:00, 7.80e-02  
21-Sep-2018 10:00:00, 7.80e-02  
21-Sep-2018 11:00:00, 7.80e-02  
21-Sep-2018 12:00:00, 7.80e-02  
21-Sep-2018 13:00:00, 7.80e-02  
21-Sep-2018 14:00:00, 7.80e-02  
21-Sep-2018 15:00:00, 7.80e-02  
21-Sep-2018 16:00:00, 7.80e-02  
21-Sep-2018 17:00:00, 7.70e-02  
21-Sep-2018 18:00:00, 7.80e-02  
21-Sep-2018 19:00:00, 7.80e-02  
21-Sep-2018 20:00:00, 7.80e-02  
21-Sep-2018 21:00:00, 7.80e-02  
21-Sep-2018 22:00:00, 7.80e-02  
21-Sep-2018 23:00:00, 7.80e-02  
22-Sep-2018, 7.80e-02  
22-Sep-2018 01:00:00, 7.80e-02  
22-Sep-2018 02:00:00, 7.80e-02  
22-Sep-2018 03:00:00, 7.80e-02  
22-Sep-2018 04:00:00, 7.80e-02  
22-Sep-2018 05:00:00, 7.80e-02  
22-Sep-2018 06:00:00, 7.80e-02  
22-Sep-2018 07:00:00, 7.80e-02  
22-Sep-2018 08:00:00, 7.80e-02  
22-Sep-2018 09:00:00, 7.80e-02  
22-Sep-2018 10:00:00, 7.70e-02  
22-Sep-2018 11:00:00, 7.70e-02  
22-Sep-2018 12:00:00, 7.70e-02  
22-Sep-2018 13:00:00, 7.70e-02  
22-Sep-2018 14:00:00, 7.70e-02  
22-Sep-2018 15:00:00, 7.70e-02  
22-Sep-2018 16:00:00, 7.70e-02  
22-Sep-2018 17:00:00, 7.70e-02  
22-Sep-2018 18:00:00, 7.70e-02  
22-Sep-2018 19:00:00, 7.70e-02  
22-Sep-2018 20:00:00, 7.70e-02  
22-Sep-2018 21:00:00, 7.70e-02  
22-Sep-2018 22:00:00, 7.70e-02  
22-Sep-2018 23:00:00, 7.70e-02  
23-Sep-2018, 7.70e-02  
23-Sep-2018 01:00:00, 7.70e-02  
23-Sep-2018 02:00:00, 7.70e-02  
23-Sep-2018 03:00:00, 7.70e-02  
23-Sep-2018 04:00:00, 7.70e-02  
23-Sep-2018 05:00:00, 7.70e-02  
23-Sep-2018 06:00:00, 7.70e-02  
23-Sep-2018 07:00:00, 7.70e-02

23-Sep-2018 08:00:00, 7.70e-02  
23-Sep-2018 09:00:00, 7.70e-02  
23-Sep-2018 10:00:00, 7.70e-02  
23-Sep-2018 11:00:00, 7.70e-02  
23-Sep-2018 12:00:00, 7.70e-02  
23-Sep-2018 13:00:00, 7.70e-02  
23-Sep-2018 14:00:00, 7.70e-02  
23-Sep-2018 15:00:00, 7.70e-02  
23-Sep-2018 16:00:00, 7.70e-02  
23-Sep-2018 17:00:00, 7.70e-02  
23-Sep-2018 18:00:00, 7.70e-02  
23-Sep-2018 19:00:00, 7.70e-02  
23-Sep-2018 20:00:00, 7.70e-02  
23-Sep-2018 21:00:00, 7.70e-02  
23-Sep-2018 22:00:00, 7.70e-02  
23-Sep-2018 23:00:00, 7.70e-02  
24-Sep-2018, 7.70e-02  
24-Sep-2018 01:00:00, 7.70e-02  
24-Sep-2018 02:00:00, 7.70e-02  
24-Sep-2018 03:00:00, 7.70e-02  
24-Sep-2018 04:00:00, 7.70e-02  
24-Sep-2018 05:00:00, 7.70e-02  
24-Sep-2018 06:00:00, 7.70e-02  
24-Sep-2018 07:00:00, 7.70e-02  
24-Sep-2018 08:00:00, 7.70e-02  
24-Sep-2018 09:00:00, 7.70e-02  
24-Sep-2018 10:00:00, 7.70e-02  
24-Sep-2018 11:00:00, 7.90e-02  
24-Sep-2018 12:00:00, 7.70e-02  
24-Sep-2018 13:00:00, 7.80e-02  
24-Sep-2018 14:00:00, 8.00e-02  
24-Sep-2018 15:00:00, 7.70e-02  
24-Sep-2018 16:00:00, 7.70e-02  
24-Sep-2018 17:00:00, 7.70e-02  
24-Sep-2018 18:00:00, 7.70e-02  
24-Sep-2018 19:00:00, 7.70e-02  
24-Sep-2018 20:00:00, 7.70e-02  
24-Sep-2018 21:00:00, 7.70e-02  
24-Sep-2018 22:00:00, 7.70e-02  
24-Sep-2018 23:00:00, 7.70e-02  
25-Sep-2018, 7.70e-02  
25-Sep-2018 01:00:00, 7.70e-02  
25-Sep-2018 02:00:00, 7.70e-02  
25-Sep-2018 03:00:00, 7.70e-02  
25-Sep-2018 04:00:00, 7.70e-02  
25-Sep-2018 05:00:00, 7.70e-02  
25-Sep-2018 06:00:00, 7.60e-02  
25-Sep-2018 07:00:00, 7.60e-02  
25-Sep-2018 08:00:00, 7.60e-02  
25-Sep-2018 09:00:00, 7.70e-02  
25-Sep-2018 10:00:00, 7.70e-02  
25-Sep-2018 11:00:00, 7.70e-02  
25-Sep-2018 12:00:00, 7.70e-02  
25-Sep-2018 13:00:00, 7.70e-02  
25-Sep-2018 14:00:00, 7.70e-02  
25-Sep-2018 15:00:00, 7.70e-02  
25-Sep-2018 16:00:00, 7.70e-02  
25-Sep-2018 17:00:00, 7.70e-02  
25-Sep-2018 18:00:00, 7.70e-02  
25-Sep-2018 19:00:00, 7.70e-02  
25-Sep-2018 20:00:00, 7.70e-02  
25-Sep-2018 21:00:00, 7.70e-02  
25-Sep-2018 22:00:00, 7.70e-02  
25-Sep-2018 23:00:00, 7.70e-02



26-Sep-2018, 7.70e-02  
26-Sep-2018 01:00:00, 7.70e-02  
26-Sep-2018 02:00:00, 7.70e-02  
26-Sep-2018 03:00:00, 7.70e-02  
26-Sep-2018 04:00:00, 7.70e-02  
26-Sep-2018 05:00:00, 7.70e-02  
26-Sep-2018 06:00:00, 7.70e-02  
26-Sep-2018 07:00:00, 7.70e-02  
26-Sep-2018 08:00:00, 7.70e-02  
26-Sep-2018 09:00:00, 7.70e-02  
26-Sep-2018 10:00:00, 7.70e-02  
26-Sep-2018 11:00:00, 7.70e-02  
26-Sep-2018 12:00:00, 7.70e-02  
26-Sep-2018 13:00:00, 7.70e-02  
26-Sep-2018 14:00:00, 7.60e-02  
26-Sep-2018 15:00:00, 7.60e-02  
26-Sep-2018 16:00:00, 7.60e-02  
26-Sep-2018 17:00:00, 7.60e-02  
26-Sep-2018 18:00:00, 7.60e-02  
26-Sep-2018 19:00:00, 7.60e-02  
26-Sep-2018 20:00:00, 7.60e-02  
26-Sep-2018 21:00:00, 7.60e-02  
26-Sep-2018 22:00:00, 7.60e-02  
26-Sep-2018 23:00:00, 7.60e-02  
27-Sep-2018, 7.60e-02  
27-Sep-2018 01:00:00, 7.60e-02  
27-Sep-2018 02:00:00, 7.60e-02  
27-Sep-2018 03:00:00, 7.60e-02  
27-Sep-2018 04:00:00, 7.60e-02  
27-Sep-2018 05:00:00, 7.60e-02  
27-Sep-2018 06:00:00, 7.60e-02  
27-Sep-2018 07:00:00, 7.60e-02  
27-Sep-2018 08:00:00, 7.60e-02  
27-Sep-2018 09:00:00, 7.60e-02  
27-Sep-2018 10:00:00, 7.60e-02  
27-Sep-2018 11:00:00, 7.60e-02  
27-Sep-2018 12:00:00, 7.60e-02  
27-Sep-2018 13:00:00, 7.60e-02  
27-Sep-2018 14:00:00, 7.60e-02  
27-Sep-2018 15:00:00, 7.60e-02  
27-Sep-2018 16:00:00, 7.60e-02  
27-Sep-2018 17:00:00, 7.60e-02  
27-Sep-2018 18:00:00, 7.60e-02  
27-Sep-2018 19:00:00, 7.50e-02  
27-Sep-2018 20:00:00, 7.50e-02  
27-Sep-2018 21:00:00, 7.50e-02  
27-Sep-2018 22:00:00, 7.50e-02  
27-Sep-2018 23:00:00, 7.50e-02  
28-Sep-2018, 7.50e-02  
28-Sep-2018 01:00:00, 7.50e-02  
28-Sep-2018 02:00:00, 7.50e-02  
28-Sep-2018 03:00:00, 7.50e-02  
28-Sep-2018 04:00:00, 7.50e-02  
28-Sep-2018 05:00:00, 7.50e-02  
28-Sep-2018 06:00:00, 7.50e-02  
28-Sep-2018 07:00:00, 7.50e-02  
28-Sep-2018 08:00:00, 7.50e-02  
28-Sep-2018 09:00:00, 7.50e-02  
28-Sep-2018 10:00:00, 7.50e-02  
28-Sep-2018 11:00:00, 7.50e-02  
28-Sep-2018 12:00:00, 7.50e-02  
28-Sep-2018 13:00:00, 7.50e-02  
28-Sep-2018 14:00:00, 7.50e-02  
28-Sep-2018 15:00:00, 7.50e-02

28-Sep-2018 16:00:00, 7.50e-02  
28-Sep-2018 17:00:00, 7.50e-02  
28-Sep-2018 18:00:00, 7.50e-02  
28-Sep-2018 19:00:00, 7.50e-02  
28-Sep-2018 20:00:00, 7.50e-02  
28-Sep-2018 21:00:00, 7.50e-02  
28-Sep-2018 22:00:00, 7.50e-02  
28-Sep-2018 23:00:00, 7.50e-02  
29-Sep-2018, 7.50e-02  
29-Sep-2018 01:00:00, 7.50e-02  
29-Sep-2018 02:00:00, 7.50e-02  
29-Sep-2018 03:00:00, 7.50e-02  
29-Sep-2018 04:00:00, 7.50e-02  
29-Sep-2018 05:00:00, 7.50e-02  
29-Sep-2018 06:00:00, 7.50e-02  
29-Sep-2018 07:00:00, 7.50e-02  
29-Sep-2018 08:00:00, 7.50e-02  
29-Sep-2018 09:00:00, 7.50e-02  
29-Sep-2018 10:00:00, 7.50e-02  
29-Sep-2018 11:00:00, 7.50e-02  
29-Sep-2018 12:00:00, 7.50e-02  
29-Sep-2018 13:00:00, 7.50e-02  
29-Sep-2018 14:00:00, 7.50e-02  
29-Sep-2018 15:00:00, 7.50e-02  
29-Sep-2018 16:00:00, 7.50e-02  
29-Sep-2018 17:00:00, 7.50e-02  
29-Sep-2018 18:00:00, 7.50e-02  
29-Sep-2018 19:00:00, 7.50e-02  
29-Sep-2018 20:00:00, 7.50e-02  
29-Sep-2018 21:00:00, 7.50e-02  
29-Sep-2018 22:00:00, 7.50e-02  
29-Sep-2018 23:00:00, 7.50e-02  
30-Sep-2018, 7.50e-02  
30-Sep-2018 01:00:00, 7.50e-02  
30-Sep-2018 02:00:00, 7.50e-02  
30-Sep-2018 03:00:00, 7.50e-02  
30-Sep-2018 04:00:00, 7.50e-02  
30-Sep-2018 05:00:00, 7.50e-02  
30-Sep-2018 06:00:00, 7.50e-02  
30-Sep-2018 07:00:00, 7.50e-02  
30-Sep-2018 08:00:00, 7.50e-02  
30-Sep-2018 09:00:00, 7.50e-02  
30-Sep-2018 10:00:00, 7.50e-02  
30-Sep-2018 11:00:00, 7.50e-02  
30-Sep-2018 12:00:00, 7.50e-02  
30-Sep-2018 13:00:00, 7.50e-02  
30-Sep-2018 14:00:00, 7.50e-02  
30-Sep-2018 15:00:00, 7.50e-02  
30-Sep-2018 16:00:00, 7.50e-02  
30-Sep-2018 17:00:00, 7.50e-02  
30-Sep-2018 18:00:00, 7.50e-02  
30-Sep-2018 19:00:00, 7.50e-02  
30-Sep-2018 20:00:00, 7.50e-02  
30-Sep-2018 21:00:00, 7.50e-02  
30-Sep-2018 22:00:00, 7.50e-02  
30-Sep-2018 23:00:00, 7.50e-02  
01-Oct-2018, 7.50e-02  
01-Oct-2018 01:00:00, 7.50e-02  
01-Oct-2018 02:00:00, 7.50e-02  
01-Oct-2018 03:00:00, 7.50e-02  
01-Oct-2018 04:00:00, 7.50e-02  
01-Oct-2018 05:00:00, 7.50e-02  
01-Oct-2018 06:00:00, 7.50e-02  
01-Oct-2018 07:00:00, 7.50e-02

01-Oct-2018 08:00:00, 7.50e-02  
01-Oct-2018 09:00:00, 7.50e-02  
01-Oct-2018 10:00:00, 7.50e-02  
01-Oct-2018 11:00:00, 7.50e-02  
01-Oct-2018 12:00:00, 7.50e-02  
01-Oct-2018 13:00:00, 7.60e-02  
01-Oct-2018 14:00:00, 7.90e-02  
01-Oct-2018 15:00:00, 7.80e-02  
01-Oct-2018 16:00:00, 7.60e-02  
01-Oct-2018 17:00:00, 7.50e-02  
01-Oct-2018 18:00:00, 7.50e-02  
01-Oct-2018 19:00:00, 7.50e-02  
01-Oct-2018 20:00:00, 7.50e-02  
01-Oct-2018 21:00:00, 7.50e-02  
01-Oct-2018 22:00:00, 7.50e-02  
01-Oct-2018 23:00:00, 7.50e-02  
02-Oct-2018, 7.50e-02  
02-Oct-2018 01:00:00, 7.50e-02  
02-Oct-2018 02:00:00, 7.50e-02  
02-Oct-2018 03:00:00, 7.50e-02  
02-Oct-2018 04:00:00, 7.50e-02  
02-Oct-2018 05:00:00, 7.50e-02  
02-Oct-2018 06:00:00, 7.50e-02  
02-Oct-2018 07:00:00, 7.50e-02  
02-Oct-2018 08:00:00, 7.60e-02  
02-Oct-2018 09:00:00, 7.80e-02  
02-Oct-2018 10:00:00, 7.90e-02  
02-Oct-2018 11:00:00, 7.90e-02  
02-Oct-2018 12:00:00, 7.90e-02  
02-Oct-2018 13:00:00, 7.90e-02  
02-Oct-2018 14:00:00, 7.90e-02  
02-Oct-2018 15:00:00, 7.90e-02  
02-Oct-2018 16:00:00, 7.90e-02  
02-Oct-2018 17:00:00, 7.80e-02  
02-Oct-2018 18:00:00, 7.70e-02  
02-Oct-2018 19:00:00, 7.70e-02  
02-Oct-2018 20:00:00, 7.70e-02  
02-Oct-2018 21:00:00, 7.70e-02  
02-Oct-2018 22:00:00, 7.70e-02  
02-Oct-2018 23:00:00, 7.70e-02  
03-Oct-2018, 7.80e-02  
03-Oct-2018 01:00:00, 7.90e-02  
03-Oct-2018 02:00:00, 7.90e-02  
03-Oct-2018 03:00:00, 7.90e-02  
03-Oct-2018 04:00:00, 7.90e-02  
03-Oct-2018 05:00:00, 7.80e-02  
03-Oct-2018 06:00:00, 7.80e-02  
03-Oct-2018 07:00:00, 7.80e-02  
03-Oct-2018 08:00:00, 7.80e-02  
03-Oct-2018 09:00:00, 7.80e-02  
03-Oct-2018 10:00:00, 7.80e-02  
03-Oct-2018 11:00:00, 7.60e-02  
03-Oct-2018 12:00:00, 7.50e-02  
03-Oct-2018 13:00:00, 7.50e-02  
03-Oct-2018 14:00:00, 7.50e-02  
03-Oct-2018 15:00:00, 7.50e-02  
03-Oct-2018 16:00:00, 7.50e-02  
03-Oct-2018 17:00:00, 7.50e-02  
03-Oct-2018 18:00:00, 7.50e-02  
03-Oct-2018 19:00:00, 7.50e-02  
03-Oct-2018 20:00:00, 7.50e-02  
03-Oct-2018 21:00:00, 7.50e-02  
03-Oct-2018 22:00:00, 7.50e-02  
03-Oct-2018 23:00:00, 7.50e-02

04-Oct-2018, 7.50e-02  
04-Oct-2018 01:00:00, 7.50e-02  
04-Oct-2018 02:00:00, 7.50e-02  
04-Oct-2018 03:00:00, 7.50e-02  
04-Oct-2018 04:00:00, 7.50e-02  
04-Oct-2018 05:00:00, 7.50e-02  
04-Oct-2018 06:00:00, 7.50e-02  
04-Oct-2018 07:00:00, 7.50e-02  
04-Oct-2018 08:00:00, 7.50e-02  
04-Oct-2018 09:00:00, 7.50e-02  
04-Oct-2018 10:00:00, 7.50e-02  
04-Oct-2018 11:00:00, 7.50e-02  
04-Oct-2018 12:00:00, 7.80e-02  
04-Oct-2018 13:00:00, 7.70e-02  
04-Oct-2018 14:00:00, 7.80e-02  
04-Oct-2018 15:00:00, 7.60e-02  
04-Oct-2018 16:00:00, 7.50e-02  
04-Oct-2018 17:00:00, 7.50e-02  
04-Oct-2018 18:00:00, 7.50e-02  
04-Oct-2018 19:00:00, 7.50e-02  
04-Oct-2018 20:00:00, 7.50e-02  
04-Oct-2018 21:00:00, 7.50e-02  
04-Oct-2018 22:00:00, 7.50e-02  
04-Oct-2018 23:00:00, 7.50e-02  
05-Oct-2018, 7.50e-02  
05-Oct-2018 01:00:00, 7.50e-02  
05-Oct-2018 02:00:00, 7.50e-02  
05-Oct-2018 03:00:00, 7.50e-02  
05-Oct-2018 04:00:00, 7.50e-02  
05-Oct-2018 05:00:00, 7.50e-02  
05-Oct-2018 06:00:00, 7.50e-02  
05-Oct-2018 07:00:00, 7.50e-02  
05-Oct-2018 08:00:00, 7.50e-02  
05-Oct-2018 09:00:00, 7.50e-02  
05-Oct-2018 10:00:00, 7.50e-02  
05-Oct-2018 11:00:00, 7.50e-02  
05-Oct-2018 12:00:00, 7.50e-02  
05-Oct-2018 13:00:00, 7.80e-02  
05-Oct-2018 14:00:00, 7.70e-02  
05-Oct-2018 15:00:00, 7.60e-02  
05-Oct-2018 16:00:00, 7.50e-02  
05-Oct-2018 17:00:00, 7.50e-02  
05-Oct-2018 18:00:00, 7.60e-02  
05-Oct-2018 19:00:00, 7.50e-02  
05-Oct-2018 20:00:00, 7.50e-02  
05-Oct-2018 21:00:00, 7.70e-02  
05-Oct-2018 22:00:00, 7.80e-02  
05-Oct-2018 23:00:00, 7.70e-02  
06-Oct-2018, 7.70e-02  
06-Oct-2018 01:00:00, 7.70e-02  
06-Oct-2018 02:00:00, 7.70e-02  
06-Oct-2018 03:00:00, 7.70e-02  
06-Oct-2018 04:00:00, 7.70e-02  
06-Oct-2018 05:00:00, 7.70e-02  
06-Oct-2018 06:00:00, 7.70e-02  
06-Oct-2018 07:00:00, 7.70e-02  
06-Oct-2018 08:00:00, 7.70e-02  
06-Oct-2018 09:00:00, 7.70e-02  
06-Oct-2018 10:00:00, 7.70e-02  
06-Oct-2018 11:00:00, 7.60e-02  
06-Oct-2018 12:00:00, 7.50e-02  
06-Oct-2018 13:00:00, 7.50e-02  
06-Oct-2018 14:00:00, 7.50e-02  
06-Oct-2018 15:00:00, 7.50e-02

06-Oct-2018 16:00:00, 7.60e-02  
06-Oct-2018 17:00:00, 7.60e-02  
06-Oct-2018 18:00:00, 7.50e-02  
06-Oct-2018 19:00:00, 7.50e-02  
06-Oct-2018 20:00:00, 7.50e-02  
06-Oct-2018 21:00:00, 7.50e-02  
06-Oct-2018 22:00:00, 7.50e-02  
06-Oct-2018 23:00:00, 7.50e-02  
07-Oct-2018, 7.50e-02  
07-Oct-2018 01:00:00, 7.50e-02  
07-Oct-2018 02:00:00, 7.50e-02  
07-Oct-2018 03:00:00, 7.40e-02  
07-Oct-2018 04:00:00, 7.50e-02  
07-Oct-2018 05:00:00, 7.50e-02  
07-Oct-2018 06:00:00, 7.50e-02  
07-Oct-2018 07:00:00, 7.50e-02  
07-Oct-2018 08:00:00, 7.50e-02  
07-Oct-2018 09:00:00, 7.50e-02  
07-Oct-2018 10:00:00, 7.50e-02  
07-Oct-2018 11:00:00, 7.40e-02  
07-Oct-2018 12:00:00, 7.50e-02  
07-Oct-2018 13:00:00, 7.50e-02  
07-Oct-2018 14:00:00, 7.50e-02  
07-Oct-2018 15:00:00, 7.50e-02  
07-Oct-2018 16:00:00, 7.50e-02  
07-Oct-2018 17:00:00, 7.50e-02  
07-Oct-2018 18:00:00, 7.40e-02  
07-Oct-2018 19:00:00, 7.40e-02  
07-Oct-2018 20:00:00, 7.40e-02  
07-Oct-2018 21:00:00, 7.40e-02  
07-Oct-2018 22:00:00, 7.60e-02  
07-Oct-2018 23:00:00, 7.80e-02  
08-Oct-2018, 7.80e-02  
08-Oct-2018 01:00:00, 7.70e-02  
08-Oct-2018 02:00:00, 7.70e-02  
08-Oct-2018 03:00:00, 7.70e-02  
08-Oct-2018 04:00:00, 7.70e-02  
08-Oct-2018 05:00:00, 7.70e-02  
08-Oct-2018 06:00:00, 7.70e-02  
08-Oct-2018 07:00:00, 7.70e-02  
08-Oct-2018 08:00:00, 7.70e-02  
08-Oct-2018 09:00:00, 7.70e-02  
08-Oct-2018 10:00:00, 7.50e-02  
08-Oct-2018 11:00:00, 7.70e-02  
08-Oct-2018 12:00:00, 7.70e-02  
08-Oct-2018 13:00:00, 7.70e-02  
08-Oct-2018 14:00:00, 7.70e-02  
08-Oct-2018 15:00:00, 7.60e-02  
08-Oct-2018 16:00:00, 7.50e-02  
08-Oct-2018 17:00:00, 7.50e-02  
08-Oct-2018 18:00:00, 7.50e-02  
08-Oct-2018 19:00:00, 7.50e-02  
08-Oct-2018 20:00:00, 7.40e-02  
08-Oct-2018 21:00:00, 7.40e-02  
08-Oct-2018 22:00:00, 7.40e-02  
08-Oct-2018 23:00:00, 7.40e-02  
09-Oct-2018, 7.40e-02  
09-Oct-2018 01:00:00, 7.40e-02  
09-Oct-2018 02:00:00, 7.40e-02  
09-Oct-2018 03:00:00, 7.40e-02  
09-Oct-2018 04:00:00, 7.40e-02  
09-Oct-2018 05:00:00, 7.40e-02  
09-Oct-2018 06:00:00, 7.40e-02  
09-Oct-2018 07:00:00, 7.40e-02

09-Oct-2018 08:00:00, 7.40e-02  
09-Oct-2018 09:00:00, 7.40e-02  
09-Oct-2018 10:00:00, 7.40e-02  
09-Oct-2018 11:00:00, 7.40e-02  
09-Oct-2018 12:00:00, 7.40e-02  
09-Oct-2018 13:00:00, 7.40e-02  
09-Oct-2018 14:00:00, 7.40e-02  
09-Oct-2018 15:00:00, 7.40e-02  
09-Oct-2018 16:00:00, 7.40e-02  
09-Oct-2018 17:00:00, 7.40e-02  
09-Oct-2018 18:00:00, 7.40e-02  
09-Oct-2018 19:00:00, 7.40e-02  
09-Oct-2018 20:00:00, 7.40e-02  
09-Oct-2018 21:00:00, 7.40e-02  
09-Oct-2018 22:00:00, 7.40e-02  
09-Oct-2018 23:00:00, 7.40e-02  
10-Oct-2018, 7.40e-02  
10-Oct-2018 01:00:00, 7.40e-02  
10-Oct-2018 02:00:00, 7.40e-02  
10-Oct-2018 03:00:00, 7.40e-02  
10-Oct-2018 04:00:00, 7.40e-02  
10-Oct-2018 05:00:00, 7.40e-02  
10-Oct-2018 06:00:00, 7.40e-02  
10-Oct-2018 07:00:00, 7.40e-02  
10-Oct-2018 08:00:00, 7.40e-02  
10-Oct-2018 09:00:00, 7.50e-02  
10-Oct-2018 10:00:00, 7.50e-02  
10-Oct-2018 11:00:00, 7.60e-02  
10-Oct-2018 12:00:00, 7.60e-02  
10-Oct-2018 13:00:00, 7.50e-02  
10-Oct-2018 14:00:00, 7.50e-02  
10-Oct-2018 15:00:00, 7.40e-02  
10-Oct-2018 16:00:00, 7.40e-02  
10-Oct-2018 17:00:00, 7.40e-02  
10-Oct-2018 18:00:00, 7.40e-02  
10-Oct-2018 19:00:00, 7.40e-02  
10-Oct-2018 20:00:00, 7.40e-02  
10-Oct-2018 21:00:00, 7.40e-02  
10-Oct-2018 22:00:00, 7.40e-02  
10-Oct-2018 23:00:00, 7.40e-02  
11-Oct-2018, 7.40e-02  
11-Oct-2018 01:00:00, 7.40e-02  
11-Oct-2018 02:00:00, 7.40e-02  
11-Oct-2018 03:00:00, 7.40e-02  
11-Oct-2018 04:00:00, 7.40e-02  
11-Oct-2018 05:00:00, 7.40e-02  
11-Oct-2018 06:00:00, 7.40e-02  
11-Oct-2018 07:00:00, 7.40e-02  
11-Oct-2018 08:00:00, 7.40e-02  
11-Oct-2018 09:00:00, 7.40e-02  
11-Oct-2018 10:00:00, 7.50e-02  
11-Oct-2018 11:00:00, 7.50e-02  
11-Oct-2018 12:00:00, 7.70e-02  
11-Oct-2018 13:00:00, 7.70e-02  
11-Oct-2018 14:00:00, 7.70e-02  
11-Oct-2018 15:00:00, 7.70e-02  
11-Oct-2018 16:00:00, 7.50e-02  
11-Oct-2018 17:00:00, 7.40e-02  
11-Oct-2018 18:00:00, 7.40e-02  
11-Oct-2018 19:00:00, 7.40e-02  
11-Oct-2018 20:00:00, 7.40e-02  
11-Oct-2018 21:00:00, 7.40e-02  
11-Oct-2018 22:00:00, 7.40e-02  
11-Oct-2018 23:00:00, 7.40e-02

12-Oct-2018, 7.40e-02  
12-Oct-2018 01:00:00, 7.30e-02  
12-Oct-2018 02:00:00, 7.40e-02  
12-Oct-2018 03:00:00, 7.40e-02  
12-Oct-2018 04:00:00, 7.40e-02  
12-Oct-2018 05:00:00, 7.40e-02  
12-Oct-2018 06:00:00, 7.40e-02  
12-Oct-2018 07:00:00, 7.30e-02  
12-Oct-2018 08:00:00, 7.30e-02  
12-Oct-2018 09:00:00, 7.40e-02  
12-Oct-2018 10:00:00, 7.40e-02  
12-Oct-2018 11:00:00, 7.40e-02  
12-Oct-2018 12:00:00, 7.40e-02  
12-Oct-2018 13:00:00, 7.40e-02  
12-Oct-2018 14:00:00, 7.40e-02  
12-Oct-2018 15:00:00, 7.40e-02  
12-Oct-2018 16:00:00, 7.30e-02  
12-Oct-2018 17:00:00, 7.30e-02  
12-Oct-2018 18:00:00, 7.20e-02  
12-Oct-2018 19:00:00, 7.20e-02  
12-Oct-2018 20:00:00, 7.20e-02  
12-Oct-2018 21:00:00, 7.20e-02  
12-Oct-2018 22:00:00, 7.20e-02  
12-Oct-2018 23:00:00, 7.20e-02  
13-Oct-2018, 7.20e-02  
13-Oct-2018 01:00:00, 7.20e-02  
13-Oct-2018 02:00:00, 7.20e-02  
13-Oct-2018 03:00:00, 7.20e-02  
13-Oct-2018 04:00:00, 7.20e-02  
13-Oct-2018 05:00:00, 7.20e-02  
13-Oct-2018 06:00:00, 7.20e-02  
13-Oct-2018 07:00:00, 7.20e-02  
13-Oct-2018 08:00:00, 7.20e-02  
13-Oct-2018 09:00:00, 7.20e-02  
13-Oct-2018 10:00:00, 7.20e-02  
13-Oct-2018 11:00:00, 7.20e-02  
13-Oct-2018 12:00:00, 7.20e-02  
13-Oct-2018 13:00:00, 7.20e-02  
13-Oct-2018 14:00:00, 7.20e-02  
13-Oct-2018 15:00:00, 7.20e-02  
13-Oct-2018 16:00:00, 7.20e-02  
13-Oct-2018 17:00:00, 7.20e-02  
13-Oct-2018 18:00:00, 7.20e-02  
13-Oct-2018 19:00:00, 7.20e-02  
13-Oct-2018 20:00:00, 7.20e-02  
13-Oct-2018 21:00:00, 7.20e-02  
13-Oct-2018 22:00:00, 7.20e-02  
13-Oct-2018 23:00:00, 7.20e-02  
14-Oct-2018, 7.20e-02  
14-Oct-2018 01:00:00, 7.20e-02  
14-Oct-2018 02:00:00, 7.20e-02  
14-Oct-2018 03:00:00, 7.20e-02  
14-Oct-2018 04:00:00, 7.20e-02  
14-Oct-2018 05:00:00, 7.20e-02  
14-Oct-2018 06:00:00, 7.20e-02  
14-Oct-2018 07:00:00, 7.20e-02  
14-Oct-2018 08:00:00, 7.20e-02  
14-Oct-2018 09:00:00, 7.20e-02  
14-Oct-2018 10:00:00, 7.20e-02  
14-Oct-2018 11:00:00, 7.30e-02  
14-Oct-2018 12:00:00, 7.20e-02  
14-Oct-2018 13:00:00, 7.20e-02  
14-Oct-2018 14:00:00, 7.20e-02  
14-Oct-2018 15:00:00, 7.20e-02

14-Oct-2018 16:00:00, 7.20e-02  
14-Oct-2018 17:00:00, 7.20e-02  
14-Oct-2018 18:00:00, 7.20e-02  
14-Oct-2018 19:00:00, 7.20e-02  
14-Oct-2018 20:00:00, 7.10e-02  
14-Oct-2018 21:00:00, 7.10e-02  
14-Oct-2018 22:00:00, 7.10e-02  
14-Oct-2018 23:00:00, 7.10e-02  
15-Oct-2018, 7.10e-02  
15-Oct-2018 01:00:00, 7.10e-02  
15-Oct-2018 02:00:00, 7.10e-02  
15-Oct-2018 03:00:00, 7.10e-02  
15-Oct-2018 04:00:00, 7.10e-02  
15-Oct-2018 05:00:00, 7.10e-02  
15-Oct-2018 06:00:00, 7.00e-02  
15-Oct-2018 07:00:00, 7.00e-02  
15-Oct-2018 08:00:00, 7.00e-02  
15-Oct-2018 09:00:00, 7.00e-02  
15-Oct-2018 10:00:00, 7.10e-02  
15-Oct-2018 11:00:00, 7.20e-02  
15-Oct-2018 12:00:00, 7.20e-02  
15-Oct-2018 13:00:00, 7.20e-02  
15-Oct-2018 14:00:00, 7.10e-02  
15-Oct-2018 15:00:00, 7.10e-02  
15-Oct-2018 16:00:00, 7.10e-02  
15-Oct-2018 17:00:00, 7.10e-02  
15-Oct-2018 18:00:00, 7.00e-02  
15-Oct-2018 19:00:00, 7.00e-02  
15-Oct-2018 20:00:00, 7.00e-02  
15-Oct-2018 21:00:00, 7.00e-02  
15-Oct-2018 22:00:00, 7.00e-02  
15-Oct-2018 23:00:00, 7.00e-02  
16-Oct-2018, 7.00e-02  
16-Oct-2018 01:00:00, 7.00e-02  
16-Oct-2018 02:00:00, 7.00e-02  
16-Oct-2018 03:00:00, 7.00e-02  
16-Oct-2018 04:00:00, 7.00e-02  
16-Oct-2018 05:00:00, 7.00e-02  
16-Oct-2018 06:00:00, 7.00e-02  
16-Oct-2018 07:00:00, 7.00e-02  
16-Oct-2018 08:00:00, 7.00e-02  
16-Oct-2018 09:00:00, 7.00e-02  
16-Oct-2018 10:00:00, 7.00e-02  
16-Oct-2018 11:00:00, 7.00e-02  
16-Oct-2018 12:00:00, 7.10e-02  
16-Oct-2018 13:00:00, 7.10e-02  
16-Oct-2018 14:00:00, 7.10e-02  
16-Oct-2018 15:00:00, 7.00e-02  
16-Oct-2018 16:00:00, 7.00e-02  
16-Oct-2018 17:00:00, 7.00e-02  
16-Oct-2018 18:00:00, 7.00e-02  
16-Oct-2018 19:00:00, 7.00e-02  
16-Oct-2018 20:00:00, 7.00e-02  
16-Oct-2018 21:00:00, 7.00e-02  
16-Oct-2018 22:00:00, 7.00e-02  
16-Oct-2018 23:00:00, 7.00e-02  
17-Oct-2018, 7.00e-02  
17-Oct-2018 01:00:00, 7.00e-02  
17-Oct-2018 02:00:00, 7.00e-02  
17-Oct-2018 03:00:00, 7.00e-02  
17-Oct-2018 04:00:00, 7.00e-02  
17-Oct-2018 05:00:00, 7.00e-02  
17-Oct-2018 06:00:00, 7.00e-02  
17-Oct-2018 07:00:00, 7.00e-02



17-Oct-2018 08:00:00, 7.00e-02  
17-Oct-2018 09:00:00, 7.00e-02  
17-Oct-2018 10:00:00, 7.00e-02  
17-Oct-2018 11:00:00, 7.00e-02  
17-Oct-2018 12:00:00, 7.00e-02  
17-Oct-2018 13:00:00, 7.00e-02  
17-Oct-2018 14:00:00, 7.00e-02  
17-Oct-2018 15:00:00, 7.00e-02  
17-Oct-2018 16:00:00, 7.00e-02  
17-Oct-2018 17:00:00, 7.00e-02  
17-Oct-2018 18:00:00, 7.00e-02  
17-Oct-2018 19:00:00, 7.00e-02  
17-Oct-2018 20:00:00, 7.00e-02  
17-Oct-2018 21:00:00, 7.00e-02  
17-Oct-2018 22:00:00, 7.00e-02  
17-Oct-2018 23:00:00, 7.00e-02  
18-Oct-2018, 7.00e-02  
18-Oct-2018 01:00:00, 7.00e-02  
18-Oct-2018 02:00:00, 7.00e-02  
18-Oct-2018 03:00:00, 7.00e-02  
18-Oct-2018 04:00:00, 7.00e-02  
18-Oct-2018 05:00:00, 7.00e-02  
18-Oct-2018 06:00:00, 7.00e-02  
18-Oct-2018 07:00:00, 7.00e-02  
18-Oct-2018 08:00:00, 7.00e-02  
18-Oct-2018 09:00:00, 7.00e-02  
18-Oct-2018 10:00:00, 7.00e-02  
18-Oct-2018 11:00:00, 7.00e-02  
18-Oct-2018 12:00:00, 7.00e-02  
18-Oct-2018 13:00:00, 7.00e-02  
18-Oct-2018 14:00:00, 7.00e-02  
18-Oct-2018 15:00:00, 7.00e-02  
18-Oct-2018 16:00:00, 7.00e-02  
18-Oct-2018 17:00:00, 7.00e-02  
18-Oct-2018 18:00:00, 7.00e-02  
18-Oct-2018 19:00:00, 7.00e-02  
18-Oct-2018 20:00:00, 7.00e-02  
18-Oct-2018 21:00:00, 7.00e-02  
18-Oct-2018 22:00:00, 7.00e-02  
18-Oct-2018 23:00:00, 7.00e-02  
19-Oct-2018, 7.00e-02  
19-Oct-2018 01:00:00, 7.00e-02  
19-Oct-2018 02:00:00, 7.00e-02  
19-Oct-2018 03:00:00, 7.00e-02  
19-Oct-2018 04:00:00, 7.00e-02  
19-Oct-2018 05:00:00, 7.00e-02  
19-Oct-2018 06:00:00, 7.00e-02  
19-Oct-2018 07:00:00, 7.00e-02  
19-Oct-2018 08:00:00, 7.00e-02  
19-Oct-2018 09:00:00, 7.00e-02  
19-Oct-2018 10:00:00, 7.00e-02  
19-Oct-2018 11:00:00, 7.00e-02  
19-Oct-2018 12:00:00, 7.00e-02  
19-Oct-2018 13:00:00, 7.00e-02  
19-Oct-2018 14:00:00, 7.00e-02  
19-Oct-2018 15:00:00, 7.00e-02  
19-Oct-2018 16:00:00, 7.00e-02  
19-Oct-2018 17:00:00, 7.00e-02  
19-Oct-2018 18:00:00, 7.00e-02  
19-Oct-2018 19:00:00, 7.00e-02  
19-Oct-2018 20:00:00, 7.00e-02  
19-Oct-2018 21:00:00, 7.00e-02  
19-Oct-2018 22:00:00, 7.00e-02  
19-Oct-2018 23:00:00, 7.00e-02

20-Oct-2018, 7.00e-02  
20-Oct-2018 01:00:00, 7.00e-02  
20-Oct-2018 02:00:00, 7.00e-02  
20-Oct-2018 03:00:00, 7.00e-02  
20-Oct-2018 04:00:00, 7.00e-02  
20-Oct-2018 05:00:00, 7.00e-02  
20-Oct-2018 06:00:00, 7.00e-02  
20-Oct-2018 07:00:00, 7.00e-02  
20-Oct-2018 08:00:00, 7.00e-02  
20-Oct-2018 09:00:00, 7.00e-02  
20-Oct-2018 10:00:00, 7.00e-02  
20-Oct-2018 11:00:00, 7.00e-02  
20-Oct-2018 12:00:00, 7.00e-02  
20-Oct-2018 13:00:00, 7.00e-02  
20-Oct-2018 14:00:00, 7.00e-02  
20-Oct-2018 15:00:00, 7.00e-02  
20-Oct-2018 16:00:00, 7.10e-02  
20-Oct-2018 17:00:00, 7.10e-02  
20-Oct-2018 18:00:00, 7.00e-02  
20-Oct-2018 19:00:00, 7.00e-02  
20-Oct-2018 20:00:00, 7.00e-02  
20-Oct-2018 21:00:00, 7.00e-02  
20-Oct-2018 22:00:00, 7.00e-02  
20-Oct-2018 23:00:00, 7.00e-02  
21-Oct-2018, 7.00e-02  
21-Oct-2018 01:00:00, 7.00e-02  
21-Oct-2018 02:00:00, 7.00e-02  
21-Oct-2018 03:00:00, 7.00e-02  
21-Oct-2018 04:00:00, 7.00e-02  
21-Oct-2018 05:00:00, 7.00e-02  
21-Oct-2018 06:00:00, 7.00e-02  
21-Oct-2018 07:00:00, 7.00e-02  
21-Oct-2018 08:00:00, 7.00e-02  
21-Oct-2018 09:00:00, 7.00e-02  
21-Oct-2018 10:00:00, 7.00e-02  
21-Oct-2018 11:00:00, 7.00e-02  
21-Oct-2018 12:00:00, 7.10e-02  
21-Oct-2018 13:00:00, 7.10e-02  
21-Oct-2018 14:00:00, 7.20e-02  
21-Oct-2018 15:00:00, 7.20e-02  
21-Oct-2018 16:00:00, 7.20e-02  
21-Oct-2018 17:00:00, 7.20e-02  
21-Oct-2018 18:00:00, 7.20e-02  
21-Oct-2018 19:00:00, 7.20e-02  
21-Oct-2018 20:00:00, 7.20e-02  
21-Oct-2018 21:00:00, 7.20e-02  
21-Oct-2018 22:00:00, 7.20e-02  
21-Oct-2018 23:00:00, 7.20e-02  
22-Oct-2018, 7.20e-02  
22-Oct-2018 01:00:00, 7.10e-02  
22-Oct-2018 02:00:00, 7.10e-02  
22-Oct-2018 03:00:00, 7.10e-02  
22-Oct-2018 04:00:00, 7.10e-02  
22-Oct-2018 05:00:00, 7.10e-02  
22-Oct-2018 06:00:00, 7.10e-02  
22-Oct-2018 07:00:00, 7.10e-02  
22-Oct-2018 08:00:00, 7.10e-02  
22-Oct-2018 09:00:00, 7.10e-02  
22-Oct-2018 10:00:00, 7.10e-02  
22-Oct-2018 11:00:00, 7.20e-02  
22-Oct-2018 12:00:00, 7.20e-02  
22-Oct-2018 13:00:00, 7.20e-02  
22-Oct-2018 14:00:00, 7.20e-02  
22-Oct-2018 15:00:00, 7.20e-02

22-Oct-2018 16:00:00, 7.20e-02  
22-Oct-2018 17:00:00, 7.20e-02  
22-Oct-2018 18:00:00, 7.20e-02  
22-Oct-2018 19:00:00, 7.20e-02  
22-Oct-2018 20:00:00, 7.20e-02  
22-Oct-2018 21:00:00, 7.20e-02  
22-Oct-2018 22:00:00, 7.20e-02  
22-Oct-2018 23:00:00, 7.20e-02  
23-Oct-2018, 7.20e-02  
23-Oct-2018 01:00:00, 7.20e-02  
23-Oct-2018 02:00:00, 7.40e-02  
23-Oct-2018 03:00:00, 7.40e-02  
23-Oct-2018 04:00:00, 7.40e-02  
23-Oct-2018 05:00:00, 7.40e-02  
23-Oct-2018 06:00:00, 7.40e-02  
23-Oct-2018 07:00:00, 7.40e-02  
23-Oct-2018 08:00:00, 7.40e-02  
23-Oct-2018 09:00:00, 7.40e-02  
23-Oct-2018 10:00:00, 7.30e-02  
23-Oct-2018 11:00:00, 7.20e-02  
23-Oct-2018 12:00:00, 7.20e-02  
23-Oct-2018 13:00:00, 7.20e-02  
23-Oct-2018 14:00:00, 7.20e-02  
23-Oct-2018 15:00:00, 7.20e-02  
23-Oct-2018 16:00:00, 7.20e-02  
23-Oct-2018 17:00:00, 7.20e-02  
23-Oct-2018 18:00:00, 7.20e-02  
23-Oct-2018 19:00:00, 7.20e-02  
23-Oct-2018 20:00:00, 7.20e-02  
23-Oct-2018 21:00:00, 7.20e-02  
23-Oct-2018 22:00:00, 7.20e-02  
23-Oct-2018 23:00:00, 7.20e-02  
24-Oct-2018, 7.20e-02  
24-Oct-2018 01:00:00, 7.20e-02  
24-Oct-2018 02:00:00, 7.40e-02  
24-Oct-2018 03:00:00, 7.40e-02  
24-Oct-2018 04:00:00, 7.40e-02  
24-Oct-2018 05:00:00, 7.40e-02  
24-Oct-2018 06:00:00, 7.40e-02  
24-Oct-2018 07:00:00, 7.40e-02  
24-Oct-2018 08:00:00, 7.40e-02  
24-Oct-2018 09:00:00, 7.40e-02  
24-Oct-2018 10:00:00, 7.30e-02  
24-Oct-2018 11:00:00, 7.20e-02  
24-Oct-2018 12:00:00, 7.20e-02  
24-Oct-2018 13:00:00, 7.20e-02  
24-Oct-2018 14:00:00, 7.20e-02  
24-Oct-2018 15:00:00, 7.20e-02  
24-Oct-2018 16:00:00, 7.20e-02  
24-Oct-2018 17:00:00, 7.20e-02  
24-Oct-2018 18:00:00, 7.20e-02  
24-Oct-2018 19:00:00, 7.20e-02  
24-Oct-2018 20:00:00, 7.20e-02  
24-Oct-2018 21:00:00, 7.20e-02  
24-Oct-2018 22:00:00, 7.20e-02  
24-Oct-2018 23:00:00, 7.20e-02  
25-Oct-2018, 7.20e-02  
25-Oct-2018 01:00:00, 7.20e-02  
25-Oct-2018 02:00:00, 7.20e-02  
25-Oct-2018 03:00:00, 7.20e-02  
25-Oct-2018 04:00:00, 7.20e-02  
25-Oct-2018 05:00:00, 7.20e-02  
25-Oct-2018 06:00:00, 7.20e-02  
25-Oct-2018 07:00:00, 7.20e-02

25-Oct-2018 08:00:00, 7.20e-02  
25-Oct-2018 09:00:00, 7.20e-02  
25-Oct-2018 10:00:00, 7.20e-02  
25-Oct-2018 11:00:00, 7.20e-02  
25-Oct-2018 12:00:00, 7.20e-02  
25-Oct-2018 13:00:00, 7.20e-02  
25-Oct-2018 14:00:00, 7.20e-02  
25-Oct-2018 15:00:00, 7.20e-02  
25-Oct-2018 16:00:00, 7.20e-02  
25-Oct-2018 17:00:00, 7.20e-02  
25-Oct-2018 18:00:00, 7.20e-02  
25-Oct-2018 19:00:00, 7.20e-02  
25-Oct-2018 20:00:00, 7.20e-02  
25-Oct-2018 21:00:00, 7.20e-02  
25-Oct-2018 22:00:00, 7.20e-02  
25-Oct-2018 23:00:00, 7.20e-02  
26-Oct-2018, 7.20e-02  
26-Oct-2018 01:00:00, 7.20e-02  
26-Oct-2018 02:00:00, 7.20e-02  
26-Oct-2018 03:00:00, 7.20e-02  
26-Oct-2018 04:00:00, 7.20e-02  
26-Oct-2018 05:00:00, 7.20e-02  
26-Oct-2018 06:00:00, 7.20e-02  
26-Oct-2018 07:00:00, 7.20e-02  
26-Oct-2018 08:00:00, 7.20e-02  
26-Oct-2018 09:00:00, 7.20e-02  
26-Oct-2018 10:00:00, 7.20e-02  
26-Oct-2018 11:00:00, 7.20e-02  
26-Oct-2018 12:00:00, 7.20e-02  
26-Oct-2018 13:00:00, 7.20e-02  
26-Oct-2018 14:00:00, 7.20e-02  
26-Oct-2018 15:00:00, 7.20e-02  
26-Oct-2018 16:00:00, 7.20e-02  
26-Oct-2018 17:00:00, 7.20e-02  
26-Oct-2018 18:00:00, 7.20e-02  
26-Oct-2018 19:00:00, 7.20e-02  
26-Oct-2018 20:00:00, 7.20e-02  
26-Oct-2018 21:00:00, 7.20e-02  
26-Oct-2018 22:00:00, 7.20e-02  
26-Oct-2018 23:00:00, 7.20e-02  
27-Oct-2018, 7.20e-02  
27-Oct-2018 01:00:00, 7.20e-02  
27-Oct-2018 02:00:00, 7.20e-02  
27-Oct-2018 03:00:00, 7.20e-02  
27-Oct-2018 04:00:00, 7.20e-02  
27-Oct-2018 05:00:00, 7.20e-02  
27-Oct-2018 06:00:00, 7.20e-02  
27-Oct-2018 07:00:00, 7.20e-02  
27-Oct-2018 08:00:00, 7.20e-02  
27-Oct-2018 09:00:00, 7.20e-02  
27-Oct-2018 10:00:00, 7.20e-02  
27-Oct-2018 11:00:00, 7.20e-02  
27-Oct-2018 12:00:00, 7.20e-02  
27-Oct-2018 13:00:00, 7.20e-02  
27-Oct-2018 14:00:00, 7.20e-02  
27-Oct-2018 15:00:00, 7.20e-02  
27-Oct-2018 16:00:00, 7.20e-02  
27-Oct-2018 17:00:00, 7.20e-02  
27-Oct-2018 18:00:00, 7.20e-02  
27-Oct-2018 19:00:00, 7.20e-02  
27-Oct-2018 20:00:00, 7.20e-02  
27-Oct-2018 21:00:00, 7.20e-02  
27-Oct-2018 22:00:00, 7.20e-02  
27-Oct-2018 23:00:00, 7.20e-02

28-Oct-2018, 7.20e-02  
28-Oct-2018 01:00:00, 7.20e-02  
28-Oct-2018 02:00:00, 7.20e-02  
28-Oct-2018 03:00:00, 7.20e-02  
28-Oct-2018 04:00:00, 7.20e-02  
28-Oct-2018 05:00:00, 7.20e-02  
28-Oct-2018 06:00:00, 7.20e-02  
28-Oct-2018 07:00:00, 7.20e-02  
28-Oct-2018 08:00:00, 7.20e-02  
28-Oct-2018 09:00:00, 7.20e-02  
28-Oct-2018 10:00:00, 7.20e-02  
28-Oct-2018 11:00:00, 7.20e-02  
28-Oct-2018 12:00:00, 7.20e-02  
28-Oct-2018 13:00:00, 7.20e-02  
28-Oct-2018 14:00:00, 7.20e-02  
28-Oct-2018 15:00:00, 7.20e-02  
28-Oct-2018 16:00:00, 7.20e-02  
28-Oct-2018 17:00:00, 7.20e-02  
28-Oct-2018 18:00:00, 7.20e-02  
28-Oct-2018 19:00:00, 7.20e-02  
28-Oct-2018 20:00:00, 7.20e-02  
28-Oct-2018 21:00:00, 7.20e-02  
28-Oct-2018 22:00:00, 7.20e-02  
28-Oct-2018 23:00:00, 7.20e-02  
29-Oct-2018, 7.20e-02  
29-Oct-2018 01:00:00, 7.20e-02  
29-Oct-2018 02:00:00, 7.20e-02  
29-Oct-2018 03:00:00, 7.10e-02  
29-Oct-2018 04:00:00, 7.10e-02  
29-Oct-2018 05:00:00, 7.10e-02  
29-Oct-2018 06:00:00, 7.10e-02  
29-Oct-2018 07:00:00, 7.10e-02  
29-Oct-2018 08:00:00, 7.10e-02  
29-Oct-2018 09:00:00, 7.20e-02  
29-Oct-2018 10:00:00, 7.20e-02  
29-Oct-2018 11:00:00, 7.20e-02  
29-Oct-2018 12:00:00, 7.20e-02  
29-Oct-2018 13:00:00, 7.20e-02  
29-Oct-2018 14:00:00, 7.20e-02  
29-Oct-2018 15:00:00, 7.20e-02  
29-Oct-2018 16:00:00, 7.20e-02  
29-Oct-2018 17:00:00, 7.20e-02  
29-Oct-2018 18:00:00, 7.20e-02  
29-Oct-2018 19:00:00, 7.20e-02  
29-Oct-2018 20:00:00, 7.20e-02  
29-Oct-2018 21:00:00, 7.20e-02  
29-Oct-2018 22:00:00, 7.10e-02  
29-Oct-2018 23:00:00, 7.10e-02  
30-Oct-2018, 7.10e-02  
30-Oct-2018 01:00:00, 7.10e-02  
30-Oct-2018 02:00:00, 7.10e-02  
30-Oct-2018 03:00:00, 7.10e-02  
30-Oct-2018 04:00:00, 7.10e-02  
30-Oct-2018 05:00:00, 7.20e-02  
30-Oct-2018 06:00:00, 7.10e-02  
30-Oct-2018 07:00:00, 7.10e-02  
30-Oct-2018 08:00:00, 7.20e-02  
30-Oct-2018 09:00:00, 7.20e-02  
30-Oct-2018 10:00:00, 7.20e-02  
30-Oct-2018 11:00:00, 7.20e-02  
30-Oct-2018 12:00:00, 7.30e-02  
30-Oct-2018 13:00:00, 7.30e-02  
30-Oct-2018 14:00:00, 7.40e-02  
30-Oct-2018 15:00:00, 7.40e-02

30-Oct-2018 16:00:00, 7.40e-02  
30-Oct-2018 17:00:00, 7.40e-02  
30-Oct-2018 18:00:00, 7.40e-02  
30-Oct-2018 19:00:00, 7.30e-02  
30-Oct-2018 20:00:00, 7.30e-02  
30-Oct-2018 21:00:00, 7.30e-02  
30-Oct-2018 22:00:00, 7.30e-02  
30-Oct-2018 23:00:00, 7.30e-02  
31-Oct-2018, 7.30e-02  
31-Oct-2018 01:00:00, 7.30e-02  
31-Oct-2018 02:00:00, 7.20e-02  
31-Oct-2018 03:00:00, 7.20e-02  
31-Oct-2018 04:00:00, 7.20e-02  
31-Oct-2018 05:00:00, 7.20e-02  
31-Oct-2018 06:00:00, 7.20e-02  
31-Oct-2018 07:00:00, 7.20e-02  
31-Oct-2018 08:00:00, 7.20e-02  
31-Oct-2018 09:00:00, 7.20e-02  
31-Oct-2018 10:00:00, 7.20e-02  
31-Oct-2018 11:00:00, 7.20e-02  
31-Oct-2018 12:00:00, 7.20e-02  
31-Oct-2018 13:00:00, 7.20e-02  
31-Oct-2018 14:00:00, 7.10e-02  
31-Oct-2018 15:00:00, 7.10e-02  
31-Oct-2018 16:00:00, 7.10e-02  
31-Oct-2018 17:00:00, 7.10e-02  
31-Oct-2018 18:00:00, 7.10e-02  
31-Oct-2018 19:00:00, 7.10e-02  
31-Oct-2018 20:00:00, 7.10e-02  
31-Oct-2018 21:00:00, 7.10e-02  
31-Oct-2018 22:00:00, 7.10e-02  
31-Oct-2018 23:00:00, 7.10e-02  
01-Nov-2018, NaN  
01-Nov-2018 01:00:00, NaN  
01-Nov-2018 02:00:00, NaN  
01-Nov-2018 03:00:00, NaN  
01-Nov-2018 04:00:00, NaN  
01-Nov-2018 05:00:00, NaN  
01-Nov-2018 06:00:00, NaN  
01-Nov-2018 07:00:00, NaN  
01-Nov-2018 08:00:00, NaN  
01-Nov-2018 09:00:00, NaN  
01-Nov-2018 10:00:00, NaN  
01-Nov-2018 11:00:00, NaN  
01-Nov-2018 12:00:00, NaN  
01-Nov-2018 13:00:00, NaN  
01-Nov-2018 14:00:00, NaN  
01-Nov-2018 15:00:00, NaN  
01-Nov-2018 16:00:00, NaN  
01-Nov-2018 17:00:00, NaN  
01-Nov-2018 18:00:00, NaN  
01-Nov-2018 19:00:00, NaN  
01-Nov-2018 20:00:00, NaN  
01-Nov-2018 21:00:00, NaN  
01-Nov-2018 22:00:00, NaN  
01-Nov-2018 23:00:00, NaN  
02-Nov-2018, NaN  
02-Nov-2018 01:00:00, NaN  
02-Nov-2018 02:00:00, NaN  
02-Nov-2018 03:00:00, NaN  
02-Nov-2018 04:00:00, NaN  
02-Nov-2018 05:00:00, NaN  
02-Nov-2018 06:00:00, NaN  
02-Nov-2018 07:00:00, NaN

|              |           |     |
|--------------|-----------|-----|
| 02-Nov-2018  | 08:00:00, | NaN |
| 02-Nov-2018  | 09:00:00, | NaN |
| 02-Nov-2018  | 10:00:00, | NaN |
| 02-Nov-2018  | 11:00:00, | NaN |
| 02-Nov-2018  | 12:00:00, | NaN |
| 02-Nov-2018  | 13:00:00, | NaN |
| 02-Nov-2018  | 14:00:00, | NaN |
| 02-Nov-2018  | 15:00:00, | NaN |
| 02-Nov-2018  | 16:00:00, | NaN |
| 02-Nov-2018  | 17:00:00, | NaN |
| 02-Nov-2018  | 18:00:00, | NaN |
| 02-Nov-2018  | 19:00:00, | NaN |
| 02-Nov-2018  | 20:00:00, | NaN |
| 02-Nov-2018  | 21:00:00, | NaN |
| 02-Nov-2018  | 22:00:00, | NaN |
| 02-Nov-2018  | 23:00:00, | NaN |
| 03-Nov-2018, | NaN       |     |
| 03-Nov-2018  | 01:00:00, | NaN |
| 03-Nov-2018  | 02:00:00, | NaN |
| 03-Nov-2018  | 03:00:00, | NaN |
| 03-Nov-2018  | 04:00:00, | NaN |
| 03-Nov-2018  | 05:00:00, | NaN |
| 03-Nov-2018  | 06:00:00, | NaN |
| 03-Nov-2018  | 07:00:00, | NaN |
| 03-Nov-2018  | 08:00:00, | NaN |
| 03-Nov-2018  | 09:00:00, | NaN |
| 03-Nov-2018  | 10:00:00, | NaN |
| 03-Nov-2018  | 11:00:00, | NaN |
| 03-Nov-2018  | 12:00:00, | NaN |
| 03-Nov-2018  | 13:00:00, | NaN |
| 03-Nov-2018  | 14:00:00, | NaN |
| 03-Nov-2018  | 15:00:00, | NaN |
| 03-Nov-2018  | 16:00:00, | NaN |
| 03-Nov-2018  | 17:00:00, | NaN |
| 03-Nov-2018  | 18:00:00, | NaN |
| 03-Nov-2018  | 19:00:00, | NaN |
| 03-Nov-2018  | 20:00:00, | NaN |
| 03-Nov-2018  | 21:00:00, | NaN |
| 03-Nov-2018  | 22:00:00, | NaN |
| 03-Nov-2018  | 23:00:00, | NaN |
| 04-Nov-2018, | NaN       |     |
| 04-Nov-2018  | 01:00:00, | NaN |
| 04-Nov-2018  | 02:00:00, | NaN |
| 04-Nov-2018  | 03:00:00, | NaN |
| 04-Nov-2018  | 04:00:00, | NaN |
| 04-Nov-2018  | 05:00:00, | NaN |
| 04-Nov-2018  | 06:00:00, | NaN |
| 04-Nov-2018  | 07:00:00, | NaN |
| 04-Nov-2018  | 08:00:00, | NaN |
| 04-Nov-2018  | 09:00:00, | NaN |
| 04-Nov-2018  | 10:00:00, | NaN |
| 04-Nov-2018  | 11:00:00, | NaN |
| 04-Nov-2018  | 12:00:00, | NaN |
| 04-Nov-2018  | 13:00:00, | NaN |
| 04-Nov-2018  | 14:00:00, | NaN |
| 04-Nov-2018  | 15:00:00, | NaN |
| 04-Nov-2018  | 16:00:00, | NaN |
| 04-Nov-2018  | 17:00:00, | NaN |
| 04-Nov-2018  | 18:00:00, | NaN |
| 04-Nov-2018  | 19:00:00, | NaN |
| 04-Nov-2018  | 20:00:00, | NaN |
| 04-Nov-2018  | 21:00:00, | NaN |
| 04-Nov-2018  | 22:00:00, | NaN |
| 04-Nov-2018  | 23:00:00, | NaN |

05-Nov-2018, NaN  
05-Nov-2018 01:00:00, NaN  
05-Nov-2018 02:00:00, NaN  
05-Nov-2018 03:00:00, NaN  
05-Nov-2018 04:00:00, NaN  
05-Nov-2018 05:00:00, NaN  
05-Nov-2018 06:00:00, NaN  
05-Nov-2018 07:00:00, NaN  
05-Nov-2018 08:00:00, NaN  
05-Nov-2018 09:00:00, NaN  
05-Nov-2018 10:00:00, NaN  
05-Nov-2018 11:00:00, NaN  
05-Nov-2018 12:00:00, NaN  
05-Nov-2018 13:00:00, NaN  
05-Nov-2018 14:00:00, NaN  
05-Nov-2018 15:00:00, NaN  
05-Nov-2018 16:00:00, NaN  
05-Nov-2018 17:00:00, NaN  
05-Nov-2018 18:00:00, NaN  
05-Nov-2018 19:00:00, NaN  
05-Nov-2018 20:00:00, NaN  
05-Nov-2018 21:00:00, NaN  
05-Nov-2018 22:00:00, NaN  
05-Nov-2018 23:00:00, NaN  
06-Nov-2018, NaN  
06-Nov-2018 01:00:00, NaN  
06-Nov-2018 02:00:00, NaN  
06-Nov-2018 03:00:00, NaN  
06-Nov-2018 04:00:00, NaN  
06-Nov-2018 05:00:00, NaN  
06-Nov-2018 06:00:00, NaN  
06-Nov-2018 07:00:00, NaN  
06-Nov-2018 08:00:00, NaN  
06-Nov-2018 09:00:00, NaN  
06-Nov-2018 10:00:00, NaN  
06-Nov-2018 11:00:00, NaN  
06-Nov-2018 12:00:00, NaN  
06-Nov-2018 13:00:00, NaN  
06-Nov-2018 14:00:00, NaN  
06-Nov-2018 15:00:00, NaN  
06-Nov-2018 16:00:00, NaN  
06-Nov-2018 17:00:00, NaN  
06-Nov-2018 18:00:00, NaN  
06-Nov-2018 19:00:00, NaN  
06-Nov-2018 20:00:00, NaN  
06-Nov-2018 21:00:00, NaN  
06-Nov-2018 22:00:00, NaN  
06-Nov-2018 23:00:00, NaN  
07-Nov-2018, NaN  
07-Nov-2018 01:00:00, NaN  
07-Nov-2018 02:00:00, NaN  
07-Nov-2018 03:00:00, NaN  
07-Nov-2018 04:00:00, NaN  
07-Nov-2018 05:00:00, NaN  
07-Nov-2018 06:00:00, NaN  
07-Nov-2018 07:00:00, NaN  
07-Nov-2018 08:00:00, NaN  
07-Nov-2018 09:00:00, NaN  
07-Nov-2018 10:00:00, NaN  
07-Nov-2018 11:00:00, NaN  
07-Nov-2018 12:00:00, NaN  
07-Nov-2018 13:00:00, NaN  
07-Nov-2018 14:00:00, NaN  
07-Nov-2018 15:00:00, NaN



07-Nov-2018 16:00:00, NaN  
07-Nov-2018 17:00:00, NaN  
07-Nov-2018 18:00:00, NaN  
07-Nov-2018 19:00:00, NaN  
07-Nov-2018 20:00:00, NaN  
07-Nov-2018 21:00:00, NaN  
07-Nov-2018 22:00:00, NaN  
07-Nov-2018 23:00:00, NaN  
08-Nov-2018, NaN  
08-Nov-2018 01:00:00, NaN  
08-Nov-2018 02:00:00, NaN  
08-Nov-2018 03:00:00, NaN  
08-Nov-2018 04:00:00, NaN  
08-Nov-2018 05:00:00, NaN  
08-Nov-2018 06:00:00, NaN  
08-Nov-2018 07:00:00, NaN  
08-Nov-2018 08:00:00, NaN  
08-Nov-2018 09:00:00, NaN  
08-Nov-2018 10:00:00, NaN  
08-Nov-2018 11:00:00, NaN  
08-Nov-2018 12:00:00, NaN  
08-Nov-2018 13:00:00, NaN  
08-Nov-2018 14:00:00, NaN  
08-Nov-2018 15:00:00, NaN  
08-Nov-2018 16:00:00, NaN  
08-Nov-2018 17:00:00, NaN  
08-Nov-2018 18:00:00, NaN  
08-Nov-2018 19:00:00, NaN  
08-Nov-2018 20:00:00, NaN  
08-Nov-2018 21:00:00, NaN  
08-Nov-2018 22:00:00, NaN  
08-Nov-2018 23:00:00, NaN  
09-Nov-2018, NaN  
09-Nov-2018 01:00:00, NaN  
09-Nov-2018 02:00:00, NaN  
09-Nov-2018 03:00:00, NaN  
09-Nov-2018 04:00:00, NaN  
09-Nov-2018 05:00:00, NaN  
09-Nov-2018 06:00:00, NaN  
09-Nov-2018 07:00:00, NaN  
09-Nov-2018 08:00:00, NaN  
09-Nov-2018 09:00:00, NaN  
09-Nov-2018 10:00:00, NaN  
09-Nov-2018 11:00:00, NaN  
09-Nov-2018 12:00:00, NaN  
09-Nov-2018 13:00:00, NaN  
09-Nov-2018 14:00:00, NaN  
09-Nov-2018 15:00:00, NaN  
09-Nov-2018 16:00:00, NaN  
09-Nov-2018 17:00:00, NaN  
09-Nov-2018 18:00:00, NaN  
09-Nov-2018 19:00:00, NaN  
09-Nov-2018 20:00:00, NaN  
09-Nov-2018 21:00:00, NaN  
09-Nov-2018 22:00:00, NaN  
09-Nov-2018 23:00:00, NaN  
10-Nov-2018, NaN  
10-Nov-2018 01:00:00, NaN  
10-Nov-2018 02:00:00, NaN  
10-Nov-2018 03:00:00, NaN  
10-Nov-2018 04:00:00, NaN  
10-Nov-2018 05:00:00, NaN  
10-Nov-2018 06:00:00, NaN  
10-Nov-2018 07:00:00, NaN

|              |           |     |
|--------------|-----------|-----|
| 10-Nov-2018  | 08:00:00, | NaN |
| 10-Nov-2018  | 09:00:00, | NaN |
| 10-Nov-2018  | 10:00:00, | NaN |
| 10-Nov-2018  | 11:00:00, | NaN |
| 10-Nov-2018  | 12:00:00, | NaN |
| 10-Nov-2018  | 13:00:00, | NaN |
| 10-Nov-2018  | 14:00:00, | NaN |
| 10-Nov-2018  | 15:00:00, | NaN |
| 10-Nov-2018  | 16:00:00, | NaN |
| 10-Nov-2018  | 17:00:00, | NaN |
| 10-Nov-2018  | 18:00:00, | NaN |
| 10-Nov-2018  | 19:00:00, | NaN |
| 10-Nov-2018  | 20:00:00, | NaN |
| 10-Nov-2018  | 21:00:00, | NaN |
| 10-Nov-2018  | 22:00:00, | NaN |
| 10-Nov-2018  | 23:00:00, | NaN |
| 11-Nov-2018, | NaN       |     |
| 11-Nov-2018  | 01:00:00, | NaN |
| 11-Nov-2018  | 02:00:00, | NaN |
| 11-Nov-2018  | 03:00:00, | NaN |
| 11-Nov-2018  | 04:00:00, | NaN |
| 11-Nov-2018  | 05:00:00, | NaN |
| 11-Nov-2018  | 06:00:00, | NaN |
| 11-Nov-2018  | 07:00:00, | NaN |
| 11-Nov-2018  | 08:00:00, | NaN |
| 11-Nov-2018  | 09:00:00, | NaN |
| 11-Nov-2018  | 10:00:00, | NaN |
| 11-Nov-2018  | 11:00:00, | NaN |
| 11-Nov-2018  | 12:00:00, | NaN |
| 11-Nov-2018  | 13:00:00, | NaN |
| 11-Nov-2018  | 14:00:00, | NaN |
| 11-Nov-2018  | 15:00:00, | NaN |
| 11-Nov-2018  | 16:00:00, | NaN |
| 11-Nov-2018  | 17:00:00, | NaN |
| 11-Nov-2018  | 18:00:00, | NaN |
| 11-Nov-2018  | 19:00:00, | NaN |
| 11-Nov-2018  | 20:00:00, | NaN |
| 11-Nov-2018  | 21:00:00, | NaN |
| 11-Nov-2018  | 22:00:00, | NaN |
| 11-Nov-2018  | 23:00:00, | NaN |
| 12-Nov-2018, | NaN       |     |
| 12-Nov-2018  | 01:00:00, | NaN |
| 12-Nov-2018  | 02:00:00, | NaN |
| 12-Nov-2018  | 03:00:00, | NaN |
| 12-Nov-2018  | 04:00:00, | NaN |
| 12-Nov-2018  | 05:00:00, | NaN |
| 12-Nov-2018  | 06:00:00, | NaN |
| 12-Nov-2018  | 07:00:00, | NaN |
| 12-Nov-2018  | 08:00:00, | NaN |
| 12-Nov-2018  | 09:00:00, | NaN |
| 12-Nov-2018  | 10:00:00, | NaN |
| 12-Nov-2018  | 11:00:00, | NaN |
| 12-Nov-2018  | 12:00:00, | NaN |
| 12-Nov-2018  | 13:00:00, | NaN |
| 12-Nov-2018  | 14:00:00, | NaN |
| 12-Nov-2018  | 15:00:00, | NaN |
| 12-Nov-2018  | 16:00:00, | NaN |
| 12-Nov-2018  | 17:00:00, | NaN |
| 12-Nov-2018  | 18:00:00, | NaN |
| 12-Nov-2018  | 19:00:00, | NaN |
| 12-Nov-2018  | 20:00:00, | NaN |
| 12-Nov-2018  | 21:00:00, | NaN |
| 12-Nov-2018  | 22:00:00, | NaN |
| 12-Nov-2018  | 23:00:00, | NaN |

13-Nov-2018, NaN  
13-Nov-2018 01:00:00, NaN  
13-Nov-2018 02:00:00, NaN  
13-Nov-2018 03:00:00, NaN  
13-Nov-2018 04:00:00, NaN  
13-Nov-2018 05:00:00, NaN  
13-Nov-2018 06:00:00, NaN  
13-Nov-2018 07:00:00, NaN  
13-Nov-2018 08:00:00, NaN  
13-Nov-2018 09:00:00, NaN  
13-Nov-2018 10:00:00, NaN  
13-Nov-2018 11:00:00, NaN  
13-Nov-2018 12:00:00, NaN  
13-Nov-2018 13:00:00, NaN  
13-Nov-2018 14:00:00, NaN  
13-Nov-2018 15:00:00, NaN  
13-Nov-2018 16:00:00, NaN  
13-Nov-2018 17:00:00, NaN  
13-Nov-2018 18:00:00, NaN  
13-Nov-2018 19:00:00, NaN  
13-Nov-2018 20:00:00, NaN  
13-Nov-2018 21:00:00, NaN  
13-Nov-2018 22:00:00, NaN  
13-Nov-2018 23:00:00, NaN  
14-Nov-2018, NaN  
14-Nov-2018 01:00:00, NaN  
14-Nov-2018 02:00:00, NaN  
14-Nov-2018 03:00:00, NaN  
14-Nov-2018 04:00:00, NaN  
14-Nov-2018 05:00:00, NaN  
14-Nov-2018 06:00:00, NaN  
14-Nov-2018 07:00:00, NaN  
14-Nov-2018 08:00:00, NaN  
14-Nov-2018 09:00:00, NaN  
14-Nov-2018 10:00:00, NaN  
14-Nov-2018 11:00:00, NaN  
14-Nov-2018 12:00:00, NaN  
14-Nov-2018 13:00:00, NaN  
14-Nov-2018 14:00:00, NaN  
14-Nov-2018 15:00:00, NaN  
14-Nov-2018 16:00:00, NaN  
14-Nov-2018 17:00:00, NaN  
14-Nov-2018 18:00:00, NaN  
14-Nov-2018 19:00:00, NaN  
14-Nov-2018 20:00:00, NaN  
14-Nov-2018 21:00:00, NaN  
14-Nov-2018 22:00:00, NaN  
14-Nov-2018 23:00:00, NaN  
15-Nov-2018, NaN  
15-Nov-2018 01:00:00, NaN  
15-Nov-2018 02:00:00, NaN  
15-Nov-2018 03:00:00, NaN  
15-Nov-2018 04:00:00, NaN  
15-Nov-2018 05:00:00, NaN  
15-Nov-2018 06:00:00, NaN  
15-Nov-2018 07:00:00, NaN  
15-Nov-2018 08:00:00, NaN  
15-Nov-2018 09:00:00, NaN  
15-Nov-2018 10:00:00, NaN  
15-Nov-2018 11:00:00, NaN  
15-Nov-2018 12:00:00, NaN  
15-Nov-2018 13:00:00, NaN  
15-Nov-2018 14:00:00, NaN  
15-Nov-2018 15:00:00, NaN

15-Nov-2018 16:00:00, NaN  
15-Nov-2018 17:00:00, NaN  
15-Nov-2018 18:00:00, NaN  
15-Nov-2018 19:00:00, NaN  
15-Nov-2018 20:00:00, NaN  
15-Nov-2018 21:00:00, NaN  
15-Nov-2018 22:00:00, NaN  
15-Nov-2018 23:00:00, NaN  
16-Nov-2018, NaN  
16-Nov-2018 01:00:00, NaN  
16-Nov-2018 02:00:00, NaN  
16-Nov-2018 03:00:00, NaN  
16-Nov-2018 04:00:00, NaN  
16-Nov-2018 05:00:00, NaN  
16-Nov-2018 06:00:00, NaN  
16-Nov-2018 07:00:00, NaN  
16-Nov-2018 08:00:00, NaN  
16-Nov-2018 09:00:00, NaN  
16-Nov-2018 10:00:00, NaN  
16-Nov-2018 11:00:00, NaN  
16-Nov-2018 12:00:00, NaN  
16-Nov-2018 13:00:00, NaN  
16-Nov-2018 14:00:00, NaN  
16-Nov-2018 15:00:00, NaN  
16-Nov-2018 16:00:00, NaN  
16-Nov-2018 17:00:00, NaN  
16-Nov-2018 18:00:00, NaN  
16-Nov-2018 19:00:00, NaN  
16-Nov-2018 20:00:00, NaN  
16-Nov-2018 21:00:00, NaN  
16-Nov-2018 22:00:00, NaN  
16-Nov-2018 23:00:00, NaN  
17-Nov-2018, NaN  
17-Nov-2018 01:00:00, NaN  
17-Nov-2018 02:00:00, NaN  
17-Nov-2018 03:00:00, NaN  
17-Nov-2018 04:00:00, NaN  
17-Nov-2018 05:00:00, NaN  
17-Nov-2018 06:00:00, NaN  
17-Nov-2018 07:00:00, NaN  
17-Nov-2018 08:00:00, NaN  
17-Nov-2018 09:00:00, NaN  
17-Nov-2018 10:00:00, NaN  
17-Nov-2018 11:00:00, NaN  
17-Nov-2018 12:00:00, NaN  
17-Nov-2018 13:00:00, NaN  
17-Nov-2018 14:00:00, NaN  
17-Nov-2018 15:00:00, NaN  
17-Nov-2018 16:00:00, NaN  
17-Nov-2018 17:00:00, NaN  
17-Nov-2018 18:00:00, NaN  
17-Nov-2018 19:00:00, NaN  
17-Nov-2018 20:00:00, NaN  
17-Nov-2018 21:00:00, NaN  
17-Nov-2018 22:00:00, NaN  
17-Nov-2018 23:00:00, NaN  
18-Nov-2018, NaN  
18-Nov-2018 01:00:00, NaN  
18-Nov-2018 02:00:00, NaN  
18-Nov-2018 03:00:00, NaN  
18-Nov-2018 04:00:00, NaN  
18-Nov-2018 05:00:00, NaN  
18-Nov-2018 06:00:00, NaN  
18-Nov-2018 07:00:00, NaN

|              |           |     |
|--------------|-----------|-----|
| 18-Nov-2018  | 08:00:00, | NaN |
| 18-Nov-2018  | 09:00:00, | NaN |
| 18-Nov-2018  | 10:00:00, | NaN |
| 18-Nov-2018  | 11:00:00, | NaN |
| 18-Nov-2018  | 12:00:00, | NaN |
| 18-Nov-2018  | 13:00:00, | NaN |
| 18-Nov-2018  | 14:00:00, | NaN |
| 18-Nov-2018  | 15:00:00, | NaN |
| 18-Nov-2018  | 16:00:00, | NaN |
| 18-Nov-2018  | 17:00:00, | NaN |
| 18-Nov-2018  | 18:00:00, | NaN |
| 18-Nov-2018  | 19:00:00, | NaN |
| 18-Nov-2018  | 20:00:00, | NaN |
| 18-Nov-2018  | 21:00:00, | NaN |
| 18-Nov-2018  | 22:00:00, | NaN |
| 18-Nov-2018  | 23:00:00, | NaN |
| 19-Nov-2018, | NaN       |     |
| 19-Nov-2018  | 01:00:00, | NaN |
| 19-Nov-2018  | 02:00:00, | NaN |
| 19-Nov-2018  | 03:00:00, | NaN |
| 19-Nov-2018  | 04:00:00, | NaN |
| 19-Nov-2018  | 05:00:00, | NaN |
| 19-Nov-2018  | 06:00:00, | NaN |
| 19-Nov-2018  | 07:00:00, | NaN |
| 19-Nov-2018  | 08:00:00, | NaN |
| 19-Nov-2018  | 09:00:00, | NaN |
| 19-Nov-2018  | 10:00:00, | NaN |
| 19-Nov-2018  | 11:00:00, | NaN |
| 19-Nov-2018  | 12:00:00, | NaN |
| 19-Nov-2018  | 13:00:00, | NaN |
| 19-Nov-2018  | 14:00:00, | NaN |
| 19-Nov-2018  | 15:00:00, | NaN |
| 19-Nov-2018  | 16:00:00, | NaN |
| 19-Nov-2018  | 17:00:00, | NaN |
| 19-Nov-2018  | 18:00:00, | NaN |
| 19-Nov-2018  | 19:00:00, | NaN |
| 19-Nov-2018  | 20:00:00, | NaN |
| 19-Nov-2018  | 21:00:00, | NaN |
| 19-Nov-2018  | 22:00:00, | NaN |
| 19-Nov-2018  | 23:00:00, | NaN |
| 20-Nov-2018, | NaN       |     |
| 20-Nov-2018  | 01:00:00, | NaN |
| 20-Nov-2018  | 02:00:00, | NaN |
| 20-Nov-2018  | 03:00:00, | NaN |
| 20-Nov-2018  | 04:00:00, | NaN |
| 20-Nov-2018  | 05:00:00, | NaN |
| 20-Nov-2018  | 06:00:00, | NaN |
| 20-Nov-2018  | 07:00:00, | NaN |
| 20-Nov-2018  | 08:00:00, | NaN |
| 20-Nov-2018  | 09:00:00, | NaN |
| 20-Nov-2018  | 10:00:00, | NaN |
| 20-Nov-2018  | 11:00:00, | NaN |
| 20-Nov-2018  | 12:00:00, | NaN |
| 20-Nov-2018  | 13:00:00, | NaN |
| 20-Nov-2018  | 14:00:00, | NaN |
| 20-Nov-2018  | 15:00:00, | NaN |
| 20-Nov-2018  | 16:00:00, | NaN |
| 20-Nov-2018  | 17:00:00, | NaN |
| 20-Nov-2018  | 18:00:00, | NaN |
| 20-Nov-2018  | 19:00:00, | NaN |
| 20-Nov-2018  | 20:00:00, | NaN |
| 20-Nov-2018  | 21:00:00, | NaN |
| 20-Nov-2018  | 22:00:00, | NaN |
| 20-Nov-2018  | 23:00:00, | NaN |

21-Nov-2018, NaN  
21-Nov-2018 01:00:00, NaN  
21-Nov-2018 02:00:00, NaN  
21-Nov-2018 03:00:00, NaN  
21-Nov-2018 04:00:00, NaN  
21-Nov-2018 05:00:00, NaN  
21-Nov-2018 06:00:00, NaN  
21-Nov-2018 07:00:00, NaN  
21-Nov-2018 08:00:00, NaN  
21-Nov-2018 09:00:00, NaN  
21-Nov-2018 10:00:00, NaN  
21-Nov-2018 11:00:00, NaN  
21-Nov-2018 12:00:00, NaN  
21-Nov-2018 13:00:00, NaN  
21-Nov-2018 14:00:00, NaN  
21-Nov-2018 15:00:00, NaN  
21-Nov-2018 16:00:00, NaN  
21-Nov-2018 17:00:00, NaN  
21-Nov-2018 18:00:00, NaN  
21-Nov-2018 19:00:00, NaN  
21-Nov-2018 20:00:00, NaN  
21-Nov-2018 21:00:00, NaN  
21-Nov-2018 22:00:00, NaN  
21-Nov-2018 23:00:00, NaN  
22-Nov-2018, NaN  
22-Nov-2018 01:00:00, NaN  
22-Nov-2018 02:00:00, NaN  
22-Nov-2018 03:00:00, NaN  
22-Nov-2018 04:00:00, NaN  
22-Nov-2018 05:00:00, NaN  
22-Nov-2018 06:00:00, NaN  
22-Nov-2018 07:00:00, NaN  
22-Nov-2018 08:00:00, NaN  
22-Nov-2018 09:00:00, NaN  
22-Nov-2018 10:00:00, NaN  
22-Nov-2018 11:00:00, NaN  
22-Nov-2018 12:00:00, NaN  
22-Nov-2018 13:00:00, NaN  
22-Nov-2018 14:00:00, NaN  
22-Nov-2018 15:00:00, NaN  
22-Nov-2018 16:00:00, NaN  
22-Nov-2018 17:00:00, NaN  
22-Nov-2018 18:00:00, NaN  
22-Nov-2018 19:00:00, NaN  
22-Nov-2018 20:00:00, NaN  
22-Nov-2018 21:00:00, NaN  
22-Nov-2018 22:00:00, NaN  
22-Nov-2018 23:00:00, NaN  
23-Nov-2018, NaN  
23-Nov-2018 01:00:00, NaN  
23-Nov-2018 02:00:00, NaN  
23-Nov-2018 03:00:00, NaN  
23-Nov-2018 04:00:00, NaN  
23-Nov-2018 05:00:00, NaN  
23-Nov-2018 06:00:00, NaN  
23-Nov-2018 07:00:00, NaN  
23-Nov-2018 08:00:00, NaN  
23-Nov-2018 09:00:00, NaN  
23-Nov-2018 10:00:00, NaN  
23-Nov-2018 11:00:00, NaN  
23-Nov-2018 12:00:00, NaN  
23-Nov-2018 13:00:00, NaN  
23-Nov-2018 14:00:00, NaN  
23-Nov-2018 15:00:00, NaN

23-Nov-2018 16:00:00, NaN  
23-Nov-2018 17:00:00, NaN  
23-Nov-2018 18:00:00, NaN  
23-Nov-2018 19:00:00, NaN  
23-Nov-2018 20:00:00, NaN  
23-Nov-2018 21:00:00, NaN  
23-Nov-2018 22:00:00, NaN  
23-Nov-2018 23:00:00, NaN  
24-Nov-2018, NaN  
24-Nov-2018 01:00:00, NaN  
24-Nov-2018 02:00:00, NaN  
24-Nov-2018 03:00:00, NaN  
24-Nov-2018 04:00:00, NaN  
24-Nov-2018 05:00:00, NaN  
24-Nov-2018 06:00:00, NaN  
24-Nov-2018 07:00:00, NaN  
24-Nov-2018 08:00:00, NaN  
24-Nov-2018 09:00:00, NaN  
24-Nov-2018 10:00:00, NaN  
24-Nov-2018 11:00:00, NaN  
24-Nov-2018 12:00:00, NaN  
24-Nov-2018 13:00:00, NaN  
24-Nov-2018 14:00:00, NaN  
24-Nov-2018 15:00:00, NaN  
24-Nov-2018 16:00:00, NaN  
24-Nov-2018 17:00:00, NaN  
24-Nov-2018 18:00:00, NaN  
24-Nov-2018 19:00:00, NaN  
24-Nov-2018 20:00:00, NaN  
24-Nov-2018 21:00:00, NaN  
24-Nov-2018 22:00:00, NaN  
24-Nov-2018 23:00:00, NaN  
25-Nov-2018, NaN  
25-Nov-2018 01:00:00, NaN  
25-Nov-2018 02:00:00, NaN  
25-Nov-2018 03:00:00, NaN  
25-Nov-2018 04:00:00, NaN  
25-Nov-2018 05:00:00, NaN  
25-Nov-2018 06:00:00, NaN  
25-Nov-2018 07:00:00, NaN  
25-Nov-2018 08:00:00, NaN  
25-Nov-2018 09:00:00, NaN  
25-Nov-2018 10:00:00, NaN  
25-Nov-2018 11:00:00, NaN  
25-Nov-2018 12:00:00, NaN  
25-Nov-2018 13:00:00, NaN  
25-Nov-2018 14:00:00, NaN  
25-Nov-2018 15:00:00, NaN  
25-Nov-2018 16:00:00, NaN  
25-Nov-2018 17:00:00, NaN  
25-Nov-2018 18:00:00, NaN  
25-Nov-2018 19:00:00, NaN  
25-Nov-2018 20:00:00, NaN  
25-Nov-2018 21:00:00, NaN  
25-Nov-2018 22:00:00, NaN  
25-Nov-2018 23:00:00, NaN  
26-Nov-2018, NaN  
26-Nov-2018 01:00:00, NaN  
26-Nov-2018 02:00:00, NaN  
26-Nov-2018 03:00:00, NaN  
26-Nov-2018 04:00:00, NaN  
26-Nov-2018 05:00:00, NaN  
26-Nov-2018 06:00:00, NaN  
26-Nov-2018 07:00:00, NaN

|              |           |     |
|--------------|-----------|-----|
| 26-Nov-2018  | 08:00:00, | NaN |
| 26-Nov-2018  | 09:00:00, | NaN |
| 26-Nov-2018  | 10:00:00, | NaN |
| 26-Nov-2018  | 11:00:00, | NaN |
| 26-Nov-2018  | 12:00:00, | NaN |
| 26-Nov-2018  | 13:00:00, | NaN |
| 26-Nov-2018  | 14:00:00, | NaN |
| 26-Nov-2018  | 15:00:00, | NaN |
| 26-Nov-2018  | 16:00:00, | NaN |
| 26-Nov-2018  | 17:00:00, | NaN |
| 26-Nov-2018  | 18:00:00, | NaN |
| 26-Nov-2018  | 19:00:00, | NaN |
| 26-Nov-2018  | 20:00:00, | NaN |
| 26-Nov-2018  | 21:00:00, | NaN |
| 26-Nov-2018  | 22:00:00, | NaN |
| 26-Nov-2018  | 23:00:00, | NaN |
| 27-Nov-2018, |           | NaN |
| 27-Nov-2018  | 01:00:00, | NaN |
| 27-Nov-2018  | 02:00:00, | NaN |
| 27-Nov-2018  | 03:00:00, | NaN |
| 27-Nov-2018  | 04:00:00, | NaN |
| 27-Nov-2018  | 05:00:00, | NaN |
| 27-Nov-2018  | 06:00:00, | NaN |
| 27-Nov-2018  | 07:00:00, | NaN |
| 27-Nov-2018  | 08:00:00, | NaN |
| 27-Nov-2018  | 09:00:00, | NaN |
| 27-Nov-2018  | 10:00:00, | NaN |
| 27-Nov-2018  | 11:00:00, | NaN |
| 27-Nov-2018  | 12:00:00, | NaN |
| 27-Nov-2018  | 13:00:00, | NaN |
| 27-Nov-2018  | 14:00:00, | NaN |
| 27-Nov-2018  | 15:00:00, | NaN |
| 27-Nov-2018  | 16:00:00, | NaN |
| 27-Nov-2018  | 17:00:00, | NaN |
| 27-Nov-2018  | 18:00:00, | NaN |
| 27-Nov-2018  | 19:00:00, | NaN |
| 27-Nov-2018  | 20:00:00, | NaN |
| 27-Nov-2018  | 21:00:00, | NaN |
| 27-Nov-2018  | 22:00:00, | NaN |
| 27-Nov-2018  | 23:00:00, | NaN |
| 28-Nov-2018, |           | NaN |
| 28-Nov-2018  | 01:00:00, | NaN |
| 28-Nov-2018  | 02:00:00, | NaN |
| 28-Nov-2018  | 03:00:00, | NaN |
| 28-Nov-2018  | 04:00:00, | NaN |
| 28-Nov-2018  | 05:00:00, | NaN |
| 28-Nov-2018  | 06:00:00, | NaN |
| 28-Nov-2018  | 07:00:00, | NaN |
| 28-Nov-2018  | 08:00:00, | NaN |
| 28-Nov-2018  | 09:00:00, | NaN |
| 28-Nov-2018  | 10:00:00, | NaN |
| 28-Nov-2018  | 11:00:00, | NaN |
| 28-Nov-2018  | 12:00:00, | NaN |
| 28-Nov-2018  | 13:00:00, | NaN |
| 28-Nov-2018  | 14:00:00, | NaN |
| 28-Nov-2018  | 15:00:00, | NaN |
| 28-Nov-2018  | 16:00:00, | NaN |
| 28-Nov-2018  | 17:00:00, | NaN |
| 28-Nov-2018  | 18:00:00, | NaN |
| 28-Nov-2018  | 19:00:00, | NaN |
| 28-Nov-2018  | 20:00:00, | NaN |
| 28-Nov-2018  | 21:00:00, | NaN |
| 28-Nov-2018  | 22:00:00, | NaN |
| 28-Nov-2018  | 23:00:00, | NaN |



29-Nov-2018, NaN  
29-Nov-2018 01:00:00, NaN  
29-Nov-2018 02:00:00, NaN  
29-Nov-2018 03:00:00, NaN  
29-Nov-2018 04:00:00, NaN  
29-Nov-2018 05:00:00, NaN  
29-Nov-2018 06:00:00, NaN  
29-Nov-2018 07:00:00, NaN  
29-Nov-2018 08:00:00, NaN  
29-Nov-2018 09:00:00, NaN  
29-Nov-2018 10:00:00, NaN  
29-Nov-2018 11:00:00, NaN  
29-Nov-2018 12:00:00, NaN  
29-Nov-2018 13:00:00, NaN  
29-Nov-2018 14:00:00, NaN  
29-Nov-2018 15:00:00, NaN  
29-Nov-2018 16:00:00, NaN  
29-Nov-2018 17:00:00, NaN  
29-Nov-2018 18:00:00, NaN  
29-Nov-2018 19:00:00, NaN  
29-Nov-2018 20:00:00, NaN  
29-Nov-2018 21:00:00, NaN  
29-Nov-2018 22:00:00, NaN  
29-Nov-2018 23:00:00, NaN  
30-Nov-2018, NaN  
30-Nov-2018 01:00:00, NaN  
30-Nov-2018 02:00:00, NaN  
30-Nov-2018 03:00:00, NaN  
30-Nov-2018 04:00:00, NaN  
30-Nov-2018 05:00:00, NaN  
30-Nov-2018 06:00:00, NaN  
30-Nov-2018 07:00:00, NaN  
30-Nov-2018 08:00:00, NaN  
30-Nov-2018 09:00:00, NaN  
30-Nov-2018 10:00:00, NaN  
30-Nov-2018 11:00:00, NaN  
30-Nov-2018 12:00:00, NaN  
30-Nov-2018 13:00:00, NaN  
30-Nov-2018 14:00:00, NaN  
30-Nov-2018 15:00:00, NaN  
30-Nov-2018 16:00:00, NaN  
30-Nov-2018 17:00:00, NaN  
30-Nov-2018 18:00:00, NaN  
30-Nov-2018 19:00:00, NaN  
30-Nov-2018 20:00:00, NaN  
30-Nov-2018 21:00:00, NaN  
30-Nov-2018 22:00:00, NaN  
30-Nov-2018 23:00:00, NaN  
01-Dec-2018, NaN  
01-Dec-2018 01:00:00, NaN  
01-Dec-2018 02:00:00, NaN  
01-Dec-2018 03:00:00, NaN  
01-Dec-2018 04:00:00, NaN  
01-Dec-2018 05:00:00, NaN  
01-Dec-2018 06:00:00, NaN  
01-Dec-2018 07:00:00, NaN  
01-Dec-2018 08:00:00, NaN  
01-Dec-2018 09:00:00, NaN  
01-Dec-2018 10:00:00, NaN  
01-Dec-2018 11:00:00, NaN  
01-Dec-2018 12:00:00, NaN  
01-Dec-2018 13:00:00, NaN  
01-Dec-2018 14:00:00, NaN  
01-Dec-2018 15:00:00, NaN

01-Dec-2018 16:00:00, NaN  
01-Dec-2018 17:00:00, NaN  
01-Dec-2018 18:00:00, NaN  
01-Dec-2018 19:00:00, NaN  
01-Dec-2018 20:00:00, NaN  
01-Dec-2018 21:00:00, NaN  
01-Dec-2018 22:00:00, NaN  
01-Dec-2018 23:00:00, NaN  
02-Dec-2018, NaN  
02-Dec-2018 01:00:00, NaN  
02-Dec-2018 02:00:00, NaN  
02-Dec-2018 03:00:00, NaN  
02-Dec-2018 04:00:00, NaN  
02-Dec-2018 05:00:00, NaN  
02-Dec-2018 06:00:00, NaN  
02-Dec-2018 07:00:00, NaN  
02-Dec-2018 08:00:00, NaN  
02-Dec-2018 09:00:00, NaN  
02-Dec-2018 10:00:00, NaN  
02-Dec-2018 11:00:00, NaN  
02-Dec-2018 12:00:00, NaN  
02-Dec-2018 13:00:00, NaN  
02-Dec-2018 14:00:00, NaN  
02-Dec-2018 15:00:00, NaN  
02-Dec-2018 16:00:00, NaN  
02-Dec-2018 17:00:00, NaN  
02-Dec-2018 18:00:00, NaN  
02-Dec-2018 19:00:00, NaN  
02-Dec-2018 20:00:00, NaN  
02-Dec-2018 21:00:00, NaN  
02-Dec-2018 22:00:00, NaN  
02-Dec-2018 23:00:00, NaN  
03-Dec-2018, NaN  
03-Dec-2018 01:00:00, NaN  
03-Dec-2018 02:00:00, NaN  
03-Dec-2018 03:00:00, NaN  
03-Dec-2018 04:00:00, NaN  
03-Dec-2018 05:00:00, NaN  
03-Dec-2018 06:00:00, NaN  
03-Dec-2018 07:00:00, NaN  
03-Dec-2018 08:00:00, NaN  
03-Dec-2018 09:00:00, NaN  
03-Dec-2018 10:00:00, NaN  
03-Dec-2018 11:00:00, NaN  
03-Dec-2018 12:00:00, NaN  
03-Dec-2018 13:00:00, NaN  
03-Dec-2018 14:00:00, NaN  
03-Dec-2018 15:00:00, NaN  
03-Dec-2018 16:00:00, NaN  
03-Dec-2018 17:00:00, NaN  
03-Dec-2018 18:00:00, NaN  
03-Dec-2018 19:00:00, NaN  
03-Dec-2018 20:00:00, NaN  
03-Dec-2018 21:00:00, NaN  
03-Dec-2018 22:00:00, NaN  
03-Dec-2018 23:00:00, NaN  
04-Dec-2018, NaN  
04-Dec-2018 01:00:00, NaN  
04-Dec-2018 02:00:00, NaN  
04-Dec-2018 03:00:00, NaN  
04-Dec-2018 04:00:00, NaN  
04-Dec-2018 05:00:00, NaN  
04-Dec-2018 06:00:00, NaN  
04-Dec-2018 07:00:00, NaN

04-Dec-2018 08:00:00, NaN  
04-Dec-2018 09:00:00, NaN  
04-Dec-2018 10:00:00, NaN  
04-Dec-2018 11:00:00, NaN  
04-Dec-2018 12:00:00, NaN  
04-Dec-2018 13:00:00, NaN  
04-Dec-2018 14:00:00, NaN  
04-Dec-2018 15:00:00, NaN  
04-Dec-2018 16:00:00, NaN  
04-Dec-2018 17:00:00, NaN  
04-Dec-2018 18:00:00, NaN  
04-Dec-2018 19:00:00, NaN  
04-Dec-2018 20:00:00, NaN  
04-Dec-2018 21:00:00, NaN  
04-Dec-2018 22:00:00, NaN  
04-Dec-2018 23:00:00, NaN  
05-Dec-2018, NaN  
05-Dec-2018 01:00:00, NaN  
05-Dec-2018 02:00:00, NaN  
05-Dec-2018 03:00:00, NaN  
05-Dec-2018 04:00:00, NaN  
05-Dec-2018 05:00:00, NaN  
05-Dec-2018 06:00:00, NaN  
05-Dec-2018 07:00:00, NaN  
05-Dec-2018 08:00:00, NaN  
05-Dec-2018 09:00:00, NaN  
05-Dec-2018 10:00:00, NaN  
05-Dec-2018 11:00:00, NaN  
05-Dec-2018 12:00:00, NaN  
05-Dec-2018 13:00:00, NaN  
05-Dec-2018 14:00:00, NaN  
05-Dec-2018 15:00:00, NaN  
05-Dec-2018 16:00:00, NaN  
05-Dec-2018 17:00:00, NaN  
05-Dec-2018 18:00:00, NaN  
05-Dec-2018 19:00:00, NaN  
05-Dec-2018 20:00:00, NaN  
05-Dec-2018 21:00:00, NaN  
05-Dec-2018 22:00:00, NaN  
05-Dec-2018 23:00:00, NaN  
06-Dec-2018, NaN  
06-Dec-2018 01:00:00, NaN  
06-Dec-2018 02:00:00, NaN  
06-Dec-2018 03:00:00, NaN  
06-Dec-2018 04:00:00, NaN  
06-Dec-2018 05:00:00, NaN  
06-Dec-2018 06:00:00, NaN  
06-Dec-2018 07:00:00, NaN  
06-Dec-2018 08:00:00, NaN  
06-Dec-2018 09:00:00, NaN  
06-Dec-2018 10:00:00, NaN  
06-Dec-2018 11:00:00, NaN  
06-Dec-2018 12:00:00, NaN  
06-Dec-2018 13:00:00, NaN  
06-Dec-2018 14:00:00, NaN  
06-Dec-2018 15:00:00, NaN  
06-Dec-2018 16:00:00, NaN  
06-Dec-2018 17:00:00, NaN  
06-Dec-2018 18:00:00, NaN  
06-Dec-2018 19:00:00, NaN  
06-Dec-2018 20:00:00, NaN  
06-Dec-2018 21:00:00, NaN  
06-Dec-2018 22:00:00, NaN  
06-Dec-2018 23:00:00, NaN

07-Dec-2018, NaN  
07-Dec-2018 01:00:00, NaN  
07-Dec-2018 02:00:00, NaN  
07-Dec-2018 03:00:00, NaN  
07-Dec-2018 04:00:00, NaN  
07-Dec-2018 05:00:00, NaN  
07-Dec-2018 06:00:00, NaN  
07-Dec-2018 07:00:00, NaN  
07-Dec-2018 08:00:00, NaN  
07-Dec-2018 09:00:00, NaN  
07-Dec-2018 10:00:00, NaN  
07-Dec-2018 11:00:00, NaN  
07-Dec-2018 12:00:00, NaN  
07-Dec-2018 13:00:00, NaN  
07-Dec-2018 14:00:00, NaN  
07-Dec-2018 15:00:00, NaN  
07-Dec-2018 16:00:00, NaN  
07-Dec-2018 17:00:00, NaN  
07-Dec-2018 18:00:00, NaN  
07-Dec-2018 19:00:00, NaN  
07-Dec-2018 20:00:00, NaN  
07-Dec-2018 21:00:00, NaN  
07-Dec-2018 22:00:00, NaN  
07-Dec-2018 23:00:00, NaN  
08-Dec-2018, NaN  
08-Dec-2018 01:00:00, NaN  
08-Dec-2018 02:00:00, NaN  
08-Dec-2018 03:00:00, NaN  
08-Dec-2018 04:00:00, NaN  
08-Dec-2018 05:00:00, NaN  
08-Dec-2018 06:00:00, NaN  
08-Dec-2018 07:00:00, NaN  
08-Dec-2018 08:00:00, NaN  
08-Dec-2018 09:00:00, NaN  
08-Dec-2018 10:00:00, NaN  
08-Dec-2018 11:00:00, NaN  
08-Dec-2018 12:00:00, NaN  
08-Dec-2018 13:00:00, NaN  
08-Dec-2018 14:00:00, NaN  
08-Dec-2018 15:00:00, NaN  
08-Dec-2018 16:00:00, NaN  
08-Dec-2018 17:00:00, NaN  
08-Dec-2018 18:00:00, NaN  
08-Dec-2018 19:00:00, NaN  
08-Dec-2018 20:00:00, NaN  
08-Dec-2018 21:00:00, NaN  
08-Dec-2018 22:00:00, NaN  
08-Dec-2018 23:00:00, NaN  
09-Dec-2018, NaN  
09-Dec-2018 01:00:00, NaN  
09-Dec-2018 02:00:00, NaN  
09-Dec-2018 03:00:00, NaN  
09-Dec-2018 04:00:00, NaN  
09-Dec-2018 05:00:00, NaN  
09-Dec-2018 06:00:00, NaN  
09-Dec-2018 07:00:00, NaN  
09-Dec-2018 08:00:00, NaN  
09-Dec-2018 09:00:00, NaN  
09-Dec-2018 10:00:00, NaN  
09-Dec-2018 11:00:00, NaN  
09-Dec-2018 12:00:00, NaN  
09-Dec-2018 13:00:00, NaN  
09-Dec-2018 14:00:00, NaN  
09-Dec-2018 15:00:00, NaN

09-Dec-2018 16:00:00, NaN  
09-Dec-2018 17:00:00, NaN  
09-Dec-2018 18:00:00, NaN  
09-Dec-2018 19:00:00, NaN  
09-Dec-2018 20:00:00, NaN  
09-Dec-2018 21:00:00, NaN  
09-Dec-2018 22:00:00, NaN  
09-Dec-2018 23:00:00, NaN  
10-Dec-2018, NaN  
10-Dec-2018 01:00:00, NaN  
10-Dec-2018 02:00:00, NaN  
10-Dec-2018 03:00:00, NaN  
10-Dec-2018 04:00:00, NaN  
10-Dec-2018 05:00:00, NaN  
10-Dec-2018 06:00:00, NaN  
10-Dec-2018 14:00:00, NaN  
10-Dec-2018 15:00:00, NaN  
10-Dec-2018 16:00:00, NaN  
10-Dec-2018 17:00:00, NaN  
10-Dec-2018 18:00:00, NaN  
10-Dec-2018 19:00:00, NaN  
10-Dec-2018 20:00:00, NaN  
10-Dec-2018 21:00:00, NaN  
10-Dec-2018 22:00:00, NaN  
10-Dec-2018 23:00:00, NaN  
11-Dec-2018, NaN  
11-Dec-2018 01:00:00, NaN  
11-Dec-2018 02:00:00, NaN  
11-Dec-2018 03:00:00, NaN  
11-Dec-2018 04:00:00, NaN  
11-Dec-2018 05:00:00, NaN  
11-Dec-2018 06:00:00, NaN  
11-Dec-2018 07:00:00, NaN  
11-Dec-2018 08:00:00, NaN  
11-Dec-2018 09:00:00, NaN  
11-Dec-2018 10:00:00, NaN  
11-Dec-2018 11:00:00, NaN  
11-Dec-2018 12:00:00, NaN  
11-Dec-2018 13:00:00, NaN  
11-Dec-2018 14:00:00, NaN  
11-Dec-2018 15:00:00, NaN  
11-Dec-2018 16:00:00, NaN  
11-Dec-2018 17:00:00, NaN  
11-Dec-2018 18:00:00, NaN  
11-Dec-2018 19:00:00, NaN  
11-Dec-2018 20:00:00, NaN  
11-Dec-2018 21:00:00, NaN  
11-Dec-2018 22:00:00, NaN  
11-Dec-2018 23:00:00, NaN  
12-Dec-2018, NaN  
12-Dec-2018 01:00:00, NaN  
12-Dec-2018 02:00:00, NaN  
12-Dec-2018 03:00:00, NaN  
12-Dec-2018 04:00:00, NaN  
12-Dec-2018 05:00:00, NaN  
12-Dec-2018 06:00:00, NaN  
12-Dec-2018 07:00:00, NaN  
12-Dec-2018 08:00:00, NaN  
12-Dec-2018 09:00:00, NaN  
12-Dec-2018 10:00:00, NaN  
12-Dec-2018 11:00:00, NaN  
12-Dec-2018 12:00:00, NaN  
12-Dec-2018 13:00:00, NaN  
12-Dec-2018 14:00:00, NaN

12-Dec-2018 15:00:00, NaN  
12-Dec-2018 16:00:00, NaN  
12-Dec-2018 17:00:00, NaN  
12-Dec-2018 18:00:00, NaN  
12-Dec-2018 19:00:00, NaN  
12-Dec-2018 20:00:00, NaN  
12-Dec-2018 21:00:00, NaN  
12-Dec-2018 22:00:00, NaN  
12-Dec-2018 23:00:00, NaN  
13-Dec-2018, NaN  
13-Dec-2018 01:00:00, NaN  
13-Dec-2018 02:00:00, NaN  
13-Dec-2018 03:00:00, NaN  
13-Dec-2018 04:00:00, NaN  
13-Dec-2018 05:00:00, NaN  
13-Dec-2018 06:00:00, NaN  
13-Dec-2018 07:00:00, NaN  
13-Dec-2018 08:00:00, NaN  
13-Dec-2018 09:00:00, NaN  
13-Dec-2018 10:00:00, NaN  
13-Dec-2018 11:00:00, NaN  
13-Dec-2018 12:00:00, NaN  
13-Dec-2018 13:00:00, NaN  
13-Dec-2018 14:00:00, NaN  
13-Dec-2018 15:00:00, NaN  
13-Dec-2018 16:00:00, NaN  
13-Dec-2018 17:00:00, NaN  
13-Dec-2018 18:00:00, NaN  
13-Dec-2018 19:00:00, NaN  
13-Dec-2018 20:00:00, NaN  
13-Dec-2018 21:00:00, NaN  
13-Dec-2018 22:00:00, NaN  
13-Dec-2018 23:00:00, NaN  
14-Dec-2018, NaN  
14-Dec-2018 01:00:00, NaN  
14-Dec-2018 02:00:00, NaN  
14-Dec-2018 03:00:00, NaN  
14-Dec-2018 04:00:00, NaN  
14-Dec-2018 05:00:00, NaN  
14-Dec-2018 06:00:00, NaN  
14-Dec-2018 07:00:00, NaN  
14-Dec-2018 08:00:00, NaN  
14-Dec-2018 09:00:00, NaN  
14-Dec-2018 10:00:00, NaN  
14-Dec-2018 11:00:00, NaN  
14-Dec-2018 12:00:00, NaN  
14-Dec-2018 13:00:00, NaN  
14-Dec-2018 14:00:00, NaN  
14-Dec-2018 15:00:00, NaN  
14-Dec-2018 16:00:00, NaN  
14-Dec-2018 17:00:00, NaN  
14-Dec-2018 18:00:00, NaN  
14-Dec-2018 19:00:00, NaN  
14-Dec-2018 20:00:00, NaN  
14-Dec-2018 21:00:00, NaN  
14-Dec-2018 22:00:00, NaN  
14-Dec-2018 23:00:00, NaN  
15-Dec-2018, NaN  
15-Dec-2018 01:00:00, NaN  
15-Dec-2018 02:00:00, NaN  
15-Dec-2018 03:00:00, NaN  
15-Dec-2018 04:00:00, NaN  
15-Dec-2018 05:00:00, NaN  
15-Dec-2018 06:00:00, NaN

15-Dec-2018 07:00:00, NaN  
15-Dec-2018 08:00:00, NaN  
15-Dec-2018 09:00:00, NaN  
15-Dec-2018 10:00:00, NaN  
15-Dec-2018 11:00:00, NaN  
15-Dec-2018 12:00:00, NaN  
15-Dec-2018 13:00:00, NaN  
15-Dec-2018 14:00:00, NaN  
15-Dec-2018 15:00:00, NaN  
15-Dec-2018 16:00:00, NaN  
15-Dec-2018 17:00:00, NaN  
15-Dec-2018 18:00:00, NaN  
15-Dec-2018 19:00:00, NaN  
15-Dec-2018 20:00:00, NaN  
15-Dec-2018 21:00:00, NaN  
15-Dec-2018 22:00:00, NaN  
15-Dec-2018 23:00:00, NaN  
16-Dec-2018, NaN  
16-Dec-2018 01:00:00, NaN  
16-Dec-2018 02:00:00, NaN  
16-Dec-2018 03:00:00, NaN  
16-Dec-2018 04:00:00, NaN  
16-Dec-2018 05:00:00, NaN  
16-Dec-2018 06:00:00, NaN  
16-Dec-2018 07:00:00, NaN  
16-Dec-2018 08:00:00, NaN  
16-Dec-2018 09:00:00, NaN  
16-Dec-2018 10:00:00, NaN  
16-Dec-2018 11:00:00, NaN  
16-Dec-2018 12:00:00, NaN  
16-Dec-2018 13:00:00, NaN  
16-Dec-2018 14:00:00, NaN  
16-Dec-2018 15:00:00, NaN  
16-Dec-2018 16:00:00, NaN  
16-Dec-2018 17:00:00, NaN  
16-Dec-2018 18:00:00, NaN  
16-Dec-2018 19:00:00, NaN  
16-Dec-2018 20:00:00, NaN  
16-Dec-2018 21:00:00, NaN  
16-Dec-2018 22:00:00, NaN  
16-Dec-2018 23:00:00, NaN  
17-Dec-2018, NaN  
17-Dec-2018 01:00:00, NaN  
17-Dec-2018 02:00:00, NaN  
17-Dec-2018 03:00:00, NaN  
17-Dec-2018 04:00:00, NaN  
17-Dec-2018 05:00:00, NaN  
17-Dec-2018 06:00:00, NaN  
17-Dec-2018 07:00:00, NaN  
17-Dec-2018 08:00:00, NaN  
17-Dec-2018 09:00:00, NaN  
17-Dec-2018 10:00:00, NaN  
17-Dec-2018 11:00:00, NaN  
17-Dec-2018 12:00:00, NaN  
17-Dec-2018 13:00:00, NaN  
17-Dec-2018 14:00:00, NaN  
17-Dec-2018 15:00:00, NaN  
17-Dec-2018 16:00:00, NaN  
17-Dec-2018 17:00:00, NaN  
17-Dec-2018 18:00:00, NaN  
17-Dec-2018 19:00:00, NaN  
17-Dec-2018 20:00:00, NaN  
17-Dec-2018 21:00:00, NaN  
17-Dec-2018 22:00:00, NaN

17-Dec-2018 23:00:00, NaN  
18-Dec-2018, NaN  
18-Dec-2018 01:00:00, NaN  
18-Dec-2018 02:00:00, NaN  
18-Dec-2018 03:00:00, NaN  
18-Dec-2018 04:00:00, NaN  
18-Dec-2018 05:00:00, NaN  
18-Dec-2018 06:00:00, NaN  
18-Dec-2018 07:00:00, NaN  
18-Dec-2018 08:00:00, NaN  
18-Dec-2018 09:00:00, NaN  
18-Dec-2018 10:00:00, NaN  
18-Dec-2018 11:00:00, NaN  
18-Dec-2018 12:00:00, NaN  
18-Dec-2018 13:00:00, NaN  
18-Dec-2018 14:00:00, NaN  
18-Dec-2018 15:00:00, NaN  
18-Dec-2018 16:00:00, NaN  
18-Dec-2018 17:00:00, NaN  
18-Dec-2018 18:00:00, NaN  
18-Dec-2018 19:00:00, NaN  
18-Dec-2018 20:00:00, NaN  
18-Dec-2018 21:00:00, NaN  
18-Dec-2018 22:00:00, NaN  
18-Dec-2018 23:00:00, NaN  
19-Dec-2018, NaN  
19-Dec-2018 01:00:00, NaN  
19-Dec-2018 02:00:00, NaN  
19-Dec-2018 03:00:00, NaN  
19-Dec-2018 04:00:00, NaN  
19-Dec-2018 05:00:00, NaN  
19-Dec-2018 06:00:00, NaN  
19-Dec-2018 07:00:00, NaN  
19-Dec-2018 08:00:00, NaN  
19-Dec-2018 09:00:00, NaN  
19-Dec-2018 10:00:00, NaN  
19-Dec-2018 11:00:00, NaN  
19-Dec-2018 12:00:00, NaN  
19-Dec-2018 13:00:00, NaN  
19-Dec-2018 14:00:00, NaN  
19-Dec-2018 15:00:00, NaN  
19-Dec-2018 16:00:00, NaN  
19-Dec-2018 17:00:00, NaN  
19-Dec-2018 18:00:00, NaN  
19-Dec-2018 19:00:00, NaN  
19-Dec-2018 20:00:00, NaN  
19-Dec-2018 21:00:00, NaN  
19-Dec-2018 22:00:00, NaN  
19-Dec-2018 23:00:00, NaN  
20-Dec-2018, NaN  
20-Dec-2018 01:00:00, NaN  
20-Dec-2018 02:00:00, NaN  
20-Dec-2018 03:00:00, NaN  
20-Dec-2018 04:00:00, NaN  
20-Dec-2018 05:00:00, NaN  
20-Dec-2018 06:00:00, NaN  
20-Dec-2018 07:00:00, NaN  
20-Dec-2018 08:00:00, NaN  
20-Dec-2018 09:00:00, NaN  
20-Dec-2018 10:00:00, NaN  
20-Dec-2018 11:00:00, NaN  
20-Dec-2018 12:00:00, NaN  
20-Dec-2018 13:00:00, NaN  
20-Dec-2018 14:00:00, NaN



20-Dec-2018 15:00:00, NaN  
20-Dec-2018 16:00:00, NaN  
20-Dec-2018 17:00:00, NaN  
20-Dec-2018 18:00:00, NaN  
20-Dec-2018 19:00:00, NaN  
20-Dec-2018 20:00:00, NaN  
20-Dec-2018 21:00:00, NaN  
20-Dec-2018 22:00:00, NaN  
20-Dec-2018 23:00:00, NaN  
21-Dec-2018, NaN  
21-Dec-2018 01:00:00, NaN  
21-Dec-2018 02:00:00, NaN  
21-Dec-2018 03:00:00, NaN  
21-Dec-2018 04:00:00, NaN  
21-Dec-2018 05:00:00, NaN  
21-Dec-2018 06:00:00, NaN  
21-Dec-2018 07:00:00, NaN  
21-Dec-2018 08:00:00, NaN  
21-Dec-2018 09:00:00, NaN  
21-Dec-2018 10:00:00, NaN  
21-Dec-2018 11:00:00, NaN  
21-Dec-2018 12:00:00, NaN  
21-Dec-2018 13:00:00, NaN  
21-Dec-2018 14:00:00, NaN  
21-Dec-2018 15:00:00, NaN  
21-Dec-2018 16:00:00, NaN  
21-Dec-2018 17:00:00, NaN  
21-Dec-2018 18:00:00, NaN  
21-Dec-2018 19:00:00, NaN  
21-Dec-2018 20:00:00, NaN  
21-Dec-2018 21:00:00, NaN  
21-Dec-2018 22:00:00, NaN  
21-Dec-2018 23:00:00, NaN  
22-Dec-2018, NaN  
22-Dec-2018 01:00:00, NaN  
22-Dec-2018 02:00:00, NaN  
22-Dec-2018 03:00:00, NaN  
22-Dec-2018 04:00:00, NaN  
22-Dec-2018 05:00:00, NaN  
22-Dec-2018 06:00:00, NaN  
22-Dec-2018 07:00:00, NaN  
22-Dec-2018 08:00:00, NaN  
22-Dec-2018 09:00:00, NaN  
22-Dec-2018 10:00:00, NaN  
22-Dec-2018 11:00:00, NaN  
22-Dec-2018 12:00:00, NaN  
22-Dec-2018 13:00:00, NaN  
22-Dec-2018 14:00:00, NaN  
22-Dec-2018 15:00:00, NaN  
22-Dec-2018 16:00:00, NaN  
22-Dec-2018 17:00:00, NaN  
22-Dec-2018 18:00:00, NaN  
22-Dec-2018 19:00:00, NaN  
22-Dec-2018 20:00:00, NaN  
22-Dec-2018 21:00:00, NaN  
22-Dec-2018 22:00:00, NaN  
22-Dec-2018 23:00:00, NaN  
23-Dec-2018, NaN  
23-Dec-2018 01:00:00, NaN  
23-Dec-2018 02:00:00, NaN  
23-Dec-2018 03:00:00, NaN  
23-Dec-2018 04:00:00, NaN  
23-Dec-2018 05:00:00, NaN  
23-Dec-2018 06:00:00, NaN

23-Dec-2018 07:00:00, NaN  
23-Dec-2018 08:00:00, NaN  
23-Dec-2018 09:00:00, NaN  
23-Dec-2018 10:00:00, NaN  
23-Dec-2018 11:00:00, NaN  
23-Dec-2018 12:00:00, NaN  
23-Dec-2018 13:00:00, NaN  
23-Dec-2018 14:00:00, NaN  
23-Dec-2018 15:00:00, NaN  
23-Dec-2018 16:00:00, NaN  
23-Dec-2018 17:00:00, NaN  
23-Dec-2018 18:00:00, NaN  
23-Dec-2018 19:00:00, NaN  
23-Dec-2018 20:00:00, NaN  
23-Dec-2018 21:00:00, NaN  
23-Dec-2018 22:00:00, NaN  
23-Dec-2018 23:00:00, NaN  
24-Dec-2018, NaN  
24-Dec-2018 01:00:00, NaN  
24-Dec-2018 02:00:00, NaN  
24-Dec-2018 03:00:00, NaN  
24-Dec-2018 04:00:00, NaN  
24-Dec-2018 05:00:00, NaN  
24-Dec-2018 06:00:00, NaN  
24-Dec-2018 07:00:00, NaN  
24-Dec-2018 08:00:00, NaN  
24-Dec-2018 09:00:00, NaN  
24-Dec-2018 10:00:00, NaN  
24-Dec-2018 11:00:00, NaN  
24-Dec-2018 12:00:00, NaN  
24-Dec-2018 13:00:00, NaN  
24-Dec-2018 14:00:00, NaN  
24-Dec-2018 15:00:00, NaN  
24-Dec-2018 16:00:00, NaN  
24-Dec-2018 17:00:00, NaN  
24-Dec-2018 18:00:00, NaN  
24-Dec-2018 19:00:00, NaN  
24-Dec-2018 20:00:00, NaN  
24-Dec-2018 21:00:00, NaN  
24-Dec-2018 22:00:00, NaN  
24-Dec-2018 23:00:00, NaN  
25-Dec-2018, NaN  
25-Dec-2018 01:00:00, NaN  
25-Dec-2018 02:00:00, NaN  
25-Dec-2018 03:00:00, NaN  
25-Dec-2018 04:00:00, NaN  
25-Dec-2018 05:00:00, NaN  
25-Dec-2018 06:00:00, NaN  
25-Dec-2018 07:00:00, NaN  
25-Dec-2018 08:00:00, NaN  
25-Dec-2018 09:00:00, NaN  
25-Dec-2018 10:00:00, NaN  
25-Dec-2018 11:00:00, NaN  
25-Dec-2018 12:00:00, NaN  
25-Dec-2018 13:00:00, NaN  
25-Dec-2018 14:00:00, NaN  
25-Dec-2018 15:00:00, NaN  
25-Dec-2018 16:00:00, NaN  
25-Dec-2018 17:00:00, NaN  
25-Dec-2018 18:00:00, NaN  
25-Dec-2018 19:00:00, NaN  
25-Dec-2018 20:00:00, NaN  
25-Dec-2018 21:00:00, NaN  
25-Dec-2018 22:00:00, NaN

25-Dec-2018 23:00:00, NaN  
26-Dec-2018, NaN  
26-Dec-2018 01:00:00, NaN  
26-Dec-2018 02:00:00, NaN  
26-Dec-2018 03:00:00, NaN  
26-Dec-2018 04:00:00, NaN  
26-Dec-2018 05:00:00, NaN  
26-Dec-2018 06:00:00, NaN  
26-Dec-2018 07:00:00, NaN  
26-Dec-2018 08:00:00, NaN  
26-Dec-2018 09:00:00, NaN  
26-Dec-2018 10:00:00, NaN  
26-Dec-2018 11:00:00, NaN  
26-Dec-2018 12:00:00, NaN  
26-Dec-2018 13:00:00, NaN  
26-Dec-2018 14:00:00, NaN  
26-Dec-2018 15:00:00, NaN  
26-Dec-2018 16:00:00, NaN  
26-Dec-2018 17:00:00, NaN  
26-Dec-2018 18:00:00, NaN  
26-Dec-2018 19:00:00, NaN  
26-Dec-2018 20:00:00, NaN  
26-Dec-2018 21:00:00, NaN  
26-Dec-2018 22:00:00, NaN  
26-Dec-2018 23:00:00, NaN  
27-Dec-2018, NaN  
27-Dec-2018 01:00:00, NaN  
27-Dec-2018 02:00:00, NaN  
27-Dec-2018 03:00:00, NaN  
27-Dec-2018 04:00:00, NaN  
27-Dec-2018 05:00:00, NaN  
27-Dec-2018 06:00:00, NaN  
27-Dec-2018 07:00:00, NaN  
27-Dec-2018 08:00:00, NaN  
27-Dec-2018 09:00:00, NaN  
27-Dec-2018 10:00:00, NaN  
27-Dec-2018 11:00:00, NaN  
27-Dec-2018 12:00:00, NaN  
27-Dec-2018 13:00:00, NaN  
27-Dec-2018 14:00:00, NaN  
27-Dec-2018 15:00:00, NaN  
27-Dec-2018 16:00:00, NaN  
27-Dec-2018 17:00:00, NaN  
27-Dec-2018 18:00:00, NaN  
27-Dec-2018 19:00:00, NaN  
27-Dec-2018 20:00:00, NaN  
27-Dec-2018 21:00:00, NaN  
27-Dec-2018 22:00:00, NaN  
27-Dec-2018 23:00:00, NaN  
28-Dec-2018, NaN  
28-Dec-2018 01:00:00, NaN  
28-Dec-2018 02:00:00, NaN  
28-Dec-2018 03:00:00, NaN  
28-Dec-2018 04:00:00, NaN  
28-Dec-2018 05:00:00, NaN  
28-Dec-2018 06:00:00, NaN  
28-Dec-2018 07:00:00, NaN  
28-Dec-2018 08:00:00, NaN  
28-Dec-2018 09:00:00, NaN  
28-Dec-2018 10:00:00, NaN  
28-Dec-2018 11:00:00, NaN  
28-Dec-2018 12:00:00, NaN  
28-Dec-2018 13:00:00, NaN  
28-Dec-2018 14:00:00, NaN

28-Dec-2018 15:00:00, NaN  
28-Dec-2018 16:00:00, NaN  
28-Dec-2018 17:00:00, NaN  
28-Dec-2018 18:00:00, NaN  
28-Dec-2018 19:00:00, NaN  
28-Dec-2018 20:00:00, NaN  
28-Dec-2018 21:00:00, NaN  
28-Dec-2018 22:00:00, NaN  
28-Dec-2018 23:00:00, NaN  
29-Dec-2018, NaN  
29-Dec-2018 01:00:00, NaN  
29-Dec-2018 02:00:00, NaN  
29-Dec-2018 03:00:00, NaN  
29-Dec-2018 04:00:00, NaN  
29-Dec-2018 05:00:00, NaN  
29-Dec-2018 06:00:00, NaN  
29-Dec-2018 07:00:00, NaN  
29-Dec-2018 08:00:00, NaN  
29-Dec-2018 09:00:00, NaN  
29-Dec-2018 10:00:00, NaN  
29-Dec-2018 11:00:00, NaN  
29-Dec-2018 12:00:00, NaN  
29-Dec-2018 13:00:00, NaN  
29-Dec-2018 14:00:00, NaN  
29-Dec-2018 15:00:00, NaN  
29-Dec-2018 16:00:00, NaN  
29-Dec-2018 17:00:00, NaN  
29-Dec-2018 18:00:00, NaN  
29-Dec-2018 19:00:00, NaN  
29-Dec-2018 20:00:00, NaN  
29-Dec-2018 21:00:00, NaN  
29-Dec-2018 22:00:00, NaN  
29-Dec-2018 23:00:00, NaN  
30-Dec-2018, NaN  
30-Dec-2018 01:00:00, NaN  
30-Dec-2018 02:00:00, NaN  
30-Dec-2018 03:00:00, NaN  
30-Dec-2018 04:00:00, NaN  
30-Dec-2018 05:00:00, NaN  
30-Dec-2018 06:00:00, NaN  
30-Dec-2018 07:00:00, NaN  
30-Dec-2018 08:00:00, NaN  
30-Dec-2018 09:00:00, NaN  
30-Dec-2018 10:00:00, NaN  
30-Dec-2018 11:00:00, NaN  
30-Dec-2018 12:00:00, NaN  
30-Dec-2018 13:00:00, NaN  
30-Dec-2018 14:00:00, NaN  
30-Dec-2018 15:00:00, NaN  
30-Dec-2018 16:00:00, NaN  
30-Dec-2018 17:00:00, NaN  
30-Dec-2018 18:00:00, NaN  
30-Dec-2018 19:00:00, NaN  
30-Dec-2018 20:00:00, NaN  
30-Dec-2018 21:00:00, NaN  
30-Dec-2018 22:00:00, NaN  
30-Dec-2018 23:00:00, NaN  
31-Dec-2018, NaN  
31-Dec-2018 01:00:00, NaN  
31-Dec-2018 02:00:00, NaN  
31-Dec-2018 03:00:00, NaN  
31-Dec-2018 04:00:00, NaN  
31-Dec-2018 05:00:00, NaN  
31-Dec-2018 06:00:00, NaN

31-Dec-2018 07:00:00, NaN  
31-Dec-2018 08:00:00, NaN  
31-Dec-2018 09:00:00, NaN  
31-Dec-2018 10:00:00, NaN  
31-Dec-2018 11:00:00, NaN  
31-Dec-2018 12:00:00, NaN  
31-Dec-2018 13:00:00, NaN  
31-Dec-2018 14:00:00, NaN  
31-Dec-2018 15:00:00, NaN  
31-Dec-2018 16:00:00, NaN  
31-Dec-2018 17:00:00, NaN  
31-Dec-2018 18:00:00, NaN  
31-Dec-2018 19:00:00, NaN  
31-Dec-2018 20:00:00, NaN  
31-Dec-2018 21:00:00, NaN  
31-Dec-2018 22:00:00, NaN  
31-Dec-2018 23:00:00, NaN  
01-Jan-2019, NaN  
01-Jan-2019 01:00:00, NaN  
01-Jan-2019 02:00:00, NaN  
01-Jan-2019 03:00:00, NaN  
01-Jan-2019 04:00:00, NaN  
01-Jan-2019 05:00:00, NaN  
01-Jan-2019 06:00:00, NaN  
01-Jan-2019 07:00:00, NaN  
01-Jan-2019 08:00:00, NaN  
01-Jan-2019 09:00:00, NaN  
01-Jan-2019 10:00:00, NaN  
01-Jan-2019 11:00:00, NaN  
01-Jan-2019 12:00:00, NaN  
01-Jan-2019 13:00:00, NaN  
01-Jan-2019 14:00:00, NaN  
01-Jan-2019 15:00:00, NaN  
01-Jan-2019 16:00:00, NaN  
01-Jan-2019 17:00:00, NaN  
01-Jan-2019 18:00:00, NaN  
01-Jan-2019 19:00:00, NaN  
01-Jan-2019 20:00:00, NaN  
01-Jan-2019 21:00:00, NaN  
01-Jan-2019 22:00:00, NaN  
01-Jan-2019 23:00:00, NaN  
02-Jan-2019, NaN  
02-Jan-2019 01:00:00, NaN  
02-Jan-2019 02:00:00, NaN  
02-Jan-2019 03:00:00, NaN  
02-Jan-2019 04:00:00, NaN  
02-Jan-2019 05:00:00, NaN  
02-Jan-2019 06:00:00, NaN  
02-Jan-2019 07:00:00, NaN  
02-Jan-2019 08:00:00, NaN  
02-Jan-2019 09:00:00, NaN  
02-Jan-2019 10:00:00, NaN  
02-Jan-2019 11:00:00, NaN  
02-Jan-2019 12:00:00, NaN  
02-Jan-2019 13:00:00, NaN  
02-Jan-2019 14:00:00, NaN  
02-Jan-2019 15:00:00, NaN  
02-Jan-2019 16:00:00, NaN  
02-Jan-2019 17:00:00, NaN  
02-Jan-2019 18:00:00, NaN  
02-Jan-2019 19:00:00, NaN  
02-Jan-2019 20:00:00, NaN  
02-Jan-2019 21:00:00, NaN  
02-Jan-2019 22:00:00, NaN

02-Jan-2019 23:00:00, NaN  
03-Jan-2019, NaN  
03-Jan-2019 01:00:00, NaN  
03-Jan-2019 02:00:00, NaN  
03-Jan-2019 03:00:00, NaN  
03-Jan-2019 04:00:00, NaN  
03-Jan-2019 05:00:00, NaN  
03-Jan-2019 06:00:00, NaN  
03-Jan-2019 07:00:00, NaN  
03-Jan-2019 08:00:00, NaN  
03-Jan-2019 09:00:00, NaN  
03-Jan-2019 10:00:00, NaN  
03-Jan-2019 11:00:00, NaN  
03-Jan-2019 12:00:00, NaN  
03-Jan-2019 13:00:00, NaN  
03-Jan-2019 14:00:00, NaN  
03-Jan-2019 15:00:00, NaN  
03-Jan-2019 16:00:00, NaN  
03-Jan-2019 17:00:00, NaN  
03-Jan-2019 18:00:00, NaN  
03-Jan-2019 19:00:00, NaN  
03-Jan-2019 20:00:00, NaN  
03-Jan-2019 21:00:00, NaN  
03-Jan-2019 22:00:00, NaN  
03-Jan-2019 23:00:00, NaN  
04-Jan-2019, NaN  
04-Jan-2019 01:00:00, NaN  
04-Jan-2019 02:00:00, NaN  
04-Jan-2019 03:00:00, NaN  
04-Jan-2019 04:00:00, NaN  
04-Jan-2019 05:00:00, NaN  
04-Jan-2019 06:00:00, NaN  
04-Jan-2019 07:00:00, NaN  
04-Jan-2019 08:00:00, NaN  
04-Jan-2019 09:00:00, NaN  
04-Jan-2019 10:00:00, NaN  
04-Jan-2019 11:00:00, NaN  
04-Jan-2019 12:00:00, NaN  
04-Jan-2019 13:00:00, NaN  
04-Jan-2019 14:00:00, NaN  
04-Jan-2019 15:00:00, NaN  
04-Jan-2019 16:00:00, NaN  
04-Jan-2019 17:00:00, NaN  
04-Jan-2019 18:00:00, NaN  
04-Jan-2019 19:00:00, NaN  
04-Jan-2019 20:00:00, NaN  
04-Jan-2019 21:00:00, NaN  
04-Jan-2019 22:00:00, NaN  
04-Jan-2019 23:00:00, NaN  
05-Jan-2019, NaN  
05-Jan-2019 01:00:00, NaN  
05-Jan-2019 02:00:00, NaN  
05-Jan-2019 03:00:00, NaN  
05-Jan-2019 04:00:00, NaN  
05-Jan-2019 05:00:00, NaN  
05-Jan-2019 06:00:00, NaN  
05-Jan-2019 07:00:00, NaN  
05-Jan-2019 08:00:00, NaN  
05-Jan-2019 09:00:00, NaN  
05-Jan-2019 10:00:00, NaN  
05-Jan-2019 11:00:00, NaN  
05-Jan-2019 12:00:00, NaN  
05-Jan-2019 13:00:00, NaN  
05-Jan-2019 14:00:00, NaN

05-Jan-2019 15:00:00, NaN  
05-Jan-2019 16:00:00, NaN  
05-Jan-2019 17:00:00, NaN  
05-Jan-2019 18:00:00, NaN  
05-Jan-2019 19:00:00, NaN  
05-Jan-2019 20:00:00, NaN  
05-Jan-2019 21:00:00, NaN  
05-Jan-2019 22:00:00, NaN  
05-Jan-2019 23:00:00, NaN  
06-Jan-2019, NaN  
06-Jan-2019 01:00:00, NaN  
06-Jan-2019 02:00:00, NaN  
06-Jan-2019 03:00:00, NaN  
06-Jan-2019 04:00:00, NaN  
06-Jan-2019 05:00:00, NaN  
06-Jan-2019 06:00:00, NaN  
06-Jan-2019 07:00:00, NaN  
06-Jan-2019 08:00:00, NaN  
06-Jan-2019 09:00:00, NaN  
06-Jan-2019 10:00:00, NaN  
06-Jan-2019 11:00:00, NaN  
06-Jan-2019 12:00:00, NaN  
06-Jan-2019 13:00:00, NaN  
06-Jan-2019 14:00:00, NaN  
06-Jan-2019 15:00:00, NaN  
06-Jan-2019 16:00:00, NaN  
06-Jan-2019 17:00:00, NaN  
06-Jan-2019 18:00:00, NaN  
06-Jan-2019 19:00:00, NaN  
06-Jan-2019 20:00:00, NaN  
06-Jan-2019 21:00:00, NaN  
06-Jan-2019 22:00:00, NaN  
06-Jan-2019 23:00:00, NaN  
07-Jan-2019, NaN  
07-Jan-2019 01:00:00, NaN  
07-Jan-2019 02:00:00, NaN  
07-Jan-2019 03:00:00, NaN  
07-Jan-2019 04:00:00, NaN  
07-Jan-2019 05:00:00, NaN  
07-Jan-2019 06:00:00, NaN  
07-Jan-2019 07:00:00, NaN  
07-Jan-2019 08:00:00, NaN  
07-Jan-2019 09:00:00, NaN  
07-Jan-2019 10:00:00, NaN  
07-Jan-2019 11:00:00, NaN  
07-Jan-2019 12:00:00, NaN  
07-Jan-2019 13:00:00, NaN  
07-Jan-2019 14:00:00, NaN  
07-Jan-2019 15:00:00, NaN  
07-Jan-2019 16:00:00, NaN  
07-Jan-2019 17:00:00, NaN  
07-Jan-2019 18:00:00, NaN  
07-Jan-2019 19:00:00, NaN  
07-Jan-2019 20:00:00, NaN  
07-Jan-2019 21:00:00, NaN  
07-Jan-2019 22:00:00, NaN  
07-Jan-2019 23:00:00, NaN  
08-Jan-2019, NaN  
08-Jan-2019 01:00:00, NaN  
08-Jan-2019 02:00:00, NaN  
08-Jan-2019 03:00:00, NaN  
08-Jan-2019 04:00:00, NaN  
08-Jan-2019 05:00:00, NaN  
08-Jan-2019 06:00:00, NaN

08-Jan-2019 07:00:00, NaN  
08-Jan-2019 08:00:00, NaN  
08-Jan-2019 09:00:00, NaN  
08-Jan-2019 10:00:00, NaN  
08-Jan-2019 11:00:00, NaN  
08-Jan-2019 12:00:00, NaN  
08-Jan-2019 13:00:00, NaN  
08-Jan-2019 14:00:00, NaN  
08-Jan-2019 15:00:00, NaN  
08-Jan-2019 16:00:00, NaN  
08-Jan-2019 17:00:00, NaN  
08-Jan-2019 18:00:00, NaN  
08-Jan-2019 19:00:00, NaN  
08-Jan-2019 20:00:00, NaN  
08-Jan-2019 21:00:00, NaN  
08-Jan-2019 22:00:00, NaN  
08-Jan-2019 23:00:00, NaN  
09-Jan-2019, NaN  
09-Jan-2019 01:00:00, NaN  
09-Jan-2019 02:00:00, NaN  
09-Jan-2019 03:00:00, NaN  
09-Jan-2019 04:00:00, NaN  
09-Jan-2019 05:00:00, NaN  
09-Jan-2019 06:00:00, NaN  
09-Jan-2019 07:00:00, NaN  
09-Jan-2019 08:00:00, NaN  
09-Jan-2019 09:00:00, NaN  
09-Jan-2019 10:00:00, NaN  
09-Jan-2019 11:00:00, NaN  
09-Jan-2019 12:00:00, NaN  
09-Jan-2019 13:00:00, NaN  
09-Jan-2019 14:00:00, NaN  
09-Jan-2019 15:00:00, NaN  
09-Jan-2019 16:00:00, NaN  
09-Jan-2019 17:00:00, NaN  
09-Jan-2019 18:00:00, NaN  
09-Jan-2019 19:00:00, NaN  
09-Jan-2019 20:00:00, NaN  
09-Jan-2019 21:00:00, NaN  
09-Jan-2019 22:00:00, NaN  
09-Jan-2019 23:00:00, NaN  
10-Jan-2019, NaN  
10-Jan-2019 01:00:00, NaN  
10-Jan-2019 02:00:00, NaN  
10-Jan-2019 03:00:00, NaN  
10-Jan-2019 04:00:00, NaN  
10-Jan-2019 05:00:00, NaN  
10-Jan-2019 06:00:00, NaN  
10-Jan-2019 07:00:00, NaN  
10-Jan-2019 08:00:00, NaN  
10-Jan-2019 09:00:00, NaN  
10-Jan-2019 10:00:00, NaN  
10-Jan-2019 11:00:00, NaN  
10-Jan-2019 12:00:00, NaN  
10-Jan-2019 13:00:00, NaN  
10-Jan-2019 14:00:00, NaN  
10-Jan-2019 15:00:00, NaN  
10-Jan-2019 16:00:00, NaN  
10-Jan-2019 17:00:00, NaN  
10-Jan-2019 18:00:00, NaN  
10-Jan-2019 19:00:00, NaN  
10-Jan-2019 20:00:00, NaN  
10-Jan-2019 21:00:00, NaN  
10-Jan-2019 22:00:00, NaN



10-Jan-2019 23:00:00, NaN  
11-Jan-2019, NaN  
11-Jan-2019 01:00:00, NaN  
11-Jan-2019 02:00:00, NaN  
11-Jan-2019 03:00:00, NaN  
11-Jan-2019 04:00:00, NaN  
11-Jan-2019 05:00:00, NaN  
11-Jan-2019 06:00:00, NaN  
11-Jan-2019 07:00:00, NaN  
11-Jan-2019 08:00:00, NaN  
11-Jan-2019 09:00:00, NaN  
11-Jan-2019 10:00:00, NaN  
11-Jan-2019 11:00:00, NaN  
11-Jan-2019 12:00:00, NaN  
11-Jan-2019 13:00:00, NaN  
11-Jan-2019 14:00:00, NaN  
11-Jan-2019 15:00:00, NaN  
11-Jan-2019 16:00:00, NaN  
11-Jan-2019 17:00:00, NaN  
11-Jan-2019 18:00:00, NaN  
11-Jan-2019 19:00:00, NaN  
11-Jan-2019 20:00:00, NaN  
11-Jan-2019 21:00:00, NaN  
11-Jan-2019 22:00:00, NaN  
11-Jan-2019 23:00:00, NaN  
12-Jan-2019, NaN  
12-Jan-2019 01:00:00, NaN  
12-Jan-2019 02:00:00, NaN  
12-Jan-2019 03:00:00, NaN  
12-Jan-2019 04:00:00, NaN  
12-Jan-2019 05:00:00, NaN  
12-Jan-2019 06:00:00, NaN  
12-Jan-2019 07:00:00, NaN  
12-Jan-2019 08:00:00, NaN  
12-Jan-2019 09:00:00, NaN  
12-Jan-2019 10:00:00, NaN  
12-Jan-2019 11:00:00, NaN  
12-Jan-2019 12:00:00, NaN  
12-Jan-2019 13:00:00, NaN  
12-Jan-2019 14:00:00, NaN  
12-Jan-2019 15:00:00, NaN  
12-Jan-2019 16:00:00, NaN  
12-Jan-2019 17:00:00, NaN  
12-Jan-2019 18:00:00, NaN  
12-Jan-2019 19:00:00, NaN  
12-Jan-2019 20:00:00, NaN  
12-Jan-2019 21:00:00, NaN  
12-Jan-2019 22:00:00, NaN  
12-Jan-2019 23:00:00, NaN  
13-Jan-2019, NaN  
13-Jan-2019 01:00:00, NaN  
13-Jan-2019 02:00:00, NaN  
13-Jan-2019 03:00:00, NaN  
13-Jan-2019 04:00:00, NaN  
13-Jan-2019 05:00:00, NaN  
13-Jan-2019 06:00:00, NaN  
13-Jan-2019 07:00:00, NaN  
13-Jan-2019 08:00:00, NaN  
13-Jan-2019 09:00:00, NaN  
13-Jan-2019 10:00:00, NaN  
13-Jan-2019 11:00:00, NaN  
13-Jan-2019 12:00:00, NaN  
13-Jan-2019 13:00:00, NaN  
13-Jan-2019 14:00:00, NaN

13-Jan-2019 15:00:00, NaN  
13-Jan-2019 16:00:00, NaN  
13-Jan-2019 17:00:00, NaN  
13-Jan-2019 18:00:00, NaN  
13-Jan-2019 19:00:00, NaN  
13-Jan-2019 20:00:00, NaN  
13-Jan-2019 21:00:00, NaN  
13-Jan-2019 22:00:00, NaN  
13-Jan-2019 23:00:00, NaN  
14-Jan-2019, NaN  
14-Jan-2019 01:00:00, NaN  
14-Jan-2019 02:00:00, NaN  
14-Jan-2019 03:00:00, NaN  
14-Jan-2019 04:00:00, NaN  
14-Jan-2019 05:00:00, NaN  
14-Jan-2019 06:00:00, NaN  
14-Jan-2019 07:00:00, NaN  
14-Jan-2019 08:00:00, NaN  
14-Jan-2019 09:00:00, NaN  
14-Jan-2019 10:00:00, NaN  
14-Jan-2019 11:00:00, NaN  
14-Jan-2019 12:00:00, NaN  
14-Jan-2019 13:00:00, NaN  
14-Jan-2019 14:00:00, NaN  
14-Jan-2019 15:00:00, NaN  
14-Jan-2019 16:00:00, NaN  
14-Jan-2019 17:00:00, NaN  
14-Jan-2019 18:00:00, NaN  
14-Jan-2019 19:00:00, NaN  
14-Jan-2019 20:00:00, NaN  
14-Jan-2019 21:00:00, NaN  
14-Jan-2019 22:00:00, NaN  
14-Jan-2019 23:00:00, NaN  
15-Jan-2019, NaN  
15-Jan-2019 01:00:00, NaN  
15-Jan-2019 02:00:00, NaN  
15-Jan-2019 03:00:00, NaN  
15-Jan-2019 04:00:00, NaN  
15-Jan-2019 05:00:00, NaN  
15-Jan-2019 06:00:00, NaN  
15-Jan-2019 07:00:00, NaN  
15-Jan-2019 08:00:00, NaN  
15-Jan-2019 09:00:00, NaN  
15-Jan-2019 10:00:00, NaN  
15-Jan-2019 11:00:00, NaN  
15-Jan-2019 12:00:00, NaN  
15-Jan-2019 13:00:00, NaN  
15-Jan-2019 14:00:00, NaN  
15-Jan-2019 15:00:00, NaN  
15-Jan-2019 16:00:00, NaN  
15-Jan-2019 17:00:00, NaN  
15-Jan-2019 18:00:00, NaN  
15-Jan-2019 19:00:00, NaN  
15-Jan-2019 20:00:00, NaN  
15-Jan-2019 21:00:00, NaN  
15-Jan-2019 22:00:00, NaN  
15-Jan-2019 23:00:00, NaN  
16-Jan-2019, NaN  
16-Jan-2019 01:00:00, NaN  
16-Jan-2019 02:00:00, NaN  
16-Jan-2019 03:00:00, NaN  
16-Jan-2019 04:00:00, NaN  
16-Jan-2019 05:00:00, NaN  
16-Jan-2019 06:00:00, NaN

|              |           |     |
|--------------|-----------|-----|
| 16-Jan-2019  | 07:00:00, | NaN |
| 16-Jan-2019  | 08:00:00, | NaN |
| 16-Jan-2019  | 09:00:00, | NaN |
| 16-Jan-2019  | 10:00:00, | NaN |
| 16-Jan-2019  | 11:00:00, | NaN |
| 16-Jan-2019  | 12:00:00, | NaN |
| 16-Jan-2019  | 13:00:00, | NaN |
| 16-Jan-2019  | 14:00:00, | NaN |
| 16-Jan-2019  | 15:00:00, | NaN |
| 16-Jan-2019  | 16:00:00, | NaN |
| 16-Jan-2019  | 17:00:00, | NaN |
| 16-Jan-2019  | 18:00:00, | NaN |
| 16-Jan-2019  | 19:00:00, | NaN |
| 16-Jan-2019  | 20:00:00, | NaN |
| 16-Jan-2019  | 21:00:00, | NaN |
| 16-Jan-2019  | 22:00:00, | NaN |
| 16-Jan-2019  | 23:00:00, | NaN |
| 17-Jan-2019, | NaN       |     |
| 17-Jan-2019  | 01:00:00, | NaN |
| 17-Jan-2019  | 02:00:00, | NaN |
| 17-Jan-2019  | 03:00:00, | NaN |
| 17-Jan-2019  | 04:00:00, | NaN |
| 17-Jan-2019  | 05:00:00, | NaN |
| 17-Jan-2019  | 06:00:00, | NaN |
| 17-Jan-2019  | 07:00:00, | NaN |
| 17-Jan-2019  | 08:00:00, | NaN |
| 17-Jan-2019  | 09:00:00, | NaN |
| 17-Jan-2019  | 10:00:00, | NaN |
| 17-Jan-2019  | 11:00:00, | NaN |
| 17-Jan-2019  | 12:00:00, | NaN |
| 17-Jan-2019  | 13:00:00, | NaN |
| 17-Jan-2019  | 14:00:00, | NaN |
| 17-Jan-2019  | 15:00:00, | NaN |
| 17-Jan-2019  | 16:00:00, | NaN |
| 17-Jan-2019  | 17:00:00, | NaN |
| 17-Jan-2019  | 18:00:00, | NaN |
| 17-Jan-2019  | 19:00:00, | NaN |
| 17-Jan-2019  | 20:00:00, | NaN |
| 17-Jan-2019  | 21:00:00, | NaN |
| 17-Jan-2019  | 22:00:00, | NaN |
| 17-Jan-2019  | 23:00:00, | NaN |
| 18-Jan-2019, | NaN       |     |
| 18-Jan-2019  | 01:00:00, | NaN |
| 18-Jan-2019  | 02:00:00, | NaN |
| 18-Jan-2019  | 03:00:00, | NaN |
| 18-Jan-2019  | 04:00:00, | NaN |
| 18-Jan-2019  | 05:00:00, | NaN |
| 18-Jan-2019  | 06:00:00, | NaN |
| 18-Jan-2019  | 07:00:00, | NaN |
| 18-Jan-2019  | 08:00:00, | NaN |
| 18-Jan-2019  | 09:00:00, | NaN |
| 18-Jan-2019  | 10:00:00, | NaN |
| 18-Jan-2019  | 11:00:00, | NaN |
| 18-Jan-2019  | 12:00:00, | NaN |
| 18-Jan-2019  | 13:00:00, | NaN |
| 18-Jan-2019  | 14:00:00, | NaN |
| 18-Jan-2019  | 15:00:00, | NaN |
| 18-Jan-2019  | 16:00:00, | NaN |
| 18-Jan-2019  | 17:00:00, | NaN |
| 18-Jan-2019  | 18:00:00, | NaN |
| 18-Jan-2019  | 19:00:00, | NaN |
| 18-Jan-2019  | 20:00:00, | NaN |
| 18-Jan-2019  | 21:00:00, | NaN |
| 18-Jan-2019  | 22:00:00, | NaN |

18-Jan-2019 23:00:00, NaN  
19-Jan-2019, NaN  
19-Jan-2019 01:00:00, NaN  
19-Jan-2019 02:00:00, NaN  
19-Jan-2019 03:00:00, NaN  
19-Jan-2019 04:00:00, NaN  
19-Jan-2019 05:00:00, NaN  
19-Jan-2019 06:00:00, NaN  
19-Jan-2019 07:00:00, NaN  
19-Jan-2019 08:00:00, NaN  
19-Jan-2019 09:00:00, NaN  
19-Jan-2019 10:00:00, NaN  
19-Jan-2019 11:00:00, NaN  
19-Jan-2019 12:00:00, NaN  
19-Jan-2019 13:00:00, NaN  
19-Jan-2019 14:00:00, NaN  
19-Jan-2019 15:00:00, NaN  
19-Jan-2019 16:00:00, NaN  
19-Jan-2019 17:00:00, NaN  
19-Jan-2019 18:00:00, NaN  
19-Jan-2019 19:00:00, NaN  
19-Jan-2019 20:00:00, NaN  
19-Jan-2019 21:00:00, NaN  
19-Jan-2019 22:00:00, NaN  
19-Jan-2019 23:00:00, NaN  
20-Jan-2019, NaN  
20-Jan-2019 01:00:00, NaN  
20-Jan-2019 02:00:00, NaN  
20-Jan-2019 03:00:00, NaN  
20-Jan-2019 04:00:00, NaN  
20-Jan-2019 05:00:00, NaN  
20-Jan-2019 06:00:00, NaN  
20-Jan-2019 07:00:00, NaN  
20-Jan-2019 08:00:00, NaN  
20-Jan-2019 09:00:00, NaN  
20-Jan-2019 10:00:00, NaN  
20-Jan-2019 11:00:00, NaN  
20-Jan-2019 12:00:00, NaN  
20-Jan-2019 13:00:00, NaN  
20-Jan-2019 14:00:00, NaN  
20-Jan-2019 15:00:00, NaN  
20-Jan-2019 16:00:00, NaN  
20-Jan-2019 17:00:00, NaN  
20-Jan-2019 18:00:00, NaN  
20-Jan-2019 19:00:00, NaN  
20-Jan-2019 20:00:00, NaN  
20-Jan-2019 21:00:00, NaN  
20-Jan-2019 22:00:00, NaN  
20-Jan-2019 23:00:00, NaN  
21-Jan-2019, NaN  
21-Jan-2019 01:00:00, NaN  
21-Jan-2019 02:00:00, NaN  
21-Jan-2019 03:00:00, NaN  
21-Jan-2019 04:00:00, NaN  
21-Jan-2019 05:00:00, NaN  
21-Jan-2019 06:00:00, NaN  
21-Jan-2019 07:00:00, NaN  
21-Jan-2019 08:00:00, NaN  
21-Jan-2019 09:00:00, NaN  
21-Jan-2019 10:00:00, NaN  
21-Jan-2019 11:00:00, NaN  
21-Jan-2019 12:00:00, NaN  
21-Jan-2019 13:00:00, NaN  
21-Jan-2019 14:00:00, NaN

21-Jan-2019 15:00:00, NaN  
21-Jan-2019 16:00:00, NaN  
21-Jan-2019 17:00:00, NaN  
21-Jan-2019 18:00:00, NaN  
21-Jan-2019 19:00:00, NaN  
21-Jan-2019 20:00:00, NaN  
21-Jan-2019 21:00:00, NaN  
21-Jan-2019 22:00:00, NaN  
21-Jan-2019 23:00:00, NaN  
22-Jan-2019, NaN  
22-Jan-2019 01:00:00, NaN  
22-Jan-2019 02:00:00, NaN  
22-Jan-2019 03:00:00, NaN  
22-Jan-2019 04:00:00, NaN  
22-Jan-2019 05:00:00, NaN  
22-Jan-2019 06:00:00, NaN  
22-Jan-2019 07:00:00, NaN  
22-Jan-2019 08:00:00, NaN  
22-Jan-2019 09:00:00, NaN  
22-Jan-2019 10:00:00, NaN  
22-Jan-2019 11:00:00, NaN  
22-Jan-2019 12:00:00, NaN  
22-Jan-2019 13:00:00, NaN  
22-Jan-2019 14:00:00, NaN  
22-Jan-2019 15:00:00, NaN  
22-Jan-2019 16:00:00, NaN  
22-Jan-2019 17:00:00, NaN  
22-Jan-2019 18:00:00, NaN  
22-Jan-2019 19:00:00, NaN  
22-Jan-2019 20:00:00, NaN  
22-Jan-2019 21:00:00, NaN  
22-Jan-2019 22:00:00, NaN  
22-Jan-2019 23:00:00, NaN  
23-Jan-2019, NaN  
23-Jan-2019 01:00:00, NaN  
23-Jan-2019 02:00:00, NaN  
23-Jan-2019 03:00:00, NaN  
23-Jan-2019 04:00:00, NaN  
23-Jan-2019 05:00:00, NaN  
23-Jan-2019 06:00:00, NaN  
23-Jan-2019 07:00:00, NaN  
23-Jan-2019 08:00:00, NaN  
23-Jan-2019 09:00:00, NaN  
23-Jan-2019 10:00:00, NaN  
23-Jan-2019 11:00:00, NaN  
23-Jan-2019 12:00:00, NaN  
23-Jan-2019 13:00:00, NaN  
23-Jan-2019 14:00:00, NaN  
23-Jan-2019 15:00:00, NaN  
23-Jan-2019 16:00:00, NaN  
23-Jan-2019 17:00:00, NaN  
23-Jan-2019 18:00:00, NaN  
23-Jan-2019 19:00:00, NaN  
23-Jan-2019 20:00:00, NaN  
23-Jan-2019 21:00:00, NaN  
23-Jan-2019 22:00:00, NaN  
23-Jan-2019 23:00:00, NaN  
24-Jan-2019, NaN  
24-Jan-2019 01:00:00, NaN  
24-Jan-2019 02:00:00, NaN  
24-Jan-2019 03:00:00, NaN  
24-Jan-2019 04:00:00, NaN  
24-Jan-2019 05:00:00, NaN  
24-Jan-2019 06:00:00, NaN

|              |           |     |
|--------------|-----------|-----|
| 24-Jan-2019  | 07:00:00, | NaN |
| 24-Jan-2019  | 08:00:00, | NaN |
| 24-Jan-2019  | 09:00:00, | NaN |
| 24-Jan-2019  | 10:00:00, | NaN |
| 24-Jan-2019  | 11:00:00, | NaN |
| 24-Jan-2019  | 12:00:00, | NaN |
| 24-Jan-2019  | 13:00:00, | NaN |
| 24-Jan-2019  | 14:00:00, | NaN |
| 24-Jan-2019  | 15:00:00, | NaN |
| 24-Jan-2019  | 16:00:00, | NaN |
| 24-Jan-2019  | 17:00:00, | NaN |
| 24-Jan-2019  | 18:00:00, | NaN |
| 24-Jan-2019  | 19:00:00, | NaN |
| 24-Jan-2019  | 20:00:00, | NaN |
| 24-Jan-2019  | 21:00:00, | NaN |
| 24-Jan-2019  | 22:00:00, | NaN |
| 24-Jan-2019  | 23:00:00, | NaN |
| 25-Jan-2019, | NaN       |     |
| 25-Jan-2019  | 01:00:00, | NaN |
| 25-Jan-2019  | 02:00:00, | NaN |
| 25-Jan-2019  | 03:00:00, | NaN |
| 25-Jan-2019  | 04:00:00, | NaN |
| 25-Jan-2019  | 05:00:00, | NaN |
| 25-Jan-2019  | 06:00:00, | NaN |
| 25-Jan-2019  | 07:00:00, | NaN |
| 25-Jan-2019  | 08:00:00, | NaN |
| 25-Jan-2019  | 09:00:00, | NaN |
| 25-Jan-2019  | 10:00:00, | NaN |
| 25-Jan-2019  | 11:00:00, | NaN |
| 25-Jan-2019  | 12:00:00, | NaN |
| 25-Jan-2019  | 13:00:00, | NaN |
| 25-Jan-2019  | 14:00:00, | NaN |
| 25-Jan-2019  | 15:00:00, | NaN |
| 25-Jan-2019  | 16:00:00, | NaN |
| 25-Jan-2019  | 17:00:00, | NaN |
| 25-Jan-2019  | 18:00:00, | NaN |
| 25-Jan-2019  | 19:00:00, | NaN |
| 25-Jan-2019  | 20:00:00, | NaN |
| 25-Jan-2019  | 21:00:00, | NaN |
| 25-Jan-2019  | 22:00:00, | NaN |
| 25-Jan-2019  | 23:00:00, | NaN |
| 26-Jan-2019, | NaN       |     |
| 26-Jan-2019  | 01:00:00, | NaN |
| 26-Jan-2019  | 02:00:00, | NaN |
| 26-Jan-2019  | 03:00:00, | NaN |
| 26-Jan-2019  | 04:00:00, | NaN |
| 26-Jan-2019  | 05:00:00, | NaN |
| 26-Jan-2019  | 06:00:00, | NaN |
| 26-Jan-2019  | 07:00:00, | NaN |
| 26-Jan-2019  | 08:00:00, | NaN |
| 26-Jan-2019  | 09:00:00, | NaN |
| 26-Jan-2019  | 10:00:00, | NaN |
| 26-Jan-2019  | 11:00:00, | NaN |
| 26-Jan-2019  | 12:00:00, | NaN |
| 26-Jan-2019  | 13:00:00, | NaN |
| 26-Jan-2019  | 14:00:00, | NaN |
| 26-Jan-2019  | 15:00:00, | NaN |
| 26-Jan-2019  | 16:00:00, | NaN |
| 26-Jan-2019  | 17:00:00, | NaN |
| 26-Jan-2019  | 18:00:00, | NaN |
| 26-Jan-2019  | 19:00:00, | NaN |
| 26-Jan-2019  | 20:00:00, | NaN |
| 26-Jan-2019  | 21:00:00, | NaN |
| 26-Jan-2019  | 22:00:00, | NaN |

26-Jan-2019 23:00:00, NaN  
27-Jan-2019, NaN  
27-Jan-2019 01:00:00, NaN  
27-Jan-2019 02:00:00, NaN  
27-Jan-2019 03:00:00, NaN  
27-Jan-2019 04:00:00, NaN  
27-Jan-2019 05:00:00, NaN  
27-Jan-2019 06:00:00, NaN  
27-Jan-2019 07:00:00, NaN  
27-Jan-2019 08:00:00, NaN  
27-Jan-2019 09:00:00, NaN  
27-Jan-2019 10:00:00, NaN  
27-Jan-2019 11:00:00, NaN  
27-Jan-2019 12:00:00, NaN  
27-Jan-2019 13:00:00, NaN  
27-Jan-2019 14:00:00, NaN  
27-Jan-2019 15:00:00, NaN  
27-Jan-2019 16:00:00, NaN  
27-Jan-2019 17:00:00, NaN  
27-Jan-2019 18:00:00, NaN  
27-Jan-2019 19:00:00, NaN  
27-Jan-2019 20:00:00, NaN  
27-Jan-2019 21:00:00, NaN  
27-Jan-2019 22:00:00, NaN  
27-Jan-2019 23:00:00, NaN  
28-Jan-2019, NaN  
28-Jan-2019 01:00:00, NaN  
28-Jan-2019 02:00:00, NaN  
28-Jan-2019 03:00:00, NaN  
28-Jan-2019 04:00:00, NaN  
28-Jan-2019 05:00:00, NaN  
28-Jan-2019 06:00:00, NaN  
28-Jan-2019 07:00:00, NaN  
28-Jan-2019 08:00:00, NaN  
28-Jan-2019 09:00:00, NaN  
28-Jan-2019 10:00:00, NaN  
28-Jan-2019 11:00:00, NaN  
28-Jan-2019 12:00:00, NaN  
28-Jan-2019 13:00:00, NaN  
28-Jan-2019 14:00:00, NaN  
28-Jan-2019 15:00:00, NaN  
28-Jan-2019 16:00:00, NaN  
28-Jan-2019 17:00:00, NaN  
28-Jan-2019 18:00:00, NaN  
28-Jan-2019 19:00:00, NaN  
28-Jan-2019 20:00:00, NaN  
28-Jan-2019 21:00:00, NaN  
28-Jan-2019 22:00:00, NaN  
28-Jan-2019 23:00:00, NaN  
29-Jan-2019, NaN  
29-Jan-2019 01:00:00, NaN  
29-Jan-2019 02:00:00, NaN  
29-Jan-2019 03:00:00, NaN  
29-Jan-2019 04:00:00, NaN  
29-Jan-2019 05:00:00, NaN  
29-Jan-2019 06:00:00, NaN  
29-Jan-2019 07:00:00, NaN  
29-Jan-2019 08:00:00, NaN  
29-Jan-2019 09:00:00, NaN  
29-Jan-2019 10:00:00, NaN  
29-Jan-2019 11:00:00, NaN  
29-Jan-2019 12:00:00, NaN  
29-Jan-2019 13:00:00, NaN  
29-Jan-2019 14:00:00, NaN

29-Jan-2019 15:00:00, NaN  
29-Jan-2019 16:00:00, NaN  
29-Jan-2019 17:00:00, NaN  
29-Jan-2019 18:00:00, NaN  
29-Jan-2019 19:00:00, NaN  
29-Jan-2019 20:00:00, NaN  
29-Jan-2019 21:00:00, NaN  
29-Jan-2019 22:00:00, NaN  
29-Jan-2019 23:00:00, NaN  
30-Jan-2019, NaN  
30-Jan-2019 01:00:00, NaN  
30-Jan-2019 02:00:00, NaN  
30-Jan-2019 03:00:00, NaN  
30-Jan-2019 04:00:00, NaN  
30-Jan-2019 05:00:00, NaN  
30-Jan-2019 06:00:00, NaN  
30-Jan-2019 07:00:00, NaN  
30-Jan-2019 08:00:00, NaN  
30-Jan-2019 09:00:00, NaN  
30-Jan-2019 10:00:00, NaN  
30-Jan-2019 11:00:00, NaN  
30-Jan-2019 12:00:00, NaN  
30-Jan-2019 13:00:00, NaN  
30-Jan-2019 14:00:00, NaN  
30-Jan-2019 15:00:00, NaN  
30-Jan-2019 16:00:00, NaN  
30-Jan-2019 17:00:00, NaN  
30-Jan-2019 18:00:00, NaN  
30-Jan-2019 19:00:00, NaN  
30-Jan-2019 20:00:00, NaN  
30-Jan-2019 21:00:00, NaN  
30-Jan-2019 22:00:00, NaN  
30-Jan-2019 23:00:00, NaN  
31-Jan-2019, NaN  
31-Jan-2019 01:00:00, NaN  
31-Jan-2019 02:00:00, NaN  
31-Jan-2019 03:00:00, NaN  
31-Jan-2019 04:00:00, NaN  
31-Jan-2019 05:00:00, NaN  
31-Jan-2019 06:00:00, NaN  
31-Jan-2019 07:00:00, NaN  
31-Jan-2019 08:00:00, NaN  
31-Jan-2019 09:00:00, NaN  
31-Jan-2019 10:00:00, NaN  
31-Jan-2019 11:00:00, NaN  
31-Jan-2019 12:00:00, NaN  
31-Jan-2019 13:00:00, NaN  
31-Jan-2019 14:00:00, NaN  
31-Jan-2019 15:00:00, NaN  
31-Jan-2019 16:00:00, NaN  
31-Jan-2019 17:00:00, NaN  
31-Jan-2019 18:00:00, NaN  
31-Jan-2019 19:00:00, NaN  
31-Jan-2019 20:00:00, NaN  
31-Jan-2019 21:00:00, NaN  
31-Jan-2019 22:00:00, NaN  
31-Jan-2019 23:00:00, NaN  
01-Feb-2019, NaN  
01-Feb-2019 01:00:00, NaN  
01-Feb-2019 02:00:00, NaN  
01-Feb-2019 03:00:00, NaN  
01-Feb-2019 04:00:00, NaN  
01-Feb-2019 05:00:00, NaN  
01-Feb-2019 06:00:00, NaN



01-Feb-2019 07:00:00, NaN  
01-Feb-2019 08:00:00, NaN  
01-Feb-2019 09:00:00, NaN  
01-Feb-2019 10:00:00, NaN  
01-Feb-2019 11:00:00, NaN  
01-Feb-2019 12:00:00, NaN  
01-Feb-2019 13:00:00, NaN  
01-Feb-2019 14:00:00, NaN  
01-Feb-2019 15:00:00, NaN  
01-Feb-2019 16:00:00, NaN  
01-Feb-2019 17:00:00, NaN  
01-Feb-2019 18:00:00, NaN  
01-Feb-2019 19:00:00, NaN  
01-Feb-2019 20:00:00, NaN  
01-Feb-2019 21:00:00, NaN  
01-Feb-2019 22:00:00, NaN  
01-Feb-2019 23:00:00, NaN  
02-Feb-2019, NaN  
02-Feb-2019 01:00:00, NaN  
02-Feb-2019 02:00:00, NaN  
02-Feb-2019 03:00:00, NaN  
02-Feb-2019 04:00:00, NaN  
02-Feb-2019 05:00:00, NaN  
02-Feb-2019 06:00:00, NaN  
02-Feb-2019 07:00:00, NaN  
02-Feb-2019 08:00:00, NaN  
02-Feb-2019 09:00:00, NaN  
02-Feb-2019 10:00:00, NaN  
02-Feb-2019 11:00:00, NaN  
02-Feb-2019 12:00:00, NaN  
02-Feb-2019 13:00:00, NaN  
02-Feb-2019 14:00:00, NaN  
02-Feb-2019 15:00:00, NaN  
02-Feb-2019 16:00:00, NaN  
02-Feb-2019 17:00:00, NaN  
02-Feb-2019 18:00:00, NaN  
02-Feb-2019 19:00:00, NaN  
02-Feb-2019 20:00:00, NaN  
02-Feb-2019 21:00:00, NaN  
02-Feb-2019 22:00:00, NaN  
02-Feb-2019 23:00:00, NaN  
03-Feb-2019, NaN  
03-Feb-2019 01:00:00, NaN  
03-Feb-2019 02:00:00, NaN  
03-Feb-2019 03:00:00, NaN  
03-Feb-2019 04:00:00, NaN  
03-Feb-2019 05:00:00, NaN  
03-Feb-2019 06:00:00, NaN  
03-Feb-2019 07:00:00, NaN  
03-Feb-2019 08:00:00, NaN  
03-Feb-2019 09:00:00, NaN  
03-Feb-2019 10:00:00, NaN  
03-Feb-2019 11:00:00, NaN  
03-Feb-2019 12:00:00, NaN  
03-Feb-2019 13:00:00, NaN  
03-Feb-2019 14:00:00, NaN  
03-Feb-2019 15:00:00, NaN  
03-Feb-2019 16:00:00, NaN  
03-Feb-2019 17:00:00, NaN  
03-Feb-2019 18:00:00, NaN  
03-Feb-2019 19:00:00, NaN  
03-Feb-2019 20:00:00, NaN  
03-Feb-2019 21:00:00, NaN  
03-Feb-2019 22:00:00, NaN

03-Feb-2019 23:00:00, NaN  
04-Feb-2019, NaN  
04-Feb-2019 01:00:00, NaN  
04-Feb-2019 02:00:00, NaN  
04-Feb-2019 03:00:00, NaN  
04-Feb-2019 04:00:00, NaN  
04-Feb-2019 05:00:00, NaN  
04-Feb-2019 06:00:00, NaN  
04-Feb-2019 07:00:00, NaN  
04-Feb-2019 08:00:00, NaN  
04-Feb-2019 09:00:00, NaN  
04-Feb-2019 10:00:00, NaN  
04-Feb-2019 11:00:00, NaN  
04-Feb-2019 12:00:00, NaN  
04-Feb-2019 13:00:00, NaN  
04-Feb-2019 14:00:00, NaN  
04-Feb-2019 15:00:00, NaN  
04-Feb-2019 16:00:00, NaN  
04-Feb-2019 17:00:00, NaN  
04-Feb-2019 18:00:00, NaN  
04-Feb-2019 19:00:00, NaN  
04-Feb-2019 20:00:00, NaN  
04-Feb-2019 21:00:00, NaN  
04-Feb-2019 22:00:00, NaN  
04-Feb-2019 23:00:00, NaN  
05-Feb-2019, NaN  
05-Feb-2019 01:00:00, NaN  
05-Feb-2019 02:00:00, NaN  
05-Feb-2019 03:00:00, NaN  
05-Feb-2019 04:00:00, NaN  
05-Feb-2019 05:00:00, NaN  
05-Feb-2019 06:00:00, NaN  
05-Feb-2019 07:00:00, NaN  
05-Feb-2019 08:00:00, NaN  
05-Feb-2019 09:00:00, NaN  
05-Feb-2019 10:00:00, NaN  
05-Feb-2019 11:00:00, NaN  
05-Feb-2019 12:00:00, NaN  
05-Feb-2019 13:00:00, NaN  
05-Feb-2019 14:00:00, NaN  
05-Feb-2019 15:00:00, NaN  
05-Feb-2019 16:00:00, NaN  
05-Feb-2019 17:00:00, NaN  
05-Feb-2019 18:00:00, NaN  
05-Feb-2019 19:00:00, NaN  
05-Feb-2019 20:00:00, NaN  
05-Feb-2019 21:00:00, NaN  
05-Feb-2019 22:00:00, NaN  
05-Feb-2019 23:00:00, NaN  
06-Feb-2019, NaN  
06-Feb-2019 01:00:00, NaN  
06-Feb-2019 02:00:00, NaN  
06-Feb-2019 03:00:00, NaN  
06-Feb-2019 04:00:00, NaN  
06-Feb-2019 05:00:00, NaN  
06-Feb-2019 06:00:00, NaN  
06-Feb-2019 07:00:00, NaN  
06-Feb-2019 08:00:00, NaN  
06-Feb-2019 09:00:00, NaN  
06-Feb-2019 10:00:00, NaN  
06-Feb-2019 11:00:00, NaN  
06-Feb-2019 12:00:00, NaN  
06-Feb-2019 13:00:00, NaN  
06-Feb-2019 14:00:00, NaN

06-Feb-2019 15:00:00, NaN  
06-Feb-2019 16:00:00, NaN  
06-Feb-2019 17:00:00, NaN  
06-Feb-2019 18:00:00, NaN  
06-Feb-2019 19:00:00, NaN  
06-Feb-2019 20:00:00, NaN  
06-Feb-2019 21:00:00, NaN  
06-Feb-2019 22:00:00, NaN  
06-Feb-2019 23:00:00, NaN  
07-Feb-2019, NaN  
07-Feb-2019 01:00:00, NaN  
07-Feb-2019 02:00:00, NaN  
07-Feb-2019 03:00:00, NaN  
07-Feb-2019 04:00:00, NaN  
07-Feb-2019 05:00:00, NaN  
07-Feb-2019 06:00:00, NaN  
07-Feb-2019 07:00:00, NaN  
07-Feb-2019 08:00:00, NaN  
07-Feb-2019 09:00:00, NaN  
07-Feb-2019 10:00:00, NaN  
07-Feb-2019 11:00:00, NaN  
07-Feb-2019 12:00:00, NaN  
07-Feb-2019 13:00:00, NaN  
07-Feb-2019 14:00:00, NaN  
07-Feb-2019 15:00:00, NaN  
07-Feb-2019 16:00:00, NaN  
07-Feb-2019 17:00:00, NaN  
07-Feb-2019 18:00:00, NaN  
07-Feb-2019 19:00:00, NaN  
07-Feb-2019 20:00:00, NaN  
07-Feb-2019 21:00:00, NaN  
07-Feb-2019 22:00:00, NaN  
07-Feb-2019 23:00:00, NaN  
08-Feb-2019, NaN  
08-Feb-2019 01:00:00, NaN  
08-Feb-2019 02:00:00, NaN  
08-Feb-2019 03:00:00, NaN  
08-Feb-2019 04:00:00, NaN  
08-Feb-2019 05:00:00, NaN  
08-Feb-2019 06:00:00, NaN  
08-Feb-2019 07:00:00, NaN  
08-Feb-2019 08:00:00, NaN  
08-Feb-2019 09:00:00, NaN  
08-Feb-2019 10:00:00, NaN  
08-Feb-2019 11:00:00, NaN  
08-Feb-2019 12:00:00, NaN  
08-Feb-2019 13:00:00, NaN  
08-Feb-2019 14:00:00, NaN  
08-Feb-2019 15:00:00, NaN  
08-Feb-2019 16:00:00, NaN  
08-Feb-2019 17:00:00, NaN  
08-Feb-2019 18:00:00, NaN  
08-Feb-2019 19:00:00, NaN  
08-Feb-2019 20:00:00, NaN  
08-Feb-2019 21:00:00, NaN  
08-Feb-2019 22:00:00, NaN  
08-Feb-2019 23:00:00, NaN  
09-Feb-2019, NaN  
09-Feb-2019 01:00:00, NaN  
09-Feb-2019 02:00:00, NaN  
09-Feb-2019 03:00:00, NaN  
09-Feb-2019 04:00:00, NaN  
09-Feb-2019 05:00:00, NaN  
09-Feb-2019 06:00:00, NaN

09-Feb-2019 07:00:00, NaN  
09-Feb-2019 08:00:00, NaN  
09-Feb-2019 09:00:00, NaN  
09-Feb-2019 10:00:00, NaN  
09-Feb-2019 11:00:00, NaN  
09-Feb-2019 12:00:00, NaN  
09-Feb-2019 13:00:00, NaN  
09-Feb-2019 14:00:00, NaN  
09-Feb-2019 15:00:00, NaN  
09-Feb-2019 16:00:00, NaN  
09-Feb-2019 17:00:00, NaN  
09-Feb-2019 18:00:00, NaN  
09-Feb-2019 19:00:00, NaN  
09-Feb-2019 20:00:00, NaN  
09-Feb-2019 21:00:00, NaN  
09-Feb-2019 22:00:00, NaN  
09-Feb-2019 23:00:00, NaN  
10-Feb-2019, NaN  
10-Feb-2019 01:00:00, NaN  
10-Feb-2019 02:00:00, NaN  
10-Feb-2019 03:00:00, NaN  
10-Feb-2019 04:00:00, NaN  
10-Feb-2019 05:00:00, NaN  
10-Feb-2019 06:00:00, NaN  
10-Feb-2019 07:00:00, NaN  
10-Feb-2019 08:00:00, NaN  
10-Feb-2019 09:00:00, NaN  
10-Feb-2019 10:00:00, NaN  
10-Feb-2019 11:00:00, NaN  
10-Feb-2019 12:00:00, NaN  
10-Feb-2019 13:00:00, NaN  
10-Feb-2019 14:00:00, NaN  
10-Feb-2019 15:00:00, NaN  
10-Feb-2019 16:00:00, NaN  
10-Feb-2019 17:00:00, NaN  
10-Feb-2019 18:00:00, NaN  
10-Feb-2019 19:00:00, NaN  
10-Feb-2019 20:00:00, NaN  
10-Feb-2019 21:00:00, NaN  
10-Feb-2019 22:00:00, NaN  
10-Feb-2019 23:00:00, NaN  
11-Feb-2019, NaN  
11-Feb-2019 01:00:00, NaN  
11-Feb-2019 02:00:00, NaN  
11-Feb-2019 03:00:00, NaN  
11-Feb-2019 04:00:00, NaN  
11-Feb-2019 05:00:00, NaN  
11-Feb-2019 06:00:00, NaN  
11-Feb-2019 07:00:00, NaN  
11-Feb-2019 08:00:00, NaN  
11-Feb-2019 09:00:00, NaN  
11-Feb-2019 10:00:00, NaN  
11-Feb-2019 11:00:00, NaN  
11-Feb-2019 12:00:00, NaN  
11-Feb-2019 13:00:00, NaN  
11-Feb-2019 14:00:00, NaN  
11-Feb-2019 15:00:00, NaN  
11-Feb-2019 16:00:00, NaN  
11-Feb-2019 17:00:00, NaN  
11-Feb-2019 18:00:00, NaN  
11-Feb-2019 19:00:00, NaN  
11-Feb-2019 20:00:00, NaN  
11-Feb-2019 21:00:00, NaN  
11-Feb-2019 22:00:00, NaN

11-Feb-2019 23:00:00, NaN  
12-Feb-2019, NaN  
12-Feb-2019 01:00:00, NaN  
12-Feb-2019 02:00:00, NaN  
12-Feb-2019 03:00:00, NaN  
12-Feb-2019 04:00:00, NaN  
12-Feb-2019 05:00:00, NaN  
12-Feb-2019 06:00:00, NaN  
12-Feb-2019 07:00:00, NaN  
12-Feb-2019 08:00:00, NaN  
12-Feb-2019 09:00:00, NaN  
12-Feb-2019 10:00:00, NaN  
12-Feb-2019 11:00:00, NaN  
12-Feb-2019 12:00:00, NaN  
12-Feb-2019 13:00:00, NaN  
12-Feb-2019 14:00:00, NaN  
12-Feb-2019 15:00:00, NaN  
12-Feb-2019 16:00:00, NaN  
12-Feb-2019 17:00:00, NaN  
12-Feb-2019 18:00:00, NaN  
12-Feb-2019 19:00:00, NaN  
12-Feb-2019 20:00:00, NaN  
12-Feb-2019 21:00:00, NaN  
12-Feb-2019 22:00:00, NaN  
12-Feb-2019 23:00:00, NaN  
13-Feb-2019, NaN  
13-Feb-2019 01:00:00, NaN  
13-Feb-2019 02:00:00, NaN  
13-Feb-2019 03:00:00, NaN  
13-Feb-2019 04:00:00, NaN  
13-Feb-2019 05:00:00, NaN  
13-Feb-2019 06:00:00, NaN  
13-Feb-2019 07:00:00, NaN  
13-Feb-2019 08:00:00, NaN  
13-Feb-2019 09:00:00, NaN  
13-Feb-2019 10:00:00, NaN  
13-Feb-2019 11:00:00, NaN  
13-Feb-2019 12:00:00, NaN  
13-Feb-2019 13:00:00, NaN  
13-Feb-2019 14:00:00, NaN  
13-Feb-2019 15:00:00, NaN  
13-Feb-2019 16:00:00, NaN  
13-Feb-2019 17:00:00, NaN  
13-Feb-2019 18:00:00, NaN  
13-Feb-2019 19:00:00, NaN  
13-Feb-2019 20:00:00, NaN  
13-Feb-2019 21:00:00, NaN  
13-Feb-2019 22:00:00, NaN  
13-Feb-2019 23:00:00, NaN  
14-Feb-2019, NaN  
14-Feb-2019 01:00:00, NaN  
14-Feb-2019 02:00:00, NaN  
14-Feb-2019 03:00:00, NaN  
14-Feb-2019 04:00:00, NaN  
14-Feb-2019 05:00:00, NaN  
14-Feb-2019 06:00:00, NaN  
14-Feb-2019 07:00:00, NaN  
14-Feb-2019 08:00:00, NaN  
14-Feb-2019 09:00:00, NaN  
14-Feb-2019 10:00:00, NaN  
14-Feb-2019 11:00:00, NaN  
14-Feb-2019 12:00:00, NaN  
14-Feb-2019 13:00:00, NaN  
14-Feb-2019 14:00:00, NaN

14-Feb-2019 15:00:00, NaN  
14-Feb-2019 16:00:00, NaN  
14-Feb-2019 17:00:00, NaN  
14-Feb-2019 18:00:00, NaN  
14-Feb-2019 19:00:00, NaN  
14-Feb-2019 20:00:00, NaN  
14-Feb-2019 21:00:00, NaN  
14-Feb-2019 22:00:00, NaN  
14-Feb-2019 23:00:00, NaN  
15-Feb-2019, NaN  
15-Feb-2019 01:00:00, NaN  
15-Feb-2019 02:00:00, NaN  
15-Feb-2019 03:00:00, NaN  
15-Feb-2019 04:00:00, NaN  
15-Feb-2019 05:00:00, NaN  
15-Feb-2019 06:00:00, NaN  
15-Feb-2019 07:00:00, NaN  
15-Feb-2019 08:00:00, NaN  
15-Feb-2019 09:00:00, NaN  
15-Feb-2019 10:00:00, NaN  
15-Feb-2019 11:00:00, NaN  
15-Feb-2019 12:00:00, NaN  
15-Feb-2019 13:00:00, NaN  
15-Feb-2019 14:00:00, NaN  
15-Feb-2019 15:00:00, NaN  
15-Feb-2019 16:00:00, NaN  
15-Feb-2019 17:00:00, NaN  
15-Feb-2019 18:00:00, NaN  
15-Feb-2019 19:00:00, NaN  
15-Feb-2019 20:00:00, NaN  
15-Feb-2019 21:00:00, NaN  
15-Feb-2019 22:00:00, NaN  
15-Feb-2019 23:00:00, NaN  
16-Feb-2019, NaN  
16-Feb-2019 01:00:00, NaN  
16-Feb-2019 02:00:00, NaN  
16-Feb-2019 03:00:00, NaN  
16-Feb-2019 04:00:00, NaN  
16-Feb-2019 05:00:00, NaN  
16-Feb-2019 06:00:00, NaN  
16-Feb-2019 07:00:00, NaN  
16-Feb-2019 08:00:00, NaN  
16-Feb-2019 09:00:00, NaN  
16-Feb-2019 10:00:00, NaN  
16-Feb-2019 11:00:00, NaN  
16-Feb-2019 12:00:00, NaN  
16-Feb-2019 13:00:00, NaN  
16-Feb-2019 14:00:00, NaN  
16-Feb-2019 15:00:00, NaN  
16-Feb-2019 16:00:00, NaN  
16-Feb-2019 17:00:00, NaN  
16-Feb-2019 18:00:00, NaN  
16-Feb-2019 19:00:00, NaN  
16-Feb-2019 20:00:00, NaN  
16-Feb-2019 21:00:00, NaN  
16-Feb-2019 22:00:00, NaN  
16-Feb-2019 23:00:00, NaN  
17-Feb-2019, NaN  
17-Feb-2019 01:00:00, NaN  
17-Feb-2019 02:00:00, NaN  
17-Feb-2019 03:00:00, NaN  
17-Feb-2019 04:00:00, NaN  
17-Feb-2019 05:00:00, NaN  
17-Feb-2019 06:00:00, NaN

17-Feb-2019 07:00:00, NaN  
17-Feb-2019 08:00:00, NaN  
17-Feb-2019 09:00:00, NaN  
17-Feb-2019 10:00:00, NaN  
17-Feb-2019 11:00:00, NaN  
17-Feb-2019 12:00:00, NaN  
17-Feb-2019 13:00:00, NaN  
17-Feb-2019 14:00:00, NaN  
17-Feb-2019 15:00:00, NaN  
17-Feb-2019 16:00:00, NaN  
17-Feb-2019 17:00:00, NaN  
17-Feb-2019 18:00:00, NaN  
17-Feb-2019 19:00:00, NaN  
17-Feb-2019 20:00:00, NaN  
17-Feb-2019 21:00:00, NaN  
17-Feb-2019 22:00:00, NaN  
17-Feb-2019 23:00:00, NaN  
18-Feb-2019, NaN  
18-Feb-2019 01:00:00, NaN  
18-Feb-2019 02:00:00, NaN  
18-Feb-2019 03:00:00, NaN  
18-Feb-2019 04:00:00, NaN  
18-Feb-2019 05:00:00, NaN  
18-Feb-2019 06:00:00, NaN  
18-Feb-2019 07:00:00, NaN  
18-Feb-2019 08:00:00, NaN  
18-Feb-2019 09:00:00, NaN  
18-Feb-2019 10:00:00, NaN  
18-Feb-2019 11:00:00, NaN  
18-Feb-2019 12:00:00, NaN  
18-Feb-2019 13:00:00, NaN  
18-Feb-2019 14:00:00, NaN  
18-Feb-2019 15:00:00, NaN  
18-Feb-2019 16:00:00, NaN  
18-Feb-2019 17:00:00, NaN  
18-Feb-2019 18:00:00, NaN  
18-Feb-2019 19:00:00, NaN  
18-Feb-2019 20:00:00, NaN  
18-Feb-2019 21:00:00, NaN  
18-Feb-2019 22:00:00, NaN  
18-Feb-2019 23:00:00, NaN  
19-Feb-2019, NaN  
19-Feb-2019 01:00:00, NaN  
19-Feb-2019 02:00:00, NaN  
19-Feb-2019 03:00:00, NaN  
19-Feb-2019 04:00:00, NaN  
19-Feb-2019 05:00:00, NaN  
19-Feb-2019 06:00:00, NaN  
19-Feb-2019 07:00:00, NaN  
19-Feb-2019 08:00:00, NaN  
19-Feb-2019 09:00:00, NaN  
19-Feb-2019 10:00:00, NaN  
19-Feb-2019 11:00:00, NaN  
19-Feb-2019 12:00:00, NaN  
19-Feb-2019 13:00:00, NaN  
19-Feb-2019 14:00:00, NaN  
19-Feb-2019 15:00:00, NaN  
19-Feb-2019 16:00:00, NaN  
19-Feb-2019 17:00:00, NaN  
19-Feb-2019 18:00:00, NaN  
19-Feb-2019 19:00:00, NaN  
19-Feb-2019 20:00:00, NaN  
19-Feb-2019 21:00:00, NaN  
19-Feb-2019 22:00:00, NaN

19-Feb-2019 23:00:00, NaN  
20-Feb-2019, NaN  
20-Feb-2019 01:00:00, NaN  
20-Feb-2019 02:00:00, NaN  
20-Feb-2019 03:00:00, NaN  
20-Feb-2019 04:00:00, NaN  
20-Feb-2019 05:00:00, NaN  
20-Feb-2019 06:00:00, NaN  
20-Feb-2019 07:00:00, NaN  
20-Feb-2019 08:00:00, NaN  
20-Feb-2019 09:00:00, NaN  
20-Feb-2019 10:00:00, NaN  
20-Feb-2019 11:00:00, NaN  
20-Feb-2019 12:00:00, NaN  
20-Feb-2019 13:00:00, NaN  
20-Feb-2019 14:00:00, NaN  
20-Feb-2019 15:00:00, NaN  
20-Feb-2019 16:00:00, NaN  
20-Feb-2019 17:00:00, NaN  
20-Feb-2019 18:00:00, NaN  
20-Feb-2019 19:00:00, NaN  
20-Feb-2019 20:00:00, NaN  
20-Feb-2019 21:00:00, NaN  
20-Feb-2019 22:00:00, NaN  
20-Feb-2019 23:00:00, NaN  
21-Feb-2019, NaN  
21-Feb-2019 01:00:00, NaN  
21-Feb-2019 02:00:00, NaN  
21-Feb-2019 03:00:00, NaN  
21-Feb-2019 04:00:00, NaN  
21-Feb-2019 05:00:00, NaN  
21-Feb-2019 06:00:00, NaN  
21-Feb-2019 07:00:00, NaN  
21-Feb-2019 08:00:00, NaN  
21-Feb-2019 09:00:00, NaN  
21-Feb-2019 10:00:00, NaN  
21-Feb-2019 11:00:00, NaN  
21-Feb-2019 12:00:00, NaN  
21-Feb-2019 13:00:00, NaN  
21-Feb-2019 14:00:00, NaN  
21-Feb-2019 15:00:00, NaN  
21-Feb-2019 16:00:00, NaN  
21-Feb-2019 17:00:00, NaN  
21-Feb-2019 18:00:00, NaN  
21-Feb-2019 19:00:00, NaN  
21-Feb-2019 20:00:00, NaN  
21-Feb-2019 21:00:00, NaN  
21-Feb-2019 22:00:00, NaN  
21-Feb-2019 23:00:00, NaN  
22-Feb-2019, NaN  
22-Feb-2019 01:00:00, NaN  
22-Feb-2019 02:00:00, NaN  
22-Feb-2019 03:00:00, NaN  
22-Feb-2019 04:00:00, NaN  
22-Feb-2019 05:00:00, NaN  
22-Feb-2019 06:00:00, NaN  
22-Feb-2019 07:00:00, NaN  
22-Feb-2019 08:00:00, NaN  
22-Feb-2019 09:00:00, NaN  
22-Feb-2019 10:00:00, NaN  
22-Feb-2019 11:00:00, NaN  
22-Feb-2019 12:00:00, NaN  
22-Feb-2019 13:00:00, NaN  
22-Feb-2019 14:00:00, NaN



22-Feb-2019 15:00:00, NaN  
22-Feb-2019 16:00:00, NaN  
22-Feb-2019 17:00:00, NaN  
22-Feb-2019 18:00:00, NaN  
22-Feb-2019 19:00:00, NaN  
22-Feb-2019 20:00:00, NaN  
22-Feb-2019 21:00:00, NaN  
22-Feb-2019 22:00:00, NaN  
22-Feb-2019 23:00:00, NaN  
23-Feb-2019, NaN  
23-Feb-2019 01:00:00, NaN  
23-Feb-2019 02:00:00, NaN  
23-Feb-2019 03:00:00, NaN  
23-Feb-2019 04:00:00, NaN  
23-Feb-2019 05:00:00, NaN  
23-Feb-2019 06:00:00, NaN  
23-Feb-2019 07:00:00, NaN  
23-Feb-2019 08:00:00, NaN  
23-Feb-2019 09:00:00, NaN  
23-Feb-2019 10:00:00, NaN  
23-Feb-2019 11:00:00, NaN  
23-Feb-2019 12:00:00, NaN  
23-Feb-2019 13:00:00, NaN  
23-Feb-2019 14:00:00, NaN  
23-Feb-2019 15:00:00, NaN  
23-Feb-2019 16:00:00, NaN  
23-Feb-2019 17:00:00, NaN  
23-Feb-2019 18:00:00, NaN  
23-Feb-2019 19:00:00, NaN  
23-Feb-2019 20:00:00, NaN  
23-Feb-2019 21:00:00, NaN  
23-Feb-2019 22:00:00, NaN  
23-Feb-2019 23:00:00, NaN  
24-Feb-2019, NaN  
24-Feb-2019 01:00:00, NaN  
24-Feb-2019 02:00:00, NaN  
24-Feb-2019 03:00:00, NaN  
24-Feb-2019 04:00:00, NaN  
24-Feb-2019 05:00:00, NaN  
24-Feb-2019 06:00:00, NaN  
24-Feb-2019 07:00:00, NaN  
24-Feb-2019 08:00:00, NaN  
24-Feb-2019 09:00:00, NaN  
24-Feb-2019 10:00:00, NaN  
24-Feb-2019 11:00:00, NaN  
24-Feb-2019 12:00:00, NaN  
24-Feb-2019 13:00:00, NaN  
24-Feb-2019 14:00:00, NaN  
24-Feb-2019 15:00:00, NaN  
24-Feb-2019 16:00:00, NaN  
24-Feb-2019 17:00:00, NaN  
24-Feb-2019 18:00:00, NaN  
24-Feb-2019 19:00:00, NaN  
24-Feb-2019 20:00:00, NaN  
24-Feb-2019 21:00:00, NaN  
24-Feb-2019 22:00:00, NaN  
24-Feb-2019 23:00:00, NaN  
25-Feb-2019, NaN  
25-Feb-2019 01:00:00, NaN  
25-Feb-2019 02:00:00, NaN  
25-Feb-2019 03:00:00, NaN  
25-Feb-2019 04:00:00, NaN  
25-Feb-2019 05:00:00, NaN  
25-Feb-2019 06:00:00, NaN

25-Feb-2019 07:00:00, NaN  
25-Feb-2019 08:00:00, NaN  
25-Feb-2019 09:00:00, NaN  
25-Feb-2019 10:00:00, NaN  
25-Feb-2019 11:00:00, NaN  
25-Feb-2019 12:00:00, NaN  
25-Feb-2019 13:00:00, NaN  
25-Feb-2019 14:00:00, NaN  
25-Feb-2019 15:00:00, NaN  
25-Feb-2019 16:00:00, NaN  
25-Feb-2019 17:00:00, NaN  
25-Feb-2019 18:00:00, NaN  
25-Feb-2019 19:00:00, NaN  
25-Feb-2019 20:00:00, NaN  
25-Feb-2019 21:00:00, NaN  
25-Feb-2019 22:00:00, NaN  
25-Feb-2019 23:00:00, NaN  
26-Feb-2019, NaN  
26-Feb-2019 01:00:00, NaN  
26-Feb-2019 02:00:00, NaN  
26-Feb-2019 03:00:00, NaN  
26-Feb-2019 04:00:00, NaN  
26-Feb-2019 05:00:00, NaN  
26-Feb-2019 06:00:00, NaN  
26-Feb-2019 07:00:00, NaN  
26-Feb-2019 08:00:00, NaN  
26-Feb-2019 09:00:00, NaN  
26-Feb-2019 10:00:00, NaN  
26-Feb-2019 11:00:00, NaN  
26-Feb-2019 12:00:00, NaN  
26-Feb-2019 13:00:00, NaN  
26-Feb-2019 14:00:00, NaN  
26-Feb-2019 15:00:00, NaN  
26-Feb-2019 16:00:00, NaN  
26-Feb-2019 17:00:00, NaN  
26-Feb-2019 18:00:00, NaN  
26-Feb-2019 19:00:00, NaN  
26-Feb-2019 20:00:00, NaN  
26-Feb-2019 21:00:00, NaN  
26-Feb-2019 22:00:00, NaN  
26-Feb-2019 23:00:00, NaN  
27-Feb-2019, NaN  
27-Feb-2019 01:00:00, NaN  
27-Feb-2019 02:00:00, NaN  
27-Feb-2019 03:00:00, NaN  
27-Feb-2019 04:00:00, NaN  
27-Feb-2019 05:00:00, NaN  
27-Feb-2019 06:00:00, NaN  
27-Feb-2019 07:00:00, NaN  
27-Feb-2019 08:00:00, NaN  
27-Feb-2019 09:00:00, NaN  
27-Feb-2019 10:00:00, NaN  
27-Feb-2019 11:00:00, NaN  
27-Feb-2019 12:00:00, NaN  
27-Feb-2019 13:00:00, NaN  
27-Feb-2019 14:00:00, NaN  
27-Feb-2019 15:00:00, NaN  
27-Feb-2019 16:00:00, NaN  
27-Feb-2019 17:00:00, NaN  
27-Feb-2019 18:00:00, NaN  
27-Feb-2019 19:00:00, NaN  
27-Feb-2019 20:00:00, NaN  
27-Feb-2019 21:00:00, NaN  
27-Feb-2019 22:00:00, NaN

27-Feb-2019 23:00:00, NaN  
28-Feb-2019, NaN  
28-Feb-2019 01:00:00, NaN  
28-Feb-2019 02:00:00, NaN  
28-Feb-2019 03:00:00, NaN  
28-Feb-2019 04:00:00, NaN  
28-Feb-2019 05:00:00, NaN  
28-Feb-2019 06:00:00, NaN  
28-Feb-2019 07:00:00, NaN  
28-Feb-2019 08:00:00, NaN  
28-Feb-2019 09:00:00, NaN  
28-Feb-2019 10:00:00, NaN  
28-Feb-2019 11:00:00, NaN  
28-Feb-2019 12:00:00, NaN  
28-Feb-2019 13:00:00, NaN  
28-Feb-2019 14:00:00, NaN  
28-Feb-2019 15:00:00, NaN  
28-Feb-2019 16:00:00, NaN  
28-Feb-2019 17:00:00, NaN  
28-Feb-2019 18:00:00, NaN  
28-Feb-2019 19:00:00, NaN  
28-Feb-2019 20:00:00, NaN  
28-Feb-2019 21:00:00, NaN  
28-Feb-2019 22:00:00, NaN  
28-Feb-2019 23:00:00, NaN  
01-Mar-2019, NaN  
01-Mar-2019 01:00:00, NaN  
01-Mar-2019 02:00:00, NaN  
01-Mar-2019 03:00:00, NaN  
01-Mar-2019 04:00:00, NaN  
01-Mar-2019 05:00:00, NaN  
01-Mar-2019 06:00:00, NaN  
01-Mar-2019 07:00:00, NaN  
01-Mar-2019 08:00:00, NaN  
01-Mar-2019 09:00:00, NaN  
01-Mar-2019 10:00:00, NaN  
01-Mar-2019 11:00:00, NaN  
01-Mar-2019 12:00:00, NaN  
01-Mar-2019 13:00:00, NaN  
01-Mar-2019 14:00:00, NaN  
01-Mar-2019 15:00:00, NaN  
01-Mar-2019 16:00:00, NaN  
01-Mar-2019 17:00:00, NaN  
01-Mar-2019 18:00:00, NaN  
01-Mar-2019 19:00:00, NaN  
01-Mar-2019 20:00:00, NaN  
01-Mar-2019 21:00:00, NaN  
01-Mar-2019 22:00:00, NaN  
01-Mar-2019 23:00:00, NaN  
02-Mar-2019, NaN  
02-Mar-2019 01:00:00, NaN  
02-Mar-2019 02:00:00, NaN  
02-Mar-2019 03:00:00, NaN  
02-Mar-2019 04:00:00, NaN  
02-Mar-2019 05:00:00, NaN  
02-Mar-2019 06:00:00, NaN  
02-Mar-2019 07:00:00, NaN  
02-Mar-2019 08:00:00, NaN  
02-Mar-2019 09:00:00, NaN  
02-Mar-2019 10:00:00, NaN  
02-Mar-2019 11:00:00, NaN  
02-Mar-2019 12:00:00, NaN  
02-Mar-2019 13:00:00, NaN  
02-Mar-2019 14:00:00, NaN

02-Mar-2019 15:00:00, NaN  
02-Mar-2019 16:00:00, NaN  
02-Mar-2019 17:00:00, NaN  
02-Mar-2019 18:00:00, NaN  
02-Mar-2019 19:00:00, NaN  
02-Mar-2019 20:00:00, NaN  
02-Mar-2019 21:00:00, NaN  
02-Mar-2019 22:00:00, NaN  
02-Mar-2019 23:00:00, NaN  
03-Mar-2019, NaN  
03-Mar-2019 01:00:00, NaN  
03-Mar-2019 02:00:00, NaN  
03-Mar-2019 03:00:00, NaN  
03-Mar-2019 04:00:00, NaN  
03-Mar-2019 05:00:00, NaN  
03-Mar-2019 06:00:00, NaN  
03-Mar-2019 07:00:00, NaN  
03-Mar-2019 08:00:00, NaN  
03-Mar-2019 09:00:00, NaN  
03-Mar-2019 10:00:00, NaN  
03-Mar-2019 11:00:00, NaN  
03-Mar-2019 12:00:00, NaN  
03-Mar-2019 13:00:00, NaN  
03-Mar-2019 14:00:00, NaN  
03-Mar-2019 15:00:00, NaN  
03-Mar-2019 16:00:00, NaN  
03-Mar-2019 17:00:00, NaN  
03-Mar-2019 18:00:00, NaN  
03-Mar-2019 19:00:00, NaN  
03-Mar-2019 20:00:00, NaN  
03-Mar-2019 21:00:00, NaN  
03-Mar-2019 22:00:00, NaN  
03-Mar-2019 23:00:00, NaN  
04-Mar-2019, NaN  
04-Mar-2019 01:00:00, NaN  
04-Mar-2019 02:00:00, NaN  
04-Mar-2019 03:00:00, NaN  
04-Mar-2019 04:00:00, NaN  
04-Mar-2019 05:00:00, NaN  
04-Mar-2019 06:00:00, NaN  
04-Mar-2019 07:00:00, NaN  
04-Mar-2019 08:00:00, NaN  
04-Mar-2019 09:00:00, NaN  
04-Mar-2019 10:00:00, NaN  
04-Mar-2019 11:00:00, NaN  
04-Mar-2019 12:00:00, NaN  
04-Mar-2019 13:00:00, NaN  
04-Mar-2019 14:00:00, NaN  
04-Mar-2019 15:00:00, NaN  
04-Mar-2019 16:00:00, NaN  
04-Mar-2019 17:00:00, NaN  
04-Mar-2019 18:00:00, NaN  
04-Mar-2019 19:00:00, NaN  
04-Mar-2019 20:00:00, NaN  
04-Mar-2019 21:00:00, NaN  
04-Mar-2019 22:00:00, NaN  
04-Mar-2019 23:00:00, NaN  
05-Mar-2019, NaN  
05-Mar-2019 01:00:00, NaN  
05-Mar-2019 02:00:00, NaN  
05-Mar-2019 03:00:00, NaN  
05-Mar-2019 04:00:00, NaN  
05-Mar-2019 05:00:00, NaN  
05-Mar-2019 06:00:00, NaN

|              |           |     |
|--------------|-----------|-----|
| 05-Mar-2019  | 07:00:00, | NaN |
| 05-Mar-2019  | 08:00:00, | NaN |
| 05-Mar-2019  | 09:00:00, | NaN |
| 05-Mar-2019  | 10:00:00, | NaN |
| 05-Mar-2019  | 11:00:00, | NaN |
| 05-Mar-2019  | 12:00:00, | NaN |
| 05-Mar-2019  | 13:00:00, | NaN |
| 05-Mar-2019  | 14:00:00, | NaN |
| 05-Mar-2019  | 15:00:00, | NaN |
| 05-Mar-2019  | 16:00:00, | NaN |
| 05-Mar-2019  | 17:00:00, | NaN |
| 05-Mar-2019  | 18:00:00, | NaN |
| 05-Mar-2019  | 19:00:00, | NaN |
| 05-Mar-2019  | 20:00:00, | NaN |
| 05-Mar-2019  | 21:00:00, | NaN |
| 05-Mar-2019  | 22:00:00, | NaN |
| 05-Mar-2019  | 23:00:00, | NaN |
| 06-Mar-2019, |           | NaN |
| 06-Mar-2019  | 01:00:00, | NaN |
| 06-Mar-2019  | 02:00:00, | NaN |
| 06-Mar-2019  | 03:00:00, | NaN |
| 06-Mar-2019  | 04:00:00, | NaN |
| 06-Mar-2019  | 05:00:00, | NaN |
| 06-Mar-2019  | 06:00:00, | NaN |
| 06-Mar-2019  | 07:00:00, | NaN |
| 06-Mar-2019  | 08:00:00, | NaN |
| 06-Mar-2019  | 09:00:00, | NaN |
| 06-Mar-2019  | 10:00:00, | NaN |
| 06-Mar-2019  | 11:00:00, | NaN |
| 06-Mar-2019  | 12:00:00, | NaN |
| 06-Mar-2019  | 13:00:00, | NaN |
| 06-Mar-2019  | 14:00:00, | NaN |
| 06-Mar-2019  | 15:00:00, | NaN |
| 06-Mar-2019  | 16:00:00, | NaN |
| 06-Mar-2019  | 17:00:00, | NaN |
| 06-Mar-2019  | 18:00:00, | NaN |
| 06-Mar-2019  | 19:00:00, | NaN |
| 06-Mar-2019  | 20:00:00, | NaN |
| 06-Mar-2019  | 21:00:00, | NaN |
| 06-Mar-2019  | 22:00:00, | NaN |
| 06-Mar-2019  | 23:00:00, | NaN |
| 07-Mar-2019, |           | NaN |
| 07-Mar-2019  | 01:00:00, | NaN |
| 07-Mar-2019  | 02:00:00, | NaN |
| 07-Mar-2019  | 03:00:00, | NaN |
| 07-Mar-2019  | 04:00:00, | NaN |
| 07-Mar-2019  | 05:00:00, | NaN |
| 07-Mar-2019  | 06:00:00, | NaN |
| 07-Mar-2019  | 07:00:00, | NaN |
| 07-Mar-2019  | 08:00:00, | NaN |
| 07-Mar-2019  | 09:00:00, | NaN |
| 07-Mar-2019  | 10:00:00, | NaN |
| 07-Mar-2019  | 11:00:00, | NaN |
| 07-Mar-2019  | 12:00:00, | NaN |
| 07-Mar-2019  | 13:00:00, | NaN |
| 07-Mar-2019  | 14:00:00, | NaN |
| 07-Mar-2019  | 15:00:00, | NaN |
| 07-Mar-2019  | 16:00:00, | NaN |
| 07-Mar-2019  | 17:00:00, | NaN |
| 07-Mar-2019  | 18:00:00, | NaN |
| 07-Mar-2019  | 19:00:00, | NaN |
| 07-Mar-2019  | 20:00:00, | NaN |
| 07-Mar-2019  | 21:00:00, | NaN |
| 07-Mar-2019  | 22:00:00, | NaN |

07-Mar-2019 23:00:00, NaN  
08-Mar-2019, NaN  
08-Mar-2019 01:00:00, NaN  
08-Mar-2019 02:00:00, NaN  
08-Mar-2019 03:00:00, NaN  
08-Mar-2019 04:00:00, NaN  
08-Mar-2019 05:00:00, NaN  
08-Mar-2019 06:00:00, NaN  
08-Mar-2019 07:00:00, NaN  
08-Mar-2019 08:00:00, NaN  
08-Mar-2019 09:00:00, NaN  
08-Mar-2019 10:00:00, NaN  
08-Mar-2019 11:00:00, NaN  
08-Mar-2019 12:00:00, NaN  
08-Mar-2019 13:00:00, NaN  
08-Mar-2019 14:00:00, NaN  
08-Mar-2019 15:00:00, NaN  
08-Mar-2019 16:00:00, NaN  
08-Mar-2019 17:00:00, NaN  
08-Mar-2019 18:00:00, NaN  
08-Mar-2019 19:00:00, NaN  
08-Mar-2019 20:00:00, NaN  
08-Mar-2019 21:00:00, NaN  
08-Mar-2019 22:00:00, NaN  
08-Mar-2019 23:00:00, NaN  
09-Mar-2019, NaN  
09-Mar-2019 01:00:00, NaN  
09-Mar-2019 02:00:00, NaN  
09-Mar-2019 03:00:00, NaN  
09-Mar-2019 04:00:00, NaN  
09-Mar-2019 05:00:00, NaN  
09-Mar-2019 06:00:00, NaN  
09-Mar-2019 07:00:00, NaN  
09-Mar-2019 08:00:00, NaN  
09-Mar-2019 09:00:00, NaN  
09-Mar-2019 10:00:00, NaN  
09-Mar-2019 11:00:00, NaN  
09-Mar-2019 12:00:00, NaN  
09-Mar-2019 13:00:00, NaN  
09-Mar-2019 14:00:00, NaN  
09-Mar-2019 15:00:00, NaN  
09-Mar-2019 16:00:00, NaN  
09-Mar-2019 17:00:00, NaN  
09-Mar-2019 18:00:00, NaN  
09-Mar-2019 19:00:00, NaN  
09-Mar-2019 20:00:00, NaN  
09-Mar-2019 21:00:00, NaN  
09-Mar-2019 22:00:00, NaN  
09-Mar-2019 23:00:00, NaN  
10-Mar-2019, NaN  
10-Mar-2019 01:00:00, NaN  
10-Mar-2019 02:00:00, NaN  
10-Mar-2019 03:00:00, NaN  
10-Mar-2019 04:00:00, NaN  
10-Mar-2019 05:00:00, NaN  
10-Mar-2019 06:00:00, NaN  
10-Mar-2019 08:00:00, NaN  
10-Mar-2019 09:00:00, NaN  
10-Mar-2019 10:00:00, NaN  
10-Mar-2019 11:00:00, NaN  
10-Mar-2019 12:00:00, NaN  
10-Mar-2019 13:00:00, NaN  
10-Mar-2019 14:00:00, NaN  
10-Mar-2019 15:00:00, NaN

10-Mar-2019 16:00:00, NaN  
10-Mar-2019 17:00:00, NaN  
10-Mar-2019 18:00:00, NaN  
10-Mar-2019 19:00:00, NaN  
10-Mar-2019 20:00:00, NaN  
10-Mar-2019 21:00:00, NaN  
10-Mar-2019 22:00:00, NaN  
10-Mar-2019 23:00:00, NaN  
11-Mar-2019, NaN  
11-Mar-2019 01:00:00, NaN  
11-Mar-2019 02:00:00, NaN  
11-Mar-2019 03:00:00, NaN  
11-Mar-2019 04:00:00, NaN  
11-Mar-2019 05:00:00, NaN  
11-Mar-2019 06:00:00, NaN  
11-Mar-2019 07:00:00, NaN  
11-Mar-2019 08:00:00, NaN  
11-Mar-2019 09:00:00, NaN  
11-Mar-2019 10:00:00, NaN  
11-Mar-2019 11:00:00, NaN  
11-Mar-2019 12:00:00, NaN  
11-Mar-2019 13:00:00, NaN  
11-Mar-2019 14:00:00, NaN  
11-Mar-2019 15:00:00, NaN  
11-Mar-2019 16:00:00, NaN  
11-Mar-2019 17:00:00, NaN  
11-Mar-2019 18:00:00, NaN  
11-Mar-2019 19:00:00, NaN  
11-Mar-2019 20:00:00, NaN  
11-Mar-2019 21:00:00, NaN  
11-Mar-2019 22:00:00, NaN  
11-Mar-2019 23:00:00, NaN  
12-Mar-2019, NaN  
12-Mar-2019 01:00:00, NaN  
12-Mar-2019 02:00:00, NaN  
12-Mar-2019 03:00:00, NaN  
12-Mar-2019 04:00:00, NaN  
12-Mar-2019 05:00:00, NaN  
12-Mar-2019 06:00:00, NaN  
12-Mar-2019 07:00:00, NaN  
12-Mar-2019 08:00:00, NaN  
12-Mar-2019 09:00:00, NaN  
12-Mar-2019 10:00:00, NaN  
12-Mar-2019 11:00:00, NaN  
12-Mar-2019 12:00:00, NaN  
12-Mar-2019 13:00:00, NaN  
12-Mar-2019 14:00:00, NaN  
12-Mar-2019 15:00:00, NaN  
12-Mar-2019 16:00:00, NaN  
12-Mar-2019 17:00:00, NaN  
12-Mar-2019 18:00:00, NaN  
12-Mar-2019 19:00:00, NaN  
12-Mar-2019 20:00:00, NaN  
12-Mar-2019 21:00:00, NaN  
12-Mar-2019 22:00:00, NaN  
12-Mar-2019 23:00:00, NaN  
13-Mar-2019, NaN  
13-Mar-2019 01:00:00, NaN  
13-Mar-2019 02:00:00, NaN  
13-Mar-2019 03:00:00, NaN  
13-Mar-2019 04:00:00, NaN  
13-Mar-2019 05:00:00, NaN  
13-Mar-2019 06:00:00, NaN  
13-Mar-2019 07:00:00, NaN

|              |           |     |
|--------------|-----------|-----|
| 13-Mar-2019  | 08:00:00, | NaN |
| 13-Mar-2019  | 09:00:00, | NaN |
| 13-Mar-2019  | 10:00:00, | NaN |
| 13-Mar-2019  | 11:00:00, | NaN |
| 13-Mar-2019  | 12:00:00, | NaN |
| 13-Mar-2019  | 13:00:00, | NaN |
| 13-Mar-2019  | 14:00:00, | NaN |
| 13-Mar-2019  | 15:00:00, | NaN |
| 13-Mar-2019  | 16:00:00, | NaN |
| 13-Mar-2019  | 17:00:00, | NaN |
| 13-Mar-2019  | 18:00:00, | NaN |
| 13-Mar-2019  | 19:00:00, | NaN |
| 13-Mar-2019  | 20:00:00, | NaN |
| 13-Mar-2019  | 21:00:00, | NaN |
| 13-Mar-2019  | 22:00:00, | NaN |
| 13-Mar-2019  | 23:00:00, | NaN |
| 14-Mar-2019, |           | NaN |
| 14-Mar-2019  | 01:00:00, | NaN |
| 14-Mar-2019  | 02:00:00, | NaN |
| 14-Mar-2019  | 03:00:00, | NaN |
| 14-Mar-2019  | 04:00:00, | NaN |
| 14-Mar-2019  | 05:00:00, | NaN |
| 14-Mar-2019  | 06:00:00, | NaN |
| 14-Mar-2019  | 07:00:00, | NaN |
| 14-Mar-2019  | 08:00:00, | NaN |
| 14-Mar-2019  | 09:00:00, | NaN |
| 14-Mar-2019  | 10:00:00, | NaN |
| 14-Mar-2019  | 11:00:00, | NaN |
| 14-Mar-2019  | 12:00:00, | NaN |
| 14-Mar-2019  | 13:00:00, | NaN |
| 14-Mar-2019  | 14:00:00, | NaN |
| 14-Mar-2019  | 15:00:00, | NaN |
| 14-Mar-2019  | 16:00:00, | NaN |
| 14-Mar-2019  | 17:00:00, | NaN |
| 14-Mar-2019  | 18:00:00, | NaN |
| 14-Mar-2019  | 19:00:00, | NaN |
| 14-Mar-2019  | 20:00:00, | NaN |
| 14-Mar-2019  | 21:00:00, | NaN |
| 14-Mar-2019  | 22:00:00, | NaN |
| 14-Mar-2019  | 23:00:00, | NaN |
| 15-Mar-2019, |           | NaN |
| 15-Mar-2019  | 01:00:00, | NaN |
| 15-Mar-2019  | 02:00:00, | NaN |
| 15-Mar-2019  | 03:00:00, | NaN |
| 15-Mar-2019  | 04:00:00, | NaN |
| 15-Mar-2019  | 05:00:00, | NaN |
| 15-Mar-2019  | 06:00:00, | NaN |
| 15-Mar-2019  | 07:00:00, | NaN |
| 15-Mar-2019  | 08:00:00, | NaN |
| 15-Mar-2019  | 09:00:00, | NaN |
| 15-Mar-2019  | 10:00:00, | NaN |
| 15-Mar-2019  | 11:00:00, | NaN |
| 15-Mar-2019  | 12:00:00, | NaN |
| 15-Mar-2019  | 13:00:00, | NaN |
| 15-Mar-2019  | 14:00:00, | NaN |
| 15-Mar-2019  | 15:00:00, | NaN |
| 15-Mar-2019  | 16:00:00, | NaN |
| 15-Mar-2019  | 17:00:00, | NaN |
| 15-Mar-2019  | 18:00:00, | NaN |
| 15-Mar-2019  | 19:00:00, | NaN |
| 15-Mar-2019  | 20:00:00, | NaN |
| 15-Mar-2019  | 21:00:00, | NaN |
| 15-Mar-2019  | 22:00:00, | NaN |
| 15-Mar-2019  | 23:00:00, | NaN |



16-Mar-2019, NaN  
16-Mar-2019 01:00:00, NaN  
16-Mar-2019 02:00:00, NaN  
16-Mar-2019 03:00:00, NaN  
16-Mar-2019 04:00:00, NaN  
16-Mar-2019 05:00:00, NaN  
16-Mar-2019 06:00:00, NaN  
16-Mar-2019 07:00:00, NaN  
16-Mar-2019 08:00:00, NaN  
16-Mar-2019 09:00:00, NaN  
16-Mar-2019 10:00:00, NaN  
16-Mar-2019 11:00:00, NaN  
16-Mar-2019 12:00:00, NaN  
16-Mar-2019 13:00:00, NaN  
16-Mar-2019 14:00:00, NaN  
16-Mar-2019 15:00:00, NaN  
16-Mar-2019 16:00:00, NaN  
16-Mar-2019 17:00:00, NaN  
16-Mar-2019 18:00:00, NaN  
16-Mar-2019 19:00:00, NaN  
16-Mar-2019 20:00:00, NaN  
16-Mar-2019 21:00:00, NaN  
16-Mar-2019 22:00:00, NaN  
16-Mar-2019 23:00:00, NaN  
17-Mar-2019, NaN  
17-Mar-2019 01:00:00, NaN  
17-Mar-2019 02:00:00, NaN  
17-Mar-2019 03:00:00, NaN  
17-Mar-2019 04:00:00, NaN  
17-Mar-2019 05:00:00, NaN  
17-Mar-2019 06:00:00, NaN  
17-Mar-2019 07:00:00, NaN  
17-Mar-2019 08:00:00, NaN  
17-Mar-2019 09:00:00, NaN  
17-Mar-2019 10:00:00, NaN  
17-Mar-2019 11:00:00, NaN  
17-Mar-2019 12:00:00, NaN  
17-Mar-2019 13:00:00, NaN  
17-Mar-2019 14:00:00, NaN  
17-Mar-2019 15:00:00, NaN  
17-Mar-2019 16:00:00, NaN  
17-Mar-2019 17:00:00, NaN  
17-Mar-2019 18:00:00, NaN  
17-Mar-2019 19:00:00, NaN  
17-Mar-2019 20:00:00, NaN  
17-Mar-2019 21:00:00, NaN  
17-Mar-2019 22:00:00, NaN  
17-Mar-2019 23:00:00, NaN  
18-Mar-2019, NaN  
18-Mar-2019 01:00:00, NaN  
18-Mar-2019 02:00:00, NaN  
18-Mar-2019 03:00:00, NaN  
18-Mar-2019 04:00:00, NaN  
18-Mar-2019 05:00:00, NaN  
18-Mar-2019 06:00:00, NaN  
18-Mar-2019 07:00:00, NaN  
18-Mar-2019 08:00:00, NaN  
18-Mar-2019 09:00:00, NaN  
18-Mar-2019 10:00:00, NaN  
18-Mar-2019 11:00:00, NaN  
18-Mar-2019 12:00:00, NaN  
18-Mar-2019 13:00:00, NaN  
18-Mar-2019 14:00:00, NaN  
18-Mar-2019 15:00:00, NaN

18-Mar-2019 16:00:00, NaN  
18-Mar-2019 17:00:00, NaN  
18-Mar-2019 18:00:00, NaN  
18-Mar-2019 19:00:00, NaN  
18-Mar-2019 20:00:00, NaN  
18-Mar-2019 21:00:00, NaN  
18-Mar-2019 22:00:00, NaN  
18-Mar-2019 23:00:00, NaN  
19-Mar-2019, NaN  
19-Mar-2019 01:00:00, NaN  
19-Mar-2019 02:00:00, NaN  
19-Mar-2019 03:00:00, NaN  
19-Mar-2019 04:00:00, NaN  
19-Mar-2019 05:00:00, NaN  
19-Mar-2019 06:00:00, NaN  
19-Mar-2019 07:00:00, NaN  
19-Mar-2019 08:00:00, NaN  
19-Mar-2019 09:00:00, NaN  
19-Mar-2019 10:00:00, NaN  
19-Mar-2019 11:00:00, NaN  
19-Mar-2019 12:00:00, NaN  
19-Mar-2019 13:00:00, NaN  
19-Mar-2019 14:00:00, NaN  
19-Mar-2019 15:00:00, NaN  
19-Mar-2019 16:00:00, NaN  
19-Mar-2019 17:00:00, NaN  
19-Mar-2019 18:00:00, NaN  
19-Mar-2019 19:00:00, NaN  
19-Mar-2019 20:00:00, NaN  
19-Mar-2019 21:00:00, NaN  
19-Mar-2019 22:00:00, NaN  
19-Mar-2019 23:00:00, NaN  
20-Mar-2019, NaN  
20-Mar-2019 01:00:00, NaN  
20-Mar-2019 02:00:00, NaN  
20-Mar-2019 03:00:00, NaN  
20-Mar-2019 04:00:00, NaN  
20-Mar-2019 05:00:00, NaN  
20-Mar-2019 06:00:00, NaN  
20-Mar-2019 07:00:00, NaN  
20-Mar-2019 08:00:00, NaN  
20-Mar-2019 09:00:00, NaN  
20-Mar-2019 10:00:00, NaN  
20-Mar-2019 11:00:00, NaN  
20-Mar-2019 12:00:00, NaN  
20-Mar-2019 13:00:00, NaN  
20-Mar-2019 14:00:00, NaN  
20-Mar-2019 15:00:00, NaN  
20-Mar-2019 16:00:00, NaN  
20-Mar-2019 17:00:00, NaN  
20-Mar-2019 18:00:00, NaN  
20-Mar-2019 19:00:00, NaN  
20-Mar-2019 20:00:00, NaN  
20-Mar-2019 21:00:00, NaN  
20-Mar-2019 22:00:00, NaN  
20-Mar-2019 23:00:00, NaN  
21-Mar-2019, NaN  
21-Mar-2019 01:00:00, NaN  
21-Mar-2019 02:00:00, NaN  
21-Mar-2019 03:00:00, NaN  
21-Mar-2019 04:00:00, NaN  
21-Mar-2019 05:00:00, NaN  
21-Mar-2019 06:00:00, NaN  
21-Mar-2019 07:00:00, NaN

21-Mar-2019 08:00:00, NaN  
21-Mar-2019 09:00:00, NaN  
21-Mar-2019 10:00:00, NaN  
21-Mar-2019 11:00:00, NaN  
21-Mar-2019 12:00:00, NaN  
21-Mar-2019 13:00:00, NaN  
21-Mar-2019 14:00:00, NaN  
21-Mar-2019 15:00:00, NaN  
21-Mar-2019 16:00:00, NaN  
21-Mar-2019 17:00:00, NaN  
21-Mar-2019 18:00:00, NaN  
21-Mar-2019 19:00:00, NaN  
21-Mar-2019 20:00:00, NaN  
21-Mar-2019 21:00:00, NaN  
21-Mar-2019 22:00:00, NaN  
21-Mar-2019 23:00:00, NaN  
22-Mar-2019, NaN  
22-Mar-2019 01:00:00, NaN  
22-Mar-2019 02:00:00, NaN  
22-Mar-2019 03:00:00, NaN  
22-Mar-2019 04:00:00, NaN  
22-Mar-2019 05:00:00, NaN  
22-Mar-2019 06:00:00, NaN  
22-Mar-2019 07:00:00, NaN  
22-Mar-2019 08:00:00, NaN  
22-Mar-2019 09:00:00, NaN  
22-Mar-2019 10:00:00, NaN  
22-Mar-2019 11:00:00, NaN  
22-Mar-2019 12:00:00, NaN  
22-Mar-2019 13:00:00, NaN  
22-Mar-2019 14:00:00, NaN  
22-Mar-2019 15:00:00, NaN  
22-Mar-2019 16:00:00, NaN  
22-Mar-2019 17:00:00, NaN  
22-Mar-2019 18:00:00, NaN  
22-Mar-2019 19:00:00, NaN  
22-Mar-2019 20:00:00, NaN  
22-Mar-2019 21:00:00, NaN  
22-Mar-2019 22:00:00, NaN  
22-Mar-2019 23:00:00, NaN  
23-Mar-2019, NaN  
23-Mar-2019 01:00:00, NaN  
23-Mar-2019 02:00:00, NaN  
23-Mar-2019 03:00:00, NaN  
23-Mar-2019 04:00:00, NaN  
23-Mar-2019 05:00:00, NaN  
23-Mar-2019 06:00:00, NaN  
23-Mar-2019 07:00:00, NaN  
23-Mar-2019 08:00:00, NaN  
23-Mar-2019 09:00:00, NaN  
23-Mar-2019 10:00:00, NaN  
23-Mar-2019 11:00:00, NaN  
23-Mar-2019 12:00:00, NaN  
23-Mar-2019 13:00:00, NaN  
23-Mar-2019 14:00:00, NaN  
23-Mar-2019 15:00:00, NaN  
23-Mar-2019 16:00:00, NaN  
23-Mar-2019 17:00:00, NaN  
23-Mar-2019 18:00:00, NaN  
23-Mar-2019 19:00:00, NaN  
23-Mar-2019 20:00:00, NaN  
23-Mar-2019 21:00:00, NaN  
23-Mar-2019 22:00:00, NaN  
23-Mar-2019 23:00:00, NaN

24-Mar-2019, NaN  
24-Mar-2019 01:00:00, NaN  
24-Mar-2019 02:00:00, NaN  
24-Mar-2019 03:00:00, NaN  
24-Mar-2019 04:00:00, NaN  
24-Mar-2019 05:00:00, NaN  
24-Mar-2019 06:00:00, NaN  
24-Mar-2019 07:00:00, NaN  
24-Mar-2019 08:00:00, NaN  
24-Mar-2019 09:00:00, NaN  
24-Mar-2019 10:00:00, NaN  
24-Mar-2019 11:00:00, NaN  
24-Mar-2019 12:00:00, NaN  
24-Mar-2019 13:00:00, NaN  
24-Mar-2019 14:00:00, NaN  
24-Mar-2019 15:00:00, NaN  
24-Mar-2019 16:00:00, NaN  
24-Mar-2019 17:00:00, NaN  
24-Mar-2019 18:00:00, NaN  
24-Mar-2019 19:00:00, NaN  
24-Mar-2019 20:00:00, NaN  
24-Mar-2019 21:00:00, NaN  
24-Mar-2019 22:00:00, NaN  
24-Mar-2019 23:00:00, NaN  
25-Mar-2019, NaN  
25-Mar-2019 01:00:00, NaN  
25-Mar-2019 02:00:00, NaN  
25-Mar-2019 03:00:00, NaN  
25-Mar-2019 04:00:00, NaN  
25-Mar-2019 05:00:00, NaN  
25-Mar-2019 06:00:00, NaN  
25-Mar-2019 07:00:00, NaN  
25-Mar-2019 08:00:00, NaN  
25-Mar-2019 09:00:00, NaN  
25-Mar-2019 10:00:00, NaN  
25-Mar-2019 11:00:00, NaN  
25-Mar-2019 12:00:00, NaN  
25-Mar-2019 13:00:00, NaN  
25-Mar-2019 14:00:00, NaN  
25-Mar-2019 15:00:00, NaN  
25-Mar-2019 16:00:00, NaN  
25-Mar-2019 17:00:00, NaN  
25-Mar-2019 18:00:00, NaN  
25-Mar-2019 19:00:00, NaN  
25-Mar-2019 20:00:00, NaN  
25-Mar-2019 21:00:00, NaN  
25-Mar-2019 22:00:00, NaN  
25-Mar-2019 23:00:00, NaN  
26-Mar-2019, NaN  
26-Mar-2019 01:00:00, NaN  
26-Mar-2019 02:00:00, NaN  
26-Mar-2019 03:00:00, NaN  
26-Mar-2019 04:00:00, NaN  
26-Mar-2019 05:00:00, NaN  
26-Mar-2019 06:00:00, NaN  
26-Mar-2019 07:00:00, NaN  
26-Mar-2019 08:00:00, NaN  
26-Mar-2019 09:00:00, NaN  
26-Mar-2019 10:00:00, NaN  
26-Mar-2019 11:00:00, NaN  
26-Mar-2019 12:00:00, NaN  
26-Mar-2019 13:00:00, NaN  
26-Mar-2019 14:00:00, NaN  
26-Mar-2019 15:00:00, NaN

26-Mar-2019 16:00:00, NaN  
26-Mar-2019 17:00:00, NaN  
26-Mar-2019 18:00:00, NaN  
26-Mar-2019 19:00:00, NaN  
26-Mar-2019 20:00:00, NaN  
26-Mar-2019 21:00:00, NaN  
26-Mar-2019 22:00:00, NaN  
26-Mar-2019 23:00:00, NaN  
27-Mar-2019, NaN  
27-Mar-2019 01:00:00, NaN  
27-Mar-2019 02:00:00, NaN  
27-Mar-2019 03:00:00, NaN  
27-Mar-2019 04:00:00, NaN  
27-Mar-2019 05:00:00, NaN  
27-Mar-2019 06:00:00, NaN  
27-Mar-2019 07:00:00, NaN  
27-Mar-2019 08:00:00, NaN  
27-Mar-2019 09:00:00, NaN  
27-Mar-2019 10:00:00, NaN  
27-Mar-2019 11:00:00, NaN  
27-Mar-2019 12:00:00, NaN  
27-Mar-2019 13:00:00, NaN  
27-Mar-2019 14:00:00, NaN  
27-Mar-2019 15:00:00, NaN  
27-Mar-2019 16:00:00, NaN  
27-Mar-2019 17:00:00, NaN  
27-Mar-2019 18:00:00, NaN  
27-Mar-2019 19:00:00, NaN  
27-Mar-2019 20:00:00, NaN  
27-Mar-2019 21:00:00, NaN  
27-Mar-2019 22:00:00, NaN  
27-Mar-2019 23:00:00, NaN  
28-Mar-2019, NaN  
28-Mar-2019 01:00:00, NaN  
28-Mar-2019 02:00:00, NaN  
28-Mar-2019 03:00:00, NaN  
28-Mar-2019 04:00:00, NaN  
28-Mar-2019 05:00:00, NaN  
28-Mar-2019 06:00:00, NaN  
28-Mar-2019 07:00:00, NaN  
28-Mar-2019 08:00:00, NaN  
28-Mar-2019 09:00:00, NaN  
28-Mar-2019 10:00:00, NaN  
28-Mar-2019 11:00:00, NaN  
28-Mar-2019 12:00:00, NaN  
28-Mar-2019 13:00:00, NaN  
28-Mar-2019 14:00:00, NaN  
28-Mar-2019 15:00:00, NaN  
28-Mar-2019 16:00:00, NaN  
28-Mar-2019 17:00:00, NaN  
28-Mar-2019 18:00:00, NaN  
28-Mar-2019 19:00:00, NaN  
28-Mar-2019 20:00:00, NaN  
28-Mar-2019 21:00:00, NaN  
28-Mar-2019 22:00:00, NaN  
28-Mar-2019 23:00:00, NaN  
29-Mar-2019, NaN  
29-Mar-2019 01:00:00, NaN  
29-Mar-2019 02:00:00, NaN  
29-Mar-2019 03:00:00, NaN  
29-Mar-2019 04:00:00, NaN  
29-Mar-2019 05:00:00, NaN  
29-Mar-2019 06:00:00, NaN  
29-Mar-2019 07:00:00, NaN

29-Mar-2019 08:00:00, NaN  
29-Mar-2019 09:00:00, NaN  
29-Mar-2019 10:00:00, NaN  
29-Mar-2019 11:00:00, NaN  
29-Mar-2019 12:00:00, NaN  
29-Mar-2019 13:00:00, NaN  
29-Mar-2019 14:00:00, NaN  
29-Mar-2019 15:00:00, NaN  
29-Mar-2019 16:00:00, NaN  
29-Mar-2019 17:00:00, NaN  
29-Mar-2019 18:00:00, NaN  
29-Mar-2019 19:00:00, NaN  
29-Mar-2019 20:00:00, NaN  
29-Mar-2019 21:00:00, NaN  
29-Mar-2019 22:00:00, NaN  
29-Mar-2019 23:00:00, NaN  
30-Mar-2019, NaN  
30-Mar-2019 01:00:00, NaN  
30-Mar-2019 02:00:00, NaN  
30-Mar-2019 03:00:00, NaN  
30-Mar-2019 04:00:00, NaN  
30-Mar-2019 05:00:00, NaN  
30-Mar-2019 06:00:00, NaN  
30-Mar-2019 07:00:00, NaN  
30-Mar-2019 08:00:00, NaN  
30-Mar-2019 09:00:00, NaN  
30-Mar-2019 10:00:00, NaN  
30-Mar-2019 11:00:00, NaN  
30-Mar-2019 12:00:00, NaN  
30-Mar-2019 13:00:00, NaN  
30-Mar-2019 14:00:00, NaN  
30-Mar-2019 15:00:00, NaN  
30-Mar-2019 16:00:00, NaN  
30-Mar-2019 17:00:00, NaN  
30-Mar-2019 18:00:00, NaN  
30-Mar-2019 19:00:00, NaN  
30-Mar-2019 20:00:00, NaN  
30-Mar-2019 21:00:00, NaN  
30-Mar-2019 22:00:00, NaN  
30-Mar-2019 23:00:00, NaN  
31-Mar-2019, NaN  
31-Mar-2019 01:00:00, NaN  
31-Mar-2019 02:00:00, NaN  
31-Mar-2019 03:00:00, NaN  
31-Mar-2019 04:00:00, NaN  
31-Mar-2019 05:00:00, NaN  
31-Mar-2019 06:00:00, NaN  
31-Mar-2019 07:00:00, NaN  
31-Mar-2019 08:00:00, NaN  
31-Mar-2019 09:00:00, NaN  
31-Mar-2019 10:00:00, NaN  
31-Mar-2019 11:00:00, NaN  
31-Mar-2019 12:00:00, NaN  
31-Mar-2019 13:00:00, NaN  
31-Mar-2019 14:00:00, NaN  
31-Mar-2019 15:00:00, NaN  
31-Mar-2019 16:00:00, NaN  
31-Mar-2019 17:00:00, NaN  
31-Mar-2019 18:00:00, NaN  
31-Mar-2019 19:00:00, NaN  
31-Mar-2019 20:00:00, NaN  
31-Mar-2019 21:00:00, NaN  
31-Mar-2019 22:00:00, NaN  
31-Mar-2019 23:00:00, NaN

01-Apr-2019, NaN  
01-Apr-2019 01:00:00, NaN  
01-Apr-2019 02:00:00, NaN  
01-Apr-2019 03:00:00, NaN  
01-Apr-2019 04:00:00, NaN  
01-Apr-2019 05:00:00, NaN  
01-Apr-2019 06:00:00, NaN  
01-Apr-2019 07:00:00, NaN  
01-Apr-2019 08:00:00, NaN  
01-Apr-2019 09:00:00, NaN  
01-Apr-2019 10:00:00, NaN  
01-Apr-2019 11:00:00, NaN  
01-Apr-2019 12:00:00, NaN  
01-Apr-2019 13:00:00, NaN  
01-Apr-2019 14:00:00, NaN  
01-Apr-2019 15:00:00, NaN  
01-Apr-2019 16:00:00, NaN  
01-Apr-2019 17:00:00, NaN  
01-Apr-2019 18:00:00, NaN  
01-Apr-2019 19:00:00, NaN  
01-Apr-2019 20:00:00, NaN  
01-Apr-2019 21:00:00, NaN  
01-Apr-2019 22:00:00, NaN  
01-Apr-2019 23:00:00, NaN  
02-Apr-2019, NaN  
02-Apr-2019 01:00:00, NaN  
02-Apr-2019 02:00:00, NaN  
02-Apr-2019 03:00:00, NaN  
02-Apr-2019 04:00:00, NaN  
02-Apr-2019 05:00:00, NaN  
02-Apr-2019 06:00:00, NaN  
02-Apr-2019 07:00:00, NaN  
02-Apr-2019 08:00:00, NaN  
02-Apr-2019 09:00:00, NaN  
02-Apr-2019 10:00:00, NaN  
02-Apr-2019 11:00:00, NaN  
02-Apr-2019 12:00:00, NaN  
02-Apr-2019 13:00:00, NaN  
02-Apr-2019 14:00:00, NaN  
02-Apr-2019 15:00:00, NaN  
02-Apr-2019 16:00:00, NaN  
02-Apr-2019 17:00:00, NaN  
02-Apr-2019 18:00:00, NaN  
02-Apr-2019 19:00:00, NaN  
02-Apr-2019 20:00:00, NaN  
02-Apr-2019 21:00:00, NaN  
02-Apr-2019 22:00:00, NaN  
02-Apr-2019 23:00:00, NaN  
03-Apr-2019, NaN  
03-Apr-2019 01:00:00, NaN  
03-Apr-2019 02:00:00, NaN  
03-Apr-2019 03:00:00, NaN  
03-Apr-2019 04:00:00, NaN  
03-Apr-2019 05:00:00, NaN  
03-Apr-2019 06:00:00, NaN  
03-Apr-2019 07:00:00, NaN  
03-Apr-2019 08:00:00, NaN  
03-Apr-2019 09:00:00, NaN  
03-Apr-2019 10:00:00, NaN  
03-Apr-2019 11:00:00, NaN  
03-Apr-2019 12:00:00, NaN  
03-Apr-2019 13:00:00, NaN  
03-Apr-2019 14:00:00, NaN  
03-Apr-2019 15:00:00, NaN

03-Apr-2019 16:00:00, NaN  
03-Apr-2019 17:00:00, NaN  
03-Apr-2019 18:00:00, NaN  
03-Apr-2019 19:00:00, NaN  
03-Apr-2019 20:00:00, NaN  
03-Apr-2019 21:00:00, NaN  
03-Apr-2019 22:00:00, NaN  
03-Apr-2019 23:00:00, NaN  
04-Apr-2019, NaN  
04-Apr-2019 01:00:00, NaN  
04-Apr-2019 02:00:00, NaN  
04-Apr-2019 03:00:00, NaN  
04-Apr-2019 04:00:00, NaN  
04-Apr-2019 05:00:00, NaN  
04-Apr-2019 06:00:00, NaN  
04-Apr-2019 07:00:00, NaN  
04-Apr-2019 08:00:00, NaN  
04-Apr-2019 09:00:00, NaN  
04-Apr-2019 10:00:00, NaN  
04-Apr-2019 11:00:00, NaN  
04-Apr-2019 12:00:00, NaN  
04-Apr-2019 13:00:00, NaN  
04-Apr-2019 14:00:00, NaN  
04-Apr-2019 15:00:00, NaN  
04-Apr-2019 16:00:00, NaN  
04-Apr-2019 17:00:00, NaN  
04-Apr-2019 18:00:00, NaN  
04-Apr-2019 19:00:00, NaN  
04-Apr-2019 20:00:00, NaN  
04-Apr-2019 21:00:00, NaN  
04-Apr-2019 22:00:00, NaN  
04-Apr-2019 23:00:00, NaN  
05-Apr-2019, NaN  
05-Apr-2019 01:00:00, NaN  
05-Apr-2019 02:00:00, NaN  
05-Apr-2019 03:00:00, NaN  
05-Apr-2019 04:00:00, NaN  
05-Apr-2019 05:00:00, NaN  
05-Apr-2019 06:00:00, NaN  
05-Apr-2019 07:00:00, NaN  
05-Apr-2019 08:00:00, NaN  
05-Apr-2019 09:00:00, NaN  
05-Apr-2019 10:00:00, NaN  
05-Apr-2019 11:00:00, NaN  
05-Apr-2019 12:00:00, NaN  
05-Apr-2019 13:00:00, NaN  
05-Apr-2019 14:00:00, NaN  
05-Apr-2019 15:00:00, NaN  
05-Apr-2019 16:00:00, NaN  
05-Apr-2019 17:00:00, NaN  
05-Apr-2019 18:00:00, NaN  
05-Apr-2019 19:00:00, NaN  
05-Apr-2019 20:00:00, NaN  
05-Apr-2019 21:00:00, NaN  
05-Apr-2019 22:00:00, NaN  
05-Apr-2019 23:00:00, NaN  
06-Apr-2019, NaN  
06-Apr-2019 01:00:00, NaN  
06-Apr-2019 02:00:00, NaN  
06-Apr-2019 03:00:00, NaN  
06-Apr-2019 04:00:00, NaN  
06-Apr-2019 05:00:00, NaN  
06-Apr-2019 06:00:00, NaN  
06-Apr-2019 07:00:00, NaN



06-Apr-2019 08:00:00, NaN  
06-Apr-2019 09:00:00, NaN  
06-Apr-2019 10:00:00, NaN  
06-Apr-2019 11:00:00, NaN  
06-Apr-2019 12:00:00, NaN  
06-Apr-2019 13:00:00, NaN  
06-Apr-2019 14:00:00, NaN  
06-Apr-2019 15:00:00, NaN  
06-Apr-2019 16:00:00, NaN  
06-Apr-2019 17:00:00, NaN  
06-Apr-2019 18:00:00, NaN  
06-Apr-2019 19:00:00, NaN  
06-Apr-2019 20:00:00, NaN  
06-Apr-2019 21:00:00, NaN  
06-Apr-2019 22:00:00, NaN  
06-Apr-2019 23:00:00, NaN  
07-Apr-2019, NaN  
07-Apr-2019 01:00:00, NaN  
07-Apr-2019 02:00:00, NaN  
07-Apr-2019 03:00:00, NaN  
07-Apr-2019 04:00:00, NaN  
07-Apr-2019 05:00:00, NaN  
07-Apr-2019 06:00:00, NaN  
07-Apr-2019 07:00:00, NaN  
07-Apr-2019 08:00:00, NaN  
07-Apr-2019 09:00:00, NaN  
07-Apr-2019 10:00:00, NaN  
07-Apr-2019 11:00:00, NaN  
07-Apr-2019 12:00:00, NaN  
07-Apr-2019 13:00:00, NaN  
07-Apr-2019 14:00:00, NaN  
07-Apr-2019 15:00:00, NaN  
07-Apr-2019 16:00:00, NaN  
07-Apr-2019 17:00:00, NaN  
07-Apr-2019 18:00:00, NaN  
07-Apr-2019 19:00:00, NaN  
07-Apr-2019 20:00:00, NaN  
07-Apr-2019 21:00:00, NaN  
07-Apr-2019 22:00:00, NaN  
07-Apr-2019 23:00:00, NaN  
08-Apr-2019, NaN  
08-Apr-2019 01:00:00, NaN  
08-Apr-2019 02:00:00, NaN  
08-Apr-2019 03:00:00, NaN  
08-Apr-2019 04:00:00, NaN  
08-Apr-2019 05:00:00, NaN  
08-Apr-2019 06:00:00, NaN  
08-Apr-2019 07:00:00, NaN  
08-Apr-2019 08:00:00, NaN  
08-Apr-2019 09:00:00, NaN  
08-Apr-2019 10:00:00, NaN  
08-Apr-2019 11:00:00, NaN  
08-Apr-2019 12:00:00, NaN  
08-Apr-2019 13:00:00, NaN  
08-Apr-2019 14:00:00, NaN  
08-Apr-2019 15:00:00, NaN  
08-Apr-2019 16:00:00, NaN  
08-Apr-2019 17:00:00, NaN  
08-Apr-2019 18:00:00, NaN  
08-Apr-2019 19:00:00, NaN  
08-Apr-2019 20:00:00, NaN  
08-Apr-2019 21:00:00, NaN  
08-Apr-2019 22:00:00, NaN  
08-Apr-2019 23:00:00, NaN

09-Apr-2019, NaN  
09-Apr-2019 01:00:00, NaN  
09-Apr-2019 02:00:00, NaN  
09-Apr-2019 03:00:00, NaN  
09-Apr-2019 04:00:00, NaN  
09-Apr-2019 05:00:00, NaN  
09-Apr-2019 06:00:00, NaN  
09-Apr-2019 07:00:00, NaN  
09-Apr-2019 08:00:00, NaN  
09-Apr-2019 09:00:00, NaN  
09-Apr-2019 10:00:00, NaN  
09-Apr-2019 11:00:00, NaN  
09-Apr-2019 12:00:00, NaN  
09-Apr-2019 13:00:00, NaN  
09-Apr-2019 14:00:00, NaN  
09-Apr-2019 15:00:00, NaN  
09-Apr-2019 16:00:00, NaN  
09-Apr-2019 17:00:00, NaN  
09-Apr-2019 18:00:00, NaN  
09-Apr-2019 19:00:00, NaN  
09-Apr-2019 20:00:00, NaN  
09-Apr-2019 21:00:00, NaN  
09-Apr-2019 22:00:00, NaN  
09-Apr-2019 23:00:00, NaN  
10-Apr-2019, NaN  
10-Apr-2019 01:00:00, NaN  
10-Apr-2019 02:00:00, NaN  
10-Apr-2019 03:00:00, NaN  
10-Apr-2019 04:00:00, NaN  
10-Apr-2019 05:00:00, NaN  
10-Apr-2019 06:00:00, NaN  
10-Apr-2019 07:00:00, NaN  
10-Apr-2019 08:00:00, NaN  
10-Apr-2019 09:00:00, NaN  
10-Apr-2019 10:00:00, NaN  
10-Apr-2019 11:00:00, NaN  
10-Apr-2019 12:00:00, NaN  
10-Apr-2019 13:00:00, NaN  
10-Apr-2019 14:00:00, NaN  
10-Apr-2019 15:00:00, NaN  
10-Apr-2019 16:00:00, NaN  
10-Apr-2019 17:00:00, NaN  
10-Apr-2019 18:00:00, NaN  
10-Apr-2019 19:00:00, NaN  
10-Apr-2019 20:00:00, NaN  
10-Apr-2019 21:00:00, NaN  
10-Apr-2019 22:00:00, NaN  
10-Apr-2019 23:00:00, NaN  
11-Apr-2019, NaN  
11-Apr-2019 01:00:00, NaN  
11-Apr-2019 02:00:00, NaN  
11-Apr-2019 03:00:00, NaN  
11-Apr-2019 04:00:00, NaN  
11-Apr-2019 05:00:00, NaN  
11-Apr-2019 06:00:00, NaN  
11-Apr-2019 07:00:00, NaN  
11-Apr-2019 08:00:00, NaN  
11-Apr-2019 09:00:00, NaN  
11-Apr-2019 10:00:00, NaN  
11-Apr-2019 11:00:00, NaN  
11-Apr-2019 12:00:00, NaN  
11-Apr-2019 13:00:00, NaN  
11-Apr-2019 14:00:00, NaN  
11-Apr-2019 15:00:00, NaN

11-Apr-2019 16:00:00, NaN  
11-Apr-2019 17:00:00, NaN  
11-Apr-2019 18:00:00, NaN  
11-Apr-2019 19:00:00, NaN  
11-Apr-2019 20:00:00, NaN  
11-Apr-2019 21:00:00, NaN  
11-Apr-2019 22:00:00, NaN  
11-Apr-2019 23:00:00, NaN  
12-Apr-2019, NaN  
12-Apr-2019 01:00:00, NaN  
12-Apr-2019 02:00:00, NaN  
12-Apr-2019 03:00:00, NaN  
12-Apr-2019 04:00:00, NaN  
12-Apr-2019 05:00:00, NaN  
12-Apr-2019 06:00:00, NaN  
12-Apr-2019 07:00:00, NaN  
12-Apr-2019 08:00:00, NaN  
12-Apr-2019 09:00:00, NaN  
12-Apr-2019 10:00:00, NaN  
12-Apr-2019 11:00:00, NaN  
12-Apr-2019 12:00:00, NaN  
12-Apr-2019 13:00:00, NaN  
12-Apr-2019 14:00:00, NaN  
12-Apr-2019 15:00:00, NaN  
12-Apr-2019 16:00:00, NaN  
12-Apr-2019 17:00:00, NaN  
12-Apr-2019 18:00:00, NaN  
12-Apr-2019 19:00:00, NaN  
12-Apr-2019 20:00:00, NaN  
12-Apr-2019 21:00:00, NaN  
12-Apr-2019 22:00:00, NaN  
12-Apr-2019 23:00:00, NaN  
13-Apr-2019, NaN  
13-Apr-2019 01:00:00, NaN  
13-Apr-2019 02:00:00, NaN  
13-Apr-2019 03:00:00, NaN  
13-Apr-2019 04:00:00, NaN  
13-Apr-2019 05:00:00, NaN  
13-Apr-2019 06:00:00, NaN  
13-Apr-2019 07:00:00, NaN  
13-Apr-2019 08:00:00, NaN  
13-Apr-2019 09:00:00, NaN  
13-Apr-2019 10:00:00, NaN  
13-Apr-2019 11:00:00, NaN  
13-Apr-2019 12:00:00, NaN  
13-Apr-2019 13:00:00, NaN  
13-Apr-2019 14:00:00, NaN  
13-Apr-2019 15:00:00, NaN  
13-Apr-2019 16:00:00, NaN  
13-Apr-2019 17:00:00, NaN  
13-Apr-2019 18:00:00, NaN  
13-Apr-2019 19:00:00, NaN  
13-Apr-2019 20:00:00, NaN  
13-Apr-2019 21:00:00, NaN  
13-Apr-2019 22:00:00, NaN  
13-Apr-2019 23:00:00, NaN  
14-Apr-2019, NaN  
14-Apr-2019 01:00:00, NaN  
14-Apr-2019 02:00:00, NaN  
14-Apr-2019 03:00:00, NaN  
14-Apr-2019 04:00:00, NaN  
14-Apr-2019 05:00:00, NaN  
14-Apr-2019 06:00:00, NaN  
14-Apr-2019 07:00:00, NaN

14-Apr-2019 08:00:00, NaN  
14-Apr-2019 09:00:00, NaN  
14-Apr-2019 10:00:00, NaN  
14-Apr-2019 11:00:00, NaN  
14-Apr-2019 12:00:00, NaN  
14-Apr-2019 13:00:00, NaN  
14-Apr-2019 14:00:00, NaN  
14-Apr-2019 15:00:00, NaN  
14-Apr-2019 16:00:00, NaN  
14-Apr-2019 17:00:00, NaN  
14-Apr-2019 18:00:00, NaN  
14-Apr-2019 19:00:00, NaN  
14-Apr-2019 20:00:00, NaN  
14-Apr-2019 21:00:00, NaN  
14-Apr-2019 22:00:00, NaN  
14-Apr-2019 23:00:00, NaN  
15-Apr-2019, NaN  
15-Apr-2019 01:00:00, NaN  
15-Apr-2019 02:00:00, NaN  
15-Apr-2019 03:00:00, NaN  
15-Apr-2019 04:00:00, NaN  
15-Apr-2019 05:00:00, NaN  
15-Apr-2019 06:00:00, NaN  
15-Apr-2019 07:00:00, NaN  
15-Apr-2019 08:00:00, NaN  
15-Apr-2019 09:00:00, NaN  
15-Apr-2019 10:00:00, NaN  
15-Apr-2019 11:00:00, NaN  
15-Apr-2019 12:00:00, NaN  
15-Apr-2019 13:00:00, NaN  
15-Apr-2019 14:00:00, NaN  
15-Apr-2019 15:00:00, NaN  
15-Apr-2019 16:00:00, NaN  
15-Apr-2019 17:00:00, NaN  
15-Apr-2019 18:00:00, NaN  
15-Apr-2019 19:00:00, NaN  
15-Apr-2019 20:00:00, NaN  
15-Apr-2019 21:00:00, NaN  
15-Apr-2019 22:00:00, NaN  
15-Apr-2019 23:00:00, NaN  
16-Apr-2019, NaN  
16-Apr-2019 01:00:00, NaN  
16-Apr-2019 02:00:00, NaN  
16-Apr-2019 03:00:00, NaN  
16-Apr-2019 04:00:00, NaN  
16-Apr-2019 05:00:00, NaN  
16-Apr-2019 06:00:00, NaN  
16-Apr-2019 07:00:00, NaN  
16-Apr-2019 08:00:00, NaN  
16-Apr-2019 09:00:00, NaN  
16-Apr-2019 10:00:00, NaN  
16-Apr-2019 11:00:00, NaN  
16-Apr-2019 12:00:00, NaN  
16-Apr-2019 13:00:00, NaN  
16-Apr-2019 14:00:00, NaN  
16-Apr-2019 15:00:00, NaN  
16-Apr-2019 16:00:00, NaN  
16-Apr-2019 17:00:00, NaN  
16-Apr-2019 18:00:00, NaN  
16-Apr-2019 19:00:00, NaN  
16-Apr-2019 20:00:00, NaN  
16-Apr-2019 21:00:00, NaN  
16-Apr-2019 22:00:00, NaN  
16-Apr-2019 23:00:00, NaN

17-Apr-2019, NaN  
17-Apr-2019 01:00:00, NaN  
17-Apr-2019 02:00:00, NaN  
17-Apr-2019 03:00:00, NaN  
17-Apr-2019 04:00:00, NaN  
17-Apr-2019 05:00:00, NaN  
17-Apr-2019 06:00:00, NaN  
17-Apr-2019 07:00:00, NaN  
17-Apr-2019 08:00:00, NaN  
17-Apr-2019 09:00:00, NaN  
17-Apr-2019 10:00:00, NaN  
17-Apr-2019 11:00:00, NaN  
17-Apr-2019 12:00:00, NaN  
17-Apr-2019 13:00:00, NaN  
17-Apr-2019 14:00:00, NaN  
17-Apr-2019 15:00:00, NaN  
17-Apr-2019 16:00:00, NaN  
17-Apr-2019 17:00:00, NaN  
17-Apr-2019 18:00:00, NaN  
17-Apr-2019 19:00:00, NaN  
17-Apr-2019 20:00:00, NaN  
17-Apr-2019 21:00:00, NaN  
17-Apr-2019 22:00:00, NaN  
17-Apr-2019 23:00:00, NaN  
18-Apr-2019, NaN  
18-Apr-2019 01:00:00, NaN  
18-Apr-2019 02:00:00, NaN  
18-Apr-2019 03:00:00, NaN  
18-Apr-2019 04:00:00, NaN  
18-Apr-2019 05:00:00, NaN  
18-Apr-2019 06:00:00, NaN  
18-Apr-2019 07:00:00, NaN  
18-Apr-2019 08:00:00, NaN  
18-Apr-2019 09:00:00, NaN  
18-Apr-2019 10:00:00, NaN  
18-Apr-2019 11:00:00, NaN  
18-Apr-2019 12:00:00, NaN  
18-Apr-2019 13:00:00, NaN  
18-Apr-2019 14:00:00, NaN  
18-Apr-2019 15:00:00, NaN  
18-Apr-2019 16:00:00, NaN  
18-Apr-2019 17:00:00, NaN  
18-Apr-2019 18:00:00, NaN  
18-Apr-2019 19:00:00, NaN  
18-Apr-2019 20:00:00, NaN  
18-Apr-2019 21:00:00, NaN  
18-Apr-2019 22:00:00, NaN  
18-Apr-2019 23:00:00, NaN  
19-Apr-2019, NaN  
19-Apr-2019 01:00:00, NaN  
19-Apr-2019 02:00:00, NaN  
19-Apr-2019 03:00:00, NaN  
19-Apr-2019 04:00:00, NaN  
19-Apr-2019 05:00:00, NaN  
19-Apr-2019 06:00:00, NaN  
19-Apr-2019 07:00:00, NaN  
19-Apr-2019 08:00:00, NaN  
19-Apr-2019 09:00:00, NaN  
19-Apr-2019 10:00:00, NaN  
19-Apr-2019 11:00:00, NaN  
19-Apr-2019 12:00:00, NaN  
19-Apr-2019 13:00:00, NaN  
19-Apr-2019 14:00:00, NaN  
19-Apr-2019 15:00:00, NaN

19-Apr-2019 16:00:00, NaN  
19-Apr-2019 17:00:00, NaN  
19-Apr-2019 18:00:00, NaN  
19-Apr-2019 19:00:00, NaN  
19-Apr-2019 20:00:00, NaN  
19-Apr-2019 21:00:00, NaN  
19-Apr-2019 22:00:00, NaN  
19-Apr-2019 23:00:00, NaN  
20-Apr-2019, NaN  
20-Apr-2019 01:00:00, NaN  
20-Apr-2019 02:00:00, NaN  
20-Apr-2019 03:00:00, NaN  
20-Apr-2019 04:00:00, NaN  
20-Apr-2019 05:00:00, NaN  
20-Apr-2019 06:00:00, NaN  
20-Apr-2019 07:00:00, NaN  
20-Apr-2019 08:00:00, NaN  
20-Apr-2019 09:00:00, NaN  
20-Apr-2019 10:00:00, NaN  
20-Apr-2019 11:00:00, NaN  
20-Apr-2019 12:00:00, NaN  
20-Apr-2019 13:00:00, NaN  
20-Apr-2019 14:00:00, NaN  
20-Apr-2019 15:00:00, NaN  
20-Apr-2019 16:00:00, NaN  
20-Apr-2019 17:00:00, NaN  
20-Apr-2019 18:00:00, NaN  
20-Apr-2019 19:00:00, NaN  
20-Apr-2019 20:00:00, NaN  
20-Apr-2019 21:00:00, NaN  
20-Apr-2019 22:00:00, NaN  
20-Apr-2019 23:00:00, NaN  
21-Apr-2019, NaN  
21-Apr-2019 01:00:00, NaN  
21-Apr-2019 02:00:00, NaN  
21-Apr-2019 03:00:00, NaN  
21-Apr-2019 04:00:00, NaN  
21-Apr-2019 05:00:00, NaN  
21-Apr-2019 06:00:00, NaN  
21-Apr-2019 07:00:00, NaN  
21-Apr-2019 08:00:00, NaN  
21-Apr-2019 09:00:00, NaN  
21-Apr-2019 10:00:00, NaN  
21-Apr-2019 11:00:00, NaN  
21-Apr-2019 12:00:00, NaN  
21-Apr-2019 13:00:00, NaN  
21-Apr-2019 14:00:00, NaN  
21-Apr-2019 15:00:00, NaN  
21-Apr-2019 16:00:00, NaN  
21-Apr-2019 17:00:00, NaN  
21-Apr-2019 18:00:00, NaN  
21-Apr-2019 19:00:00, NaN  
21-Apr-2019 20:00:00, NaN  
21-Apr-2019 21:00:00, NaN  
21-Apr-2019 22:00:00, NaN  
21-Apr-2019 23:00:00, NaN  
22-Apr-2019, NaN  
22-Apr-2019 01:00:00, NaN  
22-Apr-2019 02:00:00, NaN  
22-Apr-2019 03:00:00, NaN  
22-Apr-2019 04:00:00, NaN  
22-Apr-2019 05:00:00, NaN  
22-Apr-2019 06:00:00, NaN  
22-Apr-2019 07:00:00, NaN

22-Apr-2019 08:00:00, NaN  
22-Apr-2019 09:00:00, NaN  
22-Apr-2019 10:00:00, NaN  
22-Apr-2019 11:00:00, NaN  
22-Apr-2019 12:00:00, NaN  
22-Apr-2019 13:00:00, NaN  
22-Apr-2019 14:00:00, NaN  
22-Apr-2019 15:00:00, NaN  
22-Apr-2019 16:00:00, NaN  
22-Apr-2019 17:00:00, NaN  
22-Apr-2019 18:00:00, NaN  
22-Apr-2019 19:00:00, NaN  
22-Apr-2019 20:00:00, NaN  
22-Apr-2019 21:00:00, NaN  
22-Apr-2019 22:00:00, NaN  
22-Apr-2019 23:00:00, NaN  
23-Apr-2019, NaN  
23-Apr-2019 01:00:00, NaN  
23-Apr-2019 02:00:00, NaN  
23-Apr-2019 03:00:00, NaN  
23-Apr-2019 04:00:00, NaN  
23-Apr-2019 05:00:00, NaN  
23-Apr-2019 06:00:00, NaN  
23-Apr-2019 07:00:00, NaN  
23-Apr-2019 08:00:00, NaN  
23-Apr-2019 09:00:00, NaN  
23-Apr-2019 10:00:00, NaN  
23-Apr-2019 11:00:00, NaN  
23-Apr-2019 12:00:00, NaN  
23-Apr-2019 13:00:00, NaN  
23-Apr-2019 14:00:00, NaN  
23-Apr-2019 15:00:00, NaN  
23-Apr-2019 16:00:00, NaN  
23-Apr-2019 17:00:00, NaN  
23-Apr-2019 18:00:00, NaN  
23-Apr-2019 19:00:00, NaN  
23-Apr-2019 20:00:00, NaN  
23-Apr-2019 21:00:00, NaN  
23-Apr-2019 22:00:00, NaN  
23-Apr-2019 23:00:00, NaN  
24-Apr-2019, NaN  
24-Apr-2019 01:00:00, NaN  
24-Apr-2019 02:00:00, NaN  
24-Apr-2019 03:00:00, NaN  
24-Apr-2019 04:00:00, NaN  
24-Apr-2019 05:00:00, NaN  
24-Apr-2019 06:00:00, NaN  
24-Apr-2019 07:00:00, NaN  
24-Apr-2019 08:00:00, NaN  
24-Apr-2019 09:00:00, NaN  
24-Apr-2019 10:00:00, NaN  
24-Apr-2019 11:00:00, NaN  
24-Apr-2019 12:00:00, NaN  
24-Apr-2019 13:00:00, NaN  
24-Apr-2019 14:00:00, NaN  
24-Apr-2019 15:00:00, NaN  
24-Apr-2019 16:00:00, NaN  
24-Apr-2019 17:00:00, NaN  
24-Apr-2019 18:00:00, NaN  
24-Apr-2019 19:00:00, NaN  
24-Apr-2019 20:00:00, NaN  
24-Apr-2019 21:00:00, NaN  
24-Apr-2019 22:00:00, NaN  
24-Apr-2019 23:00:00, NaN

25-Apr-2019, NaN  
25-Apr-2019 01:00:00, NaN  
25-Apr-2019 02:00:00, NaN  
25-Apr-2019 03:00:00, NaN  
25-Apr-2019 04:00:00, NaN  
25-Apr-2019 05:00:00, NaN  
25-Apr-2019 06:00:00, NaN  
25-Apr-2019 07:00:00, NaN  
25-Apr-2019 08:00:00, NaN  
25-Apr-2019 09:00:00, NaN  
25-Apr-2019 10:00:00, NaN  
25-Apr-2019 11:00:00, NaN  
25-Apr-2019 12:00:00, NaN  
25-Apr-2019 13:00:00, NaN  
25-Apr-2019 14:00:00, NaN  
25-Apr-2019 15:00:00, NaN  
25-Apr-2019 16:00:00, NaN  
25-Apr-2019 17:00:00, NaN  
25-Apr-2019 18:00:00, NaN  
25-Apr-2019 19:00:00, NaN  
25-Apr-2019 20:00:00, NaN  
25-Apr-2019 21:00:00, NaN  
25-Apr-2019 22:00:00, NaN  
25-Apr-2019 23:00:00, NaN  
26-Apr-2019, NaN  
26-Apr-2019 01:00:00, NaN  
26-Apr-2019 02:00:00, NaN  
26-Apr-2019 03:00:00, NaN  
26-Apr-2019 04:00:00, NaN  
26-Apr-2019 05:00:00, NaN  
26-Apr-2019 06:00:00, NaN  
26-Apr-2019 07:00:00, NaN  
26-Apr-2019 08:00:00, NaN  
26-Apr-2019 09:00:00, NaN  
26-Apr-2019 10:00:00, NaN  
26-Apr-2019 11:00:00, NaN  
26-Apr-2019 12:00:00, NaN  
26-Apr-2019 13:00:00, NaN  
26-Apr-2019 14:00:00, NaN  
26-Apr-2019 15:00:00, NaN  
26-Apr-2019 16:00:00, NaN  
26-Apr-2019 17:00:00, NaN  
26-Apr-2019 18:00:00, NaN  
26-Apr-2019 19:00:00, NaN  
26-Apr-2019 20:00:00, NaN  
26-Apr-2019 21:00:00, NaN  
26-Apr-2019 22:00:00, NaN  
26-Apr-2019 23:00:00, NaN  
27-Apr-2019, NaN  
27-Apr-2019 01:00:00, NaN  
27-Apr-2019 02:00:00, NaN  
27-Apr-2019 03:00:00, NaN  
27-Apr-2019 04:00:00, NaN  
27-Apr-2019 05:00:00, NaN  
27-Apr-2019 06:00:00, NaN  
27-Apr-2019 07:00:00, NaN  
27-Apr-2019 08:00:00, NaN  
27-Apr-2019 09:00:00, NaN  
27-Apr-2019 10:00:00, NaN  
27-Apr-2019 11:00:00, NaN  
27-Apr-2019 12:00:00, NaN  
27-Apr-2019 13:00:00, NaN  
27-Apr-2019 14:00:00, NaN  
27-Apr-2019 15:00:00, NaN



27-Apr-2019 16:00:00, NaN  
27-Apr-2019 17:00:00, NaN  
27-Apr-2019 18:00:00, NaN  
27-Apr-2019 19:00:00, NaN  
27-Apr-2019 20:00:00, NaN  
27-Apr-2019 21:00:00, NaN  
27-Apr-2019 22:00:00, NaN  
27-Apr-2019 23:00:00, NaN  
28-Apr-2019, NaN  
28-Apr-2019 01:00:00, NaN  
28-Apr-2019 02:00:00, NaN  
28-Apr-2019 03:00:00, NaN  
28-Apr-2019 04:00:00, NaN  
28-Apr-2019 05:00:00, NaN  
28-Apr-2019 06:00:00, NaN  
28-Apr-2019 07:00:00, NaN  
28-Apr-2019 08:00:00, NaN  
28-Apr-2019 09:00:00, NaN  
28-Apr-2019 10:00:00, NaN  
28-Apr-2019 11:00:00, NaN  
28-Apr-2019 12:00:00, NaN  
28-Apr-2019 13:00:00, NaN  
28-Apr-2019 14:00:00, NaN  
28-Apr-2019 15:00:00, NaN  
28-Apr-2019 16:00:00, NaN  
28-Apr-2019 17:00:00, NaN  
28-Apr-2019 18:00:00, NaN  
28-Apr-2019 19:00:00, NaN  
28-Apr-2019 20:00:00, NaN  
28-Apr-2019 21:00:00, NaN  
28-Apr-2019 22:00:00, NaN  
28-Apr-2019 23:00:00, NaN  
29-Apr-2019, NaN  
29-Apr-2019 01:00:00, NaN  
29-Apr-2019 02:00:00, NaN  
29-Apr-2019 03:00:00, NaN  
29-Apr-2019 04:00:00, NaN  
29-Apr-2019 05:00:00, NaN  
29-Apr-2019 06:00:00, NaN  
29-Apr-2019 07:00:00, NaN  
29-Apr-2019 08:00:00, NaN  
29-Apr-2019 09:00:00, NaN  
29-Apr-2019 10:00:00, NaN  
29-Apr-2019 11:00:00, NaN  
29-Apr-2019 12:00:00, NaN  
29-Apr-2019 13:00:00, NaN  
29-Apr-2019 14:00:00, NaN  
29-Apr-2019 15:00:00, NaN  
29-Apr-2019 16:00:00, NaN  
29-Apr-2019 17:00:00, NaN  
29-Apr-2019 18:00:00, NaN  
29-Apr-2019 19:00:00, NaN  
29-Apr-2019 20:00:00, NaN  
29-Apr-2019 21:00:00, NaN  
29-Apr-2019 22:00:00, NaN  
29-Apr-2019 23:00:00, NaN  
30-Apr-2019, NaN  
30-Apr-2019 01:00:00, NaN  
30-Apr-2019 02:00:00, NaN  
30-Apr-2019 03:00:00, NaN  
30-Apr-2019 04:00:00, NaN  
30-Apr-2019 05:00:00, NaN  
30-Apr-2019 06:00:00, NaN  
30-Apr-2019 07:00:00, NaN

30-Apr-2019 08:00:00, NaN  
30-Apr-2019 09:00:00, NaN  
30-Apr-2019 10:00:00, NaN  
30-Apr-2019 11:00:00, NaN  
30-Apr-2019 12:00:00, NaN  
30-Apr-2019 13:00:00, NaN  
30-Apr-2019 14:00:00, NaN  
30-Apr-2019 15:00:00, NaN  
30-Apr-2019 16:00:00, NaN  
30-Apr-2019 17:00:00, NaN  
30-Apr-2019 18:00:00, NaN  
30-Apr-2019 19:00:00, NaN  
30-Apr-2019 20:00:00, NaN  
30-Apr-2019 21:00:00, NaN  
30-Apr-2019 22:00:00, NaN  
30-Apr-2019 23:00:00, NaN  
01-May-2019, NaN  
01-May-2019 01:00:00, NaN  
01-May-2019 02:00:00, NaN  
01-May-2019 03:00:00, NaN  
01-May-2019 04:00:00, NaN  
01-May-2019 05:00:00, NaN  
01-May-2019 06:00:00, NaN  
01-May-2019 07:00:00, NaN  
01-May-2019 08:00:00, NaN  
01-May-2019 09:00:00, NaN  
01-May-2019 10:00:00, NaN  
01-May-2019 11:00:00, NaN  
01-May-2019 12:00:00, NaN  
01-May-2019 13:00:00, NaN  
01-May-2019 14:00:00, NaN  
01-May-2019 15:00:00, NaN  
01-May-2019 16:00:00, NaN  
01-May-2019 17:00:00, NaN  
01-May-2019 18:00:00, NaN  
01-May-2019 19:00:00, NaN  
01-May-2019 20:00:00, NaN  
01-May-2019 21:00:00, NaN  
01-May-2019 22:00:00, NaN  
01-May-2019 23:00:00, NaN  
02-May-2019, NaN  
02-May-2019 01:00:00, NaN  
02-May-2019 02:00:00, NaN  
02-May-2019 03:00:00, NaN  
02-May-2019 04:00:00, NaN  
02-May-2019 05:00:00, NaN  
02-May-2019 06:00:00, NaN  
02-May-2019 07:00:00, NaN  
02-May-2019 08:00:00, NaN  
02-May-2019 09:00:00, NaN  
02-May-2019 10:00:00, NaN  
02-May-2019 11:00:00, NaN  
02-May-2019 12:00:00, NaN  
02-May-2019 13:00:00, NaN  
02-May-2019 14:00:00, NaN  
02-May-2019 15:00:00, NaN  
02-May-2019 16:00:00, NaN  
02-May-2019 17:00:00, NaN  
02-May-2019 18:00:00, NaN  
02-May-2019 19:00:00, NaN  
02-May-2019 20:00:00, NaN  
02-May-2019 21:00:00, NaN  
02-May-2019 22:00:00, NaN  
02-May-2019 23:00:00, NaN

03-May-2019, NaN  
03-May-2019 01:00:00, NaN  
03-May-2019 02:00:00, NaN  
03-May-2019 03:00:00, NaN  
03-May-2019 04:00:00, NaN  
03-May-2019 05:00:00, NaN  
03-May-2019 06:00:00, NaN  
03-May-2019 07:00:00, NaN  
03-May-2019 08:00:00, NaN  
03-May-2019 09:00:00, NaN  
03-May-2019 10:00:00, NaN  
03-May-2019 11:00:00, NaN  
03-May-2019 12:00:00, NaN  
03-May-2019 13:00:00, NaN  
03-May-2019 14:00:00, NaN  
03-May-2019 15:00:00, NaN  
03-May-2019 16:00:00, NaN  
03-May-2019 17:00:00, NaN  
03-May-2019 18:00:00, NaN  
03-May-2019 19:00:00, NaN  
03-May-2019 20:00:00, NaN  
03-May-2019 21:00:00, NaN  
03-May-2019 22:00:00, NaN  
03-May-2019 23:00:00, NaN  
04-May-2019, NaN  
04-May-2019 01:00:00, NaN  
04-May-2019 02:00:00, NaN  
04-May-2019 03:00:00, NaN  
04-May-2019 04:00:00, NaN  
04-May-2019 05:00:00, NaN  
04-May-2019 06:00:00, NaN  
04-May-2019 07:00:00, NaN  
04-May-2019 08:00:00, NaN  
04-May-2019 09:00:00, NaN  
04-May-2019 10:00:00, NaN  
04-May-2019 11:00:00, NaN  
04-May-2019 12:00:00, NaN  
04-May-2019 13:00:00, NaN  
04-May-2019 14:00:00, NaN  
04-May-2019 15:00:00, NaN  
04-May-2019 16:00:00, NaN  
04-May-2019 17:00:00, NaN  
04-May-2019 18:00:00, NaN  
04-May-2019 19:00:00, NaN  
04-May-2019 20:00:00, NaN  
04-May-2019 21:00:00, NaN  
04-May-2019 22:00:00, NaN  
04-May-2019 23:00:00, NaN  
05-May-2019, NaN  
05-May-2019 01:00:00, NaN  
05-May-2019 02:00:00, NaN  
05-May-2019 03:00:00, NaN  
05-May-2019 04:00:00, NaN  
05-May-2019 05:00:00, NaN  
05-May-2019 06:00:00, NaN  
05-May-2019 07:00:00, NaN  
05-May-2019 08:00:00, NaN  
05-May-2019 09:00:00, NaN  
05-May-2019 10:00:00, NaN  
05-May-2019 11:00:00, NaN  
05-May-2019 12:00:00, NaN  
05-May-2019 13:00:00, NaN  
05-May-2019 14:00:00, NaN  
05-May-2019 15:00:00, NaN

05-May-2019 16:00:00, NaN  
05-May-2019 17:00:00, NaN  
05-May-2019 18:00:00, NaN  
05-May-2019 19:00:00, NaN  
05-May-2019 20:00:00, NaN  
05-May-2019 21:00:00, NaN  
05-May-2019 22:00:00, NaN  
05-May-2019 23:00:00, NaN  
06-May-2019, NaN  
06-May-2019 01:00:00, NaN  
06-May-2019 02:00:00, NaN  
06-May-2019 03:00:00, NaN  
06-May-2019 04:00:00, NaN  
06-May-2019 05:00:00, NaN  
06-May-2019 06:00:00, NaN  
06-May-2019 07:00:00, NaN  
06-May-2019 08:00:00, NaN  
06-May-2019 09:00:00, NaN  
06-May-2019 10:00:00, NaN  
06-May-2019 11:00:00, NaN  
06-May-2019 12:00:00, NaN  
06-May-2019 13:00:00, NaN  
06-May-2019 14:00:00, NaN  
06-May-2019 15:00:00, NaN  
06-May-2019 16:00:00, NaN  
06-May-2019 17:00:00, NaN  
06-May-2019 18:00:00, NaN  
06-May-2019 19:00:00, NaN  
06-May-2019 20:00:00, NaN  
06-May-2019 21:00:00, NaN  
06-May-2019 22:00:00, NaN  
06-May-2019 23:00:00, NaN  
07-May-2019, NaN  
07-May-2019 01:00:00, NaN  
07-May-2019 02:00:00, NaN  
07-May-2019 03:00:00, NaN  
07-May-2019 04:00:00, NaN  
07-May-2019 05:00:00, NaN  
07-May-2019 06:00:00, NaN  
07-May-2019 07:00:00, NaN  
07-May-2019 08:00:00, NaN  
07-May-2019 09:00:00, NaN  
07-May-2019 10:00:00, NaN  
07-May-2019 11:00:00, NaN  
07-May-2019 12:00:00, NaN  
07-May-2019 13:00:00, NaN  
07-May-2019 14:00:00, NaN  
07-May-2019 15:00:00, NaN  
07-May-2019 16:00:00, NaN  
07-May-2019 17:00:00, NaN  
07-May-2019 18:00:00, NaN  
07-May-2019 19:00:00, NaN  
07-May-2019 20:00:00, NaN  
07-May-2019 21:00:00, NaN  
07-May-2019 22:00:00, NaN  
07-May-2019 23:00:00, NaN  
08-May-2019, NaN  
08-May-2019 01:00:00, NaN  
08-May-2019 02:00:00, NaN  
08-May-2019 03:00:00, NaN  
08-May-2019 04:00:00, NaN  
08-May-2019 05:00:00, NaN  
08-May-2019 06:00:00, NaN  
08-May-2019 07:00:00, NaN

|              |           |     |
|--------------|-----------|-----|
| 08-May-2019  | 08:00:00, | NaN |
| 08-May-2019  | 09:00:00, | NaN |
| 08-May-2019  | 10:00:00, | NaN |
| 08-May-2019  | 11:00:00, | NaN |
| 08-May-2019  | 12:00:00, | NaN |
| 08-May-2019  | 13:00:00, | NaN |
| 08-May-2019  | 14:00:00, | NaN |
| 08-May-2019  | 15:00:00, | NaN |
| 08-May-2019  | 16:00:00, | NaN |
| 08-May-2019  | 17:00:00, | NaN |
| 08-May-2019  | 18:00:00, | NaN |
| 08-May-2019  | 19:00:00, | NaN |
| 08-May-2019  | 20:00:00, | NaN |
| 08-May-2019  | 21:00:00, | NaN |
| 08-May-2019  | 22:00:00, | NaN |
| 08-May-2019  | 23:00:00, | NaN |
| 09-May-2019, | NaN       |     |
| 09-May-2019  | 01:00:00, | NaN |
| 09-May-2019  | 02:00:00, | NaN |
| 09-May-2019  | 03:00:00, | NaN |
| 09-May-2019  | 04:00:00, | NaN |
| 09-May-2019  | 05:00:00, | NaN |
| 09-May-2019  | 06:00:00, | NaN |
| 09-May-2019  | 07:00:00, | NaN |
| 09-May-2019  | 08:00:00, | NaN |
| 09-May-2019  | 09:00:00, | NaN |
| 09-May-2019  | 10:00:00, | NaN |
| 09-May-2019  | 11:00:00, | NaN |
| 09-May-2019  | 12:00:00, | NaN |
| 09-May-2019  | 13:00:00, | NaN |
| 09-May-2019  | 14:00:00, | NaN |
| 09-May-2019  | 15:00:00, | NaN |
| 09-May-2019  | 16:00:00, | NaN |
| 09-May-2019  | 17:00:00, | NaN |
| 09-May-2019  | 18:00:00, | NaN |
| 09-May-2019  | 19:00:00, | NaN |
| 09-May-2019  | 20:00:00, | NaN |
| 09-May-2019  | 21:00:00, | NaN |
| 09-May-2019  | 22:00:00, | NaN |
| 09-May-2019  | 23:00:00, | NaN |
| 10-May-2019, | NaN       |     |
| 10-May-2019  | 01:00:00, | NaN |
| 10-May-2019  | 02:00:00, | NaN |
| 10-May-2019  | 03:00:00, | NaN |
| 10-May-2019  | 04:00:00, | NaN |
| 10-May-2019  | 05:00:00, | NaN |
| 10-May-2019  | 06:00:00, | NaN |
| 10-May-2019  | 07:00:00, | NaN |
| 10-May-2019  | 08:00:00, | NaN |
| 10-May-2019  | 09:00:00, | NaN |
| 10-May-2019  | 10:00:00, | NaN |
| 10-May-2019  | 11:00:00, | NaN |
| 10-May-2019  | 12:00:00, | NaN |
| 10-May-2019  | 13:00:00, | NaN |
| 10-May-2019  | 14:00:00, | NaN |
| 10-May-2019  | 15:00:00, | NaN |
| 10-May-2019  | 16:00:00, | NaN |
| 10-May-2019  | 17:00:00, | NaN |
| 10-May-2019  | 18:00:00, | NaN |
| 10-May-2019  | 19:00:00, | NaN |
| 10-May-2019  | 20:00:00, | NaN |
| 10-May-2019  | 21:00:00, | NaN |
| 10-May-2019  | 22:00:00, | NaN |
| 10-May-2019  | 23:00:00, | NaN |

11-May-2019, NaN  
11-May-2019 01:00:00, NaN  
11-May-2019 02:00:00, NaN  
11-May-2019 03:00:00, NaN  
11-May-2019 04:00:00, NaN  
11-May-2019 05:00:00, NaN  
11-May-2019 06:00:00, NaN  
11-May-2019 07:00:00, NaN  
11-May-2019 08:00:00, NaN  
11-May-2019 09:00:00, NaN  
11-May-2019 10:00:00, NaN  
11-May-2019 11:00:00, NaN  
11-May-2019 12:00:00, NaN  
11-May-2019 13:00:00, NaN  
11-May-2019 14:00:00, NaN  
11-May-2019 15:00:00, NaN  
11-May-2019 16:00:00, NaN  
11-May-2019 17:00:00, NaN  
11-May-2019 18:00:00, NaN  
11-May-2019 19:00:00, NaN  
11-May-2019 20:00:00, NaN  
11-May-2019 21:00:00, NaN  
11-May-2019 22:00:00, NaN  
11-May-2019 23:00:00, NaN  
12-May-2019, NaN  
12-May-2019 01:00:00, NaN  
12-May-2019 02:00:00, NaN  
12-May-2019 03:00:00, NaN  
12-May-2019 04:00:00, NaN  
12-May-2019 05:00:00, NaN  
12-May-2019 06:00:00, NaN  
12-May-2019 07:00:00, NaN  
12-May-2019 08:00:00, NaN  
12-May-2019 09:00:00, NaN  
12-May-2019 10:00:00, NaN  
12-May-2019 11:00:00, NaN  
12-May-2019 12:00:00, NaN  
12-May-2019 13:00:00, NaN  
12-May-2019 14:00:00, NaN  
12-May-2019 15:00:00, NaN  
12-May-2019 16:00:00, NaN  
12-May-2019 17:00:00, NaN  
12-May-2019 18:00:00, NaN  
12-May-2019 19:00:00, NaN  
12-May-2019 20:00:00, NaN  
12-May-2019 21:00:00, NaN  
12-May-2019 22:00:00, NaN  
12-May-2019 23:00:00, NaN  
13-May-2019, NaN  
13-May-2019 01:00:00, NaN  
13-May-2019 02:00:00, NaN  
13-May-2019 03:00:00, NaN  
13-May-2019 04:00:00, NaN  
13-May-2019 05:00:00, NaN  
13-May-2019 06:00:00, NaN  
13-May-2019 07:00:00, NaN  
13-May-2019 08:00:00, NaN  
13-May-2019 09:00:00, NaN  
13-May-2019 10:00:00, NaN  
13-May-2019 11:00:00, NaN  
13-May-2019 12:00:00, NaN  
13-May-2019 13:00:00, NaN  
13-May-2019 14:00:00, NaN  
13-May-2019 15:00:00, NaN

13-May-2019 16:00:00, NaN  
13-May-2019 17:00:00, NaN  
13-May-2019 18:00:00, NaN  
13-May-2019 19:00:00, NaN  
13-May-2019 20:00:00, NaN  
13-May-2019 21:00:00, NaN  
13-May-2019 22:00:00, NaN  
13-May-2019 23:00:00, NaN  
14-May-2019, NaN  
14-May-2019 01:00:00, NaN  
14-May-2019 02:00:00, NaN  
14-May-2019 03:00:00, NaN  
14-May-2019 04:00:00, NaN  
14-May-2019 05:00:00, NaN  
14-May-2019 06:00:00, NaN  
14-May-2019 07:00:00, NaN  
14-May-2019 08:00:00, NaN  
14-May-2019 09:00:00, NaN  
14-May-2019 10:00:00, NaN  
14-May-2019 11:00:00, NaN  
14-May-2019 12:00:00, NaN  
14-May-2019 13:00:00, NaN  
14-May-2019 14:00:00, NaN  
14-May-2019 15:00:00, NaN  
14-May-2019 16:00:00, NaN  
14-May-2019 17:00:00, NaN  
14-May-2019 18:00:00, NaN  
14-May-2019 19:00:00, NaN  
14-May-2019 20:00:00, NaN  
14-May-2019 21:00:00, NaN  
14-May-2019 22:00:00, NaN  
14-May-2019 23:00:00, NaN  
15-May-2019, NaN  
15-May-2019 01:00:00, NaN  
15-May-2019 02:00:00, NaN  
15-May-2019 03:00:00, NaN  
15-May-2019 04:00:00, NaN  
15-May-2019 05:00:00, NaN  
15-May-2019 06:00:00, NaN  
15-May-2019 07:00:00, NaN  
15-May-2019 08:00:00, NaN  
15-May-2019 09:00:00, NaN  
15-May-2019 10:00:00, NaN  
15-May-2019 11:00:00, NaN  
15-May-2019 12:00:00, NaN  
15-May-2019 13:00:00, NaN  
15-May-2019 14:00:00, NaN  
15-May-2019 15:00:00, NaN  
15-May-2019 16:00:00, NaN  
15-May-2019 17:00:00, NaN  
15-May-2019 18:00:00, NaN  
15-May-2019 19:00:00, NaN  
15-May-2019 20:00:00, NaN  
15-May-2019 21:00:00, NaN  
15-May-2019 22:00:00, NaN  
15-May-2019 23:00:00, NaN  
16-May-2019, NaN  
16-May-2019 01:00:00, NaN  
16-May-2019 02:00:00, NaN  
16-May-2019 03:00:00, NaN  
16-May-2019 04:00:00, NaN  
16-May-2019 05:00:00, NaN  
16-May-2019 06:00:00, NaN
