# Supplementary material
Source: MDPI journal article supplement (https://www.mdpi.com/2072-4292/12/17/2733)
Supplement: s1 [file s1]

| Name | Latitude    | Longitude    | Zone |
|------|-------------|--------------|------|
| A2-1 | 38.92025272 | -106.9488357 | 4    |
| A2-2 | 38.92028205 | -106.9487786 | 4    |
| A1-1 | 38.92021441 | -106.9486837 | 4    |
| A1-2 | 38.9202656  | -106.9486333 | 4    |
| B1-1 | 38.92030497 | -106.9484184 | 4    |
| B1-2 | 38.92035176 | -106.948345  | 4    |
| B2-1 | 38.92033763 | -106.9484864 | 4    |
| B2-2 | 38.92039429 | -106.9485132 | 4    |
| C1-1 | 38.92039446 | -106.9486608 | 3    |
| C1-2 | 38.9204693  | -106.9486782 | 3    |
| C2-1 | 38.92045273 | -106.9488019 | 3    |
| C2-2 | 38.92047172 | -106.9487664 | 3    |
| F2-1 | 38.92100711 | -106.948078  | 1    |
| F2-2 | 38.92119667 | -106.9479755 | 1    |
| F2-3 | 38.92134673 | -106.947799  | 1    |
| 1-54 | 38.9206     | -106.948623  | 3    |
| 2-3  | 38.920725   | -106.948585  | 2    |
| 2-19 | 38.920901   | -106.948531  | 2    |
| 2-33 | 38.921054   | -106.948476  | 2    |
| 2-40 | 38.921133   | -106.94847   | 2    |
