# Supplementary material
Source: MDPI journal article supplement (https://www.mdpi.com/2072-4292/12/17/2733)
Supplement: s1 [file s1]

time, VWC  
03-Nov-2016 12:00:00, NaN  
03-Nov-2016 18:00:00, NaN  
04-Nov-2016, NaN  
04-Nov-2016 06:00:00, NaN  
04-Nov-2016 12:00:00, NaN  
04-Nov-2016 18:00:00, NaN  
05-Nov-2016, NaN  
05-Nov-2016 06:00:00, NaN  
05-Nov-2016 12:00:00, NaN  
05-Nov-2016 18:00:00, NaN  
06-Nov-2016, NaN  
06-Nov-2016 06:00:00, NaN  
06-Nov-2016 12:00:00, NaN  
06-Nov-2016 18:00:00, NaN  
07-Nov-2016, NaN  
07-Nov-2016 06:00:00, NaN  
07-Nov-2016 12:00:00, NaN  
07-Nov-2016 18:00:00, NaN  
08-Nov-2016, NaN  
08-Nov-2016 06:00:00, NaN  
08-Nov-2016 12:00:00, NaN  
08-Nov-2016 18:00:00, NaN  
09-Nov-2016, NaN  
09-Nov-2016 06:00:00, NaN  
09-Nov-2016 12:00:00, NaN  
09-Nov-2016 18:00:00, NaN  
10-Nov-2016, NaN  
10-Nov-2016 06:00:00, NaN  
10-Nov-2016 12:00:00, NaN  
10-Nov-2016 18:00:00, NaN  
11-Nov-2016, NaN  
11-Nov-2016 06:00:00, NaN  
11-Nov-2016 12:00:00, NaN  
11-Nov-2016 18:00:00, NaN  
12-Nov-2016, NaN  
12-Nov-2016 06:00:00, NaN  
12-Nov-2016 12:00:00, NaN  
12-Nov-2016 18:00:00, NaN  
13-Nov-2016, NaN  
13-Nov-2016 06:00:00, NaN  
13-Nov-2016 12:00:00, NaN  
13-Nov-2016 18:00:00, NaN  
14-Nov-2016, NaN  
14-Nov-2016 06:00:00, NaN  
14-Nov-2016 12:00:00, NaN  
14-Nov-2016 18:00:00, NaN  
15-Nov-2016, NaN  
15-Nov-2016 06:00:00, NaN  
15-Nov-2016 12:00:00, NaN  
15-Nov-2016 18:00:00, NaN  
16-Nov-2016, NaN  
16-Nov-2016 06:00:00, NaN  
16-Nov-2016 12:00:00, NaN  
16-Nov-2016 18:00:00, NaN  
17-Nov-2016, NaN  
17-Nov-2016 06:00:00, NaN  
17-Nov-2016 12:00:00, NaN  
17-Nov-2016 18:00:00, NaN  
18-Nov-2016, NaN  
18-Nov-2016 06:00:00, NaN  
18-Nov-2016 12:00:00, NaN  
18-Nov-2016 18:00:00, NaN  
19-Nov-2016, NaN

|              |           |     |
|--------------|-----------|-----|
| 19-Nov-2016  | 06:00:00, | NaN |
| 19-Nov-2016  | 12:00:00, | NaN |
| 19-Nov-2016  | 18:00:00, | NaN |
| 20-Nov-2016, |           | NaN |
| 20-Nov-2016  | 06:00:00, | NaN |
| 20-Nov-2016  | 12:00:00, | NaN |
| 20-Nov-2016  | 18:00:00, | NaN |
| 21-Nov-2016, |           | NaN |
| 21-Nov-2016  | 06:00:00, | NaN |
| 21-Nov-2016  | 12:00:00, | NaN |
| 21-Nov-2016  | 18:00:00, | NaN |
| 22-Nov-2016, |           | NaN |
| 22-Nov-2016  | 06:00:00, | NaN |
| 22-Nov-2016  | 12:00:00, | NaN |
| 22-Nov-2016  | 18:00:00, | NaN |
| 23-Nov-2016, |           | NaN |
| 23-Nov-2016  | 06:00:00, | NaN |
| 23-Nov-2016  | 12:00:00, | NaN |
| 23-Nov-2016  | 18:00:00, | NaN |
| 24-Nov-2016, |           | NaN |
| 24-Nov-2016  | 06:00:00, | NaN |
| 24-Nov-2016  | 12:00:00, | NaN |
| 24-Nov-2016  | 18:00:00, | NaN |
| 25-Nov-2016, |           | NaN |
| 25-Nov-2016  | 06:00:00, | NaN |
| 25-Nov-2016  | 12:00:00, | NaN |
| 25-Nov-2016  | 18:00:00, | NaN |
| 26-Nov-2016, |           | NaN |
| 26-Nov-2016  | 06:00:00, | NaN |
| 26-Nov-2016  | 12:00:00, | NaN |
| 26-Nov-2016  | 18:00:00, | NaN |
| 27-Nov-2016, |           | NaN |
| 27-Nov-2016  | 06:00:00, | NaN |
| 27-Nov-2016  | 12:00:00, | NaN |
| 27-Nov-2016  | 18:00:00, | NaN |
| 28-Nov-2016, |           | NaN |
| 28-Nov-2016  | 06:00:00, | NaN |
| 28-Nov-2016  | 12:00:00, | NaN |
| 28-Nov-2016  | 18:00:00, | NaN |
| 29-Nov-2016, |           | NaN |
| 29-Nov-2016  | 06:00:00, | NaN |
| 29-Nov-2016  | 12:00:00, | NaN |
| 29-Nov-2016  | 18:00:00, | NaN |
| 30-Nov-2016, |           | NaN |
| 30-Nov-2016  | 06:00:00, | NaN |
| 30-Nov-2016  | 12:00:00, | NaN |
| 30-Nov-2016  | 18:00:00, | NaN |
| 01-Dec-2016, |           | NaN |
| 01-Dec-2016  | 06:00:00, | NaN |
| 01-Dec-2016  | 12:00:00, | NaN |
| 01-Dec-2016  | 18:00:00, | NaN |
| 02-Dec-2016, |           | NaN |
| 02-Dec-2016  | 06:00:00, | NaN |
| 02-Dec-2016  | 12:00:00, | NaN |
| 02-Dec-2016  | 18:00:00, | NaN |
| 03-Dec-2016, |           | NaN |
| 03-Dec-2016  | 06:00:00, | NaN |
| 03-Dec-2016  | 12:00:00, | NaN |
| 03-Dec-2016  | 18:00:00, | NaN |
| 04-Dec-2016, |           | NaN |
| 04-Dec-2016  | 06:00:00, | NaN |
| 04-Dec-2016  | 12:00:00, | NaN |
| 04-Dec-2016  | 18:00:00, | NaN |
| 05-Dec-2016, |           | NaN |

|              |           |     |
|--------------|-----------|-----|
| 05-Dec-2016  | 06:00:00, | NaN |
| 05-Dec-2016  | 12:00:00, | NaN |
| 05-Dec-2016  | 18:00:00, | NaN |
| 06-Dec-2016, |           | NaN |
| 06-Dec-2016  | 06:00:00, | NaN |
| 06-Dec-2016  | 12:00:00, | NaN |
| 06-Dec-2016  | 18:00:00, | NaN |
| 07-Dec-2016, |           | NaN |
| 07-Dec-2016  | 06:00:00, | NaN |
| 07-Dec-2016  | 12:00:00, | NaN |
| 07-Dec-2016  | 18:00:00, | NaN |
| 08-Dec-2016, |           | NaN |
| 08-Dec-2016  | 06:00:00, | NaN |
| 08-Dec-2016  | 12:00:00, | NaN |
| 08-Dec-2016  | 18:00:00, | NaN |
| 09-Dec-2016, |           | NaN |
| 09-Dec-2016  | 06:00:00, | NaN |
| 09-Dec-2016  | 12:00:00, | NaN |
| 09-Dec-2016  | 18:00:00, | NaN |
| 10-Dec-2016, |           | NaN |
| 10-Dec-2016  | 06:00:00, | NaN |
| 10-Dec-2016  | 12:00:00, | NaN |
| 10-Dec-2016  | 18:00:00, | NaN |
| 11-Dec-2016, |           | NaN |
| 11-Dec-2016  | 06:00:00, | NaN |
| 11-Dec-2016  | 12:00:00, | NaN |
| 11-Dec-2016  | 18:00:00, | NaN |
| 12-Dec-2016, |           | NaN |
| 12-Dec-2016  | 06:00:00, | NaN |
| 12-Dec-2016  | 12:00:00, | NaN |
| 12-Dec-2016  | 18:00:00, | NaN |
| 13-Dec-2016, |           | NaN |
| 13-Dec-2016  | 06:00:00, | NaN |
| 13-Dec-2016  | 12:00:00, | NaN |
| 13-Dec-2016  | 18:00:00, | NaN |
| 14-Dec-2016, |           | NaN |
| 14-Dec-2016  | 06:00:00, | NaN |
| 14-Dec-2016  | 12:00:00, | NaN |
| 14-Dec-2016  | 18:00:00, | NaN |
| 15-Dec-2016, |           | NaN |
| 15-Dec-2016  | 06:00:00, | NaN |
| 15-Dec-2016  | 12:00:00, | NaN |
| 15-Dec-2016  | 18:00:00, | NaN |
| 16-Dec-2016, |           | NaN |
| 16-Dec-2016  | 06:00:00, | NaN |
| 16-Dec-2016  | 12:00:00, | NaN |
| 16-Dec-2016  | 18:00:00, | NaN |
| 17-Dec-2016, |           | NaN |
| 17-Dec-2016  | 06:00:00, | NaN |
| 17-Dec-2016  | 12:00:00, | NaN |
| 17-Dec-2016  | 18:00:00, | NaN |
| 18-Dec-2016, |           | NaN |
| 18-Dec-2016  | 06:00:00, | NaN |
| 18-Dec-2016  | 12:00:00, | NaN |
| 18-Dec-2016  | 18:00:00, | NaN |
| 19-Dec-2016, |           | NaN |
| 19-Dec-2016  | 06:00:00, | NaN |
| 19-Dec-2016  | 12:00:00, | NaN |
| 19-Dec-2016  | 18:00:00, | NaN |
| 20-Dec-2016, |           | NaN |
| 20-Dec-2016  | 06:00:00, | NaN |
| 20-Dec-2016  | 12:00:00, | NaN |
| 20-Dec-2016  | 18:00:00, | NaN |
| 21-Dec-2016, |           | NaN |

|              |           |     |
|--------------|-----------|-----|
| 21-Dec-2016  | 06:00:00, | NaN |
| 21-Dec-2016  | 12:00:00, | NaN |
| 21-Dec-2016  | 18:00:00, | NaN |
| 22-Dec-2016, | NaN       |     |
| 22-Dec-2016  | 06:00:00, | NaN |
| 22-Dec-2016  | 12:00:00, | NaN |
| 22-Dec-2016  | 18:00:00, | NaN |
| 23-Dec-2016, | NaN       |     |
| 23-Dec-2016  | 06:00:00, | NaN |
| 23-Dec-2016  | 12:00:00, | NaN |
| 23-Dec-2016  | 18:00:00, | NaN |
| 24-Dec-2016, | NaN       |     |
| 24-Dec-2016  | 06:00:00, | NaN |
| 24-Dec-2016  | 12:00:00, | NaN |
| 24-Dec-2016  | 18:00:00, | NaN |
| 25-Dec-2016, | NaN       |     |
| 25-Dec-2016  | 06:00:00, | NaN |
| 25-Dec-2016  | 12:00:00, | NaN |
| 25-Dec-2016  | 18:00:00, | NaN |
| 26-Dec-2016, | NaN       |     |
| 26-Dec-2016  | 06:00:00, | NaN |
| 26-Dec-2016  | 12:00:00, | NaN |
| 26-Dec-2016  | 18:00:00, | NaN |
| 27-Dec-2016, | NaN       |     |
| 27-Dec-2016  | 06:00:00, | NaN |
| 27-Dec-2016  | 12:00:00, | NaN |
| 27-Dec-2016  | 18:00:00, | NaN |
| 28-Dec-2016, | NaN       |     |
| 28-Dec-2016  | 06:00:00, | NaN |
| 28-Dec-2016  | 12:00:00, | NaN |
| 28-Dec-2016  | 18:00:00, | NaN |
| 29-Dec-2016, | NaN       |     |
| 29-Dec-2016  | 06:00:00, | NaN |
| 29-Dec-2016  | 12:00:00, | NaN |
| 29-Dec-2016  | 18:00:00, | NaN |
| 30-Dec-2016, | NaN       |     |
| 30-Dec-2016  | 06:00:00, | NaN |
| 30-Dec-2016  | 12:00:00, | NaN |
| 30-Dec-2016  | 18:00:00, | NaN |
| 31-Dec-2016, | NaN       |     |
| 31-Dec-2016  | 06:00:00, | NaN |
| 31-Dec-2016  | 12:00:00, | NaN |
| 31-Dec-2016  | 18:00:00, | NaN |
| 01-Jan-2017, | NaN       |     |
| 01-Jan-2017  | 06:00:00, | NaN |
| 01-Jan-2017  | 12:00:00, | NaN |
| 01-Jan-2017  | 18:00:00, | NaN |
| 02-Jan-2017, | NaN       |     |
| 02-Jan-2017  | 06:00:00, | NaN |
| 02-Jan-2017  | 12:00:00, | NaN |
| 02-Jan-2017  | 18:00:00, | NaN |
| 03-Jan-2017, | NaN       |     |
| 03-Jan-2017  | 06:00:00, | NaN |
| 03-Jan-2017  | 12:00:00, | NaN |
| 03-Jan-2017  | 18:00:00, | NaN |
| 04-Jan-2017, | NaN       |     |
| 04-Jan-2017  | 06:00:00, | NaN |
| 04-Jan-2017  | 12:00:00, | NaN |
| 04-Jan-2017  | 18:00:00, | NaN |
| 05-Jan-2017, | NaN       |     |
| 05-Jan-2017  | 06:00:00, | NaN |
| 05-Jan-2017  | 12:00:00, | NaN |
| 05-Jan-2017  | 18:00:00, | NaN |
| 06-Jan-2017, | NaN       |     |

|              |           |     |
|--------------|-----------|-----|
| 06-Jan-2017  | 06:00:00, | NaN |
| 06-Jan-2017  | 12:00:00, | NaN |
| 06-Jan-2017  | 18:00:00, | NaN |
| 07-Jan-2017, |           | NaN |
| 07-Jan-2017  | 06:00:00, | NaN |
| 07-Jan-2017  | 12:00:00, | NaN |
| 07-Jan-2017  | 18:00:00, | NaN |
| 08-Jan-2017, |           | NaN |
| 08-Jan-2017  | 06:00:00, | NaN |
| 08-Jan-2017  | 12:00:00, | NaN |
| 08-Jan-2017  | 18:00:00, | NaN |
| 09-Jan-2017, |           | NaN |
| 09-Jan-2017  | 06:00:00, | NaN |
| 09-Jan-2017  | 12:00:00, | NaN |
| 09-Jan-2017  | 18:00:00, | NaN |
| 10-Jan-2017, |           | NaN |
| 10-Jan-2017  | 06:00:00, | NaN |
| 10-Jan-2017  | 12:00:00, | NaN |
| 10-Jan-2017  | 18:00:00, | NaN |
| 11-Jan-2017, |           | NaN |
| 11-Jan-2017  | 06:00:00, | NaN |
| 11-Jan-2017  | 12:00:00, | NaN |
| 11-Jan-2017  | 18:00:00, | NaN |
| 12-Jan-2017, |           | NaN |
| 12-Jan-2017  | 06:00:00, | NaN |
| 12-Jan-2017  | 12:00:00, | NaN |
| 12-Jan-2017  | 18:00:00, | NaN |
| 13-Jan-2017, |           | NaN |
| 13-Jan-2017  | 06:00:00, | NaN |
| 13-Jan-2017  | 12:00:00, | NaN |
| 13-Jan-2017  | 18:00:00, | NaN |
| 14-Jan-2017, |           | NaN |
| 14-Jan-2017  | 06:00:00, | NaN |
| 14-Jan-2017  | 12:00:00, | NaN |
| 14-Jan-2017  | 18:00:00, | NaN |
| 15-Jan-2017, |           | NaN |
| 15-Jan-2017  | 06:00:00, | NaN |
| 15-Jan-2017  | 12:00:00, | NaN |
| 15-Jan-2017  | 18:00:00, | NaN |
| 16-Jan-2017, |           | NaN |
| 16-Jan-2017  | 06:00:00, | NaN |
| 16-Jan-2017  | 12:00:00, | NaN |
| 16-Jan-2017  | 18:00:00, | NaN |
| 17-Jan-2017, |           | NaN |
| 17-Jan-2017  | 06:00:00, | NaN |
| 17-Jan-2017  | 12:00:00, | NaN |
| 17-Jan-2017  | 18:00:00, | NaN |
| 18-Jan-2017, |           | NaN |
| 18-Jan-2017  | 06:00:00, | NaN |
| 18-Jan-2017  | 12:00:00, | NaN |
| 18-Jan-2017  | 18:00:00, | NaN |
| 19-Jan-2017, |           | NaN |
| 19-Jan-2017  | 06:00:00, | NaN |
| 19-Jan-2017  | 12:00:00, | NaN |
| 19-Jan-2017  | 18:00:00, | NaN |
| 20-Jan-2017, |           | NaN |
| 20-Jan-2017  | 06:00:00, | NaN |
| 20-Jan-2017  | 12:00:00, | NaN |
| 20-Jan-2017  | 18:00:00, | NaN |
| 21-Jan-2017, |           | NaN |
| 21-Jan-2017  | 06:00:00, | NaN |
| 21-Jan-2017  | 12:00:00, | NaN |
| 21-Jan-2017  | 18:00:00, | NaN |
| 22-Jan-2017, |           | NaN |

22-Jan-2017 06:00:00, NaN  
22-Jan-2017 12:00:00, NaN  
22-Jan-2017 18:00:00, NaN  
23-Jan-2017, NaN  
23-Jan-2017 06:00:00, NaN  
23-Jan-2017 12:00:00, NaN  
23-Jan-2017 18:00:00, NaN  
24-Jan-2017, NaN  
24-Jan-2017 06:00:00, NaN  
24-Jan-2017 12:00:00, NaN  
24-Jan-2017 18:00:00, NaN  
25-Jan-2017, NaN  
25-Jan-2017 06:00:00, NaN  
25-Jan-2017 12:00:00, NaN  
25-Jan-2017 18:00:00, NaN  
26-Jan-2017, NaN  
26-Jan-2017 06:00:00, NaN  
26-Jan-2017 12:00:00, NaN  
26-Jan-2017 18:00:00, NaN  
27-Jan-2017, NaN  
27-Jan-2017 06:00:00, NaN  
27-Jan-2017 12:00:00, NaN  
27-Jan-2017 18:00:00, NaN  
28-Jan-2017, NaN  
28-Jan-2017 06:00:00, NaN  
28-Jan-2017 12:00:00, NaN  
28-Jan-2017 18:00:00, NaN  
29-Jan-2017, NaN  
29-Jan-2017 06:00:00, NaN  
29-Jan-2017 12:00:00, NaN  
29-Jan-2017 18:00:00, NaN  
30-Jan-2017, NaN  
30-Jan-2017 06:00:00, NaN  
30-Jan-2017 12:00:00, NaN  
30-Jan-2017 18:00:00, NaN  
31-Jan-2017, NaN  
31-Jan-2017 06:00:00, NaN  
31-Jan-2017 12:00:00, NaN  
31-Jan-2017 18:00:00, NaN  
01-Feb-2017, NaN  
01-Feb-2017 06:00:00, NaN  
01-Feb-2017 12:00:00, NaN  
01-Feb-2017 18:00:00, NaN  
02-Feb-2017, NaN  
02-Feb-2017 06:00:00, NaN  
02-Feb-2017 12:00:00, NaN  
02-Feb-2017 18:00:00, NaN  
03-Feb-2017, NaN  
03-Feb-2017 06:00:00, NaN  
03-Feb-2017 12:00:00, NaN  
03-Feb-2017 18:00:00, NaN  
04-Feb-2017, NaN  
04-Feb-2017 06:00:00, NaN  
04-Feb-2017 12:00:00, NaN  
04-Feb-2017 18:00:00, NaN  
05-Feb-2017, NaN  
05-Feb-2017 06:00:00, NaN  
05-Feb-2017 12:00:00, NaN  
05-Feb-2017 18:00:00, NaN  
06-Feb-2017, NaN  
06-Feb-2017 06:00:00, NaN  
06-Feb-2017 12:00:00, NaN  
06-Feb-2017 18:00:00, NaN  
07-Feb-2017, NaN

07-Feb-2017 06:00:00, NaN  
07-Feb-2017 12:00:00, NaN  
07-Feb-2017 18:00:00, NaN  
08-Feb-2017, NaN  
08-Feb-2017 06:00:00, NaN  
08-Feb-2017 12:00:00, NaN  
08-Feb-2017 18:00:00, NaN  
09-Feb-2017, NaN  
09-Feb-2017 06:00:00, NaN  
09-Feb-2017 12:00:00, NaN  
09-Feb-2017 18:00:00, NaN  
10-Feb-2017, NaN  
10-Feb-2017 06:00:00, NaN  
10-Feb-2017 12:00:00, NaN  
10-Feb-2017 18:00:00, NaN  
11-Feb-2017, NaN  
11-Feb-2017 06:00:00, NaN  
11-Feb-2017 12:00:00, NaN  
11-Feb-2017 18:00:00, NaN  
12-Feb-2017, NaN  
12-Feb-2017 06:00:00, NaN  
12-Feb-2017 12:00:00, NaN  
12-Feb-2017 18:00:00, NaN  
13-Feb-2017, NaN  
13-Feb-2017 06:00:00, NaN  
13-Feb-2017 12:00:00, NaN  
13-Feb-2017 18:00:00, NaN  
14-Feb-2017, NaN  
14-Feb-2017 06:00:00, NaN  
14-Feb-2017 12:00:00, NaN  
14-Feb-2017 18:00:00, NaN  
15-Feb-2017, NaN  
15-Feb-2017 06:00:00, NaN  
15-Feb-2017 12:00:00, NaN  
15-Feb-2017 18:00:00, NaN  
16-Feb-2017, NaN  
16-Feb-2017 06:00:00, NaN  
16-Feb-2017 12:00:00, NaN  
16-Feb-2017 18:00:00, NaN  
17-Feb-2017, NaN  
17-Feb-2017 06:00:00, NaN  
17-Feb-2017 12:00:00, NaN  
17-Feb-2017 18:00:00, NaN  
18-Feb-2017, NaN  
18-Feb-2017 06:00:00, NaN  
18-Feb-2017 12:00:00, NaN  
18-Feb-2017 18:00:00, NaN  
19-Feb-2017, NaN  
19-Feb-2017 06:00:00, NaN  
19-Feb-2017 12:00:00, NaN  
19-Feb-2017 18:00:00, NaN  
20-Feb-2017, NaN  
20-Feb-2017 06:00:00, NaN  
20-Feb-2017 12:00:00, NaN  
20-Feb-2017 18:00:00, NaN  
21-Feb-2017, NaN  
21-Feb-2017 06:00:00, NaN  
21-Feb-2017 12:00:00, NaN  
21-Feb-2017 18:00:00, NaN  
22-Feb-2017, NaN  
22-Feb-2017 06:00:00, NaN  
22-Feb-2017 12:00:00, NaN  
22-Feb-2017 18:00:00, NaN  
23-Feb-2017, NaN

23-Feb-2017 06:00:00, NaN  
23-Feb-2017 12:00:00, NaN  
23-Feb-2017 18:00:00, NaN  
24-Feb-2017, NaN  
24-Feb-2017 06:00:00, NaN  
24-Feb-2017 12:00:00, NaN  
24-Feb-2017 18:00:00, NaN  
25-Feb-2017, NaN  
25-Feb-2017 06:00:00, NaN  
25-Feb-2017 12:00:00, NaN  
25-Feb-2017 18:00:00, NaN  
26-Feb-2017, NaN  
26-Feb-2017 06:00:00, NaN  
26-Feb-2017 12:00:00, NaN  
26-Feb-2017 18:00:00, NaN  
27-Feb-2017, NaN  
27-Feb-2017 06:00:00, NaN  
27-Feb-2017 12:00:00, NaN  
27-Feb-2017 18:00:00, NaN  
28-Feb-2017, NaN  
28-Feb-2017 06:00:00, NaN  
28-Feb-2017 12:00:00, NaN  
28-Feb-2017 18:00:00, NaN  
01-Mar-2017, NaN  
01-Mar-2017 06:00:00, NaN  
01-Mar-2017 12:00:00, NaN  
01-Mar-2017 18:00:00, NaN  
02-Mar-2017, NaN  
02-Mar-2017 06:00:00, NaN  
02-Mar-2017 12:00:00, NaN  
02-Mar-2017 18:00:00, NaN  
03-Mar-2017, NaN  
03-Mar-2017 06:00:00, NaN  
03-Mar-2017 12:00:00, NaN  
03-Mar-2017 18:00:00, NaN  
04-Mar-2017, NaN  
04-Mar-2017 06:00:00, NaN  
04-Mar-2017 12:00:00, NaN  
04-Mar-2017 18:00:00, NaN  
05-Mar-2017, NaN  
05-Mar-2017 06:00:00, NaN  
05-Mar-2017 12:00:00, NaN  
05-Mar-2017 18:00:00, NaN  
06-Mar-2017, NaN  
06-Mar-2017 06:00:00, NaN  
06-Mar-2017 12:00:00, NaN  
06-Mar-2017 18:00:00, NaN  
07-Mar-2017, NaN  
07-Mar-2017 06:00:00, NaN  
07-Mar-2017 12:00:00, NaN  
07-Mar-2017 18:00:00, NaN  
08-Mar-2017, NaN  
08-Mar-2017 06:00:00, NaN  
08-Mar-2017 12:00:00, NaN  
08-Mar-2017 18:00:00, NaN  
09-Mar-2017, NaN  
09-Mar-2017 06:00:00, NaN  
09-Mar-2017 12:00:00, NaN  
09-Mar-2017 18:00:00, NaN  
10-Mar-2017, NaN  
10-Mar-2017 06:00:00, NaN  
10-Mar-2017 12:00:00, NaN  
10-Mar-2017 18:00:00, NaN  
11-Mar-2017, NaN



11-Mar-2017 06:00:00, NaN  
11-Mar-2017 12:00:00, NaN  
11-Mar-2017 18:00:00, NaN  
12-Mar-2017, NaN  
12-Mar-2017 06:00:00, NaN  
12-Mar-2017 12:00:00, NaN  
12-Mar-2017 18:00:00, NaN  
13-Mar-2017, NaN  
13-Mar-2017 06:00:00, NaN  
13-Mar-2017 12:00:00, NaN  
13-Mar-2017 18:00:00, NaN  
14-Mar-2017, NaN  
14-Mar-2017 06:00:00, NaN  
14-Mar-2017 12:00:00, NaN  
14-Mar-2017 18:00:00, NaN  
15-Mar-2017, NaN  
15-Mar-2017 06:00:00, NaN  
15-Mar-2017 12:00:00, NaN  
15-Mar-2017 18:00:00, NaN  
16-Mar-2017, NaN  
16-Mar-2017 06:00:00, NaN  
16-Mar-2017 12:00:00, NaN  
16-Mar-2017 18:00:00, NaN  
17-Mar-2017, NaN  
17-Mar-2017 06:00:00, NaN  
17-Mar-2017 12:00:00, NaN  
17-Mar-2017 18:00:00, NaN  
18-Mar-2017, NaN  
18-Mar-2017 06:00:00, NaN  
18-Mar-2017 12:00:00, NaN  
18-Mar-2017 18:00:00, NaN  
19-Mar-2017, NaN  
19-Mar-2017 06:00:00, NaN  
19-Mar-2017 12:00:00, NaN  
19-Mar-2017 18:00:00, NaN  
20-Mar-2017, NaN  
20-Mar-2017 06:00:00, NaN  
20-Mar-2017 12:00:00, NaN  
20-Mar-2017 18:00:00, NaN  
21-Mar-2017, NaN  
21-Mar-2017 06:00:00, NaN  
21-Mar-2017 12:00:00, NaN  
21-Mar-2017 18:00:00, NaN  
22-Mar-2017, NaN  
22-Mar-2017 06:00:00, NaN  
22-Mar-2017 12:00:00, NaN  
22-Mar-2017 18:00:00, NaN  
23-Mar-2017, NaN  
23-Mar-2017 06:00:00, NaN  
23-Mar-2017 12:00:00, NaN  
23-Mar-2017 18:00:00, NaN  
24-Mar-2017, NaN  
24-Mar-2017 06:00:00, NaN  
24-Mar-2017 12:00:00, NaN  
24-Mar-2017 18:00:00, NaN  
25-Mar-2017, NaN  
25-Mar-2017 06:00:00, NaN  
25-Mar-2017 12:00:00, NaN  
25-Mar-2017 18:00:00, NaN  
26-Mar-2017, NaN  
26-Mar-2017 06:00:00, NaN  
26-Mar-2017 12:00:00, NaN  
26-Mar-2017 18:00:00, NaN  
27-Mar-2017, NaN

27-Mar-2017 06:00:00, NaN  
27-Mar-2017 12:00:00, NaN  
27-Mar-2017 18:00:00, NaN  
28-Mar-2017, NaN  
28-Mar-2017 06:00:00, NaN  
28-Mar-2017 12:00:00, NaN  
28-Mar-2017 18:00:00, NaN  
29-Mar-2017, NaN  
29-Mar-2017 06:00:00, NaN  
29-Mar-2017 12:00:00, NaN  
29-Mar-2017 18:00:00, NaN  
30-Mar-2017, NaN  
30-Mar-2017 06:00:00, NaN  
30-Mar-2017 12:00:00, NaN  
30-Mar-2017 18:00:00, NaN  
31-Mar-2017, NaN  
31-Mar-2017 06:00:00, NaN  
31-Mar-2017 12:00:00, NaN  
31-Mar-2017 18:00:00, NaN  
01-Apr-2017, NaN  
01-Apr-2017 06:00:00, NaN  
01-Apr-2017 12:00:00, NaN  
01-Apr-2017 18:00:00, NaN  
02-Apr-2017, NaN  
02-Apr-2017 06:00:00, NaN  
02-Apr-2017 12:00:00, NaN  
02-Apr-2017 18:00:00, NaN  
03-Apr-2017, NaN  
03-Apr-2017 06:00:00, NaN  
03-Apr-2017 12:00:00, NaN  
03-Apr-2017 18:00:00, NaN  
04-Apr-2017, NaN  
04-Apr-2017 06:00:00, NaN  
04-Apr-2017 12:00:00, NaN  
04-Apr-2017 18:00:00, NaN  
05-Apr-2017, NaN  
05-Apr-2017 06:00:00, NaN  
05-Apr-2017 12:00:00, NaN  
05-Apr-2017 18:00:00, NaN  
06-Apr-2017, NaN  
06-Apr-2017 06:00:00, NaN  
06-Apr-2017 12:00:00, NaN  
06-Apr-2017 18:00:00, NaN  
07-Apr-2017, NaN  
07-Apr-2017 06:00:00, NaN  
07-Apr-2017 12:00:00, NaN  
07-Apr-2017 18:00:00, NaN  
08-Apr-2017, NaN  
08-Apr-2017 06:00:00, NaN  
08-Apr-2017 12:00:00, NaN  
08-Apr-2017 18:00:00, NaN  
09-Apr-2017, NaN  
09-Apr-2017 06:00:00, NaN  
09-Apr-2017 12:00:00, NaN  
09-Apr-2017 18:00:00, NaN  
10-Apr-2017, NaN  
10-Apr-2017 06:00:00, NaN  
10-Apr-2017 12:00:00, NaN  
10-Apr-2017 18:00:00, NaN  
11-Apr-2017, NaN  
11-Apr-2017 06:00:00, NaN  
11-Apr-2017 12:00:00, NaN  
11-Apr-2017 18:00:00, NaN  
12-Apr-2017, NaN

12-Apr-2017 06:00:00, NaN  
12-Apr-2017 12:00:00, NaN  
12-Apr-2017 18:00:00, NaN  
13-Apr-2017, NaN  
13-Apr-2017 06:00:00, NaN  
13-Apr-2017 12:00:00, NaN  
13-Apr-2017 18:00:00, NaN  
14-Apr-2017, NaN  
14-Apr-2017 06:00:00, NaN  
14-Apr-2017 12:00:00, NaN  
14-Apr-2017 18:00:00, NaN  
15-Apr-2017, NaN  
15-Apr-2017 06:00:00, NaN  
15-Apr-2017 12:00:00, NaN  
15-Apr-2017 18:00:00, NaN  
16-Apr-2017, NaN  
16-Apr-2017 06:00:00, NaN  
16-Apr-2017 12:00:00, NaN  
16-Apr-2017 18:00:00, NaN  
17-Apr-2017, NaN  
17-Apr-2017 06:00:00, NaN  
17-Apr-2017 12:00:00, NaN  
17-Apr-2017 18:00:00, NaN  
18-Apr-2017, NaN  
18-Apr-2017 06:00:00, NaN  
18-Apr-2017 12:00:00, NaN  
18-Apr-2017 18:00:00, NaN  
19-Apr-2017, NaN  
19-Apr-2017 06:00:00, NaN  
19-Apr-2017 12:00:00, NaN  
19-Apr-2017 18:00:00, NaN  
20-Apr-2017, NaN  
20-Apr-2017 06:00:00, NaN  
20-Apr-2017 12:00:00, NaN  
20-Apr-2017 18:00:00, NaN  
21-Apr-2017, NaN  
21-Apr-2017 06:00:00, NaN  
21-Apr-2017 12:00:00, NaN  
21-Apr-2017 18:00:00, NaN  
22-Apr-2017, NaN  
22-Apr-2017 06:00:00, NaN  
22-Apr-2017 12:00:00, NaN  
22-Apr-2017 18:00:00, NaN  
23-Apr-2017, NaN  
23-Apr-2017 06:00:00, NaN  
23-Apr-2017 12:00:00, NaN  
23-Apr-2017 18:00:00, NaN  
24-Apr-2017, NaN  
24-Apr-2017 06:00:00, NaN  
24-Apr-2017 12:00:00, NaN  
24-Apr-2017 18:00:00, NaN  
25-Apr-2017, NaN  
25-Apr-2017 06:00:00, NaN  
25-Apr-2017 12:00:00, NaN  
25-Apr-2017 18:00:00, NaN  
26-Apr-2017, NaN  
26-Apr-2017 06:00:00, NaN  
26-Apr-2017 12:00:00, NaN  
26-Apr-2017 18:00:00, NaN  
27-Apr-2017, NaN  
27-Apr-2017 06:00:00, NaN  
27-Apr-2017 12:00:00, NaN  
27-Apr-2017 18:00:00, NaN  
28-Apr-2017, NaN

28-Apr-2017 06:00:00, NaN  
28-Apr-2017 12:00:00, NaN  
28-Apr-2017 18:00:00, NaN  
29-Apr-2017, NaN  
29-Apr-2017 06:00:00, NaN  
29-Apr-2017 12:00:00, NaN  
29-Apr-2017 18:00:00, NaN  
30-Apr-2017, NaN  
30-Apr-2017 06:00:00, NaN  
30-Apr-2017 12:00:00, NaN  
30-Apr-2017 18:00:00, NaN  
01-May-2017, NaN  
01-May-2017 06:00:00, NaN  
01-May-2017 12:00:00, NaN  
01-May-2017 18:00:00, NaN  
02-May-2017, NaN  
02-May-2017 06:00:00, NaN  
02-May-2017 12:00:00, NaN  
02-May-2017 18:00:00, NaN  
03-May-2017, NaN  
03-May-2017 06:00:00, NaN  
03-May-2017 12:00:00, NaN  
03-May-2017 18:00:00, NaN  
04-May-2017, NaN  
04-May-2017 06:00:00, NaN  
04-May-2017 12:00:00, NaN  
04-May-2017 18:00:00, NaN  
05-May-2017, NaN  
05-May-2017 06:00:00, NaN  
05-May-2017 12:00:00, NaN  
05-May-2017 18:00:00, NaN  
06-May-2017, NaN  
06-May-2017 06:00:00, NaN  
06-May-2017 12:00:00, NaN  
06-May-2017 18:00:00, NaN  
07-May-2017, NaN  
07-May-2017 06:00:00, NaN  
07-May-2017 12:00:00, NaN  
07-May-2017 18:00:00, NaN  
08-May-2017, NaN  
08-May-2017 06:00:00, NaN  
08-May-2017 12:00:00, NaN  
08-May-2017 18:00:00, NaN  
09-May-2017, NaN  
09-May-2017 06:00:00, NaN  
09-May-2017 12:00:00, NaN  
09-May-2017 18:00:00, NaN  
10-May-2017, NaN  
10-May-2017 06:00:00, NaN  
10-May-2017 12:00:00, NaN  
10-May-2017 18:00:00, NaN  
11-May-2017, NaN  
11-May-2017 06:00:00, NaN  
11-May-2017 12:00:00, NaN  
11-May-2017 18:00:00, NaN  
12-May-2017, NaN  
12-May-2017 06:00:00, NaN  
12-May-2017 12:00:00, NaN  
12-May-2017 18:00:00, NaN  
13-May-2017, NaN  
13-May-2017 06:00:00, NaN  
13-May-2017 12:00:00, NaN  
13-May-2017 18:00:00, NaN  
14-May-2017, NaN

14-May-2017 06:00:00, NaN  
14-May-2017 12:00:00, NaN  
14-May-2017 18:00:00, NaN  
15-May-2017, NaN  
15-May-2017 06:00:00, NaN  
15-May-2017 12:00:00, NaN  
15-May-2017 18:00:00, NaN  
16-May-2017, NaN  
16-May-2017 06:00:00, NaN  
16-May-2017 12:00:00, NaN  
16-May-2017 18:00:00, NaN  
17-May-2017, NaN  
17-May-2017 06:00:00, NaN  
17-May-2017 12:00:00, NaN  
17-May-2017 18:00:00, NaN  
18-May-2017, NaN  
18-May-2017 06:00:00, NaN  
18-May-2017 12:00:00, NaN  
18-May-2017 18:00:00, NaN  
19-May-2017, NaN  
19-May-2017 06:00:00, NaN  
19-May-2017 12:00:00, NaN  
19-May-2017 18:00:00, NaN  
20-May-2017, NaN  
20-May-2017 06:00:00, NaN  
20-May-2017 12:00:00, NaN  
20-May-2017 18:00:00, NaN  
21-May-2017, NaN  
21-May-2017 06:00:00, NaN  
21-May-2017 12:00:00, NaN  
21-May-2017 18:00:00, NaN  
22-May-2017, NaN  
22-May-2017 06:00:00, NaN  
22-May-2017 12:00:00, NaN  
22-May-2017 18:00:00, NaN  
23-May-2017, NaN  
23-May-2017 06:00:00, NaN  
23-May-2017 12:00:00, NaN  
23-May-2017 18:00:00, NaN  
24-May-2017, NaN  
24-May-2017 06:00:00, NaN  
24-May-2017 12:00:00, NaN  
24-May-2017 18:00:00, NaN  
25-May-2017, NaN  
25-May-2017 06:00:00, NaN  
25-May-2017 12:00:00, NaN  
25-May-2017 18:00:00, NaN  
26-May-2017, NaN  
26-May-2017 06:00:00, NaN  
26-May-2017 12:00:00, NaN  
26-May-2017 18:00:00, NaN  
27-May-2017, NaN  
27-May-2017 06:00:00, NaN  
27-May-2017 12:00:00, NaN  
27-May-2017 18:00:00, NaN  
28-May-2017, NaN  
28-May-2017 06:00:00, NaN  
28-May-2017 12:00:00, NaN  
28-May-2017 18:00:00, NaN  
29-May-2017, NaN  
29-May-2017 06:00:00, NaN  
29-May-2017 12:00:00, NaN  
29-May-2017 18:00:00, NaN  
30-May-2017, NaN

30-May-2017 06:00:00, NaN  
30-May-2017 12:00:00, NaN  
30-May-2017 18:00:00, NaN  
31-May-2017, NaN  
31-May-2017 06:00:00, NaN  
31-May-2017 12:00:00, NaN  
31-May-2017 18:00:00, NaN  
01-Jun-2017, 3.05e-01  
01-Jun-2017 06:00:00, 3.05e-01  
01-Jun-2017 12:00:00, 3.05e-01  
01-Jun-2017 18:00:00, 3.05e-01  
02-Jun-2017, 3.05e-01  
02-Jun-2017 06:00:00, 3.05e-01  
02-Jun-2017 12:00:00, 3.05e-01  
02-Jun-2017 18:00:00, 3.05e-01  
03-Jun-2017, 3.04e-01  
03-Jun-2017 06:00:00, 3.04e-01  
03-Jun-2017 12:00:00, NaN  
03-Jun-2017 18:00:00, NaN  
04-Jun-2017, NaN  
04-Jun-2017 06:00:00, NaN  
04-Jun-2017 07:00:00, 3.04e-01  
04-Jun-2017 07:15:00, 3.04e-01  
04-Jun-2017 07:30:00, 3.04e-01  
04-Jun-2017 07:45:00, 3.04e-01  
04-Jun-2017 08:00:00, 3.04e-01  
04-Jun-2017 08:15:00, 3.04e-01  
04-Jun-2017 08:30:00, 3.04e-01  
04-Jun-2017 08:45:00, 3.04e-01  
04-Jun-2017 09:00:00, 3.04e-01  
04-Jun-2017 09:15:00, 3.04e-01  
04-Jun-2017 09:30:00, 3.04e-01  
04-Jun-2017 09:45:00, 3.04e-01  
04-Jun-2017 10:00:00, 3.04e-01  
04-Jun-2017 10:15:00, 3.04e-01  
04-Jun-2017 10:30:00, 3.04e-01  
04-Jun-2017 10:45:00, 3.04e-01  
04-Jun-2017 11:00:00, 3.04e-01  
04-Jun-2017 11:15:00, 3.04e-01  
04-Jun-2017 11:30:00, 3.04e-01  
04-Jun-2017 11:45:00, 3.04e-01  
04-Jun-2017 12:00:00, 3.04e-01  
04-Jun-2017 12:15:00, 3.04e-01  
04-Jun-2017 12:30:00, 3.04e-01  
04-Jun-2017 12:45:00, 3.04e-01  
04-Jun-2017 13:00:00, 3.04e-01  
04-Jun-2017 13:15:00, 3.04e-01  
04-Jun-2017 13:30:00, 3.04e-01  
04-Jun-2017 13:45:00, 3.04e-01  
04-Jun-2017 14:00:00, 3.04e-01  
04-Jun-2017 14:15:00, 3.04e-01  
04-Jun-2017 14:30:00, 3.04e-01  
04-Jun-2017 14:45:00, 3.04e-01  
04-Jun-2017 15:00:00, 3.04e-01  
04-Jun-2017 15:15:00, 3.04e-01  
04-Jun-2017 15:30:00, 3.04e-01  
04-Jun-2017 15:45:00, 3.04e-01  
04-Jun-2017 16:00:00, 3.04e-01  
04-Jun-2017 16:15:00, 3.04e-01  
04-Jun-2017 16:30:00, 3.04e-01  
04-Jun-2017 16:45:00, 3.04e-01  
04-Jun-2017 17:00:00, 3.04e-01  
04-Jun-2017 17:15:00, 3.04e-01  
04-Jun-2017 17:30:00, 3.04e-01

04-Jun-2017 17:45:00, 3.04e-01  
04-Jun-2017 18:00:00, 3.04e-01  
04-Jun-2017 18:15:00, 3.04e-01  
04-Jun-2017 18:30:00, 3.04e-01  
04-Jun-2017 18:45:00, 3.04e-01  
04-Jun-2017 19:00:00, 3.04e-01  
04-Jun-2017 19:15:00, 3.04e-01  
04-Jun-2017 19:30:00, 3.04e-01  
04-Jun-2017 19:45:00, 3.04e-01  
04-Jun-2017 20:00:00, 3.04e-01  
04-Jun-2017 20:15:00, 3.04e-01  
04-Jun-2017 20:30:00, 3.04e-01  
04-Jun-2017 20:45:00, 3.04e-01  
04-Jun-2017 21:00:00, 3.04e-01  
04-Jun-2017 21:15:00, 3.04e-01  
04-Jun-2017 21:30:00, 3.04e-01  
04-Jun-2017 21:45:00, 3.04e-01  
04-Jun-2017 22:00:00, 3.04e-01  
04-Jun-2017 22:15:00, 3.04e-01  
04-Jun-2017 22:30:00, 3.03e-01  
04-Jun-2017 22:45:00, 3.04e-01  
04-Jun-2017 23:00:00, 3.03e-01  
04-Jun-2017 23:15:00, 3.04e-01  
04-Jun-2017 23:30:00, 3.03e-01  
04-Jun-2017 23:45:00, 3.04e-01  
05-Jun-2017, 3.03e-01  
05-Jun-2017 00:15:00, 3.04e-01  
05-Jun-2017 00:30:00, 3.03e-01  
05-Jun-2017 00:45:00, 3.03e-01  
05-Jun-2017 01:00:00, 3.03e-01  
05-Jun-2017 01:15:00, 3.03e-01  
05-Jun-2017 01:30:00, 3.03e-01  
05-Jun-2017 01:45:00, 3.03e-01  
05-Jun-2017 02:00:00, 3.03e-01  
05-Jun-2017 02:15:00, 3.04e-01  
05-Jun-2017 02:30:00, 3.03e-01  
05-Jun-2017 02:45:00, 3.03e-01  
05-Jun-2017 03:00:00, 3.03e-01  
05-Jun-2017 03:15:00, 3.03e-01  
05-Jun-2017 03:30:00, 3.03e-01  
05-Jun-2017 03:45:00, 3.03e-01  
05-Jun-2017 04:00:00, 3.03e-01  
05-Jun-2017 04:15:00, 3.03e-01  
05-Jun-2017 04:30:00, 3.03e-01  
05-Jun-2017 04:45:00, 3.03e-01  
05-Jun-2017 05:00:00, 3.03e-01  
05-Jun-2017 05:15:00, 3.03e-01  
05-Jun-2017 05:30:00, 3.03e-01  
05-Jun-2017 05:45:00, 3.03e-01  
05-Jun-2017 06:00:00, 3.03e-01  
05-Jun-2017 06:15:00, 3.03e-01  
05-Jun-2017 06:30:00, 3.03e-01  
05-Jun-2017 06:45:00, 3.03e-01  
05-Jun-2017 07:00:00, 3.03e-01  
05-Jun-2017 07:15:00, 3.03e-01  
05-Jun-2017 07:30:00, 3.03e-01  
05-Jun-2017 07:45:00, 3.03e-01  
05-Jun-2017 08:00:00, 3.03e-01  
05-Jun-2017 08:15:00, 3.03e-01  
05-Jun-2017 08:30:00, 3.03e-01  
05-Jun-2017 08:45:00, 3.03e-01  
05-Jun-2017 09:00:00, 3.03e-01  
05-Jun-2017 09:15:00, 3.03e-01  
05-Jun-2017 09:30:00, 3.03e-01

05-Jun-2017 09:45:00, 3.03e-01  
05-Jun-2017 10:00:00, 3.03e-01  
05-Jun-2017 10:15:00, 3.03e-01  
05-Jun-2017 10:30:00, 3.03e-01  
05-Jun-2017 10:45:00, 3.03e-01  
05-Jun-2017 11:00:00, 3.03e-01  
05-Jun-2017 11:15:00, 3.03e-01  
05-Jun-2017 11:30:00, 3.03e-01  
05-Jun-2017 11:45:00, 3.03e-01  
05-Jun-2017 12:00:00, 3.03e-01  
05-Jun-2017 12:15:00, 3.03e-01  
05-Jun-2017 12:30:00, 3.03e-01  
05-Jun-2017 12:45:00, 3.03e-01  
05-Jun-2017 13:00:00, 3.03e-01  
05-Jun-2017 13:15:00, 3.03e-01  
05-Jun-2017 13:30:00, 3.03e-01  
05-Jun-2017 13:45:00, 3.03e-01  
05-Jun-2017 14:00:00, 3.03e-01  
05-Jun-2017 14:15:00, 3.03e-01  
05-Jun-2017 14:30:00, 3.03e-01  
05-Jun-2017 14:45:00, 3.03e-01  
05-Jun-2017 15:00:00, 3.03e-01  
05-Jun-2017 15:15:00, 3.03e-01  
05-Jun-2017 15:30:00, 3.03e-01  
05-Jun-2017 15:45:00, 3.03e-01  
05-Jun-2017 16:00:00, 3.03e-01  
05-Jun-2017 16:15:00, 3.03e-01  
05-Jun-2017 16:30:00, 3.03e-01  
05-Jun-2017 16:45:00, 3.03e-01  
05-Jun-2017 17:00:00, 3.03e-01  
05-Jun-2017 17:15:00, 3.03e-01  
05-Jun-2017 17:30:00, 3.03e-01  
05-Jun-2017 17:45:00, 3.03e-01  
05-Jun-2017 18:00:00, 3.03e-01  
05-Jun-2017 18:15:00, 3.03e-01  
05-Jun-2017 18:30:00, 3.03e-01  
05-Jun-2017 18:45:00, 3.03e-01  
05-Jun-2017 19:00:00, 3.03e-01  
05-Jun-2017 19:15:00, 3.03e-01  
05-Jun-2017 19:30:00, 3.03e-01  
05-Jun-2017 19:45:00, 3.03e-01  
05-Jun-2017 20:00:00, 3.03e-01  
05-Jun-2017 20:15:00, 3.03e-01  
05-Jun-2017 20:30:00, 3.03e-01  
05-Jun-2017 20:45:00, 3.03e-01  
05-Jun-2017 21:00:00, 3.03e-01  
05-Jun-2017 21:15:00, 3.03e-01  
05-Jun-2017 21:30:00, 3.03e-01  
05-Jun-2017 21:45:00, 3.03e-01  
05-Jun-2017 22:00:00, 3.03e-01  
05-Jun-2017 22:15:00, 3.03e-01  
05-Jun-2017 22:30:00, 3.03e-01  
05-Jun-2017 22:45:00, 3.03e-01  
05-Jun-2017 23:00:00, 3.03e-01  
05-Jun-2017 23:15:00, 3.03e-01  
05-Jun-2017 23:30:00, 3.03e-01  
05-Jun-2017 23:45:00, 3.03e-01  
06-Jun-2017, 3.03e-01  
06-Jun-2017 00:15:00, 3.03e-01  
06-Jun-2017 00:30:00, 3.03e-01  
06-Jun-2017 00:45:00, 3.03e-01  
06-Jun-2017 01:00:00, 3.03e-01  
06-Jun-2017 01:15:00, 3.03e-01  
06-Jun-2017 01:30:00, 3.03e-01



|             |           |          |
|-------------|-----------|----------|
| 06-Jun-2017 | 01:45:00, | 3.03e-01 |
| 06-Jun-2017 | 02:00:00, | 3.03e-01 |
| 06-Jun-2017 | 02:15:00, | 3.03e-01 |
| 06-Jun-2017 | 02:30:00, | 3.03e-01 |
| 06-Jun-2017 | 02:45:00, | 3.03e-01 |
| 06-Jun-2017 | 03:00:00, | 3.03e-01 |
| 06-Jun-2017 | 03:15:00, | 3.03e-01 |
| 06-Jun-2017 | 03:30:00, | 3.03e-01 |
| 06-Jun-2017 | 03:45:00, | 3.03e-01 |
| 06-Jun-2017 | 04:00:00, | 3.03e-01 |
| 06-Jun-2017 | 04:15:00, | 3.03e-01 |
| 06-Jun-2017 | 04:30:00, | 3.03e-01 |
| 06-Jun-2017 | 04:45:00, | 3.03e-01 |
| 06-Jun-2017 | 05:00:00, | 3.03e-01 |
| 06-Jun-2017 | 05:15:00, | 3.03e-01 |
| 06-Jun-2017 | 05:30:00, | 3.03e-01 |
| 06-Jun-2017 | 05:45:00, | 3.03e-01 |
| 06-Jun-2017 | 06:00:00, | 3.03e-01 |
| 06-Jun-2017 | 06:15:00, | 3.03e-01 |
| 06-Jun-2017 | 06:30:00, | 3.03e-01 |
| 06-Jun-2017 | 06:45:00, | 3.03e-01 |
| 06-Jun-2017 | 07:00:00, | 3.03e-01 |
| 06-Jun-2017 | 07:15:00, | 3.03e-01 |
| 06-Jun-2017 | 07:30:00, | 3.03e-01 |
| 06-Jun-2017 | 07:45:00, | 3.03e-01 |
| 06-Jun-2017 | 08:00:00, | 3.03e-01 |
| 06-Jun-2017 | 08:15:00, | 3.03e-01 |
| 06-Jun-2017 | 08:30:00, | 3.03e-01 |
| 06-Jun-2017 | 08:45:00, | 3.03e-01 |
| 06-Jun-2017 | 09:00:00, | 3.03e-01 |
| 06-Jun-2017 | 09:15:00, | 3.03e-01 |
| 06-Jun-2017 | 09:30:00, | 3.03e-01 |
| 06-Jun-2017 | 09:45:00, | 3.03e-01 |
| 06-Jun-2017 | 10:00:00, | 3.03e-01 |
| 06-Jun-2017 | 10:15:00, | 3.03e-01 |
| 06-Jun-2017 | 10:30:00, | 3.03e-01 |
| 06-Jun-2017 | 10:45:00, | 3.03e-01 |
| 06-Jun-2017 | 11:00:00, | 3.03e-01 |
| 06-Jun-2017 | 11:15:00, | 3.03e-01 |
| 06-Jun-2017 | 11:30:00, | 3.03e-01 |
| 06-Jun-2017 | 11:45:00, | 3.03e-01 |
| 06-Jun-2017 | 12:00:00, | 3.03e-01 |
| 06-Jun-2017 | 12:15:00, | 3.03e-01 |
| 06-Jun-2017 | 12:30:00, | 3.03e-01 |
| 06-Jun-2017 | 12:45:00, | 3.03e-01 |
| 06-Jun-2017 | 13:00:00, | 3.03e-01 |
| 06-Jun-2017 | 13:15:00, | 3.03e-01 |
| 06-Jun-2017 | 13:30:00, | 3.03e-01 |
| 06-Jun-2017 | 13:45:00, | 3.03e-01 |
| 06-Jun-2017 | 14:00:00, | 3.03e-01 |
| 06-Jun-2017 | 14:15:00, | 3.03e-01 |
| 06-Jun-2017 | 14:30:00, | 3.03e-01 |
| 06-Jun-2017 | 14:45:00, | 3.03e-01 |
| 06-Jun-2017 | 15:00:00, | 3.03e-01 |
| 06-Jun-2017 | 15:15:00, | 3.03e-01 |
| 06-Jun-2017 | 15:30:00, | 3.03e-01 |
| 06-Jun-2017 | 15:45:00, | 3.03e-01 |
| 06-Jun-2017 | 16:00:00, | 3.03e-01 |
| 06-Jun-2017 | 16:15:00, | 3.03e-01 |
| 06-Jun-2017 | 16:30:00, | 3.03e-01 |
| 06-Jun-2017 | 16:45:00, | 3.03e-01 |
| 06-Jun-2017 | 17:00:00, | 3.03e-01 |
| 06-Jun-2017 | 17:15:00, | 3.03e-01 |
| 06-Jun-2017 | 17:30:00, | 3.03e-01 |

06-Jun-2017 17:45:00, 3.03e-01  
06-Jun-2017 18:00:00, 3.03e-01  
06-Jun-2017 18:15:00, 3.03e-01  
06-Jun-2017 18:30:00, 3.03e-01  
06-Jun-2017 18:45:00, 3.03e-01  
06-Jun-2017 19:00:00, 3.03e-01  
06-Jun-2017 19:15:00, 3.03e-01  
06-Jun-2017 19:30:00, 3.03e-01  
06-Jun-2017 19:45:00, 3.03e-01  
06-Jun-2017 20:00:00, 3.03e-01  
06-Jun-2017 20:15:00, 3.03e-01  
06-Jun-2017 20:30:00, 3.03e-01  
06-Jun-2017 20:45:00, 3.03e-01  
06-Jun-2017 21:00:00, 3.03e-01  
06-Jun-2017 21:15:00, 3.03e-01  
06-Jun-2017 21:30:00, 3.03e-01  
06-Jun-2017 21:45:00, 3.03e-01  
06-Jun-2017 22:00:00, 3.03e-01  
06-Jun-2017 22:15:00, 3.03e-01  
06-Jun-2017 22:30:00, 3.03e-01  
06-Jun-2017 22:45:00, 3.03e-01  
06-Jun-2017 23:00:00, 3.03e-01  
06-Jun-2017 23:15:00, 3.03e-01  
06-Jun-2017 23:30:00, 3.03e-01  
06-Jun-2017 23:45:00, 3.03e-01  
07-Jun-2017, 3.03e-01  
07-Jun-2017 00:15:00, 3.03e-01  
07-Jun-2017 00:30:00, 3.03e-01  
07-Jun-2017 00:45:00, 3.03e-01  
07-Jun-2017 01:00:00, 3.03e-01  
07-Jun-2017 01:15:00, 3.03e-01  
07-Jun-2017 01:30:00, 3.03e-01  
07-Jun-2017 01:45:00, 3.03e-01  
07-Jun-2017 02:00:00, 3.03e-01  
07-Jun-2017 02:15:00, 3.03e-01  
07-Jun-2017 02:30:00, 3.03e-01  
07-Jun-2017 02:45:00, 3.03e-01  
07-Jun-2017 03:00:00, 3.03e-01  
07-Jun-2017 03:15:00, 3.03e-01  
07-Jun-2017 03:30:00, 3.03e-01  
07-Jun-2017 03:45:00, 3.03e-01  
07-Jun-2017 04:00:00, 3.03e-01  
07-Jun-2017 04:15:00, 3.03e-01  
07-Jun-2017 04:30:00, 3.03e-01  
07-Jun-2017 04:45:00, 3.03e-01  
07-Jun-2017 05:00:00, 3.03e-01  
07-Jun-2017 05:15:00, 3.03e-01  
07-Jun-2017 05:30:00, 3.03e-01  
07-Jun-2017 05:45:00, 3.03e-01  
07-Jun-2017 06:00:00, 3.03e-01  
07-Jun-2017 06:15:00, 3.03e-01  
07-Jun-2017 06:30:00, 3.03e-01  
07-Jun-2017 06:45:00, 3.03e-01  
07-Jun-2017 07:00:00, 3.03e-01  
07-Jun-2017 07:15:00, 3.03e-01  
07-Jun-2017 07:30:00, 3.03e-01  
07-Jun-2017 07:45:00, 3.03e-01  
07-Jun-2017 08:00:00, 3.03e-01  
07-Jun-2017 08:15:00, 3.03e-01  
07-Jun-2017 08:30:00, 3.03e-01  
07-Jun-2017 08:45:00, 3.03e-01  
07-Jun-2017 09:00:00, 3.02e-01  
07-Jun-2017 09:15:00, 3.02e-01  
07-Jun-2017 09:30:00, 3.02e-01

07-Jun-2017 09:45:00, 3.02e-01  
07-Jun-2017 10:00:00, 3.02e-01  
07-Jun-2017 10:15:00, 3.02e-01  
07-Jun-2017 10:30:00, 3.02e-01  
07-Jun-2017 10:45:00, 3.02e-01  
07-Jun-2017 11:00:00, 3.02e-01  
07-Jun-2017 11:15:00, 3.02e-01  
07-Jun-2017 11:30:00, 3.02e-01  
07-Jun-2017 11:45:00, 3.02e-01  
07-Jun-2017 12:00:00, 3.02e-01  
07-Jun-2017 12:15:00, 3.02e-01  
07-Jun-2017 12:30:00, 3.02e-01  
07-Jun-2017 12:45:00, 3.02e-01  
07-Jun-2017 13:00:00, 3.02e-01  
07-Jun-2017 13:15:00, 3.02e-01  
07-Jun-2017 13:30:00, 3.02e-01  
07-Jun-2017 13:45:00, 3.02e-01  
07-Jun-2017 14:00:00, 3.02e-01  
07-Jun-2017 14:15:00, 3.02e-01  
07-Jun-2017 14:30:00, 3.02e-01  
07-Jun-2017 14:45:00, 3.02e-01  
07-Jun-2017 15:00:00, 3.02e-01  
07-Jun-2017 15:15:00, 3.02e-01  
07-Jun-2017 15:30:00, 3.02e-01  
07-Jun-2017 15:45:00, 3.02e-01  
07-Jun-2017 16:00:00, 3.02e-01  
07-Jun-2017 16:15:00, 3.02e-01  
07-Jun-2017 16:30:00, 3.02e-01  
07-Jun-2017 16:45:00, 3.02e-01  
07-Jun-2017 17:00:00, 3.02e-01  
07-Jun-2017 17:15:00, 3.02e-01  
07-Jun-2017 17:30:00, 3.02e-01  
07-Jun-2017 17:45:00, 3.02e-01  
07-Jun-2017 18:00:00, 3.02e-01  
07-Jun-2017 18:15:00, 3.02e-01  
07-Jun-2017 18:30:00, 3.02e-01  
07-Jun-2017 18:45:00, 3.02e-01  
07-Jun-2017 19:00:00, 3.02e-01  
07-Jun-2017 19:15:00, 3.02e-01  
07-Jun-2017 19:30:00, 3.02e-01  
07-Jun-2017 19:45:00, 3.02e-01  
07-Jun-2017 20:00:00, 3.02e-01  
07-Jun-2017 20:15:00, 3.02e-01  
07-Jun-2017 20:30:00, 3.02e-01  
07-Jun-2017 20:45:00, 3.02e-01  
07-Jun-2017 21:00:00, 3.02e-01  
07-Jun-2017 21:15:00, 3.02e-01  
07-Jun-2017 21:30:00, 3.02e-01  
07-Jun-2017 21:45:00, 3.02e-01  
07-Jun-2017 22:00:00, 3.02e-01  
07-Jun-2017 22:15:00, 3.02e-01  
07-Jun-2017 22:30:00, 3.02e-01  
07-Jun-2017 22:45:00, 3.02e-01  
07-Jun-2017 23:00:00, 3.02e-01  
07-Jun-2017 23:15:00, 3.02e-01  
07-Jun-2017 23:30:00, 3.02e-01  
07-Jun-2017 23:45:00, 3.02e-01  
08-Jun-2017, 3.02e-01  
08-Jun-2017 00:15:00, 3.02e-01  
08-Jun-2017 00:30:00, 3.02e-01  
08-Jun-2017 00:45:00, 3.02e-01  
08-Jun-2017 01:00:00, 3.02e-01  
08-Jun-2017 01:15:00, 3.02e-01  
08-Jun-2017 01:30:00, 3.02e-01

08-Jun-2017 01:45:00, 3.02e-01  
08-Jun-2017 02:00:00, 3.02e-01  
08-Jun-2017 02:15:00, 3.02e-01  
08-Jun-2017 02:30:00, 3.02e-01  
08-Jun-2017 02:45:00, 3.02e-01  
08-Jun-2017 03:00:00, 3.02e-01  
08-Jun-2017 03:15:00, 3.02e-01  
08-Jun-2017 03:30:00, 3.02e-01  
08-Jun-2017 03:45:00, 3.02e-01  
08-Jun-2017 04:00:00, 3.02e-01  
08-Jun-2017 04:15:00, 3.02e-01  
08-Jun-2017 04:30:00, 3.02e-01  
08-Jun-2017 04:45:00, 3.02e-01  
08-Jun-2017 05:00:00, 3.02e-01  
08-Jun-2017 05:15:00, 3.02e-01  
08-Jun-2017 05:30:00, 3.02e-01  
08-Jun-2017 05:45:00, 3.02e-01  
08-Jun-2017 06:00:00, 3.02e-01  
08-Jun-2017 06:15:00, 3.02e-01  
08-Jun-2017 06:30:00, 3.02e-01  
08-Jun-2017 06:45:00, 3.02e-01  
08-Jun-2017 07:00:00, 3.02e-01  
08-Jun-2017 07:15:00, 3.02e-01  
08-Jun-2017 07:30:00, 3.02e-01  
08-Jun-2017 07:45:00, 3.02e-01  
08-Jun-2017 08:00:00, 3.02e-01  
08-Jun-2017 08:15:00, 3.02e-01  
08-Jun-2017 08:30:00, 3.02e-01  
08-Jun-2017 08:45:00, 3.02e-01  
08-Jun-2017 09:00:00, 3.02e-01  
08-Jun-2017 09:15:00, 3.02e-01  
08-Jun-2017 09:30:00, 3.02e-01  
08-Jun-2017 09:45:00, 3.02e-01  
08-Jun-2017 10:00:00, 3.02e-01  
08-Jun-2017 10:15:00, 3.02e-01  
08-Jun-2017 10:30:00, 3.02e-01  
08-Jun-2017 10:45:00, 3.02e-01  
08-Jun-2017 11:00:00, 3.02e-01  
08-Jun-2017 11:15:00, 3.02e-01  
08-Jun-2017 11:30:00, 3.02e-01  
08-Jun-2017 11:45:00, 3.02e-01  
08-Jun-2017 12:00:00, 3.02e-01  
08-Jun-2017 12:15:00, 3.02e-01  
08-Jun-2017 12:30:00, 3.02e-01  
08-Jun-2017 12:45:00, 3.02e-01  
08-Jun-2017 13:00:00, 3.02e-01  
08-Jun-2017 13:15:00, 3.02e-01  
08-Jun-2017 13:30:00, 3.02e-01  
08-Jun-2017 13:45:00, 3.02e-01  
08-Jun-2017 14:00:00, 3.02e-01  
08-Jun-2017 14:15:00, 3.02e-01  
08-Jun-2017 14:30:00, 3.02e-01  
08-Jun-2017 14:45:00, 3.02e-01  
08-Jun-2017 15:00:00, 3.02e-01  
08-Jun-2017 15:15:00, 3.02e-01  
08-Jun-2017 15:30:00, 3.02e-01  
08-Jun-2017 15:45:00, 3.02e-01  
08-Jun-2017 16:00:00, 3.02e-01  
08-Jun-2017 16:15:00, 3.02e-01  
08-Jun-2017 16:30:00, 3.02e-01  
08-Jun-2017 16:45:00, 3.02e-01  
08-Jun-2017 17:00:00, 3.02e-01  
08-Jun-2017 17:15:00, 3.02e-01  
08-Jun-2017 17:30:00, 3.02e-01

08-Jun-2017 17:45:00, 3.02e-01  
08-Jun-2017 18:00:00, 3.02e-01  
08-Jun-2017 18:15:00, 3.02e-01  
08-Jun-2017 18:30:00, 3.02e-01  
08-Jun-2017 18:45:00, 3.02e-01  
08-Jun-2017 19:00:00, 3.02e-01  
08-Jun-2017 19:15:00, 3.02e-01  
08-Jun-2017 19:30:00, 3.02e-01  
08-Jun-2017 19:45:00, 3.02e-01  
08-Jun-2017 20:00:00, 3.02e-01  
08-Jun-2017 20:15:00, 3.02e-01  
08-Jun-2017 20:30:00, 3.02e-01  
08-Jun-2017 20:45:00, 3.02e-01  
08-Jun-2017 21:00:00, 3.02e-01  
08-Jun-2017 21:15:00, 3.02e-01  
08-Jun-2017 21:30:00, 3.02e-01  
08-Jun-2017 21:45:00, 3.02e-01  
08-Jun-2017 22:00:00, 3.02e-01  
08-Jun-2017 22:15:00, 3.02e-01  
08-Jun-2017 22:30:00, 3.02e-01  
08-Jun-2017 22:45:00, 3.02e-01  
08-Jun-2017 23:00:00, 3.02e-01  
08-Jun-2017 23:15:00, 3.02e-01  
08-Jun-2017 23:30:00, 3.02e-01  
08-Jun-2017 23:45:00, 3.02e-01  
09-Jun-2017, 3.02e-01  
09-Jun-2017 00:15:00, 3.02e-01  
09-Jun-2017 00:30:00, 3.02e-01  
09-Jun-2017 00:45:00, 3.02e-01  
09-Jun-2017 01:00:00, 3.02e-01  
09-Jun-2017 01:15:00, 3.02e-01  
09-Jun-2017 01:30:00, 3.02e-01  
09-Jun-2017 01:45:00, 3.02e-01  
09-Jun-2017 02:00:00, 3.02e-01  
09-Jun-2017 02:15:00, 3.02e-01  
09-Jun-2017 02:30:00, 3.02e-01  
09-Jun-2017 02:45:00, 3.02e-01  
09-Jun-2017 03:00:00, 3.02e-01  
09-Jun-2017 03:15:00, 3.02e-01  
09-Jun-2017 03:30:00, 3.02e-01  
09-Jun-2017 03:45:00, 3.02e-01  
09-Jun-2017 04:00:00, 3.02e-01  
09-Jun-2017 04:15:00, 3.02e-01  
09-Jun-2017 04:30:00, 3.02e-01  
09-Jun-2017 04:45:00, 3.02e-01  
09-Jun-2017 05:00:00, 3.02e-01  
09-Jun-2017 05:15:00, 3.02e-01  
09-Jun-2017 05:30:00, 3.02e-01  
09-Jun-2017 05:45:00, 3.02e-01  
09-Jun-2017 06:00:00, 3.02e-01  
09-Jun-2017 06:15:00, 3.02e-01  
09-Jun-2017 06:30:00, 3.02e-01  
09-Jun-2017 06:45:00, 3.02e-01  
09-Jun-2017 07:00:00, 3.02e-01  
09-Jun-2017 07:15:00, 3.02e-01  
09-Jun-2017 07:30:00, 3.02e-01  
09-Jun-2017 07:45:00, 3.02e-01  
09-Jun-2017 08:00:00, 3.02e-01  
09-Jun-2017 08:15:00, 3.02e-01  
09-Jun-2017 08:30:00, 3.02e-01  
09-Jun-2017 08:45:00, 3.02e-01  
09-Jun-2017 09:00:00, 3.02e-01  
09-Jun-2017 09:15:00, 3.02e-01  
09-Jun-2017 09:30:00, 3.02e-01

09-Jun-2017 09:45:00, 3.01e-01  
09-Jun-2017 10:00:00, 3.02e-01  
09-Jun-2017 10:15:00, 3.02e-01  
09-Jun-2017 10:30:00, 3.01e-01  
09-Jun-2017 10:45:00, 3.01e-01  
09-Jun-2017 11:00:00, 3.01e-01  
09-Jun-2017 11:15:00, 3.01e-01  
09-Jun-2017 11:30:00, 3.01e-01  
09-Jun-2017 11:45:00, 3.01e-01  
09-Jun-2017 12:00:00, 3.01e-01  
09-Jun-2017 12:15:00, 3.01e-01  
09-Jun-2017 12:30:00, 3.01e-01  
09-Jun-2017 12:45:00, 3.01e-01  
09-Jun-2017 13:00:00, 3.01e-01  
09-Jun-2017 13:15:00, 3.01e-01  
09-Jun-2017 13:30:00, 3.01e-01  
09-Jun-2017 13:45:00, 3.01e-01  
09-Jun-2017 14:00:00, 3.01e-01  
09-Jun-2017 14:15:00, 3.01e-01  
09-Jun-2017 14:30:00, 3.01e-01  
09-Jun-2017 14:45:00, 3.01e-01  
09-Jun-2017 15:00:00, 3.01e-01  
09-Jun-2017 15:15:00, 3.01e-01  
09-Jun-2017 15:30:00, 3.01e-01  
09-Jun-2017 15:45:00, 3.01e-01  
09-Jun-2017 16:00:00, 3.01e-01  
09-Jun-2017 16:15:00, 3.01e-01  
09-Jun-2017 16:30:00, 3.01e-01  
09-Jun-2017 16:45:00, 3.01e-01  
09-Jun-2017 17:00:00, 3.01e-01  
09-Jun-2017 17:15:00, 3.01e-01  
09-Jun-2017 17:30:00, 3.01e-01  
09-Jun-2017 17:45:00, 3.01e-01  
09-Jun-2017 18:00:00, 3.01e-01  
09-Jun-2017 18:15:00, 3.01e-01  
09-Jun-2017 18:30:00, 3.01e-01  
09-Jun-2017 18:45:00, 3.01e-01  
09-Jun-2017 19:00:00, 3.01e-01  
09-Jun-2017 19:15:00, 3.01e-01  
09-Jun-2017 19:30:00, 3.01e-01  
09-Jun-2017 19:45:00, 3.01e-01  
09-Jun-2017 20:00:00, 3.01e-01  
09-Jun-2017 20:15:00, 3.01e-01  
09-Jun-2017 20:30:00, 3.01e-01  
09-Jun-2017 20:45:00, 3.01e-01  
09-Jun-2017 21:00:00, 3.01e-01  
09-Jun-2017 21:15:00, 3.01e-01  
09-Jun-2017 21:30:00, 3.01e-01  
09-Jun-2017 21:45:00, 3.01e-01  
09-Jun-2017 22:00:00, 3.01e-01  
09-Jun-2017 22:15:00, 3.01e-01  
09-Jun-2017 22:30:00, 3.01e-01  
09-Jun-2017 22:45:00, 3.01e-01  
09-Jun-2017 23:00:00, 3.01e-01  
09-Jun-2017 23:15:00, 3.01e-01  
09-Jun-2017 23:30:00, 3.01e-01  
09-Jun-2017 23:45:00, 3.01e-01  
10-Jun-2017, 3.01e-01  
10-Jun-2017 00:15:00, 3.01e-01  
10-Jun-2017 00:30:00, 3.01e-01  
10-Jun-2017 00:45:00, 3.01e-01  
10-Jun-2017 01:00:00, 3.01e-01  
10-Jun-2017 01:15:00, 3.01e-01  
10-Jun-2017 01:30:00, 3.01e-01

10-Jun-2017 01:45:00, 3.01e-01  
10-Jun-2017 02:00:00, 3.01e-01  
10-Jun-2017 02:15:00, 3.01e-01  
10-Jun-2017 02:30:00, 3.01e-01  
10-Jun-2017 02:45:00, 3.01e-01  
10-Jun-2017 03:00:00, 3.01e-01  
10-Jun-2017 03:15:00, 3.01e-01  
10-Jun-2017 03:30:00, 3.01e-01  
10-Jun-2017 03:45:00, 3.01e-01  
10-Jun-2017 04:00:00, 3.01e-01  
10-Jun-2017 04:15:00, 3.01e-01  
10-Jun-2017 04:30:00, 3.01e-01  
10-Jun-2017 04:45:00, 3.01e-01  
10-Jun-2017 05:00:00, 3.01e-01  
10-Jun-2017 05:15:00, 3.01e-01  
10-Jun-2017 05:30:00, 3.01e-01  
10-Jun-2017 05:45:00, 3.01e-01  
10-Jun-2017 06:00:00, 3.01e-01  
10-Jun-2017 06:15:00, 3.01e-01  
10-Jun-2017 06:30:00, 3.01e-01  
10-Jun-2017 06:45:00, 3.01e-01  
10-Jun-2017 07:00:00, 3.01e-01  
10-Jun-2017 07:15:00, 3.01e-01  
10-Jun-2017 07:30:00, 3.01e-01  
10-Jun-2017 07:45:00, 3.01e-01  
10-Jun-2017 08:00:00, 3.01e-01  
10-Jun-2017 08:15:00, 3.01e-01  
10-Jun-2017 08:30:00, 3.01e-01  
10-Jun-2017 08:45:00, 3.01e-01  
10-Jun-2017 09:00:00, 3.01e-01  
10-Jun-2017 09:15:00, 3.01e-01  
10-Jun-2017 09:30:00, 3.01e-01  
10-Jun-2017 09:45:00, 3.01e-01  
10-Jun-2017 10:00:00, 3.01e-01  
10-Jun-2017 10:15:00, 3.01e-01  
10-Jun-2017 10:30:00, 3.01e-01  
10-Jun-2017 10:45:00, 3.01e-01  
10-Jun-2017 11:00:00, 3.01e-01  
10-Jun-2017 11:15:00, 3.01e-01  
10-Jun-2017 11:30:00, 3.01e-01  
10-Jun-2017 11:45:00, 3.01e-01  
10-Jun-2017 12:00:00, 3.01e-01  
10-Jun-2017 12:15:00, 3.01e-01  
10-Jun-2017 12:30:00, 3.01e-01  
10-Jun-2017 12:45:00, 3.01e-01  
10-Jun-2017 13:00:00, 3.01e-01  
10-Jun-2017 13:15:00, 3.01e-01  
10-Jun-2017 13:30:00, 3.01e-01  
10-Jun-2017 13:45:00, 3.01e-01  
10-Jun-2017 14:00:00, 3.01e-01  
10-Jun-2017 14:15:00, 3.01e-01  
10-Jun-2017 14:30:00, 3.01e-01  
10-Jun-2017 14:45:00, 3.01e-01  
10-Jun-2017 15:00:00, 3.01e-01  
10-Jun-2017 15:15:00, 3.01e-01  
10-Jun-2017 15:30:00, 3.01e-01  
10-Jun-2017 15:45:00, 3.01e-01  
10-Jun-2017 16:00:00, 3.01e-01  
10-Jun-2017 16:15:00, 3.01e-01  
10-Jun-2017 16:30:00, 3.01e-01  
10-Jun-2017 16:45:00, 3.01e-01  
10-Jun-2017 17:00:00, 3.01e-01  
10-Jun-2017 17:15:00, 3.01e-01  
10-Jun-2017 17:30:00, 3.01e-01

10-Jun-2017 17:45:00, 3.01e-01  
10-Jun-2017 18:00:00, 3.01e-01  
10-Jun-2017 18:15:00, 3.01e-01  
10-Jun-2017 18:30:00, 3.01e-01  
10-Jun-2017 18:45:00, 3.01e-01  
10-Jun-2017 19:00:00, 3.01e-01  
10-Jun-2017 19:15:00, 3.01e-01  
10-Jun-2017 19:30:00, 3.01e-01  
10-Jun-2017 19:45:00, 3.01e-01  
10-Jun-2017 20:00:00, 3.01e-01  
10-Jun-2017 20:15:00, 3.01e-01  
10-Jun-2017 20:30:00, 3.01e-01  
10-Jun-2017 20:45:00, 3.01e-01  
10-Jun-2017 21:00:00, 3.01e-01  
10-Jun-2017 21:15:00, 3.01e-01  
10-Jun-2017 21:30:00, 3.01e-01  
10-Jun-2017 21:45:00, 3.01e-01  
10-Jun-2017 22:00:00, 3.01e-01  
10-Jun-2017 22:15:00, 3.01e-01  
10-Jun-2017 22:30:00, 3.01e-01  
10-Jun-2017 22:45:00, 3.01e-01  
10-Jun-2017 23:00:00, 3.01e-01  
10-Jun-2017 23:15:00, 3.01e-01  
10-Jun-2017 23:30:00, 3.01e-01  
10-Jun-2017 23:45:00, 3.01e-01  
11-Jun-2017, 3.01e-01  
11-Jun-2017 00:15:00, 3.01e-01  
11-Jun-2017 00:30:00, 3.01e-01  
11-Jun-2017 00:45:00, 3.01e-01  
11-Jun-2017 01:00:00, 3.01e-01  
11-Jun-2017 01:15:00, 3.01e-01  
11-Jun-2017 01:30:00, 3.01e-01  
11-Jun-2017 01:45:00, 3.01e-01  
11-Jun-2017 02:00:00, 3.01e-01  
11-Jun-2017 02:15:00, 3.01e-01  
11-Jun-2017 02:30:00, 3.01e-01  
11-Jun-2017 02:45:00, 3.01e-01  
11-Jun-2017 03:00:00, 3.01e-01  
11-Jun-2017 03:15:00, 3.01e-01  
11-Jun-2017 03:30:00, 3.01e-01  
11-Jun-2017 03:45:00, 3.01e-01  
11-Jun-2017 04:00:00, 3.01e-01  
11-Jun-2017 04:15:00, 3.01e-01  
11-Jun-2017 04:30:00, 3.01e-01  
11-Jun-2017 04:45:00, 3.01e-01  
11-Jun-2017 05:00:00, 3.01e-01  
11-Jun-2017 05:15:00, 3.01e-01  
11-Jun-2017 05:30:00, 3.01e-01  
11-Jun-2017 05:45:00, 3.01e-01  
11-Jun-2017 06:00:00, 3.01e-01  
11-Jun-2017 06:15:00, 3.00e-01  
11-Jun-2017 06:30:00, 3.00e-01  
11-Jun-2017 06:45:00, 3.00e-01  
11-Jun-2017 07:00:00, 3.00e-01  
11-Jun-2017 07:15:00, 3.00e-01  
11-Jun-2017 07:30:00, 3.00e-01  
11-Jun-2017 07:45:00, 3.00e-01  
11-Jun-2017 08:00:00, 3.00e-01  
11-Jun-2017 08:15:00, 3.00e-01  
11-Jun-2017 08:30:00, 3.00e-01  
11-Jun-2017 08:45:00, 3.00e-01  
11-Jun-2017 09:00:00, 3.00e-01  
11-Jun-2017 09:15:00, 3.00e-01  
11-Jun-2017 09:30:00, 3.00e-01



11-Jun-2017 09:45:00, 3.00e-01  
11-Jun-2017 10:00:00, 3.00e-01  
11-Jun-2017 10:15:00, 3.00e-01  
11-Jun-2017 10:30:00, 3.00e-01  
11-Jun-2017 10:45:00, 3.00e-01  
11-Jun-2017 11:00:00, 3.00e-01  
11-Jun-2017 11:15:00, 3.00e-01  
11-Jun-2017 11:30:00, 3.00e-01  
11-Jun-2017 11:45:00, 3.00e-01  
11-Jun-2017 12:00:00, 3.00e-01  
11-Jun-2017 12:15:00, 3.00e-01  
11-Jun-2017 12:30:00, 3.00e-01  
11-Jun-2017 12:45:00, 3.00e-01  
11-Jun-2017 13:00:00, 3.00e-01  
11-Jun-2017 13:15:00, 3.00e-01  
11-Jun-2017 13:30:00, 3.00e-01  
11-Jun-2017 13:45:00, 3.00e-01  
11-Jun-2017 14:00:00, 3.00e-01  
11-Jun-2017 14:15:00, 3.00e-01  
11-Jun-2017 14:30:00, 3.00e-01  
11-Jun-2017 14:45:00, 3.00e-01  
11-Jun-2017 15:00:00, 3.00e-01  
11-Jun-2017 15:15:00, 3.00e-01  
11-Jun-2017 15:30:00, 3.00e-01  
11-Jun-2017 15:45:00, 3.00e-01  
11-Jun-2017 16:00:00, 3.00e-01  
11-Jun-2017 16:15:00, 3.00e-01  
11-Jun-2017 16:30:00, 3.00e-01  
11-Jun-2017 16:45:00, 3.00e-01  
11-Jun-2017 17:00:00, 3.00e-01  
11-Jun-2017 17:15:00, 3.00e-01  
11-Jun-2017 17:30:00, 3.00e-01  
11-Jun-2017 17:45:00, 3.00e-01  
11-Jun-2017 18:00:00, 3.00e-01  
11-Jun-2017 18:15:00, 3.00e-01  
11-Jun-2017 18:30:00, 3.00e-01  
11-Jun-2017 18:45:00, 3.00e-01  
11-Jun-2017 19:00:00, 3.00e-01  
11-Jun-2017 19:15:00, 3.00e-01  
11-Jun-2017 19:30:00, 3.00e-01  
11-Jun-2017 19:45:00, 3.00e-01  
11-Jun-2017 20:00:00, 3.00e-01  
11-Jun-2017 20:15:00, 3.00e-01  
11-Jun-2017 20:30:00, 3.00e-01  
11-Jun-2017 20:45:00, 3.00e-01  
11-Jun-2017 21:00:00, 3.00e-01  
11-Jun-2017 21:15:00, 3.00e-01  
11-Jun-2017 21:30:00, 3.00e-01  
11-Jun-2017 21:45:00, 3.00e-01  
11-Jun-2017 22:00:00, 3.00e-01  
11-Jun-2017 22:15:00, 3.00e-01  
11-Jun-2017 22:30:00, 3.00e-01  
11-Jun-2017 22:45:00, 3.00e-01  
11-Jun-2017 23:00:00, 3.00e-01  
11-Jun-2017 23:15:00, 3.00e-01  
11-Jun-2017 23:30:00, 3.00e-01  
11-Jun-2017 23:45:00, 3.00e-01  
12-Jun-2017, 3.00e-01  
12-Jun-2017 00:15:00, 3.00e-01  
12-Jun-2017 00:30:00, 3.00e-01  
12-Jun-2017 00:45:00, 3.00e-01  
12-Jun-2017 01:00:00, 3.00e-01  
12-Jun-2017 01:15:00, 3.00e-01  
12-Jun-2017 01:30:00, 3.00e-01

12-Jun-2017 01:45:00, 3.00e-01  
12-Jun-2017 02:00:00, 3.00e-01  
12-Jun-2017 02:15:00, 3.00e-01  
12-Jun-2017 02:30:00, 3.00e-01  
12-Jun-2017 02:45:00, 3.00e-01  
12-Jun-2017 03:00:00, 3.00e-01  
12-Jun-2017 03:15:00, 3.00e-01  
12-Jun-2017 03:30:00, 3.00e-01  
12-Jun-2017 03:45:00, 3.00e-01  
12-Jun-2017 04:00:00, 3.00e-01  
12-Jun-2017 04:15:00, 3.00e-01  
12-Jun-2017 04:30:00, 3.00e-01  
12-Jun-2017 04:45:00, 3.00e-01  
12-Jun-2017 05:00:00, 3.00e-01  
12-Jun-2017 05:15:00, 3.00e-01  
12-Jun-2017 05:30:00, 3.00e-01  
12-Jun-2017 05:45:00, 3.00e-01  
12-Jun-2017 06:00:00, 3.00e-01  
12-Jun-2017 06:15:00, 3.00e-01  
12-Jun-2017 06:30:00, 3.00e-01  
12-Jun-2017 06:45:00, 3.00e-01  
12-Jun-2017 07:00:00, 3.00e-01  
12-Jun-2017 07:15:00, 3.00e-01  
12-Jun-2017 07:30:00, 3.00e-01  
12-Jun-2017 07:45:00, 3.00e-01  
12-Jun-2017 08:00:00, 3.00e-01  
12-Jun-2017 08:15:00, 3.00e-01  
12-Jun-2017 08:30:00, 3.00e-01  
12-Jun-2017 08:45:00, 3.00e-01  
12-Jun-2017 09:00:00, 3.00e-01  
12-Jun-2017 09:15:00, 3.00e-01  
12-Jun-2017 09:30:00, 3.00e-01  
12-Jun-2017 09:45:00, 3.00e-01  
12-Jun-2017 10:00:00, 3.00e-01  
12-Jun-2017 10:15:00, 3.00e-01  
12-Jun-2017 10:30:00, 3.00e-01  
12-Jun-2017 10:45:00, 3.00e-01  
12-Jun-2017 11:00:00, 3.00e-01  
12-Jun-2017 11:15:00, 3.00e-01  
12-Jun-2017 11:30:00, 3.00e-01  
12-Jun-2017 11:45:00, 3.00e-01  
12-Jun-2017 12:00:00, 3.00e-01  
12-Jun-2017 12:15:00, 3.00e-01  
12-Jun-2017 12:30:00, 3.00e-01  
12-Jun-2017 12:45:00, 3.00e-01  
12-Jun-2017 13:00:00, 3.00e-01  
12-Jun-2017 13:15:00, 3.00e-01  
12-Jun-2017 13:30:00, 3.00e-01  
12-Jun-2017 13:45:00, 3.00e-01  
12-Jun-2017 14:00:00, 3.00e-01  
12-Jun-2017 14:15:00, 3.00e-01  
12-Jun-2017 14:30:00, 3.00e-01  
12-Jun-2017 14:45:00, 3.00e-01  
12-Jun-2017 15:00:00, 3.00e-01  
12-Jun-2017 15:15:00, 3.00e-01  
12-Jun-2017 15:30:00, 3.00e-01  
12-Jun-2017 15:45:00, 3.00e-01  
12-Jun-2017 16:00:00, 3.00e-01  
12-Jun-2017 16:15:00, 3.00e-01  
12-Jun-2017 16:30:00, 3.00e-01  
12-Jun-2017 16:45:00, 3.00e-01  
12-Jun-2017 17:00:00, 3.00e-01  
12-Jun-2017 17:15:00, 3.00e-01  
12-Jun-2017 17:30:00, 3.00e-01

12-Jun-2017 17:45:00, 3.00e-01  
12-Jun-2017 18:00:00, 3.00e-01  
12-Jun-2017 18:15:00, 3.00e-01  
12-Jun-2017 18:30:00, 3.00e-01  
12-Jun-2017 18:45:00, 3.00e-01  
12-Jun-2017 19:00:00, 3.00e-01  
12-Jun-2017 19:15:00, 3.00e-01  
12-Jun-2017 19:30:00, 3.00e-01  
12-Jun-2017 19:45:00, 3.00e-01  
12-Jun-2017 20:00:00, 3.00e-01  
12-Jun-2017 20:15:00, 3.00e-01  
12-Jun-2017 20:30:00, 3.00e-01  
12-Jun-2017 20:45:00, 3.00e-01  
12-Jun-2017 21:00:00, 3.00e-01  
12-Jun-2017 21:15:00, 3.00e-01  
12-Jun-2017 21:30:00, 3.00e-01  
12-Jun-2017 21:45:00, 3.00e-01  
12-Jun-2017 22:00:00, 3.00e-01  
12-Jun-2017 22:15:00, 3.00e-01  
12-Jun-2017 22:30:00, 3.00e-01  
12-Jun-2017 22:45:00, 3.00e-01  
12-Jun-2017 23:00:00, 3.00e-01  
12-Jun-2017 23:15:00, 3.00e-01  
12-Jun-2017 23:30:00, 2.99e-01  
12-Jun-2017 23:45:00, 2.99e-01  
13-Jun-2017, 2.99e-01  
13-Jun-2017 00:15:00, 2.99e-01  
13-Jun-2017 00:30:00, 2.99e-01  
13-Jun-2017 00:45:00, 2.99e-01  
13-Jun-2017 01:00:00, 2.99e-01  
13-Jun-2017 01:15:00, 2.99e-01  
13-Jun-2017 01:30:00, 2.99e-01  
13-Jun-2017 01:45:00, 2.99e-01  
13-Jun-2017 02:00:00, 2.99e-01  
13-Jun-2017 02:15:00, 2.99e-01  
13-Jun-2017 02:30:00, 2.99e-01  
13-Jun-2017 02:45:00, 2.99e-01  
13-Jun-2017 03:00:00, 2.99e-01  
13-Jun-2017 03:15:00, 2.99e-01  
13-Jun-2017 03:30:00, 2.99e-01  
13-Jun-2017 03:45:00, 2.99e-01  
13-Jun-2017 04:00:00, 2.99e-01  
13-Jun-2017 04:15:00, 2.99e-01  
13-Jun-2017 04:30:00, 2.99e-01  
13-Jun-2017 04:45:00, 2.99e-01  
13-Jun-2017 05:00:00, 2.99e-01  
13-Jun-2017 05:15:00, 2.99e-01  
13-Jun-2017 05:30:00, 2.99e-01  
13-Jun-2017 05:45:00, 2.99e-01  
13-Jun-2017 06:00:00, 2.99e-01  
13-Jun-2017 06:15:00, 2.99e-01  
13-Jun-2017 06:30:00, 2.99e-01  
13-Jun-2017 06:45:00, 2.99e-01  
13-Jun-2017 07:00:00, 2.99e-01  
13-Jun-2017 07:15:00, 2.99e-01  
13-Jun-2017 07:30:00, 2.99e-01  
13-Jun-2017 07:45:00, 2.99e-01  
13-Jun-2017 08:00:00, 2.99e-01  
13-Jun-2017 08:15:00, 2.99e-01  
13-Jun-2017 08:30:00, 2.99e-01  
13-Jun-2017 08:45:00, 2.99e-01  
13-Jun-2017 09:00:00, 2.99e-01  
13-Jun-2017 09:15:00, 2.99e-01  
13-Jun-2017 09:30:00, 2.99e-01

13-Jun-2017 09:45:00, 2.99e-01  
13-Jun-2017 10:00:00, 2.99e-01  
13-Jun-2017 10:15:00, 2.99e-01  
13-Jun-2017 10:30:00, 2.99e-01  
13-Jun-2017 10:45:00, 2.99e-01  
13-Jun-2017 11:00:00, 2.99e-01  
13-Jun-2017 11:15:00, 2.99e-01  
13-Jun-2017 11:30:00, 2.99e-01  
13-Jun-2017 11:45:00, 2.99e-01  
13-Jun-2017 12:00:00, 2.99e-01  
13-Jun-2017 12:15:00, 2.99e-01  
13-Jun-2017 12:30:00, 2.99e-01  
13-Jun-2017 12:45:00, 2.99e-01  
13-Jun-2017 13:00:00, 2.99e-01  
13-Jun-2017 13:15:00, 2.99e-01  
13-Jun-2017 13:30:00, 2.99e-01  
13-Jun-2017 13:45:00, 2.99e-01  
13-Jun-2017 14:00:00, 2.99e-01  
13-Jun-2017 14:15:00, 2.99e-01  
13-Jun-2017 14:30:00, 2.99e-01  
13-Jun-2017 14:45:00, 2.99e-01  
13-Jun-2017 15:00:00, 2.99e-01  
13-Jun-2017 15:15:00, 2.99e-01  
13-Jun-2017 15:30:00, 2.99e-01  
13-Jun-2017 15:45:00, 2.99e-01  
13-Jun-2017 16:00:00, 2.99e-01  
13-Jun-2017 16:15:00, 2.99e-01  
13-Jun-2017 16:30:00, 2.99e-01  
13-Jun-2017 16:45:00, 2.99e-01  
13-Jun-2017 17:00:00, 2.99e-01  
13-Jun-2017 17:15:00, 2.99e-01  
13-Jun-2017 17:30:00, 2.99e-01  
13-Jun-2017 17:45:00, 2.99e-01  
13-Jun-2017 18:00:00, 2.99e-01  
13-Jun-2017 18:15:00, 2.99e-01  
13-Jun-2017 18:30:00, 2.99e-01  
13-Jun-2017 18:45:00, 2.99e-01  
13-Jun-2017 19:00:00, 2.99e-01  
13-Jun-2017 19:15:00, 2.99e-01  
13-Jun-2017 19:30:00, 2.99e-01  
13-Jun-2017 19:45:00, 2.99e-01  
13-Jun-2017 20:00:00, 2.99e-01  
13-Jun-2017 20:15:00, 2.99e-01  
13-Jun-2017 20:30:00, 2.99e-01  
13-Jun-2017 20:45:00, 2.99e-01  
13-Jun-2017 21:00:00, 2.99e-01  
13-Jun-2017 21:15:00, 2.99e-01  
13-Jun-2017 21:30:00, 2.99e-01  
13-Jun-2017 21:45:00, 2.99e-01  
13-Jun-2017 22:00:00, 2.99e-01  
13-Jun-2017 22:15:00, 2.99e-01  
13-Jun-2017 22:30:00, 2.99e-01  
13-Jun-2017 22:45:00, 2.99e-01  
13-Jun-2017 23:00:00, 2.99e-01  
13-Jun-2017 23:15:00, 2.99e-01  
13-Jun-2017 23:30:00, 2.99e-01  
13-Jun-2017 23:45:00, 2.99e-01  
14-Jun-2017, 2.99e-01  
14-Jun-2017 00:15:00, 2.99e-01  
14-Jun-2017 00:30:00, 2.99e-01  
14-Jun-2017 00:45:00, 2.99e-01  
14-Jun-2017 01:00:00, 2.99e-01  
14-Jun-2017 01:15:00, 2.99e-01  
14-Jun-2017 01:30:00, 2.99e-01

|             |           |          |
|-------------|-----------|----------|
| 14-Jun-2017 | 01:45:00, | 2.99e-01 |
| 14-Jun-2017 | 02:00:00, | 2.99e-01 |
| 14-Jun-2017 | 02:15:00, | 2.99e-01 |
| 14-Jun-2017 | 02:30:00, | 2.99e-01 |
| 14-Jun-2017 | 02:45:00, | 2.99e-01 |
| 14-Jun-2017 | 03:00:00, | 2.99e-01 |
| 14-Jun-2017 | 03:15:00, | 2.99e-01 |
| 14-Jun-2017 | 03:30:00, | 2.98e-01 |
| 14-Jun-2017 | 03:45:00, | 2.99e-01 |
| 14-Jun-2017 | 04:00:00, | 2.98e-01 |
| 14-Jun-2017 | 04:15:00, | 2.98e-01 |
| 14-Jun-2017 | 04:30:00, | 2.98e-01 |
| 14-Jun-2017 | 04:45:00, | 2.99e-01 |
| 14-Jun-2017 | 05:00:00, | 2.98e-01 |
| 14-Jun-2017 | 05:15:00, | 2.98e-01 |
| 14-Jun-2017 | 05:30:00, | 2.98e-01 |
| 14-Jun-2017 | 05:45:00, | 2.98e-01 |
| 14-Jun-2017 | 06:00:00, | 2.98e-01 |
| 14-Jun-2017 | 06:15:00, | 2.98e-01 |
| 14-Jun-2017 | 06:30:00, | 2.98e-01 |
| 14-Jun-2017 | 06:45:00, | 2.98e-01 |
| 14-Jun-2017 | 07:00:00, | 2.98e-01 |
| 14-Jun-2017 | 07:15:00, | 2.98e-01 |
| 14-Jun-2017 | 07:30:00, | 2.98e-01 |
| 14-Jun-2017 | 07:45:00, | 2.98e-01 |
| 14-Jun-2017 | 08:00:00, | 2.98e-01 |
| 14-Jun-2017 | 08:15:00, | 2.98e-01 |
| 14-Jun-2017 | 08:30:00, | 2.98e-01 |
| 14-Jun-2017 | 08:45:00, | 2.98e-01 |
| 14-Jun-2017 | 09:00:00, | 2.98e-01 |
| 14-Jun-2017 | 09:15:00, | 2.98e-01 |
| 14-Jun-2017 | 09:30:00, | 2.98e-01 |
| 14-Jun-2017 | 09:45:00, | 2.98e-01 |
| 14-Jun-2017 | 10:00:00, | 2.98e-01 |
| 14-Jun-2017 | 10:15:00, | 2.98e-01 |
| 14-Jun-2017 | 10:30:00, | 2.98e-01 |
| 14-Jun-2017 | 10:45:00, | 2.98e-01 |
| 14-Jun-2017 | 11:00:00, | 2.98e-01 |
| 14-Jun-2017 | 11:15:00, | 2.98e-01 |
| 14-Jun-2017 | 11:30:00, | 2.98e-01 |
| 14-Jun-2017 | 11:45:00, | 2.98e-01 |
| 14-Jun-2017 | 12:00:00, | 2.98e-01 |
| 14-Jun-2017 | 12:15:00, | 2.98e-01 |
| 14-Jun-2017 | 12:30:00, | 2.98e-01 |
| 14-Jun-2017 | 12:45:00, | 2.98e-01 |
| 14-Jun-2017 | 13:00:00, | 2.98e-01 |
| 14-Jun-2017 | 13:15:00, | 2.98e-01 |
| 14-Jun-2017 | 13:30:00, | 2.98e-01 |
| 14-Jun-2017 | 13:45:00, | 2.98e-01 |
| 14-Jun-2017 | 14:00:00, | 2.98e-01 |
| 14-Jun-2017 | 14:15:00, | 2.98e-01 |
| 14-Jun-2017 | 14:30:00, | 2.98e-01 |
| 14-Jun-2017 | 14:45:00, | 2.98e-01 |
| 14-Jun-2017 | 15:00:00, | 2.98e-01 |
| 14-Jun-2017 | 15:15:00, | 2.98e-01 |
| 14-Jun-2017 | 15:30:00, | 2.98e-01 |
| 14-Jun-2017 | 15:45:00, | 2.98e-01 |
| 14-Jun-2017 | 16:00:00, | 2.98e-01 |
| 14-Jun-2017 | 16:15:00, | 2.98e-01 |
| 14-Jun-2017 | 16:30:00, | 2.98e-01 |
| 14-Jun-2017 | 16:45:00, | 2.98e-01 |
| 14-Jun-2017 | 17:00:00, | 2.98e-01 |
| 14-Jun-2017 | 17:15:00, | 2.98e-01 |
| 14-Jun-2017 | 17:30:00, | 2.98e-01 |

14-Jun-2017 17:45:00, 2.98e-01  
14-Jun-2017 18:00:00, 2.98e-01  
14-Jun-2017 18:15:00, 2.98e-01  
14-Jun-2017 18:30:00, 2.98e-01  
14-Jun-2017 18:45:00, 2.98e-01  
14-Jun-2017 19:00:00, 2.98e-01  
14-Jun-2017 19:15:00, 2.98e-01  
14-Jun-2017 19:30:00, 2.98e-01  
14-Jun-2017 19:45:00, 2.98e-01  
14-Jun-2017 20:00:00, 2.98e-01  
14-Jun-2017 20:15:00, 2.98e-01  
14-Jun-2017 20:30:00, 2.98e-01  
14-Jun-2017 20:45:00, 2.98e-01  
14-Jun-2017 21:00:00, 2.98e-01  
14-Jun-2017 21:15:00, 2.98e-01  
14-Jun-2017 21:30:00, 2.98e-01  
14-Jun-2017 21:45:00, 2.98e-01  
14-Jun-2017 22:00:00, 2.98e-01  
14-Jun-2017 22:15:00, 2.98e-01  
14-Jun-2017 22:30:00, 2.98e-01  
14-Jun-2017 22:45:00, 2.98e-01  
14-Jun-2017 23:00:00, 2.98e-01  
14-Jun-2017 23:15:00, 2.98e-01  
14-Jun-2017 23:30:00, 2.98e-01  
14-Jun-2017 23:45:00, 2.98e-01  
15-Jun-2017, 2.98e-01  
15-Jun-2017 00:15:00, 2.98e-01  
15-Jun-2017 00:30:00, 2.98e-01  
15-Jun-2017 00:45:00, 2.98e-01  
15-Jun-2017 01:00:00, 2.98e-01  
15-Jun-2017 01:15:00, 2.98e-01  
15-Jun-2017 01:30:00, 2.98e-01  
15-Jun-2017 01:45:00, 2.98e-01  
15-Jun-2017 02:00:00, 2.98e-01  
15-Jun-2017 02:15:00, 2.98e-01  
15-Jun-2017 02:30:00, 2.98e-01  
15-Jun-2017 02:45:00, 2.98e-01  
15-Jun-2017 03:00:00, 2.98e-01  
15-Jun-2017 03:15:00, 2.97e-01  
15-Jun-2017 03:30:00, 2.98e-01  
15-Jun-2017 03:45:00, 2.98e-01  
15-Jun-2017 04:00:00, 2.98e-01  
15-Jun-2017 04:15:00, 2.98e-01  
15-Jun-2017 04:30:00, 2.98e-01  
15-Jun-2017 04:45:00, 2.98e-01  
15-Jun-2017 05:00:00, 2.98e-01  
15-Jun-2017 05:15:00, 2.98e-01  
15-Jun-2017 05:30:00, 2.97e-01  
15-Jun-2017 05:45:00, 2.97e-01  
15-Jun-2017 06:00:00, 2.97e-01  
15-Jun-2017 06:15:00, 2.97e-01  
15-Jun-2017 06:30:00, 2.97e-01  
15-Jun-2017 06:45:00, 2.97e-01  
15-Jun-2017 07:00:00, 2.97e-01  
15-Jun-2017 07:15:00, 2.97e-01  
15-Jun-2017 07:30:00, 2.97e-01  
15-Jun-2017 07:45:00, 2.97e-01  
15-Jun-2017 08:00:00, 2.97e-01  
15-Jun-2017 08:15:00, 2.97e-01  
15-Jun-2017 08:30:00, 2.97e-01  
15-Jun-2017 08:45:00, 2.97e-01  
15-Jun-2017 09:00:00, 2.97e-01  
15-Jun-2017 09:15:00, 2.97e-01  
15-Jun-2017 09:30:00, 2.97e-01

15-Jun-2017 09:45:00, 2.97e-01  
15-Jun-2017 10:00:00, 2.97e-01  
15-Jun-2017 10:15:00, 2.97e-01  
15-Jun-2017 10:30:00, 2.97e-01  
15-Jun-2017 10:45:00, 2.97e-01  
15-Jun-2017 11:00:00, 2.97e-01  
15-Jun-2017 11:15:00, 2.97e-01  
15-Jun-2017 11:30:00, 2.97e-01  
15-Jun-2017 11:45:00, 2.97e-01  
15-Jun-2017 12:00:00, 2.97e-01  
15-Jun-2017 12:15:00, 2.97e-01  
15-Jun-2017 12:30:00, 2.97e-01  
15-Jun-2017 12:45:00, 2.97e-01  
15-Jun-2017 13:00:00, 2.97e-01  
15-Jun-2017 13:15:00, 2.97e-01  
15-Jun-2017 13:30:00, 2.97e-01  
15-Jun-2017 13:45:00, 2.97e-01  
15-Jun-2017 14:00:00, 2.97e-01  
15-Jun-2017 14:15:00, 2.97e-01  
15-Jun-2017 14:30:00, 2.97e-01  
15-Jun-2017 14:45:00, 2.97e-01  
15-Jun-2017 15:00:00, 2.97e-01  
15-Jun-2017 15:15:00, 2.97e-01  
15-Jun-2017 15:30:00, 2.97e-01  
15-Jun-2017 15:45:00, 2.97e-01  
15-Jun-2017 16:00:00, 2.97e-01  
15-Jun-2017 16:15:00, 2.97e-01  
15-Jun-2017 16:30:00, 2.97e-01  
15-Jun-2017 16:45:00, 2.97e-01  
15-Jun-2017 17:00:00, 2.97e-01  
15-Jun-2017 17:15:00, 2.97e-01  
15-Jun-2017 17:30:00, 2.97e-01  
15-Jun-2017 17:45:00, 2.97e-01  
15-Jun-2017 18:00:00, 2.97e-01  
15-Jun-2017 18:15:00, 2.97e-01  
15-Jun-2017 18:30:00, 2.97e-01  
15-Jun-2017 18:45:00, 2.97e-01  
15-Jun-2017 19:00:00, 2.97e-01  
15-Jun-2017 19:15:00, 2.97e-01  
15-Jun-2017 19:30:00, 2.97e-01  
15-Jun-2017 19:45:00, 2.97e-01  
15-Jun-2017 20:00:00, 2.97e-01  
15-Jun-2017 20:15:00, 2.97e-01  
15-Jun-2017 20:30:00, 2.97e-01  
15-Jun-2017 20:45:00, 2.97e-01  
15-Jun-2017 21:00:00, 2.97e-01  
15-Jun-2017 21:15:00, 2.97e-01  
15-Jun-2017 21:30:00, 2.97e-01  
15-Jun-2017 21:45:00, 2.97e-01  
15-Jun-2017 22:00:00, 2.97e-01  
15-Jun-2017 22:15:00, 2.97e-01  
15-Jun-2017 22:30:00, 2.97e-01  
15-Jun-2017 22:45:00, 2.97e-01  
15-Jun-2017 23:00:00, 2.97e-01  
15-Jun-2017 23:15:00, 2.97e-01  
15-Jun-2017 23:30:00, 2.97e-01  
15-Jun-2017 23:45:00, 2.97e-01  
16-Jun-2017, 2.97e-01  
16-Jun-2017 00:15:00, 2.97e-01  
16-Jun-2017 00:30:00, 2.97e-01  
16-Jun-2017 00:45:00, 2.97e-01  
16-Jun-2017 01:00:00, 2.97e-01  
16-Jun-2017 01:15:00, 2.97e-01  
16-Jun-2017 01:30:00, 2.97e-01

|             |           |          |
|-------------|-----------|----------|
| 16-Jun-2017 | 01:45:00, | 2.97e-01 |
| 16-Jun-2017 | 02:00:00, | 2.97e-01 |
| 16-Jun-2017 | 02:15:00, | 2.97e-01 |
| 16-Jun-2017 | 02:30:00, | 2.97e-01 |
| 16-Jun-2017 | 02:45:00, | 2.97e-01 |
| 16-Jun-2017 | 03:00:00, | 2.97e-01 |
| 16-Jun-2017 | 03:15:00, | 2.97e-01 |
| 16-Jun-2017 | 03:30:00, | 2.97e-01 |
| 16-Jun-2017 | 03:45:00, | 2.97e-01 |
| 16-Jun-2017 | 04:00:00, | 2.97e-01 |
| 16-Jun-2017 | 04:15:00, | 2.97e-01 |
| 16-Jun-2017 | 04:30:00, | 2.97e-01 |
| 16-Jun-2017 | 04:45:00, | 2.97e-01 |
| 16-Jun-2017 | 05:00:00, | 2.97e-01 |
| 16-Jun-2017 | 05:15:00, | 2.97e-01 |
| 16-Jun-2017 | 05:30:00, | 2.97e-01 |
| 16-Jun-2017 | 05:45:00, | 2.97e-01 |
| 16-Jun-2017 | 06:00:00, | 2.97e-01 |
| 16-Jun-2017 | 06:15:00, | 2.97e-01 |
| 16-Jun-2017 | 06:30:00, | 2.97e-01 |
| 16-Jun-2017 | 06:45:00, | 2.97e-01 |
| 16-Jun-2017 | 07:00:00, | 2.97e-01 |
| 16-Jun-2017 | 07:15:00, | 2.97e-01 |
| 16-Jun-2017 | 07:30:00, | 2.97e-01 |
| 16-Jun-2017 | 07:45:00, | 2.97e-01 |
| 16-Jun-2017 | 08:00:00, | 2.97e-01 |
| 16-Jun-2017 | 08:15:00, | 2.97e-01 |
| 16-Jun-2017 | 08:30:00, | 2.96e-01 |
| 16-Jun-2017 | 08:45:00, | 2.96e-01 |
| 16-Jun-2017 | 09:00:00, | 2.96e-01 |
| 16-Jun-2017 | 09:15:00, | 2.96e-01 |
| 16-Jun-2017 | 09:30:00, | 2.96e-01 |
| 16-Jun-2017 | 09:45:00, | 2.96e-01 |
| 16-Jun-2017 | 10:00:00, | 2.96e-01 |
| 16-Jun-2017 | 10:15:00, | 2.96e-01 |
| 16-Jun-2017 | 10:30:00, | 2.96e-01 |
| 16-Jun-2017 | 10:45:00, | 2.96e-01 |
| 16-Jun-2017 | 11:00:00, | 2.96e-01 |
| 16-Jun-2017 | 11:15:00, | 2.96e-01 |
| 16-Jun-2017 | 11:30:00, | 2.96e-01 |
| 16-Jun-2017 | 11:45:00, | 2.96e-01 |
| 16-Jun-2017 | 12:00:00, | 2.96e-01 |
| 16-Jun-2017 | 12:15:00, | 2.96e-01 |
| 16-Jun-2017 | 12:30:00, | 2.96e-01 |
| 16-Jun-2017 | 12:45:00, | 2.96e-01 |
| 16-Jun-2017 | 13:00:00, | 2.96e-01 |
| 16-Jun-2017 | 13:15:00, | 2.96e-01 |
| 16-Jun-2017 | 13:30:00, | 2.96e-01 |
| 16-Jun-2017 | 13:45:00, | 2.96e-01 |
| 16-Jun-2017 | 14:00:00, | 2.96e-01 |
| 16-Jun-2017 | 14:15:00, | 2.96e-01 |
| 16-Jun-2017 | 14:30:00, | 2.96e-01 |
| 16-Jun-2017 | 14:45:00, | 2.96e-01 |
| 16-Jun-2017 | 15:00:00, | 2.96e-01 |
| 16-Jun-2017 | 15:15:00, | 2.96e-01 |
| 16-Jun-2017 | 15:30:00, | 2.96e-01 |
| 16-Jun-2017 | 15:45:00, | 2.96e-01 |
| 16-Jun-2017 | 16:00:00, | 2.97e-01 |
| 16-Jun-2017 | 16:15:00, | 2.97e-01 |
| 16-Jun-2017 | 16:30:00, | 2.97e-01 |
| 16-Jun-2017 | 16:45:00, | 2.97e-01 |
| 16-Jun-2017 | 17:00:00, | 2.97e-01 |
| 16-Jun-2017 | 17:15:00, | 2.97e-01 |
| 16-Jun-2017 | 17:30:00, | 2.97e-01 |



16-Jun-2017 17:45:00, 2.97e-01  
16-Jun-2017 18:00:00, 2.97e-01  
16-Jun-2017 18:15:00, 2.97e-01  
16-Jun-2017 18:30:00, 2.97e-01  
16-Jun-2017 18:45:00, 2.97e-01  
16-Jun-2017 19:00:00, 2.97e-01  
16-Jun-2017 19:15:00, 2.97e-01  
16-Jun-2017 19:30:00, 2.97e-01  
16-Jun-2017 19:45:00, 2.97e-01  
16-Jun-2017 20:00:00, 2.97e-01  
16-Jun-2017 20:15:00, 2.97e-01  
16-Jun-2017 20:30:00, 2.97e-01  
16-Jun-2017 20:45:00, 2.97e-01  
16-Jun-2017 21:00:00, 2.97e-01  
16-Jun-2017 21:15:00, 2.97e-01  
16-Jun-2017 21:30:00, 2.97e-01  
16-Jun-2017 21:45:00, 2.97e-01  
16-Jun-2017 22:00:00, 2.97e-01  
16-Jun-2017 22:15:00, 2.97e-01  
16-Jun-2017 22:30:00, 2.97e-01  
16-Jun-2017 22:45:00, 2.97e-01  
16-Jun-2017 23:00:00, 2.97e-01  
16-Jun-2017 23:15:00, 2.97e-01  
16-Jun-2017 23:30:00, 2.97e-01  
16-Jun-2017 23:45:00, 2.97e-01  
17-Jun-2017, 2.97e-01  
17-Jun-2017 00:15:00, 2.97e-01  
17-Jun-2017 00:30:00, 2.97e-01  
17-Jun-2017 00:45:00, 2.97e-01  
17-Jun-2017 01:00:00, 2.96e-01  
17-Jun-2017 01:15:00, 2.96e-01  
17-Jun-2017 01:30:00, 2.96e-01  
17-Jun-2017 01:45:00, 2.96e-01  
17-Jun-2017 02:00:00, 2.96e-01  
17-Jun-2017 02:15:00, 2.96e-01  
17-Jun-2017 02:30:00, 2.96e-01  
17-Jun-2017 02:45:00, 2.96e-01  
17-Jun-2017 03:00:00, 2.96e-01  
17-Jun-2017 03:15:00, 2.96e-01  
17-Jun-2017 03:30:00, 2.95e-01  
17-Jun-2017 03:45:00, 2.95e-01  
17-Jun-2017 04:00:00, 2.95e-01  
17-Jun-2017 04:15:00, 2.95e-01  
17-Jun-2017 04:30:00, 2.95e-01  
17-Jun-2017 04:45:00, 2.95e-01  
17-Jun-2017 05:00:00, 2.95e-01  
17-Jun-2017 05:15:00, 2.95e-01  
17-Jun-2017 05:30:00, 2.95e-01  
17-Jun-2017 05:45:00, 2.95e-01  
17-Jun-2017 06:00:00, 2.95e-01  
17-Jun-2017 06:15:00, 2.95e-01  
17-Jun-2017 06:30:00, 2.95e-01  
17-Jun-2017 06:45:00, 2.95e-01  
17-Jun-2017 07:00:00, 2.95e-01  
17-Jun-2017 07:15:00, 2.95e-01  
17-Jun-2017 07:30:00, 2.95e-01  
17-Jun-2017 07:45:00, 2.95e-01  
17-Jun-2017 08:00:00, 2.95e-01  
17-Jun-2017 08:15:00, 2.95e-01  
17-Jun-2017 08:30:00, 2.95e-01  
17-Jun-2017 08:45:00, 2.95e-01  
17-Jun-2017 09:00:00, 2.95e-01  
17-Jun-2017 09:15:00, 2.95e-01  
17-Jun-2017 09:30:00, 2.95e-01

17-Jun-2017 09:45:00, 2.95e-01  
17-Jun-2017 10:00:00, 2.95e-01  
17-Jun-2017 10:15:00, 2.95e-01  
17-Jun-2017 10:30:00, 2.95e-01  
17-Jun-2017 10:45:00, 2.95e-01  
17-Jun-2017 11:00:00, 2.95e-01  
17-Jun-2017 11:15:00, 2.95e-01  
17-Jun-2017 11:30:00, 2.95e-01  
17-Jun-2017 11:45:00, 2.95e-01  
17-Jun-2017 12:00:00, 2.95e-01  
17-Jun-2017 12:15:00, 2.95e-01  
17-Jun-2017 12:30:00, 2.95e-01  
17-Jun-2017 12:45:00, 2.95e-01  
17-Jun-2017 13:00:00, 2.95e-01  
17-Jun-2017 13:15:00, 2.95e-01  
17-Jun-2017 13:30:00, 2.95e-01  
17-Jun-2017 13:45:00, 2.95e-01  
17-Jun-2017 14:00:00, 2.95e-01  
17-Jun-2017 14:15:00, 2.95e-01  
17-Jun-2017 14:30:00, 2.95e-01  
17-Jun-2017 14:45:00, 2.95e-01  
17-Jun-2017 15:00:00, 2.95e-01  
17-Jun-2017 15:15:00, 2.95e-01  
17-Jun-2017 15:30:00, 2.95e-01  
17-Jun-2017 15:45:00, 2.95e-01  
17-Jun-2017 16:00:00, 2.95e-01  
17-Jun-2017 16:15:00, 2.95e-01  
17-Jun-2017 16:30:00, 2.95e-01  
17-Jun-2017 16:45:00, 2.94e-01  
17-Jun-2017 17:00:00, 2.94e-01  
17-Jun-2017 17:15:00, 2.94e-01  
17-Jun-2017 17:30:00, 2.94e-01  
17-Jun-2017 17:45:00, 2.94e-01  
17-Jun-2017 18:00:00, 2.94e-01  
17-Jun-2017 18:15:00, 2.94e-01  
17-Jun-2017 18:30:00, 2.94e-01  
17-Jun-2017 18:45:00, 2.94e-01  
17-Jun-2017 19:00:00, 2.94e-01  
17-Jun-2017 19:15:00, 2.94e-01  
17-Jun-2017 19:30:00, 2.94e-01  
17-Jun-2017 19:45:00, 2.94e-01  
17-Jun-2017 20:00:00, 2.94e-01  
17-Jun-2017 20:15:00, 2.94e-01  
17-Jun-2017 20:30:00, 2.94e-01  
17-Jun-2017 20:45:00, 2.94e-01  
17-Jun-2017 21:00:00, 2.94e-01  
17-Jun-2017 21:15:00, 2.94e-01  
17-Jun-2017 21:30:00, 2.94e-01  
17-Jun-2017 21:45:00, 2.94e-01  
17-Jun-2017 22:00:00, 2.94e-01  
17-Jun-2017 22:15:00, 2.94e-01  
17-Jun-2017 22:30:00, 2.94e-01  
17-Jun-2017 22:45:00, 2.94e-01  
17-Jun-2017 23:00:00, 2.94e-01  
17-Jun-2017 23:15:00, 2.94e-01  
17-Jun-2017 23:30:00, 2.94e-01  
17-Jun-2017 23:45:00, 2.94e-01  
18-Jun-2017, 2.94e-01  
18-Jun-2017 00:15:00, 2.94e-01  
18-Jun-2017 00:30:00, 2.94e-01  
18-Jun-2017 00:45:00, 2.94e-01  
18-Jun-2017 01:00:00, 2.94e-01  
18-Jun-2017 01:15:00, 2.94e-01  
18-Jun-2017 01:30:00, 2.94e-01

|             |           |          |
|-------------|-----------|----------|
| 18-Jun-2017 | 01:45:00, | 2.94e-01 |
| 18-Jun-2017 | 02:00:00, | 2.94e-01 |
| 18-Jun-2017 | 02:15:00, | 2.94e-01 |
| 18-Jun-2017 | 02:30:00, | 2.94e-01 |
| 18-Jun-2017 | 02:45:00, | 2.94e-01 |
| 18-Jun-2017 | 03:00:00, | 2.94e-01 |
| 18-Jun-2017 | 03:15:00, | 2.94e-01 |
| 18-Jun-2017 | 03:30:00, | 2.94e-01 |
| 18-Jun-2017 | 03:45:00, | 2.94e-01 |
| 18-Jun-2017 | 04:00:00, | 2.94e-01 |
| 18-Jun-2017 | 04:15:00, | 2.94e-01 |
| 18-Jun-2017 | 04:30:00, | 2.94e-01 |
| 18-Jun-2017 | 04:45:00, | 2.94e-01 |
| 18-Jun-2017 | 05:00:00, | 2.94e-01 |
| 18-Jun-2017 | 05:15:00, | 2.94e-01 |
| 18-Jun-2017 | 05:30:00, | 2.94e-01 |
| 18-Jun-2017 | 05:45:00, | 2.95e-01 |
| 18-Jun-2017 | 06:00:00, | 2.95e-01 |
| 18-Jun-2017 | 06:15:00, | 2.95e-01 |
| 18-Jun-2017 | 06:30:00, | 2.95e-01 |
| 18-Jun-2017 | 06:45:00, | 2.95e-01 |
| 18-Jun-2017 | 07:00:00, | 2.94e-01 |
| 18-Jun-2017 | 07:15:00, | 2.94e-01 |
| 18-Jun-2017 | 07:30:00, | 2.94e-01 |
| 18-Jun-2017 | 07:45:00, | 2.95e-01 |
| 18-Jun-2017 | 08:00:00, | 2.95e-01 |
| 18-Jun-2017 | 08:15:00, | 2.95e-01 |
| 18-Jun-2017 | 08:30:00, | 2.95e-01 |
| 18-Jun-2017 | 08:45:00, | 2.95e-01 |
| 18-Jun-2017 | 09:00:00, | 2.95e-01 |
| 18-Jun-2017 | 09:15:00, | 2.95e-01 |
| 18-Jun-2017 | 09:30:00, | 2.95e-01 |
| 18-Jun-2017 | 09:45:00, | 2.95e-01 |
| 18-Jun-2017 | 10:00:00, | 2.95e-01 |
| 18-Jun-2017 | 10:15:00, | 2.95e-01 |
| 18-Jun-2017 | 10:30:00, | 2.95e-01 |
| 18-Jun-2017 | 10:45:00, | 2.95e-01 |
| 18-Jun-2017 | 11:00:00, | 2.95e-01 |
| 18-Jun-2017 | 11:15:00, | 2.95e-01 |
| 18-Jun-2017 | 11:30:00, | 2.94e-01 |
| 18-Jun-2017 | 11:45:00, | 2.94e-01 |
| 18-Jun-2017 | 12:00:00, | 2.94e-01 |
| 18-Jun-2017 | 12:15:00, | 2.94e-01 |
| 18-Jun-2017 | 12:30:00, | 2.95e-01 |
| 18-Jun-2017 | 12:45:00, | 2.95e-01 |
| 18-Jun-2017 | 13:00:00, | 2.95e-01 |
| 18-Jun-2017 | 13:15:00, | 2.95e-01 |
| 18-Jun-2017 | 13:30:00, | NaN      |
| 18-Jun-2017 | 13:45:00, | NaN      |
| 18-Jun-2017 | 14:00:00, | NaN      |
| 18-Jun-2017 | 14:15:00, | NaN      |
| 18-Jun-2017 | 14:30:00, | NaN      |
| 18-Jun-2017 | 14:45:00, | NaN      |
| 18-Jun-2017 | 15:00:00, | NaN      |
| 18-Jun-2017 | 15:15:00, | NaN      |
| 18-Jun-2017 | 15:30:00, | NaN      |
| 18-Jun-2017 | 15:45:00, | NaN      |
| 18-Jun-2017 | 16:00:00, | NaN      |
| 18-Jun-2017 | 16:15:00, | NaN      |
| 18-Jun-2017 | 16:30:00, | NaN      |
| 18-Jun-2017 | 16:45:00, | NaN      |
| 18-Jun-2017 | 17:00:00, | NaN      |
| 18-Jun-2017 | 17:15:00, | NaN      |
| 18-Jun-2017 | 17:30:00, | NaN      |

|              |           |     |
|--------------|-----------|-----|
| 18-Jun-2017  | 17:45:00, | NaN |
| 18-Jun-2017  | 18:00:00, | NaN |
| 18-Jun-2017  | 18:15:00, | NaN |
| 18-Jun-2017  | 18:30:00, | NaN |
| 18-Jun-2017  | 18:45:00, | NaN |
| 18-Jun-2017  | 19:00:00, | NaN |
| 18-Jun-2017  | 19:15:00, | NaN |
| 18-Jun-2017  | 19:30:00, | NaN |
| 18-Jun-2017  | 19:45:00, | NaN |
| 18-Jun-2017  | 20:00:00, | NaN |
| 18-Jun-2017  | 20:15:00, | NaN |
| 18-Jun-2017  | 20:30:00, | NaN |
| 18-Jun-2017  | 20:45:00, | NaN |
| 18-Jun-2017  | 21:00:00, | NaN |
| 18-Jun-2017  | 21:15:00, | NaN |
| 18-Jun-2017  | 21:30:00, | NaN |
| 18-Jun-2017  | 21:45:00, | NaN |
| 18-Jun-2017  | 22:00:00, | NaN |
| 18-Jun-2017  | 22:15:00, | NaN |
| 18-Jun-2017  | 22:30:00, | NaN |
| 18-Jun-2017  | 22:45:00, | NaN |
| 18-Jun-2017  | 23:00:00, | NaN |
| 18-Jun-2017  | 23:15:00, | NaN |
| 18-Jun-2017  | 23:30:00, | NaN |
| 18-Jun-2017  | 23:45:00, | NaN |
| 19-Jun-2017, | NaN       |     |
| 19-Jun-2017  | 00:15:00, | NaN |
| 19-Jun-2017  | 00:30:00, | NaN |
| 19-Jun-2017  | 00:45:00, | NaN |
| 19-Jun-2017  | 01:00:00, | NaN |
| 19-Jun-2017  | 01:15:00, | NaN |
| 19-Jun-2017  | 01:30:00, | NaN |
| 19-Jun-2017  | 01:45:00, | NaN |
| 19-Jun-2017  | 02:00:00, | NaN |
| 19-Jun-2017  | 02:15:00, | NaN |
| 19-Jun-2017  | 02:30:00, | NaN |
| 19-Jun-2017  | 02:45:00, | NaN |
| 19-Jun-2017  | 03:00:00, | NaN |
| 19-Jun-2017  | 03:15:00, | NaN |
| 19-Jun-2017  | 03:30:00, | NaN |
| 19-Jun-2017  | 03:45:00, | NaN |
| 19-Jun-2017  | 04:00:00, | NaN |
| 19-Jun-2017  | 04:15:00, | NaN |
| 19-Jun-2017  | 04:30:00, | NaN |
| 19-Jun-2017  | 04:45:00, | NaN |
| 19-Jun-2017  | 05:00:00, | NaN |
| 19-Jun-2017  | 05:15:00, | NaN |
| 19-Jun-2017  | 05:30:00, | NaN |
| 19-Jun-2017  | 05:45:00, | NaN |
| 19-Jun-2017  | 06:00:00, | NaN |
| 19-Jun-2017  | 06:15:00, | NaN |
| 19-Jun-2017  | 06:30:00, | NaN |
| 19-Jun-2017  | 06:45:00, | NaN |
| 19-Jun-2017  | 07:00:00, | NaN |
| 19-Jun-2017  | 07:15:00, | NaN |
| 19-Jun-2017  | 07:30:00, | NaN |
| 19-Jun-2017  | 07:45:00, | NaN |
| 19-Jun-2017  | 08:00:00, | NaN |
| 19-Jun-2017  | 08:15:00, | NaN |
| 19-Jun-2017  | 08:30:00, | NaN |
| 19-Jun-2017  | 08:45:00, | NaN |
| 19-Jun-2017  | 09:00:00, | NaN |
| 19-Jun-2017  | 09:15:00, | NaN |
| 19-Jun-2017  | 09:30:00, | NaN |

|              |           |     |
|--------------|-----------|-----|
| 19-Jun-2017  | 09:45:00, | NaN |
| 19-Jun-2017  | 10:00:00, | NaN |
| 19-Jun-2017  | 10:15:00, | NaN |
| 19-Jun-2017  | 10:30:00, | NaN |
| 19-Jun-2017  | 10:45:00, | NaN |
| 19-Jun-2017  | 11:00:00, | NaN |
| 19-Jun-2017  | 11:15:00, | NaN |
| 19-Jun-2017  | 11:30:00, | NaN |
| 19-Jun-2017  | 11:45:00, | NaN |
| 19-Jun-2017  | 12:00:00, | NaN |
| 19-Jun-2017  | 12:15:00, | NaN |
| 19-Jun-2017  | 12:30:00, | NaN |
| 19-Jun-2017  | 12:45:00, | NaN |
| 19-Jun-2017  | 13:00:00, | NaN |
| 19-Jun-2017  | 13:15:00, | NaN |
| 19-Jun-2017  | 13:30:00, | NaN |
| 19-Jun-2017  | 13:45:00, | NaN |
| 19-Jun-2017  | 14:00:00, | NaN |
| 19-Jun-2017  | 14:15:00, | NaN |
| 19-Jun-2017  | 14:30:00, | NaN |
| 19-Jun-2017  | 14:45:00, | NaN |
| 19-Jun-2017  | 15:00:00, | NaN |
| 19-Jun-2017  | 15:15:00, | NaN |
| 19-Jun-2017  | 15:30:00, | NaN |
| 19-Jun-2017  | 15:45:00, | NaN |
| 19-Jun-2017  | 16:00:00, | NaN |
| 19-Jun-2017  | 16:15:00, | NaN |
| 19-Jun-2017  | 16:30:00, | NaN |
| 19-Jun-2017  | 16:45:00, | NaN |
| 19-Jun-2017  | 17:00:00, | NaN |
| 19-Jun-2017  | 17:15:00, | NaN |
| 19-Jun-2017  | 17:30:00, | NaN |
| 19-Jun-2017  | 17:45:00, | NaN |
| 19-Jun-2017  | 18:00:00, | NaN |
| 19-Jun-2017  | 18:15:00, | NaN |
| 19-Jun-2017  | 18:30:00, | NaN |
| 19-Jun-2017  | 18:45:00, | NaN |
| 19-Jun-2017  | 19:00:00, | NaN |
| 19-Jun-2017  | 19:15:00, | NaN |
| 19-Jun-2017  | 19:30:00, | NaN |
| 19-Jun-2017  | 19:45:00, | NaN |
| 19-Jun-2017  | 20:00:00, | NaN |
| 19-Jun-2017  | 20:15:00, | NaN |
| 19-Jun-2017  | 20:30:00, | NaN |
| 19-Jun-2017  | 20:45:00, | NaN |
| 19-Jun-2017  | 21:00:00, | NaN |
| 19-Jun-2017  | 21:15:00, | NaN |
| 19-Jun-2017  | 21:30:00, | NaN |
| 19-Jun-2017  | 21:45:00, | NaN |
| 19-Jun-2017  | 22:00:00, | NaN |
| 19-Jun-2017  | 22:15:00, | NaN |
| 19-Jun-2017  | 22:30:00, | NaN |
| 19-Jun-2017  | 22:45:00, | NaN |
| 19-Jun-2017  | 23:00:00, | NaN |
| 19-Jun-2017  | 23:15:00, | NaN |
| 19-Jun-2017  | 23:30:00, | NaN |
| 19-Jun-2017  | 23:45:00, | NaN |
| 20-Jun-2017, | NaN       |     |
| 20-Jun-2017  | 00:15:00, | NaN |
| 20-Jun-2017  | 00:30:00, | NaN |
| 20-Jun-2017  | 00:45:00, | NaN |
| 20-Jun-2017  | 01:00:00, | NaN |
| 20-Jun-2017  | 01:15:00, | NaN |
| 20-Jun-2017  | 01:30:00, | NaN |

|             |           |     |
|-------------|-----------|-----|
| 20-Jun-2017 | 01:45:00, | NaN |
| 20-Jun-2017 | 02:00:00, | NaN |
| 20-Jun-2017 | 02:15:00, | NaN |
| 20-Jun-2017 | 02:30:00, | NaN |
| 20-Jun-2017 | 02:45:00, | NaN |
| 20-Jun-2017 | 03:00:00, | NaN |
| 20-Jun-2017 | 03:15:00, | NaN |
| 20-Jun-2017 | 03:30:00, | NaN |
| 20-Jun-2017 | 03:45:00, | NaN |
| 20-Jun-2017 | 04:00:00, | NaN |
| 20-Jun-2017 | 04:15:00, | NaN |
| 20-Jun-2017 | 04:30:00, | NaN |
| 20-Jun-2017 | 04:45:00, | NaN |
| 20-Jun-2017 | 05:00:00, | NaN |
| 20-Jun-2017 | 05:15:00, | NaN |
| 20-Jun-2017 | 05:30:00, | NaN |
| 20-Jun-2017 | 05:45:00, | NaN |
| 20-Jun-2017 | 06:00:00, | NaN |
| 20-Jun-2017 | 06:15:00, | NaN |
| 20-Jun-2017 | 06:30:00, | NaN |
| 20-Jun-2017 | 06:45:00, | NaN |
| 20-Jun-2017 | 07:00:00, | NaN |
| 20-Jun-2017 | 07:15:00, | NaN |
| 20-Jun-2017 | 07:30:00, | NaN |
| 20-Jun-2017 | 07:45:00, | NaN |
| 20-Jun-2017 | 08:00:00, | NaN |
| 20-Jun-2017 | 08:15:00, | NaN |
| 20-Jun-2017 | 08:30:00, | NaN |
| 20-Jun-2017 | 08:45:00, | NaN |
| 20-Jun-2017 | 09:00:00, | NaN |
| 20-Jun-2017 | 09:15:00, | NaN |
| 20-Jun-2017 | 09:30:00, | NaN |
| 20-Jun-2017 | 09:45:00, | NaN |
| 20-Jun-2017 | 10:00:00, | NaN |
| 20-Jun-2017 | 10:15:00, | NaN |
| 20-Jun-2017 | 10:30:00, | NaN |
| 20-Jun-2017 | 10:45:00, | NaN |
| 20-Jun-2017 | 11:00:00, | NaN |
| 20-Jun-2017 | 11:15:00, | NaN |
| 20-Jun-2017 | 11:30:00, | NaN |
| 20-Jun-2017 | 11:45:00, | NaN |
| 20-Jun-2017 | 12:00:00, | NaN |
| 20-Jun-2017 | 12:15:00, | NaN |
| 20-Jun-2017 | 12:30:00, | NaN |
| 20-Jun-2017 | 12:45:00, | NaN |
| 20-Jun-2017 | 13:00:00, | NaN |
| 20-Jun-2017 | 13:15:00, | NaN |
| 20-Jun-2017 | 13:30:00, | NaN |
| 20-Jun-2017 | 13:45:00, | NaN |
| 20-Jun-2017 | 14:00:00, | NaN |
| 20-Jun-2017 | 14:15:00, | NaN |
| 20-Jun-2017 | 14:30:00, | NaN |
| 20-Jun-2017 | 14:45:00, | NaN |
| 20-Jun-2017 | 15:00:00, | NaN |
| 20-Jun-2017 | 15:15:00, | NaN |
| 20-Jun-2017 | 15:30:00, | NaN |
| 20-Jun-2017 | 15:45:00, | NaN |
| 20-Jun-2017 | 16:00:00, | NaN |
| 20-Jun-2017 | 16:15:00, | NaN |
| 20-Jun-2017 | 16:30:00, | NaN |
| 20-Jun-2017 | 16:45:00, | NaN |
| 20-Jun-2017 | 17:00:00, | NaN |
| 20-Jun-2017 | 17:15:00, | NaN |
| 20-Jun-2017 | 17:30:00, | NaN |

|              |           |     |
|--------------|-----------|-----|
| 20-Jun-2017  | 17:45:00, | NaN |
| 20-Jun-2017  | 18:00:00, | NaN |
| 20-Jun-2017  | 18:15:00, | NaN |
| 20-Jun-2017  | 18:30:00, | NaN |
| 20-Jun-2017  | 18:45:00, | NaN |
| 20-Jun-2017  | 19:00:00, | NaN |
| 20-Jun-2017  | 19:15:00, | NaN |
| 20-Jun-2017  | 19:30:00, | NaN |
| 20-Jun-2017  | 19:45:00, | NaN |
| 20-Jun-2017  | 20:00:00, | NaN |
| 20-Jun-2017  | 20:15:00, | NaN |
| 20-Jun-2017  | 20:30:00, | NaN |
| 20-Jun-2017  | 20:45:00, | NaN |
| 20-Jun-2017  | 21:00:00, | NaN |
| 20-Jun-2017  | 21:15:00, | NaN |
| 20-Jun-2017  | 21:30:00, | NaN |
| 20-Jun-2017  | 21:45:00, | NaN |
| 20-Jun-2017  | 22:00:00, | NaN |
| 20-Jun-2017  | 22:15:00, | NaN |
| 20-Jun-2017  | 22:30:00, | NaN |
| 20-Jun-2017  | 22:45:00, | NaN |
| 20-Jun-2017  | 23:00:00, | NaN |
| 20-Jun-2017  | 23:15:00, | NaN |
| 20-Jun-2017  | 23:30:00, | NaN |
| 20-Jun-2017  | 23:45:00, | NaN |
| 21-Jun-2017, | NaN       |     |
| 21-Jun-2017  | 00:15:00, | NaN |
| 21-Jun-2017  | 00:30:00, | NaN |
| 21-Jun-2017  | 00:45:00, | NaN |
| 21-Jun-2017  | 01:00:00, | NaN |
| 21-Jun-2017  | 01:15:00, | NaN |
| 21-Jun-2017  | 01:30:00, | NaN |
| 21-Jun-2017  | 01:45:00, | NaN |
| 21-Jun-2017  | 02:00:00, | NaN |
| 21-Jun-2017  | 02:15:00, | NaN |
| 21-Jun-2017  | 02:30:00, | NaN |
| 21-Jun-2017  | 02:45:00, | NaN |
| 21-Jun-2017  | 03:00:00, | NaN |
| 21-Jun-2017  | 03:15:00, | NaN |
| 21-Jun-2017  | 03:30:00, | NaN |
| 21-Jun-2017  | 03:45:00, | NaN |
| 21-Jun-2017  | 04:00:00, | NaN |
| 21-Jun-2017  | 04:15:00, | NaN |
| 21-Jun-2017  | 04:30:00, | NaN |
| 21-Jun-2017  | 04:45:00, | NaN |
| 21-Jun-2017  | 05:00:00, | NaN |
| 21-Jun-2017  | 05:15:00, | NaN |
| 21-Jun-2017  | 05:30:00, | NaN |
| 21-Jun-2017  | 05:45:00, | NaN |
| 21-Jun-2017  | 06:00:00, | NaN |
| 21-Jun-2017  | 06:15:00, | NaN |
| 21-Jun-2017  | 06:30:00, | NaN |
| 21-Jun-2017  | 06:45:00, | NaN |
| 21-Jun-2017  | 07:00:00, | NaN |
| 21-Jun-2017  | 07:15:00, | NaN |
| 21-Jun-2017  | 07:30:00, | NaN |
| 21-Jun-2017  | 07:45:00, | NaN |
| 21-Jun-2017  | 08:00:00, | NaN |
| 21-Jun-2017  | 08:15:00, | NaN |
| 21-Jun-2017  | 08:30:00, | NaN |
| 21-Jun-2017  | 08:45:00, | NaN |
| 21-Jun-2017  | 09:00:00, | NaN |
| 21-Jun-2017  | 09:15:00, | NaN |
| 21-Jun-2017  | 09:30:00, | NaN |

|              |           |     |
|--------------|-----------|-----|
| 21-Jun-2017  | 09:45:00, | NaN |
| 21-Jun-2017  | 10:00:00, | NaN |
| 21-Jun-2017  | 10:15:00, | NaN |
| 21-Jun-2017  | 10:30:00, | NaN |
| 21-Jun-2017  | 10:45:00, | NaN |
| 21-Jun-2017  | 11:00:00, | NaN |
| 21-Jun-2017  | 11:15:00, | NaN |
| 21-Jun-2017  | 11:30:00, | NaN |
| 21-Jun-2017  | 11:45:00, | NaN |
| 21-Jun-2017  | 12:00:00, | NaN |
| 21-Jun-2017  | 12:15:00, | NaN |
| 21-Jun-2017  | 12:30:00, | NaN |
| 21-Jun-2017  | 12:45:00, | NaN |
| 21-Jun-2017  | 13:00:00, | NaN |
| 21-Jun-2017  | 13:15:00, | NaN |
| 21-Jun-2017  | 13:30:00, | NaN |
| 21-Jun-2017  | 13:45:00, | NaN |
| 21-Jun-2017  | 14:00:00, | NaN |
| 21-Jun-2017  | 14:15:00, | NaN |
| 21-Jun-2017  | 14:30:00, | NaN |
| 21-Jun-2017  | 14:45:00, | NaN |
| 21-Jun-2017  | 15:00:00, | NaN |
| 21-Jun-2017  | 15:15:00, | NaN |
| 21-Jun-2017  | 15:30:00, | NaN |
| 21-Jun-2017  | 15:45:00, | NaN |
| 21-Jun-2017  | 16:00:00, | NaN |
| 21-Jun-2017  | 16:15:00, | NaN |
| 21-Jun-2017  | 16:30:00, | NaN |
| 21-Jun-2017  | 16:45:00, | NaN |
| 21-Jun-2017  | 17:00:00, | NaN |
| 21-Jun-2017  | 17:15:00, | NaN |
| 21-Jun-2017  | 17:30:00, | NaN |
| 21-Jun-2017  | 17:45:00, | NaN |
| 21-Jun-2017  | 18:00:00, | NaN |
| 21-Jun-2017  | 18:15:00, | NaN |
| 21-Jun-2017  | 18:30:00, | NaN |
| 21-Jun-2017  | 18:45:00, | NaN |
| 21-Jun-2017  | 19:00:00, | NaN |
| 21-Jun-2017  | 19:15:00, | NaN |
| 21-Jun-2017  | 19:30:00, | NaN |
| 21-Jun-2017  | 19:45:00, | NaN |
| 21-Jun-2017  | 20:00:00, | NaN |
| 21-Jun-2017  | 20:15:00, | NaN |
| 21-Jun-2017  | 20:30:00, | NaN |
| 21-Jun-2017  | 20:45:00, | NaN |
| 21-Jun-2017  | 21:00:00, | NaN |
| 21-Jun-2017  | 21:15:00, | NaN |
| 21-Jun-2017  | 21:30:00, | NaN |
| 21-Jun-2017  | 21:45:00, | NaN |
| 21-Jun-2017  | 22:00:00, | NaN |
| 21-Jun-2017  | 22:15:00, | NaN |
| 21-Jun-2017  | 22:30:00, | NaN |
| 21-Jun-2017  | 22:45:00, | NaN |
| 21-Jun-2017  | 23:00:00, | NaN |
| 21-Jun-2017  | 23:15:00, | NaN |
| 21-Jun-2017  | 23:30:00, | NaN |
| 21-Jun-2017  | 23:45:00, | NaN |
| 22-Jun-2017, | NaN       |     |
| 22-Jun-2017  | 00:15:00, | NaN |
| 22-Jun-2017  | 00:30:00, | NaN |
| 22-Jun-2017  | 00:45:00, | NaN |
| 22-Jun-2017  | 01:00:00, | NaN |
| 22-Jun-2017  | 01:15:00, | NaN |
| 22-Jun-2017  | 01:30:00, | NaN |



|             |           |          |
|-------------|-----------|----------|
| 22-Jun-2017 | 01:45:00, | NaN      |
| 22-Jun-2017 | 02:00:00, | NaN      |
| 22-Jun-2017 | 02:15:00, | NaN      |
| 22-Jun-2017 | 02:30:00, | NaN      |
| 22-Jun-2017 | 02:45:00, | NaN      |
| 22-Jun-2017 | 03:00:00, | 2.88e-01 |
| 22-Jun-2017 | 03:15:00, | 2.88e-01 |
| 22-Jun-2017 | 03:30:00, | 2.88e-01 |
| 22-Jun-2017 | 03:45:00, | 2.88e-01 |
| 22-Jun-2017 | 04:00:00, | 2.88e-01 |
| 22-Jun-2017 | 04:15:00, | 2.88e-01 |
| 22-Jun-2017 | 04:30:00, | 2.88e-01 |
| 22-Jun-2017 | 04:45:00, | 2.88e-01 |
| 22-Jun-2017 | 05:00:00, | 2.88e-01 |
| 22-Jun-2017 | 05:15:00, | 2.88e-01 |
| 22-Jun-2017 | 05:30:00, | 2.88e-01 |
| 22-Jun-2017 | 05:45:00, | 2.88e-01 |
| 22-Jun-2017 | 06:00:00, | 2.88e-01 |
| 22-Jun-2017 | 06:15:00, | 2.88e-01 |
| 22-Jun-2017 | 06:30:00, | 2.88e-01 |
| 22-Jun-2017 | 06:45:00, | 2.88e-01 |
| 22-Jun-2017 | 07:00:00, | 2.88e-01 |
| 22-Jun-2017 | 07:15:00, | 2.88e-01 |
| 22-Jun-2017 | 07:30:00, | 2.88e-01 |
| 22-Jun-2017 | 07:45:00, | 2.88e-01 |
| 22-Jun-2017 | 08:00:00, | 2.88e-01 |
| 22-Jun-2017 | 08:15:00, | 2.88e-01 |
| 22-Jun-2017 | 08:30:00, | 2.88e-01 |
| 22-Jun-2017 | 08:45:00, | 2.88e-01 |
| 22-Jun-2017 | 09:00:00, | 2.88e-01 |
| 22-Jun-2017 | 09:15:00, | 2.88e-01 |
| 22-Jun-2017 | 09:30:00, | 2.88e-01 |
| 22-Jun-2017 | 09:45:00, | 2.88e-01 |
| 22-Jun-2017 | 10:00:00, | 2.88e-01 |
| 22-Jun-2017 | 10:15:00, | 2.88e-01 |
| 22-Jun-2017 | 10:30:00, | 2.88e-01 |
| 22-Jun-2017 | 10:45:00, | 2.88e-01 |
| 22-Jun-2017 | 11:00:00, | 2.88e-01 |
| 22-Jun-2017 | 11:15:00, | 2.88e-01 |
| 22-Jun-2017 | 11:30:00, | 2.88e-01 |
| 22-Jun-2017 | 11:45:00, | 2.88e-01 |
| 22-Jun-2017 | 12:00:00, | 2.88e-01 |
| 22-Jun-2017 | 12:15:00, | 2.88e-01 |
| 22-Jun-2017 | 12:30:00, | 2.88e-01 |
| 22-Jun-2017 | 12:45:00, | 2.88e-01 |
| 22-Jun-2017 | 13:00:00, | 2.88e-01 |
| 22-Jun-2017 | 13:15:00, | 2.88e-01 |
| 22-Jun-2017 | 13:30:00, | 2.88e-01 |
| 22-Jun-2017 | 13:45:00, | 2.88e-01 |
| 22-Jun-2017 | 14:00:00, | 2.88e-01 |
| 22-Jun-2017 | 14:15:00, | 2.88e-01 |
| 22-Jun-2017 | 14:30:00, | 2.88e-01 |
| 22-Jun-2017 | 14:45:00, | 2.88e-01 |
| 22-Jun-2017 | 15:00:00, | 2.88e-01 |
| 22-Jun-2017 | 15:15:00, | 2.88e-01 |
| 22-Jun-2017 | 15:30:00, | 2.88e-01 |
| 22-Jun-2017 | 15:45:00, | 2.88e-01 |
| 22-Jun-2017 | 16:00:00, | 2.88e-01 |
| 22-Jun-2017 | 16:15:00, | 2.88e-01 |
| 22-Jun-2017 | 16:30:00, | 2.88e-01 |
| 22-Jun-2017 | 16:45:00, | 2.88e-01 |
| 22-Jun-2017 | 17:00:00, | 2.88e-01 |
| 22-Jun-2017 | 17:15:00, | 2.88e-01 |
| 22-Jun-2017 | 17:30:00, | 2.88e-01 |

22-Jun-2017 17:45:00, 2.88e-01  
22-Jun-2017 18:00:00, 2.88e-01  
22-Jun-2017 18:15:00, 2.88e-01  
22-Jun-2017 18:30:00, 2.88e-01  
22-Jun-2017 18:45:00, 2.88e-01  
22-Jun-2017 19:00:00, 2.88e-01  
22-Jun-2017 19:15:00, 2.87e-01  
22-Jun-2017 19:30:00, 2.87e-01  
22-Jun-2017 19:45:00, 2.87e-01  
22-Jun-2017 20:00:00, 2.87e-01  
22-Jun-2017 20:15:00, 2.87e-01  
22-Jun-2017 20:30:00, 2.87e-01  
22-Jun-2017 20:45:00, 2.87e-01  
22-Jun-2017 21:00:00, 2.87e-01  
22-Jun-2017 21:15:00, 2.88e-01  
22-Jun-2017 21:30:00, 2.88e-01  
22-Jun-2017 21:45:00, 2.88e-01  
22-Jun-2017 22:00:00, 2.88e-01  
22-Jun-2017 22:15:00, 2.88e-01  
22-Jun-2017 22:30:00, 2.88e-01  
22-Jun-2017 22:45:00, 2.88e-01  
22-Jun-2017 23:00:00, 2.88e-01  
22-Jun-2017 23:15:00, 2.88e-01  
22-Jun-2017 23:30:00, 2.88e-01  
22-Jun-2017 23:45:00, 2.88e-01  
23-Jun-2017, 2.88e-01  
23-Jun-2017 00:15:00, 2.88e-01  
23-Jun-2017 00:30:00, 2.88e-01  
23-Jun-2017 00:45:00, 2.88e-01  
23-Jun-2017 01:00:00, 2.88e-01  
23-Jun-2017 01:15:00, 2.88e-01  
23-Jun-2017 01:30:00, 2.88e-01  
23-Jun-2017 01:45:00, 2.88e-01  
23-Jun-2017 02:00:00, 2.88e-01  
23-Jun-2017 02:15:00, 2.88e-01  
23-Jun-2017 02:30:00, 2.88e-01  
23-Jun-2017 02:45:00, 2.88e-01  
23-Jun-2017 03:00:00, 2.88e-01  
23-Jun-2017 03:15:00, 2.88e-01  
23-Jun-2017 03:30:00, 2.88e-01  
23-Jun-2017 03:45:00, 2.88e-01  
23-Jun-2017 04:00:00, 2.88e-01  
23-Jun-2017 04:15:00, 2.88e-01  
23-Jun-2017 04:30:00, 2.87e-01  
23-Jun-2017 04:45:00, 2.87e-01  
23-Jun-2017 05:00:00, 2.87e-01  
23-Jun-2017 05:15:00, 2.87e-01  
23-Jun-2017 05:30:00, 2.87e-01  
23-Jun-2017 05:45:00, 2.87e-01  
23-Jun-2017 06:00:00, 2.87e-01  
23-Jun-2017 06:15:00, 2.87e-01  
23-Jun-2017 06:30:00, 2.87e-01  
23-Jun-2017 06:45:00, 2.87e-01  
23-Jun-2017 07:00:00, 2.87e-01  
23-Jun-2017 07:15:00, 2.87e-01  
23-Jun-2017 07:30:00, 2.87e-01  
23-Jun-2017 07:45:00, 2.87e-01  
23-Jun-2017 08:00:00, 2.87e-01  
23-Jun-2017 08:15:00, 2.87e-01  
23-Jun-2017 08:30:00, 2.87e-01  
23-Jun-2017 08:45:00, 2.87e-01  
23-Jun-2017 09:00:00, 2.87e-01  
23-Jun-2017 09:15:00, 2.87e-01  
23-Jun-2017 09:30:00, 2.87e-01

23-Jun-2017 09:45:00, 2.87e-01  
23-Jun-2017 10:00:00, 2.87e-01  
23-Jun-2017 10:15:00, 2.87e-01  
23-Jun-2017 10:30:00, 2.87e-01  
23-Jun-2017 10:45:00, 2.87e-01  
23-Jun-2017 11:00:00, 2.87e-01  
23-Jun-2017 11:15:00, 2.87e-01  
23-Jun-2017 11:30:00, 2.87e-01  
23-Jun-2017 11:45:00, 2.87e-01  
23-Jun-2017 12:00:00, 2.87e-01  
23-Jun-2017 12:15:00, 2.87e-01  
23-Jun-2017 12:30:00, 2.87e-01  
23-Jun-2017 12:45:00, 2.87e-01  
23-Jun-2017 13:00:00, 2.87e-01  
23-Jun-2017 13:15:00, 2.87e-01  
23-Jun-2017 13:30:00, 2.87e-01  
23-Jun-2017 13:45:00, 2.87e-01  
23-Jun-2017 14:00:00, 2.86e-01  
23-Jun-2017 14:15:00, 2.86e-01  
23-Jun-2017 14:30:00, 2.86e-01  
23-Jun-2017 14:45:00, 2.86e-01  
23-Jun-2017 15:00:00, 2.86e-01  
23-Jun-2017 15:15:00, 2.86e-01  
23-Jun-2017 15:30:00, 2.86e-01  
23-Jun-2017 15:45:00, 2.86e-01  
23-Jun-2017 16:00:00, 2.86e-01  
23-Jun-2017 16:15:00, 2.86e-01  
23-Jun-2017 16:30:00, 2.86e-01  
23-Jun-2017 16:45:00, 2.86e-01  
23-Jun-2017 17:00:00, 2.86e-01  
23-Jun-2017 17:15:00, 2.86e-01  
23-Jun-2017 17:30:00, 2.86e-01  
23-Jun-2017 17:45:00, 2.86e-01  
23-Jun-2017 18:00:00, 2.86e-01  
23-Jun-2017 18:15:00, 2.86e-01  
23-Jun-2017 18:30:00, 2.86e-01  
23-Jun-2017 18:45:00, 2.86e-01  
23-Jun-2017 19:00:00, 2.86e-01  
23-Jun-2017 19:15:00, 2.86e-01  
23-Jun-2017 19:30:00, 2.86e-01  
23-Jun-2017 19:45:00, 2.86e-01  
23-Jun-2017 20:00:00, 2.86e-01  
23-Jun-2017 20:15:00, 2.86e-01  
23-Jun-2017 20:30:00, 2.86e-01  
23-Jun-2017 20:45:00, 2.85e-01  
23-Jun-2017 21:00:00, 2.85e-01  
23-Jun-2017 21:15:00, 2.85e-01  
23-Jun-2017 21:30:00, 2.85e-01  
23-Jun-2017 21:45:00, 2.85e-01  
23-Jun-2017 22:00:00, 2.85e-01  
23-Jun-2017 22:15:00, 2.85e-01  
23-Jun-2017 22:30:00, 2.85e-01  
23-Jun-2017 22:45:00, 2.85e-01  
23-Jun-2017 23:00:00, 2.85e-01  
23-Jun-2017 23:15:00, 2.85e-01  
23-Jun-2017 23:30:00, 2.85e-01  
23-Jun-2017 23:45:00, 2.85e-01  
24-Jun-2017, 2.85e-01  
24-Jun-2017 00:15:00, 2.85e-01  
24-Jun-2017 00:30:00, 2.85e-01  
24-Jun-2017 00:45:00, 2.85e-01  
24-Jun-2017 01:00:00, 2.85e-01  
24-Jun-2017 01:15:00, 2.86e-01  
24-Jun-2017 01:30:00, 2.85e-01

|             |           |          |
|-------------|-----------|----------|
| 24-Jun-2017 | 01:45:00, | 2.85e-01 |
| 24-Jun-2017 | 02:00:00, | 2.85e-01 |
| 24-Jun-2017 | 02:15:00, | 2.85e-01 |
| 24-Jun-2017 | 02:30:00, | 2.85e-01 |
| 24-Jun-2017 | 02:45:00, | 2.85e-01 |
| 24-Jun-2017 | 03:00:00, | 2.86e-01 |
| 24-Jun-2017 | 03:15:00, | 2.86e-01 |
| 24-Jun-2017 | 03:30:00, | 2.85e-01 |
| 24-Jun-2017 | 03:45:00, | 2.85e-01 |
| 24-Jun-2017 | 04:00:00, | 2.85e-01 |
| 24-Jun-2017 | 04:15:00, | 2.85e-01 |
| 24-Jun-2017 | 04:30:00, | 2.85e-01 |
| 24-Jun-2017 | 04:45:00, | 2.85e-01 |
| 24-Jun-2017 | 05:00:00, | 2.85e-01 |
| 24-Jun-2017 | 05:15:00, | 2.85e-01 |
| 24-Jun-2017 | 05:30:00, | 2.85e-01 |
| 24-Jun-2017 | 05:45:00, | 2.85e-01 |
| 24-Jun-2017 | 06:00:00, | 2.85e-01 |
| 24-Jun-2017 | 06:15:00, | 2.85e-01 |
| 24-Jun-2017 | 06:30:00, | 2.85e-01 |
| 24-Jun-2017 | 06:45:00, | 2.85e-01 |
| 24-Jun-2017 | 07:00:00, | 2.85e-01 |
| 24-Jun-2017 | 07:15:00, | 2.85e-01 |
| 24-Jun-2017 | 07:30:00, | 2.85e-01 |
| 24-Jun-2017 | 07:45:00, | 2.85e-01 |
| 24-Jun-2017 | 08:00:00, | 2.85e-01 |
| 24-Jun-2017 | 08:15:00, | 2.85e-01 |
| 24-Jun-2017 | 08:30:00, | 2.85e-01 |
| 24-Jun-2017 | 08:45:00, | 2.85e-01 |
| 24-Jun-2017 | 09:00:00, | 2.85e-01 |
| 24-Jun-2017 | 09:15:00, | 2.85e-01 |
| 24-Jun-2017 | 09:30:00, | 2.85e-01 |
| 24-Jun-2017 | 09:45:00, | 2.85e-01 |
| 24-Jun-2017 | 10:00:00, | 2.85e-01 |
| 24-Jun-2017 | 10:15:00, | 2.85e-01 |
| 24-Jun-2017 | 10:30:00, | 2.85e-01 |
| 24-Jun-2017 | 10:45:00, | 2.85e-01 |
| 24-Jun-2017 | 11:00:00, | 2.84e-01 |
| 24-Jun-2017 | 11:15:00, | 2.84e-01 |
| 24-Jun-2017 | 11:30:00, | 2.84e-01 |
| 24-Jun-2017 | 11:45:00, | 2.84e-01 |
| 24-Jun-2017 | 12:00:00, | 2.84e-01 |
| 24-Jun-2017 | 12:15:00, | 2.84e-01 |
| 24-Jun-2017 | 12:30:00, | 2.84e-01 |
| 24-Jun-2017 | 12:45:00, | 2.84e-01 |
| 24-Jun-2017 | 13:00:00, | 2.84e-01 |
| 24-Jun-2017 | 13:15:00, | 2.84e-01 |
| 24-Jun-2017 | 13:30:00, | 2.84e-01 |
| 24-Jun-2017 | 13:45:00, | 2.84e-01 |
| 24-Jun-2017 | 14:00:00, | 2.84e-01 |
| 24-Jun-2017 | 14:15:00, | 2.84e-01 |
| 24-Jun-2017 | 14:30:00, | 2.84e-01 |
| 24-Jun-2017 | 14:45:00, | 2.84e-01 |
| 24-Jun-2017 | 15:00:00, | 2.84e-01 |
| 24-Jun-2017 | 15:15:00, | 2.84e-01 |
| 24-Jun-2017 | 15:30:00, | 2.84e-01 |
| 24-Jun-2017 | 15:45:00, | 2.84e-01 |
| 24-Jun-2017 | 16:00:00, | 2.84e-01 |
| 24-Jun-2017 | 16:15:00, | 2.84e-01 |
| 24-Jun-2017 | 16:30:00, | 2.84e-01 |
| 24-Jun-2017 | 16:45:00, | 2.84e-01 |
| 24-Jun-2017 | 17:00:00, | 2.84e-01 |
| 24-Jun-2017 | 17:15:00, | 2.84e-01 |
| 24-Jun-2017 | 17:30:00, | 2.84e-01 |

24-Jun-2017 17:45:00, 2.84e-01  
24-Jun-2017 18:00:00, 2.83e-01  
24-Jun-2017 18:15:00, 2.84e-01  
24-Jun-2017 18:30:00, 2.83e-01  
24-Jun-2017 18:45:00, 2.83e-01  
24-Jun-2017 19:00:00, 2.83e-01  
24-Jun-2017 19:15:00, 2.84e-01  
24-Jun-2017 19:30:00, 2.83e-01  
24-Jun-2017 19:45:00, 2.84e-01  
24-Jun-2017 20:00:00, 2.83e-01  
24-Jun-2017 20:15:00, 2.84e-01  
24-Jun-2017 20:30:00, 2.84e-01  
24-Jun-2017 20:45:00, 2.84e-01  
24-Jun-2017 21:00:00, 2.84e-01  
24-Jun-2017 21:15:00, 2.84e-01  
24-Jun-2017 21:30:00, 2.84e-01  
24-Jun-2017 21:45:00, 2.84e-01  
24-Jun-2017 22:00:00, 2.84e-01  
24-Jun-2017 22:15:00, 2.84e-01  
24-Jun-2017 22:30:00, 2.84e-01  
24-Jun-2017 22:45:00, 2.84e-01  
24-Jun-2017 23:00:00, 2.84e-01  
24-Jun-2017 23:15:00, 2.84e-01  
24-Jun-2017 23:30:00, 2.84e-01  
24-Jun-2017 23:45:00, 2.84e-01  
25-Jun-2017, 2.84e-01  
25-Jun-2017 00:15:00, 2.84e-01  
25-Jun-2017 00:30:00, 2.84e-01  
25-Jun-2017 00:45:00, 2.84e-01  
25-Jun-2017 01:00:00, 2.84e-01  
25-Jun-2017 01:15:00, 2.84e-01  
25-Jun-2017 01:30:00, 2.84e-01  
25-Jun-2017 01:45:00, 2.84e-01  
25-Jun-2017 02:00:00, 2.84e-01  
25-Jun-2017 02:15:00, 2.84e-01  
25-Jun-2017 02:30:00, 2.84e-01  
25-Jun-2017 02:45:00, 2.84e-01  
25-Jun-2017 03:00:00, 2.84e-01  
25-Jun-2017 03:15:00, 2.84e-01  
25-Jun-2017 03:30:00, 2.84e-01  
25-Jun-2017 03:45:00, 2.84e-01  
25-Jun-2017 04:00:00, 2.84e-01  
25-Jun-2017 04:15:00, 2.84e-01  
25-Jun-2017 04:30:00, 2.84e-01  
25-Jun-2017 04:45:00, 2.84e-01  
25-Jun-2017 05:00:00, 2.84e-01  
25-Jun-2017 05:15:00, 2.84e-01  
25-Jun-2017 05:30:00, 2.83e-01  
25-Jun-2017 05:45:00, 2.83e-01  
25-Jun-2017 06:00:00, 2.83e-01  
25-Jun-2017 06:15:00, 2.83e-01  
25-Jun-2017 06:30:00, 2.83e-01  
25-Jun-2017 06:45:00, 2.83e-01  
25-Jun-2017 07:00:00, 2.83e-01  
25-Jun-2017 07:15:00, 2.83e-01  
25-Jun-2017 07:30:00, 2.83e-01  
25-Jun-2017 07:45:00, 2.83e-01  
25-Jun-2017 08:00:00, 2.83e-01  
25-Jun-2017 08:15:00, 2.83e-01  
25-Jun-2017 08:30:00, 2.83e-01  
25-Jun-2017 08:45:00, 2.83e-01  
25-Jun-2017 09:00:00, 2.83e-01  
25-Jun-2017 09:15:00, 2.83e-01  
25-Jun-2017 09:30:00, 2.83e-01

25-Jun-2017 09:45:00, 2.83e-01  
25-Jun-2017 10:00:00, 2.83e-01  
25-Jun-2017 10:15:00, 2.83e-01  
25-Jun-2017 10:30:00, 2.83e-01  
25-Jun-2017 10:45:00, 2.83e-01  
25-Jun-2017 11:00:00, 2.83e-01  
25-Jun-2017 11:15:00, 2.83e-01  
25-Jun-2017 11:30:00, 2.83e-01  
25-Jun-2017 11:45:00, 2.82e-01  
25-Jun-2017 12:00:00, 2.82e-01  
25-Jun-2017 12:15:00, 2.83e-01  
25-Jun-2017 12:30:00, 2.83e-01  
25-Jun-2017 12:45:00, 2.83e-01  
25-Jun-2017 13:00:00, 2.82e-01  
25-Jun-2017 13:15:00, 2.82e-01  
25-Jun-2017 13:30:00, 2.82e-01  
25-Jun-2017 13:45:00, 2.82e-01  
25-Jun-2017 14:00:00, 2.82e-01  
25-Jun-2017 14:15:00, 2.82e-01  
25-Jun-2017 14:30:00, 2.82e-01  
25-Jun-2017 14:45:00, 2.81e-01  
25-Jun-2017 15:00:00, 2.81e-01  
25-Jun-2017 15:15:00, 2.81e-01  
25-Jun-2017 15:30:00, 2.81e-01  
25-Jun-2017 15:45:00, 2.81e-01  
25-Jun-2017 16:00:00, 2.81e-01  
25-Jun-2017 16:15:00, 2.81e-01  
25-Jun-2017 16:30:00, 2.81e-01  
25-Jun-2017 16:45:00, 2.81e-01  
25-Jun-2017 17:00:00, 2.81e-01  
25-Jun-2017 17:15:00, 2.81e-01  
25-Jun-2017 17:30:00, 2.80e-01  
25-Jun-2017 17:45:00, 2.80e-01  
25-Jun-2017 18:00:00, 2.80e-01  
25-Jun-2017 18:15:00, 2.80e-01  
25-Jun-2017 18:30:00, 2.80e-01  
25-Jun-2017 18:45:00, 2.80e-01  
25-Jun-2017 19:00:00, 2.80e-01  
25-Jun-2017 19:15:00, 2.80e-01  
25-Jun-2017 19:30:00, 2.80e-01  
25-Jun-2017 19:45:00, 2.80e-01  
25-Jun-2017 20:00:00, 2.80e-01  
25-Jun-2017 20:15:00, 2.80e-01  
25-Jun-2017 20:30:00, 2.80e-01  
25-Jun-2017 20:45:00, 2.80e-01  
25-Jun-2017 21:00:00, 2.80e-01  
25-Jun-2017 21:15:00, 2.80e-01  
25-Jun-2017 21:30:00, 2.80e-01  
25-Jun-2017 21:45:00, 2.80e-01  
25-Jun-2017 22:00:00, 2.80e-01  
25-Jun-2017 22:15:00, 2.80e-01  
25-Jun-2017 22:30:00, 2.80e-01  
25-Jun-2017 22:45:00, 2.80e-01  
25-Jun-2017 23:00:00, 2.80e-01  
25-Jun-2017 23:15:00, 2.80e-01  
25-Jun-2017 23:30:00, 2.80e-01  
25-Jun-2017 23:45:00, 2.80e-01  
26-Jun-2017, 2.80e-01  
26-Jun-2017 00:15:00, 2.80e-01  
26-Jun-2017 00:30:00, 2.80e-01  
26-Jun-2017 00:45:00, 2.80e-01  
26-Jun-2017 01:00:00, 2.80e-01  
26-Jun-2017 01:15:00, 2.80e-01  
26-Jun-2017 01:30:00, 2.80e-01

|             |           |          |
|-------------|-----------|----------|
| 26-Jun-2017 | 01:45:00, | 2.80e-01 |
| 26-Jun-2017 | 02:00:00, | 2.80e-01 |
| 26-Jun-2017 | 02:15:00, | 2.80e-01 |
| 26-Jun-2017 | 02:30:00, | 2.80e-01 |
| 26-Jun-2017 | 02:45:00, | 2.80e-01 |
| 26-Jun-2017 | 03:00:00, | 2.80e-01 |
| 26-Jun-2017 | 03:15:00, | 2.80e-01 |
| 26-Jun-2017 | 03:30:00, | 2.80e-01 |
| 26-Jun-2017 | 03:45:00, | 2.80e-01 |
| 26-Jun-2017 | 04:00:00, | 2.80e-01 |
| 26-Jun-2017 | 04:15:00, | 2.80e-01 |
| 26-Jun-2017 | 04:30:00, | 2.80e-01 |
| 26-Jun-2017 | 04:45:00, | 2.80e-01 |
| 26-Jun-2017 | 05:00:00, | 2.79e-01 |
| 26-Jun-2017 | 05:15:00, | 2.79e-01 |
| 26-Jun-2017 | 05:30:00, | 2.79e-01 |
| 26-Jun-2017 | 05:45:00, | 2.79e-01 |
| 26-Jun-2017 | 06:00:00, | 2.79e-01 |
| 26-Jun-2017 | 06:15:00, | 2.79e-01 |
| 26-Jun-2017 | 06:30:00, | 2.79e-01 |
| 26-Jun-2017 | 06:45:00, | 2.79e-01 |
| 26-Jun-2017 | 07:00:00, | 2.79e-01 |
| 26-Jun-2017 | 07:15:00, | 2.79e-01 |
| 26-Jun-2017 | 07:30:00, | 2.79e-01 |
| 26-Jun-2017 | 07:45:00, | 2.79e-01 |
| 26-Jun-2017 | 08:00:00, | 2.79e-01 |
| 26-Jun-2017 | 08:15:00, | 2.79e-01 |
| 26-Jun-2017 | 08:30:00, | 2.79e-01 |
| 26-Jun-2017 | 08:45:00, | 2.79e-01 |
| 26-Jun-2017 | 09:00:00, | 2.79e-01 |
| 26-Jun-2017 | 09:15:00, | 2.79e-01 |
| 26-Jun-2017 | 09:30:00, | 2.79e-01 |
| 26-Jun-2017 | 09:45:00, | 2.79e-01 |
| 26-Jun-2017 | 10:00:00, | 2.78e-01 |
| 26-Jun-2017 | 10:15:00, | 2.78e-01 |
| 26-Jun-2017 | 10:30:00, | 2.78e-01 |
| 26-Jun-2017 | 10:45:00, | 2.78e-01 |
| 26-Jun-2017 | 11:00:00, | 2.78e-01 |
| 26-Jun-2017 | 11:15:00, | 2.78e-01 |
| 26-Jun-2017 | 11:30:00, | 2.78e-01 |
| 26-Jun-2017 | 11:45:00, | 2.78e-01 |
| 26-Jun-2017 | 12:00:00, | 2.78e-01 |
| 26-Jun-2017 | 12:15:00, | 2.78e-01 |
| 26-Jun-2017 | 12:30:00, | 2.78e-01 |
| 26-Jun-2017 | 12:45:00, | 2.78e-01 |
| 26-Jun-2017 | 13:00:00, | 2.78e-01 |
| 26-Jun-2017 | 13:15:00, | 2.78e-01 |
| 26-Jun-2017 | 13:30:00, | 2.78e-01 |
| 26-Jun-2017 | 13:45:00, | 2.78e-01 |
| 26-Jun-2017 | 14:00:00, | 2.78e-01 |
| 26-Jun-2017 | 14:15:00, | 2.78e-01 |
| 26-Jun-2017 | 14:30:00, | 2.78e-01 |
| 26-Jun-2017 | 14:45:00, | 2.78e-01 |
| 26-Jun-2017 | 15:00:00, | 2.77e-01 |
| 26-Jun-2017 | 15:15:00, | 2.77e-01 |
| 26-Jun-2017 | 15:30:00, | 2.78e-01 |
| 26-Jun-2017 | 15:45:00, | 2.78e-01 |
| 26-Jun-2017 | 16:00:00, | 2.78e-01 |
| 26-Jun-2017 | 16:15:00, | 2.77e-01 |
| 26-Jun-2017 | 16:30:00, | 2.77e-01 |
| 26-Jun-2017 | 16:45:00, | 2.77e-01 |
| 26-Jun-2017 | 17:00:00, | 2.78e-01 |
| 26-Jun-2017 | 17:15:00, | 2.78e-01 |
| 26-Jun-2017 | 17:30:00, | 2.78e-01 |

26-Jun-2017 17:45:00, 2.78e-01  
26-Jun-2017 18:00:00, 2.78e-01  
26-Jun-2017 18:15:00, 2.78e-01  
26-Jun-2017 18:30:00, 2.78e-01  
26-Jun-2017 18:45:00, 2.78e-01  
26-Jun-2017 19:00:00, 2.78e-01  
26-Jun-2017 19:15:00, 2.78e-01  
26-Jun-2017 19:30:00, 2.78e-01  
26-Jun-2017 19:45:00, 2.78e-01  
26-Jun-2017 20:00:00, 2.78e-01  
26-Jun-2017 20:15:00, 2.78e-01  
26-Jun-2017 20:30:00, 2.78e-01  
26-Jun-2017 20:45:00, 2.78e-01  
26-Jun-2017 21:00:00, 2.78e-01  
26-Jun-2017 21:15:00, 2.78e-01  
26-Jun-2017 21:30:00, 2.78e-01  
26-Jun-2017 21:45:00, 2.78e-01  
26-Jun-2017 22:00:00, 2.78e-01  
26-Jun-2017 22:15:00, 2.78e-01  
26-Jun-2017 22:30:00, 2.78e-01  
26-Jun-2017 22:45:00, 2.78e-01  
26-Jun-2017 23:00:00, 2.78e-01  
26-Jun-2017 23:15:00, 2.78e-01  
26-Jun-2017 23:30:00, 2.78e-01  
26-Jun-2017 23:45:00, 2.78e-01  
27-Jun-2017, 2.78e-01  
27-Jun-2017 00:15:00, 2.78e-01  
27-Jun-2017 00:30:00, 2.78e-01  
27-Jun-2017 00:45:00, 2.78e-01  
27-Jun-2017 01:00:00, 2.77e-01  
27-Jun-2017 01:15:00, 2.77e-01  
27-Jun-2017 01:30:00, 2.76e-01  
27-Jun-2017 01:45:00, 2.76e-01  
27-Jun-2017 02:00:00, 2.76e-01  
27-Jun-2017 02:15:00, 2.76e-01  
27-Jun-2017 02:30:00, 2.76e-01  
27-Jun-2017 02:45:00, 2.76e-01  
27-Jun-2017 03:00:00, 2.75e-01  
27-Jun-2017 03:15:00, 2.75e-01  
27-Jun-2017 03:30:00, 2.75e-01  
27-Jun-2017 03:45:00, 2.75e-01  
27-Jun-2017 04:00:00, 2.75e-01  
27-Jun-2017 04:15:00, 2.76e-01  
27-Jun-2017 04:30:00, 2.75e-01  
27-Jun-2017 04:45:00, 2.76e-01  
27-Jun-2017 05:00:00, 2.76e-01  
27-Jun-2017 05:15:00, 2.76e-01  
27-Jun-2017 05:30:00, 2.75e-01  
27-Jun-2017 05:45:00, 2.76e-01  
27-Jun-2017 06:00:00, 2.76e-01  
27-Jun-2017 06:15:00, 2.76e-01  
27-Jun-2017 06:30:00, 2.76e-01  
27-Jun-2017 06:45:00, 2.75e-01  
27-Jun-2017 07:00:00, 2.75e-01  
27-Jun-2017 07:15:00, 2.75e-01  
27-Jun-2017 07:30:00, 2.75e-01  
27-Jun-2017 07:45:00, 2.75e-01  
27-Jun-2017 08:00:00, 2.75e-01  
27-Jun-2017 08:15:00, 2.75e-01  
27-Jun-2017 08:30:00, 2.75e-01  
27-Jun-2017 08:45:00, 2.75e-01  
27-Jun-2017 09:00:00, 2.75e-01  
27-Jun-2017 09:15:00, 2.75e-01  
27-Jun-2017 09:30:00, 2.75e-01



27-Jun-2017 09:45:00, 2.75e-01  
27-Jun-2017 10:00:00, 2.75e-01  
27-Jun-2017 10:15:00, 2.75e-01  
27-Jun-2017 10:30:00, 2.75e-01  
27-Jun-2017 10:45:00, 2.75e-01  
27-Jun-2017 11:00:00, 2.75e-01  
27-Jun-2017 11:15:00, 2.75e-01  
27-Jun-2017 11:30:00, 2.75e-01  
27-Jun-2017 11:45:00, 2.75e-01  
27-Jun-2017 12:00:00, 2.75e-01  
27-Jun-2017 12:15:00, 2.75e-01  
27-Jun-2017 12:30:00, 2.75e-01  
27-Jun-2017 12:45:00, 2.75e-01  
27-Jun-2017 13:00:00, 2.74e-01  
27-Jun-2017 13:15:00, 2.74e-01  
27-Jun-2017 13:30:00, 2.74e-01  
27-Jun-2017 13:45:00, 2.74e-01  
27-Jun-2017 14:00:00, 2.74e-01  
27-Jun-2017 14:15:00, 2.74e-01  
27-Jun-2017 14:30:00, 2.74e-01  
27-Jun-2017 14:45:00, 2.74e-01  
27-Jun-2017 15:00:00, 2.74e-01  
27-Jun-2017 15:15:00, 2.74e-01  
27-Jun-2017 15:30:00, 2.74e-01  
27-Jun-2017 15:45:00, 2.74e-01  
27-Jun-2017 16:00:00, 2.74e-01  
27-Jun-2017 16:15:00, 2.74e-01  
27-Jun-2017 16:30:00, 2.74e-01  
27-Jun-2017 16:45:00, 2.74e-01  
27-Jun-2017 17:00:00, 2.74e-01  
27-Jun-2017 17:15:00, 2.74e-01  
27-Jun-2017 17:30:00, 2.74e-01  
27-Jun-2017 17:45:00, 2.74e-01  
27-Jun-2017 18:00:00, 2.74e-01  
27-Jun-2017 18:15:00, 2.74e-01  
27-Jun-2017 18:30:00, 2.74e-01  
27-Jun-2017 18:45:00, 2.74e-01  
27-Jun-2017 19:00:00, 2.74e-01  
27-Jun-2017 19:15:00, 2.74e-01  
27-Jun-2017 19:30:00, 2.74e-01  
27-Jun-2017 19:45:00, 2.74e-01  
27-Jun-2017 20:00:00, 2.74e-01  
27-Jun-2017 20:15:00, 2.74e-01  
27-Jun-2017 20:30:00, 2.74e-01  
27-Jun-2017 20:45:00, 2.74e-01  
27-Jun-2017 21:00:00, 2.73e-01  
27-Jun-2017 21:15:00, 2.73e-01  
27-Jun-2017 21:30:00, 2.73e-01  
27-Jun-2017 21:45:00, 2.73e-01  
27-Jun-2017 22:00:00, 2.73e-01  
27-Jun-2017 22:15:00, 2.74e-01  
27-Jun-2017 22:30:00, 2.73e-01  
27-Jun-2017 22:45:00, 2.73e-01  
27-Jun-2017 23:00:00, 2.73e-01  
27-Jun-2017 23:15:00, 2.73e-01  
27-Jun-2017 23:30:00, 2.73e-01  
27-Jun-2017 23:45:00, 2.73e-01  
28-Jun-2017, 2.73e-01  
28-Jun-2017 00:15:00, 2.73e-01  
28-Jun-2017 00:30:00, 2.73e-01  
28-Jun-2017 00:45:00, 2.73e-01  
28-Jun-2017 01:00:00, 2.73e-01  
28-Jun-2017 01:15:00, 2.73e-01  
28-Jun-2017 01:30:00, 2.73e-01

28-Jun-2017 01:45:00, 2.73e-01  
28-Jun-2017 02:00:00, 2.73e-01  
28-Jun-2017 02:15:00, 2.73e-01  
28-Jun-2017 02:30:00, 2.73e-01  
28-Jun-2017 02:45:00, 2.73e-01  
28-Jun-2017 03:00:00, 2.73e-01  
28-Jun-2017 03:15:00, 2.73e-01  
28-Jun-2017 03:30:00, 2.73e-01  
28-Jun-2017 03:45:00, 2.73e-01  
28-Jun-2017 04:00:00, 2.73e-01  
28-Jun-2017 04:15:00, 2.73e-01  
28-Jun-2017 04:30:00, 2.73e-01  
28-Jun-2017 04:45:00, 2.73e-01  
28-Jun-2017 05:00:00, 2.72e-01  
28-Jun-2017 05:15:00, 2.73e-01  
28-Jun-2017 05:30:00, 2.73e-01  
28-Jun-2017 05:45:00, 2.73e-01  
28-Jun-2017 06:00:00, 2.73e-01  
28-Jun-2017 06:15:00, 2.73e-01  
28-Jun-2017 06:30:00, 2.72e-01  
28-Jun-2017 06:45:00, 2.72e-01  
28-Jun-2017 07:00:00, 2.72e-01  
28-Jun-2017 07:15:00, 2.72e-01  
28-Jun-2017 07:30:00, 2.72e-01  
28-Jun-2017 07:45:00, 2.72e-01  
28-Jun-2017 08:00:00, 2.72e-01  
28-Jun-2017 08:15:00, 2.72e-01  
28-Jun-2017 08:30:00, 2.72e-01  
28-Jun-2017 08:45:00, 2.72e-01  
28-Jun-2017 09:00:00, 2.72e-01  
28-Jun-2017 09:15:00, 2.72e-01  
28-Jun-2017 09:30:00, 2.72e-01  
28-Jun-2017 09:45:00, 2.72e-01  
28-Jun-2017 10:00:00, 2.72e-01  
28-Jun-2017 10:15:00, 2.72e-01  
28-Jun-2017 10:30:00, 2.72e-01  
28-Jun-2017 10:45:00, 2.72e-01  
28-Jun-2017 11:00:00, 2.72e-01  
28-Jun-2017 11:15:00, 2.72e-01  
28-Jun-2017 11:30:00, 2.71e-01  
28-Jun-2017 11:45:00, 2.71e-01  
28-Jun-2017 12:00:00, 2.71e-01  
28-Jun-2017 12:15:00, 2.71e-01  
28-Jun-2017 12:30:00, 2.71e-01  
28-Jun-2017 12:45:00, 2.71e-01  
28-Jun-2017 13:00:00, 2.71e-01  
28-Jun-2017 13:15:00, 2.71e-01  
28-Jun-2017 13:30:00, 2.71e-01  
28-Jun-2017 13:45:00, 2.71e-01  
28-Jun-2017 14:00:00, 2.71e-01  
28-Jun-2017 14:15:00, 2.71e-01  
28-Jun-2017 14:30:00, 2.71e-01  
28-Jun-2017 14:45:00, 2.71e-01  
28-Jun-2017 15:00:00, 2.71e-01  
28-Jun-2017 15:15:00, 2.70e-01  
28-Jun-2017 15:30:00, 2.70e-01  
28-Jun-2017 15:45:00, 2.70e-01  
28-Jun-2017 16:00:00, 2.70e-01  
28-Jun-2017 16:15:00, 2.70e-01  
28-Jun-2017 16:30:00, 2.70e-01  
28-Jun-2017 16:45:00, 2.70e-01  
28-Jun-2017 17:00:00, 2.70e-01  
28-Jun-2017 17:15:00, 2.70e-01  
28-Jun-2017 17:30:00, 2.70e-01

28-Jun-2017 17:45:00, 2.70e-01  
28-Jun-2017 18:00:00, 2.70e-01  
28-Jun-2017 18:15:00, 2.70e-01  
28-Jun-2017 18:30:00, 2.70e-01  
28-Jun-2017 18:45:00, 2.70e-01  
28-Jun-2017 19:00:00, 2.70e-01  
28-Jun-2017 19:15:00, 2.70e-01  
28-Jun-2017 19:30:00, 2.69e-01  
28-Jun-2017 19:45:00, 2.69e-01  
28-Jun-2017 20:00:00, 2.69e-01  
28-Jun-2017 20:15:00, 2.69e-01  
28-Jun-2017 20:30:00, 2.69e-01  
28-Jun-2017 20:45:00, 2.69e-01  
28-Jun-2017 21:00:00, 2.69e-01  
28-Jun-2017 21:15:00, 2.69e-01  
28-Jun-2017 21:30:00, 2.69e-01  
28-Jun-2017 21:45:00, 2.69e-01  
28-Jun-2017 22:00:00, 2.69e-01  
28-Jun-2017 22:15:00, 2.69e-01  
28-Jun-2017 22:30:00, 2.69e-01  
28-Jun-2017 22:45:00, 2.69e-01  
28-Jun-2017 23:00:00, 2.69e-01  
28-Jun-2017 23:15:00, 2.69e-01  
28-Jun-2017 23:30:00, 2.69e-01  
28-Jun-2017 23:45:00, 2.69e-01  
29-Jun-2017, 2.69e-01  
29-Jun-2017 00:15:00, 2.69e-01  
29-Jun-2017 00:30:00, 2.69e-01  
29-Jun-2017 00:45:00, 2.69e-01  
29-Jun-2017 01:00:00, 2.69e-01  
29-Jun-2017 01:15:00, 2.69e-01  
29-Jun-2017 01:30:00, 2.69e-01  
29-Jun-2017 01:45:00, 2.69e-01  
29-Jun-2017 02:00:00, 2.69e-01  
29-Jun-2017 02:15:00, 2.69e-01  
29-Jun-2017 02:30:00, 2.69e-01  
29-Jun-2017 02:45:00, 2.69e-01  
29-Jun-2017 03:00:00, 2.69e-01  
29-Jun-2017 03:15:00, 2.69e-01  
29-Jun-2017 03:30:00, 2.69e-01  
29-Jun-2017 03:45:00, 2.69e-01  
29-Jun-2017 04:00:00, 2.69e-01  
29-Jun-2017 04:15:00, 2.69e-01  
29-Jun-2017 04:30:00, 2.69e-01  
29-Jun-2017 04:45:00, 2.69e-01  
29-Jun-2017 05:00:00, 2.69e-01  
29-Jun-2017 05:15:00, 2.69e-01  
29-Jun-2017 05:30:00, 2.69e-01  
29-Jun-2017 05:45:00, 2.69e-01  
29-Jun-2017 06:00:00, 2.69e-01  
29-Jun-2017 06:15:00, 2.69e-01  
29-Jun-2017 06:30:00, 2.69e-01  
29-Jun-2017 06:45:00, 2.69e-01  
29-Jun-2017 07:00:00, 2.69e-01  
29-Jun-2017 07:15:00, 2.69e-01  
29-Jun-2017 07:30:00, 2.69e-01  
29-Jun-2017 07:45:00, 2.69e-01  
29-Jun-2017 08:00:00, 2.69e-01  
29-Jun-2017 08:15:00, 2.68e-01  
29-Jun-2017 08:30:00, 2.68e-01  
29-Jun-2017 08:45:00, 2.68e-01  
29-Jun-2017 09:00:00, 2.68e-01  
29-Jun-2017 09:15:00, 2.69e-01  
29-Jun-2017 09:30:00, 2.69e-01

29-Jun-2017 09:45:00, 2.69e-01  
29-Jun-2017 10:00:00, 2.69e-01  
29-Jun-2017 10:15:00, 2.69e-01  
29-Jun-2017 10:30:00, 2.69e-01  
29-Jun-2017 10:45:00, 2.68e-01  
29-Jun-2017 11:00:00, 2.68e-01  
29-Jun-2017 11:15:00, 2.69e-01  
29-Jun-2017 11:30:00, 2.69e-01  
29-Jun-2017 11:45:00, 2.69e-01  
29-Jun-2017 12:00:00, 2.69e-01  
29-Jun-2017 12:15:00, 2.69e-01  
29-Jun-2017 12:30:00, 2.69e-01  
29-Jun-2017 12:45:00, 2.69e-01  
29-Jun-2017 13:00:00, 2.69e-01  
29-Jun-2017 13:15:00, 2.69e-01  
29-Jun-2017 13:30:00, 2.69e-01  
29-Jun-2017 13:45:00, 2.69e-01  
29-Jun-2017 14:00:00, 2.69e-01  
29-Jun-2017 14:15:00, 2.68e-01  
29-Jun-2017 14:30:00, 2.68e-01  
29-Jun-2017 14:45:00, 2.68e-01  
29-Jun-2017 15:00:00, 2.68e-01  
29-Jun-2017 15:15:00, 2.68e-01  
29-Jun-2017 15:30:00, 2.68e-01  
29-Jun-2017 15:45:00, 2.68e-01  
29-Jun-2017 16:00:00, 2.68e-01  
29-Jun-2017 16:15:00, 2.68e-01  
29-Jun-2017 16:30:00, 2.68e-01  
29-Jun-2017 16:45:00, 2.68e-01  
29-Jun-2017 17:00:00, 2.68e-01  
29-Jun-2017 17:15:00, 2.68e-01  
29-Jun-2017 17:30:00, 2.68e-01  
29-Jun-2017 17:45:00, 2.68e-01  
29-Jun-2017 18:00:00, 2.68e-01  
29-Jun-2017 18:15:00, 2.68e-01  
29-Jun-2017 18:30:00, 2.68e-01  
29-Jun-2017 18:45:00, 2.68e-01  
29-Jun-2017 19:00:00, 2.68e-01  
29-Jun-2017 19:15:00, 2.68e-01  
29-Jun-2017 19:30:00, 2.68e-01  
29-Jun-2017 19:45:00, 2.68e-01  
29-Jun-2017 20:00:00, 2.68e-01  
29-Jun-2017 20:15:00, 2.68e-01  
29-Jun-2017 20:30:00, 2.68e-01  
29-Jun-2017 20:45:00, 2.68e-01  
29-Jun-2017 21:00:00, 2.68e-01  
29-Jun-2017 21:15:00, 2.68e-01  
29-Jun-2017 21:30:00, 2.68e-01  
29-Jun-2017 21:45:00, 2.68e-01  
29-Jun-2017 22:00:00, 2.68e-01  
29-Jun-2017 22:15:00, 2.68e-01  
29-Jun-2017 22:30:00, 2.67e-01  
29-Jun-2017 22:45:00, 2.68e-01  
29-Jun-2017 23:00:00, 2.67e-01  
29-Jun-2017 23:15:00, 2.67e-01  
29-Jun-2017 23:30:00, 2.68e-01  
29-Jun-2017 23:45:00, 2.68e-01  
30-Jun-2017, 2.68e-01  
30-Jun-2017 00:15:00, 2.67e-01  
30-Jun-2017 00:30:00, 2.67e-01  
30-Jun-2017 00:45:00, 2.67e-01  
30-Jun-2017 01:00:00, 2.67e-01  
30-Jun-2017 01:15:00, 2.67e-01  
30-Jun-2017 01:30:00, 2.67e-01

|             |           |          |
|-------------|-----------|----------|
| 30-Jun-2017 | 01:45:00, | 2.67e-01 |
| 30-Jun-2017 | 02:00:00, | 2.67e-01 |
| 30-Jun-2017 | 02:15:00, | 2.67e-01 |
| 30-Jun-2017 | 02:30:00, | 2.67e-01 |
| 30-Jun-2017 | 02:45:00, | 2.67e-01 |
| 30-Jun-2017 | 03:00:00, | 2.67e-01 |
| 30-Jun-2017 | 03:15:00, | 2.67e-01 |
| 30-Jun-2017 | 03:30:00, | 2.67e-01 |
| 30-Jun-2017 | 03:45:00, | 2.67e-01 |
| 30-Jun-2017 | 04:00:00, | 2.67e-01 |
| 30-Jun-2017 | 04:15:00, | 2.67e-01 |
| 30-Jun-2017 | 04:30:00, | 2.67e-01 |
| 30-Jun-2017 | 04:45:00, | 2.67e-01 |
| 30-Jun-2017 | 05:00:00, | 2.67e-01 |
| 30-Jun-2017 | 05:15:00, | 2.68e-01 |
| 30-Jun-2017 | 05:30:00, | 2.67e-01 |
| 30-Jun-2017 | 05:45:00, | 2.67e-01 |
| 30-Jun-2017 | 06:00:00, | 2.67e-01 |
| 30-Jun-2017 | 06:15:00, | 2.67e-01 |
| 30-Jun-2017 | 06:30:00, | 2.67e-01 |
| 30-Jun-2017 | 06:45:00, | 2.67e-01 |
| 30-Jun-2017 | 07:00:00, | 2.67e-01 |
| 30-Jun-2017 | 07:15:00, | 2.67e-01 |
| 30-Jun-2017 | 07:30:00, | 2.67e-01 |
| 30-Jun-2017 | 07:45:00, | 2.67e-01 |
| 30-Jun-2017 | 08:00:00, | 2.67e-01 |
| 30-Jun-2017 | 08:15:00, | 2.67e-01 |
| 30-Jun-2017 | 08:30:00, | 2.68e-01 |
| 30-Jun-2017 | 08:45:00, | 2.69e-01 |
| 30-Jun-2017 | 09:00:00, | 2.69e-01 |
| 30-Jun-2017 | 09:15:00, | 2.69e-01 |
| 30-Jun-2017 | 09:30:00, | 2.69e-01 |
| 30-Jun-2017 | 09:45:00, | 2.69e-01 |
| 30-Jun-2017 | 10:00:00, | 2.71e-01 |
| 30-Jun-2017 | 10:15:00, | 2.71e-01 |
| 30-Jun-2017 | 10:30:00, | 2.72e-01 |
| 30-Jun-2017 | 10:45:00, | 2.72e-01 |
| 30-Jun-2017 | 11:00:00, | 2.72e-01 |
| 30-Jun-2017 | 11:15:00, | 2.72e-01 |
| 30-Jun-2017 | 11:30:00, | 2.72e-01 |
| 30-Jun-2017 | 11:45:00, | 2.71e-01 |
| 30-Jun-2017 | 12:00:00, | 2.71e-01 |
| 30-Jun-2017 | 12:15:00, | 2.72e-01 |
| 30-Jun-2017 | 12:30:00, | 2.72e-01 |
| 30-Jun-2017 | 12:45:00, | 2.72e-01 |
| 30-Jun-2017 | 13:00:00, | 2.71e-01 |
| 30-Jun-2017 | 13:15:00, | 2.71e-01 |
| 30-Jun-2017 | 13:30:00, | 2.71e-01 |
| 30-Jun-2017 | 13:45:00, | 2.71e-01 |
| 30-Jun-2017 | 14:00:00, | 2.71e-01 |
| 30-Jun-2017 | 14:15:00, | 2.71e-01 |
| 30-Jun-2017 | 14:30:00, | 2.71e-01 |
| 30-Jun-2017 | 14:45:00, | 2.71e-01 |
| 30-Jun-2017 | 15:00:00, | 2.71e-01 |
| 30-Jun-2017 | 15:15:00, | 2.71e-01 |
| 30-Jun-2017 | 15:30:00, | 2.71e-01 |
| 30-Jun-2017 | 15:45:00, | 2.71e-01 |
| 30-Jun-2017 | 16:00:00, | 2.71e-01 |
| 30-Jun-2017 | 16:15:00, | 2.71e-01 |
| 30-Jun-2017 | 16:30:00, | 2.71e-01 |
| 30-Jun-2017 | 16:45:00, | 2.71e-01 |
| 30-Jun-2017 | 17:00:00, | 2.71e-01 |
| 30-Jun-2017 | 17:15:00, | 2.71e-01 |
| 30-Jun-2017 | 17:30:00, | 2.71e-01 |

30-Jun-2017 17:45:00, 2.71e-01  
30-Jun-2017 18:00:00, 2.71e-01  
30-Jun-2017 18:15:00, 2.71e-01  
30-Jun-2017 18:30:00, 2.71e-01  
30-Jun-2017 18:45:00, 2.71e-01  
30-Jun-2017 19:00:00, 2.71e-01  
30-Jun-2017 19:15:00, 2.71e-01  
30-Jun-2017 19:30:00, 2.71e-01  
30-Jun-2017 19:45:00, 2.71e-01  
30-Jun-2017 20:00:00, 2.71e-01  
30-Jun-2017 20:15:00, 2.71e-01  
30-Jun-2017 20:30:00, 2.71e-01  
30-Jun-2017 20:45:00, 2.71e-01  
30-Jun-2017 21:00:00, 2.71e-01  
30-Jun-2017 21:15:00, 2.71e-01  
30-Jun-2017 21:30:00, 2.71e-01  
30-Jun-2017 21:45:00, 2.71e-01  
30-Jun-2017 22:00:00, 2.71e-01  
30-Jun-2017 22:15:00, 2.71e-01  
30-Jun-2017 22:30:00, 2.71e-01  
30-Jun-2017 22:45:00, 2.71e-01  
30-Jun-2017 23:00:00, 2.71e-01  
30-Jun-2017 23:15:00, 2.71e-01  
30-Jun-2017 23:30:00, 2.71e-01  
30-Jun-2017 23:45:00, 2.71e-01  
01-Jul-2017, 2.71e-01  
01-Jul-2017 00:15:00, 2.71e-01  
01-Jul-2017 00:30:00, 2.71e-01  
01-Jul-2017 00:45:00, 2.71e-01  
01-Jul-2017 01:00:00, 2.71e-01  
01-Jul-2017 01:15:00, 2.71e-01  
01-Jul-2017 01:30:00, 2.71e-01  
01-Jul-2017 01:45:00, 2.71e-01  
01-Jul-2017 02:00:00, 2.71e-01  
01-Jul-2017 02:15:00, 2.71e-01  
01-Jul-2017 02:30:00, 2.71e-01  
01-Jul-2017 02:45:00, 2.71e-01  
01-Jul-2017 03:00:00, 2.71e-01  
01-Jul-2017 03:15:00, 2.71e-01  
01-Jul-2017 03:30:00, 2.71e-01  
01-Jul-2017 03:45:00, 2.71e-01  
01-Jul-2017 04:00:00, 2.71e-01  
01-Jul-2017 04:15:00, 2.71e-01  
01-Jul-2017 04:30:00, 2.71e-01  
01-Jul-2017 04:45:00, 2.70e-01  
01-Jul-2017 05:00:00, 2.70e-01  
01-Jul-2017 05:15:00, 2.70e-01  
01-Jul-2017 05:30:00, 2.70e-01  
01-Jul-2017 05:45:00, 2.70e-01  
01-Jul-2017 06:00:00, 2.70e-01  
01-Jul-2017 06:15:00, 2.70e-01  
01-Jul-2017 06:30:00, 2.70e-01  
01-Jul-2017 06:45:00, 2.70e-01  
01-Jul-2017 07:00:00, 2.70e-01  
01-Jul-2017 07:15:00, 2.70e-01  
01-Jul-2017 07:30:00, 2.70e-01  
01-Jul-2017 07:45:00, 2.70e-01  
01-Jul-2017 08:00:00, 2.70e-01  
01-Jul-2017 08:15:00, 2.70e-01  
01-Jul-2017 08:30:00, 2.70e-01  
01-Jul-2017 08:45:00, 2.70e-01  
01-Jul-2017 09:00:00, 2.70e-01  
01-Jul-2017 09:15:00, 2.70e-01  
01-Jul-2017 09:30:00, 2.70e-01

01-Jul-2017 09:45:00, 2.70e-01  
01-Jul-2017 10:00:00, 2.69e-01  
01-Jul-2017 10:15:00, 2.69e-01  
01-Jul-2017 10:30:00, 2.69e-01  
01-Jul-2017 10:45:00, 2.69e-01  
01-Jul-2017 11:00:00, 2.69e-01  
01-Jul-2017 11:15:00, 2.69e-01  
01-Jul-2017 11:30:00, 2.69e-01  
01-Jul-2017 11:45:00, 2.69e-01  
01-Jul-2017 12:00:00, 2.69e-01  
01-Jul-2017 12:15:00, 2.69e-01  
01-Jul-2017 12:30:00, 2.69e-01  
01-Jul-2017 12:45:00, 2.69e-01  
01-Jul-2017 13:00:00, 2.69e-01  
01-Jul-2017 13:15:00, 2.69e-01  
01-Jul-2017 13:30:00, 2.69e-01  
01-Jul-2017 13:45:00, 2.69e-01  
01-Jul-2017 14:00:00, 2.69e-01  
01-Jul-2017 14:15:00, 2.69e-01  
01-Jul-2017 14:30:00, 2.69e-01  
01-Jul-2017 14:45:00, 2.68e-01  
01-Jul-2017 15:00:00, 2.68e-01  
01-Jul-2017 15:15:00, 2.68e-01  
01-Jul-2017 15:30:00, 2.68e-01  
01-Jul-2017 15:45:00, 2.68e-01  
01-Jul-2017 16:00:00, 2.68e-01  
01-Jul-2017 16:15:00, 2.68e-01  
01-Jul-2017 16:30:00, 2.68e-01  
01-Jul-2017 16:45:00, 2.68e-01  
01-Jul-2017 17:00:00, 2.68e-01  
01-Jul-2017 17:15:00, 2.68e-01  
01-Jul-2017 17:30:00, 2.68e-01  
01-Jul-2017 17:45:00, 2.68e-01  
01-Jul-2017 18:00:00, 2.68e-01  
01-Jul-2017 18:15:00, 2.68e-01  
01-Jul-2017 18:30:00, 2.68e-01  
01-Jul-2017 18:45:00, 2.68e-01  
01-Jul-2017 19:00:00, 2.68e-01  
01-Jul-2017 19:15:00, 2.68e-01  
01-Jul-2017 19:30:00, 2.68e-01  
01-Jul-2017 19:45:00, 2.68e-01  
01-Jul-2017 20:00:00, 2.68e-01  
01-Jul-2017 20:15:00, 2.68e-01  
01-Jul-2017 20:30:00, 2.68e-01  
01-Jul-2017 20:45:00, 2.68e-01  
01-Jul-2017 21:00:00, 2.68e-01  
01-Jul-2017 21:15:00, 2.68e-01  
01-Jul-2017 21:30:00, 2.68e-01  
01-Jul-2017 21:45:00, 2.68e-01  
01-Jul-2017 22:00:00, 2.68e-01  
01-Jul-2017 22:15:00, 2.68e-01  
01-Jul-2017 22:30:00, 2.68e-01  
01-Jul-2017 22:45:00, 2.69e-01  
01-Jul-2017 23:00:00, 2.69e-01  
01-Jul-2017 23:15:00, 2.69e-01  
01-Jul-2017 23:30:00, 2.69e-01  
01-Jul-2017 23:45:00, 2.69e-01  
02-Jul-2017, 2.69e-01  
02-Jul-2017 00:15:00, 2.69e-01  
02-Jul-2017 00:30:00, 2.69e-01  
02-Jul-2017 00:45:00, 2.69e-01  
02-Jul-2017 01:00:00, 2.69e-01  
02-Jul-2017 01:15:00, 2.69e-01  
02-Jul-2017 01:30:00, 2.69e-01

|             |           |          |
|-------------|-----------|----------|
| 02-Jul-2017 | 01:45:00, | 2.69e-01 |
| 02-Jul-2017 | 02:00:00, | 2.69e-01 |
| 02-Jul-2017 | 02:15:00, | 2.69e-01 |
| 02-Jul-2017 | 02:30:00, | 2.69e-01 |
| 02-Jul-2017 | 02:45:00, | 2.69e-01 |
| 02-Jul-2017 | 03:00:00, | 2.69e-01 |
| 02-Jul-2017 | 03:15:00, | 2.69e-01 |
| 02-Jul-2017 | 03:30:00, | 2.69e-01 |
| 02-Jul-2017 | 03:45:00, | 2.69e-01 |
| 02-Jul-2017 | 04:00:00, | 2.69e-01 |
| 02-Jul-2017 | 04:15:00, | 2.68e-01 |
| 02-Jul-2017 | 04:30:00, | 2.68e-01 |
| 02-Jul-2017 | 04:45:00, | 2.68e-01 |
| 02-Jul-2017 | 05:00:00, | 2.68e-01 |
| 02-Jul-2017 | 05:15:00, | 2.68e-01 |
| 02-Jul-2017 | 05:30:00, | 2.68e-01 |
| 02-Jul-2017 | 05:45:00, | 2.68e-01 |
| 02-Jul-2017 | 06:00:00, | 2.68e-01 |
| 02-Jul-2017 | 06:15:00, | 2.68e-01 |
| 02-Jul-2017 | 06:30:00, | 2.68e-01 |
| 02-Jul-2017 | 06:45:00, | 2.68e-01 |
| 02-Jul-2017 | 07:00:00, | 2.67e-01 |
| 02-Jul-2017 | 07:15:00, | 2.67e-01 |
| 02-Jul-2017 | 07:30:00, | 2.67e-01 |
| 02-Jul-2017 | 07:45:00, | 2.67e-01 |
| 02-Jul-2017 | 08:00:00, | 2.67e-01 |
| 02-Jul-2017 | 08:15:00, | 2.67e-01 |
| 02-Jul-2017 | 08:30:00, | 2.67e-01 |
| 02-Jul-2017 | 08:45:00, | 2.67e-01 |
| 02-Jul-2017 | 09:00:00, | 2.67e-01 |
| 02-Jul-2017 | 09:15:00, | 2.67e-01 |
| 02-Jul-2017 | 09:30:00, | 2.67e-01 |
| 02-Jul-2017 | 09:45:00, | 2.66e-01 |
| 02-Jul-2017 | 10:00:00, | 2.66e-01 |
| 02-Jul-2017 | 10:15:00, | 2.66e-01 |
| 02-Jul-2017 | 10:30:00, | 2.66e-01 |
| 02-Jul-2017 | 10:45:00, | 2.66e-01 |
| 02-Jul-2017 | 11:00:00, | 2.66e-01 |
| 02-Jul-2017 | 11:15:00, | 2.66e-01 |
| 02-Jul-2017 | 11:30:00, | 2.66e-01 |
| 02-Jul-2017 | 11:45:00, | 2.66e-01 |
| 02-Jul-2017 | 12:00:00, | 2.66e-01 |
| 02-Jul-2017 | 12:15:00, | 2.66e-01 |
| 02-Jul-2017 | 12:30:00, | 2.66e-01 |
| 02-Jul-2017 | 12:45:00, | 2.66e-01 |
| 02-Jul-2017 | 13:00:00, | 2.66e-01 |
| 02-Jul-2017 | 13:15:00, | 2.66e-01 |
| 02-Jul-2017 | 13:30:00, | 2.66e-01 |
| 02-Jul-2017 | 13:45:00, | 2.66e-01 |
| 02-Jul-2017 | 14:00:00, | 2.65e-01 |
| 02-Jul-2017 | 14:15:00, | 2.65e-01 |
| 02-Jul-2017 | 14:30:00, | 2.65e-01 |
| 02-Jul-2017 | 14:45:00, | 2.65e-01 |
| 02-Jul-2017 | 15:00:00, | 2.65e-01 |
| 02-Jul-2017 | 15:15:00, | 2.65e-01 |
| 02-Jul-2017 | 15:30:00, | 2.65e-01 |
| 02-Jul-2017 | 15:45:00, | 2.65e-01 |
| 02-Jul-2017 | 16:00:00, | 2.65e-01 |
| 02-Jul-2017 | 16:15:00, | 2.65e-01 |
| 02-Jul-2017 | 16:30:00, | 2.65e-01 |
| 02-Jul-2017 | 16:45:00, | 2.64e-01 |
| 02-Jul-2017 | 17:00:00, | 2.64e-01 |
| 02-Jul-2017 | 17:15:00, | 2.64e-01 |
| 02-Jul-2017 | 17:30:00, | 2.64e-01 |



02-Jul-2017 17:45:00, 2.64e-01  
02-Jul-2017 18:00:00, 2.64e-01  
02-Jul-2017 18:15:00, 2.64e-01  
02-Jul-2017 18:30:00, 2.64e-01  
02-Jul-2017 18:45:00, 2.64e-01  
02-Jul-2017 19:00:00, 2.64e-01  
02-Jul-2017 19:15:00, 2.64e-01  
02-Jul-2017 19:30:00, 2.64e-01  
02-Jul-2017 19:45:00, 2.64e-01  
02-Jul-2017 20:00:00, 2.64e-01  
02-Jul-2017 20:15:00, 2.64e-01  
02-Jul-2017 20:30:00, 2.64e-01  
02-Jul-2017 20:45:00, 2.64e-01  
02-Jul-2017 21:00:00, 2.64e-01  
02-Jul-2017 21:15:00, 2.64e-01  
02-Jul-2017 21:30:00, 2.64e-01  
02-Jul-2017 21:45:00, 2.64e-01  
02-Jul-2017 22:00:00, 2.64e-01  
02-Jul-2017 22:15:00, 2.64e-01  
02-Jul-2017 22:30:00, 2.64e-01  
02-Jul-2017 22:45:00, 2.65e-01  
02-Jul-2017 23:00:00, 2.65e-01  
02-Jul-2017 23:15:00, 2.65e-01  
02-Jul-2017 23:30:00, 2.65e-01  
02-Jul-2017 23:45:00, 2.65e-01  
03-Jul-2017, 2.65e-01  
03-Jul-2017 00:15:00, 2.65e-01  
03-Jul-2017 00:30:00, 2.65e-01  
03-Jul-2017 00:45:00, 2.65e-01  
03-Jul-2017 01:00:00, 2.65e-01  
03-Jul-2017 01:15:00, 2.65e-01  
03-Jul-2017 01:30:00, 2.65e-01  
03-Jul-2017 01:45:00, 2.65e-01  
03-Jul-2017 02:00:00, 2.65e-01  
03-Jul-2017 02:15:00, 2.65e-01  
03-Jul-2017 02:30:00, 2.65e-01  
03-Jul-2017 02:45:00, 2.65e-01  
03-Jul-2017 03:00:00, 2.65e-01  
03-Jul-2017 03:15:00, 2.65e-01  
03-Jul-2017 03:30:00, 2.65e-01  
03-Jul-2017 03:45:00, 2.65e-01  
03-Jul-2017 04:00:00, 2.65e-01  
03-Jul-2017 04:15:00, 2.65e-01  
03-Jul-2017 04:30:00, 2.65e-01  
03-Jul-2017 04:45:00, 2.65e-01  
03-Jul-2017 05:00:00, 2.65e-01  
03-Jul-2017 05:15:00, 2.65e-01  
03-Jul-2017 05:30:00, 2.65e-01  
03-Jul-2017 05:45:00, 2.65e-01  
03-Jul-2017 06:00:00, 2.65e-01  
03-Jul-2017 06:15:00, 2.65e-01  
03-Jul-2017 06:30:00, 2.65e-01  
03-Jul-2017 06:45:00, 2.65e-01  
03-Jul-2017 07:00:00, 2.65e-01  
03-Jul-2017 07:15:00, 2.65e-01  
03-Jul-2017 07:30:00, 2.65e-01  
03-Jul-2017 07:45:00, 2.65e-01  
03-Jul-2017 08:00:00, 2.65e-01  
03-Jul-2017 08:15:00, 2.65e-01  
03-Jul-2017 08:30:00, 2.65e-01  
03-Jul-2017 08:45:00, 2.65e-01  
03-Jul-2017 09:00:00, 2.65e-01  
03-Jul-2017 09:15:00, 2.65e-01  
03-Jul-2017 09:30:00, 2.65e-01

03-Jul-2017 09:45:00, 2.65e-01  
03-Jul-2017 10:00:00, 2.65e-01  
03-Jul-2017 10:15:00, 2.65e-01  
03-Jul-2017 10:30:00, 2.65e-01  
03-Jul-2017 10:45:00, 2.65e-01  
03-Jul-2017 11:00:00, 2.65e-01  
03-Jul-2017 11:15:00, 2.64e-01  
03-Jul-2017 11:30:00, 2.64e-01  
03-Jul-2017 11:45:00, 2.64e-01  
03-Jul-2017 12:00:00, 2.64e-01  
03-Jul-2017 12:15:00, 2.65e-01  
03-Jul-2017 12:30:00, 2.65e-01  
03-Jul-2017 12:45:00, 2.65e-01  
03-Jul-2017 13:00:00, 2.65e-01  
03-Jul-2017 13:15:00, 2.65e-01  
03-Jul-2017 13:30:00, 2.64e-01  
03-Jul-2017 13:45:00, 2.64e-01  
03-Jul-2017 14:00:00, 2.64e-01  
03-Jul-2017 14:15:00, 2.64e-01  
03-Jul-2017 14:30:00, 2.64e-01  
03-Jul-2017 14:45:00, 2.64e-01  
03-Jul-2017 15:00:00, 2.64e-01  
03-Jul-2017 15:15:00, 2.64e-01  
03-Jul-2017 15:30:00, 2.64e-01  
03-Jul-2017 15:45:00, 2.64e-01  
03-Jul-2017 16:00:00, 2.64e-01  
03-Jul-2017 16:15:00, 2.64e-01  
03-Jul-2017 16:30:00, 2.64e-01  
03-Jul-2017 16:45:00, 2.64e-01  
03-Jul-2017 17:00:00, 2.64e-01  
03-Jul-2017 17:15:00, 2.64e-01  
03-Jul-2017 17:30:00, 2.64e-01  
03-Jul-2017 17:45:00, 2.64e-01  
03-Jul-2017 18:00:00, 2.64e-01  
03-Jul-2017 18:15:00, 2.64e-01  
03-Jul-2017 18:30:00, 2.64e-01  
03-Jul-2017 18:45:00, 2.64e-01  
03-Jul-2017 19:00:00, 2.64e-01  
03-Jul-2017 19:15:00, 2.64e-01  
03-Jul-2017 19:30:00, 2.64e-01  
03-Jul-2017 19:45:00, 2.64e-01  
03-Jul-2017 20:00:00, 2.64e-01  
03-Jul-2017 20:15:00, 2.64e-01  
03-Jul-2017 20:30:00, 2.64e-01  
03-Jul-2017 20:45:00, 2.64e-01  
03-Jul-2017 21:00:00, 2.64e-01  
03-Jul-2017 21:15:00, 2.64e-01  
03-Jul-2017 21:30:00, 2.64e-01  
03-Jul-2017 21:45:00, 2.64e-01  
03-Jul-2017 22:00:00, 2.64e-01  
03-Jul-2017 22:15:00, 2.64e-01  
03-Jul-2017 22:30:00, 2.64e-01  
03-Jul-2017 22:45:00, 2.64e-01  
03-Jul-2017 23:00:00, 2.64e-01  
03-Jul-2017 23:15:00, 2.64e-01  
03-Jul-2017 23:30:00, 2.64e-01  
03-Jul-2017 23:45:00, 2.64e-01  
04-Jul-2017, 2.64e-01  
04-Jul-2017 00:15:00, 2.64e-01  
04-Jul-2017 00:30:00, 2.64e-01  
04-Jul-2017 00:45:00, 2.64e-01  
04-Jul-2017 01:00:00, 2.64e-01  
04-Jul-2017 01:15:00, 2.64e-01  
04-Jul-2017 01:30:00, 2.64e-01

04-Jul-2017 01:45:00, 2.63e-01  
04-Jul-2017 02:00:00, 2.63e-01  
04-Jul-2017 02:15:00, 2.63e-01  
04-Jul-2017 02:30:00, 2.63e-01  
04-Jul-2017 02:45:00, 2.63e-01  
04-Jul-2017 03:00:00, 2.63e-01  
04-Jul-2017 03:15:00, 2.63e-01  
04-Jul-2017 03:30:00, 2.63e-01  
04-Jul-2017 03:45:00, 2.63e-01  
04-Jul-2017 04:00:00, 2.63e-01  
04-Jul-2017 04:15:00, 2.63e-01  
04-Jul-2017 04:30:00, 2.63e-01  
04-Jul-2017 04:45:00, 2.63e-01  
04-Jul-2017 05:00:00, 2.63e-01  
04-Jul-2017 05:15:00, 2.63e-01  
04-Jul-2017 05:30:00, 2.63e-01  
04-Jul-2017 05:45:00, 2.63e-01  
04-Jul-2017 06:00:00, 2.63e-01  
04-Jul-2017 06:15:00, 2.63e-01  
04-Jul-2017 06:30:00, 2.63e-01  
04-Jul-2017 06:45:00, 2.63e-01  
04-Jul-2017 07:00:00, 2.63e-01  
04-Jul-2017 07:15:00, 2.63e-01  
04-Jul-2017 07:30:00, 2.63e-01  
04-Jul-2017 07:45:00, 2.63e-01  
04-Jul-2017 08:00:00, 2.62e-01  
04-Jul-2017 08:15:00, 2.62e-01  
04-Jul-2017 08:30:00, 2.62e-01  
04-Jul-2017 08:45:00, 2.63e-01  
04-Jul-2017 09:00:00, 2.63e-01  
04-Jul-2017 09:15:00, 2.62e-01  
04-Jul-2017 09:30:00, 2.62e-01  
04-Jul-2017 09:45:00, 2.62e-01  
04-Jul-2017 10:00:00, 2.62e-01  
04-Jul-2017 10:15:00, 2.62e-01  
04-Jul-2017 10:30:00, 2.62e-01  
04-Jul-2017 10:45:00, 2.62e-01  
04-Jul-2017 11:00:00, 2.62e-01  
04-Jul-2017 11:15:00, 2.62e-01  
04-Jul-2017 11:30:00, 2.62e-01  
04-Jul-2017 11:45:00, 2.62e-01  
04-Jul-2017 12:00:00, 2.62e-01  
04-Jul-2017 12:15:00, 2.62e-01  
04-Jul-2017 12:30:00, 2.61e-01  
04-Jul-2017 12:45:00, 2.61e-01  
04-Jul-2017 13:00:00, 2.61e-01  
04-Jul-2017 13:15:00, 2.61e-01  
04-Jul-2017 13:30:00, 2.61e-01  
04-Jul-2017 13:45:00, 2.61e-01  
04-Jul-2017 14:00:00, 2.61e-01  
04-Jul-2017 14:15:00, 2.61e-01  
04-Jul-2017 14:30:00, 2.61e-01  
04-Jul-2017 14:45:00, 2.61e-01  
04-Jul-2017 15:00:00, 2.61e-01  
04-Jul-2017 15:15:00, 2.61e-01  
04-Jul-2017 15:30:00, 2.61e-01  
04-Jul-2017 15:45:00, 2.61e-01  
04-Jul-2017 16:00:00, 2.61e-01  
04-Jul-2017 16:15:00, 2.60e-01  
04-Jul-2017 16:30:00, 2.60e-01  
04-Jul-2017 16:45:00, 2.60e-01  
04-Jul-2017 17:00:00, 2.60e-01  
04-Jul-2017 17:15:00, 2.60e-01  
04-Jul-2017 17:30:00, 2.60e-01

04-Jul-2017 17:45:00, 2.60e-01  
04-Jul-2017 18:00:00, 2.60e-01  
04-Jul-2017 18:15:00, 2.60e-01  
04-Jul-2017 18:30:00, 2.60e-01  
04-Jul-2017 18:45:00, 2.60e-01  
04-Jul-2017 19:00:00, 2.60e-01  
04-Jul-2017 19:15:00, 2.60e-01  
04-Jul-2017 19:30:00, 2.60e-01  
04-Jul-2017 19:45:00, 2.60e-01  
04-Jul-2017 20:00:00, 2.60e-01  
04-Jul-2017 20:15:00, 2.60e-01  
04-Jul-2017 20:30:00, 2.60e-01  
04-Jul-2017 20:45:00, 2.60e-01  
04-Jul-2017 21:00:00, 2.60e-01  
04-Jul-2017 21:15:00, 2.60e-01  
04-Jul-2017 21:30:00, 2.60e-01  
04-Jul-2017 21:45:00, 2.60e-01  
04-Jul-2017 22:00:00, 2.60e-01  
04-Jul-2017 22:15:00, 2.60e-01  
04-Jul-2017 22:30:00, 2.60e-01  
04-Jul-2017 22:45:00, 2.60e-01  
04-Jul-2017 23:00:00, 2.60e-01  
04-Jul-2017 23:15:00, 2.60e-01  
04-Jul-2017 23:30:00, 2.60e-01  
04-Jul-2017 23:45:00, 2.60e-01  
05-Jul-2017, 2.60e-01  
05-Jul-2017 00:15:00, 2.60e-01  
05-Jul-2017 00:30:00, 2.60e-01  
05-Jul-2017 00:45:00, 2.60e-01  
05-Jul-2017 01:00:00, 2.60e-01  
05-Jul-2017 01:15:00, 2.60e-01  
05-Jul-2017 01:30:00, 2.60e-01  
05-Jul-2017 01:45:00, 2.60e-01  
05-Jul-2017 02:00:00, 2.60e-01  
05-Jul-2017 02:15:00, 2.60e-01  
05-Jul-2017 02:30:00, 2.60e-01  
05-Jul-2017 02:45:00, 2.60e-01  
05-Jul-2017 03:00:00, 2.60e-01  
05-Jul-2017 03:15:00, 2.60e-01  
05-Jul-2017 03:30:00, 2.60e-01  
05-Jul-2017 03:45:00, 2.60e-01  
05-Jul-2017 04:00:00, 2.60e-01  
05-Jul-2017 04:15:00, 2.60e-01  
05-Jul-2017 04:30:00, 2.60e-01  
05-Jul-2017 04:45:00, 2.60e-01  
05-Jul-2017 05:00:00, 2.60e-01  
05-Jul-2017 05:15:00, 2.60e-01  
05-Jul-2017 05:30:00, 2.60e-01  
05-Jul-2017 05:45:00, 2.60e-01  
05-Jul-2017 06:00:00, 2.60e-01  
05-Jul-2017 06:15:00, 2.60e-01  
05-Jul-2017 06:30:00, 2.60e-01  
05-Jul-2017 06:45:00, 2.60e-01  
05-Jul-2017 07:00:00, 2.60e-01  
05-Jul-2017 07:15:00, 2.60e-01  
05-Jul-2017 07:30:00, 2.60e-01  
05-Jul-2017 07:45:00, 2.60e-01  
05-Jul-2017 08:00:00, 2.60e-01  
05-Jul-2017 08:15:00, 2.60e-01  
05-Jul-2017 08:30:00, 2.60e-01  
05-Jul-2017 08:45:00, 2.60e-01  
05-Jul-2017 09:00:00, 2.60e-01  
05-Jul-2017 09:15:00, 2.59e-01  
05-Jul-2017 09:30:00, 2.59e-01

05-Jul-2017 09:45:00, 2.59e-01  
05-Jul-2017 10:00:00, 2.59e-01  
05-Jul-2017 10:15:00, 2.59e-01  
05-Jul-2017 10:30:00, 2.59e-01  
05-Jul-2017 10:45:00, 2.59e-01  
05-Jul-2017 11:00:00, 2.59e-01  
05-Jul-2017 11:15:00, 2.59e-01  
05-Jul-2017 11:30:00, 2.59e-01  
05-Jul-2017 11:45:00, 2.59e-01  
05-Jul-2017 12:00:00, 2.59e-01  
05-Jul-2017 12:15:00, 2.59e-01  
05-Jul-2017 12:30:00, 2.59e-01  
05-Jul-2017 12:45:00, 2.59e-01  
05-Jul-2017 13:00:00, 2.59e-01  
05-Jul-2017 13:15:00, 2.58e-01  
05-Jul-2017 13:30:00, 2.58e-01  
05-Jul-2017 13:45:00, 2.58e-01  
05-Jul-2017 14:00:00, 2.58e-01  
05-Jul-2017 14:15:00, 2.58e-01  
05-Jul-2017 14:30:00, 2.58e-01  
05-Jul-2017 14:45:00, 2.58e-01  
05-Jul-2017 15:00:00, 2.58e-01  
05-Jul-2017 15:15:00, 2.58e-01  
05-Jul-2017 15:30:00, 2.58e-01  
05-Jul-2017 15:45:00, 2.58e-01  
05-Jul-2017 16:00:00, 2.58e-01  
05-Jul-2017 16:15:00, 2.58e-01  
05-Jul-2017 16:30:00, 2.58e-01  
05-Jul-2017 16:45:00, 2.58e-01  
05-Jul-2017 17:00:00, 2.58e-01  
05-Jul-2017 17:15:00, 2.58e-01  
05-Jul-2017 17:30:00, 2.58e-01  
05-Jul-2017 17:45:00, 2.58e-01  
05-Jul-2017 18:00:00, 2.58e-01  
05-Jul-2017 18:15:00, 2.58e-01  
05-Jul-2017 18:30:00, 2.58e-01  
05-Jul-2017 18:45:00, 2.58e-01  
05-Jul-2017 19:00:00, 2.58e-01  
05-Jul-2017 19:15:00, 2.58e-01  
05-Jul-2017 19:30:00, 2.58e-01  
05-Jul-2017 19:45:00, 2.58e-01  
05-Jul-2017 20:00:00, 2.58e-01  
05-Jul-2017 20:15:00, 2.58e-01  
05-Jul-2017 20:30:00, 2.58e-01  
05-Jul-2017 20:45:00, 2.58e-01  
05-Jul-2017 21:00:00, 2.58e-01  
05-Jul-2017 21:15:00, 2.58e-01  
05-Jul-2017 21:30:00, 2.58e-01  
05-Jul-2017 21:45:00, 2.58e-01  
05-Jul-2017 22:00:00, 2.58e-01  
05-Jul-2017 22:15:00, 2.58e-01  
05-Jul-2017 22:30:00, 2.58e-01  
05-Jul-2017 22:45:00, 2.58e-01  
05-Jul-2017 23:00:00, 2.58e-01  
05-Jul-2017 23:15:00, 2.58e-01  
05-Jul-2017 23:30:00, 2.58e-01  
05-Jul-2017 23:45:00, 2.58e-01  
06-Jul-2017, 2.58e-01  
06-Jul-2017 00:15:00, 2.58e-01  
06-Jul-2017 00:30:00, 2.58e-01  
06-Jul-2017 00:45:00, 2.58e-01  
06-Jul-2017 01:00:00, 2.58e-01  
06-Jul-2017 01:15:00, 2.58e-01  
06-Jul-2017 01:30:00, 2.58e-01

|             |           |          |
|-------------|-----------|----------|
| 06-Jul-2017 | 01:45:00, | 2.58e-01 |
| 06-Jul-2017 | 02:00:00, | 2.58e-01 |
| 06-Jul-2017 | 02:15:00, | 2.58e-01 |
| 06-Jul-2017 | 02:30:00, | 2.58e-01 |
| 06-Jul-2017 | 02:45:00, | 2.58e-01 |
| 06-Jul-2017 | 03:00:00, | 2.58e-01 |
| 06-Jul-2017 | 03:15:00, | 2.58e-01 |
| 06-Jul-2017 | 03:30:00, | 2.58e-01 |
| 06-Jul-2017 | 03:45:00, | 2.58e-01 |
| 06-Jul-2017 | 04:00:00, | 2.58e-01 |
| 06-Jul-2017 | 04:15:00, | 2.58e-01 |
| 06-Jul-2017 | 04:30:00, | 2.58e-01 |
| 06-Jul-2017 | 04:45:00, | 2.58e-01 |
| 06-Jul-2017 | 05:00:00, | 2.58e-01 |
| 06-Jul-2017 | 05:15:00, | 2.58e-01 |
| 06-Jul-2017 | 05:30:00, | 2.58e-01 |
| 06-Jul-2017 | 05:45:00, | 2.58e-01 |
| 06-Jul-2017 | 06:00:00, | 2.57e-01 |
| 06-Jul-2017 | 06:15:00, | 2.58e-01 |
| 06-Jul-2017 | 06:30:00, | 2.57e-01 |
| 06-Jul-2017 | 06:45:00, | 2.57e-01 |
| 06-Jul-2017 | 07:00:00, | 2.57e-01 |
| 06-Jul-2017 | 07:15:00, | 2.57e-01 |
| 06-Jul-2017 | 07:30:00, | 2.57e-01 |
| 06-Jul-2017 | 07:45:00, | 2.57e-01 |
| 06-Jul-2017 | 08:00:00, | 2.57e-01 |
| 06-Jul-2017 | 08:15:00, | 2.57e-01 |
| 06-Jul-2017 | 08:30:00, | 2.57e-01 |
| 06-Jul-2017 | 08:45:00, | 2.57e-01 |
| 06-Jul-2017 | 09:00:00, | 2.57e-01 |
| 06-Jul-2017 | 09:15:00, | 2.57e-01 |
| 06-Jul-2017 | 09:30:00, | 2.57e-01 |
| 06-Jul-2017 | 09:45:00, | 2.57e-01 |
| 06-Jul-2017 | 10:00:00, | 2.57e-01 |
| 06-Jul-2017 | 10:15:00, | 2.57e-01 |
| 06-Jul-2017 | 10:30:00, | 2.57e-01 |
| 06-Jul-2017 | 10:45:00, | 2.56e-01 |
| 06-Jul-2017 | 11:00:00, | 2.57e-01 |
| 06-Jul-2017 | 11:15:00, | 2.56e-01 |
| 06-Jul-2017 | 11:30:00, | 2.56e-01 |
| 06-Jul-2017 | 11:45:00, | 2.56e-01 |
| 06-Jul-2017 | 12:00:00, | 2.56e-01 |
| 06-Jul-2017 | 12:15:00, | 2.56e-01 |
| 06-Jul-2017 | 12:30:00, | 2.56e-01 |
| 06-Jul-2017 | 12:45:00, | 2.56e-01 |
| 06-Jul-2017 | 13:00:00, | 2.56e-01 |
| 06-Jul-2017 | 13:15:00, | 2.56e-01 |
| 06-Jul-2017 | 13:30:00, | 2.56e-01 |
| 06-Jul-2017 | 13:45:00, | 2.56e-01 |
| 06-Jul-2017 | 14:00:00, | 2.56e-01 |
| 06-Jul-2017 | 14:15:00, | 2.56e-01 |
| 06-Jul-2017 | 14:30:00, | 2.56e-01 |
| 06-Jul-2017 | 14:45:00, | 2.56e-01 |
| 06-Jul-2017 | 15:00:00, | 2.56e-01 |
| 06-Jul-2017 | 15:15:00, | 2.56e-01 |
| 06-Jul-2017 | 15:30:00, | 2.56e-01 |
| 06-Jul-2017 | 15:45:00, | 2.56e-01 |
| 06-Jul-2017 | 16:00:00, | 2.55e-01 |
| 06-Jul-2017 | 16:15:00, | 2.55e-01 |
| 06-Jul-2017 | 16:30:00, | 2.55e-01 |
| 06-Jul-2017 | 16:45:00, | 2.55e-01 |
| 06-Jul-2017 | 17:00:00, | 2.55e-01 |
| 06-Jul-2017 | 17:15:00, | 2.55e-01 |
| 06-Jul-2017 | 17:30:00, | 2.55e-01 |

06-Jul-2017 17:45:00, 2.55e-01  
06-Jul-2017 18:00:00, 2.55e-01  
06-Jul-2017 18:15:00, 2.55e-01  
06-Jul-2017 18:30:00, 2.55e-01  
06-Jul-2017 18:45:00, 2.55e-01  
06-Jul-2017 19:00:00, 2.55e-01  
06-Jul-2017 19:15:00, 2.55e-01  
06-Jul-2017 19:30:00, 2.55e-01  
06-Jul-2017 19:45:00, 2.55e-01  
06-Jul-2017 20:00:00, 2.55e-01  
06-Jul-2017 20:15:00, 2.55e-01  
06-Jul-2017 20:30:00, 2.55e-01  
06-Jul-2017 20:45:00, 2.55e-01  
06-Jul-2017 21:00:00, 2.55e-01  
06-Jul-2017 21:15:00, 2.55e-01  
06-Jul-2017 21:30:00, 2.55e-01  
06-Jul-2017 21:45:00, 2.55e-01  
06-Jul-2017 22:00:00, 2.55e-01  
06-Jul-2017 22:15:00, 2.55e-01  
06-Jul-2017 22:30:00, 2.55e-01  
06-Jul-2017 22:45:00, 2.55e-01  
06-Jul-2017 23:00:00, 2.55e-01  
06-Jul-2017 23:15:00, 2.55e-01  
06-Jul-2017 23:30:00, 2.55e-01  
06-Jul-2017 23:45:00, 2.55e-01  
07-Jul-2017, 2.55e-01  
07-Jul-2017 00:15:00, 2.55e-01  
07-Jul-2017 00:30:00, 2.55e-01  
07-Jul-2017 00:45:00, 2.55e-01  
07-Jul-2017 01:00:00, 2.55e-01  
07-Jul-2017 01:15:00, 2.55e-01  
07-Jul-2017 01:30:00, 2.55e-01  
07-Jul-2017 01:45:00, 2.55e-01  
07-Jul-2017 02:00:00, 2.55e-01  
07-Jul-2017 02:15:00, 2.55e-01  
07-Jul-2017 02:30:00, 2.55e-01  
07-Jul-2017 02:45:00, 2.55e-01  
07-Jul-2017 03:00:00, 2.55e-01  
07-Jul-2017 03:15:00, 2.55e-01  
07-Jul-2017 03:30:00, 2.55e-01  
07-Jul-2017 03:45:00, 2.55e-01  
07-Jul-2017 04:00:00, 2.55e-01  
07-Jul-2017 04:15:00, 2.55e-01  
07-Jul-2017 04:30:00, 2.55e-01  
07-Jul-2017 04:45:00, 2.55e-01  
07-Jul-2017 05:00:00, 2.55e-01  
07-Jul-2017 05:15:00, 2.54e-01  
07-Jul-2017 05:30:00, 2.55e-01  
07-Jul-2017 05:45:00, 2.55e-01  
07-Jul-2017 06:00:00, 2.55e-01  
07-Jul-2017 06:15:00, 2.55e-01  
07-Jul-2017 06:30:00, 2.55e-01  
07-Jul-2017 06:45:00, 2.54e-01  
07-Jul-2017 07:00:00, 2.54e-01  
07-Jul-2017 07:15:00, 2.54e-01  
07-Jul-2017 07:30:00, 2.54e-01  
07-Jul-2017 07:45:00, 2.54e-01  
07-Jul-2017 08:00:00, 2.54e-01  
07-Jul-2017 08:15:00, 2.54e-01  
07-Jul-2017 08:30:00, 2.54e-01  
07-Jul-2017 08:45:00, 2.54e-01  
07-Jul-2017 09:00:00, 2.54e-01  
07-Jul-2017 09:15:00, 2.54e-01  
07-Jul-2017 09:30:00, 2.54e-01

07-Jul-2017 09:45:00, 2.54e-01  
07-Jul-2017 10:00:00, 2.54e-01  
07-Jul-2017 10:15:00, 2.54e-01  
07-Jul-2017 10:30:00, 2.53e-01  
07-Jul-2017 10:45:00, 2.53e-01  
07-Jul-2017 11:00:00, 2.53e-01  
07-Jul-2017 11:15:00, 2.53e-01  
07-Jul-2017 11:30:00, 2.53e-01  
07-Jul-2017 11:45:00, 2.53e-01  
07-Jul-2017 12:00:00, 2.53e-01  
07-Jul-2017 12:15:00, 2.53e-01  
07-Jul-2017 12:30:00, 2.53e-01  
07-Jul-2017 12:45:00, 2.53e-01  
07-Jul-2017 13:00:00, 2.53e-01  
07-Jul-2017 13:15:00, 2.53e-01  
07-Jul-2017 13:30:00, 2.53e-01  
07-Jul-2017 13:45:00, 2.53e-01  
07-Jul-2017 14:00:00, 2.53e-01  
07-Jul-2017 14:15:00, 2.53e-01  
07-Jul-2017 14:30:00, 2.53e-01  
07-Jul-2017 14:45:00, 2.53e-01  
07-Jul-2017 15:00:00, 2.53e-01  
07-Jul-2017 15:15:00, 2.53e-01  
07-Jul-2017 15:30:00, 2.53e-01  
07-Jul-2017 15:45:00, 2.52e-01  
07-Jul-2017 16:00:00, 2.52e-01  
07-Jul-2017 16:15:00, 2.52e-01  
07-Jul-2017 16:30:00, 2.52e-01  
07-Jul-2017 16:45:00, 2.52e-01  
07-Jul-2017 17:00:00, 2.52e-01  
07-Jul-2017 17:15:00, 2.52e-01  
07-Jul-2017 17:30:00, 2.52e-01  
07-Jul-2017 17:45:00, 2.52e-01  
07-Jul-2017 18:00:00, 2.52e-01  
07-Jul-2017 18:15:00, 2.52e-01  
07-Jul-2017 18:30:00, 2.52e-01  
07-Jul-2017 18:45:00, 2.52e-01  
07-Jul-2017 19:00:00, 2.52e-01  
07-Jul-2017 19:15:00, 2.52e-01  
07-Jul-2017 19:30:00, 2.52e-01  
07-Jul-2017 19:45:00, 2.52e-01  
07-Jul-2017 20:00:00, 2.52e-01  
07-Jul-2017 20:15:00, 2.52e-01  
07-Jul-2017 20:30:00, 2.52e-01  
07-Jul-2017 20:45:00, 2.52e-01  
07-Jul-2017 21:00:00, 2.52e-01  
07-Jul-2017 21:15:00, 2.52e-01  
07-Jul-2017 21:30:00, 2.52e-01  
07-Jul-2017 21:45:00, 2.52e-01  
07-Jul-2017 22:00:00, 2.52e-01  
07-Jul-2017 22:15:00, 2.52e-01  
07-Jul-2017 22:30:00, 2.52e-01  
07-Jul-2017 22:45:00, 2.52e-01  
07-Jul-2017 23:00:00, 2.52e-01  
07-Jul-2017 23:15:00, 2.52e-01  
07-Jul-2017 23:30:00, 2.52e-01  
07-Jul-2017 23:45:00, 2.52e-01  
08-Jul-2017, 2.52e-01  
08-Jul-2017 00:15:00, 2.52e-01  
08-Jul-2017 00:30:00, 2.52e-01  
08-Jul-2017 00:45:00, 2.52e-01  
08-Jul-2017 01:00:00, 2.52e-01  
08-Jul-2017 01:15:00, 2.52e-01  
08-Jul-2017 01:30:00, 2.52e-01



|             |           |          |
|-------------|-----------|----------|
| 08-Jul-2017 | 01:45:00, | 2.52e-01 |
| 08-Jul-2017 | 02:00:00, | 2.52e-01 |
| 08-Jul-2017 | 02:15:00, | 2.52e-01 |
| 08-Jul-2017 | 02:30:00, | 2.51e-01 |
| 08-Jul-2017 | 02:45:00, | 2.51e-01 |
| 08-Jul-2017 | 03:00:00, | 2.51e-01 |
| 08-Jul-2017 | 03:15:00, | 2.51e-01 |
| 08-Jul-2017 | 03:30:00, | 2.51e-01 |
| 08-Jul-2017 | 03:45:00, | 2.51e-01 |
| 08-Jul-2017 | 04:00:00, | 2.51e-01 |
| 08-Jul-2017 | 04:15:00, | 2.51e-01 |
| 08-Jul-2017 | 04:30:00, | 2.51e-01 |
| 08-Jul-2017 | 04:45:00, | 2.51e-01 |
| 08-Jul-2017 | 05:00:00, | 2.51e-01 |
| 08-Jul-2017 | 05:15:00, | 2.51e-01 |
| 08-Jul-2017 | 05:30:00, | 2.51e-01 |
| 08-Jul-2017 | 05:45:00, | 2.51e-01 |
| 08-Jul-2017 | 06:00:00, | 2.51e-01 |
| 08-Jul-2017 | 06:15:00, | 2.51e-01 |
| 08-Jul-2017 | 06:30:00, | 2.51e-01 |
| 08-Jul-2017 | 06:45:00, | 2.51e-01 |
| 08-Jul-2017 | 07:00:00, | 2.51e-01 |
| 08-Jul-2017 | 07:15:00, | 2.51e-01 |
| 08-Jul-2017 | 07:30:00, | 2.51e-01 |
| 08-Jul-2017 | 07:45:00, | 2.51e-01 |
| 08-Jul-2017 | 08:00:00, | 2.51e-01 |
| 08-Jul-2017 | 08:15:00, | 2.51e-01 |
| 08-Jul-2017 | 08:30:00, | 2.50e-01 |
| 08-Jul-2017 | 08:45:00, | 2.50e-01 |
| 08-Jul-2017 | 09:00:00, | 2.50e-01 |
| 08-Jul-2017 | 09:15:00, | NaN      |
| 08-Jul-2017 | 09:30:00, | 2.50e-01 |
| 08-Jul-2017 | 09:45:00, | 2.50e-01 |
| 08-Jul-2017 | 10:00:00, | 2.50e-01 |
| 08-Jul-2017 | 10:15:00, | 2.50e-01 |
| 08-Jul-2017 | 10:30:00, | 2.50e-01 |
| 08-Jul-2017 | 10:45:00, | 2.50e-01 |
| 08-Jul-2017 | 11:00:00, | 2.50e-01 |
| 08-Jul-2017 | 11:15:00, | 2.50e-01 |
| 08-Jul-2017 | 11:30:00, | 2.50e-01 |
| 08-Jul-2017 | 11:45:00, | 2.50e-01 |
| 08-Jul-2017 | 12:00:00, | 2.49e-01 |
| 08-Jul-2017 | 12:15:00, | 2.49e-01 |
| 08-Jul-2017 | 12:30:00, | 2.49e-01 |
| 08-Jul-2017 | 12:45:00, | 2.49e-01 |
| 08-Jul-2017 | 13:00:00, | 2.49e-01 |
| 08-Jul-2017 | 13:15:00, | 2.49e-01 |
| 08-Jul-2017 | 13:30:00, | 2.49e-01 |
| 08-Jul-2017 | 13:45:00, | 2.49e-01 |
| 08-Jul-2017 | 14:00:00, | 2.49e-01 |
| 08-Jul-2017 | 14:15:00, | 2.49e-01 |
| 08-Jul-2017 | 14:30:00, | 2.49e-01 |
| 08-Jul-2017 | 14:45:00, | 2.49e-01 |
| 08-Jul-2017 | 15:00:00, | 2.49e-01 |
| 08-Jul-2017 | 15:15:00, | 2.49e-01 |
| 08-Jul-2017 | 15:30:00, | 2.49e-01 |
| 08-Jul-2017 | 15:45:00, | 2.49e-01 |
| 08-Jul-2017 | 16:00:00, | 2.49e-01 |
| 08-Jul-2017 | 16:15:00, | 2.49e-01 |
| 08-Jul-2017 | 16:30:00, | 2.48e-01 |
| 08-Jul-2017 | 16:45:00, | 2.48e-01 |
| 08-Jul-2017 | 17:00:00, | 2.48e-01 |
| 08-Jul-2017 | 17:15:00, | 2.48e-01 |
| 08-Jul-2017 | 17:30:00, | 2.48e-01 |

08-Jul-2017 17:45:00, 2.48e-01  
08-Jul-2017 18:00:00, 2.48e-01  
08-Jul-2017 18:15:00, 2.48e-01  
08-Jul-2017 18:30:00, 2.48e-01  
08-Jul-2017 18:45:00, 2.48e-01  
08-Jul-2017 19:00:00, 2.48e-01  
08-Jul-2017 19:15:00, 2.48e-01  
08-Jul-2017 19:30:00, 2.48e-01  
08-Jul-2017 19:45:00, 2.48e-01  
08-Jul-2017 20:00:00, 2.48e-01  
08-Jul-2017 20:15:00, 2.48e-01  
08-Jul-2017 20:30:00, 2.48e-01  
08-Jul-2017 20:45:00, 2.48e-01  
08-Jul-2017 21:00:00, 2.48e-01  
08-Jul-2017 21:15:00, 2.48e-01  
08-Jul-2017 21:30:00, 2.48e-01  
08-Jul-2017 21:45:00, 2.48e-01  
08-Jul-2017 22:00:00, 2.48e-01  
08-Jul-2017 22:15:00, 2.48e-01  
08-Jul-2017 22:30:00, 2.48e-01  
08-Jul-2017 22:45:00, 2.48e-01  
08-Jul-2017 23:00:00, 2.48e-01  
08-Jul-2017 23:15:00, 2.48e-01  
08-Jul-2017 23:30:00, 2.48e-01  
08-Jul-2017 23:45:00, 2.48e-01  
09-Jul-2017, 2.48e-01  
09-Jul-2017 00:15:00, 2.48e-01  
09-Jul-2017 00:30:00, 2.48e-01  
09-Jul-2017 00:45:00, 2.48e-01  
09-Jul-2017 01:00:00, 2.48e-01  
09-Jul-2017 01:15:00, 2.48e-01  
09-Jul-2017 01:30:00, 2.48e-01  
09-Jul-2017 01:45:00, 2.48e-01  
09-Jul-2017 02:00:00, 2.48e-01  
09-Jul-2017 02:15:00, 2.48e-01  
09-Jul-2017 02:30:00, 2.48e-01  
09-Jul-2017 02:45:00, 2.48e-01  
09-Jul-2017 03:00:00, 2.48e-01  
09-Jul-2017 03:15:00, 2.48e-01  
09-Jul-2017 03:30:00, 2.48e-01  
09-Jul-2017 03:45:00, 2.48e-01  
09-Jul-2017 04:00:00, 2.48e-01  
09-Jul-2017 04:15:00, 2.47e-01  
09-Jul-2017 04:30:00, 2.48e-01  
09-Jul-2017 04:45:00, 2.47e-01  
09-Jul-2017 05:00:00, 2.47e-01  
09-Jul-2017 05:15:00, 2.48e-01  
09-Jul-2017 05:30:00, 2.47e-01  
09-Jul-2017 05:45:00, 2.47e-01  
09-Jul-2017 06:00:00, 2.47e-01  
09-Jul-2017 06:15:00, 2.47e-01  
09-Jul-2017 06:30:00, 2.47e-01  
09-Jul-2017 06:45:00, 2.47e-01  
09-Jul-2017 07:00:00, 2.47e-01  
09-Jul-2017 07:15:00, 2.47e-01  
09-Jul-2017 07:30:00, 2.47e-01  
09-Jul-2017 07:45:00, 2.47e-01  
09-Jul-2017 08:00:00, 2.47e-01  
09-Jul-2017 08:15:00, 2.47e-01  
09-Jul-2017 08:30:00, 2.47e-01  
09-Jul-2017 08:45:00, 2.47e-01  
09-Jul-2017 09:00:00, 2.46e-01  
09-Jul-2017 09:15:00, 2.46e-01  
09-Jul-2017 09:30:00, 2.46e-01

09-Jul-2017 09:45:00, 2.46e-01  
09-Jul-2017 10:00:00, 2.46e-01  
09-Jul-2017 10:15:00, 2.46e-01  
09-Jul-2017 10:30:00, 2.46e-01  
09-Jul-2017 10:45:00, 2.46e-01  
09-Jul-2017 11:00:00, 2.46e-01  
09-Jul-2017 11:15:00, 2.46e-01  
09-Jul-2017 11:30:00, 2.46e-01  
09-Jul-2017 11:45:00, 2.46e-01  
09-Jul-2017 12:00:00, 2.45e-01  
09-Jul-2017 12:15:00, 2.45e-01  
09-Jul-2017 12:30:00, 2.45e-01  
09-Jul-2017 12:45:00, 2.45e-01  
09-Jul-2017 13:00:00, 2.45e-01  
09-Jul-2017 13:15:00, 2.45e-01  
09-Jul-2017 13:30:00, 2.45e-01  
09-Jul-2017 13:45:00, 2.45e-01  
09-Jul-2017 14:00:00, 2.45e-01  
09-Jul-2017 14:15:00, 2.45e-01  
09-Jul-2017 14:30:00, 2.45e-01  
09-Jul-2017 14:45:00, 2.45e-01  
09-Jul-2017 15:00:00, 2.45e-01  
09-Jul-2017 15:15:00, 2.45e-01  
09-Jul-2017 15:30:00, 2.45e-01  
09-Jul-2017 15:45:00, 2.45e-01  
09-Jul-2017 16:00:00, 2.44e-01  
09-Jul-2017 16:15:00, 2.45e-01  
09-Jul-2017 16:30:00, 2.44e-01  
09-Jul-2017 16:45:00, 2.45e-01  
09-Jul-2017 17:00:00, 2.44e-01  
09-Jul-2017 17:15:00, 2.44e-01  
09-Jul-2017 17:30:00, 2.44e-01  
09-Jul-2017 17:45:00, 2.44e-01  
09-Jul-2017 18:00:00, 2.44e-01  
09-Jul-2017 18:15:00, 2.44e-01  
09-Jul-2017 18:30:00, 2.44e-01  
09-Jul-2017 18:45:00, 2.44e-01  
09-Jul-2017 19:00:00, 2.44e-01  
09-Jul-2017 19:15:00, 2.44e-01  
09-Jul-2017 19:30:00, 2.44e-01  
09-Jul-2017 19:45:00, 2.44e-01  
09-Jul-2017 20:00:00, 2.44e-01  
09-Jul-2017 20:15:00, 2.44e-01  
09-Jul-2017 20:30:00, 2.44e-01  
09-Jul-2017 20:45:00, 2.44e-01  
09-Jul-2017 21:00:00, 2.44e-01  
09-Jul-2017 21:15:00, 2.44e-01  
09-Jul-2017 21:30:00, 2.44e-01  
09-Jul-2017 21:45:00, 2.44e-01  
09-Jul-2017 22:00:00, 2.44e-01  
09-Jul-2017 22:15:00, 2.44e-01  
09-Jul-2017 22:30:00, 2.44e-01  
09-Jul-2017 22:45:00, 2.44e-01  
09-Jul-2017 23:00:00, 2.44e-01  
09-Jul-2017 23:15:00, 2.44e-01  
09-Jul-2017 23:30:00, 2.44e-01  
09-Jul-2017 23:45:00, 2.44e-01  
10-Jul-2017, 2.44e-01  
10-Jul-2017 00:15:00, 2.44e-01  
10-Jul-2017 00:30:00, 2.44e-01  
10-Jul-2017 00:45:00, 2.44e-01  
10-Jul-2017 01:00:00, 2.44e-01  
10-Jul-2017 01:15:00, 2.44e-01  
10-Jul-2017 01:30:00, 2.44e-01

10-Jul-2017 01:45:00, 2.44e-01  
10-Jul-2017 02:00:00, 2.44e-01  
10-Jul-2017 02:15:00, 2.44e-01  
10-Jul-2017 02:30:00, 2.44e-01  
10-Jul-2017 02:45:00, 2.44e-01  
10-Jul-2017 03:00:00, 2.44e-01  
10-Jul-2017 03:15:00, 2.44e-01  
10-Jul-2017 03:30:00, 2.44e-01  
10-Jul-2017 03:45:00, 2.44e-01  
10-Jul-2017 04:00:00, 2.44e-01  
10-Jul-2017 04:15:00, 2.44e-01  
10-Jul-2017 04:30:00, 2.44e-01  
10-Jul-2017 04:45:00, 2.44e-01  
10-Jul-2017 05:00:00, 2.44e-01  
10-Jul-2017 05:15:00, 2.44e-01  
10-Jul-2017 05:30:00, 2.44e-01  
10-Jul-2017 05:45:00, 2.44e-01  
10-Jul-2017 06:00:00, 2.44e-01  
10-Jul-2017 06:15:00, 2.44e-01  
10-Jul-2017 06:30:00, 2.44e-01  
10-Jul-2017 06:45:00, 2.44e-01  
10-Jul-2017 07:00:00, 2.44e-01  
10-Jul-2017 07:15:00, 2.44e-01  
10-Jul-2017 07:30:00, 2.44e-01  
10-Jul-2017 07:45:00, 2.43e-01  
10-Jul-2017 08:00:00, 2.43e-01  
10-Jul-2017 08:15:00, 2.43e-01  
10-Jul-2017 08:30:00, 2.43e-01  
10-Jul-2017 08:45:00, 2.43e-01  
10-Jul-2017 09:00:00, 2.43e-01  
10-Jul-2017 09:15:00, 2.43e-01  
10-Jul-2017 09:30:00, 2.43e-01  
10-Jul-2017 09:45:00, 2.43e-01  
10-Jul-2017 10:00:00, 2.43e-01  
10-Jul-2017 10:15:00, 2.43e-01  
10-Jul-2017 10:30:00, 2.43e-01  
10-Jul-2017 10:45:00, 2.43e-01  
10-Jul-2017 11:00:00, 2.42e-01  
10-Jul-2017 11:15:00, 2.42e-01  
10-Jul-2017 11:30:00, 2.42e-01  
10-Jul-2017 11:45:00, 2.42e-01  
10-Jul-2017 12:00:00, 2.42e-01  
10-Jul-2017 12:15:00, 2.42e-01  
10-Jul-2017 12:30:00, 2.42e-01  
10-Jul-2017 12:45:00, 2.42e-01  
10-Jul-2017 13:00:00, 2.42e-01  
10-Jul-2017 13:15:00, 2.42e-01  
10-Jul-2017 13:30:00, 2.42e-01  
10-Jul-2017 13:45:00, 2.42e-01  
10-Jul-2017 14:00:00, 2.42e-01  
10-Jul-2017 14:15:00, 2.42e-01  
10-Jul-2017 14:30:00, 2.42e-01  
10-Jul-2017 14:45:00, 2.42e-01  
10-Jul-2017 15:00:00, 2.42e-01  
10-Jul-2017 15:15:00, 2.41e-01  
10-Jul-2017 15:30:00, 2.42e-01  
10-Jul-2017 15:45:00, 2.42e-01  
10-Jul-2017 16:00:00, 2.41e-01  
10-Jul-2017 16:15:00, 2.41e-01  
10-Jul-2017 16:30:00, 2.41e-01  
10-Jul-2017 16:45:00, 2.41e-01  
10-Jul-2017 17:00:00, 2.41e-01  
10-Jul-2017 17:15:00, 2.41e-01  
10-Jul-2017 17:30:00, 2.41e-01

10-Jul-2017 17:45:00, 2.41e-01  
10-Jul-2017 18:00:00, 2.41e-01  
10-Jul-2017 18:15:00, 2.41e-01  
10-Jul-2017 18:30:00, 2.41e-01  
10-Jul-2017 18:45:00, 2.41e-01  
10-Jul-2017 19:00:00, 2.41e-01  
10-Jul-2017 19:15:00, 2.41e-01  
10-Jul-2017 19:30:00, 2.41e-01  
10-Jul-2017 19:45:00, 2.41e-01  
10-Jul-2017 20:00:00, 2.41e-01  
10-Jul-2017 20:15:00, 2.41e-01  
10-Jul-2017 20:30:00, 2.41e-01  
10-Jul-2017 20:45:00, 2.41e-01  
10-Jul-2017 21:00:00, 2.41e-01  
10-Jul-2017 21:15:00, 2.41e-01  
10-Jul-2017 21:30:00, 2.41e-01  
10-Jul-2017 21:45:00, 2.41e-01  
10-Jul-2017 22:00:00, 2.41e-01  
10-Jul-2017 22:15:00, 2.41e-01  
10-Jul-2017 22:30:00, 2.41e-01  
10-Jul-2017 22:45:00, 2.41e-01  
10-Jul-2017 23:00:00, 2.41e-01  
10-Jul-2017 23:15:00, 2.41e-01  
10-Jul-2017 23:30:00, 2.41e-01  
10-Jul-2017 23:45:00, 2.41e-01  
11-Jul-2017, 2.41e-01  
11-Jul-2017 00:15:00, 2.41e-01  
11-Jul-2017 00:30:00, 2.41e-01  
11-Jul-2017 00:45:00, 2.41e-01  
11-Jul-2017 01:00:00, 2.41e-01  
11-Jul-2017 01:15:00, 2.41e-01  
11-Jul-2017 01:30:00, 2.41e-01  
11-Jul-2017 01:45:00, 2.41e-01  
11-Jul-2017 02:00:00, 2.41e-01  
11-Jul-2017 02:15:00, 2.41e-01  
11-Jul-2017 02:30:00, 2.41e-01  
11-Jul-2017 02:45:00, 2.41e-01  
11-Jul-2017 03:00:00, 2.41e-01  
11-Jul-2017 03:15:00, 2.41e-01  
11-Jul-2017 03:30:00, 2.41e-01  
11-Jul-2017 03:45:00, 2.41e-01  
11-Jul-2017 04:00:00, 2.41e-01  
11-Jul-2017 04:15:00, 2.41e-01  
11-Jul-2017 04:30:00, 2.41e-01  
11-Jul-2017 04:45:00, 2.41e-01  
11-Jul-2017 05:00:00, 2.41e-01  
11-Jul-2017 05:15:00, 2.41e-01  
11-Jul-2017 05:30:00, 2.41e-01  
11-Jul-2017 05:45:00, 2.41e-01  
11-Jul-2017 06:00:00, 2.41e-01  
11-Jul-2017 06:15:00, 2.41e-01  
11-Jul-2017 06:30:00, 2.41e-01  
11-Jul-2017 06:45:00, 2.41e-01  
11-Jul-2017 07:00:00, 2.41e-01  
11-Jul-2017 07:15:00, 2.40e-01  
11-Jul-2017 07:30:00, 2.40e-01  
11-Jul-2017 07:45:00, 2.40e-01  
11-Jul-2017 08:00:00, 2.40e-01  
11-Jul-2017 08:15:00, 2.40e-01  
11-Jul-2017 08:30:00, 2.40e-01  
11-Jul-2017 08:45:00, 2.40e-01  
11-Jul-2017 09:00:00, 2.40e-01  
11-Jul-2017 09:15:00, 2.40e-01  
11-Jul-2017 09:30:00, 2.40e-01

11-Jul-2017 09:45:00, 2.40e-01  
11-Jul-2017 10:00:00, 2.40e-01  
11-Jul-2017 10:15:00, 2.40e-01  
11-Jul-2017 10:30:00, 2.40e-01  
11-Jul-2017 10:45:00, 2.40e-01  
11-Jul-2017 11:00:00, 2.39e-01  
11-Jul-2017 11:15:00, 2.39e-01  
11-Jul-2017 11:30:00, 2.39e-01  
11-Jul-2017 11:45:00, 2.39e-01  
11-Jul-2017 12:00:00, 2.39e-01  
11-Jul-2017 12:15:00, 2.39e-01  
11-Jul-2017 12:30:00, 2.39e-01  
11-Jul-2017 12:45:00, 2.39e-01  
11-Jul-2017 13:00:00, 2.39e-01  
11-Jul-2017 13:15:00, 2.39e-01  
11-Jul-2017 13:30:00, 2.39e-01  
11-Jul-2017 13:45:00, 2.39e-01  
11-Jul-2017 14:00:00, 2.39e-01  
11-Jul-2017 14:15:00, 2.39e-01  
11-Jul-2017 14:30:00, 2.39e-01  
11-Jul-2017 14:45:00, 2.39e-01  
11-Jul-2017 15:00:00, 2.39e-01  
11-Jul-2017 15:15:00, 2.39e-01  
11-Jul-2017 15:30:00, 2.39e-01  
11-Jul-2017 15:45:00, 2.39e-01  
11-Jul-2017 16:00:00, 2.39e-01  
11-Jul-2017 16:15:00, 2.39e-01  
11-Jul-2017 16:30:00, 2.39e-01  
11-Jul-2017 16:45:00, 2.38e-01  
11-Jul-2017 17:00:00, 2.38e-01  
11-Jul-2017 17:15:00, 2.38e-01  
11-Jul-2017 17:30:00, 2.38e-01  
11-Jul-2017 17:45:00, 2.38e-01  
11-Jul-2017 18:00:00, 2.38e-01  
11-Jul-2017 18:15:00, 2.38e-01  
11-Jul-2017 18:30:00, 2.38e-01  
11-Jul-2017 18:45:00, 2.38e-01  
11-Jul-2017 19:00:00, 2.38e-01  
11-Jul-2017 19:15:00, 2.38e-01  
11-Jul-2017 19:30:00, 2.38e-01  
11-Jul-2017 19:45:00, 2.38e-01  
11-Jul-2017 20:00:00, 2.38e-01  
11-Jul-2017 20:15:00, 2.38e-01  
11-Jul-2017 20:30:00, 2.38e-01  
11-Jul-2017 20:45:00, 2.38e-01  
11-Jul-2017 21:00:00, 2.38e-01  
11-Jul-2017 21:15:00, 2.38e-01  
11-Jul-2017 21:30:00, 2.38e-01  
11-Jul-2017 21:45:00, 2.38e-01  
11-Jul-2017 22:00:00, 2.38e-01  
11-Jul-2017 22:15:00, 2.38e-01  
11-Jul-2017 22:30:00, 2.38e-01  
11-Jul-2017 22:45:00, 2.38e-01  
11-Jul-2017 23:00:00, 2.38e-01  
11-Jul-2017 23:15:00, 2.38e-01  
11-Jul-2017 23:30:00, 2.38e-01  
11-Jul-2017 23:45:00, 2.38e-01  
12-Jul-2017, 2.38e-01  
12-Jul-2017 00:15:00, 2.38e-01  
12-Jul-2017 00:30:00, 2.38e-01  
12-Jul-2017 00:45:00, 2.38e-01  
12-Jul-2017 01:00:00, 2.38e-01  
12-Jul-2017 01:15:00, 2.38e-01  
12-Jul-2017 01:30:00, 2.37e-01

12-Jul-2017 01:45:00, 2.37e-01  
12-Jul-2017 02:00:00, 2.38e-01  
12-Jul-2017 02:15:00, 2.37e-01  
12-Jul-2017 02:30:00, 2.37e-01  
12-Jul-2017 02:45:00, 2.37e-01  
12-Jul-2017 03:00:00, 2.37e-01  
12-Jul-2017 03:15:00, 2.37e-01  
12-Jul-2017 03:30:00, 2.37e-01  
12-Jul-2017 03:45:00, 2.37e-01  
12-Jul-2017 04:00:00, 2.37e-01  
12-Jul-2017 04:15:00, 2.37e-01  
12-Jul-2017 04:30:00, 2.37e-01  
12-Jul-2017 04:45:00, 2.37e-01  
12-Jul-2017 05:00:00, 2.37e-01  
12-Jul-2017 05:15:00, 2.37e-01  
12-Jul-2017 05:30:00, 2.37e-01  
12-Jul-2017 05:45:00, 2.37e-01  
12-Jul-2017 06:00:00, 2.37e-01  
12-Jul-2017 06:15:00, 2.37e-01  
12-Jul-2017 06:30:00, 2.37e-01  
12-Jul-2017 06:45:00, 2.37e-01  
12-Jul-2017 07:00:00, 2.37e-01  
12-Jul-2017 07:15:00, 2.37e-01  
12-Jul-2017 07:30:00, 2.37e-01  
12-Jul-2017 07:45:00, 2.37e-01  
12-Jul-2017 08:00:00, 2.37e-01  
12-Jul-2017 08:15:00, 2.37e-01  
12-Jul-2017 08:30:00, 2.37e-01  
12-Jul-2017 08:45:00, 2.37e-01  
12-Jul-2017 09:00:00, 2.37e-01  
12-Jul-2017 09:15:00, 2.36e-01  
12-Jul-2017 09:30:00, 2.37e-01  
12-Jul-2017 09:45:00, 2.36e-01  
12-Jul-2017 10:00:00, 2.36e-01  
12-Jul-2017 10:15:00, 2.36e-01  
12-Jul-2017 10:30:00, 2.36e-01  
12-Jul-2017 10:45:00, 2.36e-01  
12-Jul-2017 11:00:00, 2.36e-01  
12-Jul-2017 11:15:00, 2.36e-01  
12-Jul-2017 11:30:00, 2.36e-01  
12-Jul-2017 11:45:00, 2.36e-01  
12-Jul-2017 12:00:00, 2.36e-01  
12-Jul-2017 12:15:00, 2.36e-01  
12-Jul-2017 12:30:00, 2.36e-01  
12-Jul-2017 12:45:00, 2.36e-01  
12-Jul-2017 13:00:00, 2.36e-01  
12-Jul-2017 13:15:00, 2.36e-01  
12-Jul-2017 13:30:00, 2.36e-01  
12-Jul-2017 13:45:00, 2.36e-01  
12-Jul-2017 14:00:00, 2.36e-01  
12-Jul-2017 14:15:00, 2.36e-01  
12-Jul-2017 14:30:00, 2.36e-01  
12-Jul-2017 14:45:00, 2.35e-01  
12-Jul-2017 15:00:00, 2.35e-01  
12-Jul-2017 15:15:00, 2.35e-01  
12-Jul-2017 15:30:00, 2.35e-01  
12-Jul-2017 15:45:00, 2.35e-01  
12-Jul-2017 16:00:00, 2.35e-01  
12-Jul-2017 16:15:00, 2.35e-01  
12-Jul-2017 16:30:00, 2.35e-01  
12-Jul-2017 16:45:00, 2.34e-01  
12-Jul-2017 17:00:00, 2.33e-01  
12-Jul-2017 17:15:00, 2.33e-01  
12-Jul-2017 17:30:00, 2.33e-01

12-Jul-2017 17:45:00, 2.33e-01  
12-Jul-2017 18:00:00, 2.33e-01  
12-Jul-2017 18:15:00, 2.33e-01  
12-Jul-2017 18:30:00, 2.33e-01  
12-Jul-2017 18:45:00, 2.33e-01  
12-Jul-2017 19:00:00, 2.33e-01  
12-Jul-2017 19:15:00, 2.33e-01  
12-Jul-2017 19:30:00, 2.33e-01  
12-Jul-2017 19:45:00, 2.33e-01  
12-Jul-2017 20:00:00, 2.33e-01  
12-Jul-2017 20:15:00, 2.33e-01  
12-Jul-2017 20:30:00, 2.33e-01  
12-Jul-2017 20:45:00, 2.33e-01  
12-Jul-2017 21:00:00, 2.33e-01  
12-Jul-2017 21:15:00, 2.33e-01  
12-Jul-2017 21:30:00, 2.33e-01  
12-Jul-2017 21:45:00, 2.33e-01  
12-Jul-2017 22:00:00, 2.33e-01  
12-Jul-2017 22:15:00, 2.33e-01  
12-Jul-2017 22:30:00, 2.33e-01  
12-Jul-2017 22:45:00, 2.33e-01  
12-Jul-2017 23:00:00, 2.33e-01  
12-Jul-2017 23:15:00, 2.33e-01  
12-Jul-2017 23:30:00, 2.33e-01  
12-Jul-2017 23:45:00, 2.33e-01  
13-Jul-2017, 2.33e-01  
13-Jul-2017 00:15:00, 2.33e-01  
13-Jul-2017 00:30:00, 2.33e-01  
13-Jul-2017 00:45:00, 2.33e-01  
13-Jul-2017 01:00:00, 2.33e-01  
13-Jul-2017 01:15:00, 2.33e-01  
13-Jul-2017 01:30:00, 2.33e-01  
13-Jul-2017 01:45:00, 2.33e-01  
13-Jul-2017 02:00:00, 2.33e-01  
13-Jul-2017 02:15:00, 2.33e-01  
13-Jul-2017 02:30:00, 2.33e-01  
13-Jul-2017 02:45:00, 2.33e-01  
13-Jul-2017 03:00:00, 2.33e-01  
13-Jul-2017 03:15:00, 2.33e-01  
13-Jul-2017 03:30:00, 2.33e-01  
13-Jul-2017 03:45:00, 2.33e-01  
13-Jul-2017 04:00:00, 2.33e-01  
13-Jul-2017 04:15:00, 2.33e-01  
13-Jul-2017 04:30:00, 2.33e-01  
13-Jul-2017 04:45:00, 2.33e-01  
13-Jul-2017 05:00:00, 2.33e-01  
13-Jul-2017 05:15:00, 2.33e-01  
13-Jul-2017 05:30:00, 2.33e-01  
13-Jul-2017 05:45:00, 2.33e-01  
13-Jul-2017 06:00:00, 2.33e-01  
13-Jul-2017 06:15:00, 2.33e-01  
13-Jul-2017 06:30:00, 2.33e-01  
13-Jul-2017 06:45:00, 2.33e-01  
13-Jul-2017 07:00:00, 2.33e-01  
13-Jul-2017 07:15:00, 2.33e-01  
13-Jul-2017 07:30:00, 2.33e-01  
13-Jul-2017 07:45:00, 2.33e-01  
13-Jul-2017 08:00:00, 2.33e-01  
13-Jul-2017 08:15:00, 2.32e-01  
13-Jul-2017 08:30:00, 2.32e-01  
13-Jul-2017 08:45:00, 2.32e-01  
13-Jul-2017 09:00:00, 2.32e-01  
13-Jul-2017 09:15:00, 2.32e-01  
13-Jul-2017 09:30:00, 2.32e-01



13-Jul-2017 09:45:00, 2.32e-01  
13-Jul-2017 10:00:00, 2.32e-01  
13-Jul-2017 10:15:00, 2.32e-01  
13-Jul-2017 10:30:00, 2.32e-01  
13-Jul-2017 10:45:00, 2.32e-01  
13-Jul-2017 11:00:00, 2.32e-01  
13-Jul-2017 11:15:00, 2.32e-01  
13-Jul-2017 11:30:00, 2.32e-01  
13-Jul-2017 11:45:00, 2.32e-01  
13-Jul-2017 12:00:00, 2.32e-01  
13-Jul-2017 12:15:00, 2.32e-01  
13-Jul-2017 12:30:00, 2.32e-01  
13-Jul-2017 12:45:00, 2.32e-01  
13-Jul-2017 13:00:00, 2.32e-01  
13-Jul-2017 13:15:00, 2.32e-01  
13-Jul-2017 13:30:00, 2.32e-01  
13-Jul-2017 13:45:00, 2.32e-01  
13-Jul-2017 14:00:00, 2.32e-01  
13-Jul-2017 14:15:00, 2.32e-01  
13-Jul-2017 14:30:00, 2.32e-01  
13-Jul-2017 14:45:00, 2.31e-01  
13-Jul-2017 15:00:00, 2.31e-01  
13-Jul-2017 15:15:00, 2.31e-01  
13-Jul-2017 15:30:00, 2.31e-01  
13-Jul-2017 15:45:00, 2.31e-01  
13-Jul-2017 16:00:00, 2.31e-01  
13-Jul-2017 16:15:00, 2.31e-01  
13-Jul-2017 16:30:00, 2.31e-01  
13-Jul-2017 16:45:00, 2.31e-01  
13-Jul-2017 17:00:00, 2.31e-01  
13-Jul-2017 17:15:00, 2.31e-01  
13-Jul-2017 17:30:00, 2.31e-01  
13-Jul-2017 17:45:00, 2.31e-01  
13-Jul-2017 18:00:00, 2.31e-01  
13-Jul-2017 18:15:00, 2.31e-01  
13-Jul-2017 18:30:00, 2.31e-01  
13-Jul-2017 18:45:00, 2.31e-01  
13-Jul-2017 19:00:00, 2.31e-01  
13-Jul-2017 19:15:00, 2.31e-01  
13-Jul-2017 19:30:00, 2.31e-01  
13-Jul-2017 19:45:00, 2.31e-01  
13-Jul-2017 20:00:00, 2.31e-01  
13-Jul-2017 20:15:00, 2.31e-01  
13-Jul-2017 20:30:00, 2.31e-01  
13-Jul-2017 20:45:00, 2.31e-01  
13-Jul-2017 21:00:00, 2.31e-01  
13-Jul-2017 21:15:00, 2.31e-01  
13-Jul-2017 21:30:00, 2.31e-01  
13-Jul-2017 21:45:00, 2.31e-01  
13-Jul-2017 22:00:00, 2.31e-01  
13-Jul-2017 22:15:00, 2.31e-01  
13-Jul-2017 22:30:00, 2.31e-01  
13-Jul-2017 22:45:00, 2.32e-01  
13-Jul-2017 23:00:00, 2.31e-01  
13-Jul-2017 23:15:00, 2.31e-01  
13-Jul-2017 23:30:00, 2.31e-01  
13-Jul-2017 23:45:00, 2.31e-01  
14-Jul-2017, 2.31e-01  
14-Jul-2017 00:15:00, 2.31e-01  
14-Jul-2017 00:30:00, 2.31e-01  
14-Jul-2017 00:45:00, 2.31e-01  
14-Jul-2017 01:00:00, 2.31e-01  
14-Jul-2017 01:15:00, 2.31e-01  
14-Jul-2017 01:30:00, 2.31e-01

14-Jul-2017 01:45:00, 2.31e-01  
14-Jul-2017 02:00:00, 2.31e-01  
14-Jul-2017 02:15:00, 2.31e-01  
14-Jul-2017 02:30:00, 2.31e-01  
14-Jul-2017 02:45:00, 2.31e-01  
14-Jul-2017 03:00:00, 2.31e-01  
14-Jul-2017 03:15:00, 2.31e-01  
14-Jul-2017 03:30:00, 2.31e-01  
14-Jul-2017 03:45:00, 2.31e-01  
14-Jul-2017 04:00:00, 2.31e-01  
14-Jul-2017 04:15:00, 2.31e-01  
14-Jul-2017 04:30:00, 2.31e-01  
14-Jul-2017 04:45:00, 2.31e-01  
14-Jul-2017 05:00:00, 2.31e-01  
14-Jul-2017 05:15:00, 2.31e-01  
14-Jul-2017 05:30:00, 2.31e-01  
14-Jul-2017 05:45:00, 2.31e-01  
14-Jul-2017 06:00:00, 2.31e-01  
14-Jul-2017 06:15:00, 2.31e-01  
14-Jul-2017 06:30:00, 2.31e-01  
14-Jul-2017 06:45:00, 2.31e-01  
14-Jul-2017 07:00:00, 2.31e-01  
14-Jul-2017 07:15:00, 2.31e-01  
14-Jul-2017 07:30:00, 2.31e-01  
14-Jul-2017 07:45:00, 2.31e-01  
14-Jul-2017 08:00:00, 2.31e-01  
14-Jul-2017 08:15:00, 2.30e-01  
14-Jul-2017 08:30:00, 2.30e-01  
14-Jul-2017 08:45:00, 2.30e-01  
14-Jul-2017 09:00:00, 2.30e-01  
14-Jul-2017 09:15:00, 2.30e-01  
14-Jul-2017 09:30:00, 2.30e-01  
14-Jul-2017 09:45:00, 2.30e-01  
14-Jul-2017 10:00:00, 2.30e-01  
14-Jul-2017 10:15:00, 2.30e-01  
14-Jul-2017 10:30:00, 2.30e-01  
14-Jul-2017 10:45:00, 2.30e-01  
14-Jul-2017 11:00:00, 2.30e-01  
14-Jul-2017 11:15:00, 2.30e-01  
14-Jul-2017 11:30:00, 2.30e-01  
14-Jul-2017 11:45:00, 2.30e-01  
14-Jul-2017 12:00:00, 2.30e-01  
14-Jul-2017 12:15:00, 2.29e-01  
14-Jul-2017 12:30:00, 2.30e-01  
14-Jul-2017 12:45:00, 2.29e-01  
14-Jul-2017 13:00:00, 2.29e-01  
14-Jul-2017 13:15:00, 2.28e-01  
14-Jul-2017 13:30:00, 2.28e-01  
14-Jul-2017 13:45:00, 2.28e-01  
14-Jul-2017 14:00:00, 2.29e-01  
14-Jul-2017 14:15:00, 2.29e-01  
14-Jul-2017 14:30:00, 2.29e-01  
14-Jul-2017 14:45:00, 2.29e-01  
14-Jul-2017 15:00:00, 2.29e-01  
14-Jul-2017 15:15:00, 2.29e-01  
14-Jul-2017 15:30:00, 2.29e-01  
14-Jul-2017 15:45:00, 2.29e-01  
14-Jul-2017 16:00:00, 2.29e-01  
14-Jul-2017 16:15:00, 2.29e-01  
14-Jul-2017 16:30:00, 2.29e-01  
14-Jul-2017 16:45:00, 2.29e-01  
14-Jul-2017 17:00:00, 2.29e-01  
14-Jul-2017 17:15:00, 2.29e-01  
14-Jul-2017 17:30:00, 2.29e-01

14-Jul-2017 17:45:00, 2.29e-01  
14-Jul-2017 18:00:00, 2.29e-01  
14-Jul-2017 18:15:00, 2.29e-01  
14-Jul-2017 18:30:00, 2.29e-01  
14-Jul-2017 18:45:00, 2.29e-01  
14-Jul-2017 19:00:00, 2.29e-01  
14-Jul-2017 19:15:00, 2.29e-01  
14-Jul-2017 19:30:00, 2.29e-01  
14-Jul-2017 19:45:00, 2.29e-01  
14-Jul-2017 20:00:00, 2.29e-01  
14-Jul-2017 20:15:00, 2.29e-01  
14-Jul-2017 20:30:00, 2.29e-01  
14-Jul-2017 20:45:00, 2.29e-01  
14-Jul-2017 21:00:00, 2.29e-01  
14-Jul-2017 21:15:00, 2.29e-01  
14-Jul-2017 21:30:00, 2.29e-01  
14-Jul-2017 21:45:00, 2.29e-01  
14-Jul-2017 22:00:00, 2.29e-01  
14-Jul-2017 22:15:00, 2.29e-01  
14-Jul-2017 22:30:00, 2.29e-01  
14-Jul-2017 22:45:00, 2.29e-01  
14-Jul-2017 23:00:00, 2.29e-01  
14-Jul-2017 23:15:00, 2.29e-01  
14-Jul-2017 23:30:00, 2.29e-01  
14-Jul-2017 23:45:00, 2.29e-01  
15-Jul-2017, 2.29e-01  
15-Jul-2017 00:15:00, 2.29e-01  
15-Jul-2017 00:30:00, 2.29e-01  
15-Jul-2017 00:45:00, 2.29e-01  
15-Jul-2017 01:00:00, 2.29e-01  
15-Jul-2017 01:15:00, 2.29e-01  
15-Jul-2017 01:30:00, 2.29e-01  
15-Jul-2017 01:45:00, 2.29e-01  
15-Jul-2017 02:00:00, 2.29e-01  
15-Jul-2017 02:15:00, 2.29e-01  
15-Jul-2017 02:30:00, 2.29e-01  
15-Jul-2017 02:45:00, 2.29e-01  
15-Jul-2017 03:00:00, 2.29e-01  
15-Jul-2017 03:15:00, 2.29e-01  
15-Jul-2017 03:30:00, 2.29e-01  
15-Jul-2017 03:45:00, 2.29e-01  
15-Jul-2017 04:00:00, 2.29e-01  
15-Jul-2017 04:15:00, 2.29e-01  
15-Jul-2017 04:30:00, 2.29e-01  
15-Jul-2017 04:45:00, 2.29e-01  
15-Jul-2017 05:00:00, 2.29e-01  
15-Jul-2017 05:15:00, 2.29e-01  
15-Jul-2017 05:30:00, 2.29e-01  
15-Jul-2017 05:45:00, 2.29e-01  
15-Jul-2017 06:00:00, 2.29e-01  
15-Jul-2017 06:15:00, 2.29e-01  
15-Jul-2017 06:30:00, 2.29e-01  
15-Jul-2017 06:45:00, 2.29e-01  
15-Jul-2017 07:00:00, 2.29e-01  
15-Jul-2017 07:15:00, 2.29e-01  
15-Jul-2017 07:30:00, 2.29e-01  
15-Jul-2017 07:45:00, 2.29e-01  
15-Jul-2017 08:00:00, 2.29e-01  
15-Jul-2017 08:15:00, 2.29e-01  
15-Jul-2017 08:30:00, 2.29e-01  
15-Jul-2017 08:45:00, 2.29e-01  
15-Jul-2017 09:00:00, 2.29e-01  
15-Jul-2017 09:15:00, 2.29e-01  
15-Jul-2017 09:30:00, 2.29e-01

15-Jul-2017 09:45:00, 2.29e-01  
15-Jul-2017 10:00:00, 2.29e-01  
15-Jul-2017 10:15:00, 2.29e-01  
15-Jul-2017 10:30:00, 2.29e-01  
15-Jul-2017 10:45:00, 2.29e-01  
15-Jul-2017 11:00:00, 2.29e-01  
15-Jul-2017 11:15:00, 2.29e-01  
15-Jul-2017 11:30:00, 2.29e-01  
15-Jul-2017 11:45:00, 2.28e-01  
15-Jul-2017 12:00:00, 2.29e-01  
15-Jul-2017 12:15:00, 2.28e-01  
15-Jul-2017 12:30:00, 2.28e-01  
15-Jul-2017 12:45:00, 2.28e-01  
15-Jul-2017 13:00:00, 2.28e-01  
15-Jul-2017 13:15:00, 2.28e-01  
15-Jul-2017 13:30:00, 2.28e-01  
15-Jul-2017 13:45:00, 2.28e-01  
15-Jul-2017 14:00:00, 2.28e-01  
15-Jul-2017 14:15:00, 2.28e-01  
15-Jul-2017 14:30:00, 2.28e-01  
15-Jul-2017 14:45:00, 2.28e-01  
15-Jul-2017 15:00:00, 2.28e-01  
15-Jul-2017 15:15:00, 2.28e-01  
15-Jul-2017 15:30:00, 2.28e-01  
15-Jul-2017 15:45:00, 2.28e-01  
15-Jul-2017 16:00:00, 2.28e-01  
15-Jul-2017 16:15:00, 2.28e-01  
15-Jul-2017 16:30:00, 2.28e-01  
15-Jul-2017 16:45:00, 2.28e-01  
15-Jul-2017 17:00:00, 2.28e-01  
15-Jul-2017 17:15:00, 2.28e-01  
15-Jul-2017 17:30:00, 2.28e-01  
15-Jul-2017 17:45:00, 2.28e-01  
15-Jul-2017 18:00:00, 2.28e-01  
15-Jul-2017 18:15:00, 2.28e-01  
15-Jul-2017 18:30:00, 2.28e-01  
15-Jul-2017 18:45:00, 2.28e-01  
15-Jul-2017 19:00:00, 2.29e-01  
15-Jul-2017 19:15:00, 2.29e-01  
15-Jul-2017 19:30:00, 2.29e-01  
15-Jul-2017 19:45:00, 2.28e-01  
15-Jul-2017 20:00:00, 2.28e-01  
15-Jul-2017 20:15:00, 2.29e-01  
15-Jul-2017 20:30:00, 2.29e-01  
15-Jul-2017 20:45:00, 2.29e-01  
15-Jul-2017 21:00:00, 2.29e-01  
15-Jul-2017 21:15:00, 2.29e-01  
15-Jul-2017 21:30:00, 2.29e-01  
15-Jul-2017 21:45:00, 2.29e-01  
15-Jul-2017 22:00:00, 2.29e-01  
15-Jul-2017 22:15:00, 2.29e-01  
15-Jul-2017 22:30:00, 2.29e-01  
15-Jul-2017 22:45:00, 2.29e-01  
15-Jul-2017 23:00:00, 2.29e-01  
15-Jul-2017 23:15:00, 2.29e-01  
15-Jul-2017 23:30:00, 2.29e-01  
15-Jul-2017 23:45:00, 2.29e-01  
16-Jul-2017, 2.29e-01  
16-Jul-2017 00:15:00, 2.29e-01  
16-Jul-2017 00:30:00, 2.29e-01  
16-Jul-2017 00:45:00, 2.29e-01  
16-Jul-2017 01:00:00, 2.29e-01  
16-Jul-2017 01:15:00, 2.29e-01  
16-Jul-2017 01:30:00, 2.29e-01

16-Jul-2017 01:45:00, 2.29e-01  
16-Jul-2017 02:00:00, 2.29e-01  
16-Jul-2017 02:15:00, 2.29e-01  
16-Jul-2017 02:30:00, 2.29e-01  
16-Jul-2017 02:45:00, 2.29e-01  
16-Jul-2017 03:00:00, 2.29e-01  
16-Jul-2017 03:15:00, 2.29e-01  
16-Jul-2017 03:30:00, 2.29e-01  
16-Jul-2017 03:45:00, 2.29e-01  
16-Jul-2017 04:00:00, 2.29e-01  
16-Jul-2017 04:15:00, 2.29e-01  
16-Jul-2017 04:30:00, 2.29e-01  
16-Jul-2017 04:45:00, 2.29e-01  
16-Jul-2017 05:00:00, 2.29e-01  
16-Jul-2017 05:15:00, 2.29e-01  
16-Jul-2017 05:30:00, 2.29e-01  
16-Jul-2017 05:45:00, 2.29e-01  
16-Jul-2017 06:00:00, 2.29e-01  
16-Jul-2017 06:15:00, 2.29e-01  
16-Jul-2017 06:30:00, 2.29e-01  
16-Jul-2017 06:45:00, 2.29e-01  
16-Jul-2017 07:00:00, 2.29e-01  
16-Jul-2017 07:15:00, 2.29e-01  
16-Jul-2017 07:30:00, 2.29e-01  
16-Jul-2017 07:45:00, 2.29e-01  
16-Jul-2017 08:00:00, 2.29e-01  
16-Jul-2017 08:15:00, 2.29e-01  
16-Jul-2017 08:30:00, 2.29e-01  
16-Jul-2017 08:45:00, 2.29e-01  
16-Jul-2017 09:00:00, 2.29e-01  
16-Jul-2017 09:15:00, 2.29e-01  
16-Jul-2017 09:30:00, 2.29e-01  
16-Jul-2017 09:45:00, 2.29e-01  
16-Jul-2017 10:00:00, 2.28e-01  
16-Jul-2017 10:15:00, 2.28e-01  
16-Jul-2017 10:30:00, 2.28e-01  
16-Jul-2017 10:45:00, 2.28e-01  
16-Jul-2017 11:00:00, 2.28e-01  
16-Jul-2017 11:15:00, 2.28e-01  
16-Jul-2017 11:30:00, 2.28e-01  
16-Jul-2017 11:45:00, 2.28e-01  
16-Jul-2017 12:00:00, 2.28e-01  
16-Jul-2017 12:15:00, 2.28e-01  
16-Jul-2017 12:30:00, 2.28e-01  
16-Jul-2017 12:45:00, 2.28e-01  
16-Jul-2017 13:00:00, 2.28e-01  
16-Jul-2017 13:15:00, 2.28e-01  
16-Jul-2017 13:30:00, 2.28e-01  
16-Jul-2017 13:45:00, 2.28e-01  
16-Jul-2017 14:00:00, 2.28e-01  
16-Jul-2017 14:15:00, 2.28e-01  
16-Jul-2017 14:30:00, 2.28e-01  
16-Jul-2017 14:45:00, 2.28e-01  
16-Jul-2017 15:00:00, 2.28e-01  
16-Jul-2017 15:15:00, 2.28e-01  
16-Jul-2017 15:30:00, 2.28e-01  
16-Jul-2017 15:45:00, 2.28e-01  
16-Jul-2017 16:00:00, 2.28e-01  
16-Jul-2017 16:15:00, 2.28e-01  
16-Jul-2017 16:30:00, 2.28e-01  
16-Jul-2017 16:45:00, 2.28e-01  
16-Jul-2017 17:00:00, 2.28e-01  
16-Jul-2017 17:15:00, 2.28e-01  
16-Jul-2017 17:30:00, 2.28e-01

16-Jul-2017 17:45:00, 2.28e-01  
16-Jul-2017 18:00:00, 2.28e-01  
16-Jul-2017 18:15:00, 2.28e-01  
16-Jul-2017 18:30:00, 2.28e-01  
16-Jul-2017 18:45:00, 2.28e-01  
16-Jul-2017 19:00:00, 2.28e-01  
16-Jul-2017 19:15:00, 2.28e-01  
16-Jul-2017 19:30:00, 2.28e-01  
16-Jul-2017 19:45:00, 2.28e-01  
16-Jul-2017 20:00:00, 2.28e-01  
16-Jul-2017 20:15:00, 2.28e-01  
16-Jul-2017 20:30:00, 2.28e-01  
16-Jul-2017 20:45:00, 2.28e-01  
16-Jul-2017 21:00:00, 2.28e-01  
16-Jul-2017 21:15:00, 2.28e-01  
16-Jul-2017 21:30:00, 2.28e-01  
16-Jul-2017 21:45:00, 2.28e-01  
16-Jul-2017 22:00:00, 2.28e-01  
16-Jul-2017 22:15:00, 2.28e-01  
16-Jul-2017 22:30:00, 2.28e-01  
16-Jul-2017 22:45:00, 2.28e-01  
16-Jul-2017 23:00:00, 2.28e-01  
16-Jul-2017 23:15:00, 2.28e-01  
16-Jul-2017 23:30:00, 2.28e-01  
16-Jul-2017 23:45:00, 2.28e-01  
17-Jul-2017, 2.28e-01  
17-Jul-2017 00:15:00, 2.28e-01  
17-Jul-2017 00:30:00, 2.28e-01  
17-Jul-2017 00:45:00, 2.28e-01  
17-Jul-2017 01:00:00, 2.28e-01  
17-Jul-2017 01:15:00, 2.28e-01  
17-Jul-2017 01:30:00, 2.28e-01  
17-Jul-2017 01:45:00, 2.28e-01  
17-Jul-2017 02:00:00, 2.28e-01  
17-Jul-2017 02:15:00, 2.29e-01  
17-Jul-2017 02:30:00, 2.28e-01  
17-Jul-2017 02:45:00, 2.28e-01  
17-Jul-2017 03:00:00, 2.29e-01  
17-Jul-2017 03:15:00, 2.28e-01  
17-Jul-2017 03:30:00, 2.28e-01  
17-Jul-2017 03:45:00, 2.28e-01  
17-Jul-2017 04:00:00, 2.28e-01  
17-Jul-2017 04:15:00, 2.28e-01  
17-Jul-2017 04:30:00, 2.28e-01  
17-Jul-2017 04:45:00, 2.28e-01  
17-Jul-2017 05:00:00, 2.28e-01  
17-Jul-2017 05:15:00, 2.28e-01  
17-Jul-2017 05:30:00, 2.28e-01  
17-Jul-2017 05:45:00, 2.28e-01  
17-Jul-2017 06:00:00, 2.28e-01  
17-Jul-2017 06:15:00, 2.28e-01  
17-Jul-2017 06:30:00, 2.28e-01  
17-Jul-2017 06:45:00, 2.28e-01  
17-Jul-2017 07:00:00, 2.28e-01  
17-Jul-2017 07:15:00, 2.28e-01  
17-Jul-2017 07:30:00, 2.28e-01  
17-Jul-2017 07:45:00, 2.28e-01  
17-Jul-2017 08:00:00, 2.28e-01  
17-Jul-2017 08:15:00, 2.28e-01  
17-Jul-2017 08:30:00, 2.28e-01  
17-Jul-2017 08:45:00, 2.28e-01  
17-Jul-2017 09:00:00, 2.28e-01  
17-Jul-2017 09:15:00, 2.28e-01  
17-Jul-2017 09:30:00, 2.28e-01

17-Jul-2017 09:45:00, 2.28e-01  
17-Jul-2017 10:00:00, 2.28e-01  
17-Jul-2017 10:15:00, 2.28e-01  
17-Jul-2017 10:30:00, 2.28e-01  
17-Jul-2017 10:45:00, 2.28e-01  
17-Jul-2017 11:00:00, 2.28e-01  
17-Jul-2017 11:15:00, 2.28e-01  
17-Jul-2017 11:30:00, 2.28e-01  
17-Jul-2017 11:45:00, 2.28e-01  
17-Jul-2017 12:00:00, 2.27e-01  
17-Jul-2017 12:15:00, 2.28e-01  
17-Jul-2017 12:30:00, 2.27e-01  
17-Jul-2017 12:45:00, 2.27e-01  
17-Jul-2017 13:00:00, 2.27e-01  
17-Jul-2017 13:15:00, 2.27e-01  
17-Jul-2017 13:30:00, 2.27e-01  
17-Jul-2017 13:45:00, 2.27e-01  
17-Jul-2017 14:00:00, 2.27e-01  
17-Jul-2017 14:15:00, 2.27e-01  
17-Jul-2017 14:30:00, 2.27e-01  
17-Jul-2017 14:45:00, 2.27e-01  
17-Jul-2017 15:00:00, 2.27e-01  
17-Jul-2017 15:15:00, 2.27e-01  
17-Jul-2017 15:30:00, 2.27e-01  
17-Jul-2017 15:45:00, 2.27e-01  
17-Jul-2017 16:00:00, 2.27e-01  
17-Jul-2017 16:15:00, 2.27e-01  
17-Jul-2017 16:30:00, 2.27e-01  
17-Jul-2017 16:45:00, 2.27e-01  
17-Jul-2017 17:00:00, 2.27e-01  
17-Jul-2017 17:15:00, 2.27e-01  
17-Jul-2017 17:30:00, 2.27e-01  
17-Jul-2017 17:45:00, 2.27e-01  
17-Jul-2017 18:00:00, 2.27e-01  
17-Jul-2017 18:15:00, 2.27e-01  
17-Jul-2017 18:30:00, 2.27e-01  
17-Jul-2017 18:45:00, 2.27e-01  
17-Jul-2017 19:00:00, 2.27e-01  
17-Jul-2017 19:15:00, 2.27e-01  
17-Jul-2017 19:30:00, 2.28e-01  
17-Jul-2017 19:45:00, 2.28e-01  
17-Jul-2017 20:00:00, 2.28e-01  
17-Jul-2017 20:15:00, 2.28e-01  
17-Jul-2017 20:30:00, 2.28e-01  
17-Jul-2017 20:45:00, 2.28e-01  
17-Jul-2017 21:00:00, 2.28e-01  
17-Jul-2017 21:15:00, 2.28e-01  
17-Jul-2017 21:30:00, 2.28e-01  
17-Jul-2017 21:45:00, 2.28e-01  
17-Jul-2017 22:00:00, 2.28e-01  
17-Jul-2017 22:15:00, 2.28e-01  
17-Jul-2017 22:30:00, 2.28e-01  
17-Jul-2017 22:45:00, 2.28e-01  
17-Jul-2017 23:00:00, 2.28e-01  
17-Jul-2017 23:15:00, 2.28e-01  
17-Jul-2017 23:30:00, 2.28e-01  
17-Jul-2017 23:45:00, 2.28e-01  
18-Jul-2017, 2.28e-01  
18-Jul-2017 00:15:00, 2.28e-01  
18-Jul-2017 00:30:00, 2.28e-01  
18-Jul-2017 00:45:00, 2.28e-01  
18-Jul-2017 01:00:00, 2.28e-01  
18-Jul-2017 01:15:00, 2.28e-01  
18-Jul-2017 01:30:00, 2.28e-01

18-Jul-2017 01:45:00, 2.28e-01  
18-Jul-2017 02:00:00, 2.28e-01  
18-Jul-2017 02:15:00, 2.28e-01  
18-Jul-2017 02:30:00, 2.28e-01  
18-Jul-2017 02:45:00, 2.28e-01  
18-Jul-2017 03:00:00, 2.28e-01  
18-Jul-2017 03:15:00, 2.28e-01  
18-Jul-2017 03:30:00, 2.28e-01  
18-Jul-2017 03:45:00, 2.28e-01  
18-Jul-2017 04:00:00, 2.28e-01  
18-Jul-2017 04:15:00, 2.28e-01  
18-Jul-2017 04:30:00, 2.28e-01  
18-Jul-2017 04:45:00, 2.28e-01  
18-Jul-2017 05:00:00, 2.28e-01  
18-Jul-2017 05:15:00, 2.28e-01  
18-Jul-2017 05:30:00, 2.28e-01  
18-Jul-2017 05:45:00, 2.28e-01  
18-Jul-2017 06:00:00, 2.28e-01  
18-Jul-2017 06:15:00, 2.28e-01  
18-Jul-2017 06:30:00, 2.28e-01  
18-Jul-2017 06:45:00, 2.28e-01  
18-Jul-2017 07:00:00, 2.28e-01  
18-Jul-2017 07:15:00, 2.27e-01  
18-Jul-2017 07:30:00, 2.28e-01  
18-Jul-2017 07:45:00, 2.27e-01  
18-Jul-2017 08:00:00, 2.27e-01  
18-Jul-2017 08:15:00, 2.27e-01  
18-Jul-2017 08:30:00, 2.27e-01  
18-Jul-2017 08:45:00, 2.27e-01  
18-Jul-2017 09:00:00, 2.27e-01  
18-Jul-2017 09:15:00, 2.27e-01  
18-Jul-2017 09:30:00, 2.27e-01  
18-Jul-2017 09:45:00, 2.27e-01  
18-Jul-2017 10:00:00, 2.27e-01  
18-Jul-2017 10:15:00, 2.27e-01  
18-Jul-2017 10:30:00, 2.27e-01  
18-Jul-2017 10:45:00, 2.27e-01  
18-Jul-2017 11:00:00, 2.27e-01  
18-Jul-2017 11:15:00, 2.27e-01  
18-Jul-2017 11:30:00, 2.27e-01  
18-Jul-2017 11:45:00, 2.27e-01  
18-Jul-2017 12:00:00, 2.27e-01  
18-Jul-2017 12:15:00, 2.27e-01  
18-Jul-2017 12:30:00, 2.27e-01  
18-Jul-2017 12:45:00, 2.27e-01  
18-Jul-2017 13:00:00, 2.27e-01  
18-Jul-2017 13:15:00, 2.27e-01  
18-Jul-2017 13:30:00, 2.27e-01  
18-Jul-2017 13:45:00, 2.27e-01  
18-Jul-2017 14:00:00, 2.27e-01  
18-Jul-2017 14:15:00, 2.27e-01  
18-Jul-2017 14:30:00, 2.27e-01  
18-Jul-2017 14:45:00, 2.27e-01  
18-Jul-2017 15:00:00, 2.27e-01  
18-Jul-2017 15:15:00, 2.27e-01  
18-Jul-2017 15:30:00, 2.27e-01  
18-Jul-2017 15:45:00, 2.27e-01  
18-Jul-2017 16:00:00, 2.27e-01  
18-Jul-2017 16:15:00, 2.27e-01  
18-Jul-2017 16:30:00, 2.27e-01  
18-Jul-2017 16:45:00, 2.27e-01  
18-Jul-2017 17:00:00, 2.27e-01  
18-Jul-2017 17:15:00, 2.27e-01  
18-Jul-2017 17:30:00, 2.27e-01



18-Jul-2017 17:45:00, 2.27e-01  
18-Jul-2017 18:00:00, 2.27e-01  
18-Jul-2017 18:15:00, 2.27e-01  
18-Jul-2017 18:30:00, 2.27e-01  
18-Jul-2017 18:45:00, 2.27e-01  
18-Jul-2017 19:00:00, 2.27e-01  
18-Jul-2017 19:15:00, 2.27e-01  
18-Jul-2017 19:30:00, 2.27e-01  
18-Jul-2017 19:45:00, 2.27e-01  
18-Jul-2017 20:00:00, 2.27e-01  
18-Jul-2017 20:15:00, 2.27e-01  
18-Jul-2017 20:30:00, 2.27e-01  
18-Jul-2017 20:45:00, 2.27e-01  
18-Jul-2017 21:00:00, 2.27e-01  
18-Jul-2017 21:15:00, 2.27e-01  
18-Jul-2017 21:30:00, 2.27e-01  
18-Jul-2017 21:45:00, 2.27e-01  
18-Jul-2017 22:00:00, 2.27e-01  
18-Jul-2017 22:15:00, 2.27e-01  
18-Jul-2017 22:30:00, 2.27e-01  
18-Jul-2017 22:45:00, 2.27e-01  
18-Jul-2017 23:00:00, 2.27e-01  
18-Jul-2017 23:15:00, 2.27e-01  
18-Jul-2017 23:30:00, 2.27e-01  
18-Jul-2017 23:45:00, 2.27e-01  
19-Jul-2017, 2.27e-01  
19-Jul-2017 00:15:00, 2.27e-01  
19-Jul-2017 00:30:00, 2.27e-01  
19-Jul-2017 00:45:00, 2.27e-01  
19-Jul-2017 01:00:00, 2.27e-01  
19-Jul-2017 01:15:00, 2.27e-01  
19-Jul-2017 01:30:00, 2.27e-01  
19-Jul-2017 01:45:00, 2.27e-01  
19-Jul-2017 02:00:00, 2.27e-01  
19-Jul-2017 02:15:00, 2.27e-01  
19-Jul-2017 02:30:00, 2.27e-01  
19-Jul-2017 02:45:00, 2.27e-01  
19-Jul-2017 03:00:00, 2.27e-01  
19-Jul-2017 03:15:00, 2.27e-01  
19-Jul-2017 03:30:00, 2.27e-01  
19-Jul-2017 03:45:00, 2.27e-01  
19-Jul-2017 04:00:00, 2.27e-01  
19-Jul-2017 04:15:00, 2.27e-01  
19-Jul-2017 04:30:00, 2.27e-01  
19-Jul-2017 04:45:00, 2.27e-01  
19-Jul-2017 05:00:00, 2.27e-01  
19-Jul-2017 05:15:00, 2.27e-01  
19-Jul-2017 05:30:00, 2.27e-01  
19-Jul-2017 05:45:00, 2.27e-01  
19-Jul-2017 06:00:00, 2.27e-01  
19-Jul-2017 06:15:00, 2.27e-01  
19-Jul-2017 06:30:00, 2.27e-01  
19-Jul-2017 06:45:00, 2.27e-01  
19-Jul-2017 07:00:00, 2.27e-01  
19-Jul-2017 07:15:00, 2.27e-01  
19-Jul-2017 07:30:00, 2.27e-01  
19-Jul-2017 07:45:00, 2.27e-01  
19-Jul-2017 08:00:00, 2.27e-01  
19-Jul-2017 08:15:00, 2.27e-01  
19-Jul-2017 08:30:00, 2.27e-01  
19-Jul-2017 08:45:00, 2.27e-01  
19-Jul-2017 09:00:00, 2.27e-01  
19-Jul-2017 09:15:00, 2.27e-01  
19-Jul-2017 09:30:00, 2.27e-01

19-Jul-2017 09:45:00, 2.26e-01  
19-Jul-2017 10:00:00, 2.26e-01  
19-Jul-2017 10:15:00, 2.26e-01  
19-Jul-2017 10:30:00, 2.26e-01  
19-Jul-2017 10:45:00, 2.26e-01  
19-Jul-2017 11:00:00, 2.26e-01  
19-Jul-2017 11:15:00, 2.26e-01  
19-Jul-2017 11:30:00, 2.26e-01  
19-Jul-2017 11:45:00, 2.26e-01  
19-Jul-2017 12:00:00, 2.26e-01  
19-Jul-2017 12:15:00, 2.26e-01  
19-Jul-2017 12:30:00, 2.26e-01  
19-Jul-2017 12:45:00, 2.26e-01  
19-Jul-2017 13:00:00, 2.26e-01  
19-Jul-2017 13:15:00, 2.26e-01  
19-Jul-2017 13:30:00, 2.26e-01  
19-Jul-2017 13:45:00, 2.26e-01  
19-Jul-2017 14:00:00, 2.26e-01  
19-Jul-2017 14:15:00, 2.26e-01  
19-Jul-2017 14:30:00, 2.26e-01  
19-Jul-2017 14:45:00, 2.26e-01  
19-Jul-2017 15:00:00, 2.26e-01  
19-Jul-2017 15:15:00, 2.26e-01  
19-Jul-2017 15:30:00, 2.26e-01  
19-Jul-2017 15:45:00, 2.26e-01  
19-Jul-2017 16:00:00, 2.26e-01  
19-Jul-2017 16:15:00, 2.26e-01  
19-Jul-2017 16:30:00, 2.26e-01  
19-Jul-2017 16:45:00, 2.26e-01  
19-Jul-2017 17:00:00, 2.26e-01  
19-Jul-2017 17:15:00, 2.26e-01  
19-Jul-2017 17:30:00, 2.26e-01  
19-Jul-2017 17:45:00, 2.26e-01  
19-Jul-2017 18:00:00, 2.26e-01  
19-Jul-2017 18:15:00, 2.26e-01  
19-Jul-2017 18:30:00, 2.26e-01  
19-Jul-2017 18:45:00, 2.26e-01  
19-Jul-2017 19:00:00, 2.26e-01  
19-Jul-2017 19:15:00, 2.26e-01  
19-Jul-2017 19:30:00, 2.26e-01  
19-Jul-2017 19:45:00, 2.26e-01  
19-Jul-2017 20:00:00, 2.26e-01  
19-Jul-2017 20:15:00, 2.26e-01  
19-Jul-2017 20:30:00, 2.26e-01  
19-Jul-2017 20:45:00, 2.26e-01  
19-Jul-2017 21:00:00, 2.26e-01  
19-Jul-2017 21:15:00, 2.26e-01  
19-Jul-2017 21:30:00, 2.26e-01  
19-Jul-2017 21:45:00, 2.26e-01  
19-Jul-2017 22:00:00, 2.26e-01  
19-Jul-2017 22:15:00, 2.26e-01  
19-Jul-2017 22:30:00, 2.26e-01  
19-Jul-2017 22:45:00, 2.26e-01  
19-Jul-2017 23:00:00, 2.26e-01  
19-Jul-2017 23:15:00, 2.26e-01  
19-Jul-2017 23:30:00, 2.26e-01  
19-Jul-2017 23:45:00, 2.26e-01  
20-Jul-2017, 2.26e-01  
20-Jul-2017 00:15:00, 2.26e-01  
20-Jul-2017 00:30:00, 2.26e-01  
20-Jul-2017 00:45:00, 2.26e-01  
20-Jul-2017 01:00:00, 2.26e-01  
20-Jul-2017 01:15:00, 2.26e-01  
20-Jul-2017 01:30:00, 2.26e-01

|             |           |          |
|-------------|-----------|----------|
| 20-Jul-2017 | 01:45:00, | 2.26e-01 |
| 20-Jul-2017 | 02:00:00, | 2.26e-01 |
| 20-Jul-2017 | 02:15:00, | 2.26e-01 |
| 20-Jul-2017 | 02:30:00, | 2.26e-01 |
| 20-Jul-2017 | 02:45:00, | 2.26e-01 |
| 20-Jul-2017 | 03:00:00, | 2.26e-01 |
| 20-Jul-2017 | 03:15:00, | 2.26e-01 |
| 20-Jul-2017 | 03:30:00, | 2.26e-01 |
| 20-Jul-2017 | 03:45:00, | 2.26e-01 |
| 20-Jul-2017 | 04:00:00, | 2.26e-01 |
| 20-Jul-2017 | 04:15:00, | 2.26e-01 |
| 20-Jul-2017 | 04:30:00, | 2.26e-01 |
| 20-Jul-2017 | 04:45:00, | 2.26e-01 |
| 20-Jul-2017 | 05:00:00, | 2.26e-01 |
| 20-Jul-2017 | 05:15:00, | 2.26e-01 |
| 20-Jul-2017 | 05:30:00, | 2.26e-01 |
| 20-Jul-2017 | 05:45:00, | 2.26e-01 |
| 20-Jul-2017 | 06:00:00, | 2.26e-01 |
| 20-Jul-2017 | 06:15:00, | 2.26e-01 |
| 20-Jul-2017 | 06:30:00, | 2.26e-01 |
| 20-Jul-2017 | 06:45:00, | 2.26e-01 |
| 20-Jul-2017 | 07:00:00, | 2.26e-01 |
| 20-Jul-2017 | 07:15:00, | 2.26e-01 |
| 20-Jul-2017 | 07:30:00, | 2.26e-01 |
| 20-Jul-2017 | 07:45:00, | 2.26e-01 |
| 20-Jul-2017 | 08:00:00, | 2.26e-01 |
| 20-Jul-2017 | 08:15:00, | 2.26e-01 |
| 20-Jul-2017 | 08:30:00, | 2.26e-01 |
| 20-Jul-2017 | 08:45:00, | 2.26e-01 |
| 20-Jul-2017 | 09:00:00, | 2.26e-01 |
| 20-Jul-2017 | 09:15:00, | 2.26e-01 |
| 20-Jul-2017 | 09:30:00, | 2.26e-01 |
| 20-Jul-2017 | 09:45:00, | 2.25e-01 |
| 20-Jul-2017 | 10:00:00, | 2.25e-01 |
| 20-Jul-2017 | 10:15:00, | 2.25e-01 |
| 20-Jul-2017 | 10:30:00, | 2.25e-01 |
| 20-Jul-2017 | 10:45:00, | 2.25e-01 |
| 20-Jul-2017 | 11:00:00, | 2.25e-01 |
| 20-Jul-2017 | 11:15:00, | 2.25e-01 |
| 20-Jul-2017 | 11:30:00, | 2.25e-01 |
| 20-Jul-2017 | 11:45:00, | 2.25e-01 |
| 20-Jul-2017 | 12:00:00, | 2.25e-01 |
| 20-Jul-2017 | 12:15:00, | 2.25e-01 |
| 20-Jul-2017 | 12:30:00, | 2.25e-01 |
| 20-Jul-2017 | 12:45:00, | 2.25e-01 |
| 20-Jul-2017 | 13:00:00, | 2.25e-01 |
| 20-Jul-2017 | 13:15:00, | 2.25e-01 |
| 20-Jul-2017 | 13:30:00, | 2.25e-01 |
| 20-Jul-2017 | 13:45:00, | 2.25e-01 |
| 20-Jul-2017 | 14:00:00, | 2.25e-01 |
| 20-Jul-2017 | 14:15:00, | 2.25e-01 |
| 20-Jul-2017 | 14:30:00, | 2.24e-01 |
| 20-Jul-2017 | 14:45:00, | 2.25e-01 |
| 20-Jul-2017 | 15:00:00, | 2.24e-01 |
| 20-Jul-2017 | 15:15:00, | 2.24e-01 |
| 20-Jul-2017 | 15:30:00, | 2.24e-01 |
| 20-Jul-2017 | 15:45:00, | 2.24e-01 |
| 20-Jul-2017 | 16:00:00, | 2.24e-01 |
| 20-Jul-2017 | 16:15:00, | 2.24e-01 |
| 20-Jul-2017 | 16:30:00, | 2.24e-01 |
| 20-Jul-2017 | 16:45:00, | 2.24e-01 |
| 20-Jul-2017 | 17:00:00, | 2.24e-01 |
| 20-Jul-2017 | 17:15:00, | 2.25e-01 |
| 20-Jul-2017 | 17:30:00, | 2.24e-01 |

20-Jul-2017 17:45:00, 2.24e-01  
20-Jul-2017 18:00:00, 2.24e-01  
20-Jul-2017 18:15:00, 2.24e-01  
20-Jul-2017 18:30:00, 2.25e-01  
20-Jul-2017 18:45:00, 2.25e-01  
20-Jul-2017 19:00:00, 2.24e-01  
20-Jul-2017 19:15:00, 2.25e-01  
20-Jul-2017 19:30:00, 2.25e-01  
20-Jul-2017 19:45:00, 2.25e-01  
20-Jul-2017 20:00:00, 2.25e-01  
20-Jul-2017 20:15:00, 2.25e-01  
20-Jul-2017 20:30:00, 2.25e-01  
20-Jul-2017 20:45:00, 2.25e-01  
20-Jul-2017 21:00:00, 2.25e-01  
20-Jul-2017 21:15:00, 2.25e-01  
20-Jul-2017 21:30:00, 2.25e-01  
20-Jul-2017 21:45:00, 2.25e-01  
20-Jul-2017 22:00:00, 2.25e-01  
20-Jul-2017 22:15:00, 2.25e-01  
20-Jul-2017 22:30:00, 2.25e-01  
20-Jul-2017 22:45:00, 2.25e-01  
20-Jul-2017 23:00:00, 2.25e-01  
20-Jul-2017 23:15:00, 2.25e-01  
20-Jul-2017 23:30:00, 2.25e-01  
20-Jul-2017 23:45:00, 2.25e-01  
21-Jul-2017, 2.25e-01  
21-Jul-2017 00:15:00, 2.25e-01  
21-Jul-2017 00:30:00, 2.25e-01  
21-Jul-2017 00:45:00, 2.25e-01  
21-Jul-2017 01:00:00, 2.25e-01  
21-Jul-2017 01:15:00, 2.25e-01  
21-Jul-2017 01:30:00, 2.25e-01  
21-Jul-2017 01:45:00, 2.25e-01  
21-Jul-2017 02:00:00, 2.25e-01  
21-Jul-2017 02:15:00, 2.25e-01  
21-Jul-2017 02:30:00, 2.25e-01  
21-Jul-2017 02:45:00, 2.25e-01  
21-Jul-2017 03:00:00, 2.25e-01  
21-Jul-2017 03:15:00, 2.25e-01  
21-Jul-2017 03:30:00, 2.25e-01  
21-Jul-2017 03:45:00, 2.25e-01  
21-Jul-2017 04:00:00, 2.25e-01  
21-Jul-2017 04:15:00, 2.25e-01  
21-Jul-2017 04:30:00, 2.25e-01  
21-Jul-2017 04:45:00, 2.25e-01  
21-Jul-2017 05:00:00, 2.25e-01  
21-Jul-2017 05:15:00, 2.25e-01  
21-Jul-2017 05:30:00, 2.25e-01  
21-Jul-2017 05:45:00, 2.25e-01  
21-Jul-2017 06:00:00, 2.25e-01  
21-Jul-2017 06:15:00, 2.25e-01  
21-Jul-2017 06:30:00, 2.25e-01  
21-Jul-2017 06:45:00, 2.25e-01  
21-Jul-2017 07:00:00, 2.25e-01  
21-Jul-2017 07:15:00, 2.25e-01  
21-Jul-2017 07:30:00, 2.25e-01  
21-Jul-2017 07:45:00, 2.24e-01  
21-Jul-2017 08:00:00, 2.24e-01  
21-Jul-2017 08:15:00, 2.25e-01  
21-Jul-2017 08:30:00, 2.24e-01  
21-Jul-2017 08:45:00, 2.24e-01  
21-Jul-2017 09:00:00, 2.24e-01  
21-Jul-2017 09:15:00, 2.24e-01  
21-Jul-2017 09:30:00, 2.24e-01

21-Jul-2017 09:45:00, 2.24e-01  
21-Jul-2017 10:00:00, 2.24e-01  
21-Jul-2017 10:15:00, 2.24e-01  
21-Jul-2017 10:30:00, 2.24e-01  
21-Jul-2017 10:45:00, 2.24e-01  
21-Jul-2017 11:00:00, 2.24e-01  
21-Jul-2017 11:15:00, 2.24e-01  
21-Jul-2017 11:30:00, 2.24e-01  
21-Jul-2017 11:45:00, 2.23e-01  
21-Jul-2017 12:00:00, 2.23e-01  
21-Jul-2017 12:15:00, 2.23e-01  
21-Jul-2017 12:30:00, 2.23e-01  
21-Jul-2017 12:45:00, 2.23e-01  
21-Jul-2017 13:00:00, 2.23e-01  
21-Jul-2017 13:15:00, 2.23e-01  
21-Jul-2017 13:30:00, 2.23e-01  
21-Jul-2017 13:45:00, 2.23e-01  
21-Jul-2017 14:00:00, 2.23e-01  
21-Jul-2017 14:15:00, 2.23e-01  
21-Jul-2017 14:30:00, 2.23e-01  
21-Jul-2017 14:45:00, 2.23e-01  
21-Jul-2017 15:00:00, 2.23e-01  
21-Jul-2017 15:15:00, 2.23e-01  
21-Jul-2017 15:30:00, 2.23e-01  
21-Jul-2017 15:45:00, 2.23e-01  
21-Jul-2017 16:00:00, 2.23e-01  
21-Jul-2017 16:15:00, 2.23e-01  
21-Jul-2017 16:30:00, 2.23e-01  
21-Jul-2017 16:45:00, 2.23e-01  
21-Jul-2017 17:00:00, 2.23e-01  
21-Jul-2017 17:15:00, 2.23e-01  
21-Jul-2017 17:30:00, 2.23e-01  
21-Jul-2017 17:45:00, 2.23e-01  
21-Jul-2017 18:00:00, 2.23e-01  
21-Jul-2017 18:15:00, 2.23e-01  
21-Jul-2017 18:30:00, 2.23e-01  
21-Jul-2017 18:45:00, 2.23e-01  
21-Jul-2017 19:00:00, 2.23e-01  
21-Jul-2017 19:15:00, 2.23e-01  
21-Jul-2017 19:30:00, 2.23e-01  
21-Jul-2017 19:45:00, 2.23e-01  
21-Jul-2017 20:00:00, 2.23e-01  
21-Jul-2017 20:15:00, 2.23e-01  
21-Jul-2017 20:30:00, 2.23e-01  
21-Jul-2017 20:45:00, 2.23e-01  
21-Jul-2017 21:00:00, 2.23e-01  
21-Jul-2017 21:15:00, 2.23e-01  
21-Jul-2017 21:30:00, 2.23e-01  
21-Jul-2017 21:45:00, 2.23e-01  
21-Jul-2017 22:00:00, 2.23e-01  
21-Jul-2017 22:15:00, 2.23e-01  
21-Jul-2017 22:30:00, 2.23e-01  
21-Jul-2017 22:45:00, 2.23e-01  
21-Jul-2017 23:00:00, 2.23e-01  
21-Jul-2017 23:15:00, 2.23e-01  
21-Jul-2017 23:30:00, 2.23e-01  
21-Jul-2017 23:45:00, 2.23e-01  
22-Jul-2017, 2.23e-01  
22-Jul-2017 00:15:00, 2.23e-01  
22-Jul-2017 00:30:00, 2.23e-01  
22-Jul-2017 00:45:00, 2.23e-01  
22-Jul-2017 01:00:00, 2.23e-01  
22-Jul-2017 01:15:00, 2.23e-01  
22-Jul-2017 01:30:00, 2.23e-01

22-Jul-2017 01:45:00, 2.23e-01  
22-Jul-2017 02:00:00, 2.23e-01  
22-Jul-2017 02:15:00, 2.23e-01  
22-Jul-2017 02:30:00, 2.23e-01  
22-Jul-2017 02:45:00, 2.23e-01  
22-Jul-2017 03:00:00, 2.23e-01  
22-Jul-2017 03:15:00, 2.23e-01  
22-Jul-2017 03:30:00, 2.23e-01  
22-Jul-2017 03:45:00, 2.23e-01  
22-Jul-2017 04:00:00, 2.23e-01  
22-Jul-2017 04:15:00, 2.23e-01  
22-Jul-2017 04:30:00, 2.23e-01  
22-Jul-2017 04:45:00, 2.23e-01  
22-Jul-2017 05:00:00, 2.23e-01  
22-Jul-2017 05:15:00, 2.23e-01  
22-Jul-2017 05:30:00, 2.23e-01  
22-Jul-2017 05:45:00, 2.23e-01  
22-Jul-2017 06:00:00, 2.23e-01  
22-Jul-2017 06:15:00, 2.23e-01  
22-Jul-2017 06:30:00, 2.23e-01  
22-Jul-2017 06:45:00, 2.23e-01  
22-Jul-2017 07:00:00, 2.23e-01  
22-Jul-2017 07:15:00, 2.23e-01  
22-Jul-2017 07:30:00, 2.23e-01  
22-Jul-2017 07:45:00, 2.23e-01  
22-Jul-2017 08:00:00, 2.23e-01  
22-Jul-2017 08:15:00, 2.23e-01  
22-Jul-2017 08:30:00, 2.23e-01  
22-Jul-2017 08:45:00, 2.23e-01  
22-Jul-2017 09:00:00, 2.22e-01  
22-Jul-2017 09:15:00, 2.22e-01  
22-Jul-2017 09:30:00, 2.22e-01  
22-Jul-2017 09:45:00, 2.22e-01  
22-Jul-2017 10:00:00, 2.22e-01  
22-Jul-2017 10:15:00, 2.22e-01  
22-Jul-2017 10:30:00, 2.22e-01  
22-Jul-2017 10:45:00, 2.22e-01  
22-Jul-2017 11:00:00, 2.22e-01  
22-Jul-2017 11:15:00, 2.22e-01  
22-Jul-2017 11:30:00, 2.22e-01  
22-Jul-2017 11:45:00, 2.22e-01  
22-Jul-2017 12:00:00, 2.22e-01  
22-Jul-2017 12:15:00, 2.22e-01  
22-Jul-2017 12:30:00, 2.22e-01  
22-Jul-2017 12:45:00, 2.22e-01  
22-Jul-2017 13:00:00, 2.22e-01  
22-Jul-2017 13:15:00, 2.22e-01  
22-Jul-2017 13:30:00, 2.21e-01  
22-Jul-2017 13:45:00, 2.21e-01  
22-Jul-2017 14:00:00, 2.22e-01  
22-Jul-2017 14:15:00, 2.21e-01  
22-Jul-2017 14:30:00, 2.21e-01  
22-Jul-2017 14:45:00, 2.21e-01  
22-Jul-2017 15:00:00, 2.21e-01  
22-Jul-2017 15:15:00, 2.21e-01  
22-Jul-2017 15:30:00, 2.21e-01  
22-Jul-2017 15:45:00, 2.21e-01  
22-Jul-2017 16:00:00, 2.21e-01  
22-Jul-2017 16:15:00, 2.21e-01  
22-Jul-2017 16:30:00, 2.21e-01  
22-Jul-2017 16:45:00, 2.21e-01  
22-Jul-2017 17:00:00, 2.21e-01  
22-Jul-2017 17:15:00, 2.21e-01  
22-Jul-2017 17:30:00, 2.21e-01

22-Jul-2017 17:45:00, 2.21e-01  
22-Jul-2017 18:00:00, 2.21e-01  
22-Jul-2017 18:15:00, 2.21e-01  
22-Jul-2017 18:30:00, 2.21e-01  
22-Jul-2017 18:45:00, 2.21e-01  
22-Jul-2017 19:00:00, 2.21e-01  
22-Jul-2017 19:15:00, 2.21e-01  
22-Jul-2017 19:30:00, 2.21e-01  
22-Jul-2017 19:45:00, 2.21e-01  
22-Jul-2017 20:00:00, 2.21e-01  
22-Jul-2017 20:15:00, 2.21e-01  
22-Jul-2017 20:30:00, 2.21e-01  
22-Jul-2017 20:45:00, 2.21e-01  
22-Jul-2017 21:00:00, 2.21e-01  
22-Jul-2017 21:15:00, 2.21e-01  
22-Jul-2017 21:30:00, 2.21e-01  
22-Jul-2017 21:45:00, 2.21e-01  
22-Jul-2017 22:00:00, 2.21e-01  
22-Jul-2017 22:15:00, 2.21e-01  
22-Jul-2017 22:30:00, 2.21e-01  
22-Jul-2017 22:45:00, 2.22e-01  
22-Jul-2017 23:00:00, 2.22e-01  
22-Jul-2017 23:15:00, 2.21e-01  
22-Jul-2017 23:30:00, 2.22e-01  
22-Jul-2017 23:45:00, 2.22e-01  
23-Jul-2017, 2.21e-01  
23-Jul-2017 00:15:00, 2.21e-01  
23-Jul-2017 00:30:00, 2.21e-01  
23-Jul-2017 00:45:00, 2.21e-01  
23-Jul-2017 01:00:00, 2.21e-01  
23-Jul-2017 01:15:00, 2.21e-01  
23-Jul-2017 01:30:00, 2.21e-01  
23-Jul-2017 01:45:00, 2.21e-01  
23-Jul-2017 02:00:00, 2.21e-01  
23-Jul-2017 02:15:00, 2.21e-01  
23-Jul-2017 02:30:00, 2.21e-01  
23-Jul-2017 02:45:00, 2.21e-01  
23-Jul-2017 03:00:00, 2.21e-01  
23-Jul-2017 03:15:00, 2.21e-01  
23-Jul-2017 03:30:00, 2.21e-01  
23-Jul-2017 03:45:00, 2.21e-01  
23-Jul-2017 04:00:00, 2.21e-01  
23-Jul-2017 04:15:00, 2.21e-01  
23-Jul-2017 04:30:00, 2.21e-01  
23-Jul-2017 04:45:00, 2.21e-01  
23-Jul-2017 05:00:00, 2.21e-01  
23-Jul-2017 05:15:00, 2.21e-01  
23-Jul-2017 05:30:00, 2.21e-01  
23-Jul-2017 05:45:00, 2.21e-01  
23-Jul-2017 06:00:00, 2.21e-01  
23-Jul-2017 06:15:00, 2.21e-01  
23-Jul-2017 06:30:00, 2.21e-01  
23-Jul-2017 06:45:00, 2.21e-01  
23-Jul-2017 07:00:00, 2.21e-01  
23-Jul-2017 07:15:00, 2.21e-01  
23-Jul-2017 07:30:00, 2.21e-01  
23-Jul-2017 07:45:00, 2.21e-01  
23-Jul-2017 08:00:00, 2.21e-01  
23-Jul-2017 08:15:00, 2.21e-01  
23-Jul-2017 08:30:00, 2.21e-01  
23-Jul-2017 08:45:00, 2.21e-01  
23-Jul-2017 09:00:00, 2.21e-01  
23-Jul-2017 09:15:00, 2.20e-01  
23-Jul-2017 09:30:00, 2.20e-01

23-Jul-2017 09:45:00, 2.20e-01  
23-Jul-2017 10:00:00, 2.20e-01  
23-Jul-2017 10:15:00, 2.20e-01  
23-Jul-2017 10:30:00, 2.20e-01  
23-Jul-2017 10:45:00, 2.20e-01  
23-Jul-2017 11:00:00, 2.20e-01  
23-Jul-2017 11:15:00, 2.20e-01  
23-Jul-2017 11:30:00, 2.20e-01  
23-Jul-2017 11:45:00, 2.20e-01  
23-Jul-2017 12:00:00, 2.20e-01  
23-Jul-2017 12:15:00, 2.20e-01  
23-Jul-2017 12:30:00, 2.20e-01  
23-Jul-2017 12:45:00, 2.20e-01  
23-Jul-2017 13:00:00, 2.20e-01  
23-Jul-2017 13:15:00, 2.20e-01  
23-Jul-2017 13:30:00, 2.20e-01  
23-Jul-2017 13:45:00, 2.20e-01  
23-Jul-2017 14:00:00, 2.20e-01  
23-Jul-2017 14:15:00, 2.20e-01  
23-Jul-2017 14:30:00, 2.19e-01  
23-Jul-2017 14:45:00, 2.20e-01  
23-Jul-2017 15:00:00, 2.20e-01  
23-Jul-2017 15:15:00, 2.20e-01  
23-Jul-2017 15:30:00, 2.20e-01  
23-Jul-2017 15:45:00, 2.20e-01  
23-Jul-2017 16:00:00, 2.20e-01  
23-Jul-2017 16:15:00, 2.20e-01  
23-Jul-2017 16:30:00, 2.20e-01  
23-Jul-2017 16:45:00, 2.20e-01  
23-Jul-2017 17:00:00, 2.20e-01  
23-Jul-2017 17:15:00, 2.20e-01  
23-Jul-2017 17:30:00, 2.20e-01  
23-Jul-2017 17:45:00, 2.20e-01  
23-Jul-2017 18:00:00, 2.20e-01  
23-Jul-2017 18:15:00, 2.20e-01  
23-Jul-2017 18:30:00, 2.20e-01  
23-Jul-2017 18:45:00, 2.20e-01  
23-Jul-2017 19:00:00, 2.20e-01  
23-Jul-2017 19:15:00, 2.20e-01  
23-Jul-2017 19:30:00, 2.20e-01  
23-Jul-2017 19:45:00, 2.20e-01  
23-Jul-2017 20:00:00, 2.20e-01  
23-Jul-2017 20:15:00, 2.20e-01  
23-Jul-2017 20:30:00, 2.20e-01  
23-Jul-2017 20:45:00, 2.20e-01  
23-Jul-2017 21:00:00, 2.20e-01  
23-Jul-2017 21:15:00, 2.20e-01  
23-Jul-2017 21:30:00, 2.20e-01  
23-Jul-2017 21:45:00, 2.20e-01  
23-Jul-2017 22:00:00, 2.20e-01  
23-Jul-2017 22:15:00, 2.20e-01  
23-Jul-2017 22:30:00, 2.20e-01  
23-Jul-2017 22:45:00, 2.20e-01  
23-Jul-2017 23:00:00, 2.20e-01  
23-Jul-2017 23:15:00, 2.20e-01  
23-Jul-2017 23:30:00, 2.20e-01  
23-Jul-2017 23:45:00, 2.20e-01  
24-Jul-2017, 2.20e-01  
24-Jul-2017 00:15:00, 2.20e-01  
24-Jul-2017 00:30:00, 2.20e-01  
24-Jul-2017 00:45:00, 2.20e-01  
24-Jul-2017 01:00:00, 2.20e-01  
24-Jul-2017 01:15:00, 2.20e-01  
24-Jul-2017 01:30:00, 2.20e-01



24-Jul-2017 01:45:00, 2.20e-01  
24-Jul-2017 02:00:00, 2.20e-01  
24-Jul-2017 02:15:00, 2.20e-01  
24-Jul-2017 02:30:00, 2.20e-01  
24-Jul-2017 02:45:00, 2.20e-01  
24-Jul-2017 03:00:00, 2.20e-01  
24-Jul-2017 03:15:00, 2.20e-01  
24-Jul-2017 03:30:00, 2.20e-01  
24-Jul-2017 03:45:00, 2.20e-01  
24-Jul-2017 04:00:00, 2.20e-01  
24-Jul-2017 04:15:00, 2.20e-01  
24-Jul-2017 04:30:00, 2.20e-01  
24-Jul-2017 04:45:00, 2.20e-01  
24-Jul-2017 05:00:00, 2.20e-01  
24-Jul-2017 05:15:00, 2.20e-01  
24-Jul-2017 05:30:00, 2.20e-01  
24-Jul-2017 05:45:00, 2.20e-01  
24-Jul-2017 06:00:00, 2.20e-01  
24-Jul-2017 06:15:00, 2.20e-01  
24-Jul-2017 06:30:00, 2.20e-01  
24-Jul-2017 06:45:00, 2.20e-01  
24-Jul-2017 07:00:00, 2.20e-01  
24-Jul-2017 07:15:00, 2.19e-01  
24-Jul-2017 07:30:00, 2.20e-01  
24-Jul-2017 07:45:00, 2.19e-01  
24-Jul-2017 08:00:00, 2.19e-01  
24-Jul-2017 08:15:00, 2.19e-01  
24-Jul-2017 08:30:00, 2.19e-01  
24-Jul-2017 08:45:00, 2.19e-01  
24-Jul-2017 09:00:00, 2.19e-01  
24-Jul-2017 09:15:00, 2.19e-01  
24-Jul-2017 09:30:00, 2.18e-01  
24-Jul-2017 09:45:00, 2.18e-01  
24-Jul-2017 10:00:00, 2.18e-01  
24-Jul-2017 10:15:00, 2.18e-01  
24-Jul-2017 10:30:00, 2.18e-01  
24-Jul-2017 10:45:00, 2.18e-01  
24-Jul-2017 11:00:00, 2.18e-01  
24-Jul-2017 11:15:00, 2.18e-01  
24-Jul-2017 11:30:00, 2.18e-01  
24-Jul-2017 11:45:00, 2.18e-01  
24-Jul-2017 12:00:00, 2.18e-01  
24-Jul-2017 12:15:00, 2.18e-01  
24-Jul-2017 12:30:00, 2.18e-01  
24-Jul-2017 12:45:00, 2.18e-01  
24-Jul-2017 13:00:00, 2.18e-01  
24-Jul-2017 13:15:00, 2.18e-01  
24-Jul-2017 13:30:00, 2.18e-01  
24-Jul-2017 13:45:00, 2.18e-01  
24-Jul-2017 14:00:00, 2.18e-01  
24-Jul-2017 14:15:00, 2.18e-01  
24-Jul-2017 14:30:00, 2.18e-01  
24-Jul-2017 14:45:00, 2.18e-01  
24-Jul-2017 15:00:00, 2.18e-01  
24-Jul-2017 15:15:00, 2.18e-01  
24-Jul-2017 15:30:00, 2.18e-01  
24-Jul-2017 15:45:00, 2.18e-01  
24-Jul-2017 16:00:00, 2.18e-01  
24-Jul-2017 16:15:00, 2.18e-01  
24-Jul-2017 16:30:00, 2.18e-01  
24-Jul-2017 16:45:00, 2.17e-01  
24-Jul-2017 17:00:00, 2.17e-01  
24-Jul-2017 17:15:00, 2.17e-01  
24-Jul-2017 17:30:00, 2.17e-01

24-Jul-2017 17:45:00, 2.17e-01  
24-Jul-2017 18:00:00, 2.17e-01  
24-Jul-2017 18:15:00, 2.17e-01  
24-Jul-2017 18:30:00, 2.18e-01  
24-Jul-2017 18:45:00, 2.18e-01  
24-Jul-2017 19:00:00, 2.18e-01  
24-Jul-2017 19:15:00, 2.18e-01  
24-Jul-2017 19:30:00, 2.18e-01  
24-Jul-2017 19:45:00, 2.18e-01  
24-Jul-2017 20:00:00, 2.18e-01  
24-Jul-2017 20:15:00, 2.18e-01  
24-Jul-2017 20:30:00, 2.18e-01  
24-Jul-2017 20:45:00, 2.18e-01  
24-Jul-2017 21:00:00, 2.18e-01  
24-Jul-2017 21:15:00, 2.18e-01  
24-Jul-2017 21:30:00, 2.18e-01  
24-Jul-2017 21:45:00, 2.18e-01  
24-Jul-2017 22:00:00, 2.18e-01  
24-Jul-2017 22:15:00, 2.18e-01  
24-Jul-2017 22:30:00, 2.18e-01  
24-Jul-2017 22:45:00, 2.18e-01  
24-Jul-2017 23:00:00, 2.18e-01  
24-Jul-2017 23:15:00, 2.18e-01  
24-Jul-2017 23:30:00, 2.18e-01  
24-Jul-2017 23:45:00, 2.18e-01  
25-Jul-2017, 2.18e-01  
25-Jul-2017 00:15:00, 2.18e-01  
25-Jul-2017 00:30:00, 2.18e-01  
25-Jul-2017 00:45:00, 2.18e-01  
25-Jul-2017 01:00:00, 2.18e-01  
25-Jul-2017 01:15:00, 2.18e-01  
25-Jul-2017 01:30:00, 2.18e-01  
25-Jul-2017 01:45:00, 2.18e-01  
25-Jul-2017 02:00:00, 2.18e-01  
25-Jul-2017 02:15:00, 2.18e-01  
25-Jul-2017 02:30:00, 2.18e-01  
25-Jul-2017 02:45:00, 2.18e-01  
25-Jul-2017 03:00:00, 2.18e-01  
25-Jul-2017 03:15:00, 2.18e-01  
25-Jul-2017 03:30:00, 2.18e-01  
25-Jul-2017 03:45:00, 2.18e-01  
25-Jul-2017 04:00:00, 2.18e-01  
25-Jul-2017 04:15:00, 2.18e-01  
25-Jul-2017 04:30:00, 2.18e-01  
25-Jul-2017 04:45:00, 2.18e-01  
25-Jul-2017 05:00:00, 2.18e-01  
25-Jul-2017 05:15:00, 2.18e-01  
25-Jul-2017 05:30:00, 2.18e-01  
25-Jul-2017 05:45:00, 2.18e-01  
25-Jul-2017 06:00:00, 2.18e-01  
25-Jul-2017 06:15:00, 2.18e-01  
25-Jul-2017 06:30:00, 2.18e-01  
25-Jul-2017 06:45:00, 2.18e-01  
25-Jul-2017 07:00:00, 2.18e-01  
25-Jul-2017 07:15:00, 2.18e-01  
25-Jul-2017 07:30:00, 2.18e-01  
25-Jul-2017 07:45:00, 2.18e-01  
25-Jul-2017 08:00:00, 2.18e-01  
25-Jul-2017 08:15:00, 2.18e-01  
25-Jul-2017 08:30:00, 2.18e-01  
25-Jul-2017 08:45:00, 2.18e-01  
25-Jul-2017 09:00:00, 2.18e-01  
25-Jul-2017 09:15:00, 2.18e-01  
25-Jul-2017 09:30:00, 2.18e-01

25-Jul-2017 09:45:00, 2.18e-01  
25-Jul-2017 10:00:00, 2.18e-01  
25-Jul-2017 10:15:00, 2.18e-01  
25-Jul-2017 10:30:00, 2.18e-01  
25-Jul-2017 10:45:00, 2.18e-01  
25-Jul-2017 11:00:00, 2.18e-01  
25-Jul-2017 11:15:00, 2.18e-01  
25-Jul-2017 11:30:00, 2.18e-01  
25-Jul-2017 11:45:00, 2.18e-01  
25-Jul-2017 12:00:00, 2.18e-01  
25-Jul-2017 12:15:00, 2.18e-01  
25-Jul-2017 12:30:00, 2.18e-01  
25-Jul-2017 12:45:00, 2.18e-01  
25-Jul-2017 13:00:00, 2.18e-01  
25-Jul-2017 13:15:00, 2.18e-01  
25-Jul-2017 13:30:00, 2.18e-01  
25-Jul-2017 13:45:00, 2.18e-01  
25-Jul-2017 14:00:00, 2.18e-01  
25-Jul-2017 14:15:00, 2.18e-01  
25-Jul-2017 14:30:00, 2.18e-01  
25-Jul-2017 14:45:00, 2.18e-01  
25-Jul-2017 15:00:00, 2.18e-01  
25-Jul-2017 15:15:00, 2.18e-01  
25-Jul-2017 15:30:00, 2.18e-01  
25-Jul-2017 15:45:00, 2.18e-01  
25-Jul-2017 16:00:00, 2.18e-01  
25-Jul-2017 16:15:00, 2.18e-01  
25-Jul-2017 16:30:00, 2.18e-01  
25-Jul-2017 16:45:00, 2.18e-01  
25-Jul-2017 17:00:00, 2.20e-01  
25-Jul-2017 17:15:00, 2.40e-01  
25-Jul-2017 17:30:00, 2.41e-01  
25-Jul-2017 17:45:00, 2.39e-01  
25-Jul-2017 18:00:00, 2.38e-01  
25-Jul-2017 18:15:00, 2.37e-01  
25-Jul-2017 18:30:00, 2.37e-01  
25-Jul-2017 18:45:00, 2.36e-01  
25-Jul-2017 19:00:00, 2.36e-01  
25-Jul-2017 19:15:00, 2.36e-01  
25-Jul-2017 19:30:00, 2.36e-01  
25-Jul-2017 19:45:00, 2.36e-01  
25-Jul-2017 20:00:00, 2.35e-01  
25-Jul-2017 20:15:00, 2.35e-01  
25-Jul-2017 20:30:00, 2.35e-01  
25-Jul-2017 20:45:00, 2.35e-01  
25-Jul-2017 21:00:00, 2.35e-01  
25-Jul-2017 21:15:00, 2.35e-01  
25-Jul-2017 21:30:00, 2.34e-01  
25-Jul-2017 21:45:00, 2.34e-01  
25-Jul-2017 22:00:00, 2.34e-01  
25-Jul-2017 22:15:00, 2.34e-01  
25-Jul-2017 22:30:00, 2.34e-01  
25-Jul-2017 22:45:00, 2.34e-01  
25-Jul-2017 23:00:00, 2.34e-01  
25-Jul-2017 23:15:00, 2.34e-01  
25-Jul-2017 23:30:00, 2.34e-01  
25-Jul-2017 23:45:00, 2.34e-01  
26-Jul-2017, 2.34e-01  
26-Jul-2017 00:15:00, 2.34e-01  
26-Jul-2017 00:30:00, 2.34e-01  
26-Jul-2017 00:45:00, 2.34e-01  
26-Jul-2017 01:00:00, 2.34e-01  
26-Jul-2017 01:15:00, 2.34e-01  
26-Jul-2017 01:30:00, 2.34e-01

26-Jul-2017 01:45:00, 2.34e-01  
26-Jul-2017 02:00:00, 2.34e-01  
26-Jul-2017 02:15:00, 2.34e-01  
26-Jul-2017 02:30:00, 2.34e-01  
26-Jul-2017 02:45:00, 2.34e-01  
26-Jul-2017 03:00:00, 2.34e-01  
26-Jul-2017 03:15:00, 2.34e-01  
26-Jul-2017 03:30:00, 2.34e-01  
26-Jul-2017 03:45:00, 2.34e-01  
26-Jul-2017 04:00:00, 2.34e-01  
26-Jul-2017 04:15:00, 2.34e-01  
26-Jul-2017 04:30:00, 2.34e-01  
26-Jul-2017 04:45:00, 2.34e-01  
26-Jul-2017 05:00:00, 2.34e-01  
26-Jul-2017 05:15:00, 2.34e-01  
26-Jul-2017 05:30:00, 2.34e-01  
26-Jul-2017 05:45:00, 2.34e-01  
26-Jul-2017 06:00:00, 2.34e-01  
26-Jul-2017 06:15:00, 2.34e-01  
26-Jul-2017 06:30:00, 2.34e-01  
26-Jul-2017 06:45:00, 2.34e-01  
26-Jul-2017 07:00:00, 2.35e-01  
26-Jul-2017 07:15:00, 2.34e-01  
26-Jul-2017 07:30:00, 2.34e-01  
26-Jul-2017 07:45:00, 2.34e-01  
26-Jul-2017 08:00:00, 2.34e-01  
26-Jul-2017 08:15:00, 2.35e-01  
26-Jul-2017 08:30:00, 2.34e-01  
26-Jul-2017 08:45:00, 2.35e-01  
26-Jul-2017 09:00:00, 2.35e-01  
26-Jul-2017 09:15:00, 2.35e-01  
26-Jul-2017 09:30:00, 2.35e-01  
26-Jul-2017 09:45:00, 2.35e-01  
26-Jul-2017 10:00:00, 2.35e-01  
26-Jul-2017 10:15:00, 2.35e-01  
26-Jul-2017 10:30:00, 2.35e-01  
26-Jul-2017 10:45:00, 2.35e-01  
26-Jul-2017 11:00:00, 2.35e-01  
26-Jul-2017 11:15:00, 2.35e-01  
26-Jul-2017 11:30:00, 2.35e-01  
26-Jul-2017 11:45:00, 2.35e-01  
26-Jul-2017 12:00:00, 2.35e-01  
26-Jul-2017 12:15:00, 2.35e-01  
26-Jul-2017 12:30:00, 2.35e-01  
26-Jul-2017 12:45:00, 2.35e-01  
26-Jul-2017 13:00:00, 2.35e-01  
26-Jul-2017 13:15:00, 2.34e-01  
26-Jul-2017 13:30:00, 2.35e-01  
26-Jul-2017 13:45:00, 2.35e-01  
26-Jul-2017 14:00:00, 2.34e-01  
26-Jul-2017 14:15:00, 2.35e-01  
26-Jul-2017 14:30:00, 2.34e-01  
26-Jul-2017 14:45:00, 2.34e-01  
26-Jul-2017 15:00:00, 2.34e-01  
26-Jul-2017 15:15:00, 2.35e-01  
26-Jul-2017 15:30:00, 2.34e-01  
26-Jul-2017 15:45:00, 2.34e-01  
26-Jul-2017 16:00:00, 2.34e-01  
26-Jul-2017 16:15:00, 2.34e-01  
26-Jul-2017 16:30:00, 2.34e-01  
26-Jul-2017 16:45:00, 2.34e-01  
26-Jul-2017 17:00:00, 2.34e-01  
26-Jul-2017 17:15:00, 2.34e-01  
26-Jul-2017 17:30:00, 2.34e-01

26-Jul-2017 17:45:00, 2.34e-01  
26-Jul-2017 18:00:00, 2.34e-01  
26-Jul-2017 18:15:00, 2.34e-01  
26-Jul-2017 18:30:00, 2.34e-01  
26-Jul-2017 18:45:00, 2.35e-01  
26-Jul-2017 19:00:00, 2.35e-01  
26-Jul-2017 19:15:00, 2.35e-01  
26-Jul-2017 19:30:00, 2.35e-01  
26-Jul-2017 19:45:00, 2.35e-01  
26-Jul-2017 20:00:00, 2.35e-01  
26-Jul-2017 20:15:00, 2.35e-01  
26-Jul-2017 20:30:00, 2.35e-01  
26-Jul-2017 20:45:00, 2.35e-01  
26-Jul-2017 21:00:00, 2.35e-01  
26-Jul-2017 21:15:00, 2.35e-01  
26-Jul-2017 21:30:00, 2.35e-01  
26-Jul-2017 21:45:00, 2.35e-01  
26-Jul-2017 22:00:00, 2.35e-01  
26-Jul-2017 22:15:00, 2.35e-01  
26-Jul-2017 22:30:00, 2.35e-01  
26-Jul-2017 22:45:00, 2.35e-01  
26-Jul-2017 23:00:00, 2.35e-01  
26-Jul-2017 23:15:00, 2.35e-01  
26-Jul-2017 23:30:00, 2.35e-01  
26-Jul-2017 23:45:00, 2.35e-01  
27-Jul-2017, 2.35e-01  
27-Jul-2017 00:15:00, 2.35e-01  
27-Jul-2017 00:30:00, 2.35e-01  
27-Jul-2017 00:45:00, 2.35e-01  
27-Jul-2017 01:00:00, 2.35e-01  
27-Jul-2017 01:15:00, 2.35e-01  
27-Jul-2017 01:30:00, 2.35e-01  
27-Jul-2017 01:45:00, 2.35e-01  
27-Jul-2017 02:00:00, 2.35e-01  
27-Jul-2017 02:15:00, 2.35e-01  
27-Jul-2017 02:30:00, 2.35e-01  
27-Jul-2017 02:45:00, 2.35e-01  
27-Jul-2017 03:00:00, 2.35e-01  
27-Jul-2017 03:15:00, 2.35e-01  
27-Jul-2017 03:30:00, 2.35e-01  
27-Jul-2017 03:45:00, 2.35e-01  
27-Jul-2017 04:00:00, 2.35e-01  
27-Jul-2017 04:15:00, 2.35e-01  
27-Jul-2017 04:30:00, 2.35e-01  
27-Jul-2017 04:45:00, 2.35e-01  
27-Jul-2017 05:00:00, 2.35e-01  
27-Jul-2017 05:15:00, 2.35e-01  
27-Jul-2017 05:30:00, 2.35e-01  
27-Jul-2017 05:45:00, 2.35e-01  
27-Jul-2017 06:00:00, 2.35e-01  
27-Jul-2017 06:15:00, 2.35e-01  
27-Jul-2017 06:30:00, 2.35e-01  
27-Jul-2017 06:45:00, 2.35e-01  
27-Jul-2017 07:00:00, 2.35e-01  
27-Jul-2017 07:15:00, 2.35e-01  
27-Jul-2017 07:30:00, 2.35e-01  
27-Jul-2017 07:45:00, 2.35e-01  
27-Jul-2017 08:00:00, 2.35e-01  
27-Jul-2017 08:15:00, 2.35e-01  
27-Jul-2017 08:30:00, 2.35e-01  
27-Jul-2017 08:45:00, 2.35e-01  
27-Jul-2017 09:00:00, 2.35e-01  
27-Jul-2017 09:15:00, 2.35e-01  
27-Jul-2017 09:30:00, 2.35e-01

27-Jul-2017 09:45:00, 2.35e-01  
27-Jul-2017 10:00:00, 2.34e-01  
27-Jul-2017 10:15:00, 2.35e-01  
27-Jul-2017 10:30:00, 2.34e-01  
27-Jul-2017 10:45:00, 2.34e-01  
27-Jul-2017 11:00:00, 2.34e-01  
27-Jul-2017 11:15:00, 2.34e-01  
27-Jul-2017 11:30:00, 2.34e-01  
27-Jul-2017 11:45:00, 2.34e-01  
27-Jul-2017 12:00:00, 2.34e-01  
27-Jul-2017 12:15:00, 2.34e-01  
27-Jul-2017 12:30:00, 2.34e-01  
27-Jul-2017 12:45:00, 2.34e-01  
27-Jul-2017 13:00:00, 2.34e-01  
27-Jul-2017 13:15:00, 2.34e-01  
27-Jul-2017 13:30:00, 2.34e-01  
27-Jul-2017 13:45:00, 2.34e-01  
27-Jul-2017 14:00:00, 2.34e-01  
27-Jul-2017 14:15:00, 2.34e-01  
27-Jul-2017 14:30:00, 2.34e-01  
27-Jul-2017 14:45:00, 2.34e-01  
27-Jul-2017 15:00:00, 2.34e-01  
27-Jul-2017 15:15:00, 2.34e-01  
27-Jul-2017 15:30:00, 2.34e-01  
27-Jul-2017 15:45:00, 2.34e-01  
27-Jul-2017 16:00:00, 2.34e-01  
27-Jul-2017 16:15:00, 2.34e-01  
27-Jul-2017 16:30:00, 2.34e-01  
27-Jul-2017 16:45:00, 2.34e-01  
27-Jul-2017 17:00:00, 2.34e-01  
27-Jul-2017 17:15:00, 2.34e-01  
27-Jul-2017 17:30:00, 2.34e-01  
27-Jul-2017 17:45:00, 2.34e-01  
27-Jul-2017 18:00:00, 2.34e-01  
27-Jul-2017 18:15:00, 2.34e-01  
27-Jul-2017 18:30:00, 2.34e-01  
27-Jul-2017 18:45:00, 2.34e-01  
27-Jul-2017 19:00:00, 2.34e-01  
27-Jul-2017 19:15:00, 2.34e-01  
27-Jul-2017 19:30:00, 2.34e-01  
27-Jul-2017 19:45:00, 2.34e-01  
27-Jul-2017 20:00:00, 2.34e-01  
27-Jul-2017 20:15:00, 2.34e-01  
27-Jul-2017 20:30:00, 2.34e-01  
27-Jul-2017 20:45:00, 2.34e-01  
27-Jul-2017 21:00:00, 2.34e-01  
27-Jul-2017 21:15:00, 2.34e-01  
27-Jul-2017 21:30:00, 2.34e-01  
27-Jul-2017 21:45:00, 2.34e-01  
27-Jul-2017 22:00:00, 2.34e-01  
27-Jul-2017 22:15:00, 2.34e-01  
27-Jul-2017 22:30:00, 2.34e-01  
27-Jul-2017 22:45:00, 2.34e-01  
27-Jul-2017 23:00:00, 2.34e-01  
27-Jul-2017 23:15:00, 2.34e-01  
27-Jul-2017 23:30:00, 2.34e-01  
27-Jul-2017 23:45:00, 2.34e-01  
28-Jul-2017, 2.34e-01  
28-Jul-2017 00:15:00, 2.34e-01  
28-Jul-2017 00:30:00, 2.34e-01  
28-Jul-2017 00:45:00, 2.34e-01  
28-Jul-2017 01:00:00, 2.34e-01  
28-Jul-2017 01:15:00, 2.34e-01  
28-Jul-2017 01:30:00, 2.34e-01

28-Jul-2017 01:45:00, 2.34e-01  
28-Jul-2017 02:00:00, 2.34e-01  
28-Jul-2017 02:15:00, 2.34e-01  
28-Jul-2017 02:30:00, 2.34e-01  
28-Jul-2017 02:45:00, 2.34e-01  
28-Jul-2017 03:00:00, 2.34e-01  
28-Jul-2017 03:15:00, 2.34e-01  
28-Jul-2017 03:30:00, 2.34e-01  
28-Jul-2017 03:45:00, 2.34e-01  
28-Jul-2017 04:00:00, 2.34e-01  
28-Jul-2017 04:15:00, 2.34e-01  
28-Jul-2017 04:30:00, 2.34e-01  
28-Jul-2017 04:45:00, 2.34e-01  
28-Jul-2017 05:00:00, 2.34e-01  
28-Jul-2017 05:15:00, 2.34e-01  
28-Jul-2017 05:30:00, 2.34e-01  
28-Jul-2017 05:45:00, 2.34e-01  
28-Jul-2017 06:00:00, 2.34e-01  
28-Jul-2017 06:15:00, 2.34e-01  
28-Jul-2017 06:30:00, 2.34e-01  
28-Jul-2017 06:45:00, 2.34e-01  
28-Jul-2017 07:00:00, 2.34e-01  
28-Jul-2017 07:15:00, 2.34e-01  
28-Jul-2017 07:30:00, 2.34e-01  
28-Jul-2017 07:45:00, 2.34e-01  
28-Jul-2017 08:00:00, 2.34e-01  
28-Jul-2017 08:15:00, 2.34e-01  
28-Jul-2017 08:30:00, 2.34e-01  
28-Jul-2017 08:45:00, 2.34e-01  
28-Jul-2017 09:00:00, 2.34e-01  
28-Jul-2017 09:15:00, 2.33e-01  
28-Jul-2017 09:30:00, 2.34e-01  
28-Jul-2017 09:45:00, 2.33e-01  
28-Jul-2017 10:00:00, 2.33e-01  
28-Jul-2017 10:15:00, 2.33e-01  
28-Jul-2017 10:30:00, 2.33e-01  
28-Jul-2017 10:45:00, 2.33e-01  
28-Jul-2017 11:00:00, 2.33e-01  
28-Jul-2017 11:15:00, 2.33e-01  
28-Jul-2017 11:30:00, 2.33e-01  
28-Jul-2017 11:45:00, 2.33e-01  
28-Jul-2017 12:00:00, 2.33e-01  
28-Jul-2017 12:15:00, 2.33e-01  
28-Jul-2017 12:30:00, 2.33e-01  
28-Jul-2017 12:45:00, 2.33e-01  
28-Jul-2017 13:00:00, 2.33e-01  
28-Jul-2017 13:15:00, 2.33e-01  
28-Jul-2017 13:30:00, 2.33e-01  
28-Jul-2017 13:45:00, 2.33e-01  
28-Jul-2017 14:00:00, 2.33e-01  
28-Jul-2017 14:15:00, 2.33e-01  
28-Jul-2017 14:30:00, 2.33e-01  
28-Jul-2017 14:45:00, 2.33e-01  
28-Jul-2017 15:00:00, 2.33e-01  
28-Jul-2017 15:15:00, 2.33e-01  
28-Jul-2017 15:30:00, 2.33e-01  
28-Jul-2017 15:45:00, 2.33e-01  
28-Jul-2017 16:00:00, 2.33e-01  
28-Jul-2017 16:15:00, 2.33e-01  
28-Jul-2017 16:30:00, 2.33e-01  
28-Jul-2017 16:45:00, 2.33e-01  
28-Jul-2017 17:00:00, 2.33e-01  
28-Jul-2017 17:15:00, 2.33e-01  
28-Jul-2017 17:30:00, 2.33e-01

28-Jul-2017 17:45:00, 2.33e-01  
28-Jul-2017 18:00:00, 2.33e-01  
28-Jul-2017 18:15:00, 2.33e-01  
28-Jul-2017 18:30:00, 2.33e-01  
28-Jul-2017 18:45:00, 2.33e-01  
28-Jul-2017 19:00:00, 2.33e-01  
28-Jul-2017 19:15:00, 2.32e-01  
28-Jul-2017 19:30:00, 2.33e-01  
28-Jul-2017 19:45:00, 2.32e-01  
28-Jul-2017 20:00:00, 2.32e-01  
28-Jul-2017 20:15:00, 2.32e-01  
28-Jul-2017 20:30:00, 2.32e-01  
28-Jul-2017 20:45:00, 2.32e-01  
28-Jul-2017 21:00:00, 2.32e-01  
28-Jul-2017 21:15:00, 2.32e-01  
28-Jul-2017 21:30:00, 2.32e-01  
28-Jul-2017 21:45:00, 2.32e-01  
28-Jul-2017 22:00:00, 2.32e-01  
28-Jul-2017 22:15:00, 2.32e-01  
28-Jul-2017 22:30:00, 2.32e-01  
28-Jul-2017 22:45:00, 2.32e-01  
28-Jul-2017 23:00:00, 2.32e-01  
28-Jul-2017 23:15:00, 2.32e-01  
28-Jul-2017 23:30:00, 2.32e-01  
28-Jul-2017 23:45:00, 2.32e-01  
29-Jul-2017, 2.32e-01  
29-Jul-2017 00:15:00, 2.32e-01  
29-Jul-2017 00:30:00, 2.32e-01  
29-Jul-2017 00:45:00, 2.32e-01  
29-Jul-2017 01:00:00, 2.32e-01  
29-Jul-2017 01:15:00, 2.32e-01  
29-Jul-2017 01:30:00, 2.32e-01  
29-Jul-2017 01:45:00, 2.32e-01  
29-Jul-2017 02:00:00, 2.32e-01  
29-Jul-2017 02:15:00, 2.32e-01  
29-Jul-2017 02:30:00, 2.32e-01  
29-Jul-2017 02:45:00, 2.32e-01  
29-Jul-2017 03:00:00, 2.32e-01  
29-Jul-2017 03:15:00, 2.32e-01  
29-Jul-2017 03:30:00, 2.32e-01  
29-Jul-2017 03:45:00, 2.32e-01  
29-Jul-2017 04:00:00, 2.32e-01  
29-Jul-2017 04:15:00, 2.32e-01  
29-Jul-2017 04:30:00, 2.32e-01  
29-Jul-2017 04:45:00, 2.32e-01  
29-Jul-2017 05:00:00, 2.32e-01  
29-Jul-2017 05:15:00, 2.32e-01  
29-Jul-2017 05:30:00, 2.32e-01  
29-Jul-2017 05:45:00, 2.32e-01  
29-Jul-2017 06:00:00, 2.32e-01  
29-Jul-2017 06:15:00, 2.32e-01  
29-Jul-2017 06:30:00, 2.32e-01  
29-Jul-2017 06:45:00, 2.32e-01  
29-Jul-2017 07:00:00, 2.32e-01  
29-Jul-2017 07:15:00, 2.32e-01  
29-Jul-2017 07:30:00, 2.32e-01  
29-Jul-2017 07:45:00, 2.32e-01  
29-Jul-2017 08:00:00, 2.32e-01  
29-Jul-2017 08:15:00, 2.32e-01  
29-Jul-2017 08:30:00, 2.32e-01  
29-Jul-2017 08:45:00, 2.32e-01  
29-Jul-2017 09:00:00, 2.32e-01  
29-Jul-2017 09:15:00, 2.32e-01  
29-Jul-2017 09:30:00, 2.32e-01



29-Jul-2017 09:45:00, 2.32e-01  
29-Jul-2017 10:00:00, 2.32e-01  
29-Jul-2017 10:15:00, 2.32e-01  
29-Jul-2017 10:30:00, 2.32e-01  
29-Jul-2017 10:45:00, 2.32e-01  
29-Jul-2017 11:00:00, 2.32e-01  
29-Jul-2017 11:15:00, 2.32e-01  
29-Jul-2017 11:30:00, 2.32e-01  
29-Jul-2017 11:45:00, 2.32e-01  
29-Jul-2017 12:00:00, 2.31e-01  
29-Jul-2017 12:15:00, 2.31e-01  
29-Jul-2017 12:30:00, 2.31e-01  
29-Jul-2017 12:45:00, 2.31e-01  
29-Jul-2017 13:00:00, 2.31e-01  
29-Jul-2017 13:15:00, 2.31e-01  
29-Jul-2017 13:30:00, 2.31e-01  
29-Jul-2017 13:45:00, 2.31e-01  
29-Jul-2017 14:00:00, 2.31e-01  
29-Jul-2017 14:15:00, 2.31e-01  
29-Jul-2017 14:30:00, 2.31e-01  
29-Jul-2017 14:45:00, 2.31e-01  
29-Jul-2017 15:00:00, 2.31e-01  
29-Jul-2017 15:15:00, 2.31e-01  
29-Jul-2017 15:30:00, 2.31e-01  
29-Jul-2017 15:45:00, 2.31e-01  
29-Jul-2017 16:00:00, 2.31e-01  
29-Jul-2017 16:15:00, 2.31e-01  
29-Jul-2017 16:30:00, 2.31e-01  
29-Jul-2017 16:45:00, 2.31e-01  
29-Jul-2017 17:00:00, 2.31e-01  
29-Jul-2017 17:15:00, 2.31e-01  
29-Jul-2017 17:30:00, 2.31e-01  
29-Jul-2017 17:45:00, 2.31e-01  
29-Jul-2017 18:00:00, 2.31e-01  
29-Jul-2017 18:15:00, 2.31e-01  
29-Jul-2017 18:30:00, 2.31e-01  
29-Jul-2017 18:45:00, 2.31e-01  
29-Jul-2017 19:00:00, 2.31e-01  
29-Jul-2017 19:15:00, 2.31e-01  
29-Jul-2017 19:30:00, 2.31e-01  
29-Jul-2017 19:45:00, 2.31e-01  
29-Jul-2017 20:00:00, 2.31e-01  
29-Jul-2017 20:15:00, 2.31e-01  
29-Jul-2017 20:30:00, 2.31e-01  
29-Jul-2017 20:45:00, 2.31e-01  
29-Jul-2017 21:00:00, 2.31e-01  
29-Jul-2017 21:15:00, 2.31e-01  
29-Jul-2017 21:30:00, 2.31e-01  
29-Jul-2017 21:45:00, 2.31e-01  
29-Jul-2017 22:00:00, 2.31e-01  
29-Jul-2017 22:15:00, 2.31e-01  
29-Jul-2017 22:30:00, 2.31e-01  
29-Jul-2017 22:45:00, 2.31e-01  
29-Jul-2017 23:00:00, 2.31e-01  
29-Jul-2017 23:15:00, 2.31e-01  
29-Jul-2017 23:30:00, 2.31e-01  
29-Jul-2017 23:45:00, 2.31e-01  
30-Jul-2017, 2.31e-01  
30-Jul-2017 00:15:00, 2.31e-01  
30-Jul-2017 00:30:00, 2.31e-01  
30-Jul-2017 00:45:00, 2.31e-01  
30-Jul-2017 01:00:00, 2.31e-01  
30-Jul-2017 01:15:00, 2.31e-01  
30-Jul-2017 01:30:00, 2.31e-01

30-Jul-2017 01:45:00, 2.31e-01  
30-Jul-2017 02:00:00, 2.31e-01  
30-Jul-2017 02:15:00, 2.31e-01  
30-Jul-2017 02:30:00, 2.31e-01  
30-Jul-2017 02:45:00, 2.31e-01  
30-Jul-2017 03:00:00, 2.31e-01  
30-Jul-2017 03:15:00, 2.31e-01  
30-Jul-2017 03:30:00, 2.31e-01  
30-Jul-2017 03:45:00, 2.30e-01  
30-Jul-2017 04:00:00, 2.31e-01  
30-Jul-2017 04:15:00, 2.31e-01  
30-Jul-2017 04:30:00, 2.30e-01  
30-Jul-2017 04:45:00, 2.31e-01  
30-Jul-2017 05:00:00, 2.31e-01  
30-Jul-2017 05:15:00, 2.31e-01  
30-Jul-2017 05:30:00, 2.31e-01  
30-Jul-2017 05:45:00, 2.31e-01  
30-Jul-2017 06:00:00, 2.31e-01  
30-Jul-2017 06:15:00, 2.30e-01  
30-Jul-2017 06:30:00, 2.30e-01  
30-Jul-2017 06:45:00, 2.30e-01  
30-Jul-2017 07:00:00, 2.30e-01  
30-Jul-2017 07:15:00, 2.30e-01  
30-Jul-2017 07:30:00, 2.31e-01  
30-Jul-2017 07:45:00, 2.31e-01  
30-Jul-2017 08:00:00, 2.30e-01  
30-Jul-2017 08:15:00, 2.31e-01  
30-Jul-2017 08:30:00, 2.31e-01  
30-Jul-2017 08:45:00, 2.30e-01  
30-Jul-2017 09:00:00, 2.30e-01  
30-Jul-2017 09:15:00, 2.30e-01  
30-Jul-2017 09:30:00, 2.30e-01  
30-Jul-2017 09:45:00, 2.30e-01  
30-Jul-2017 10:00:00, 2.30e-01  
30-Jul-2017 10:15:00, 2.30e-01  
30-Jul-2017 10:30:00, 2.30e-01  
30-Jul-2017 10:45:00, 2.30e-01  
30-Jul-2017 11:00:00, 2.30e-01  
30-Jul-2017 11:15:00, 2.30e-01  
30-Jul-2017 11:30:00, 2.30e-01  
30-Jul-2017 11:45:00, 2.30e-01  
30-Jul-2017 12:00:00, 2.30e-01  
30-Jul-2017 12:15:00, 2.30e-01  
30-Jul-2017 12:30:00, 2.30e-01  
30-Jul-2017 12:45:00, 2.30e-01  
30-Jul-2017 13:00:00, 2.29e-01  
30-Jul-2017 13:15:00, 2.29e-01  
30-Jul-2017 13:30:00, 2.29e-01  
30-Jul-2017 13:45:00, 2.29e-01  
30-Jul-2017 14:00:00, 2.29e-01  
30-Jul-2017 14:15:00, 2.29e-01  
30-Jul-2017 14:30:00, 2.29e-01  
30-Jul-2017 14:45:00, 2.29e-01  
30-Jul-2017 15:00:00, 2.29e-01  
30-Jul-2017 15:15:00, 2.29e-01  
30-Jul-2017 15:30:00, 2.29e-01  
30-Jul-2017 15:45:00, 2.29e-01  
30-Jul-2017 16:00:00, 2.29e-01  
30-Jul-2017 16:15:00, 2.29e-01  
30-Jul-2017 16:30:00, 2.29e-01  
30-Jul-2017 16:45:00, 2.29e-01  
30-Jul-2017 17:00:00, 2.29e-01  
30-Jul-2017 17:15:00, 2.29e-01  
30-Jul-2017 17:30:00, 2.29e-01

30-Jul-2017 17:45:00, 2.29e-01  
30-Jul-2017 18:00:00, 2.29e-01  
30-Jul-2017 18:15:00, 2.29e-01  
30-Jul-2017 18:30:00, 2.29e-01  
30-Jul-2017 18:45:00, 2.29e-01  
30-Jul-2017 19:00:00, 2.29e-01  
30-Jul-2017 19:15:00, 2.29e-01  
30-Jul-2017 19:30:00, 2.29e-01  
30-Jul-2017 19:45:00, 2.29e-01  
30-Jul-2017 20:00:00, 2.29e-01  
30-Jul-2017 20:15:00, 2.29e-01  
30-Jul-2017 20:30:00, 2.29e-01  
30-Jul-2017 20:45:00, 2.29e-01  
30-Jul-2017 21:00:00, 2.29e-01  
30-Jul-2017 21:15:00, 2.29e-01  
30-Jul-2017 21:30:00, 2.29e-01  
30-Jul-2017 21:45:00, 2.29e-01  
30-Jul-2017 22:00:00, 2.29e-01  
30-Jul-2017 22:15:00, 2.29e-01  
30-Jul-2017 22:30:00, 2.29e-01  
30-Jul-2017 22:45:00, 2.29e-01  
30-Jul-2017 23:00:00, 2.29e-01  
30-Jul-2017 23:15:00, 2.29e-01  
30-Jul-2017 23:30:00, 2.29e-01  
30-Jul-2017 23:45:00, 2.29e-01  
31-Jul-2017, 2.29e-01  
31-Jul-2017 00:15:00, 2.29e-01  
31-Jul-2017 00:30:00, 2.29e-01  
31-Jul-2017 00:45:00, 2.29e-01  
31-Jul-2017 01:00:00, 2.29e-01  
31-Jul-2017 01:15:00, 2.29e-01  
31-Jul-2017 01:30:00, 2.29e-01  
31-Jul-2017 01:45:00, 2.29e-01  
31-Jul-2017 02:00:00, 2.29e-01  
31-Jul-2017 02:15:00, 2.29e-01  
31-Jul-2017 02:30:00, 2.29e-01  
31-Jul-2017 02:45:00, 2.29e-01  
31-Jul-2017 03:00:00, 2.29e-01  
31-Jul-2017 03:15:00, 2.29e-01  
31-Jul-2017 03:30:00, 2.29e-01  
31-Jul-2017 03:45:00, 2.29e-01  
31-Jul-2017 04:00:00, 2.29e-01  
31-Jul-2017 04:15:00, 2.29e-01  
31-Jul-2017 04:30:00, 2.29e-01  
31-Jul-2017 04:45:00, 2.29e-01  
31-Jul-2017 05:00:00, 2.29e-01  
31-Jul-2017 05:15:00, 2.29e-01  
31-Jul-2017 05:30:00, 2.29e-01  
31-Jul-2017 05:45:00, 2.29e-01  
31-Jul-2017 06:00:00, 2.29e-01  
31-Jul-2017 06:15:00, 2.29e-01  
31-Jul-2017 06:30:00, 2.29e-01  
31-Jul-2017 06:45:00, 2.29e-01  
31-Jul-2017 07:00:00, 2.29e-01  
31-Jul-2017 07:15:00, 2.29e-01  
31-Jul-2017 07:30:00, 2.29e-01  
31-Jul-2017 07:45:00, 2.29e-01  
31-Jul-2017 08:00:00, 2.29e-01  
31-Jul-2017 08:15:00, 2.29e-01  
31-Jul-2017 08:30:00, 2.29e-01  
31-Jul-2017 08:45:00, 2.28e-01  
31-Jul-2017 09:00:00, 2.28e-01  
31-Jul-2017 09:15:00, 2.28e-01  
31-Jul-2017 09:30:00, 2.28e-01

31-Jul-2017 09:45:00, 2.28e-01  
31-Jul-2017 10:00:00, 2.28e-01  
31-Jul-2017 10:15:00, 2.28e-01  
31-Jul-2017 10:30:00, 2.28e-01  
31-Jul-2017 10:45:00, 2.28e-01  
31-Jul-2017 11:00:00, 2.28e-01  
31-Jul-2017 11:15:00, 2.28e-01  
31-Jul-2017 11:30:00, 2.28e-01  
31-Jul-2017 11:45:00, 2.28e-01  
31-Jul-2017 12:00:00, 2.28e-01  
31-Jul-2017 12:15:00, 2.27e-01  
31-Jul-2017 12:30:00, 2.28e-01  
31-Jul-2017 12:45:00, 2.27e-01  
31-Jul-2017 13:00:00, 2.27e-01  
31-Jul-2017 13:15:00, 2.27e-01  
31-Jul-2017 13:30:00, 2.27e-01  
31-Jul-2017 13:45:00, 2.27e-01  
31-Jul-2017 14:00:00, 2.27e-01  
31-Jul-2017 14:15:00, 2.27e-01  
31-Jul-2017 14:30:00, 2.27e-01  
31-Jul-2017 14:45:00, 2.27e-01  
31-Jul-2017 15:00:00, 2.27e-01  
31-Jul-2017 15:15:00, 2.27e-01  
31-Jul-2017 15:30:00, 2.27e-01  
31-Jul-2017 15:45:00, 2.27e-01  
31-Jul-2017 16:00:00, 2.27e-01  
31-Jul-2017 16:15:00, 2.27e-01  
31-Jul-2017 16:30:00, 2.27e-01  
31-Jul-2017 16:45:00, 2.27e-01  
31-Jul-2017 17:00:00, 2.27e-01  
31-Jul-2017 17:15:00, 2.27e-01  
31-Jul-2017 17:30:00, 2.27e-01  
31-Jul-2017 17:45:00, 2.27e-01  
31-Jul-2017 18:00:00, 2.27e-01  
31-Jul-2017 18:15:00, 2.27e-01  
31-Jul-2017 18:30:00, 2.27e-01  
31-Jul-2017 18:45:00, 2.27e-01  
31-Jul-2017 19:00:00, 2.27e-01  
31-Jul-2017 19:15:00, 2.27e-01  
31-Jul-2017 19:30:00, 2.27e-01  
31-Jul-2017 19:45:00, 2.27e-01  
31-Jul-2017 20:00:00, 2.27e-01  
31-Jul-2017 20:15:00, 2.27e-01  
31-Jul-2017 20:30:00, 2.27e-01  
31-Jul-2017 20:45:00, 2.27e-01  
31-Jul-2017 21:00:00, 2.27e-01  
31-Jul-2017 21:15:00, 2.27e-01  
31-Jul-2017 21:30:00, 2.27e-01  
31-Jul-2017 21:45:00, 2.27e-01  
31-Jul-2017 22:00:00, 2.27e-01  
31-Jul-2017 22:15:00, 2.27e-01  
31-Jul-2017 22:30:00, 2.27e-01  
31-Jul-2017 22:45:00, 2.27e-01  
31-Jul-2017 23:00:00, 2.27e-01  
31-Jul-2017 23:15:00, 2.27e-01  
31-Jul-2017 23:30:00, 2.27e-01  
31-Jul-2017 23:45:00, 2.27e-01  
01-Aug-2017, 2.27e-01  
01-Aug-2017 00:15:00, 2.27e-01  
01-Aug-2017 00:30:00, 2.27e-01  
01-Aug-2017 00:45:00, 2.27e-01  
01-Aug-2017 01:00:00, 2.27e-01  
01-Aug-2017 01:15:00, 2.27e-01  
01-Aug-2017 01:30:00, 2.27e-01

|             |           |          |
|-------------|-----------|----------|
| 01-Aug-2017 | 01:45:00, | 2.27e-01 |
| 01-Aug-2017 | 02:00:00, | 2.27e-01 |
| 01-Aug-2017 | 02:15:00, | 2.27e-01 |
| 01-Aug-2017 | 02:30:00, | 2.27e-01 |
| 01-Aug-2017 | 02:45:00, | 2.27e-01 |
| 01-Aug-2017 | 03:00:00, | 2.27e-01 |
| 01-Aug-2017 | 03:15:00, | 2.27e-01 |
| 01-Aug-2017 | 03:30:00, | 2.27e-01 |
| 01-Aug-2017 | 03:45:00, | 2.27e-01 |
| 01-Aug-2017 | 04:00:00, | 2.27e-01 |
| 01-Aug-2017 | 04:15:00, | 2.27e-01 |
| 01-Aug-2017 | 04:30:00, | 2.27e-01 |
| 01-Aug-2017 | 04:45:00, | 2.27e-01 |
| 01-Aug-2017 | 05:00:00, | 2.27e-01 |
| 01-Aug-2017 | 05:15:00, | 2.27e-01 |
| 01-Aug-2017 | 05:30:00, | 2.27e-01 |
| 01-Aug-2017 | 05:45:00, | 2.27e-01 |
| 01-Aug-2017 | 06:00:00, | 2.27e-01 |
| 01-Aug-2017 | 06:15:00, | 2.27e-01 |
| 01-Aug-2017 | 06:30:00, | 2.27e-01 |
| 01-Aug-2017 | 06:45:00, | 2.27e-01 |
| 01-Aug-2017 | 07:00:00, | 2.27e-01 |
| 01-Aug-2017 | 07:15:00, | 2.27e-01 |
| 01-Aug-2017 | 07:30:00, | 2.27e-01 |
| 01-Aug-2017 | 07:45:00, | 2.27e-01 |
| 01-Aug-2017 | 08:00:00, | 2.27e-01 |
| 01-Aug-2017 | 08:15:00, | 2.27e-01 |
| 01-Aug-2017 | 08:30:00, | 2.27e-01 |
| 01-Aug-2017 | 08:45:00, | 2.27e-01 |
| 01-Aug-2017 | 09:00:00, | 2.26e-01 |
| 01-Aug-2017 | 09:15:00, | 2.26e-01 |
| 01-Aug-2017 | 09:30:00, | 2.26e-01 |
| 01-Aug-2017 | 09:45:00, | 2.26e-01 |
| 01-Aug-2017 | 10:00:00, | 2.26e-01 |
| 01-Aug-2017 | 10:15:00, | 2.26e-01 |
| 01-Aug-2017 | 10:30:00, | 2.26e-01 |
| 01-Aug-2017 | 10:45:00, | 2.26e-01 |
| 01-Aug-2017 | 11:00:00, | 2.26e-01 |
| 01-Aug-2017 | 11:15:00, | 2.26e-01 |
| 01-Aug-2017 | 11:30:00, | 2.26e-01 |
| 01-Aug-2017 | 11:45:00, | 2.26e-01 |
| 01-Aug-2017 | 12:00:00, | 2.26e-01 |
| 01-Aug-2017 | 12:15:00, | 2.26e-01 |
| 01-Aug-2017 | 12:30:00, | 2.26e-01 |
| 01-Aug-2017 | 12:45:00, | 2.26e-01 |
| 01-Aug-2017 | 13:00:00, | 2.25e-01 |
| 01-Aug-2017 | 13:15:00, | 2.25e-01 |
| 01-Aug-2017 | 13:30:00, | 2.25e-01 |
| 01-Aug-2017 | 13:45:00, | 2.25e-01 |
| 01-Aug-2017 | 14:00:00, | 2.25e-01 |
| 01-Aug-2017 | 14:15:00, | 2.25e-01 |
| 01-Aug-2017 | 14:30:00, | 2.25e-01 |
| 01-Aug-2017 | 14:45:00, | 2.25e-01 |
| 01-Aug-2017 | 15:00:00, | 2.25e-01 |
| 01-Aug-2017 | 15:15:00, | 2.25e-01 |
| 01-Aug-2017 | 15:30:00, | 2.25e-01 |
| 01-Aug-2017 | 15:45:00, | 2.25e-01 |
| 01-Aug-2017 | 16:00:00, | 2.25e-01 |
| 01-Aug-2017 | 16:15:00, | 2.25e-01 |
| 01-Aug-2017 | 16:30:00, | 2.25e-01 |
| 01-Aug-2017 | 16:45:00, | 2.25e-01 |
| 01-Aug-2017 | 17:00:00, | 2.25e-01 |
| 01-Aug-2017 | 17:15:00, | 2.25e-01 |
| 01-Aug-2017 | 17:30:00, | 2.25e-01 |

01-Aug-2017 17:45:00, 2.25e-01  
01-Aug-2017 18:00:00, 2.25e-01  
01-Aug-2017 18:15:00, 2.25e-01  
01-Aug-2017 18:30:00, 2.25e-01  
01-Aug-2017 18:45:00, 2.25e-01  
01-Aug-2017 19:00:00, 2.25e-01  
01-Aug-2017 19:15:00, 2.25e-01  
01-Aug-2017 19:30:00, 2.25e-01  
01-Aug-2017 19:45:00, 2.25e-01  
01-Aug-2017 20:00:00, 2.25e-01  
01-Aug-2017 20:15:00, 2.25e-01  
01-Aug-2017 20:30:00, 2.25e-01  
01-Aug-2017 20:45:00, 2.25e-01  
01-Aug-2017 21:00:00, 2.25e-01  
01-Aug-2017 21:15:00, 2.25e-01  
01-Aug-2017 21:30:00, 2.25e-01  
01-Aug-2017 21:45:00, 2.25e-01  
01-Aug-2017 22:00:00, 2.25e-01  
01-Aug-2017 22:15:00, 2.25e-01  
01-Aug-2017 22:30:00, 2.25e-01  
01-Aug-2017 22:45:00, 2.25e-01  
01-Aug-2017 23:00:00, 2.25e-01  
01-Aug-2017 23:15:00, 2.25e-01  
01-Aug-2017 23:30:00, 2.25e-01  
01-Aug-2017 23:45:00, 2.25e-01  
02-Aug-2017, 2.25e-01  
02-Aug-2017 00:15:00, 2.25e-01  
02-Aug-2017 00:30:00, 2.25e-01  
02-Aug-2017 00:45:00, 2.25e-01  
02-Aug-2017 01:00:00, 2.25e-01  
02-Aug-2017 01:15:00, 2.25e-01  
02-Aug-2017 01:30:00, 2.25e-01  
02-Aug-2017 01:45:00, 2.25e-01  
02-Aug-2017 02:00:00, 2.25e-01  
02-Aug-2017 02:15:00, 2.25e-01  
02-Aug-2017 02:30:00, 2.25e-01  
02-Aug-2017 02:45:00, 2.25e-01  
02-Aug-2017 03:00:00, 2.25e-01  
02-Aug-2017 03:15:00, 2.25e-01  
02-Aug-2017 03:30:00, 2.25e-01  
02-Aug-2017 03:45:00, 2.25e-01  
02-Aug-2017 04:00:00, 2.25e-01  
02-Aug-2017 04:15:00, 2.25e-01  
02-Aug-2017 04:30:00, 2.25e-01  
02-Aug-2017 04:45:00, 2.25e-01  
02-Aug-2017 05:00:00, 2.25e-01  
02-Aug-2017 05:15:00, 2.25e-01  
02-Aug-2017 05:30:00, 2.25e-01  
02-Aug-2017 05:45:00, 2.25e-01  
02-Aug-2017 06:00:00, 2.25e-01  
02-Aug-2017 06:15:00, 2.25e-01  
02-Aug-2017 06:30:00, 2.25e-01  
02-Aug-2017 06:45:00, 2.25e-01  
02-Aug-2017 07:00:00, 2.25e-01  
02-Aug-2017 07:15:00, 2.25e-01  
02-Aug-2017 07:30:00, 2.25e-01  
02-Aug-2017 07:45:00, 2.25e-01  
02-Aug-2017 08:00:00, 2.25e-01  
02-Aug-2017 08:15:00, 2.25e-01  
02-Aug-2017 08:30:00, 2.24e-01  
02-Aug-2017 08:45:00, 2.24e-01  
02-Aug-2017 09:00:00, 2.24e-01  
02-Aug-2017 09:15:00, 2.24e-01  
02-Aug-2017 09:30:00, 2.24e-01

02-Aug-2017 09:45:00, 2.24e-01  
02-Aug-2017 10:00:00, 2.24e-01  
02-Aug-2017 10:15:00, 2.24e-01  
02-Aug-2017 10:30:00, 2.24e-01  
02-Aug-2017 10:45:00, 2.24e-01  
02-Aug-2017 11:00:00, 2.24e-01  
02-Aug-2017 11:15:00, 2.23e-01  
02-Aug-2017 11:30:00, 2.23e-01  
02-Aug-2017 11:45:00, 2.23e-01  
02-Aug-2017 12:00:00, 2.23e-01  
02-Aug-2017 12:15:00, 2.23e-01  
02-Aug-2017 12:30:00, 2.23e-01  
02-Aug-2017 12:45:00, 2.23e-01  
02-Aug-2017 13:00:00, 2.23e-01  
02-Aug-2017 13:15:00, 2.23e-01  
02-Aug-2017 13:30:00, 2.23e-01  
02-Aug-2017 13:45:00, 2.23e-01  
02-Aug-2017 14:00:00, 2.23e-01  
02-Aug-2017 14:15:00, 2.23e-01  
02-Aug-2017 14:30:00, 2.23e-01  
02-Aug-2017 14:45:00, 2.23e-01  
02-Aug-2017 15:00:00, 2.23e-01  
02-Aug-2017 15:15:00, 2.23e-01  
02-Aug-2017 15:30:00, 2.23e-01  
02-Aug-2017 15:45:00, 2.23e-01  
02-Aug-2017 16:00:00, 2.23e-01  
02-Aug-2017 16:15:00, 2.23e-01  
02-Aug-2017 16:30:00, 2.23e-01  
02-Aug-2017 16:45:00, 2.23e-01  
02-Aug-2017 17:00:00, 2.23e-01  
02-Aug-2017 17:15:00, 2.23e-01  
02-Aug-2017 17:30:00, 2.23e-01  
02-Aug-2017 17:45:00, 2.23e-01  
02-Aug-2017 18:00:00, 2.23e-01  
02-Aug-2017 18:15:00, 2.23e-01  
02-Aug-2017 18:30:00, 2.23e-01  
02-Aug-2017 18:45:00, 2.23e-01  
02-Aug-2017 19:00:00, 2.23e-01  
02-Aug-2017 19:15:00, 2.23e-01  
02-Aug-2017 19:30:00, 2.23e-01  
02-Aug-2017 19:45:00, 2.23e-01  
02-Aug-2017 20:00:00, 2.23e-01  
02-Aug-2017 20:15:00, 2.23e-01  
02-Aug-2017 20:30:00, 2.23e-01  
02-Aug-2017 20:45:00, 2.23e-01  
02-Aug-2017 21:00:00, 2.23e-01  
02-Aug-2017 21:15:00, 2.23e-01  
02-Aug-2017 21:30:00, 2.23e-01  
02-Aug-2017 21:45:00, 2.23e-01  
02-Aug-2017 22:00:00, 2.23e-01  
02-Aug-2017 22:15:00, 2.23e-01  
02-Aug-2017 22:30:00, 2.23e-01  
02-Aug-2017 22:45:00, 2.23e-01  
02-Aug-2017 23:00:00, 2.23e-01  
02-Aug-2017 23:15:00, 2.23e-01  
02-Aug-2017 23:30:00, 2.23e-01  
02-Aug-2017 23:45:00, 2.23e-01  
03-Aug-2017, 2.23e-01  
03-Aug-2017 00:15:00, 2.23e-01  
03-Aug-2017 00:30:00, 2.23e-01  
03-Aug-2017 00:45:00, 2.23e-01  
03-Aug-2017 01:00:00, 2.23e-01  
03-Aug-2017 01:15:00, 2.23e-01  
03-Aug-2017 01:30:00, 2.23e-01

03-Aug-2017 01:45:00, 2.23e-01  
03-Aug-2017 02:00:00, 2.23e-01  
03-Aug-2017 02:15:00, 2.23e-01  
03-Aug-2017 02:30:00, 2.23e-01  
03-Aug-2017 02:45:00, 2.23e-01  
03-Aug-2017 03:00:00, 2.23e-01  
03-Aug-2017 03:15:00, 2.23e-01  
03-Aug-2017 03:30:00, 2.23e-01  
03-Aug-2017 03:45:00, 2.23e-01  
03-Aug-2017 04:00:00, 2.23e-01  
03-Aug-2017 04:15:00, 2.23e-01  
03-Aug-2017 04:30:00, 2.23e-01  
03-Aug-2017 04:45:00, 2.23e-01  
03-Aug-2017 05:00:00, 2.23e-01  
03-Aug-2017 05:15:00, 2.23e-01  
03-Aug-2017 05:30:00, 2.23e-01  
03-Aug-2017 05:45:00, 2.23e-01  
03-Aug-2017 06:00:00, 2.23e-01  
03-Aug-2017 06:15:00, 2.23e-01  
03-Aug-2017 06:30:00, 2.23e-01  
03-Aug-2017 06:45:00, 2.22e-01  
03-Aug-2017 07:00:00, 2.22e-01  
03-Aug-2017 07:15:00, 2.22e-01  
03-Aug-2017 07:30:00, 2.22e-01  
03-Aug-2017 07:45:00, 2.22e-01  
03-Aug-2017 08:00:00, 2.22e-01  
03-Aug-2017 08:15:00, 2.22e-01  
03-Aug-2017 08:30:00, 2.22e-01  
03-Aug-2017 08:45:00, 2.22e-01  
03-Aug-2017 09:00:00, 2.22e-01  
03-Aug-2017 09:15:00, 2.22e-01  
03-Aug-2017 09:30:00, 2.22e-01  
03-Aug-2017 09:45:00, 2.22e-01  
03-Aug-2017 10:00:00, 2.22e-01  
03-Aug-2017 10:15:00, 2.22e-01  
03-Aug-2017 10:30:00, 2.22e-01  
03-Aug-2017 10:45:00, 2.22e-01  
03-Aug-2017 11:00:00, 2.22e-01  
03-Aug-2017 11:15:00, 2.22e-01  
03-Aug-2017 11:30:00, 2.22e-01  
03-Aug-2017 11:45:00, 2.22e-01  
03-Aug-2017 12:00:00, 2.21e-01  
03-Aug-2017 12:15:00, 2.21e-01  
03-Aug-2017 12:30:00, 2.21e-01  
03-Aug-2017 12:45:00, 2.21e-01  
03-Aug-2017 13:00:00, 2.21e-01  
03-Aug-2017 13:15:00, 2.21e-01  
03-Aug-2017 13:30:00, 2.21e-01  
03-Aug-2017 13:45:00, 2.21e-01  
03-Aug-2017 14:00:00, 2.21e-01  
03-Aug-2017 14:15:00, 2.21e-01  
03-Aug-2017 14:30:00, 2.21e-01  
03-Aug-2017 14:45:00, 2.21e-01  
03-Aug-2017 15:00:00, 2.21e-01  
03-Aug-2017 15:15:00, 2.21e-01  
03-Aug-2017 15:30:00, 2.21e-01  
03-Aug-2017 15:45:00, 2.21e-01  
03-Aug-2017 16:00:00, 2.21e-01  
03-Aug-2017 16:15:00, 2.21e-01  
03-Aug-2017 16:30:00, 2.21e-01  
03-Aug-2017 16:45:00, 2.21e-01  
03-Aug-2017 17:00:00, 2.21e-01  
03-Aug-2017 17:15:00, 2.21e-01  
03-Aug-2017 17:30:00, 2.21e-01



03-Aug-2017 17:45:00, 2.21e-01  
03-Aug-2017 18:00:00, 2.21e-01  
03-Aug-2017 18:15:00, 2.21e-01  
03-Aug-2017 18:30:00, 2.21e-01  
03-Aug-2017 18:45:00, 2.21e-01  
03-Aug-2017 19:00:00, 2.21e-01  
03-Aug-2017 19:15:00, 2.21e-01  
03-Aug-2017 19:30:00, 2.21e-01  
03-Aug-2017 19:45:00, 2.21e-01  
03-Aug-2017 20:00:00, 2.21e-01  
03-Aug-2017 20:15:00, 2.21e-01  
03-Aug-2017 20:30:00, 2.21e-01  
03-Aug-2017 20:45:00, 2.21e-01  
03-Aug-2017 21:00:00, 2.21e-01  
03-Aug-2017 21:15:00, 2.21e-01  
03-Aug-2017 21:30:00, 2.21e-01  
03-Aug-2017 21:45:00, 2.21e-01  
03-Aug-2017 22:00:00, 2.21e-01  
03-Aug-2017 22:15:00, 2.21e-01  
03-Aug-2017 22:30:00, 2.21e-01  
03-Aug-2017 22:45:00, 2.21e-01  
03-Aug-2017 23:00:00, 2.21e-01  
03-Aug-2017 23:15:00, 2.21e-01  
03-Aug-2017 23:30:00, 2.21e-01  
03-Aug-2017 23:45:00, 2.21e-01  
04-Aug-2017, 2.21e-01  
04-Aug-2017 00:15:00, 2.21e-01  
04-Aug-2017 00:30:00, 2.21e-01  
04-Aug-2017 00:45:00, 2.21e-01  
04-Aug-2017 01:00:00, 2.21e-01  
04-Aug-2017 01:15:00, 2.21e-01  
04-Aug-2017 01:30:00, 2.21e-01  
04-Aug-2017 01:45:00, 2.21e-01  
04-Aug-2017 02:00:00, 2.21e-01  
04-Aug-2017 02:15:00, 2.21e-01  
04-Aug-2017 02:30:00, 2.21e-01  
04-Aug-2017 02:45:00, 2.21e-01  
04-Aug-2017 03:00:00, 2.21e-01  
04-Aug-2017 03:15:00, 2.21e-01  
04-Aug-2017 03:30:00, 2.21e-01  
04-Aug-2017 03:45:00, 2.21e-01  
04-Aug-2017 04:00:00, 2.21e-01  
04-Aug-2017 04:15:00, 2.21e-01  
04-Aug-2017 04:30:00, 2.21e-01  
04-Aug-2017 04:45:00, 2.21e-01  
04-Aug-2017 05:00:00, 2.21e-01  
04-Aug-2017 05:15:00, 2.21e-01  
04-Aug-2017 05:30:00, 2.21e-01  
04-Aug-2017 05:45:00, 2.21e-01  
04-Aug-2017 06:00:00, 2.21e-01  
04-Aug-2017 06:15:00, 2.21e-01  
04-Aug-2017 06:30:00, 2.21e-01  
04-Aug-2017 06:45:00, 2.21e-01  
04-Aug-2017 07:00:00, 2.21e-01  
04-Aug-2017 07:15:00, 2.21e-01  
04-Aug-2017 07:30:00, 2.21e-01  
04-Aug-2017 07:45:00, 2.21e-01  
04-Aug-2017 08:00:00, 2.21e-01  
04-Aug-2017 08:15:00, 2.21e-01  
04-Aug-2017 08:30:00, 2.21e-01  
04-Aug-2017 08:45:00, 2.20e-01  
04-Aug-2017 09:00:00, 2.20e-01  
04-Aug-2017 09:15:00, 2.20e-01  
04-Aug-2017 09:30:00, 2.20e-01

04-Aug-2017 09:45:00, 2.20e-01  
04-Aug-2017 10:00:00, 2.20e-01  
04-Aug-2017 10:15:00, 2.20e-01  
04-Aug-2017 10:30:00, 2.20e-01  
04-Aug-2017 10:45:00, 2.20e-01  
04-Aug-2017 11:00:00, 2.20e-01  
04-Aug-2017 11:15:00, 2.20e-01  
04-Aug-2017 11:30:00, 2.20e-01  
04-Aug-2017 11:45:00, 2.20e-01  
04-Aug-2017 12:00:00, 2.20e-01  
04-Aug-2017 12:15:00, 2.20e-01  
04-Aug-2017 12:30:00, 2.20e-01  
04-Aug-2017 12:45:00, 2.20e-01  
04-Aug-2017 13:00:00, 2.20e-01  
04-Aug-2017 13:15:00, 2.20e-01  
04-Aug-2017 13:30:00, 2.20e-01  
04-Aug-2017 13:45:00, 2.20e-01  
04-Aug-2017 14:00:00, 2.20e-01  
04-Aug-2017 14:15:00, 2.20e-01  
04-Aug-2017 14:30:00, 2.20e-01  
04-Aug-2017 14:45:00, 2.20e-01  
04-Aug-2017 15:00:00, 2.20e-01  
04-Aug-2017 15:15:00, 2.20e-01  
04-Aug-2017 15:30:00, 2.20e-01  
04-Aug-2017 15:45:00, 2.20e-01  
04-Aug-2017 16:00:00, 2.20e-01  
04-Aug-2017 16:15:00, 2.20e-01  
04-Aug-2017 16:30:00, 2.20e-01  
04-Aug-2017 16:45:00, 2.20e-01  
04-Aug-2017 17:00:00, 2.20e-01  
04-Aug-2017 17:15:00, 2.20e-01  
04-Aug-2017 17:30:00, 2.20e-01  
04-Aug-2017 17:45:00, 2.20e-01  
04-Aug-2017 18:00:00, 2.20e-01  
04-Aug-2017 18:15:00, 2.20e-01  
04-Aug-2017 18:30:00, 2.20e-01  
04-Aug-2017 18:45:00, 2.20e-01  
04-Aug-2017 19:00:00, 2.20e-01  
04-Aug-2017 19:15:00, 2.20e-01  
04-Aug-2017 19:30:00, 2.20e-01  
04-Aug-2017 19:45:00, 2.20e-01  
04-Aug-2017 20:00:00, 2.20e-01  
04-Aug-2017 20:15:00, 2.20e-01  
04-Aug-2017 20:30:00, 2.20e-01  
04-Aug-2017 20:45:00, 2.20e-01  
04-Aug-2017 21:00:00, 2.20e-01  
04-Aug-2017 21:15:00, 2.20e-01  
04-Aug-2017 21:30:00, 2.20e-01  
04-Aug-2017 21:45:00, 2.20e-01  
04-Aug-2017 22:00:00, 2.20e-01  
04-Aug-2017 22:15:00, 2.20e-01  
04-Aug-2017 22:30:00, 2.20e-01  
04-Aug-2017 22:45:00, 2.20e-01  
04-Aug-2017 23:00:00, 2.20e-01  
04-Aug-2017 23:15:00, 2.20e-01  
04-Aug-2017 23:30:00, 2.20e-01  
04-Aug-2017 23:45:00, 2.20e-01  
05-Aug-2017, 2.20e-01  
05-Aug-2017 00:15:00, 2.20e-01  
05-Aug-2017 00:30:00, 2.20e-01  
05-Aug-2017 00:45:00, 2.20e-01  
05-Aug-2017 01:00:00, 2.20e-01  
05-Aug-2017 01:15:00, 2.20e-01  
05-Aug-2017 01:30:00, 2.20e-01

|             |           |          |
|-------------|-----------|----------|
| 05-Aug-2017 | 01:45:00, | 2.20e-01 |
| 05-Aug-2017 | 02:00:00, | 2.21e-01 |
| 05-Aug-2017 | 02:15:00, | 2.20e-01 |
| 05-Aug-2017 | 02:30:00, | 2.20e-01 |
| 05-Aug-2017 | 02:45:00, | 2.20e-01 |
| 05-Aug-2017 | 03:00:00, | 2.20e-01 |
| 05-Aug-2017 | 03:15:00, | 2.20e-01 |
| 05-Aug-2017 | 03:30:00, | 2.20e-01 |
| 05-Aug-2017 | 03:45:00, | 2.20e-01 |
| 05-Aug-2017 | 04:00:00, | 2.20e-01 |
| 05-Aug-2017 | 04:15:00, | 2.20e-01 |
| 05-Aug-2017 | 04:30:00, | 2.20e-01 |
| 05-Aug-2017 | 04:45:00, | 2.20e-01 |
| 05-Aug-2017 | 05:00:00, | 2.20e-01 |
| 05-Aug-2017 | 05:15:00, | 2.20e-01 |
| 05-Aug-2017 | 05:30:00, | 2.20e-01 |
| 05-Aug-2017 | 05:45:00, | 2.20e-01 |
| 05-Aug-2017 | 06:00:00, | 2.20e-01 |
| 05-Aug-2017 | 06:15:00, | 2.20e-01 |
| 05-Aug-2017 | 06:30:00, | 2.20e-01 |
| 05-Aug-2017 | 06:45:00, | 2.20e-01 |
| 05-Aug-2017 | 07:00:00, | 2.20e-01 |
| 05-Aug-2017 | 07:15:00, | 2.20e-01 |
| 05-Aug-2017 | 07:30:00, | 2.20e-01 |
| 05-Aug-2017 | 07:45:00, | 2.20e-01 |
| 05-Aug-2017 | 08:00:00, | 2.20e-01 |
| 05-Aug-2017 | 08:15:00, | 2.20e-01 |
| 05-Aug-2017 | 08:30:00, | 2.20e-01 |
| 05-Aug-2017 | 08:45:00, | 2.20e-01 |
| 05-Aug-2017 | 09:00:00, | 2.20e-01 |
| 05-Aug-2017 | 09:15:00, | 2.20e-01 |
| 05-Aug-2017 | 09:30:00, | 2.20e-01 |
| 05-Aug-2017 | 09:45:00, | 2.20e-01 |
| 05-Aug-2017 | 10:00:00, | 2.20e-01 |
| 05-Aug-2017 | 10:15:00, | 2.20e-01 |
| 05-Aug-2017 | 10:30:00, | 2.20e-01 |
| 05-Aug-2017 | 10:45:00, | 2.20e-01 |
| 05-Aug-2017 | 11:00:00, | 2.20e-01 |
| 05-Aug-2017 | 11:15:00, | 2.20e-01 |
| 05-Aug-2017 | 11:30:00, | 2.20e-01 |
| 05-Aug-2017 | 11:45:00, | 2.20e-01 |
| 05-Aug-2017 | 12:00:00, | 2.20e-01 |
| 05-Aug-2017 | 12:15:00, | 2.20e-01 |
| 05-Aug-2017 | 12:30:00, | 2.20e-01 |
| 05-Aug-2017 | 12:45:00, | 2.20e-01 |
| 05-Aug-2017 | 13:00:00, | 2.20e-01 |
| 05-Aug-2017 | 13:15:00, | 2.19e-01 |
| 05-Aug-2017 | 13:30:00, | 2.19e-01 |
| 05-Aug-2017 | 13:45:00, | 2.20e-01 |
| 05-Aug-2017 | 14:00:00, | 2.20e-01 |
| 05-Aug-2017 | 14:15:00, | 2.20e-01 |
| 05-Aug-2017 | 14:30:00, | 2.19e-01 |
| 05-Aug-2017 | 14:45:00, | 2.19e-01 |
| 05-Aug-2017 | 15:00:00, | 2.19e-01 |
| 05-Aug-2017 | 15:15:00, | 2.19e-01 |
| 05-Aug-2017 | 15:30:00, | 2.19e-01 |
| 05-Aug-2017 | 15:45:00, | 2.19e-01 |
| 05-Aug-2017 | 16:00:00, | 2.19e-01 |
| 05-Aug-2017 | 16:15:00, | 2.19e-01 |
| 05-Aug-2017 | 16:30:00, | 2.19e-01 |
| 05-Aug-2017 | 16:45:00, | 2.19e-01 |
| 05-Aug-2017 | 17:00:00, | 2.19e-01 |
| 05-Aug-2017 | 17:15:00, | 2.19e-01 |
| 05-Aug-2017 | 17:30:00, | 2.19e-01 |

05-Aug-2017 17:45:00, 2.19e-01  
05-Aug-2017 18:00:00, 2.19e-01  
05-Aug-2017 18:15:00, 2.19e-01  
05-Aug-2017 18:30:00, 2.19e-01  
05-Aug-2017 18:45:00, 2.19e-01  
05-Aug-2017 19:00:00, 2.19e-01  
05-Aug-2017 19:15:00, 2.19e-01  
05-Aug-2017 19:30:00, 2.19e-01  
05-Aug-2017 19:45:00, 2.19e-01  
05-Aug-2017 20:00:00, 2.19e-01  
05-Aug-2017 20:15:00, 2.20e-01  
05-Aug-2017 20:30:00, 2.19e-01  
05-Aug-2017 20:45:00, 2.19e-01  
05-Aug-2017 21:00:00, 2.19e-01  
05-Aug-2017 21:15:00, 2.20e-01  
05-Aug-2017 21:30:00, 2.20e-01  
05-Aug-2017 21:45:00, 2.20e-01  
05-Aug-2017 22:00:00, 2.20e-01  
05-Aug-2017 22:15:00, 2.20e-01  
05-Aug-2017 22:30:00, 2.20e-01  
05-Aug-2017 22:45:00, 2.20e-01  
05-Aug-2017 23:00:00, 2.20e-01  
05-Aug-2017 23:15:00, 2.20e-01  
05-Aug-2017 23:30:00, 2.20e-01  
05-Aug-2017 23:45:00, 2.20e-01  
06-Aug-2017, 2.20e-01  
06-Aug-2017 00:15:00, 2.20e-01  
06-Aug-2017 00:30:00, 2.20e-01  
06-Aug-2017 00:45:00, 2.20e-01  
06-Aug-2017 01:00:00, 2.20e-01  
06-Aug-2017 01:15:00, 2.20e-01  
06-Aug-2017 01:30:00, 2.20e-01  
06-Aug-2017 01:45:00, 2.20e-01  
06-Aug-2017 02:00:00, 2.20e-01  
06-Aug-2017 02:15:00, 2.20e-01  
06-Aug-2017 02:30:00, 2.20e-01  
06-Aug-2017 02:45:00, 2.20e-01  
06-Aug-2017 03:00:00, 2.20e-01  
06-Aug-2017 03:15:00, 2.20e-01  
06-Aug-2017 03:30:00, 2.20e-01  
06-Aug-2017 03:45:00, 2.20e-01  
06-Aug-2017 04:00:00, 2.20e-01  
06-Aug-2017 04:15:00, 2.20e-01  
06-Aug-2017 04:30:00, 2.20e-01  
06-Aug-2017 04:45:00, 2.20e-01  
06-Aug-2017 05:00:00, 2.20e-01  
06-Aug-2017 05:15:00, 2.20e-01  
06-Aug-2017 05:30:00, 2.20e-01  
06-Aug-2017 05:45:00, 2.20e-01  
06-Aug-2017 06:00:00, 2.19e-01  
06-Aug-2017 06:15:00, 2.19e-01  
06-Aug-2017 06:30:00, 2.20e-01  
06-Aug-2017 06:45:00, 2.19e-01  
06-Aug-2017 07:00:00, 2.19e-01  
06-Aug-2017 07:15:00, 2.20e-01  
06-Aug-2017 07:30:00, 2.19e-01  
06-Aug-2017 07:45:00, 2.19e-01  
06-Aug-2017 08:00:00, 2.19e-01  
06-Aug-2017 08:15:00, 2.19e-01  
06-Aug-2017 08:30:00, 2.19e-01  
06-Aug-2017 08:45:00, 2.19e-01  
06-Aug-2017 09:00:00, 2.19e-01  
06-Aug-2017 09:15:00, 2.19e-01  
06-Aug-2017 09:30:00, 2.19e-01

06-Aug-2017 09:45:00, 2.19e-01  
06-Aug-2017 10:00:00, 2.18e-01  
06-Aug-2017 10:15:00, 2.18e-01  
06-Aug-2017 10:30:00, 2.18e-01  
06-Aug-2017 10:45:00, 2.18e-01  
06-Aug-2017 11:00:00, 2.18e-01  
06-Aug-2017 11:15:00, 2.19e-01  
06-Aug-2017 11:30:00, 2.19e-01  
06-Aug-2017 11:45:00, 2.19e-01  
06-Aug-2017 12:00:00, 2.19e-01  
06-Aug-2017 12:15:00, 2.19e-01  
06-Aug-2017 12:30:00, 2.18e-01  
06-Aug-2017 12:45:00, 2.18e-01  
06-Aug-2017 13:00:00, 2.19e-01  
06-Aug-2017 13:15:00, 2.18e-01  
06-Aug-2017 13:30:00, 2.18e-01  
06-Aug-2017 13:45:00, 2.19e-01  
06-Aug-2017 14:00:00, 2.18e-01  
06-Aug-2017 14:15:00, 2.18e-01  
06-Aug-2017 14:30:00, 2.18e-01  
06-Aug-2017 14:45:00, 2.18e-01  
06-Aug-2017 15:00:00, 2.18e-01  
06-Aug-2017 15:15:00, 2.18e-01  
06-Aug-2017 15:30:00, 2.18e-01  
06-Aug-2017 15:45:00, 2.18e-01  
06-Aug-2017 16:00:00, 2.18e-01  
06-Aug-2017 16:15:00, 2.18e-01  
06-Aug-2017 16:30:00, 2.18e-01  
06-Aug-2017 16:45:00, 2.18e-01  
06-Aug-2017 17:00:00, 2.18e-01  
06-Aug-2017 17:15:00, 2.18e-01  
06-Aug-2017 17:30:00, 2.19e-01  
06-Aug-2017 17:45:00, 2.19e-01  
06-Aug-2017 18:00:00, 2.19e-01  
06-Aug-2017 18:15:00, 2.19e-01  
06-Aug-2017 18:30:00, 2.19e-01  
06-Aug-2017 18:45:00, 2.19e-01  
06-Aug-2017 19:00:00, 2.19e-01  
06-Aug-2017 19:15:00, 2.19e-01  
06-Aug-2017 19:30:00, 2.19e-01  
06-Aug-2017 19:45:00, 2.19e-01  
06-Aug-2017 20:00:00, 2.19e-01  
06-Aug-2017 20:15:00, 2.19e-01  
06-Aug-2017 20:30:00, 2.19e-01  
06-Aug-2017 20:45:00, 2.19e-01  
06-Aug-2017 21:00:00, 2.19e-01  
06-Aug-2017 21:15:00, 2.19e-01  
06-Aug-2017 21:30:00, 2.19e-01  
06-Aug-2017 21:45:00, 2.19e-01  
06-Aug-2017 22:00:00, 2.19e-01  
06-Aug-2017 22:15:00, 2.19e-01  
06-Aug-2017 22:30:00, 2.19e-01  
06-Aug-2017 22:45:00, 2.19e-01  
06-Aug-2017 23:00:00, 2.19e-01  
06-Aug-2017 23:15:00, 2.19e-01  
06-Aug-2017 23:30:00, 2.19e-01  
06-Aug-2017 23:45:00, 2.19e-01  
07-Aug-2017, 2.19e-01  
07-Aug-2017 00:15:00, 2.19e-01  
07-Aug-2017 00:30:00, 2.19e-01  
07-Aug-2017 00:45:00, 2.19e-01  
07-Aug-2017 01:00:00, 2.19e-01  
07-Aug-2017 01:15:00, 2.19e-01  
07-Aug-2017 01:30:00, 2.19e-01

07-Aug-2017 01:45:00, 2.19e-01  
07-Aug-2017 02:00:00, 2.19e-01  
07-Aug-2017 02:15:00, 2.19e-01  
07-Aug-2017 02:30:00, 2.19e-01  
07-Aug-2017 02:45:00, 2.19e-01  
07-Aug-2017 03:00:00, 2.19e-01  
07-Aug-2017 03:15:00, 2.19e-01  
07-Aug-2017 03:30:00, 2.19e-01  
07-Aug-2017 03:45:00, 2.19e-01  
07-Aug-2017 04:00:00, 2.19e-01  
07-Aug-2017 04:15:00, 2.19e-01  
07-Aug-2017 04:30:00, 2.19e-01  
07-Aug-2017 04:45:00, 2.19e-01  
07-Aug-2017 05:00:00, 2.19e-01  
07-Aug-2017 05:15:00, 2.19e-01  
07-Aug-2017 05:30:00, 2.19e-01  
07-Aug-2017 05:45:00, 2.19e-01  
07-Aug-2017 06:00:00, 2.19e-01  
07-Aug-2017 06:15:00, 2.19e-01  
07-Aug-2017 06:30:00, 2.19e-01  
07-Aug-2017 06:45:00, 2.19e-01  
07-Aug-2017 07:00:00, 2.19e-01  
07-Aug-2017 07:15:00, 2.19e-01  
07-Aug-2017 07:30:00, 2.19e-01  
07-Aug-2017 07:45:00, 2.19e-01  
07-Aug-2017 08:00:00, 2.19e-01  
07-Aug-2017 08:15:00, 2.19e-01  
07-Aug-2017 08:30:00, 2.19e-01  
07-Aug-2017 08:45:00, 2.19e-01  
07-Aug-2017 09:00:00, 2.19e-01  
07-Aug-2017 09:15:00, 2.19e-01  
07-Aug-2017 09:30:00, 2.18e-01  
07-Aug-2017 09:45:00, 2.18e-01  
07-Aug-2017 10:00:00, 2.18e-01  
07-Aug-2017 10:15:00, 2.18e-01  
07-Aug-2017 10:30:00, 2.18e-01  
07-Aug-2017 10:45:00, 2.18e-01  
07-Aug-2017 11:00:00, 2.18e-01  
07-Aug-2017 11:15:00, 2.18e-01  
07-Aug-2017 11:30:00, 2.18e-01  
07-Aug-2017 11:45:00, 2.18e-01  
07-Aug-2017 12:00:00, 2.18e-01  
07-Aug-2017 12:15:00, 2.18e-01  
07-Aug-2017 12:30:00, 2.18e-01  
07-Aug-2017 12:45:00, 2.18e-01  
07-Aug-2017 13:00:00, 2.18e-01  
07-Aug-2017 13:15:00, 2.18e-01  
07-Aug-2017 13:30:00, 2.18e-01  
07-Aug-2017 13:45:00, 2.18e-01  
07-Aug-2017 14:00:00, 2.18e-01  
07-Aug-2017 14:15:00, 2.18e-01  
07-Aug-2017 14:30:00, 2.18e-01  
07-Aug-2017 14:45:00, 2.18e-01  
07-Aug-2017 15:00:00, 2.18e-01  
07-Aug-2017 15:15:00, 2.18e-01  
07-Aug-2017 15:30:00, 2.18e-01  
07-Aug-2017 15:45:00, 2.18e-01  
07-Aug-2017 16:00:00, 2.18e-01  
07-Aug-2017 16:15:00, 2.18e-01  
07-Aug-2017 16:30:00, 2.18e-01  
07-Aug-2017 16:45:00, 2.18e-01  
07-Aug-2017 17:00:00, 2.18e-01  
07-Aug-2017 17:15:00, 2.18e-01  
07-Aug-2017 17:30:00, 2.18e-01

07-Aug-2017 17:45:00, 2.18e-01  
07-Aug-2017 18:00:00, 2.18e-01  
07-Aug-2017 18:15:00, 2.18e-01  
07-Aug-2017 18:30:00, 2.18e-01  
07-Aug-2017 18:45:00, 2.18e-01  
07-Aug-2017 19:00:00, 2.18e-01  
07-Aug-2017 19:15:00, 2.18e-01  
07-Aug-2017 19:30:00, 2.18e-01  
07-Aug-2017 19:45:00, 2.18e-01  
07-Aug-2017 20:00:00, 2.18e-01  
07-Aug-2017 20:15:00, 2.18e-01  
07-Aug-2017 20:30:00, 2.18e-01  
07-Aug-2017 20:45:00, 2.18e-01  
07-Aug-2017 21:00:00, 2.18e-01  
07-Aug-2017 21:15:00, 2.18e-01  
07-Aug-2017 21:30:00, 2.18e-01  
07-Aug-2017 21:45:00, 2.18e-01  
07-Aug-2017 22:00:00, 2.18e-01  
07-Aug-2017 22:15:00, 2.17e-01  
07-Aug-2017 22:30:00, 2.17e-01  
07-Aug-2017 22:45:00, 2.18e-01  
07-Aug-2017 23:00:00, 2.17e-01  
07-Aug-2017 23:15:00, 2.18e-01  
07-Aug-2017 23:30:00, 2.17e-01  
07-Aug-2017 23:45:00, 2.17e-01  
08-Aug-2017, 2.17e-01  
08-Aug-2017 00:15:00, 2.17e-01  
08-Aug-2017 00:30:00, 2.17e-01  
08-Aug-2017 00:45:00, 2.17e-01  
08-Aug-2017 01:00:00, 2.17e-01  
08-Aug-2017 01:15:00, 2.17e-01  
08-Aug-2017 01:30:00, 2.17e-01  
08-Aug-2017 01:45:00, 2.17e-01  
08-Aug-2017 02:00:00, 2.17e-01  
08-Aug-2017 02:15:00, 2.17e-01  
08-Aug-2017 02:30:00, 2.17e-01  
08-Aug-2017 02:45:00, 2.17e-01  
08-Aug-2017 03:00:00, 2.17e-01  
08-Aug-2017 03:15:00, 2.17e-01  
08-Aug-2017 03:30:00, 2.17e-01  
08-Aug-2017 03:45:00, 2.17e-01  
08-Aug-2017 04:00:00, 2.17e-01  
08-Aug-2017 04:15:00, 2.17e-01  
08-Aug-2017 04:30:00, 2.17e-01  
08-Aug-2017 04:45:00, 2.17e-01  
08-Aug-2017 05:00:00, 2.17e-01  
08-Aug-2017 05:15:00, 2.17e-01  
08-Aug-2017 05:30:00, 2.17e-01  
08-Aug-2017 05:45:00, 2.17e-01  
08-Aug-2017 06:00:00, 2.17e-01  
08-Aug-2017 06:15:00, 2.17e-01  
08-Aug-2017 06:30:00, 2.17e-01  
08-Aug-2017 06:45:00, 2.17e-01  
08-Aug-2017 07:00:00, 2.17e-01  
08-Aug-2017 07:15:00, 2.17e-01  
08-Aug-2017 07:30:00, 2.17e-01  
08-Aug-2017 07:45:00, 2.17e-01  
08-Aug-2017 08:00:00, 2.17e-01  
08-Aug-2017 08:15:00, 2.17e-01  
08-Aug-2017 08:30:00, 2.17e-01  
08-Aug-2017 08:45:00, 2.17e-01  
08-Aug-2017 09:00:00, 2.17e-01  
08-Aug-2017 09:15:00, 2.17e-01  
08-Aug-2017 09:30:00, 2.17e-01

08-Aug-2017 09:45:00, 2.17e-01  
08-Aug-2017 10:00:00, 2.17e-01  
08-Aug-2017 10:15:00, 2.17e-01  
08-Aug-2017 10:30:00, 2.17e-01  
08-Aug-2017 10:45:00, 2.17e-01  
08-Aug-2017 11:00:00, 2.17e-01  
08-Aug-2017 11:15:00, 2.17e-01  
08-Aug-2017 11:30:00, 2.16e-01  
08-Aug-2017 11:45:00, 2.17e-01  
08-Aug-2017 12:00:00, 2.16e-01  
08-Aug-2017 12:15:00, 2.17e-01  
08-Aug-2017 12:30:00, 2.17e-01  
08-Aug-2017 12:45:00, 2.17e-01  
08-Aug-2017 13:00:00, 2.17e-01  
08-Aug-2017 13:15:00, 2.16e-01  
08-Aug-2017 13:30:00, 2.17e-01  
08-Aug-2017 13:45:00, 2.16e-01  
08-Aug-2017 14:00:00, 2.17e-01  
08-Aug-2017 14:15:00, 2.17e-01  
08-Aug-2017 14:30:00, 2.17e-01  
08-Aug-2017 14:45:00, 2.17e-01  
08-Aug-2017 15:00:00, 2.17e-01  
08-Aug-2017 15:15:00, 2.16e-01  
08-Aug-2017 15:30:00, 2.17e-01  
08-Aug-2017 15:45:00, 2.16e-01  
08-Aug-2017 16:00:00, 2.16e-01  
08-Aug-2017 16:15:00, 2.16e-01  
08-Aug-2017 16:30:00, 2.16e-01  
08-Aug-2017 16:45:00, 2.17e-01  
08-Aug-2017 17:00:00, 2.16e-01  
08-Aug-2017 17:15:00, 2.16e-01  
08-Aug-2017 17:30:00, 2.16e-01  
08-Aug-2017 17:45:00, 2.16e-01  
08-Aug-2017 18:00:00, 2.16e-01  
08-Aug-2017 18:15:00, 2.16e-01  
08-Aug-2017 18:30:00, 2.16e-01  
08-Aug-2017 18:45:00, 2.16e-01  
08-Aug-2017 19:00:00, 2.16e-01  
08-Aug-2017 19:15:00, 2.16e-01  
08-Aug-2017 19:30:00, 2.16e-01  
08-Aug-2017 19:45:00, 2.16e-01  
08-Aug-2017 20:00:00, 2.16e-01  
08-Aug-2017 20:15:00, 2.17e-01  
08-Aug-2017 20:30:00, 2.16e-01  
08-Aug-2017 20:45:00, 2.16e-01  
08-Aug-2017 21:00:00, 2.17e-01  
08-Aug-2017 21:15:00, 2.17e-01  
08-Aug-2017 21:30:00, 2.17e-01  
08-Aug-2017 21:45:00, 2.16e-01  
08-Aug-2017 22:00:00, 2.16e-01  
08-Aug-2017 22:15:00, 2.16e-01  
08-Aug-2017 22:30:00, 2.16e-01  
08-Aug-2017 22:45:00, 2.17e-01  
08-Aug-2017 23:00:00, 2.17e-01  
08-Aug-2017 23:15:00, 2.17e-01  
08-Aug-2017 23:30:00, 2.17e-01  
08-Aug-2017 23:45:00, 2.16e-01  
09-Aug-2017, 2.17e-01  
09-Aug-2017 00:15:00, 2.17e-01  
09-Aug-2017 00:30:00, 2.17e-01  
09-Aug-2017 00:45:00, 2.17e-01  
09-Aug-2017 01:00:00, 2.17e-01  
09-Aug-2017 01:15:00, 2.17e-01  
09-Aug-2017 01:30:00, 2.17e-01



09-Aug-2017 01:45:00, 2.17e-01  
09-Aug-2017 02:00:00, 2.17e-01  
09-Aug-2017 02:15:00, 2.17e-01  
09-Aug-2017 02:30:00, 2.17e-01  
09-Aug-2017 02:45:00, 2.17e-01  
09-Aug-2017 03:00:00, 2.17e-01  
09-Aug-2017 03:15:00, 2.17e-01  
09-Aug-2017 03:30:00, 2.17e-01  
09-Aug-2017 03:45:00, 2.17e-01  
09-Aug-2017 04:00:00, 2.17e-01  
09-Aug-2017 04:15:00, 2.17e-01  
09-Aug-2017 04:30:00, 2.17e-01  
09-Aug-2017 04:45:00, 2.17e-01  
09-Aug-2017 05:00:00, 2.17e-01  
09-Aug-2017 05:15:00, 2.17e-01  
09-Aug-2017 05:30:00, 2.17e-01  
09-Aug-2017 05:45:00, 2.17e-01  
09-Aug-2017 06:00:00, 2.17e-01  
09-Aug-2017 06:15:00, 2.17e-01  
09-Aug-2017 06:30:00, 2.17e-01  
09-Aug-2017 06:45:00, 2.17e-01  
09-Aug-2017 07:00:00, 2.17e-01  
09-Aug-2017 07:15:00, 2.17e-01  
09-Aug-2017 07:30:00, 2.17e-01  
09-Aug-2017 07:45:00, 2.17e-01  
09-Aug-2017 08:00:00, 2.17e-01  
09-Aug-2017 08:15:00, 2.17e-01  
09-Aug-2017 08:30:00, 2.17e-01  
09-Aug-2017 08:45:00, 2.17e-01  
09-Aug-2017 09:00:00, 2.17e-01  
09-Aug-2017 09:15:00, 2.17e-01  
09-Aug-2017 09:30:00, 2.17e-01  
09-Aug-2017 09:45:00, 2.17e-01  
09-Aug-2017 10:00:00, 2.16e-01  
09-Aug-2017 10:15:00, 2.16e-01  
09-Aug-2017 10:30:00, 2.17e-01  
09-Aug-2017 10:45:00, 2.17e-01  
09-Aug-2017 11:00:00, 2.16e-01  
09-Aug-2017 11:15:00, 2.16e-01  
09-Aug-2017 11:30:00, 2.16e-01  
09-Aug-2017 11:45:00, 2.16e-01  
09-Aug-2017 12:00:00, 2.16e-01  
09-Aug-2017 12:15:00, 2.16e-01  
09-Aug-2017 12:30:00, 2.16e-01  
09-Aug-2017 12:45:00, 2.16e-01  
09-Aug-2017 13:00:00, 2.16e-01  
09-Aug-2017 13:15:00, 2.16e-01  
09-Aug-2017 13:30:00, 2.16e-01  
09-Aug-2017 13:45:00, 2.16e-01  
09-Aug-2017 14:00:00, 2.16e-01  
09-Aug-2017 14:15:00, 2.16e-01  
09-Aug-2017 14:30:00, 2.16e-01  
09-Aug-2017 14:45:00, 2.16e-01  
09-Aug-2017 15:00:00, 2.16e-01  
09-Aug-2017 15:15:00, 2.16e-01  
09-Aug-2017 15:30:00, 2.16e-01  
09-Aug-2017 15:45:00, 2.16e-01  
09-Aug-2017 16:00:00, 2.16e-01  
09-Aug-2017 16:15:00, 2.17e-01  
09-Aug-2017 16:30:00, 2.16e-01  
09-Aug-2017 16:45:00, 2.16e-01  
09-Aug-2017 17:00:00, 2.17e-01  
09-Aug-2017 17:15:00, 2.17e-01  
09-Aug-2017 17:30:00, 2.17e-01

09-Aug-2017 17:45:00, 2.17e-01  
09-Aug-2017 18:00:00, 2.17e-01  
09-Aug-2017 18:15:00, 2.17e-01  
09-Aug-2017 18:30:00, 2.17e-01  
09-Aug-2017 18:45:00, 2.17e-01  
09-Aug-2017 19:00:00, 2.17e-01  
09-Aug-2017 19:15:00, 2.17e-01  
09-Aug-2017 19:30:00, 2.17e-01  
09-Aug-2017 19:45:00, 2.17e-01  
09-Aug-2017 20:00:00, 2.17e-01  
09-Aug-2017 20:15:00, 2.17e-01  
09-Aug-2017 20:30:00, 2.17e-01  
09-Aug-2017 20:45:00, 2.17e-01  
09-Aug-2017 21:00:00, 2.17e-01  
09-Aug-2017 21:15:00, 2.17e-01  
09-Aug-2017 21:30:00, 2.17e-01  
09-Aug-2017 21:45:00, 2.17e-01  
09-Aug-2017 22:00:00, 2.17e-01  
09-Aug-2017 22:15:00, 2.17e-01  
09-Aug-2017 22:30:00, 2.17e-01  
09-Aug-2017 22:45:00, 2.17e-01  
09-Aug-2017 23:00:00, 2.17e-01  
09-Aug-2017 23:15:00, 2.17e-01  
09-Aug-2017 23:30:00, 2.17e-01  
09-Aug-2017 23:45:00, 2.17e-01  
10-Aug-2017, 2.17e-01  
10-Aug-2017 00:15:00, 2.17e-01  
10-Aug-2017 00:30:00, 2.17e-01  
10-Aug-2017 00:45:00, 2.17e-01  
10-Aug-2017 01:00:00, 2.17e-01  
10-Aug-2017 01:15:00, 2.17e-01  
10-Aug-2017 01:30:00, 2.17e-01  
10-Aug-2017 01:45:00, 2.17e-01  
10-Aug-2017 02:00:00, 2.17e-01  
10-Aug-2017 02:15:00, 2.17e-01  
10-Aug-2017 02:30:00, 2.17e-01  
10-Aug-2017 02:45:00, 2.17e-01  
10-Aug-2017 03:00:00, 2.17e-01  
10-Aug-2017 03:15:00, 2.17e-01  
10-Aug-2017 03:30:00, 2.17e-01  
10-Aug-2017 03:45:00, 2.17e-01  
10-Aug-2017 04:00:00, 2.17e-01  
10-Aug-2017 04:15:00, 2.17e-01  
10-Aug-2017 04:30:00, 2.17e-01  
10-Aug-2017 04:45:00, 2.17e-01  
10-Aug-2017 05:00:00, 2.17e-01  
10-Aug-2017 05:15:00, 2.17e-01  
10-Aug-2017 05:30:00, 2.17e-01  
10-Aug-2017 05:45:00, 2.17e-01  
10-Aug-2017 06:00:00, 2.17e-01  
10-Aug-2017 06:15:00, 2.17e-01  
10-Aug-2017 06:30:00, 2.17e-01  
10-Aug-2017 06:45:00, 2.17e-01  
10-Aug-2017 07:00:00, 2.17e-01  
10-Aug-2017 07:15:00, 2.17e-01  
10-Aug-2017 07:30:00, 2.17e-01  
10-Aug-2017 07:45:00, 2.17e-01  
10-Aug-2017 08:00:00, 2.17e-01  
10-Aug-2017 08:15:00, 2.17e-01  
10-Aug-2017 08:30:00, 2.17e-01  
10-Aug-2017 08:45:00, 2.17e-01  
10-Aug-2017 09:00:00, 2.17e-01  
10-Aug-2017 09:15:00, 2.17e-01  
10-Aug-2017 09:30:00, 2.17e-01

|              |           |          |
|--------------|-----------|----------|
| 10-Aug-2017  | 09:45:00, | 2.17e-01 |
| 10-Aug-2017  | 10:00:00, | 2.17e-01 |
| 10-Aug-2017  | 10:15:00, | 2.17e-01 |
| 10-Aug-2017  | 10:30:00, | 2.17e-01 |
| 10-Aug-2017  | 10:45:00, | 2.17e-01 |
| 10-Aug-2017  | 11:00:00, | 2.17e-01 |
| 10-Aug-2017  | 11:15:00, | 2.17e-01 |
| 10-Aug-2017  | 11:30:00, | 2.17e-01 |
| 10-Aug-2017  | 11:45:00, | 2.17e-01 |
| 10-Aug-2017  | 12:00:00, | NaN      |
| 10-Aug-2017  | 12:15:00, | NaN      |
| 10-Aug-2017  | 12:30:00, | NaN      |
| 10-Aug-2017  | 12:45:00, | NaN      |
| 10-Aug-2017  | 13:00:00, | NaN      |
| 10-Aug-2017  | 13:15:00, | NaN      |
| 10-Aug-2017  | 13:30:00, | NaN      |
| 10-Aug-2017  | 13:45:00, | NaN      |
| 10-Aug-2017  | 14:00:00, | NaN      |
| 10-Aug-2017  | 14:15:00, | NaN      |
| 10-Aug-2017  | 14:30:00, | NaN      |
| 10-Aug-2017  | 14:45:00, | NaN      |
| 10-Aug-2017  | 15:00:00, | NaN      |
| 10-Aug-2017  | 15:15:00, | NaN      |
| 10-Aug-2017  | 15:30:00, | NaN      |
| 10-Aug-2017  | 15:45:00, | NaN      |
| 10-Aug-2017  | 16:00:00, | NaN      |
| 10-Aug-2017  | 16:15:00, | NaN      |
| 10-Aug-2017  | 16:30:00, | NaN      |
| 10-Aug-2017  | 16:45:00, | NaN      |
| 10-Aug-2017  | 17:00:00, | NaN      |
| 10-Aug-2017  | 17:15:00, | NaN      |
| 10-Aug-2017  | 17:30:00, | NaN      |
| 10-Aug-2017  | 17:45:00, | NaN      |
| 10-Aug-2017  | 18:00:00, | NaN      |
| 10-Aug-2017  | 18:15:00, | NaN      |
| 10-Aug-2017  | 18:30:00, | NaN      |
| 10-Aug-2017  | 18:45:00, | NaN      |
| 10-Aug-2017  | 19:00:00, | NaN      |
| 10-Aug-2017  | 19:15:00, | NaN      |
| 10-Aug-2017  | 19:30:00, | NaN      |
| 10-Aug-2017  | 19:45:00, | NaN      |
| 10-Aug-2017  | 20:00:00, | NaN      |
| 10-Aug-2017  | 20:15:00, | NaN      |
| 10-Aug-2017  | 20:30:00, | NaN      |
| 10-Aug-2017  | 20:45:00, | NaN      |
| 10-Aug-2017  | 21:00:00, | NaN      |
| 10-Aug-2017  | 21:15:00, | NaN      |
| 10-Aug-2017  | 21:30:00, | NaN      |
| 10-Aug-2017  | 21:45:00, | NaN      |
| 10-Aug-2017  | 22:00:00, | NaN      |
| 10-Aug-2017  | 22:15:00, | NaN      |
| 10-Aug-2017  | 22:30:00, | NaN      |
| 10-Aug-2017  | 22:45:00, | NaN      |
| 10-Aug-2017  | 23:00:00, | NaN      |
| 10-Aug-2017  | 23:15:00, | NaN      |
| 10-Aug-2017  | 23:30:00, | NaN      |
| 10-Aug-2017  | 23:45:00, | NaN      |
| 11-Aug-2017, | NaN       |          |
| 11-Aug-2017  | 00:15:00, | NaN      |
| 11-Aug-2017  | 00:30:00, | NaN      |
| 11-Aug-2017  | 00:45:00, | NaN      |
| 11-Aug-2017  | 01:00:00, | NaN      |
| 11-Aug-2017  | 01:15:00, | NaN      |
| 11-Aug-2017  | 01:30:00, | NaN      |

|             |           |     |
|-------------|-----------|-----|
| 11-Aug-2017 | 01:45:00, | NaN |
| 11-Aug-2017 | 02:00:00, | NaN |
| 11-Aug-2017 | 02:15:00, | NaN |
| 11-Aug-2017 | 02:30:00, | NaN |
| 11-Aug-2017 | 02:45:00, | NaN |
| 11-Aug-2017 | 03:00:00, | NaN |
| 11-Aug-2017 | 03:15:00, | NaN |
| 11-Aug-2017 | 03:30:00, | NaN |
| 11-Aug-2017 | 03:45:00, | NaN |
| 11-Aug-2017 | 04:00:00, | NaN |
| 11-Aug-2017 | 04:15:00, | NaN |
| 11-Aug-2017 | 04:30:00, | NaN |
| 11-Aug-2017 | 04:45:00, | NaN |
| 11-Aug-2017 | 05:00:00, | NaN |
| 11-Aug-2017 | 05:15:00, | NaN |
| 11-Aug-2017 | 05:30:00, | NaN |
| 11-Aug-2017 | 05:45:00, | NaN |
| 11-Aug-2017 | 06:00:00, | NaN |
| 11-Aug-2017 | 06:15:00, | NaN |
| 11-Aug-2017 | 06:30:00, | NaN |
| 11-Aug-2017 | 06:45:00, | NaN |
| 11-Aug-2017 | 07:00:00, | NaN |
| 11-Aug-2017 | 07:15:00, | NaN |
| 11-Aug-2017 | 07:30:00, | NaN |
| 11-Aug-2017 | 07:45:00, | NaN |
| 11-Aug-2017 | 08:00:00, | NaN |
| 11-Aug-2017 | 08:15:00, | NaN |
| 11-Aug-2017 | 08:30:00, | NaN |
| 11-Aug-2017 | 08:45:00, | NaN |
| 11-Aug-2017 | 09:00:00, | NaN |
| 11-Aug-2017 | 09:15:00, | NaN |
| 11-Aug-2017 | 09:30:00, | NaN |
| 11-Aug-2017 | 09:45:00, | NaN |
| 11-Aug-2017 | 10:00:00, | NaN |
| 11-Aug-2017 | 10:15:00, | NaN |
| 11-Aug-2017 | 10:30:00, | NaN |
| 11-Aug-2017 | 10:45:00, | NaN |
| 11-Aug-2017 | 11:00:00, | NaN |
| 11-Aug-2017 | 11:15:00, | NaN |
| 11-Aug-2017 | 11:30:00, | NaN |
| 11-Aug-2017 | 11:45:00, | NaN |
| 11-Aug-2017 | 12:00:00, | NaN |
| 11-Aug-2017 | 12:15:00, | NaN |
| 11-Aug-2017 | 12:30:00, | NaN |
| 11-Aug-2017 | 12:45:00, | NaN |
| 11-Aug-2017 | 13:00:00, | NaN |
| 11-Aug-2017 | 13:15:00, | NaN |
| 11-Aug-2017 | 13:30:00, | NaN |
| 11-Aug-2017 | 13:45:00, | NaN |
| 11-Aug-2017 | 14:00:00, | NaN |
| 11-Aug-2017 | 14:15:00, | NaN |
| 11-Aug-2017 | 14:30:00, | NaN |
| 11-Aug-2017 | 14:45:00, | NaN |
| 11-Aug-2017 | 15:00:00, | NaN |
| 11-Aug-2017 | 15:15:00, | NaN |
| 11-Aug-2017 | 15:30:00, | NaN |
| 11-Aug-2017 | 15:45:00, | NaN |
| 11-Aug-2017 | 16:00:00, | NaN |
| 11-Aug-2017 | 16:15:00, | NaN |
| 11-Aug-2017 | 16:30:00, | NaN |
| 11-Aug-2017 | 16:45:00, | NaN |
| 11-Aug-2017 | 17:00:00, | NaN |
| 11-Aug-2017 | 17:15:00, | NaN |
| 11-Aug-2017 | 17:30:00, | NaN |

|              |           |     |
|--------------|-----------|-----|
| 11-Aug-2017  | 17:45:00, | NaN |
| 11-Aug-2017  | 18:00:00, | NaN |
| 11-Aug-2017  | 18:15:00, | NaN |
| 11-Aug-2017  | 18:30:00, | NaN |
| 11-Aug-2017  | 18:45:00, | NaN |
| 11-Aug-2017  | 19:00:00, | NaN |
| 11-Aug-2017  | 19:15:00, | NaN |
| 11-Aug-2017  | 19:30:00, | NaN |
| 11-Aug-2017  | 19:45:00, | NaN |
| 11-Aug-2017  | 20:00:00, | NaN |
| 11-Aug-2017  | 20:15:00, | NaN |
| 11-Aug-2017  | 20:30:00, | NaN |
| 11-Aug-2017  | 20:45:00, | NaN |
| 11-Aug-2017  | 21:00:00, | NaN |
| 11-Aug-2017  | 21:15:00, | NaN |
| 11-Aug-2017  | 21:30:00, | NaN |
| 11-Aug-2017  | 21:45:00, | NaN |
| 11-Aug-2017  | 22:00:00, | NaN |
| 11-Aug-2017  | 22:15:00, | NaN |
| 11-Aug-2017  | 22:30:00, | NaN |
| 11-Aug-2017  | 22:45:00, | NaN |
| 11-Aug-2017  | 23:00:00, | NaN |
| 11-Aug-2017  | 23:15:00, | NaN |
| 11-Aug-2017  | 23:30:00, | NaN |
| 11-Aug-2017  | 23:45:00, | NaN |
| 12-Aug-2017, | NaN       |     |
| 12-Aug-2017  | 00:15:00, | NaN |
| 12-Aug-2017  | 00:30:00, | NaN |
| 12-Aug-2017  | 00:45:00, | NaN |
| 12-Aug-2017  | 01:00:00, | NaN |
| 12-Aug-2017  | 01:15:00, | NaN |
| 12-Aug-2017  | 01:30:00, | NaN |
| 12-Aug-2017  | 01:45:00, | NaN |
| 12-Aug-2017  | 02:00:00, | NaN |
| 12-Aug-2017  | 02:15:00, | NaN |
| 12-Aug-2017  | 02:30:00, | NaN |
| 12-Aug-2017  | 02:45:00, | NaN |
| 12-Aug-2017  | 03:00:00, | NaN |
| 12-Aug-2017  | 03:15:00, | NaN |
| 12-Aug-2017  | 03:30:00, | NaN |
| 12-Aug-2017  | 03:45:00, | NaN |
| 12-Aug-2017  | 04:00:00, | NaN |
| 12-Aug-2017  | 04:15:00, | NaN |
| 12-Aug-2017  | 04:30:00, | NaN |
| 12-Aug-2017  | 04:45:00, | NaN |
| 12-Aug-2017  | 05:00:00, | NaN |
| 12-Aug-2017  | 05:15:00, | NaN |
| 12-Aug-2017  | 05:30:00, | NaN |
| 12-Aug-2017  | 05:45:00, | NaN |
| 12-Aug-2017  | 06:00:00, | NaN |
| 12-Aug-2017  | 06:15:00, | NaN |
| 12-Aug-2017  | 06:30:00, | NaN |
| 12-Aug-2017  | 06:45:00, | NaN |
| 12-Aug-2017  | 07:00:00, | NaN |
| 12-Aug-2017  | 07:15:00, | NaN |
| 12-Aug-2017  | 07:30:00, | NaN |
| 12-Aug-2017  | 07:45:00, | NaN |
| 12-Aug-2017  | 08:00:00, | NaN |
| 12-Aug-2017  | 08:15:00, | NaN |
| 12-Aug-2017  | 08:30:00, | NaN |
| 12-Aug-2017  | 08:45:00, | NaN |
| 12-Aug-2017  | 09:00:00, | NaN |
| 12-Aug-2017  | 09:15:00, | NaN |
| 12-Aug-2017  | 09:30:00, | NaN |

|              |           |     |
|--------------|-----------|-----|
| 12-Aug-2017  | 09:45:00, | NaN |
| 12-Aug-2017  | 10:00:00, | NaN |
| 12-Aug-2017  | 10:15:00, | NaN |
| 12-Aug-2017  | 10:30:00, | NaN |
| 12-Aug-2017  | 10:45:00, | NaN |
| 12-Aug-2017  | 11:00:00, | NaN |
| 12-Aug-2017  | 11:15:00, | NaN |
| 12-Aug-2017  | 11:30:00, | NaN |
| 12-Aug-2017  | 11:45:00, | NaN |
| 12-Aug-2017  | 12:00:00, | NaN |
| 12-Aug-2017  | 12:15:00, | NaN |
| 12-Aug-2017  | 12:30:00, | NaN |
| 12-Aug-2017  | 12:45:00, | NaN |
| 12-Aug-2017  | 13:00:00, | NaN |
| 12-Aug-2017  | 13:15:00, | NaN |
| 12-Aug-2017  | 13:30:00, | NaN |
| 12-Aug-2017  | 13:45:00, | NaN |
| 12-Aug-2017  | 14:00:00, | NaN |
| 12-Aug-2017  | 14:15:00, | NaN |
| 12-Aug-2017  | 14:30:00, | NaN |
| 12-Aug-2017  | 14:45:00, | NaN |
| 12-Aug-2017  | 15:00:00, | NaN |
| 12-Aug-2017  | 15:15:00, | NaN |
| 12-Aug-2017  | 15:30:00, | NaN |
| 12-Aug-2017  | 15:45:00, | NaN |
| 12-Aug-2017  | 16:00:00, | NaN |
| 12-Aug-2017  | 16:15:00, | NaN |
| 12-Aug-2017  | 16:30:00, | NaN |
| 12-Aug-2017  | 16:45:00, | NaN |
| 12-Aug-2017  | 17:00:00, | NaN |
| 12-Aug-2017  | 17:15:00, | NaN |
| 12-Aug-2017  | 17:30:00, | NaN |
| 12-Aug-2017  | 17:45:00, | NaN |
| 12-Aug-2017  | 18:00:00, | NaN |
| 12-Aug-2017  | 18:15:00, | NaN |
| 12-Aug-2017  | 18:30:00, | NaN |
| 12-Aug-2017  | 18:45:00, | NaN |
| 12-Aug-2017  | 19:00:00, | NaN |
| 12-Aug-2017  | 19:15:00, | NaN |
| 12-Aug-2017  | 19:30:00, | NaN |
| 12-Aug-2017  | 19:45:00, | NaN |
| 12-Aug-2017  | 20:00:00, | NaN |
| 12-Aug-2017  | 20:15:00, | NaN |
| 12-Aug-2017  | 20:30:00, | NaN |
| 12-Aug-2017  | 20:45:00, | NaN |
| 12-Aug-2017  | 21:00:00, | NaN |
| 12-Aug-2017  | 21:15:00, | NaN |
| 12-Aug-2017  | 21:30:00, | NaN |
| 12-Aug-2017  | 21:45:00, | NaN |
| 12-Aug-2017  | 22:00:00, | NaN |
| 12-Aug-2017  | 22:15:00, | NaN |
| 12-Aug-2017  | 22:30:00, | NaN |
| 12-Aug-2017  | 22:45:00, | NaN |
| 12-Aug-2017  | 23:00:00, | NaN |
| 12-Aug-2017  | 23:15:00, | NaN |
| 12-Aug-2017  | 23:30:00, | NaN |
| 12-Aug-2017  | 23:45:00, | NaN |
| 13-Aug-2017, | NaN       |     |
| 13-Aug-2017  | 00:15:00, | NaN |
| 13-Aug-2017  | 00:30:00, | NaN |
| 13-Aug-2017  | 00:45:00, | NaN |
| 13-Aug-2017  | 01:00:00, | NaN |
| 13-Aug-2017  | 01:15:00, | NaN |
| 13-Aug-2017  | 01:30:00, | NaN |

|             |           |     |
|-------------|-----------|-----|
| 13-Aug-2017 | 01:45:00, | NaN |
| 13-Aug-2017 | 02:00:00, | NaN |
| 13-Aug-2017 | 02:15:00, | NaN |
| 13-Aug-2017 | 02:30:00, | NaN |
| 13-Aug-2017 | 02:45:00, | NaN |
| 13-Aug-2017 | 03:00:00, | NaN |
| 13-Aug-2017 | 03:15:00, | NaN |
| 13-Aug-2017 | 03:30:00, | NaN |
| 13-Aug-2017 | 03:45:00, | NaN |
| 13-Aug-2017 | 04:00:00, | NaN |
| 13-Aug-2017 | 04:15:00, | NaN |
| 13-Aug-2017 | 04:30:00, | NaN |
| 13-Aug-2017 | 04:45:00, | NaN |
| 13-Aug-2017 | 05:00:00, | NaN |
| 13-Aug-2017 | 05:15:00, | NaN |
| 13-Aug-2017 | 05:30:00, | NaN |
| 13-Aug-2017 | 05:45:00, | NaN |
| 13-Aug-2017 | 06:00:00, | NaN |
| 13-Aug-2017 | 06:15:00, | NaN |
| 13-Aug-2017 | 06:30:00, | NaN |
| 13-Aug-2017 | 06:45:00, | NaN |
| 13-Aug-2017 | 07:00:00, | NaN |
| 13-Aug-2017 | 07:15:00, | NaN |
| 13-Aug-2017 | 07:30:00, | NaN |
| 13-Aug-2017 | 07:45:00, | NaN |
| 13-Aug-2017 | 08:00:00, | NaN |
| 13-Aug-2017 | 08:15:00, | NaN |
| 13-Aug-2017 | 08:30:00, | NaN |
| 13-Aug-2017 | 08:45:00, | NaN |
| 13-Aug-2017 | 09:00:00, | NaN |
| 13-Aug-2017 | 09:15:00, | NaN |
| 13-Aug-2017 | 09:30:00, | NaN |
| 13-Aug-2017 | 09:45:00, | NaN |
| 13-Aug-2017 | 10:00:00, | NaN |
| 13-Aug-2017 | 10:15:00, | NaN |
| 13-Aug-2017 | 10:30:00, | NaN |
| 13-Aug-2017 | 10:45:00, | NaN |
| 13-Aug-2017 | 11:00:00, | NaN |
| 13-Aug-2017 | 11:15:00, | NaN |
| 13-Aug-2017 | 11:30:00, | NaN |
| 13-Aug-2017 | 11:45:00, | NaN |
| 13-Aug-2017 | 12:00:00, | NaN |
| 13-Aug-2017 | 12:15:00, | NaN |
| 13-Aug-2017 | 12:30:00, | NaN |
| 13-Aug-2017 | 12:45:00, | NaN |
| 13-Aug-2017 | 13:00:00, | NaN |
| 13-Aug-2017 | 13:15:00, | NaN |
| 13-Aug-2017 | 13:30:00, | NaN |
| 13-Aug-2017 | 13:45:00, | NaN |
| 13-Aug-2017 | 14:00:00, | NaN |
| 13-Aug-2017 | 14:15:00, | NaN |
| 13-Aug-2017 | 14:30:00, | NaN |
| 13-Aug-2017 | 14:45:00, | NaN |
| 13-Aug-2017 | 15:00:00, | NaN |
| 13-Aug-2017 | 15:15:00, | NaN |
| 13-Aug-2017 | 15:30:00, | NaN |
| 13-Aug-2017 | 15:45:00, | NaN |
| 13-Aug-2017 | 16:00:00, | NaN |
| 13-Aug-2017 | 16:15:00, | NaN |
| 13-Aug-2017 | 16:30:00, | NaN |
| 13-Aug-2017 | 16:45:00, | NaN |
| 13-Aug-2017 | 17:00:00, | NaN |
| 13-Aug-2017 | 17:15:00, | NaN |
| 13-Aug-2017 | 17:30:00, | NaN |

|              |           |     |
|--------------|-----------|-----|
| 13-Aug-2017  | 17:45:00, | NaN |
| 13-Aug-2017  | 18:00:00, | NaN |
| 13-Aug-2017  | 18:15:00, | NaN |
| 13-Aug-2017  | 18:30:00, | NaN |
| 13-Aug-2017  | 18:45:00, | NaN |
| 13-Aug-2017  | 19:00:00, | NaN |
| 13-Aug-2017  | 19:15:00, | NaN |
| 13-Aug-2017  | 19:30:00, | NaN |
| 13-Aug-2017  | 19:45:00, | NaN |
| 13-Aug-2017  | 20:00:00, | NaN |
| 13-Aug-2017  | 20:15:00, | NaN |
| 13-Aug-2017  | 20:30:00, | NaN |
| 13-Aug-2017  | 20:45:00, | NaN |
| 13-Aug-2017  | 21:00:00, | NaN |
| 13-Aug-2017  | 21:15:00, | NaN |
| 13-Aug-2017  | 21:30:00, | NaN |
| 13-Aug-2017  | 21:45:00, | NaN |
| 13-Aug-2017  | 22:00:00, | NaN |
| 13-Aug-2017  | 22:15:00, | NaN |
| 13-Aug-2017  | 22:30:00, | NaN |
| 13-Aug-2017  | 22:45:00, | NaN |
| 13-Aug-2017  | 23:00:00, | NaN |
| 13-Aug-2017  | 23:15:00, | NaN |
| 13-Aug-2017  | 23:30:00, | NaN |
| 13-Aug-2017  | 23:45:00, | NaN |
| 14-Aug-2017, | NaN       |     |
| 14-Aug-2017  | 00:15:00, | NaN |
| 14-Aug-2017  | 00:30:00, | NaN |
| 14-Aug-2017  | 00:45:00, | NaN |
| 14-Aug-2017  | 01:00:00, | NaN |
| 14-Aug-2017  | 01:15:00, | NaN |
| 14-Aug-2017  | 01:30:00, | NaN |
| 14-Aug-2017  | 01:45:00, | NaN |
| 14-Aug-2017  | 02:00:00, | NaN |
| 14-Aug-2017  | 02:15:00, | NaN |
| 14-Aug-2017  | 02:30:00, | NaN |
| 14-Aug-2017  | 02:45:00, | NaN |
| 14-Aug-2017  | 03:00:00, | NaN |
| 14-Aug-2017  | 03:15:00, | NaN |
| 14-Aug-2017  | 03:30:00, | NaN |
| 14-Aug-2017  | 03:45:00, | NaN |
| 14-Aug-2017  | 04:00:00, | NaN |
| 14-Aug-2017  | 04:15:00, | NaN |
| 14-Aug-2017  | 04:30:00, | NaN |
| 14-Aug-2017  | 04:45:00, | NaN |
| 14-Aug-2017  | 05:00:00, | NaN |
| 14-Aug-2017  | 05:15:00, | NaN |
| 14-Aug-2017  | 05:30:00, | NaN |
| 14-Aug-2017  | 05:45:00, | NaN |
| 14-Aug-2017  | 06:00:00, | NaN |
| 14-Aug-2017  | 06:15:00, | NaN |
| 14-Aug-2017  | 06:30:00, | NaN |
| 14-Aug-2017  | 06:45:00, | NaN |
| 14-Aug-2017  | 07:00:00, | NaN |
| 14-Aug-2017  | 07:15:00, | NaN |
| 14-Aug-2017  | 07:30:00, | NaN |
| 14-Aug-2017  | 07:45:00, | NaN |
| 14-Aug-2017  | 08:00:00, | NaN |
| 14-Aug-2017  | 08:15:00, | NaN |
| 14-Aug-2017  | 08:30:00, | NaN |
| 14-Aug-2017  | 08:45:00, | NaN |
| 14-Aug-2017  | 09:00:00, | NaN |
| 14-Aug-2017  | 09:15:00, | NaN |
| 14-Aug-2017  | 09:30:00, | NaN |



14-Aug-2017 09:45:00, NaN  
14-Aug-2017 10:00:00, NaN  
14-Aug-2017 12:15:00, 2.14e-01  
14-Aug-2017 12:30:00, 2.14e-01  
14-Aug-2017 12:45:00, 2.14e-01  
14-Aug-2017 13:00:00, 2.14e-01  
14-Aug-2017 13:15:00, 2.14e-01  
14-Aug-2017 13:30:00, 2.14e-01  
14-Aug-2017 13:45:00, 2.14e-01  
14-Aug-2017 14:00:00, 2.14e-01  
14-Aug-2017 14:15:00, 2.14e-01  
14-Aug-2017 14:30:00, 2.14e-01  
14-Aug-2017 14:45:00, 2.14e-01  
14-Aug-2017 15:00:00, 2.14e-01  
14-Aug-2017 15:15:00, 2.14e-01  
14-Aug-2017 15:30:00, 2.14e-01  
14-Aug-2017 15:45:00, 2.14e-01  
14-Aug-2017 16:00:00, 2.14e-01  
14-Aug-2017 16:15:00, 2.14e-01  
14-Aug-2017 16:30:00, 2.14e-01  
14-Aug-2017 16:45:00, 2.14e-01  
14-Aug-2017 17:00:00, 2.14e-01  
14-Aug-2017 17:15:00, 2.14e-01  
14-Aug-2017 17:30:00, 2.14e-01  
14-Aug-2017 17:45:00, 2.14e-01  
14-Aug-2017 18:00:00, 2.14e-01  
14-Aug-2017 18:15:00, 2.14e-01  
14-Aug-2017 18:30:00, 2.14e-01  
14-Aug-2017 18:45:00, 2.14e-01  
14-Aug-2017 19:00:00, 2.14e-01  
14-Aug-2017 19:15:00, 2.14e-01  
14-Aug-2017 19:30:00, 2.14e-01  
14-Aug-2017 19:45:00, 2.14e-01  
14-Aug-2017 20:00:00, 2.14e-01  
14-Aug-2017 20:15:00, 2.14e-01  
14-Aug-2017 20:30:00, 2.14e-01  
14-Aug-2017 20:45:00, 2.14e-01  
14-Aug-2017 21:00:00, 2.14e-01  
14-Aug-2017 21:15:00, 2.14e-01  
14-Aug-2017 21:30:00, 2.14e-01  
14-Aug-2017 21:45:00, 2.14e-01  
14-Aug-2017 22:00:00, 2.14e-01  
14-Aug-2017 22:15:00, 2.14e-01  
14-Aug-2017 22:30:00, 2.14e-01  
14-Aug-2017 22:45:00, 2.14e-01  
14-Aug-2017 23:00:00, 2.15e-01  
14-Aug-2017 23:15:00, 2.15e-01  
14-Aug-2017 23:30:00, 2.14e-01  
14-Aug-2017 23:45:00, 2.15e-01  
15-Aug-2017, 2.14e-01  
15-Aug-2017 00:15:00, 2.14e-01  
15-Aug-2017 00:30:00, 2.15e-01  
15-Aug-2017 00:45:00, 2.14e-01  
15-Aug-2017 01:00:00, 2.15e-01  
15-Aug-2017 01:15:00, 2.15e-01  
15-Aug-2017 01:30:00, 2.15e-01  
15-Aug-2017 01:45:00, 2.15e-01  
15-Aug-2017 02:00:00, 2.15e-01  
15-Aug-2017 02:15:00, 2.15e-01  
15-Aug-2017 02:30:00, 2.15e-01  
15-Aug-2017 02:45:00, 2.14e-01  
15-Aug-2017 03:00:00, 2.15e-01  
15-Aug-2017 03:15:00, 2.15e-01  
15-Aug-2017 03:30:00, 2.15e-01

|             |           |          |
|-------------|-----------|----------|
| 15-Aug-2017 | 03:45:00, | 2.15e-01 |
| 15-Aug-2017 | 04:00:00, | 2.14e-01 |
| 15-Aug-2017 | 04:15:00, | 2.15e-01 |
| 15-Aug-2017 | 04:30:00, | 2.15e-01 |
| 15-Aug-2017 | 04:45:00, | 2.14e-01 |
| 15-Aug-2017 | 05:00:00, | 2.15e-01 |
| 15-Aug-2017 | 05:15:00, | 2.15e-01 |
| 15-Aug-2017 | 05:30:00, | 2.15e-01 |
| 15-Aug-2017 | 05:45:00, | 2.15e-01 |
| 15-Aug-2017 | 06:00:00, | 2.14e-01 |
| 15-Aug-2017 | 06:15:00, | 2.15e-01 |
| 15-Aug-2017 | 06:30:00, | 2.14e-01 |
| 15-Aug-2017 | 06:45:00, | 2.15e-01 |
| 15-Aug-2017 | 07:00:00, | 2.14e-01 |
| 15-Aug-2017 | 07:15:00, | 2.15e-01 |
| 15-Aug-2017 | 07:30:00, | 2.14e-01 |
| 15-Aug-2017 | 07:45:00, | 2.14e-01 |
| 15-Aug-2017 | 08:00:00, | 2.14e-01 |
| 15-Aug-2017 | 08:15:00, | 2.14e-01 |
| 15-Aug-2017 | 08:30:00, | 2.14e-01 |
| 15-Aug-2017 | 08:45:00, | 2.14e-01 |
| 15-Aug-2017 | 09:00:00, | 2.14e-01 |
| 15-Aug-2017 | 09:15:00, | 2.14e-01 |
| 15-Aug-2017 | 09:30:00, | 2.14e-01 |
| 15-Aug-2017 | 09:45:00, | 2.14e-01 |
| 15-Aug-2017 | 10:00:00, | 2.14e-01 |
| 15-Aug-2017 | 10:15:00, | 2.14e-01 |
| 15-Aug-2017 | 10:30:00, | 2.14e-01 |
| 15-Aug-2017 | 10:45:00, | NaN      |
| 15-Aug-2017 | 11:00:00, | 2.14e-01 |
| 15-Aug-2017 | 11:15:00, | 2.14e-01 |
| 15-Aug-2017 | 11:30:00, | 2.14e-01 |
| 15-Aug-2017 | 11:45:00, | 2.14e-01 |
| 15-Aug-2017 | 12:00:00, | 2.14e-01 |
| 15-Aug-2017 | 12:15:00, | 2.14e-01 |
| 15-Aug-2017 | 12:30:00, | 2.14e-01 |
| 15-Aug-2017 | 12:45:00, | 2.14e-01 |
| 15-Aug-2017 | 13:00:00, | 2.14e-01 |
| 15-Aug-2017 | 13:15:00, | 2.14e-01 |
| 15-Aug-2017 | 13:30:00, | 2.14e-01 |
| 15-Aug-2017 | 13:45:00, | 2.14e-01 |
| 15-Aug-2017 | 14:00:00, | 2.14e-01 |
| 15-Aug-2017 | 14:15:00, | 2.14e-01 |
| 15-Aug-2017 | 14:30:00, | 2.14e-01 |
| 15-Aug-2017 | 14:45:00, | 2.14e-01 |
| 15-Aug-2017 | 15:00:00, | 2.14e-01 |
| 15-Aug-2017 | 15:15:00, | 2.14e-01 |
| 15-Aug-2017 | 15:30:00, | 2.14e-01 |
| 15-Aug-2017 | 15:45:00, | 2.14e-01 |
| 15-Aug-2017 | 16:00:00, | 2.14e-01 |
| 15-Aug-2017 | 16:15:00, | 2.14e-01 |
| 15-Aug-2017 | 16:30:00, | 2.14e-01 |
| 15-Aug-2017 | 16:45:00, | 2.14e-01 |
| 15-Aug-2017 | 17:00:00, | 2.14e-01 |
| 15-Aug-2017 | 17:15:00, | 2.14e-01 |
| 15-Aug-2017 | 17:30:00, | 2.14e-01 |
| 15-Aug-2017 | 17:45:00, | 2.14e-01 |
| 15-Aug-2017 | 18:00:00, | 2.14e-01 |
| 15-Aug-2017 | 18:15:00, | 2.14e-01 |
| 15-Aug-2017 | 18:30:00, | 2.14e-01 |
| 15-Aug-2017 | 18:45:00, | 2.14e-01 |
| 15-Aug-2017 | 19:00:00, | 2.14e-01 |
| 15-Aug-2017 | 19:15:00, | 2.14e-01 |
| 15-Aug-2017 | 19:30:00, | 2.14e-01 |

15-Aug-2017 19:45:00, 2.14e-01  
15-Aug-2017 20:00:00, 2.14e-01  
15-Aug-2017 20:15:00, 2.14e-01  
15-Aug-2017 20:30:00, 2.14e-01  
15-Aug-2017 20:45:00, 2.14e-01  
15-Aug-2017 21:00:00, 2.14e-01  
15-Aug-2017 21:15:00, 2.14e-01  
15-Aug-2017 21:30:00, 2.14e-01  
15-Aug-2017 21:45:00, 2.14e-01  
15-Aug-2017 22:00:00, 2.14e-01  
15-Aug-2017 22:15:00, 2.14e-01  
15-Aug-2017 22:30:00, 2.14e-01  
15-Aug-2017 22:45:00, 2.14e-01  
15-Aug-2017 23:00:00, 2.14e-01  
15-Aug-2017 23:15:00, 2.14e-01  
15-Aug-2017 23:30:00, 2.14e-01  
15-Aug-2017 23:45:00, 2.14e-01  
16-Aug-2017, 2.14e-01  
16-Aug-2017 00:15:00, 2.14e-01  
16-Aug-2017 00:30:00, 2.14e-01  
16-Aug-2017 00:45:00, 2.14e-01  
16-Aug-2017 01:00:00, 2.14e-01  
16-Aug-2017 01:15:00, 2.14e-01  
16-Aug-2017 01:30:00, 2.14e-01  
16-Aug-2017 01:45:00, 2.14e-01  
16-Aug-2017 02:00:00, 2.14e-01  
16-Aug-2017 02:15:00, 2.14e-01  
16-Aug-2017 02:30:00, 2.14e-01  
16-Aug-2017 02:45:00, 2.14e-01  
16-Aug-2017 03:00:00, 2.14e-01  
16-Aug-2017 03:15:00, 2.14e-01  
16-Aug-2017 03:30:00, 2.14e-01  
16-Aug-2017 03:45:00, 2.14e-01  
16-Aug-2017 04:00:00, 2.14e-01  
16-Aug-2017 04:15:00, 2.14e-01  
16-Aug-2017 04:30:00, 2.14e-01  
16-Aug-2017 04:45:00, 2.14e-01  
16-Aug-2017 05:00:00, 2.14e-01  
16-Aug-2017 05:15:00, 2.14e-01  
16-Aug-2017 05:30:00, 2.14e-01  
16-Aug-2017 05:45:00, 2.14e-01  
16-Aug-2017 06:00:00, 2.14e-01  
16-Aug-2017 06:15:00, 2.14e-01  
16-Aug-2017 06:30:00, 2.14e-01  
16-Aug-2017 06:45:00, 2.14e-01  
16-Aug-2017 07:00:00, 2.14e-01  
16-Aug-2017 07:15:00, 2.14e-01  
16-Aug-2017 07:30:00, 2.14e-01  
16-Aug-2017 07:45:00, 2.14e-01  
16-Aug-2017 08:00:00, 2.14e-01  
16-Aug-2017 08:15:00, 2.14e-01  
16-Aug-2017 08:30:00, 2.14e-01  
16-Aug-2017 08:45:00, 2.14e-01  
16-Aug-2017 09:00:00, 2.14e-01  
16-Aug-2017 09:15:00, 2.14e-01  
16-Aug-2017 09:30:00, 2.14e-01  
16-Aug-2017 09:45:00, 2.14e-01  
16-Aug-2017 10:00:00, 2.14e-01  
16-Aug-2017 10:15:00, 2.14e-01  
16-Aug-2017 10:30:00, 2.14e-01  
16-Aug-2017 10:45:00, 2.14e-01  
16-Aug-2017 11:00:00, 2.14e-01  
16-Aug-2017 11:15:00, 2.14e-01  
16-Aug-2017 11:30:00, 2.14e-01

16-Aug-2017 11:45:00, 2.14e-01  
16-Aug-2017 12:00:00, 2.14e-01  
16-Aug-2017 12:15:00, 2.14e-01  
16-Aug-2017 12:30:00, 2.14e-01  
16-Aug-2017 12:45:00, 2.14e-01  
16-Aug-2017 13:00:00, 2.14e-01  
16-Aug-2017 13:15:00, 2.14e-01  
16-Aug-2017 13:30:00, 2.13e-01  
16-Aug-2017 13:45:00, 2.14e-01  
16-Aug-2017 14:00:00, 2.13e-01  
16-Aug-2017 14:15:00, 2.13e-01  
16-Aug-2017 14:30:00, 2.13e-01  
16-Aug-2017 14:45:00, 2.13e-01  
16-Aug-2017 15:00:00, 2.13e-01  
16-Aug-2017 15:15:00, 2.13e-01  
16-Aug-2017 15:30:00, 2.13e-01  
16-Aug-2017 15:45:00, 2.13e-01  
16-Aug-2017 16:00:00, 2.13e-01  
16-Aug-2017 16:15:00, 2.13e-01  
16-Aug-2017 16:30:00, 2.13e-01  
16-Aug-2017 16:45:00, 2.13e-01  
16-Aug-2017 17:00:00, 2.13e-01  
16-Aug-2017 17:15:00, 2.13e-01  
16-Aug-2017 17:30:00, 2.13e-01  
16-Aug-2017 17:45:00, 2.13e-01  
16-Aug-2017 18:00:00, 2.13e-01  
16-Aug-2017 18:15:00, 2.13e-01  
16-Aug-2017 18:30:00, 2.13e-01  
16-Aug-2017 18:45:00, 2.13e-01  
16-Aug-2017 19:00:00, 2.13e-01  
16-Aug-2017 19:15:00, 2.13e-01  
16-Aug-2017 19:30:00, 2.13e-01  
16-Aug-2017 19:45:00, 2.13e-01  
16-Aug-2017 20:00:00, 2.13e-01  
16-Aug-2017 20:15:00, 2.13e-01  
16-Aug-2017 20:30:00, 2.13e-01  
16-Aug-2017 20:45:00, 2.13e-01  
16-Aug-2017 21:00:00, 2.13e-01  
16-Aug-2017 21:15:00, 2.14e-01  
16-Aug-2017 21:30:00, 2.13e-01  
16-Aug-2017 21:45:00, 2.14e-01  
16-Aug-2017 22:00:00, 2.14e-01  
16-Aug-2017 22:15:00, 2.14e-01  
16-Aug-2017 22:30:00, 2.14e-01  
16-Aug-2017 22:45:00, 2.14e-01  
16-Aug-2017 23:00:00, 2.14e-01  
16-Aug-2017 23:15:00, 2.14e-01  
16-Aug-2017 23:30:00, 2.14e-01  
16-Aug-2017 23:45:00, 2.14e-01  
17-Aug-2017, 2.14e-01  
17-Aug-2017 00:15:00, 2.14e-01  
17-Aug-2017 00:30:00, 2.14e-01  
17-Aug-2017 00:45:00, 2.14e-01  
17-Aug-2017 01:00:00, 2.14e-01  
17-Aug-2017 01:15:00, 2.14e-01  
17-Aug-2017 01:30:00, 2.14e-01  
17-Aug-2017 01:45:00, 2.14e-01  
17-Aug-2017 02:00:00, 2.14e-01  
17-Aug-2017 02:15:00, 2.14e-01  
17-Aug-2017 02:30:00, 2.14e-01  
17-Aug-2017 02:45:00, 2.14e-01  
17-Aug-2017 03:00:00, 2.14e-01  
17-Aug-2017 03:15:00, 2.14e-01  
17-Aug-2017 03:30:00, 2.14e-01

|             |           |          |
|-------------|-----------|----------|
| 17-Aug-2017 | 03:45:00, | 2.14e-01 |
| 17-Aug-2017 | 04:00:00, | 2.14e-01 |
| 17-Aug-2017 | 04:15:00, | 2.14e-01 |
| 17-Aug-2017 | 04:30:00, | 2.14e-01 |
| 17-Aug-2017 | 04:45:00, | 2.14e-01 |
| 17-Aug-2017 | 05:00:00, | 2.14e-01 |
| 17-Aug-2017 | 05:15:00, | 2.14e-01 |
| 17-Aug-2017 | 05:30:00, | 2.14e-01 |
| 17-Aug-2017 | 05:45:00, | 2.14e-01 |
| 17-Aug-2017 | 06:00:00, | 2.14e-01 |
| 17-Aug-2017 | 06:15:00, | 2.14e-01 |
| 17-Aug-2017 | 06:30:00, | 2.14e-01 |
| 17-Aug-2017 | 06:45:00, | 2.14e-01 |
| 17-Aug-2017 | 07:00:00, | 2.14e-01 |
| 17-Aug-2017 | 07:15:00, | 2.14e-01 |
| 17-Aug-2017 | 07:30:00, | 2.14e-01 |
| 17-Aug-2017 | 07:45:00, | 2.14e-01 |
| 17-Aug-2017 | 08:00:00, | NaN      |
| 17-Aug-2017 | 08:15:00, | NaN      |
| 17-Aug-2017 | 08:30:00, | NaN      |
| 17-Aug-2017 | 08:45:00, | NaN      |
| 17-Aug-2017 | 09:00:00, | NaN      |
| 17-Aug-2017 | 09:15:00, | NaN      |
| 17-Aug-2017 | 09:30:00, | 2.14e-01 |
| 17-Aug-2017 | 09:45:00, | 2.13e-01 |
| 17-Aug-2017 | 10:00:00, | 2.13e-01 |
| 17-Aug-2017 | 10:15:00, | 2.13e-01 |
| 17-Aug-2017 | 10:30:00, | 2.13e-01 |
| 17-Aug-2017 | 10:45:00, | 2.13e-01 |
| 17-Aug-2017 | 11:00:00, | 2.13e-01 |
| 17-Aug-2017 | 11:15:00, | 2.13e-01 |
| 17-Aug-2017 | 11:30:00, | 2.13e-01 |
| 17-Aug-2017 | 11:45:00, | 2.13e-01 |
| 17-Aug-2017 | 12:00:00, | 2.13e-01 |
| 17-Aug-2017 | 12:15:00, | 2.13e-01 |
| 17-Aug-2017 | 12:30:00, | 2.13e-01 |
| 17-Aug-2017 | 12:45:00, | 2.13e-01 |
| 17-Aug-2017 | 13:00:00, | 2.13e-01 |
| 17-Aug-2017 | 13:15:00, | 2.13e-01 |
| 17-Aug-2017 | 13:30:00, | 2.13e-01 |
| 17-Aug-2017 | 13:45:00, | 2.13e-01 |
| 17-Aug-2017 | 14:00:00, | 2.13e-01 |
| 17-Aug-2017 | 14:15:00, | 2.13e-01 |
| 17-Aug-2017 | 14:30:00, | 2.13e-01 |
| 17-Aug-2017 | 14:45:00, | 2.13e-01 |
| 17-Aug-2017 | 15:00:00, | 2.13e-01 |
| 17-Aug-2017 | 15:15:00, | 2.13e-01 |
| 17-Aug-2017 | 15:30:00, | 2.13e-01 |
| 17-Aug-2017 | 15:45:00, | 2.13e-01 |
| 17-Aug-2017 | 16:00:00, | 2.13e-01 |
| 17-Aug-2017 | 16:15:00, | 2.13e-01 |
| 17-Aug-2017 | 16:30:00, | 2.13e-01 |
| 17-Aug-2017 | 16:45:00, | 2.13e-01 |
| 17-Aug-2017 | 17:00:00, | 2.13e-01 |
| 17-Aug-2017 | 17:15:00, | 2.13e-01 |
| 17-Aug-2017 | 17:30:00, | 2.13e-01 |
| 17-Aug-2017 | 17:45:00, | 2.13e-01 |
| 17-Aug-2017 | 18:00:00, | 2.13e-01 |
| 17-Aug-2017 | 18:15:00, | 2.13e-01 |
| 17-Aug-2017 | 18:30:00, | 2.13e-01 |
| 17-Aug-2017 | 18:45:00, | 2.13e-01 |
| 17-Aug-2017 | 19:00:00, | 2.13e-01 |
| 17-Aug-2017 | 19:15:00, | 2.13e-01 |
| 17-Aug-2017 | 19:30:00, | 2.13e-01 |

17-Aug-2017 19:45:00, 2.13e-01  
17-Aug-2017 20:00:00, 2.13e-01  
17-Aug-2017 20:15:00, 2.13e-01  
17-Aug-2017 20:30:00, 2.13e-01  
17-Aug-2017 20:45:00, 2.13e-01  
17-Aug-2017 21:00:00, 2.13e-01  
17-Aug-2017 21:15:00, 2.13e-01  
17-Aug-2017 21:30:00, 2.13e-01  
17-Aug-2017 21:45:00, 2.13e-01  
17-Aug-2017 22:00:00, 2.13e-01  
17-Aug-2017 22:15:00, 2.13e-01  
17-Aug-2017 22:30:00, 2.13e-01  
17-Aug-2017 22:45:00, 2.13e-01  
17-Aug-2017 23:00:00, 2.13e-01  
17-Aug-2017 23:15:00, 2.13e-01  
17-Aug-2017 23:30:00, 2.13e-01  
17-Aug-2017 23:45:00, 2.13e-01  
18-Aug-2017, 2.13e-01  
18-Aug-2017 00:15:00, 2.13e-01  
18-Aug-2017 00:30:00, 2.13e-01  
18-Aug-2017 00:45:00, 2.13e-01  
18-Aug-2017 01:00:00, 2.13e-01  
18-Aug-2017 01:15:00, 2.13e-01  
18-Aug-2017 01:30:00, 2.13e-01  
18-Aug-2017 01:45:00, 2.13e-01  
18-Aug-2017 02:00:00, 2.13e-01  
18-Aug-2017 02:15:00, 2.13e-01  
18-Aug-2017 02:30:00, 2.13e-01  
18-Aug-2017 02:45:00, 2.13e-01  
18-Aug-2017 03:00:00, 2.13e-01  
18-Aug-2017 03:15:00, 2.13e-01  
18-Aug-2017 03:30:00, 2.13e-01  
18-Aug-2017 03:45:00, 2.13e-01  
18-Aug-2017 04:00:00, 2.13e-01  
18-Aug-2017 04:15:00, 2.13e-01  
18-Aug-2017 04:30:00, 2.13e-01  
18-Aug-2017 04:45:00, 2.13e-01  
18-Aug-2017 05:00:00, 2.13e-01  
18-Aug-2017 05:15:00, 2.13e-01  
18-Aug-2017 05:30:00, 2.13e-01  
18-Aug-2017 05:45:00, 2.13e-01  
18-Aug-2017 06:00:00, 2.13e-01  
18-Aug-2017 06:15:00, 2.13e-01  
18-Aug-2017 06:30:00, 2.13e-01  
18-Aug-2017 06:45:00, 2.13e-01  
18-Aug-2017 07:00:00, 2.13e-01  
18-Aug-2017 07:15:00, 2.13e-01  
18-Aug-2017 07:30:00, 2.13e-01  
18-Aug-2017 07:45:00, 2.13e-01  
18-Aug-2017 08:00:00, 2.13e-01  
18-Aug-2017 08:15:00, 2.13e-01  
18-Aug-2017 08:30:00, 2.13e-01  
18-Aug-2017 08:45:00, 2.13e-01  
18-Aug-2017 09:00:00, 2.13e-01  
18-Aug-2017 09:15:00, 2.13e-01  
18-Aug-2017 09:30:00, 2.13e-01  
18-Aug-2017 09:45:00, 2.13e-01  
18-Aug-2017 10:00:00, 2.13e-01  
18-Aug-2017 10:15:00, 2.13e-01  
18-Aug-2017 10:30:00, 2.13e-01  
18-Aug-2017 10:45:00, 2.13e-01  
18-Aug-2017 11:00:00, 2.13e-01  
18-Aug-2017 11:15:00, 2.13e-01  
18-Aug-2017 11:30:00, 2.13e-01

18-Aug-2017 11:45:00, 2.12e-01  
18-Aug-2017 12:00:00, 2.12e-01  
18-Aug-2017 12:15:00, 2.12e-01  
18-Aug-2017 12:30:00, 2.12e-01  
18-Aug-2017 12:45:00, 2.12e-01  
18-Aug-2017 13:00:00, 2.12e-01  
18-Aug-2017 13:15:00, 2.12e-01  
18-Aug-2017 13:30:00, 2.12e-01  
18-Aug-2017 13:45:00, 2.12e-01  
18-Aug-2017 14:00:00, 2.11e-01  
18-Aug-2017 14:15:00, 2.12e-01  
18-Aug-2017 14:30:00, 2.11e-01  
18-Aug-2017 14:45:00, 2.11e-01  
18-Aug-2017 15:00:00, 2.11e-01  
18-Aug-2017 15:15:00, 2.11e-01  
18-Aug-2017 15:30:00, 2.11e-01  
18-Aug-2017 15:45:00, 2.11e-01  
18-Aug-2017 16:00:00, 2.11e-01  
18-Aug-2017 16:15:00, 2.11e-01  
18-Aug-2017 16:30:00, 2.11e-01  
18-Aug-2017 16:45:00, 2.11e-01  
18-Aug-2017 17:00:00, 2.11e-01  
18-Aug-2017 17:15:00, 2.11e-01  
18-Aug-2017 17:30:00, 2.11e-01  
18-Aug-2017 17:45:00, 2.11e-01  
18-Aug-2017 18:00:00, 2.11e-01  
18-Aug-2017 18:15:00, 2.11e-01  
18-Aug-2017 18:30:00, 2.11e-01  
18-Aug-2017 18:45:00, 2.11e-01  
18-Aug-2017 19:00:00, 2.11e-01  
18-Aug-2017 19:15:00, 2.11e-01  
18-Aug-2017 19:30:00, 2.11e-01  
18-Aug-2017 19:45:00, 2.11e-01  
18-Aug-2017 20:00:00, 2.11e-01  
18-Aug-2017 20:15:00, 2.12e-01  
18-Aug-2017 20:30:00, 2.11e-01  
18-Aug-2017 20:45:00, 2.11e-01  
18-Aug-2017 21:00:00, 2.12e-01  
18-Aug-2017 21:15:00, 2.12e-01  
18-Aug-2017 21:30:00, 2.12e-01  
18-Aug-2017 21:45:00, 2.12e-01  
18-Aug-2017 22:00:00, 2.12e-01  
18-Aug-2017 22:15:00, 2.12e-01  
18-Aug-2017 22:30:00, 2.12e-01  
18-Aug-2017 22:45:00, 2.12e-01  
18-Aug-2017 23:00:00, 2.12e-01  
18-Aug-2017 23:15:00, 2.12e-01  
18-Aug-2017 23:30:00, 2.12e-01  
18-Aug-2017 23:45:00, 2.12e-01  
19-Aug-2017, 2.12e-01  
19-Aug-2017 00:15:00, 2.12e-01  
19-Aug-2017 00:30:00, 2.12e-01  
19-Aug-2017 00:45:00, 2.12e-01  
19-Aug-2017 01:00:00, 2.12e-01  
19-Aug-2017 01:15:00, 2.12e-01  
19-Aug-2017 01:30:00, 2.12e-01  
19-Aug-2017 01:45:00, 2.12e-01  
19-Aug-2017 02:00:00, 2.12e-01  
19-Aug-2017 02:15:00, 2.12e-01  
19-Aug-2017 02:30:00, 2.12e-01  
19-Aug-2017 02:45:00, 2.12e-01  
19-Aug-2017 03:00:00, 2.12e-01  
19-Aug-2017 03:15:00, 2.12e-01  
19-Aug-2017 03:30:00, 2.12e-01

19-Aug-2017 03:45:00, 2.12e-01  
19-Aug-2017 04:00:00, 2.13e-01  
19-Aug-2017 04:15:00, 2.12e-01  
19-Aug-2017 04:30:00, 2.12e-01  
19-Aug-2017 04:45:00, 2.12e-01  
19-Aug-2017 05:00:00, 2.12e-01  
19-Aug-2017 05:15:00, 2.12e-01  
19-Aug-2017 05:30:00, 2.13e-01  
19-Aug-2017 05:45:00, 2.12e-01  
19-Aug-2017 06:00:00, 2.12e-01  
19-Aug-2017 06:15:00, 2.12e-01  
19-Aug-2017 06:30:00, 2.12e-01  
19-Aug-2017 06:45:00, 2.12e-01  
19-Aug-2017 07:00:00, 2.12e-01  
19-Aug-2017 07:15:00, 2.12e-01  
19-Aug-2017 07:30:00, 2.12e-01  
19-Aug-2017 07:45:00, 2.12e-01  
19-Aug-2017 08:00:00, 2.12e-01  
19-Aug-2017 08:15:00, 2.12e-01  
19-Aug-2017 08:30:00, 2.12e-01  
19-Aug-2017 08:45:00, 2.12e-01  
19-Aug-2017 09:00:00, 2.12e-01  
19-Aug-2017 09:15:00, 2.12e-01  
19-Aug-2017 09:30:00, 2.12e-01  
19-Aug-2017 09:45:00, 2.12e-01  
19-Aug-2017 10:00:00, 2.12e-01  
19-Aug-2017 10:15:00, 2.12e-01  
19-Aug-2017 10:30:00, 2.11e-01  
19-Aug-2017 10:45:00, 2.12e-01  
19-Aug-2017 11:00:00, 2.11e-01  
19-Aug-2017 11:15:00, 2.12e-01  
19-Aug-2017 11:30:00, 2.11e-01  
19-Aug-2017 11:45:00, 2.11e-01  
19-Aug-2017 12:00:00, 2.11e-01  
19-Aug-2017 12:15:00, 2.11e-01  
19-Aug-2017 12:30:00, 2.11e-01  
19-Aug-2017 12:45:00, 2.11e-01  
19-Aug-2017 13:00:00, 2.11e-01  
19-Aug-2017 13:15:00, 2.11e-01  
19-Aug-2017 13:30:00, 2.11e-01  
19-Aug-2017 13:45:00, 2.11e-01  
19-Aug-2017 14:00:00, 2.11e-01  
19-Aug-2017 14:15:00, 2.11e-01  
19-Aug-2017 14:30:00, 2.11e-01  
19-Aug-2017 14:45:00, 2.11e-01  
19-Aug-2017 15:00:00, 2.11e-01  
19-Aug-2017 15:15:00, 2.11e-01  
19-Aug-2017 15:30:00, 2.11e-01  
19-Aug-2017 15:45:00, 2.11e-01  
19-Aug-2017 16:00:00, 2.11e-01  
19-Aug-2017 16:15:00, 2.11e-01  
19-Aug-2017 16:30:00, 2.11e-01  
19-Aug-2017 16:45:00, 2.11e-01  
19-Aug-2017 17:00:00, 2.11e-01  
19-Aug-2017 17:15:00, 2.10e-01  
19-Aug-2017 17:30:00, 2.10e-01  
19-Aug-2017 17:45:00, 2.11e-01  
19-Aug-2017 18:00:00, 2.11e-01  
19-Aug-2017 18:15:00, 2.11e-01  
19-Aug-2017 18:30:00, 2.11e-01  
19-Aug-2017 18:45:00, 2.11e-01  
19-Aug-2017 19:00:00, 2.11e-01  
19-Aug-2017 19:15:00, 2.11e-01  
19-Aug-2017 19:30:00, 2.11e-01



19-Aug-2017 19:45:00, 2.11e-01  
19-Aug-2017 20:00:00, 2.11e-01  
19-Aug-2017 20:15:00, 2.11e-01  
19-Aug-2017 20:30:00, 2.11e-01  
19-Aug-2017 20:45:00, 2.11e-01  
19-Aug-2017 21:00:00, 2.11e-01  
19-Aug-2017 21:15:00, 2.11e-01  
19-Aug-2017 21:30:00, 2.11e-01  
19-Aug-2017 21:45:00, 2.11e-01  
19-Aug-2017 22:00:00, 2.11e-01  
19-Aug-2017 22:15:00, 2.11e-01  
19-Aug-2017 22:30:00, 2.11e-01  
19-Aug-2017 22:45:00, 2.11e-01  
19-Aug-2017 23:00:00, 2.11e-01  
19-Aug-2017 23:15:00, 2.11e-01  
19-Aug-2017 23:30:00, 2.11e-01  
19-Aug-2017 23:45:00, 2.11e-01  
20-Aug-2017, 2.11e-01  
20-Aug-2017 00:15:00, 2.11e-01  
20-Aug-2017 00:30:00, 2.11e-01  
20-Aug-2017 00:45:00, 2.11e-01  
20-Aug-2017 01:00:00, 2.11e-01  
20-Aug-2017 01:15:00, 2.11e-01  
20-Aug-2017 01:30:00, 2.11e-01  
20-Aug-2017 01:45:00, 2.11e-01  
20-Aug-2017 02:00:00, 2.11e-01  
20-Aug-2017 02:15:00, 2.11e-01  
20-Aug-2017 02:30:00, 2.11e-01  
20-Aug-2017 02:45:00, 2.11e-01  
20-Aug-2017 03:00:00, 2.11e-01  
20-Aug-2017 03:15:00, 2.11e-01  
20-Aug-2017 03:30:00, 2.11e-01  
20-Aug-2017 03:45:00, 2.11e-01  
20-Aug-2017 04:00:00, 2.11e-01  
20-Aug-2017 04:15:00, 2.11e-01  
20-Aug-2017 04:30:00, 2.11e-01  
20-Aug-2017 04:45:00, 2.11e-01  
20-Aug-2017 05:00:00, 2.11e-01  
20-Aug-2017 05:15:00, 2.11e-01  
20-Aug-2017 05:30:00, 2.11e-01  
20-Aug-2017 05:45:00, 2.11e-01  
20-Aug-2017 06:00:00, 2.11e-01  
20-Aug-2017 06:15:00, 2.11e-01  
20-Aug-2017 06:30:00, 2.11e-01  
20-Aug-2017 06:45:00, 2.11e-01  
20-Aug-2017 07:00:00, 2.11e-01  
20-Aug-2017 07:15:00, 2.11e-01  
20-Aug-2017 07:30:00, 2.11e-01  
20-Aug-2017 07:45:00, 2.11e-01  
20-Aug-2017 08:00:00, 2.11e-01  
20-Aug-2017 08:15:00, 2.11e-01  
20-Aug-2017 08:30:00, 2.11e-01  
20-Aug-2017 08:45:00, 2.11e-01  
20-Aug-2017 09:00:00, 2.11e-01  
20-Aug-2017 09:15:00, 2.11e-01  
20-Aug-2017 09:30:00, 2.11e-01  
20-Aug-2017 09:45:00, 2.11e-01  
20-Aug-2017 10:00:00, 2.11e-01  
20-Aug-2017 10:15:00, 2.11e-01  
20-Aug-2017 10:30:00, 2.11e-01  
20-Aug-2017 10:45:00, 2.11e-01  
20-Aug-2017 11:00:00, 2.11e-01  
20-Aug-2017 11:15:00, 2.10e-01  
20-Aug-2017 11:30:00, 2.10e-01

20-Aug-2017 11:45:00, 2.10e-01  
20-Aug-2017 12:00:00, 2.10e-01  
20-Aug-2017 12:15:00, 2.10e-01  
20-Aug-2017 12:30:00, 2.10e-01  
20-Aug-2017 12:45:00, 2.10e-01  
20-Aug-2017 13:00:00, 2.10e-01  
20-Aug-2017 13:15:00, 2.10e-01  
20-Aug-2017 13:30:00, 2.10e-01  
20-Aug-2017 13:45:00, 2.10e-01  
20-Aug-2017 14:00:00, 2.10e-01  
20-Aug-2017 14:15:00, 2.10e-01  
20-Aug-2017 14:30:00, 2.10e-01  
20-Aug-2017 14:45:00, 2.10e-01  
20-Aug-2017 15:00:00, 2.10e-01  
20-Aug-2017 15:15:00, 2.10e-01  
20-Aug-2017 15:30:00, 2.10e-01  
20-Aug-2017 15:45:00, 2.10e-01  
20-Aug-2017 16:00:00, 2.09e-01  
20-Aug-2017 16:15:00, 2.09e-01  
20-Aug-2017 16:30:00, 2.10e-01  
20-Aug-2017 16:45:00, 2.09e-01  
20-Aug-2017 17:00:00, 2.10e-01  
20-Aug-2017 17:15:00, 2.09e-01  
20-Aug-2017 17:30:00, 2.09e-01  
20-Aug-2017 17:45:00, 2.09e-01  
20-Aug-2017 18:00:00, 2.10e-01  
20-Aug-2017 18:15:00, 2.10e-01  
20-Aug-2017 18:30:00, 2.09e-01  
20-Aug-2017 18:45:00, 2.10e-01  
20-Aug-2017 19:00:00, 2.10e-01  
20-Aug-2017 19:15:00, 2.09e-01  
20-Aug-2017 19:30:00, 2.10e-01  
20-Aug-2017 19:45:00, 2.09e-01  
20-Aug-2017 20:00:00, 2.10e-01  
20-Aug-2017 20:15:00, 2.10e-01  
20-Aug-2017 20:30:00, 2.10e-01  
20-Aug-2017 20:45:00, 2.10e-01  
20-Aug-2017 21:00:00, 2.10e-01  
20-Aug-2017 21:15:00, 2.10e-01  
20-Aug-2017 21:30:00, 2.10e-01  
20-Aug-2017 21:45:00, 2.10e-01  
20-Aug-2017 22:00:00, 2.10e-01  
20-Aug-2017 22:15:00, 2.10e-01  
20-Aug-2017 22:30:00, 2.10e-01  
20-Aug-2017 22:45:00, 2.10e-01  
20-Aug-2017 23:00:00, 2.10e-01  
20-Aug-2017 23:15:00, 2.10e-01  
20-Aug-2017 23:30:00, 2.10e-01  
20-Aug-2017 23:45:00, 2.10e-01  
21-Aug-2017, 2.10e-01  
21-Aug-2017 00:15:00, 2.10e-01  
21-Aug-2017 00:30:00, 2.10e-01  
21-Aug-2017 00:45:00, 2.10e-01  
21-Aug-2017 01:00:00, 2.10e-01  
21-Aug-2017 01:15:00, 2.10e-01  
21-Aug-2017 01:30:00, 2.10e-01  
21-Aug-2017 01:45:00, 2.10e-01  
21-Aug-2017 02:00:00, 2.10e-01  
21-Aug-2017 02:15:00, 2.10e-01  
21-Aug-2017 02:30:00, 2.10e-01  
21-Aug-2017 02:45:00, 2.10e-01  
21-Aug-2017 03:00:00, 2.10e-01  
21-Aug-2017 03:15:00, 2.10e-01  
21-Aug-2017 03:30:00, 2.10e-01

21-Aug-2017 03:45:00, 2.10e-01  
21-Aug-2017 04:00:00, 2.10e-01  
21-Aug-2017 04:15:00, 2.10e-01  
21-Aug-2017 04:30:00, 2.10e-01  
21-Aug-2017 04:45:00, 2.10e-01  
21-Aug-2017 05:00:00, 2.10e-01  
21-Aug-2017 05:15:00, 2.10e-01  
21-Aug-2017 05:30:00, 2.10e-01  
21-Aug-2017 05:45:00, 2.10e-01  
21-Aug-2017 06:00:00, 2.10e-01  
21-Aug-2017 06:15:00, 2.10e-01  
21-Aug-2017 06:30:00, 2.10e-01  
21-Aug-2017 06:45:00, 2.10e-01  
21-Aug-2017 07:00:00, 2.10e-01  
21-Aug-2017 07:15:00, 2.10e-01  
21-Aug-2017 07:30:00, 2.10e-01  
21-Aug-2017 07:45:00, 2.10e-01  
21-Aug-2017 08:00:00, 2.10e-01  
21-Aug-2017 08:15:00, 2.10e-01  
21-Aug-2017 08:30:00, 2.10e-01  
21-Aug-2017 08:45:00, 2.10e-01  
21-Aug-2017 09:00:00, 2.10e-01  
21-Aug-2017 09:15:00, 2.10e-01  
21-Aug-2017 09:30:00, 2.10e-01  
21-Aug-2017 09:45:00, 2.10e-01  
21-Aug-2017 10:00:00, 2.10e-01  
21-Aug-2017 10:15:00, 2.10e-01  
21-Aug-2017 10:30:00, 2.10e-01  
21-Aug-2017 10:45:00, 2.10e-01  
21-Aug-2017 11:00:00, 2.10e-01  
21-Aug-2017 11:15:00, 2.10e-01  
21-Aug-2017 11:30:00, 2.10e-01  
21-Aug-2017 11:45:00, 2.09e-01  
21-Aug-2017 12:00:00, 2.09e-01  
21-Aug-2017 12:15:00, 2.09e-01  
21-Aug-2017 12:30:00, 2.09e-01  
21-Aug-2017 12:45:00, 2.09e-01  
21-Aug-2017 13:00:00, 2.09e-01  
21-Aug-2017 13:15:00, 2.09e-01  
21-Aug-2017 13:30:00, 2.09e-01  
21-Aug-2017 13:45:00, 2.09e-01  
21-Aug-2017 14:00:00, 2.08e-01  
21-Aug-2017 14:15:00, 2.09e-01  
21-Aug-2017 14:30:00, 2.08e-01  
21-Aug-2017 14:45:00, 2.08e-01  
21-Aug-2017 15:00:00, 2.08e-01  
21-Aug-2017 15:15:00, 2.08e-01  
21-Aug-2017 15:30:00, 2.08e-01  
21-Aug-2017 15:45:00, 2.08e-01  
21-Aug-2017 16:00:00, 2.08e-01  
21-Aug-2017 16:15:00, 2.08e-01  
21-Aug-2017 16:30:00, 2.08e-01  
21-Aug-2017 16:45:00, 2.08e-01  
21-Aug-2017 17:00:00, 2.08e-01  
21-Aug-2017 17:15:00, 2.08e-01  
21-Aug-2017 17:30:00, 2.08e-01  
21-Aug-2017 17:45:00, 2.08e-01  
21-Aug-2017 18:00:00, 2.08e-01  
21-Aug-2017 18:15:00, 2.08e-01  
21-Aug-2017 18:30:00, 2.08e-01  
21-Aug-2017 18:45:00, 2.08e-01  
21-Aug-2017 19:00:00, 2.08e-01  
21-Aug-2017 19:15:00, 2.08e-01  
21-Aug-2017 19:30:00, 2.08e-01

21-Aug-2017 19:45:00, 2.08e-01  
21-Aug-2017 20:00:00, 2.08e-01  
21-Aug-2017 20:15:00, 2.08e-01  
21-Aug-2017 20:30:00, 2.08e-01  
21-Aug-2017 20:45:00, 2.08e-01  
21-Aug-2017 21:00:00, 2.08e-01  
21-Aug-2017 21:15:00, 2.08e-01  
21-Aug-2017 21:30:00, 2.08e-01  
21-Aug-2017 21:45:00, 2.08e-01  
21-Aug-2017 22:00:00, 2.08e-01  
21-Aug-2017 22:15:00, 2.08e-01  
21-Aug-2017 22:30:00, 2.08e-01  
21-Aug-2017 22:45:00, 2.08e-01  
21-Aug-2017 23:00:00, 2.08e-01  
21-Aug-2017 23:15:00, 2.08e-01  
21-Aug-2017 23:30:00, 2.08e-01  
21-Aug-2017 23:45:00, 2.08e-01  
22-Aug-2017, 2.08e-01  
22-Aug-2017 00:15:00, 2.09e-01  
22-Aug-2017 00:30:00, 2.08e-01  
22-Aug-2017 00:45:00, 2.09e-01  
22-Aug-2017 01:00:00, 2.08e-01  
22-Aug-2017 01:15:00, 2.09e-01  
22-Aug-2017 01:30:00, 2.09e-01  
22-Aug-2017 01:45:00, 2.09e-01  
22-Aug-2017 02:00:00, 2.09e-01  
22-Aug-2017 02:15:00, 2.09e-01  
22-Aug-2017 02:30:00, 2.08e-01  
22-Aug-2017 02:45:00, 2.09e-01  
22-Aug-2017 03:00:00, 2.08e-01  
22-Aug-2017 03:15:00, 2.09e-01  
22-Aug-2017 03:30:00, 2.08e-01  
22-Aug-2017 03:45:00, 2.09e-01  
22-Aug-2017 04:00:00, 2.09e-01  
22-Aug-2017 04:15:00, 2.08e-01  
22-Aug-2017 04:30:00, 2.09e-01  
22-Aug-2017 04:45:00, 2.08e-01  
22-Aug-2017 05:00:00, 2.09e-01  
22-Aug-2017 05:15:00, 2.09e-01  
22-Aug-2017 05:30:00, 2.08e-01  
22-Aug-2017 05:45:00, 2.08e-01  
22-Aug-2017 06:00:00, 2.09e-01  
22-Aug-2017 06:15:00, 2.08e-01  
22-Aug-2017 06:30:00, 2.08e-01  
22-Aug-2017 06:45:00, 2.08e-01  
22-Aug-2017 07:00:00, 2.08e-01  
22-Aug-2017 07:15:00, 2.08e-01  
22-Aug-2017 07:30:00, 2.08e-01  
22-Aug-2017 07:45:00, 2.08e-01  
22-Aug-2017 08:00:00, 2.08e-01  
22-Aug-2017 08:15:00, 2.08e-01  
22-Aug-2017 08:30:00, 2.08e-01  
22-Aug-2017 08:45:00, 2.08e-01  
22-Aug-2017 09:00:00, 2.08e-01  
22-Aug-2017 09:15:00, 2.08e-01  
22-Aug-2017 09:30:00, 2.08e-01  
22-Aug-2017 09:45:00, 2.08e-01  
22-Aug-2017 10:00:00, 2.08e-01  
22-Aug-2017 10:15:00, 2.08e-01  
22-Aug-2017 10:30:00, 2.08e-01  
22-Aug-2017 10:45:00, 2.08e-01  
22-Aug-2017 11:00:00, 2.08e-01  
22-Aug-2017 11:15:00, 2.08e-01  
22-Aug-2017 11:30:00, 2.08e-01

22-Aug-2017 11:45:00, 2.08e-01  
22-Aug-2017 12:00:00, 2.08e-01  
22-Aug-2017 12:15:00, 2.08e-01  
22-Aug-2017 12:30:00, 2.08e-01  
22-Aug-2017 12:45:00, 2.08e-01  
22-Aug-2017 13:00:00, 2.08e-01  
22-Aug-2017 13:15:00, 2.08e-01  
22-Aug-2017 13:30:00, 2.08e-01  
22-Aug-2017 13:45:00, 2.07e-01  
22-Aug-2017 14:00:00, 2.07e-01  
22-Aug-2017 14:15:00, 2.07e-01  
22-Aug-2017 14:30:00, 2.07e-01  
22-Aug-2017 14:45:00, 2.07e-01  
22-Aug-2017 15:00:00, 2.07e-01  
22-Aug-2017 15:15:00, 2.07e-01  
22-Aug-2017 15:30:00, 2.07e-01  
22-Aug-2017 15:45:00, 2.07e-01  
22-Aug-2017 16:00:00, 2.07e-01  
22-Aug-2017 16:15:00, 2.07e-01  
22-Aug-2017 16:30:00, 2.07e-01  
22-Aug-2017 16:45:00, 2.07e-01  
22-Aug-2017 17:00:00, 2.07e-01  
22-Aug-2017 17:15:00, 2.07e-01  
22-Aug-2017 17:30:00, 2.07e-01  
22-Aug-2017 17:45:00, 2.07e-01  
22-Aug-2017 18:00:00, 2.07e-01  
22-Aug-2017 18:15:00, 2.07e-01  
22-Aug-2017 18:30:00, 2.07e-01  
22-Aug-2017 18:45:00, 2.07e-01  
22-Aug-2017 19:00:00, 2.07e-01  
22-Aug-2017 19:15:00, 2.07e-01  
22-Aug-2017 19:30:00, 2.07e-01  
22-Aug-2017 19:45:00, 2.07e-01  
22-Aug-2017 20:00:00, 2.07e-01  
22-Aug-2017 20:15:00, 2.07e-01  
22-Aug-2017 20:30:00, 2.07e-01  
22-Aug-2017 20:45:00, 2.07e-01  
22-Aug-2017 21:00:00, 2.07e-01  
22-Aug-2017 21:15:00, 2.07e-01  
22-Aug-2017 21:30:00, 2.07e-01  
22-Aug-2017 21:45:00, 2.07e-01  
22-Aug-2017 22:00:00, 2.07e-01  
22-Aug-2017 22:15:00, 2.08e-01  
22-Aug-2017 22:30:00, 2.07e-01  
22-Aug-2017 22:45:00, 2.08e-01  
22-Aug-2017 23:00:00, 2.07e-01  
22-Aug-2017 23:15:00, 2.07e-01  
22-Aug-2017 23:30:00, 2.07e-01  
22-Aug-2017 23:45:00, 2.08e-01  
23-Aug-2017, 2.08e-01  
23-Aug-2017 00:15:00, 2.08e-01  
23-Aug-2017 00:30:00, 2.08e-01  
23-Aug-2017 00:45:00, 2.08e-01  
23-Aug-2017 01:00:00, 2.08e-01  
23-Aug-2017 01:15:00, 2.08e-01  
23-Aug-2017 01:30:00, 2.08e-01  
23-Aug-2017 01:45:00, 2.08e-01  
23-Aug-2017 02:00:00, 2.08e-01  
23-Aug-2017 02:15:00, 2.08e-01  
23-Aug-2017 02:30:00, 2.08e-01  
23-Aug-2017 02:45:00, 2.08e-01  
23-Aug-2017 03:00:00, 2.08e-01  
23-Aug-2017 03:15:00, 2.08e-01  
23-Aug-2017 03:30:00, 2.08e-01

|             |           |          |
|-------------|-----------|----------|
| 23-Aug-2017 | 03:45:00, | 2.08e-01 |
| 23-Aug-2017 | 04:00:00, | 2.07e-01 |
| 23-Aug-2017 | 04:15:00, | 2.08e-01 |
| 23-Aug-2017 | 04:30:00, | 2.08e-01 |
| 23-Aug-2017 | 04:45:00, | 2.08e-01 |
| 23-Aug-2017 | 05:00:00, | 2.07e-01 |
| 23-Aug-2017 | 05:15:00, | 2.08e-01 |
| 23-Aug-2017 | 05:30:00, | 2.07e-01 |
| 23-Aug-2017 | 05:45:00, | 2.07e-01 |
| 23-Aug-2017 | 06:00:00, | 2.07e-01 |
| 23-Aug-2017 | 06:15:00, | 2.07e-01 |
| 23-Aug-2017 | 06:30:00, | 2.07e-01 |
| 23-Aug-2017 | 06:45:00, | 2.07e-01 |
| 23-Aug-2017 | 07:00:00, | 2.07e-01 |
| 23-Aug-2017 | 07:15:00, | 2.07e-01 |
| 23-Aug-2017 | 07:30:00, | 2.07e-01 |
| 23-Aug-2017 | 07:45:00, | 2.07e-01 |
| 23-Aug-2017 | 08:00:00, | 2.07e-01 |
| 23-Aug-2017 | 08:15:00, | 2.07e-01 |
| 23-Aug-2017 | 08:30:00, | 2.07e-01 |
| 23-Aug-2017 | 08:45:00, | 2.07e-01 |
| 23-Aug-2017 | 09:00:00, | 2.07e-01 |
| 23-Aug-2017 | 09:15:00, | 2.07e-01 |
| 23-Aug-2017 | 09:30:00, | 2.07e-01 |
| 23-Aug-2017 | 09:45:00, | 2.07e-01 |
| 23-Aug-2017 | 10:00:00, | 2.07e-01 |
| 23-Aug-2017 | 10:15:00, | 2.07e-01 |
| 23-Aug-2017 | 10:30:00, | 2.07e-01 |
| 23-Aug-2017 | 10:45:00, | 2.07e-01 |
| 23-Aug-2017 | 11:00:00, | 2.07e-01 |
| 23-Aug-2017 | 11:15:00, | 2.07e-01 |
| 23-Aug-2017 | 11:30:00, | 2.06e-01 |
| 23-Aug-2017 | 11:45:00, | 2.06e-01 |
| 23-Aug-2017 | 12:00:00, | 2.06e-01 |
| 23-Aug-2017 | 12:15:00, | 2.06e-01 |
| 23-Aug-2017 | 12:30:00, | 2.06e-01 |
| 23-Aug-2017 | 12:45:00, | 2.06e-01 |
| 23-Aug-2017 | 13:00:00, | 2.06e-01 |
| 23-Aug-2017 | 13:15:00, | 2.06e-01 |
| 23-Aug-2017 | 13:30:00, | 2.06e-01 |
| 23-Aug-2017 | 13:45:00, | 2.06e-01 |
| 23-Aug-2017 | 14:00:00, | 2.06e-01 |
| 23-Aug-2017 | 14:15:00, | 2.06e-01 |
| 23-Aug-2017 | 14:30:00, | 2.06e-01 |
| 23-Aug-2017 | 14:45:00, | 2.06e-01 |
| 23-Aug-2017 | 15:00:00, | 2.06e-01 |
| 23-Aug-2017 | 15:15:00, | 2.06e-01 |
| 23-Aug-2017 | 15:30:00, | 2.05e-01 |
| 23-Aug-2017 | 15:45:00, | 2.05e-01 |
| 23-Aug-2017 | 16:00:00, | 2.05e-01 |
| 23-Aug-2017 | 16:15:00, | 2.05e-01 |
| 23-Aug-2017 | 16:30:00, | 2.05e-01 |
| 23-Aug-2017 | 16:45:00, | 2.05e-01 |
| 23-Aug-2017 | 17:00:00, | 2.05e-01 |
| 23-Aug-2017 | 17:15:00, | 2.05e-01 |
| 23-Aug-2017 | 17:30:00, | 2.05e-01 |
| 23-Aug-2017 | 17:45:00, | 2.05e-01 |
| 23-Aug-2017 | 18:00:00, | 2.05e-01 |
| 23-Aug-2017 | 18:15:00, | 2.05e-01 |
| 23-Aug-2017 | 18:30:00, | 2.05e-01 |
| 23-Aug-2017 | 18:45:00, | 2.05e-01 |
| 23-Aug-2017 | 19:00:00, | 2.05e-01 |
| 23-Aug-2017 | 19:15:00, | 2.05e-01 |
| 23-Aug-2017 | 19:30:00, | 2.05e-01 |

23-Aug-2017 19:45:00, 2.05e-01  
23-Aug-2017 20:00:00, 2.05e-01  
23-Aug-2017 20:15:00, 2.05e-01  
23-Aug-2017 20:30:00, 2.06e-01  
23-Aug-2017 20:45:00, 2.06e-01  
23-Aug-2017 21:00:00, 2.06e-01  
23-Aug-2017 21:15:00, 2.06e-01  
23-Aug-2017 21:30:00, 2.06e-01  
23-Aug-2017 21:45:00, 2.06e-01  
23-Aug-2017 22:00:00, 2.06e-01  
23-Aug-2017 22:15:00, 2.06e-01  
23-Aug-2017 22:30:00, 2.06e-01  
23-Aug-2017 22:45:00, 2.06e-01  
23-Aug-2017 23:00:00, 2.06e-01  
23-Aug-2017 23:15:00, 2.06e-01  
23-Aug-2017 23:30:00, 2.06e-01  
23-Aug-2017 23:45:00, 2.06e-01  
24-Aug-2017, 2.06e-01  
24-Aug-2017 00:15:00, 2.06e-01  
24-Aug-2017 00:30:00, 2.06e-01  
24-Aug-2017 00:45:00, 2.06e-01  
24-Aug-2017 01:00:00, 2.06e-01  
24-Aug-2017 01:15:00, 2.06e-01  
24-Aug-2017 01:30:00, 2.06e-01  
24-Aug-2017 01:45:00, 2.06e-01  
24-Aug-2017 02:00:00, 2.06e-01  
24-Aug-2017 02:15:00, 2.06e-01  
24-Aug-2017 02:30:00, 2.06e-01  
24-Aug-2017 02:45:00, 2.06e-01  
24-Aug-2017 03:00:00, 2.06e-01  
24-Aug-2017 03:15:00, 2.06e-01  
24-Aug-2017 03:30:00, 2.06e-01  
24-Aug-2017 03:45:00, 2.06e-01  
24-Aug-2017 04:00:00, 2.06e-01  
24-Aug-2017 04:15:00, 2.06e-01  
24-Aug-2017 04:30:00, 2.06e-01  
24-Aug-2017 04:45:00, 2.06e-01  
24-Aug-2017 05:00:00, 2.06e-01  
24-Aug-2017 05:15:00, 2.06e-01  
24-Aug-2017 05:30:00, 2.06e-01  
24-Aug-2017 05:45:00, 2.06e-01  
24-Aug-2017 06:00:00, 2.06e-01  
24-Aug-2017 06:15:00, 2.06e-01  
24-Aug-2017 06:30:00, 2.06e-01  
24-Aug-2017 06:45:00, 2.06e-01  
24-Aug-2017 07:00:00, 2.06e-01  
24-Aug-2017 07:15:00, 2.06e-01  
24-Aug-2017 07:30:00, 2.06e-01  
24-Aug-2017 07:45:00, 2.06e-01  
24-Aug-2017 08:00:00, 2.06e-01  
24-Aug-2017 08:15:00, 2.06e-01  
24-Aug-2017 08:30:00, 2.06e-01  
24-Aug-2017 08:45:00, 2.06e-01  
24-Aug-2017 09:00:00, 2.06e-01  
24-Aug-2017 09:15:00, 2.06e-01  
24-Aug-2017 09:30:00, 2.06e-01  
24-Aug-2017 09:45:00, 2.06e-01  
24-Aug-2017 10:00:00, 2.06e-01  
24-Aug-2017 10:15:00, 2.06e-01  
24-Aug-2017 10:30:00, 2.05e-01  
24-Aug-2017 10:45:00, 2.06e-01  
24-Aug-2017 11:00:00, 2.05e-01  
24-Aug-2017 11:15:00, 2.05e-01  
24-Aug-2017 11:30:00, 2.05e-01

24-Aug-2017 11:45:00, 2.05e-01  
24-Aug-2017 12:00:00, 2.05e-01  
24-Aug-2017 12:15:00, 2.05e-01  
24-Aug-2017 12:30:00, 2.05e-01  
24-Aug-2017 12:45:00, 2.05e-01  
24-Aug-2017 13:00:00, 2.05e-01  
24-Aug-2017 13:15:00, 2.05e-01  
24-Aug-2017 13:30:00, 2.05e-01  
24-Aug-2017 13:45:00, 2.05e-01  
24-Aug-2017 14:00:00, 2.05e-01  
24-Aug-2017 14:15:00, 2.05e-01  
24-Aug-2017 14:30:00, 2.05e-01  
24-Aug-2017 14:45:00, 2.05e-01  
24-Aug-2017 15:00:00, 2.05e-01  
24-Aug-2017 15:15:00, 2.05e-01  
24-Aug-2017 15:30:00, 2.04e-01  
24-Aug-2017 15:45:00, 2.05e-01  
24-Aug-2017 16:00:00, 2.04e-01  
24-Aug-2017 16:15:00, 2.04e-01  
24-Aug-2017 16:30:00, 2.04e-01  
24-Aug-2017 16:45:00, 2.04e-01  
24-Aug-2017 17:00:00, 2.04e-01  
24-Aug-2017 17:15:00, 2.04e-01  
24-Aug-2017 17:30:00, 2.04e-01  
24-Aug-2017 17:45:00, 2.04e-01  
24-Aug-2017 18:00:00, 2.04e-01  
24-Aug-2017 18:15:00, 2.04e-01  
24-Aug-2017 18:30:00, 2.04e-01  
24-Aug-2017 18:45:00, 2.04e-01  
24-Aug-2017 19:00:00, 2.04e-01  
24-Aug-2017 19:15:00, 2.04e-01  
24-Aug-2017 19:30:00, 2.04e-01  
24-Aug-2017 19:45:00, 2.03e-01  
24-Aug-2017 20:00:00, 2.03e-01  
24-Aug-2017 20:15:00, 2.03e-01  
24-Aug-2017 20:30:00, 2.04e-01  
24-Aug-2017 20:45:00, 2.04e-01  
24-Aug-2017 21:00:00, 2.04e-01  
24-Aug-2017 21:15:00, 2.04e-01  
24-Aug-2017 21:30:00, 2.04e-01  
24-Aug-2017 21:45:00, 2.04e-01  
24-Aug-2017 22:00:00, 2.04e-01  
24-Aug-2017 22:15:00, 2.04e-01  
24-Aug-2017 22:30:00, 2.04e-01  
24-Aug-2017 22:45:00, 2.04e-01  
24-Aug-2017 23:00:00, 2.04e-01  
24-Aug-2017 23:15:00, 2.04e-01  
24-Aug-2017 23:30:00, 2.04e-01  
24-Aug-2017 23:45:00, 2.04e-01  
25-Aug-2017, 2.04e-01  
25-Aug-2017 00:15:00, 2.04e-01  
25-Aug-2017 00:30:00, 2.04e-01  
25-Aug-2017 00:45:00, 2.04e-01  
25-Aug-2017 01:00:00, 2.04e-01  
25-Aug-2017 01:15:00, 2.04e-01  
25-Aug-2017 01:30:00, 2.04e-01  
25-Aug-2017 01:45:00, 2.04e-01  
25-Aug-2017 02:00:00, 2.04e-01  
25-Aug-2017 02:15:00, 2.04e-01  
25-Aug-2017 02:30:00, 2.04e-01  
25-Aug-2017 02:45:00, 2.04e-01  
25-Aug-2017 03:00:00, 2.04e-01  
25-Aug-2017 03:15:00, 2.04e-01  
25-Aug-2017 03:30:00, 2.04e-01



|             |           |          |
|-------------|-----------|----------|
| 25-Aug-2017 | 03:45:00, | 2.04e-01 |
| 25-Aug-2017 | 04:00:00, | 2.04e-01 |
| 25-Aug-2017 | 04:15:00, | 2.04e-01 |
| 25-Aug-2017 | 04:30:00, | 2.04e-01 |
| 25-Aug-2017 | 04:45:00, | 2.04e-01 |
| 25-Aug-2017 | 05:00:00, | 2.04e-01 |
| 25-Aug-2017 | 05:15:00, | 2.04e-01 |
| 25-Aug-2017 | 05:30:00, | 2.04e-01 |
| 25-Aug-2017 | 05:45:00, | 2.04e-01 |
| 25-Aug-2017 | 06:00:00, | 2.04e-01 |
| 25-Aug-2017 | 06:15:00, | 2.04e-01 |
| 25-Aug-2017 | 06:30:00, | 2.04e-01 |
| 25-Aug-2017 | 06:45:00, | 2.04e-01 |
| 25-Aug-2017 | 07:00:00, | 2.04e-01 |
| 25-Aug-2017 | 07:15:00, | 2.04e-01 |
| 25-Aug-2017 | 07:30:00, | 2.04e-01 |
| 25-Aug-2017 | 07:45:00, | 2.04e-01 |
| 25-Aug-2017 | 08:00:00, | 2.04e-01 |
| 25-Aug-2017 | 08:15:00, | 2.04e-01 |
| 25-Aug-2017 | 08:30:00, | 2.04e-01 |
| 25-Aug-2017 | 08:45:00, | 2.04e-01 |
| 25-Aug-2017 | 09:00:00, | 2.03e-01 |
| 25-Aug-2017 | 09:15:00, | 2.03e-01 |
| 25-Aug-2017 | 09:30:00, | 2.03e-01 |
| 25-Aug-2017 | 09:45:00, | 2.03e-01 |
| 25-Aug-2017 | 10:00:00, | 2.03e-01 |
| 25-Aug-2017 | 10:15:00, | 2.03e-01 |
| 25-Aug-2017 | 10:30:00, | 2.03e-01 |
| 25-Aug-2017 | 10:45:00, | 2.03e-01 |
| 25-Aug-2017 | 11:00:00, | 2.03e-01 |
| 25-Aug-2017 | 11:15:00, | 2.03e-01 |
| 25-Aug-2017 | 11:30:00, | 2.03e-01 |
| 25-Aug-2017 | 11:45:00, | 2.03e-01 |
| 25-Aug-2017 | 12:00:00, | 2.03e-01 |
| 25-Aug-2017 | 12:15:00, | 2.03e-01 |
| 25-Aug-2017 | 12:30:00, | 2.03e-01 |
| 25-Aug-2017 | 12:45:00, | 2.03e-01 |
| 25-Aug-2017 | 13:00:00, | 2.02e-01 |
| 25-Aug-2017 | 13:15:00, | 2.02e-01 |
| 25-Aug-2017 | 13:30:00, | 2.02e-01 |
| 25-Aug-2017 | 13:45:00, | 2.03e-01 |
| 25-Aug-2017 | 14:00:00, | 2.03e-01 |
| 25-Aug-2017 | 14:15:00, | 2.02e-01 |
| 25-Aug-2017 | 14:30:00, | 2.02e-01 |
| 25-Aug-2017 | 14:45:00, | 2.02e-01 |
| 25-Aug-2017 | 15:00:00, | 2.02e-01 |
| 25-Aug-2017 | 15:15:00, | 2.02e-01 |
| 25-Aug-2017 | 15:30:00, | 2.02e-01 |
| 25-Aug-2017 | 15:45:00, | 2.02e-01 |
| 25-Aug-2017 | 16:00:00, | 2.02e-01 |
| 25-Aug-2017 | 16:15:00, | 2.02e-01 |
| 25-Aug-2017 | 16:30:00, | 2.02e-01 |
| 25-Aug-2017 | 16:45:00, | 2.02e-01 |
| 25-Aug-2017 | 17:00:00, | 2.02e-01 |
| 25-Aug-2017 | 17:15:00, | 2.02e-01 |
| 25-Aug-2017 | 17:30:00, | 2.02e-01 |
| 25-Aug-2017 | 17:45:00, | 2.02e-01 |
| 25-Aug-2017 | 18:00:00, | 2.02e-01 |
| 25-Aug-2017 | 18:15:00, | 2.02e-01 |
| 25-Aug-2017 | 18:30:00, | 2.02e-01 |
| 25-Aug-2017 | 18:45:00, | 2.02e-01 |
| 25-Aug-2017 | 19:00:00, | 2.02e-01 |
| 25-Aug-2017 | 19:15:00, | NaN      |
| 25-Aug-2017 | 19:30:00, | NaN      |

|              |           |     |
|--------------|-----------|-----|
| 25-Aug-2017  | 19:45:00, | NaN |
| 25-Aug-2017  | 20:00:00, | NaN |
| 25-Aug-2017  | 20:15:00, | NaN |
| 25-Aug-2017  | 20:30:00, | NaN |
| 25-Aug-2017  | 20:45:00, | NaN |
| 25-Aug-2017  | 21:00:00, | NaN |
| 25-Aug-2017  | 21:15:00, | NaN |
| 25-Aug-2017  | 21:30:00, | NaN |
| 25-Aug-2017  | 21:45:00, | NaN |
| 25-Aug-2017  | 22:00:00, | NaN |
| 25-Aug-2017  | 22:15:00, | NaN |
| 25-Aug-2017  | 22:30:00, | NaN |
| 25-Aug-2017  | 22:45:00, | NaN |
| 25-Aug-2017  | 23:00:00, | NaN |
| 25-Aug-2017  | 23:15:00, | NaN |
| 25-Aug-2017  | 23:30:00, | NaN |
| 25-Aug-2017  | 23:45:00, | NaN |
| 26-Aug-2017, |           | NaN |
| 26-Aug-2017  | 00:15:00, | NaN |
| 26-Aug-2017  | 00:30:00, | NaN |
| 26-Aug-2017  | 00:45:00, | NaN |
| 26-Aug-2017  | 01:00:00, | NaN |
| 26-Aug-2017  | 01:15:00, | NaN |
| 26-Aug-2017  | 01:30:00, | NaN |
| 26-Aug-2017  | 01:45:00, | NaN |
| 26-Aug-2017  | 02:00:00, | NaN |
| 26-Aug-2017  | 02:15:00, | NaN |
| 26-Aug-2017  | 02:30:00, | NaN |
| 26-Aug-2017  | 02:45:00, | NaN |
| 26-Aug-2017  | 03:00:00, | NaN |
| 26-Aug-2017  | 03:15:00, | NaN |
| 26-Aug-2017  | 03:30:00, | NaN |
| 26-Aug-2017  | 03:45:00, | NaN |
| 26-Aug-2017  | 04:00:00, | NaN |
| 26-Aug-2017  | 04:15:00, | NaN |
| 26-Aug-2017  | 04:30:00, | NaN |
| 26-Aug-2017  | 04:45:00, | NaN |
| 26-Aug-2017  | 05:00:00, | NaN |
| 26-Aug-2017  | 05:15:00, | NaN |
| 26-Aug-2017  | 05:30:00, | NaN |
| 26-Aug-2017  | 05:45:00, | NaN |
| 26-Aug-2017  | 06:00:00, | NaN |
| 26-Aug-2017  | 06:15:00, | NaN |
| 26-Aug-2017  | 06:30:00, | NaN |
| 26-Aug-2017  | 06:45:00, | NaN |
| 26-Aug-2017  | 07:00:00, | NaN |
| 26-Aug-2017  | 07:15:00, | NaN |
| 26-Aug-2017  | 07:30:00, | NaN |
| 26-Aug-2017  | 07:45:00, | NaN |
| 26-Aug-2017  | 08:00:00, | NaN |
| 26-Aug-2017  | 08:15:00, | NaN |
| 26-Aug-2017  | 08:30:00, | NaN |
| 26-Aug-2017  | 08:45:00, | NaN |
| 26-Aug-2017  | 09:00:00, | NaN |
| 26-Aug-2017  | 09:15:00, | NaN |
| 26-Aug-2017  | 09:30:00, | NaN |
| 26-Aug-2017  | 09:45:00, | NaN |
| 26-Aug-2017  | 10:00:00, | NaN |
| 26-Aug-2017  | 10:15:00, | NaN |
| 26-Aug-2017  | 10:30:00, | NaN |
| 26-Aug-2017  | 10:45:00, | NaN |
| 26-Aug-2017  | 11:00:00, | NaN |
| 26-Aug-2017  | 11:15:00, | NaN |
| 26-Aug-2017  | 11:30:00, | NaN |

|              |           |     |
|--------------|-----------|-----|
| 26-Aug-2017  | 11:45:00, | NaN |
| 26-Aug-2017  | 12:00:00, | NaN |
| 26-Aug-2017  | 12:15:00, | NaN |
| 26-Aug-2017  | 12:30:00, | NaN |
| 26-Aug-2017  | 12:45:00, | NaN |
| 26-Aug-2017  | 13:00:00, | NaN |
| 26-Aug-2017  | 13:15:00, | NaN |
| 26-Aug-2017  | 13:30:00, | NaN |
| 26-Aug-2017  | 13:45:00, | NaN |
| 26-Aug-2017  | 14:00:00, | NaN |
| 26-Aug-2017  | 14:15:00, | NaN |
| 26-Aug-2017  | 14:30:00, | NaN |
| 26-Aug-2017  | 14:45:00, | NaN |
| 26-Aug-2017  | 15:00:00, | NaN |
| 26-Aug-2017  | 15:15:00, | NaN |
| 26-Aug-2017  | 15:30:00, | NaN |
| 26-Aug-2017  | 15:45:00, | NaN |
| 26-Aug-2017  | 16:00:00, | NaN |
| 26-Aug-2017  | 16:15:00, | NaN |
| 26-Aug-2017  | 16:30:00, | NaN |
| 26-Aug-2017  | 16:45:00, | NaN |
| 26-Aug-2017  | 17:00:00, | NaN |
| 26-Aug-2017  | 17:15:00, | NaN |
| 26-Aug-2017  | 17:30:00, | NaN |
| 26-Aug-2017  | 17:45:00, | NaN |
| 26-Aug-2017  | 18:00:00, | NaN |
| 26-Aug-2017  | 18:15:00, | NaN |
| 26-Aug-2017  | 18:30:00, | NaN |
| 26-Aug-2017  | 18:45:00, | NaN |
| 26-Aug-2017  | 19:00:00, | NaN |
| 26-Aug-2017  | 19:15:00, | NaN |
| 26-Aug-2017  | 19:30:00, | NaN |
| 26-Aug-2017  | 19:45:00, | NaN |
| 26-Aug-2017  | 20:00:00, | NaN |
| 26-Aug-2017  | 20:15:00, | NaN |
| 26-Aug-2017  | 20:30:00, | NaN |
| 26-Aug-2017  | 20:45:00, | NaN |
| 26-Aug-2017  | 21:00:00, | NaN |
| 26-Aug-2017  | 21:15:00, | NaN |
| 26-Aug-2017  | 21:30:00, | NaN |
| 26-Aug-2017  | 21:45:00, | NaN |
| 26-Aug-2017  | 22:00:00, | NaN |
| 26-Aug-2017  | 22:15:00, | NaN |
| 26-Aug-2017  | 22:30:00, | NaN |
| 26-Aug-2017  | 22:45:00, | NaN |
| 26-Aug-2017  | 23:00:00, | NaN |
| 26-Aug-2017  | 23:15:00, | NaN |
| 26-Aug-2017  | 23:30:00, | NaN |
| 26-Aug-2017  | 23:45:00, | NaN |
| 27-Aug-2017, | NaN       |     |
| 27-Aug-2017  | 00:15:00, | NaN |
| 27-Aug-2017  | 00:30:00, | NaN |
| 27-Aug-2017  | 00:45:00, | NaN |
| 27-Aug-2017  | 01:00:00, | NaN |
| 27-Aug-2017  | 01:15:00, | NaN |
| 27-Aug-2017  | 01:30:00, | NaN |
| 27-Aug-2017  | 01:45:00, | NaN |
| 27-Aug-2017  | 02:00:00, | NaN |
| 27-Aug-2017  | 02:15:00, | NaN |
| 27-Aug-2017  | 02:30:00, | NaN |
| 27-Aug-2017  | 02:45:00, | NaN |
| 27-Aug-2017  | 03:00:00, | NaN |
| 27-Aug-2017  | 03:15:00, | NaN |
| 27-Aug-2017  | 03:30:00, | NaN |

|             |           |     |
|-------------|-----------|-----|
| 27-Aug-2017 | 03:45:00, | NaN |
| 27-Aug-2017 | 04:00:00, | NaN |
| 27-Aug-2017 | 04:15:00, | NaN |
| 27-Aug-2017 | 04:30:00, | NaN |
| 27-Aug-2017 | 04:45:00, | NaN |
| 27-Aug-2017 | 05:00:00, | NaN |
| 27-Aug-2017 | 05:15:00, | NaN |
| 27-Aug-2017 | 05:30:00, | NaN |
| 27-Aug-2017 | 05:45:00, | NaN |
| 27-Aug-2017 | 06:00:00, | NaN |
| 27-Aug-2017 | 06:15:00, | NaN |
| 27-Aug-2017 | 06:30:00, | NaN |
| 27-Aug-2017 | 06:45:00, | NaN |
| 27-Aug-2017 | 07:00:00, | NaN |
| 27-Aug-2017 | 07:15:00, | NaN |
| 27-Aug-2017 | 07:30:00, | NaN |
| 27-Aug-2017 | 07:45:00, | NaN |
| 27-Aug-2017 | 08:00:00, | NaN |
| 27-Aug-2017 | 08:15:00, | NaN |
| 27-Aug-2017 | 08:30:00, | NaN |
| 27-Aug-2017 | 08:45:00, | NaN |
| 27-Aug-2017 | 09:00:00, | NaN |
| 27-Aug-2017 | 09:15:00, | NaN |
| 27-Aug-2017 | 09:30:00, | NaN |
| 27-Aug-2017 | 09:45:00, | NaN |
| 27-Aug-2017 | 10:00:00, | NaN |
| 27-Aug-2017 | 10:15:00, | NaN |
| 27-Aug-2017 | 10:30:00, | NaN |
| 27-Aug-2017 | 10:45:00, | NaN |
| 27-Aug-2017 | 11:00:00, | NaN |
| 27-Aug-2017 | 11:15:00, | NaN |
| 27-Aug-2017 | 11:30:00, | NaN |
| 27-Aug-2017 | 11:45:00, | NaN |
| 27-Aug-2017 | 12:00:00, | NaN |
| 27-Aug-2017 | 12:15:00, | NaN |
| 27-Aug-2017 | 12:30:00, | NaN |
| 27-Aug-2017 | 12:45:00, | NaN |
| 27-Aug-2017 | 13:00:00, | NaN |
| 27-Aug-2017 | 13:15:00, | NaN |
| 27-Aug-2017 | 13:30:00, | NaN |
| 27-Aug-2017 | 13:45:00, | NaN |
| 27-Aug-2017 | 14:00:00, | NaN |
| 27-Aug-2017 | 14:15:00, | NaN |
| 27-Aug-2017 | 14:30:00, | NaN |
| 27-Aug-2017 | 14:45:00, | NaN |
| 27-Aug-2017 | 15:00:00, | NaN |
| 27-Aug-2017 | 15:15:00, | NaN |
| 27-Aug-2017 | 15:30:00, | NaN |
| 27-Aug-2017 | 15:45:00, | NaN |
| 27-Aug-2017 | 16:00:00, | NaN |
| 27-Aug-2017 | 16:15:00, | NaN |
| 27-Aug-2017 | 16:30:00, | NaN |
| 27-Aug-2017 | 16:45:00, | NaN |
| 27-Aug-2017 | 17:00:00, | NaN |
| 27-Aug-2017 | 17:15:00, | NaN |
| 27-Aug-2017 | 17:30:00, | NaN |
| 27-Aug-2017 | 17:45:00, | NaN |
| 27-Aug-2017 | 18:00:00, | NaN |
| 27-Aug-2017 | 18:15:00, | NaN |
| 27-Aug-2017 | 18:30:00, | NaN |
| 27-Aug-2017 | 18:45:00, | NaN |
| 27-Aug-2017 | 19:00:00, | NaN |
| 27-Aug-2017 | 19:15:00, | NaN |
| 27-Aug-2017 | 19:30:00, | NaN |

|              |           |     |
|--------------|-----------|-----|
| 27-Aug-2017  | 19:45:00, | NaN |
| 27-Aug-2017  | 20:00:00, | NaN |
| 27-Aug-2017  | 20:15:00, | NaN |
| 27-Aug-2017  | 20:30:00, | NaN |
| 27-Aug-2017  | 20:45:00, | NaN |
| 27-Aug-2017  | 21:00:00, | NaN |
| 27-Aug-2017  | 21:15:00, | NaN |
| 27-Aug-2017  | 21:30:00, | NaN |
| 27-Aug-2017  | 21:45:00, | NaN |
| 27-Aug-2017  | 22:00:00, | NaN |
| 27-Aug-2017  | 22:15:00, | NaN |
| 27-Aug-2017  | 22:30:00, | NaN |
| 27-Aug-2017  | 22:45:00, | NaN |
| 27-Aug-2017  | 23:00:00, | NaN |
| 27-Aug-2017  | 23:15:00, | NaN |
| 27-Aug-2017  | 23:30:00, | NaN |
| 27-Aug-2017  | 23:45:00, | NaN |
| 28-Aug-2017, |           | NaN |
| 28-Aug-2017  | 00:15:00, | NaN |
| 28-Aug-2017  | 00:30:00, | NaN |
| 28-Aug-2017  | 00:45:00, | NaN |
| 28-Aug-2017  | 01:00:00, | NaN |
| 28-Aug-2017  | 01:15:00, | NaN |
| 28-Aug-2017  | 01:30:00, | NaN |
| 28-Aug-2017  | 01:45:00, | NaN |
| 28-Aug-2017  | 02:00:00, | NaN |
| 28-Aug-2017  | 02:15:00, | NaN |
| 28-Aug-2017  | 02:30:00, | NaN |
| 28-Aug-2017  | 02:45:00, | NaN |
| 28-Aug-2017  | 03:00:00, | NaN |
| 28-Aug-2017  | 03:15:00, | NaN |
| 28-Aug-2017  | 03:30:00, | NaN |
| 28-Aug-2017  | 03:45:00, | NaN |
| 28-Aug-2017  | 04:00:00, | NaN |
| 28-Aug-2017  | 04:15:00, | NaN |
| 28-Aug-2017  | 04:30:00, | NaN |
| 28-Aug-2017  | 04:45:00, | NaN |
| 28-Aug-2017  | 05:00:00, | NaN |
| 28-Aug-2017  | 05:15:00, | NaN |
| 28-Aug-2017  | 05:30:00, | NaN |
| 28-Aug-2017  | 05:45:00, | NaN |
| 28-Aug-2017  | 06:00:00, | NaN |
| 28-Aug-2017  | 06:15:00, | NaN |
| 28-Aug-2017  | 06:30:00, | NaN |
| 28-Aug-2017  | 06:45:00, | NaN |
| 28-Aug-2017  | 07:00:00, | NaN |
| 28-Aug-2017  | 07:15:00, | NaN |
| 28-Aug-2017  | 07:30:00, | NaN |
| 28-Aug-2017  | 07:45:00, | NaN |
| 28-Aug-2017  | 08:00:00, | NaN |
| 28-Aug-2017  | 08:15:00, | NaN |
| 28-Aug-2017  | 08:30:00, | NaN |
| 28-Aug-2017  | 08:45:00, | NaN |
| 28-Aug-2017  | 09:00:00, | NaN |
| 28-Aug-2017  | 09:15:00, | NaN |
| 28-Aug-2017  | 09:30:00, | NaN |
| 28-Aug-2017  | 09:45:00, | NaN |
| 28-Aug-2017  | 10:00:00, | NaN |
| 28-Aug-2017  | 10:15:00, | NaN |
| 28-Aug-2017  | 10:30:00, | NaN |
| 28-Aug-2017  | 10:45:00, | NaN |
| 28-Aug-2017  | 11:00:00, | NaN |
| 28-Aug-2017  | 11:15:00, | NaN |
| 28-Aug-2017  | 11:30:00, | NaN |

|              |           |     |
|--------------|-----------|-----|
| 28-Aug-2017  | 11:45:00, | NaN |
| 28-Aug-2017  | 12:00:00, | NaN |
| 28-Aug-2017  | 12:15:00, | NaN |
| 28-Aug-2017  | 12:30:00, | NaN |
| 28-Aug-2017  | 12:45:00, | NaN |
| 28-Aug-2017  | 13:00:00, | NaN |
| 28-Aug-2017  | 13:15:00, | NaN |
| 28-Aug-2017  | 13:30:00, | NaN |
| 28-Aug-2017  | 13:45:00, | NaN |
| 28-Aug-2017  | 14:00:00, | NaN |
| 28-Aug-2017  | 14:15:00, | NaN |
| 28-Aug-2017  | 14:30:00, | NaN |
| 28-Aug-2017  | 14:45:00, | NaN |
| 28-Aug-2017  | 15:00:00, | NaN |
| 28-Aug-2017  | 15:15:00, | NaN |
| 28-Aug-2017  | 15:30:00, | NaN |
| 28-Aug-2017  | 15:45:00, | NaN |
| 28-Aug-2017  | 16:00:00, | NaN |
| 28-Aug-2017  | 16:15:00, | NaN |
| 28-Aug-2017  | 16:30:00, | NaN |
| 28-Aug-2017  | 16:45:00, | NaN |
| 28-Aug-2017  | 17:00:00, | NaN |
| 28-Aug-2017  | 17:15:00, | NaN |
| 28-Aug-2017  | 17:30:00, | NaN |
| 28-Aug-2017  | 17:45:00, | NaN |
| 28-Aug-2017  | 18:00:00, | NaN |
| 28-Aug-2017  | 18:15:00, | NaN |
| 28-Aug-2017  | 18:30:00, | NaN |
| 28-Aug-2017  | 18:45:00, | NaN |
| 28-Aug-2017  | 19:00:00, | NaN |
| 28-Aug-2017  | 19:15:00, | NaN |
| 28-Aug-2017  | 19:30:00, | NaN |
| 28-Aug-2017  | 19:45:00, | NaN |
| 28-Aug-2017  | 20:00:00, | NaN |
| 28-Aug-2017  | 20:15:00, | NaN |
| 28-Aug-2017  | 20:30:00, | NaN |
| 28-Aug-2017  | 20:45:00, | NaN |
| 28-Aug-2017  | 21:00:00, | NaN |
| 28-Aug-2017  | 21:15:00, | NaN |
| 28-Aug-2017  | 21:30:00, | NaN |
| 28-Aug-2017  | 21:45:00, | NaN |
| 28-Aug-2017  | 22:00:00, | NaN |
| 28-Aug-2017  | 22:15:00, | NaN |
| 28-Aug-2017  | 22:30:00, | NaN |
| 28-Aug-2017  | 22:45:00, | NaN |
| 28-Aug-2017  | 23:00:00, | NaN |
| 28-Aug-2017  | 23:15:00, | NaN |
| 28-Aug-2017  | 23:30:00, | NaN |
| 28-Aug-2017  | 23:45:00, | NaN |
| 29-Aug-2017, | NaN       |     |
| 29-Aug-2017  | 00:15:00, | NaN |
| 29-Aug-2017  | 00:30:00, | NaN |
| 29-Aug-2017  | 00:45:00, | NaN |
| 29-Aug-2017  | 01:00:00, | NaN |
| 29-Aug-2017  | 01:15:00, | NaN |
| 29-Aug-2017  | 01:30:00, | NaN |
| 29-Aug-2017  | 01:45:00, | NaN |
| 29-Aug-2017  | 02:00:00, | NaN |
| 29-Aug-2017  | 02:15:00, | NaN |
| 29-Aug-2017  | 02:30:00, | NaN |
| 29-Aug-2017  | 02:45:00, | NaN |
| 29-Aug-2017  | 03:00:00, | NaN |
| 29-Aug-2017  | 03:15:00, | NaN |
| 29-Aug-2017  | 03:30:00, | NaN |

|             |           |     |
|-------------|-----------|-----|
| 29-Aug-2017 | 03:45:00, | NaN |
| 29-Aug-2017 | 04:00:00, | NaN |
| 29-Aug-2017 | 04:15:00, | NaN |
| 29-Aug-2017 | 04:30:00, | NaN |
| 29-Aug-2017 | 04:45:00, | NaN |
| 29-Aug-2017 | 05:00:00, | NaN |
| 29-Aug-2017 | 05:15:00, | NaN |
| 29-Aug-2017 | 05:30:00, | NaN |
| 29-Aug-2017 | 05:45:00, | NaN |
| 29-Aug-2017 | 06:00:00, | NaN |
| 29-Aug-2017 | 06:15:00, | NaN |
| 29-Aug-2017 | 06:30:00, | NaN |
| 29-Aug-2017 | 06:45:00, | NaN |
| 29-Aug-2017 | 07:00:00, | NaN |
| 29-Aug-2017 | 07:15:00, | NaN |
| 29-Aug-2017 | 07:30:00, | NaN |
| 29-Aug-2017 | 07:45:00, | NaN |
| 29-Aug-2017 | 08:00:00, | NaN |
| 29-Aug-2017 | 08:15:00, | NaN |
| 29-Aug-2017 | 08:30:00, | NaN |
| 29-Aug-2017 | 08:45:00, | NaN |
| 29-Aug-2017 | 09:00:00, | NaN |
| 29-Aug-2017 | 09:15:00, | NaN |
| 29-Aug-2017 | 09:30:00, | NaN |
| 29-Aug-2017 | 09:45:00, | NaN |
| 29-Aug-2017 | 10:00:00, | NaN |
| 29-Aug-2017 | 10:15:00, | NaN |
| 29-Aug-2017 | 10:30:00, | NaN |
| 29-Aug-2017 | 10:45:00, | NaN |
| 29-Aug-2017 | 11:00:00, | NaN |
| 29-Aug-2017 | 11:15:00, | NaN |
| 29-Aug-2017 | 11:30:00, | NaN |
| 29-Aug-2017 | 11:45:00, | NaN |
| 29-Aug-2017 | 12:00:00, | NaN |
| 29-Aug-2017 | 12:15:00, | NaN |
| 29-Aug-2017 | 12:30:00, | NaN |
| 29-Aug-2017 | 12:45:00, | NaN |
| 29-Aug-2017 | 13:00:00, | NaN |
| 29-Aug-2017 | 13:15:00, | NaN |
| 29-Aug-2017 | 13:30:00, | NaN |
| 29-Aug-2017 | 13:45:00, | NaN |
| 29-Aug-2017 | 14:00:00, | NaN |
| 29-Aug-2017 | 14:15:00, | NaN |
| 29-Aug-2017 | 14:30:00, | NaN |
| 29-Aug-2017 | 14:45:00, | NaN |
| 29-Aug-2017 | 15:00:00, | NaN |
| 29-Aug-2017 | 15:15:00, | NaN |
| 29-Aug-2017 | 15:30:00, | NaN |
| 29-Aug-2017 | 15:45:00, | NaN |
| 29-Aug-2017 | 16:00:00, | NaN |
| 29-Aug-2017 | 16:15:00, | NaN |
| 29-Aug-2017 | 16:30:00, | NaN |
| 29-Aug-2017 | 16:45:00, | NaN |
| 29-Aug-2017 | 17:00:00, | NaN |
| 29-Aug-2017 | 17:15:00, | NaN |
| 29-Aug-2017 | 17:30:00, | NaN |
| 29-Aug-2017 | 17:45:00, | NaN |
| 29-Aug-2017 | 18:00:00, | NaN |
| 29-Aug-2017 | 18:15:00, | NaN |
| 29-Aug-2017 | 18:30:00, | NaN |
| 29-Aug-2017 | 18:45:00, | NaN |
| 29-Aug-2017 | 19:00:00, | NaN |
| 29-Aug-2017 | 19:15:00, | NaN |
| 29-Aug-2017 | 19:30:00, | NaN |

|              |           |     |
|--------------|-----------|-----|
| 29-Aug-2017  | 19:45:00, | NaN |
| 29-Aug-2017  | 20:00:00, | NaN |
| 29-Aug-2017  | 20:15:00, | NaN |
| 29-Aug-2017  | 20:30:00, | NaN |
| 29-Aug-2017  | 20:45:00, | NaN |
| 29-Aug-2017  | 21:00:00, | NaN |
| 29-Aug-2017  | 21:15:00, | NaN |
| 29-Aug-2017  | 21:30:00, | NaN |
| 29-Aug-2017  | 21:45:00, | NaN |
| 29-Aug-2017  | 22:00:00, | NaN |
| 29-Aug-2017  | 22:15:00, | NaN |
| 29-Aug-2017  | 22:30:00, | NaN |
| 29-Aug-2017  | 22:45:00, | NaN |
| 29-Aug-2017  | 23:00:00, | NaN |
| 29-Aug-2017  | 23:15:00, | NaN |
| 29-Aug-2017  | 23:30:00, | NaN |
| 29-Aug-2017  | 23:45:00, | NaN |
| 30-Aug-2017, |           | NaN |
| 30-Aug-2017  | 00:15:00, | NaN |
| 30-Aug-2017  | 00:30:00, | NaN |
| 30-Aug-2017  | 00:45:00, | NaN |
| 30-Aug-2017  | 01:00:00, | NaN |
| 30-Aug-2017  | 01:15:00, | NaN |
| 30-Aug-2017  | 01:30:00, | NaN |
| 30-Aug-2017  | 01:45:00, | NaN |
| 30-Aug-2017  | 02:00:00, | NaN |
| 30-Aug-2017  | 02:15:00, | NaN |
| 30-Aug-2017  | 02:30:00, | NaN |
| 30-Aug-2017  | 02:45:00, | NaN |
| 30-Aug-2017  | 03:00:00, | NaN |
| 30-Aug-2017  | 03:15:00, | NaN |
| 30-Aug-2017  | 03:30:00, | NaN |
| 30-Aug-2017  | 03:45:00, | NaN |
| 30-Aug-2017  | 04:00:00, | NaN |
| 30-Aug-2017  | 04:15:00, | NaN |
| 30-Aug-2017  | 04:30:00, | NaN |
| 30-Aug-2017  | 04:45:00, | NaN |
| 30-Aug-2017  | 05:00:00, | NaN |
| 30-Aug-2017  | 05:15:00, | NaN |
| 30-Aug-2017  | 05:30:00, | NaN |
| 30-Aug-2017  | 05:45:00, | NaN |
| 30-Aug-2017  | 06:00:00, | NaN |
| 30-Aug-2017  | 06:15:00, | NaN |
| 30-Aug-2017  | 06:30:00, | NaN |
| 30-Aug-2017  | 06:45:00, | NaN |
| 30-Aug-2017  | 07:00:00, | NaN |
| 30-Aug-2017  | 07:15:00, | NaN |
| 30-Aug-2017  | 07:30:00, | NaN |
| 30-Aug-2017  | 07:45:00, | NaN |
| 30-Aug-2017  | 08:00:00, | NaN |
| 30-Aug-2017  | 08:15:00, | NaN |
| 30-Aug-2017  | 08:30:00, | NaN |
| 30-Aug-2017  | 08:45:00, | NaN |
| 30-Aug-2017  | 09:00:00, | NaN |
| 30-Aug-2017  | 09:15:00, | NaN |
| 30-Aug-2017  | 09:30:00, | NaN |
| 30-Aug-2017  | 09:45:00, | NaN |
| 30-Aug-2017  | 10:00:00, | NaN |
| 30-Aug-2017  | 10:15:00, | NaN |
| 30-Aug-2017  | 10:30:00, | NaN |
| 30-Aug-2017  | 10:45:00, | NaN |
| 30-Aug-2017  | 11:00:00, | NaN |
| 30-Aug-2017  | 11:15:00, | NaN |
| 30-Aug-2017  | 11:30:00, | NaN |



30-Aug-2017 11:45:00, NaN  
30-Aug-2017 12:00:00, NaN  
30-Aug-2017 12:15:00, NaN  
30-Aug-2017 12:30:00, NaN  
30-Aug-2017 12:45:00, NaN  
30-Aug-2017 13:00:00, NaN  
30-Aug-2017 13:15:00, NaN  
30-Aug-2017 13:30:00, NaN  
30-Aug-2017 13:45:00, NaN  
30-Aug-2017 14:00:00, NaN  
30-Aug-2017 14:15:00, NaN  
30-Aug-2017 14:30:00, NaN  
30-Aug-2017 14:45:00, NaN  
30-Aug-2017 15:00:00, NaN  
30-Aug-2017 15:15:00, NaN  
30-Aug-2017 15:30:00, NaN  
30-Aug-2017 15:45:00, NaN  
30-Aug-2017 16:00:00, NaN  
30-Aug-2017 16:15:00, NaN  
30-Aug-2017 16:30:00, NaN  
30-Aug-2017 16:45:00, NaN  
30-Aug-2017 17:00:00, NaN  
30-Aug-2017 17:15:00, NaN  
30-Aug-2017 17:30:00, NaN  
30-Aug-2017 17:45:00, NaN  
30-Aug-2017 18:00:00, NaN  
30-Aug-2017 18:15:00, NaN  
30-Aug-2017 18:30:00, NaN  
30-Aug-2017 18:45:00, NaN  
30-Aug-2017 19:00:00, NaN  
30-Aug-2017 19:15:00, NaN  
30-Aug-2017 19:30:00, NaN  
30-Aug-2017 19:45:00, NaN  
30-Aug-2017 20:00:00, NaN  
30-Aug-2017 20:15:00, NaN  
30-Aug-2017 20:30:00, NaN  
30-Aug-2017 20:45:00, NaN  
30-Aug-2017 21:00:00, NaN  
30-Aug-2017 21:15:00, NaN  
30-Aug-2017 21:30:00, NaN  
30-Aug-2017 21:45:00, NaN  
30-Aug-2017 22:00:00, NaN  
30-Aug-2017 22:15:00, NaN  
30-Aug-2017 22:30:00, NaN  
30-Aug-2017 22:45:00, NaN  
30-Aug-2017 23:00:00, NaN  
30-Aug-2017 23:15:00, NaN  
30-Aug-2017 23:30:00, NaN  
30-Aug-2017 23:45:00, NaN  
31-Aug-2017, NaN  
31-Aug-2017 00:15:00, NaN  
31-Aug-2017 00:30:00, NaN  
31-Aug-2017 00:45:00, NaN  
31-Aug-2017 01:00:00, NaN  
31-Aug-2017 01:15:00, NaN  
31-Aug-2017 01:30:00, NaN  
31-Aug-2017 01:45:00, NaN  
31-Aug-2017 02:00:00, NaN  
31-Aug-2017 02:15:00, NaN  
31-Aug-2017 02:30:00, NaN  
31-Aug-2017 02:45:00, NaN  
31-Aug-2017 03:00:00, NaN  
31-Aug-2017 03:15:00, NaN  
31-Aug-2017 03:30:00, NaN

|             |           |     |
|-------------|-----------|-----|
| 31-Aug-2017 | 03:45:00, | NaN |
| 31-Aug-2017 | 04:00:00, | NaN |
| 31-Aug-2017 | 04:15:00, | NaN |
| 31-Aug-2017 | 04:30:00, | NaN |
| 31-Aug-2017 | 04:45:00, | NaN |
| 31-Aug-2017 | 05:00:00, | NaN |
| 31-Aug-2017 | 05:15:00, | NaN |
| 31-Aug-2017 | 05:30:00, | NaN |
| 31-Aug-2017 | 05:45:00, | NaN |
| 31-Aug-2017 | 06:00:00, | NaN |
| 31-Aug-2017 | 06:15:00, | NaN |
| 31-Aug-2017 | 06:30:00, | NaN |
| 31-Aug-2017 | 06:45:00, | NaN |
| 31-Aug-2017 | 07:00:00, | NaN |
| 31-Aug-2017 | 07:15:00, | NaN |
| 31-Aug-2017 | 07:30:00, | NaN |
| 31-Aug-2017 | 07:45:00, | NaN |
| 31-Aug-2017 | 08:00:00, | NaN |
| 31-Aug-2017 | 08:15:00, | NaN |
| 31-Aug-2017 | 08:30:00, | NaN |
| 31-Aug-2017 | 08:45:00, | NaN |
| 31-Aug-2017 | 09:00:00, | NaN |
| 31-Aug-2017 | 09:15:00, | NaN |
| 31-Aug-2017 | 09:30:00, | NaN |
| 31-Aug-2017 | 09:45:00, | NaN |
| 31-Aug-2017 | 10:00:00, | NaN |
| 31-Aug-2017 | 10:15:00, | NaN |
| 31-Aug-2017 | 10:30:00, | NaN |
| 31-Aug-2017 | 10:45:00, | NaN |
| 31-Aug-2017 | 11:00:00, | NaN |
| 31-Aug-2017 | 11:15:00, | NaN |
| 31-Aug-2017 | 11:30:00, | NaN |
| 31-Aug-2017 | 11:45:00, | NaN |
| 31-Aug-2017 | 12:00:00, | NaN |
| 31-Aug-2017 | 12:15:00, | NaN |
| 31-Aug-2017 | 12:30:00, | NaN |
| 31-Aug-2017 | 12:45:00, | NaN |
| 31-Aug-2017 | 13:00:00, | NaN |
| 31-Aug-2017 | 13:15:00, | NaN |
| 31-Aug-2017 | 13:30:00, | NaN |
| 31-Aug-2017 | 13:45:00, | NaN |
| 31-Aug-2017 | 14:00:00, | NaN |
| 31-Aug-2017 | 14:15:00, | NaN |
| 31-Aug-2017 | 14:30:00, | NaN |
| 31-Aug-2017 | 14:45:00, | NaN |
| 31-Aug-2017 | 15:00:00, | NaN |
| 31-Aug-2017 | 15:15:00, | NaN |
| 31-Aug-2017 | 15:30:00, | NaN |
| 31-Aug-2017 | 15:45:00, | NaN |
| 31-Aug-2017 | 16:00:00, | NaN |
| 31-Aug-2017 | 16:15:00, | NaN |
| 31-Aug-2017 | 16:30:00, | NaN |
| 31-Aug-2017 | 16:45:00, | NaN |
| 31-Aug-2017 | 17:00:00, | NaN |
| 31-Aug-2017 | 17:15:00, | NaN |
| 31-Aug-2017 | 17:30:00, | NaN |
| 31-Aug-2017 | 17:45:00, | NaN |
| 31-Aug-2017 | 18:00:00, | NaN |
| 31-Aug-2017 | 18:15:00, | NaN |
| 31-Aug-2017 | 18:30:00, | NaN |
| 31-Aug-2017 | 18:45:00, | NaN |
| 31-Aug-2017 | 19:00:00, | NaN |
| 31-Aug-2017 | 19:15:00, | NaN |
| 31-Aug-2017 | 19:30:00, | NaN |

|              |           |     |
|--------------|-----------|-----|
| 31-Aug-2017  | 19:45:00, | NaN |
| 31-Aug-2017  | 20:00:00, | NaN |
| 31-Aug-2017  | 20:15:00, | NaN |
| 31-Aug-2017  | 20:30:00, | NaN |
| 31-Aug-2017  | 20:45:00, | NaN |
| 31-Aug-2017  | 21:00:00, | NaN |
| 31-Aug-2017  | 21:15:00, | NaN |
| 31-Aug-2017  | 21:30:00, | NaN |
| 31-Aug-2017  | 21:45:00, | NaN |
| 31-Aug-2017  | 22:00:00, | NaN |
| 31-Aug-2017  | 22:15:00, | NaN |
| 31-Aug-2017  | 22:30:00, | NaN |
| 31-Aug-2017  | 22:45:00, | NaN |
| 31-Aug-2017  | 23:00:00, | NaN |
| 31-Aug-2017  | 23:15:00, | NaN |
| 31-Aug-2017  | 23:30:00, | NaN |
| 31-Aug-2017  | 23:45:00, | NaN |
| 01-Sep-2017, |           | NaN |
| 01-Sep-2017  | 00:15:00, | NaN |
| 01-Sep-2017  | 00:30:00, | NaN |
| 01-Sep-2017  | 00:45:00, | NaN |
| 01-Sep-2017  | 01:00:00, | NaN |
| 01-Sep-2017  | 01:15:00, | NaN |
| 01-Sep-2017  | 01:30:00, | NaN |
| 01-Sep-2017  | 01:45:00, | NaN |
| 01-Sep-2017  | 02:00:00, | NaN |
| 01-Sep-2017  | 02:15:00, | NaN |
| 01-Sep-2017  | 02:30:00, | NaN |
| 01-Sep-2017  | 02:45:00, | NaN |
| 01-Sep-2017  | 03:00:00, | NaN |
| 01-Sep-2017  | 03:15:00, | NaN |
| 01-Sep-2017  | 03:30:00, | NaN |
| 01-Sep-2017  | 03:45:00, | NaN |
| 01-Sep-2017  | 04:00:00, | NaN |
| 01-Sep-2017  | 04:15:00, | NaN |
| 01-Sep-2017  | 04:30:00, | NaN |
| 01-Sep-2017  | 04:45:00, | NaN |
| 01-Sep-2017  | 05:00:00, | NaN |
| 01-Sep-2017  | 05:15:00, | NaN |
| 01-Sep-2017  | 05:30:00, | NaN |
| 01-Sep-2017  | 05:45:00, | NaN |
| 01-Sep-2017  | 06:00:00, | NaN |
| 01-Sep-2017  | 06:15:00, | NaN |
| 01-Sep-2017  | 06:30:00, | NaN |
| 01-Sep-2017  | 06:45:00, | NaN |
| 01-Sep-2017  | 07:00:00, | NaN |
| 01-Sep-2017  | 07:15:00, | NaN |
| 01-Sep-2017  | 07:30:00, | NaN |
| 01-Sep-2017  | 07:45:00, | NaN |
| 01-Sep-2017  | 08:00:00, | NaN |
| 01-Sep-2017  | 08:15:00, | NaN |
| 01-Sep-2017  | 08:30:00, | NaN |
| 01-Sep-2017  | 08:45:00, | NaN |
| 01-Sep-2017  | 09:00:00, | NaN |
| 01-Sep-2017  | 09:15:00, | NaN |
| 01-Sep-2017  | 09:30:00, | NaN |
| 01-Sep-2017  | 09:45:00, | NaN |
| 01-Sep-2017  | 10:00:00, | NaN |
| 01-Sep-2017  | 10:15:00, | NaN |
| 01-Sep-2017  | 10:30:00, | NaN |
| 01-Sep-2017  | 10:45:00, | NaN |
| 01-Sep-2017  | 11:00:00, | NaN |
| 01-Sep-2017  | 11:15:00, | NaN |
| 01-Sep-2017  | 11:30:00, | NaN |

|              |           |     |
|--------------|-----------|-----|
| 01-Sep-2017  | 11:45:00, | NaN |
| 01-Sep-2017  | 12:00:00, | NaN |
| 01-Sep-2017  | 12:15:00, | NaN |
| 01-Sep-2017  | 12:30:00, | NaN |
| 01-Sep-2017  | 12:45:00, | NaN |
| 01-Sep-2017  | 13:00:00, | NaN |
| 01-Sep-2017  | 13:15:00, | NaN |
| 01-Sep-2017  | 13:30:00, | NaN |
| 01-Sep-2017  | 13:45:00, | NaN |
| 01-Sep-2017  | 14:00:00, | NaN |
| 01-Sep-2017  | 14:15:00, | NaN |
| 01-Sep-2017  | 14:30:00, | NaN |
| 01-Sep-2017  | 14:45:00, | NaN |
| 01-Sep-2017  | 15:00:00, | NaN |
| 01-Sep-2017  | 15:15:00, | NaN |
| 01-Sep-2017  | 15:30:00, | NaN |
| 01-Sep-2017  | 15:45:00, | NaN |
| 01-Sep-2017  | 16:00:00, | NaN |
| 01-Sep-2017  | 16:15:00, | NaN |
| 01-Sep-2017  | 16:30:00, | NaN |
| 01-Sep-2017  | 16:45:00, | NaN |
| 01-Sep-2017  | 17:00:00, | NaN |
| 01-Sep-2017  | 17:15:00, | NaN |
| 01-Sep-2017  | 17:30:00, | NaN |
| 01-Sep-2017  | 17:45:00, | NaN |
| 01-Sep-2017  | 18:00:00, | NaN |
| 01-Sep-2017  | 18:15:00, | NaN |
| 01-Sep-2017  | 18:30:00, | NaN |
| 01-Sep-2017  | 18:45:00, | NaN |
| 01-Sep-2017  | 19:00:00, | NaN |
| 01-Sep-2017  | 19:15:00, | NaN |
| 01-Sep-2017  | 19:30:00, | NaN |
| 01-Sep-2017  | 19:45:00, | NaN |
| 01-Sep-2017  | 20:00:00, | NaN |
| 01-Sep-2017  | 20:15:00, | NaN |
| 01-Sep-2017  | 20:30:00, | NaN |
| 01-Sep-2017  | 20:45:00, | NaN |
| 01-Sep-2017  | 21:00:00, | NaN |
| 01-Sep-2017  | 21:15:00, | NaN |
| 01-Sep-2017  | 21:30:00, | NaN |
| 01-Sep-2017  | 21:45:00, | NaN |
| 01-Sep-2017  | 22:00:00, | NaN |
| 01-Sep-2017  | 22:15:00, | NaN |
| 01-Sep-2017  | 22:30:00, | NaN |
| 01-Sep-2017  | 22:45:00, | NaN |
| 01-Sep-2017  | 23:00:00, | NaN |
| 01-Sep-2017  | 23:15:00, | NaN |
| 01-Sep-2017  | 23:30:00, | NaN |
| 01-Sep-2017  | 23:45:00, | NaN |
| 02-Sep-2017, | NaN       |     |
| 02-Sep-2017  | 00:15:00, | NaN |
| 02-Sep-2017  | 00:30:00, | NaN |
| 02-Sep-2017  | 00:45:00, | NaN |
| 02-Sep-2017  | 01:00:00, | NaN |
| 02-Sep-2017  | 01:15:00, | NaN |
| 02-Sep-2017  | 01:30:00, | NaN |
| 02-Sep-2017  | 01:45:00, | NaN |
| 02-Sep-2017  | 02:00:00, | NaN |
| 02-Sep-2017  | 02:15:00, | NaN |
| 02-Sep-2017  | 02:30:00, | NaN |
| 02-Sep-2017  | 02:45:00, | NaN |
| 02-Sep-2017  | 03:00:00, | NaN |
| 02-Sep-2017  | 03:15:00, | NaN |
| 02-Sep-2017  | 03:30:00, | NaN |

|             |           |     |
|-------------|-----------|-----|
| 02-Sep-2017 | 03:45:00, | NaN |
| 02-Sep-2017 | 04:00:00, | NaN |
| 02-Sep-2017 | 04:15:00, | NaN |
| 02-Sep-2017 | 04:30:00, | NaN |
| 02-Sep-2017 | 04:45:00, | NaN |
| 02-Sep-2017 | 05:00:00, | NaN |
| 02-Sep-2017 | 05:15:00, | NaN |
| 02-Sep-2017 | 05:30:00, | NaN |
| 02-Sep-2017 | 05:45:00, | NaN |
| 02-Sep-2017 | 06:00:00, | NaN |
| 02-Sep-2017 | 06:15:00, | NaN |
| 02-Sep-2017 | 06:30:00, | NaN |
| 02-Sep-2017 | 06:45:00, | NaN |
| 02-Sep-2017 | 07:00:00, | NaN |
| 02-Sep-2017 | 07:15:00, | NaN |
| 02-Sep-2017 | 07:30:00, | NaN |
| 02-Sep-2017 | 07:45:00, | NaN |
| 02-Sep-2017 | 08:00:00, | NaN |
| 02-Sep-2017 | 08:15:00, | NaN |
| 02-Sep-2017 | 08:30:00, | NaN |
| 02-Sep-2017 | 08:45:00, | NaN |
| 02-Sep-2017 | 09:00:00, | NaN |
| 02-Sep-2017 | 09:15:00, | NaN |
| 02-Sep-2017 | 09:30:00, | NaN |
| 02-Sep-2017 | 09:45:00, | NaN |
| 02-Sep-2017 | 10:00:00, | NaN |
| 02-Sep-2017 | 10:15:00, | NaN |
| 02-Sep-2017 | 10:30:00, | NaN |
| 02-Sep-2017 | 10:45:00, | NaN |
| 02-Sep-2017 | 11:00:00, | NaN |
| 02-Sep-2017 | 11:15:00, | NaN |
| 02-Sep-2017 | 11:30:00, | NaN |
| 02-Sep-2017 | 11:45:00, | NaN |
| 02-Sep-2017 | 12:00:00, | NaN |
| 02-Sep-2017 | 12:15:00, | NaN |
| 02-Sep-2017 | 12:30:00, | NaN |
| 02-Sep-2017 | 12:45:00, | NaN |
| 02-Sep-2017 | 13:00:00, | NaN |
| 02-Sep-2017 | 13:15:00, | NaN |
| 02-Sep-2017 | 13:30:00, | NaN |
| 02-Sep-2017 | 13:45:00, | NaN |
| 02-Sep-2017 | 14:00:00, | NaN |
| 02-Sep-2017 | 14:15:00, | NaN |
| 02-Sep-2017 | 14:30:00, | NaN |
| 02-Sep-2017 | 14:45:00, | NaN |
| 02-Sep-2017 | 15:00:00, | NaN |
| 02-Sep-2017 | 15:15:00, | NaN |
| 02-Sep-2017 | 15:30:00, | NaN |
| 02-Sep-2017 | 15:45:00, | NaN |
| 02-Sep-2017 | 16:00:00, | NaN |
| 02-Sep-2017 | 16:15:00, | NaN |
| 02-Sep-2017 | 16:30:00, | NaN |
| 02-Sep-2017 | 16:45:00, | NaN |
| 02-Sep-2017 | 17:00:00, | NaN |
| 02-Sep-2017 | 17:15:00, | NaN |
| 02-Sep-2017 | 17:30:00, | NaN |
| 02-Sep-2017 | 17:45:00, | NaN |
| 02-Sep-2017 | 18:00:00, | NaN |
| 02-Sep-2017 | 18:15:00, | NaN |
| 02-Sep-2017 | 18:30:00, | NaN |
| 02-Sep-2017 | 18:45:00, | NaN |
| 02-Sep-2017 | 19:00:00, | NaN |
| 02-Sep-2017 | 19:15:00, | NaN |
| 02-Sep-2017 | 19:30:00, | NaN |

02-Sep-2017 19:45:00, NaN  
02-Sep-2017 20:00:00, NaN  
02-Sep-2017 20:15:00, NaN  
02-Sep-2017 20:30:00, NaN  
02-Sep-2017 20:45:00, NaN  
02-Sep-2017 21:00:00, NaN  
02-Sep-2017 21:15:00, NaN  
02-Sep-2017 21:30:00, NaN  
02-Sep-2017 21:45:00, NaN  
02-Sep-2017 22:00:00, NaN  
02-Sep-2017 22:15:00, NaN  
02-Sep-2017 22:30:00, NaN  
02-Sep-2017 22:45:00, NaN  
02-Sep-2017 23:00:00, NaN  
02-Sep-2017 23:15:00, NaN  
02-Sep-2017 23:30:00, NaN  
02-Sep-2017 23:45:00, NaN  
03-Sep-2017, NaN  
03-Sep-2017 00:15:00, NaN  
03-Sep-2017 00:30:00, NaN  
03-Sep-2017 00:45:00, NaN  
03-Sep-2017 01:00:00, NaN  
03-Sep-2017 01:15:00, NaN  
03-Sep-2017 01:30:00, NaN  
03-Sep-2017 01:45:00, NaN  
03-Sep-2017 02:00:00, NaN  
03-Sep-2017 02:15:00, NaN  
03-Sep-2017 02:30:00, NaN  
03-Sep-2017 02:45:00, NaN  
03-Sep-2017 03:00:00, NaN  
03-Sep-2017 03:15:00, NaN  
03-Sep-2017 03:30:00, NaN  
03-Sep-2017 03:45:00, NaN  
03-Sep-2017 04:00:00, NaN  
03-Sep-2017 04:15:00, NaN  
03-Sep-2017 04:30:00, NaN  
03-Sep-2017 04:45:00, NaN  
03-Sep-2017 05:00:00, NaN  
03-Sep-2017 05:15:00, NaN  
03-Sep-2017 05:30:00, NaN  
03-Sep-2017 05:45:00, NaN  
03-Sep-2017 06:00:00, NaN  
03-Sep-2017 06:15:00, NaN  
03-Sep-2017 06:30:00, NaN  
03-Sep-2017 06:45:00, NaN  
03-Sep-2017 07:00:00, NaN  
03-Sep-2017 07:15:00, NaN  
03-Sep-2017 07:30:00, NaN  
03-Sep-2017 07:45:00, NaN  
03-Sep-2017 08:00:00, NaN  
03-Sep-2017 08:15:00, NaN  
03-Sep-2017 08:30:00, NaN  
03-Sep-2017 08:45:00, NaN  
03-Sep-2017 09:00:00, NaN  
03-Sep-2017 09:15:00, NaN  
03-Sep-2017 09:30:00, NaN  
03-Sep-2017 09:45:00, NaN  
03-Sep-2017 10:00:00, NaN  
03-Sep-2017 10:15:00, NaN  
03-Sep-2017 10:30:00, NaN  
03-Sep-2017 10:45:00, NaN  
03-Sep-2017 11:00:00, NaN  
03-Sep-2017 11:15:00, NaN  
03-Sep-2017 11:30:00, NaN

|              |           |     |
|--------------|-----------|-----|
| 03-Sep-2017  | 11:45:00, | NaN |
| 03-Sep-2017  | 12:00:00, | NaN |
| 03-Sep-2017  | 12:15:00, | NaN |
| 03-Sep-2017  | 12:30:00, | NaN |
| 03-Sep-2017  | 12:45:00, | NaN |
| 03-Sep-2017  | 13:00:00, | NaN |
| 03-Sep-2017  | 13:15:00, | NaN |
| 03-Sep-2017  | 13:30:00, | NaN |
| 03-Sep-2017  | 13:45:00, | NaN |
| 03-Sep-2017  | 14:00:00, | NaN |
| 03-Sep-2017  | 14:15:00, | NaN |
| 03-Sep-2017  | 14:30:00, | NaN |
| 03-Sep-2017  | 14:45:00, | NaN |
| 03-Sep-2017  | 15:00:00, | NaN |
| 03-Sep-2017  | 15:15:00, | NaN |
| 03-Sep-2017  | 15:30:00, | NaN |
| 03-Sep-2017  | 15:45:00, | NaN |
| 03-Sep-2017  | 16:00:00, | NaN |
| 03-Sep-2017  | 16:15:00, | NaN |
| 03-Sep-2017  | 16:30:00, | NaN |
| 03-Sep-2017  | 16:45:00, | NaN |
| 03-Sep-2017  | 17:00:00, | NaN |
| 03-Sep-2017  | 17:15:00, | NaN |
| 03-Sep-2017  | 17:30:00, | NaN |
| 03-Sep-2017  | 17:45:00, | NaN |
| 03-Sep-2017  | 18:00:00, | NaN |
| 03-Sep-2017  | 18:15:00, | NaN |
| 03-Sep-2017  | 18:30:00, | NaN |
| 03-Sep-2017  | 18:45:00, | NaN |
| 03-Sep-2017  | 19:00:00, | NaN |
| 03-Sep-2017  | 19:15:00, | NaN |
| 03-Sep-2017  | 19:30:00, | NaN |
| 03-Sep-2017  | 19:45:00, | NaN |
| 03-Sep-2017  | 20:00:00, | NaN |
| 03-Sep-2017  | 20:15:00, | NaN |
| 03-Sep-2017  | 20:30:00, | NaN |
| 03-Sep-2017  | 20:45:00, | NaN |
| 03-Sep-2017  | 21:00:00, | NaN |
| 03-Sep-2017  | 21:15:00, | NaN |
| 03-Sep-2017  | 21:30:00, | NaN |
| 03-Sep-2017  | 21:45:00, | NaN |
| 03-Sep-2017  | 22:00:00, | NaN |
| 03-Sep-2017  | 22:15:00, | NaN |
| 03-Sep-2017  | 22:30:00, | NaN |
| 03-Sep-2017  | 22:45:00, | NaN |
| 03-Sep-2017  | 23:00:00, | NaN |
| 03-Sep-2017  | 23:15:00, | NaN |
| 03-Sep-2017  | 23:30:00, | NaN |
| 03-Sep-2017  | 23:45:00, | NaN |
| 04-Sep-2017, | NaN       |     |
| 04-Sep-2017  | 00:15:00, | NaN |
| 04-Sep-2017  | 00:30:00, | NaN |
| 04-Sep-2017  | 00:45:00, | NaN |
| 04-Sep-2017  | 01:00:00, | NaN |
| 04-Sep-2017  | 01:15:00, | NaN |
| 04-Sep-2017  | 01:30:00, | NaN |
| 04-Sep-2017  | 01:45:00, | NaN |
| 04-Sep-2017  | 02:00:00, | NaN |
| 04-Sep-2017  | 02:15:00, | NaN |
| 04-Sep-2017  | 02:30:00, | NaN |
| 04-Sep-2017  | 02:45:00, | NaN |
| 04-Sep-2017  | 03:00:00, | NaN |
| 04-Sep-2017  | 03:15:00, | NaN |
| 04-Sep-2017  | 03:30:00, | NaN |

|             |           |     |
|-------------|-----------|-----|
| 04-Sep-2017 | 03:45:00, | NaN |
| 04-Sep-2017 | 04:00:00, | NaN |
| 04-Sep-2017 | 04:15:00, | NaN |
| 04-Sep-2017 | 04:30:00, | NaN |
| 04-Sep-2017 | 04:45:00, | NaN |
| 04-Sep-2017 | 05:00:00, | NaN |
| 04-Sep-2017 | 05:15:00, | NaN |
| 04-Sep-2017 | 05:30:00, | NaN |
| 04-Sep-2017 | 05:45:00, | NaN |
| 04-Sep-2017 | 06:00:00, | NaN |
| 04-Sep-2017 | 06:15:00, | NaN |
| 04-Sep-2017 | 06:30:00, | NaN |
| 04-Sep-2017 | 06:45:00, | NaN |
| 04-Sep-2017 | 07:00:00, | NaN |
| 04-Sep-2017 | 07:15:00, | NaN |
| 04-Sep-2017 | 07:30:00, | NaN |
| 04-Sep-2017 | 07:45:00, | NaN |
| 04-Sep-2017 | 08:00:00, | NaN |
| 04-Sep-2017 | 08:15:00, | NaN |
| 04-Sep-2017 | 08:30:00, | NaN |
| 04-Sep-2017 | 08:45:00, | NaN |
| 04-Sep-2017 | 09:00:00, | NaN |
| 04-Sep-2017 | 09:15:00, | NaN |
| 04-Sep-2017 | 09:30:00, | NaN |
| 04-Sep-2017 | 09:45:00, | NaN |
| 04-Sep-2017 | 10:00:00, | NaN |
| 04-Sep-2017 | 10:15:00, | NaN |
| 04-Sep-2017 | 10:30:00, | NaN |
| 04-Sep-2017 | 10:45:00, | NaN |
| 04-Sep-2017 | 11:00:00, | NaN |
| 04-Sep-2017 | 11:15:00, | NaN |
| 04-Sep-2017 | 11:30:00, | NaN |
| 04-Sep-2017 | 11:45:00, | NaN |
| 04-Sep-2017 | 12:00:00, | NaN |
| 04-Sep-2017 | 12:15:00, | NaN |
| 04-Sep-2017 | 12:30:00, | NaN |
| 04-Sep-2017 | 12:45:00, | NaN |
| 04-Sep-2017 | 13:00:00, | NaN |
| 04-Sep-2017 | 13:15:00, | NaN |
| 04-Sep-2017 | 13:30:00, | NaN |
| 04-Sep-2017 | 13:45:00, | NaN |
| 04-Sep-2017 | 14:00:00, | NaN |
| 04-Sep-2017 | 14:15:00, | NaN |
| 04-Sep-2017 | 14:30:00, | NaN |
| 04-Sep-2017 | 14:45:00, | NaN |
| 04-Sep-2017 | 15:00:00, | NaN |
| 04-Sep-2017 | 15:15:00, | NaN |
| 04-Sep-2017 | 15:30:00, | NaN |
| 04-Sep-2017 | 15:45:00, | NaN |
| 04-Sep-2017 | 16:00:00, | NaN |
| 04-Sep-2017 | 16:15:00, | NaN |
| 04-Sep-2017 | 16:30:00, | NaN |
| 04-Sep-2017 | 16:45:00, | NaN |
| 04-Sep-2017 | 17:00:00, | NaN |
| 04-Sep-2017 | 17:15:00, | NaN |
| 04-Sep-2017 | 17:30:00, | NaN |
| 04-Sep-2017 | 17:45:00, | NaN |
| 04-Sep-2017 | 18:00:00, | NaN |
| 04-Sep-2017 | 18:15:00, | NaN |
| 04-Sep-2017 | 18:30:00, | NaN |
| 04-Sep-2017 | 18:45:00, | NaN |
| 04-Sep-2017 | 19:00:00, | NaN |
| 04-Sep-2017 | 19:15:00, | NaN |
| 04-Sep-2017 | 19:30:00, | NaN |



04-Sep-2017 19:45:00, NaN  
04-Sep-2017 20:00:00, NaN  
04-Sep-2017 20:15:00, NaN  
04-Sep-2017 20:30:00, NaN  
04-Sep-2017 20:45:00, NaN  
04-Sep-2017 21:00:00, NaN  
04-Sep-2017 21:15:00, NaN  
04-Sep-2017 21:30:00, NaN  
04-Sep-2017 21:45:00, NaN  
04-Sep-2017 22:00:00, NaN  
04-Sep-2017 22:15:00, NaN  
04-Sep-2017 22:30:00, NaN  
04-Sep-2017 22:45:00, NaN  
04-Sep-2017 23:00:00, NaN  
04-Sep-2017 23:15:00, NaN  
04-Sep-2017 23:30:00, NaN  
04-Sep-2017 23:45:00, NaN  
05-Sep-2017, NaN  
05-Sep-2017 00:15:00, NaN  
05-Sep-2017 00:30:00, NaN  
05-Sep-2017 00:45:00, NaN  
05-Sep-2017 01:00:00, NaN  
05-Sep-2017 01:15:00, NaN  
05-Sep-2017 01:30:00, NaN  
05-Sep-2017 01:45:00, NaN  
05-Sep-2017 02:00:00, NaN  
05-Sep-2017 02:15:00, NaN  
05-Sep-2017 02:30:00, NaN  
05-Sep-2017 02:45:00, NaN  
05-Sep-2017 03:00:00, NaN  
05-Sep-2017 03:15:00, NaN  
05-Sep-2017 03:30:00, NaN  
05-Sep-2017 03:45:00, NaN  
05-Sep-2017 04:00:00, NaN  
05-Sep-2017 04:15:00, NaN  
05-Sep-2017 04:30:00, NaN  
05-Sep-2017 04:45:00, NaN  
05-Sep-2017 05:00:00, NaN  
05-Sep-2017 05:15:00, NaN  
05-Sep-2017 05:30:00, NaN  
05-Sep-2017 05:45:00, NaN  
05-Sep-2017 06:00:00, NaN  
05-Sep-2017 06:15:00, NaN  
05-Sep-2017 06:30:00, NaN  
05-Sep-2017 06:45:00, NaN  
05-Sep-2017 07:00:00, NaN  
05-Sep-2017 07:15:00, NaN  
05-Sep-2017 07:30:00, NaN  
05-Sep-2017 07:45:00, NaN  
05-Sep-2017 08:00:00, NaN  
05-Sep-2017 08:15:00, NaN  
05-Sep-2017 08:30:00, NaN  
05-Sep-2017 08:45:00, NaN  
05-Sep-2017 09:00:00, NaN  
05-Sep-2017 09:15:00, NaN  
05-Sep-2017 09:30:00, NaN  
05-Sep-2017 09:45:00, NaN  
05-Sep-2017 10:00:00, NaN  
05-Sep-2017 10:15:00, NaN  
05-Sep-2017 10:30:00, NaN  
05-Sep-2017 10:45:00, NaN  
05-Sep-2017 11:00:00, NaN  
05-Sep-2017 11:15:00, NaN  
05-Sep-2017 11:30:00, NaN

05-Sep-2017 11:45:00, NaN  
05-Sep-2017 12:00:00, NaN  
05-Sep-2017 12:15:00, NaN  
05-Sep-2017 12:30:00, NaN  
05-Sep-2017 12:45:00, NaN  
05-Sep-2017 13:00:00, NaN  
05-Sep-2017 13:15:00, NaN  
05-Sep-2017 13:30:00, NaN  
05-Sep-2017 13:45:00, NaN  
05-Sep-2017 14:00:00, NaN  
05-Sep-2017 14:15:00, NaN  
05-Sep-2017 14:30:00, NaN  
05-Sep-2017 14:45:00, NaN  
05-Sep-2017 15:00:00, NaN  
05-Sep-2017 15:15:00, NaN  
05-Sep-2017 15:30:00, NaN  
05-Sep-2017 15:45:00, NaN  
05-Sep-2017 16:00:00, NaN  
05-Sep-2017 16:15:00, NaN  
05-Sep-2017 16:30:00, NaN  
05-Sep-2017 16:45:00, NaN  
05-Sep-2017 17:00:00, NaN  
05-Sep-2017 17:15:00, NaN  
05-Sep-2017 17:30:00, NaN  
05-Sep-2017 17:45:00, NaN  
05-Sep-2017 18:00:00, NaN  
05-Sep-2017 18:15:00, NaN  
05-Sep-2017 18:30:00, NaN  
05-Sep-2017 18:45:00, NaN  
05-Sep-2017 19:00:00, NaN  
05-Sep-2017 19:15:00, NaN  
05-Sep-2017 19:30:00, NaN  
05-Sep-2017 19:45:00, NaN  
05-Sep-2017 20:00:00, NaN  
05-Sep-2017 20:15:00, NaN  
05-Sep-2017 20:30:00, NaN  
05-Sep-2017 20:45:00, NaN  
05-Sep-2017 21:00:00, NaN  
05-Sep-2017 21:15:00, NaN  
05-Sep-2017 21:30:00, NaN  
05-Sep-2017 21:45:00, NaN  
05-Sep-2017 22:00:00, NaN  
05-Sep-2017 22:15:00, NaN  
05-Sep-2017 22:30:00, NaN  
05-Sep-2017 22:45:00, NaN  
05-Sep-2017 23:00:00, NaN  
05-Sep-2017 23:15:00, NaN  
05-Sep-2017 23:30:00, NaN  
05-Sep-2017 23:45:00, NaN  
06-Sep-2017, NaN  
06-Sep-2017 00:15:00, NaN  
06-Sep-2017 00:30:00, NaN  
06-Sep-2017 00:45:00, NaN  
06-Sep-2017 01:00:00, NaN  
06-Sep-2017 01:15:00, NaN  
06-Sep-2017 01:30:00, NaN  
06-Sep-2017 01:45:00, NaN  
06-Sep-2017 02:00:00, NaN  
06-Sep-2017 02:15:00, NaN  
06-Sep-2017 02:30:00, NaN  
06-Sep-2017 02:45:00, NaN  
06-Sep-2017 03:00:00, NaN  
06-Sep-2017 03:15:00, NaN  
06-Sep-2017 03:30:00, NaN

|             |           |     |
|-------------|-----------|-----|
| 06-Sep-2017 | 03:45:00, | NaN |
| 06-Sep-2017 | 04:00:00, | NaN |
| 06-Sep-2017 | 04:15:00, | NaN |
| 06-Sep-2017 | 04:30:00, | NaN |
| 06-Sep-2017 | 04:45:00, | NaN |
| 06-Sep-2017 | 05:00:00, | NaN |
| 06-Sep-2017 | 05:15:00, | NaN |
| 06-Sep-2017 | 05:30:00, | NaN |
| 06-Sep-2017 | 05:45:00, | NaN |
| 06-Sep-2017 | 06:00:00, | NaN |
| 06-Sep-2017 | 06:15:00, | NaN |
| 06-Sep-2017 | 06:30:00, | NaN |
| 06-Sep-2017 | 06:45:00, | NaN |
| 06-Sep-2017 | 07:00:00, | NaN |
| 06-Sep-2017 | 07:15:00, | NaN |
| 06-Sep-2017 | 07:30:00, | NaN |
| 06-Sep-2017 | 07:45:00, | NaN |
| 06-Sep-2017 | 08:00:00, | NaN |
| 06-Sep-2017 | 08:15:00, | NaN |
| 06-Sep-2017 | 08:30:00, | NaN |
| 06-Sep-2017 | 08:45:00, | NaN |
| 06-Sep-2017 | 09:00:00, | NaN |
| 06-Sep-2017 | 09:15:00, | NaN |
| 06-Sep-2017 | 09:30:00, | NaN |
| 06-Sep-2017 | 09:45:00, | NaN |
| 06-Sep-2017 | 10:00:00, | NaN |
| 06-Sep-2017 | 10:15:00, | NaN |
| 06-Sep-2017 | 10:30:00, | NaN |
| 06-Sep-2017 | 10:45:00, | NaN |
| 06-Sep-2017 | 11:00:00, | NaN |
| 06-Sep-2017 | 11:15:00, | NaN |
| 06-Sep-2017 | 11:30:00, | NaN |
| 06-Sep-2017 | 11:45:00, | NaN |
| 06-Sep-2017 | 12:00:00, | NaN |
| 06-Sep-2017 | 12:15:00, | NaN |
| 06-Sep-2017 | 12:30:00, | NaN |
| 06-Sep-2017 | 12:45:00, | NaN |
| 06-Sep-2017 | 13:00:00, | NaN |
| 06-Sep-2017 | 13:15:00, | NaN |
| 06-Sep-2017 | 13:30:00, | NaN |
| 06-Sep-2017 | 13:45:00, | NaN |
| 06-Sep-2017 | 14:00:00, | NaN |
| 06-Sep-2017 | 14:15:00, | NaN |
| 06-Sep-2017 | 14:30:00, | NaN |
| 06-Sep-2017 | 14:45:00, | NaN |
| 06-Sep-2017 | 15:00:00, | NaN |
| 06-Sep-2017 | 15:15:00, | NaN |
| 06-Sep-2017 | 15:30:00, | NaN |
| 06-Sep-2017 | 15:45:00, | NaN |
| 06-Sep-2017 | 16:00:00, | NaN |
| 06-Sep-2017 | 16:15:00, | NaN |
| 06-Sep-2017 | 16:30:00, | NaN |
| 06-Sep-2017 | 16:45:00, | NaN |
| 06-Sep-2017 | 17:00:00, | NaN |
| 06-Sep-2017 | 17:15:00, | NaN |
| 06-Sep-2017 | 17:30:00, | NaN |
| 06-Sep-2017 | 17:45:00, | NaN |
| 06-Sep-2017 | 18:00:00, | NaN |
| 06-Sep-2017 | 18:15:00, | NaN |
| 06-Sep-2017 | 18:30:00, | NaN |
| 06-Sep-2017 | 18:45:00, | NaN |
| 06-Sep-2017 | 19:00:00, | NaN |
| 06-Sep-2017 | 19:15:00, | NaN |
| 06-Sep-2017 | 19:30:00, | NaN |

06-Sep-2017 19:45:00, NaN  
06-Sep-2017 20:00:00, NaN  
06-Sep-2017 20:15:00, NaN  
06-Sep-2017 20:30:00, NaN  
06-Sep-2017 20:45:00, NaN  
06-Sep-2017 21:00:00, NaN  
06-Sep-2017 21:15:00, NaN  
06-Sep-2017 21:30:00, NaN  
06-Sep-2017 21:45:00, NaN  
06-Sep-2017 22:00:00, NaN  
06-Sep-2017 22:15:00, NaN  
06-Sep-2017 22:30:00, NaN  
06-Sep-2017 22:45:00, NaN  
06-Sep-2017 23:00:00, NaN  
06-Sep-2017 23:15:00, NaN  
06-Sep-2017 23:30:00, NaN  
06-Sep-2017 23:45:00, NaN  
07-Sep-2017, NaN  
07-Sep-2017 00:15:00, NaN  
07-Sep-2017 00:30:00, NaN  
07-Sep-2017 00:45:00, NaN  
07-Sep-2017 01:00:00, NaN  
07-Sep-2017 01:15:00, NaN  
07-Sep-2017 01:30:00, NaN  
07-Sep-2017 01:45:00, NaN  
07-Sep-2017 02:00:00, NaN  
07-Sep-2017 02:15:00, NaN  
07-Sep-2017 02:30:00, NaN  
07-Sep-2017 02:45:00, NaN  
07-Sep-2017 03:00:00, NaN  
07-Sep-2017 03:15:00, NaN  
07-Sep-2017 03:30:00, NaN  
07-Sep-2017 03:45:00, NaN  
07-Sep-2017 04:00:00, NaN  
07-Sep-2017 04:15:00, NaN  
07-Sep-2017 04:30:00, NaN  
07-Sep-2017 04:45:00, NaN  
07-Sep-2017 05:00:00, NaN  
07-Sep-2017 05:15:00, NaN  
07-Sep-2017 05:30:00, NaN  
07-Sep-2017 05:45:00, NaN  
07-Sep-2017 06:00:00, NaN  
07-Sep-2017 06:15:00, NaN  
07-Sep-2017 06:30:00, NaN  
07-Sep-2017 06:45:00, NaN  
07-Sep-2017 07:00:00, NaN  
07-Sep-2017 07:15:00, NaN  
07-Sep-2017 07:30:00, NaN  
07-Sep-2017 07:45:00, NaN  
07-Sep-2017 08:00:00, NaN  
07-Sep-2017 08:15:00, NaN  
07-Sep-2017 08:30:00, NaN  
07-Sep-2017 08:45:00, NaN  
07-Sep-2017 09:00:00, NaN  
07-Sep-2017 09:15:00, NaN  
07-Sep-2017 09:30:00, NaN  
07-Sep-2017 09:45:00, NaN  
07-Sep-2017 10:00:00, NaN  
07-Sep-2017 10:15:00, NaN  
07-Sep-2017 10:30:00, NaN  
07-Sep-2017 10:45:00, NaN  
07-Sep-2017 11:00:00, NaN  
07-Sep-2017 11:15:00, NaN  
07-Sep-2017 11:30:00, NaN

07-Sep-2017 11:45:00, NaN  
07-Sep-2017 12:00:00, NaN  
07-Sep-2017 12:15:00, NaN  
07-Sep-2017 12:30:00, NaN  
07-Sep-2017 12:45:00, NaN  
07-Sep-2017 13:00:00, NaN  
07-Sep-2017 13:15:00, NaN  
07-Sep-2017 13:30:00, NaN  
07-Sep-2017 13:45:00, NaN  
07-Sep-2017 14:00:00, NaN  
07-Sep-2017 14:15:00, NaN  
07-Sep-2017 14:30:00, NaN  
07-Sep-2017 14:45:00, NaN  
07-Sep-2017 15:00:00, NaN  
07-Sep-2017 15:15:00, NaN  
07-Sep-2017 15:30:00, NaN  
07-Sep-2017 15:45:00, NaN  
07-Sep-2017 16:00:00, NaN  
07-Sep-2017 16:15:00, NaN  
07-Sep-2017 16:30:00, NaN  
07-Sep-2017 16:45:00, NaN  
07-Sep-2017 17:00:00, NaN  
07-Sep-2017 17:15:00, NaN  
07-Sep-2017 17:30:00, NaN  
07-Sep-2017 17:45:00, NaN  
07-Sep-2017 18:00:00, NaN  
07-Sep-2017 18:15:00, NaN  
07-Sep-2017 18:30:00, NaN  
07-Sep-2017 18:45:00, NaN  
07-Sep-2017 19:00:00, NaN  
07-Sep-2017 19:15:00, NaN  
07-Sep-2017 19:30:00, NaN  
07-Sep-2017 19:45:00, NaN  
07-Sep-2017 20:00:00, NaN  
07-Sep-2017 20:15:00, NaN  
07-Sep-2017 20:30:00, NaN  
07-Sep-2017 20:45:00, NaN  
07-Sep-2017 21:00:00, NaN  
07-Sep-2017 21:15:00, NaN  
07-Sep-2017 21:30:00, NaN  
07-Sep-2017 21:45:00, NaN  
07-Sep-2017 22:00:00, NaN  
07-Sep-2017 22:15:00, NaN  
07-Sep-2017 22:30:00, NaN  
07-Sep-2017 22:45:00, NaN  
07-Sep-2017 23:00:00, NaN  
07-Sep-2017 23:15:00, NaN  
07-Sep-2017 23:30:00, NaN  
07-Sep-2017 23:45:00, NaN  
08-Sep-2017, NaN  
08-Sep-2017 00:15:00, NaN  
08-Sep-2017 00:30:00, NaN  
08-Sep-2017 00:45:00, NaN  
08-Sep-2017 01:00:00, NaN  
08-Sep-2017 01:15:00, NaN  
08-Sep-2017 01:30:00, NaN  
08-Sep-2017 01:45:00, NaN  
08-Sep-2017 02:00:00, NaN  
08-Sep-2017 02:15:00, NaN  
08-Sep-2017 02:30:00, NaN  
08-Sep-2017 02:45:00, NaN  
08-Sep-2017 03:00:00, NaN  
08-Sep-2017 03:15:00, NaN  
08-Sep-2017 03:30:00, NaN

|             |           |     |
|-------------|-----------|-----|
| 08-Sep-2017 | 03:45:00, | NaN |
| 08-Sep-2017 | 04:00:00, | NaN |
| 08-Sep-2017 | 04:15:00, | NaN |
| 08-Sep-2017 | 04:30:00, | NaN |
| 08-Sep-2017 | 04:45:00, | NaN |
| 08-Sep-2017 | 05:00:00, | NaN |
| 08-Sep-2017 | 05:15:00, | NaN |
| 08-Sep-2017 | 05:30:00, | NaN |
| 08-Sep-2017 | 05:45:00, | NaN |
| 08-Sep-2017 | 06:00:00, | NaN |
| 08-Sep-2017 | 06:15:00, | NaN |
| 08-Sep-2017 | 06:30:00, | NaN |
| 08-Sep-2017 | 06:45:00, | NaN |
| 08-Sep-2017 | 07:00:00, | NaN |
| 08-Sep-2017 | 07:15:00, | NaN |
| 08-Sep-2017 | 07:30:00, | NaN |
| 08-Sep-2017 | 07:45:00, | NaN |
| 08-Sep-2017 | 08:00:00, | NaN |
| 08-Sep-2017 | 08:15:00, | NaN |
| 08-Sep-2017 | 08:30:00, | NaN |
| 08-Sep-2017 | 08:45:00, | NaN |
| 08-Sep-2017 | 09:00:00, | NaN |
| 08-Sep-2017 | 09:15:00, | NaN |
| 08-Sep-2017 | 09:30:00, | NaN |
| 08-Sep-2017 | 09:45:00, | NaN |
| 08-Sep-2017 | 10:00:00, | NaN |
| 08-Sep-2017 | 10:15:00, | NaN |
| 08-Sep-2017 | 10:30:00, | NaN |
| 08-Sep-2017 | 10:45:00, | NaN |
| 08-Sep-2017 | 11:00:00, | NaN |
| 08-Sep-2017 | 11:15:00, | NaN |
| 08-Sep-2017 | 11:30:00, | NaN |
| 08-Sep-2017 | 11:45:00, | NaN |
| 08-Sep-2017 | 12:00:00, | NaN |
| 08-Sep-2017 | 12:15:00, | NaN |
| 08-Sep-2017 | 12:30:00, | NaN |
| 08-Sep-2017 | 12:45:00, | NaN |
| 08-Sep-2017 | 13:00:00, | NaN |
| 08-Sep-2017 | 13:15:00, | NaN |
| 08-Sep-2017 | 13:30:00, | NaN |
| 08-Sep-2017 | 13:45:00, | NaN |
| 08-Sep-2017 | 14:00:00, | NaN |
| 08-Sep-2017 | 14:15:00, | NaN |
| 08-Sep-2017 | 14:30:00, | NaN |
| 08-Sep-2017 | 14:45:00, | NaN |
| 08-Sep-2017 | 15:00:00, | NaN |
| 08-Sep-2017 | 15:15:00, | NaN |
| 08-Sep-2017 | 15:30:00, | NaN |
| 08-Sep-2017 | 15:45:00, | NaN |
| 08-Sep-2017 | 16:00:00, | NaN |
| 08-Sep-2017 | 16:15:00, | NaN |
| 08-Sep-2017 | 16:30:00, | NaN |
| 08-Sep-2017 | 16:45:00, | NaN |
| 08-Sep-2017 | 17:00:00, | NaN |
| 08-Sep-2017 | 17:15:00, | NaN |
| 08-Sep-2017 | 17:30:00, | NaN |
| 08-Sep-2017 | 17:45:00, | NaN |
| 08-Sep-2017 | 18:00:00, | NaN |
| 08-Sep-2017 | 18:15:00, | NaN |
| 08-Sep-2017 | 18:30:00, | NaN |
| 08-Sep-2017 | 18:45:00, | NaN |
| 08-Sep-2017 | 19:00:00, | NaN |
| 08-Sep-2017 | 19:15:00, | NaN |
| 08-Sep-2017 | 19:30:00, | NaN |

08-Sep-2017 19:45:00, NaN  
08-Sep-2017 20:00:00, NaN  
08-Sep-2017 20:15:00, NaN  
08-Sep-2017 20:30:00, NaN  
08-Sep-2017 20:45:00, NaN  
08-Sep-2017 21:00:00, NaN  
08-Sep-2017 21:15:00, NaN  
08-Sep-2017 21:30:00, NaN  
08-Sep-2017 21:45:00, NaN  
08-Sep-2017 22:00:00, NaN  
08-Sep-2017 22:15:00, NaN  
08-Sep-2017 22:30:00, NaN  
08-Sep-2017 22:45:00, NaN  
08-Sep-2017 23:00:00, NaN  
08-Sep-2017 23:15:00, NaN  
08-Sep-2017 23:30:00, NaN  
08-Sep-2017 23:45:00, NaN  
09-Sep-2017, NaN  
09-Sep-2017 00:15:00, NaN  
09-Sep-2017 00:30:00, NaN  
09-Sep-2017 00:45:00, NaN  
09-Sep-2017 01:00:00, NaN  
09-Sep-2017 01:15:00, NaN  
09-Sep-2017 01:30:00, NaN  
09-Sep-2017 01:45:00, NaN  
09-Sep-2017 02:00:00, NaN  
09-Sep-2017 02:15:00, NaN  
09-Sep-2017 02:30:00, NaN  
09-Sep-2017 02:45:00, NaN  
09-Sep-2017 03:00:00, NaN  
09-Sep-2017 03:15:00, NaN  
09-Sep-2017 03:30:00, NaN  
09-Sep-2017 03:45:00, NaN  
09-Sep-2017 04:00:00, NaN  
09-Sep-2017 04:15:00, NaN  
09-Sep-2017 04:30:00, NaN  
09-Sep-2017 04:45:00, NaN  
09-Sep-2017 05:00:00, NaN  
09-Sep-2017 05:15:00, NaN  
09-Sep-2017 05:30:00, NaN  
09-Sep-2017 05:45:00, NaN  
09-Sep-2017 06:00:00, NaN  
09-Sep-2017 06:15:00, NaN  
09-Sep-2017 06:30:00, NaN  
09-Sep-2017 06:45:00, NaN  
09-Sep-2017 07:00:00, NaN  
09-Sep-2017 07:15:00, NaN  
09-Sep-2017 07:30:00, NaN  
09-Sep-2017 07:45:00, NaN  
09-Sep-2017 08:00:00, NaN  
09-Sep-2017 08:15:00, NaN  
09-Sep-2017 08:30:00, NaN  
09-Sep-2017 08:45:00, NaN  
09-Sep-2017 09:00:00, NaN  
09-Sep-2017 09:15:00, NaN  
09-Sep-2017 09:30:00, NaN  
09-Sep-2017 09:45:00, NaN  
09-Sep-2017 10:00:00, NaN  
09-Sep-2017 10:15:00, NaN  
09-Sep-2017 10:30:00, NaN  
09-Sep-2017 10:45:00, NaN  
09-Sep-2017 11:00:00, NaN  
09-Sep-2017 11:15:00, NaN  
09-Sep-2017 11:30:00, NaN

09-Sep-2017 11:45:00, NaN  
09-Sep-2017 12:00:00, NaN  
09-Sep-2017 12:15:00, NaN  
09-Sep-2017 12:30:00, NaN  
09-Sep-2017 12:45:00, NaN  
09-Sep-2017 13:00:00, NaN  
09-Sep-2017 13:15:00, NaN  
09-Sep-2017 13:30:00, NaN  
09-Sep-2017 13:45:00, NaN  
09-Sep-2017 14:00:00, NaN  
09-Sep-2017 14:15:00, NaN  
09-Sep-2017 14:30:00, NaN  
09-Sep-2017 14:45:00, NaN  
09-Sep-2017 15:00:00, NaN  
09-Sep-2017 15:15:00, NaN  
09-Sep-2017 15:30:00, NaN  
09-Sep-2017 15:45:00, NaN  
09-Sep-2017 16:00:00, NaN  
09-Sep-2017 16:15:00, NaN  
09-Sep-2017 16:30:00, NaN  
09-Sep-2017 16:45:00, NaN  
09-Sep-2017 17:00:00, NaN  
09-Sep-2017 17:15:00, NaN  
09-Sep-2017 17:30:00, NaN  
09-Sep-2017 17:45:00, NaN  
09-Sep-2017 18:00:00, NaN  
09-Sep-2017 18:15:00, NaN  
09-Sep-2017 18:30:00, NaN  
09-Sep-2017 18:45:00, NaN  
09-Sep-2017 19:00:00, NaN  
09-Sep-2017 19:15:00, NaN  
09-Sep-2017 19:30:00, NaN  
09-Sep-2017 19:45:00, NaN  
09-Sep-2017 20:00:00, NaN  
09-Sep-2017 20:15:00, NaN  
09-Sep-2017 20:30:00, NaN  
09-Sep-2017 20:45:00, NaN  
09-Sep-2017 21:00:00, NaN  
09-Sep-2017 21:15:00, NaN  
09-Sep-2017 21:30:00, NaN  
09-Sep-2017 21:45:00, NaN  
09-Sep-2017 22:00:00, NaN  
09-Sep-2017 22:15:00, NaN  
09-Sep-2017 22:30:00, NaN  
09-Sep-2017 22:45:00, NaN  
09-Sep-2017 23:00:00, NaN  
09-Sep-2017 23:15:00, NaN  
09-Sep-2017 23:30:00, NaN  
09-Sep-2017 23:45:00, NaN  
10-Sep-2017, NaN  
10-Sep-2017 00:15:00, NaN  
10-Sep-2017 00:30:00, NaN  
10-Sep-2017 00:45:00, NaN  
10-Sep-2017 01:00:00, NaN  
10-Sep-2017 01:15:00, NaN  
10-Sep-2017 01:30:00, NaN  
10-Sep-2017 01:45:00, NaN  
10-Sep-2017 02:00:00, NaN  
10-Sep-2017 02:15:00, NaN  
10-Sep-2017 02:30:00, NaN  
10-Sep-2017 02:45:00, NaN  
10-Sep-2017 03:00:00, NaN  
10-Sep-2017 03:15:00, NaN  
10-Sep-2017 03:30:00, NaN



|             |           |     |
|-------------|-----------|-----|
| 10-Sep-2017 | 03:45:00, | NaN |
| 10-Sep-2017 | 04:00:00, | NaN |
| 10-Sep-2017 | 04:15:00, | NaN |
| 10-Sep-2017 | 04:30:00, | NaN |
| 10-Sep-2017 | 04:45:00, | NaN |
| 10-Sep-2017 | 05:00:00, | NaN |
| 10-Sep-2017 | 05:15:00, | NaN |
| 10-Sep-2017 | 05:30:00, | NaN |
| 10-Sep-2017 | 05:45:00, | NaN |
| 10-Sep-2017 | 06:00:00, | NaN |
| 10-Sep-2017 | 06:15:00, | NaN |
| 10-Sep-2017 | 06:30:00, | NaN |
| 10-Sep-2017 | 06:45:00, | NaN |
| 10-Sep-2017 | 07:00:00, | NaN |
| 10-Sep-2017 | 07:15:00, | NaN |
| 10-Sep-2017 | 07:30:00, | NaN |
| 10-Sep-2017 | 07:45:00, | NaN |
| 10-Sep-2017 | 08:00:00, | NaN |
| 10-Sep-2017 | 08:15:00, | NaN |
| 10-Sep-2017 | 08:30:00, | NaN |
| 10-Sep-2017 | 08:45:00, | NaN |
| 10-Sep-2017 | 09:00:00, | NaN |
| 10-Sep-2017 | 09:15:00, | NaN |
| 10-Sep-2017 | 09:30:00, | NaN |
| 10-Sep-2017 | 09:45:00, | NaN |
| 10-Sep-2017 | 10:00:00, | NaN |
| 10-Sep-2017 | 10:15:00, | NaN |
| 10-Sep-2017 | 10:30:00, | NaN |
| 10-Sep-2017 | 10:45:00, | NaN |
| 10-Sep-2017 | 11:00:00, | NaN |
| 10-Sep-2017 | 11:15:00, | NaN |
| 10-Sep-2017 | 11:30:00, | NaN |
| 10-Sep-2017 | 11:45:00, | NaN |
| 10-Sep-2017 | 12:00:00, | NaN |
| 10-Sep-2017 | 12:15:00, | NaN |
| 10-Sep-2017 | 12:30:00, | NaN |
| 10-Sep-2017 | 12:45:00, | NaN |
| 10-Sep-2017 | 13:00:00, | NaN |
| 10-Sep-2017 | 13:15:00, | NaN |
| 10-Sep-2017 | 13:30:00, | NaN |
| 10-Sep-2017 | 13:45:00, | NaN |
| 10-Sep-2017 | 14:00:00, | NaN |
| 10-Sep-2017 | 14:15:00, | NaN |
| 10-Sep-2017 | 14:30:00, | NaN |
| 10-Sep-2017 | 14:45:00, | NaN |
| 10-Sep-2017 | 15:00:00, | NaN |
| 10-Sep-2017 | 15:15:00, | NaN |
| 10-Sep-2017 | 15:30:00, | NaN |
| 10-Sep-2017 | 15:45:00, | NaN |
| 10-Sep-2017 | 16:00:00, | NaN |
| 10-Sep-2017 | 16:15:00, | NaN |
| 10-Sep-2017 | 16:30:00, | NaN |
| 10-Sep-2017 | 16:45:00, | NaN |
| 10-Sep-2017 | 17:00:00, | NaN |
| 10-Sep-2017 | 17:15:00, | NaN |
| 10-Sep-2017 | 17:30:00, | NaN |
| 10-Sep-2017 | 17:45:00, | NaN |
| 10-Sep-2017 | 18:00:00, | NaN |
| 10-Sep-2017 | 18:15:00, | NaN |
| 10-Sep-2017 | 18:30:00, | NaN |
| 10-Sep-2017 | 18:45:00, | NaN |
| 10-Sep-2017 | 19:00:00, | NaN |
| 10-Sep-2017 | 19:15:00, | NaN |
| 10-Sep-2017 | 19:30:00, | NaN |

|              |           |     |
|--------------|-----------|-----|
| 10-Sep-2017  | 19:45:00, | NaN |
| 10-Sep-2017  | 20:00:00, | NaN |
| 10-Sep-2017  | 20:15:00, | NaN |
| 10-Sep-2017  | 20:30:00, | NaN |
| 10-Sep-2017  | 20:45:00, | NaN |
| 10-Sep-2017  | 21:00:00, | NaN |
| 10-Sep-2017  | 21:15:00, | NaN |
| 10-Sep-2017  | 21:30:00, | NaN |
| 10-Sep-2017  | 21:45:00, | NaN |
| 10-Sep-2017  | 22:00:00, | NaN |
| 10-Sep-2017  | 22:15:00, | NaN |
| 10-Sep-2017  | 22:30:00, | NaN |
| 10-Sep-2017  | 22:45:00, | NaN |
| 10-Sep-2017  | 23:00:00, | NaN |
| 10-Sep-2017  | 23:15:00, | NaN |
| 10-Sep-2017  | 23:30:00, | NaN |
| 10-Sep-2017  | 23:45:00, | NaN |
| 11-Sep-2017, |           | NaN |
| 11-Sep-2017  | 00:15:00, | NaN |
| 11-Sep-2017  | 00:30:00, | NaN |
| 11-Sep-2017  | 00:45:00, | NaN |
| 11-Sep-2017  | 01:00:00, | NaN |
| 11-Sep-2017  | 01:15:00, | NaN |
| 11-Sep-2017  | 01:30:00, | NaN |
| 11-Sep-2017  | 01:45:00, | NaN |
| 11-Sep-2017  | 02:00:00, | NaN |
| 11-Sep-2017  | 02:15:00, | NaN |
| 11-Sep-2017  | 02:30:00, | NaN |
| 11-Sep-2017  | 02:45:00, | NaN |
| 11-Sep-2017  | 03:00:00, | NaN |
| 11-Sep-2017  | 03:15:00, | NaN |
| 11-Sep-2017  | 03:30:00, | NaN |
| 11-Sep-2017  | 03:45:00, | NaN |
| 11-Sep-2017  | 04:00:00, | NaN |
| 11-Sep-2017  | 04:15:00, | NaN |
| 11-Sep-2017  | 04:30:00, | NaN |
| 11-Sep-2017  | 04:45:00, | NaN |
| 11-Sep-2017  | 05:00:00, | NaN |
| 11-Sep-2017  | 05:15:00, | NaN |
| 11-Sep-2017  | 05:30:00, | NaN |
| 11-Sep-2017  | 05:45:00, | NaN |
| 11-Sep-2017  | 06:00:00, | NaN |
| 11-Sep-2017  | 06:15:00, | NaN |
| 11-Sep-2017  | 06:30:00, | NaN |
| 11-Sep-2017  | 06:45:00, | NaN |
| 11-Sep-2017  | 07:00:00, | NaN |
| 11-Sep-2017  | 07:15:00, | NaN |
| 11-Sep-2017  | 07:30:00, | NaN |
| 11-Sep-2017  | 07:45:00, | NaN |
| 11-Sep-2017  | 08:00:00, | NaN |
| 11-Sep-2017  | 08:15:00, | NaN |
| 11-Sep-2017  | 08:30:00, | NaN |
| 11-Sep-2017  | 08:45:00, | NaN |
| 11-Sep-2017  | 09:00:00, | NaN |
| 11-Sep-2017  | 09:15:00, | NaN |
| 11-Sep-2017  | 09:30:00, | NaN |
| 11-Sep-2017  | 09:45:00, | NaN |
| 11-Sep-2017  | 10:00:00, | NaN |
| 11-Sep-2017  | 10:15:00, | NaN |
| 11-Sep-2017  | 10:30:00, | NaN |
| 11-Sep-2017  | 10:45:00, | NaN |
| 11-Sep-2017  | 11:00:00, | NaN |
| 11-Sep-2017  | 11:15:00, | NaN |
| 11-Sep-2017  | 11:30:00, | NaN |

|              |           |     |
|--------------|-----------|-----|
| 11-Sep-2017  | 11:45:00, | NaN |
| 11-Sep-2017  | 12:00:00, | NaN |
| 11-Sep-2017  | 12:15:00, | NaN |
| 11-Sep-2017  | 12:30:00, | NaN |
| 11-Sep-2017  | 12:45:00, | NaN |
| 11-Sep-2017  | 13:00:00, | NaN |
| 11-Sep-2017  | 13:15:00, | NaN |
| 11-Sep-2017  | 13:30:00, | NaN |
| 11-Sep-2017  | 13:45:00, | NaN |
| 11-Sep-2017  | 14:00:00, | NaN |
| 11-Sep-2017  | 14:15:00, | NaN |
| 11-Sep-2017  | 14:30:00, | NaN |
| 11-Sep-2017  | 14:45:00, | NaN |
| 11-Sep-2017  | 15:00:00, | NaN |
| 11-Sep-2017  | 15:15:00, | NaN |
| 11-Sep-2017  | 15:30:00, | NaN |
| 11-Sep-2017  | 15:45:00, | NaN |
| 11-Sep-2017  | 16:00:00, | NaN |
| 11-Sep-2017  | 16:15:00, | NaN |
| 11-Sep-2017  | 16:30:00, | NaN |
| 11-Sep-2017  | 16:45:00, | NaN |
| 11-Sep-2017  | 17:00:00, | NaN |
| 11-Sep-2017  | 17:15:00, | NaN |
| 11-Sep-2017  | 17:30:00, | NaN |
| 11-Sep-2017  | 17:45:00, | NaN |
| 11-Sep-2017  | 18:00:00, | NaN |
| 11-Sep-2017  | 18:15:00, | NaN |
| 11-Sep-2017  | 18:30:00, | NaN |
| 11-Sep-2017  | 18:45:00, | NaN |
| 11-Sep-2017  | 19:00:00, | NaN |
| 11-Sep-2017  | 19:15:00, | NaN |
| 11-Sep-2017  | 19:30:00, | NaN |
| 11-Sep-2017  | 19:45:00, | NaN |
| 11-Sep-2017  | 20:00:00, | NaN |
| 11-Sep-2017  | 20:15:00, | NaN |
| 11-Sep-2017  | 20:30:00, | NaN |
| 11-Sep-2017  | 20:45:00, | NaN |
| 11-Sep-2017  | 21:00:00, | NaN |
| 11-Sep-2017  | 21:15:00, | NaN |
| 11-Sep-2017  | 21:30:00, | NaN |
| 11-Sep-2017  | 21:45:00, | NaN |
| 11-Sep-2017  | 22:00:00, | NaN |
| 11-Sep-2017  | 22:15:00, | NaN |
| 11-Sep-2017  | 22:30:00, | NaN |
| 11-Sep-2017  | 22:45:00, | NaN |
| 11-Sep-2017  | 23:00:00, | NaN |
| 11-Sep-2017  | 23:15:00, | NaN |
| 11-Sep-2017  | 23:30:00, | NaN |
| 11-Sep-2017  | 23:45:00, | NaN |
| 12-Sep-2017, | NaN       |     |
| 12-Sep-2017  | 00:15:00, | NaN |
| 12-Sep-2017  | 00:30:00, | NaN |
| 12-Sep-2017  | 00:45:00, | NaN |
| 12-Sep-2017  | 01:00:00, | NaN |
| 12-Sep-2017  | 01:15:00, | NaN |
| 12-Sep-2017  | 01:30:00, | NaN |
| 12-Sep-2017  | 01:45:00, | NaN |
| 12-Sep-2017  | 02:00:00, | NaN |
| 12-Sep-2017  | 02:15:00, | NaN |
| 12-Sep-2017  | 02:30:00, | NaN |
| 12-Sep-2017  | 02:45:00, | NaN |
| 12-Sep-2017  | 03:00:00, | NaN |
| 12-Sep-2017  | 03:15:00, | NaN |
| 12-Sep-2017  | 03:30:00, | NaN |

|             |           |     |
|-------------|-----------|-----|
| 12-Sep-2017 | 03:45:00, | NaN |
| 12-Sep-2017 | 04:00:00, | NaN |
| 12-Sep-2017 | 04:15:00, | NaN |
| 12-Sep-2017 | 04:30:00, | NaN |
| 12-Sep-2017 | 04:45:00, | NaN |
| 12-Sep-2017 | 05:00:00, | NaN |
| 12-Sep-2017 | 05:15:00, | NaN |
| 12-Sep-2017 | 05:30:00, | NaN |
| 12-Sep-2017 | 05:45:00, | NaN |
| 12-Sep-2017 | 06:00:00, | NaN |
| 12-Sep-2017 | 06:15:00, | NaN |
| 12-Sep-2017 | 06:30:00, | NaN |
| 12-Sep-2017 | 06:45:00, | NaN |
| 12-Sep-2017 | 07:00:00, | NaN |
| 12-Sep-2017 | 07:15:00, | NaN |
| 12-Sep-2017 | 07:30:00, | NaN |
| 12-Sep-2017 | 07:45:00, | NaN |
| 12-Sep-2017 | 08:00:00, | NaN |
| 12-Sep-2017 | 08:15:00, | NaN |
| 12-Sep-2017 | 08:30:00, | NaN |
| 12-Sep-2017 | 08:45:00, | NaN |
| 12-Sep-2017 | 09:00:00, | NaN |
| 12-Sep-2017 | 09:15:00, | NaN |
| 12-Sep-2017 | 09:30:00, | NaN |
| 12-Sep-2017 | 09:45:00, | NaN |
| 12-Sep-2017 | 10:00:00, | NaN |
| 12-Sep-2017 | 10:15:00, | NaN |
| 12-Sep-2017 | 10:30:00, | NaN |
| 12-Sep-2017 | 10:45:00, | NaN |
| 12-Sep-2017 | 11:00:00, | NaN |
| 12-Sep-2017 | 11:15:00, | NaN |
| 12-Sep-2017 | 11:30:00, | NaN |
| 12-Sep-2017 | 11:45:00, | NaN |
| 12-Sep-2017 | 12:00:00, | NaN |
| 12-Sep-2017 | 12:15:00, | NaN |
| 12-Sep-2017 | 12:30:00, | NaN |
| 12-Sep-2017 | 12:45:00, | NaN |
| 12-Sep-2017 | 13:00:00, | NaN |
| 12-Sep-2017 | 13:15:00, | NaN |
| 12-Sep-2017 | 13:30:00, | NaN |
| 12-Sep-2017 | 13:45:00, | NaN |
| 12-Sep-2017 | 14:00:00, | NaN |
| 12-Sep-2017 | 14:15:00, | NaN |
| 12-Sep-2017 | 14:30:00, | NaN |
| 12-Sep-2017 | 14:45:00, | NaN |
| 12-Sep-2017 | 15:00:00, | NaN |
| 12-Sep-2017 | 15:15:00, | NaN |
| 12-Sep-2017 | 15:30:00, | NaN |
| 12-Sep-2017 | 15:45:00, | NaN |
| 12-Sep-2017 | 16:00:00, | NaN |
| 12-Sep-2017 | 16:15:00, | NaN |
| 12-Sep-2017 | 16:30:00, | NaN |
| 12-Sep-2017 | 16:45:00, | NaN |
| 12-Sep-2017 | 17:00:00, | NaN |
| 12-Sep-2017 | 17:15:00, | NaN |
| 12-Sep-2017 | 17:30:00, | NaN |
| 12-Sep-2017 | 17:45:00, | NaN |
| 12-Sep-2017 | 18:00:00, | NaN |
| 12-Sep-2017 | 18:15:00, | NaN |
| 12-Sep-2017 | 18:30:00, | NaN |
| 12-Sep-2017 | 18:45:00, | NaN |
| 12-Sep-2017 | 19:00:00, | NaN |
| 12-Sep-2017 | 19:15:00, | NaN |
| 12-Sep-2017 | 19:30:00, | NaN |

|              |           |     |
|--------------|-----------|-----|
| 12-Sep-2017  | 19:45:00, | NaN |
| 12-Sep-2017  | 20:00:00, | NaN |
| 12-Sep-2017  | 20:15:00, | NaN |
| 12-Sep-2017  | 20:30:00, | NaN |
| 12-Sep-2017  | 20:45:00, | NaN |
| 12-Sep-2017  | 21:00:00, | NaN |
| 12-Sep-2017  | 21:15:00, | NaN |
| 12-Sep-2017  | 21:30:00, | NaN |
| 12-Sep-2017  | 21:45:00, | NaN |
| 12-Sep-2017  | 22:00:00, | NaN |
| 12-Sep-2017  | 22:15:00, | NaN |
| 12-Sep-2017  | 22:30:00, | NaN |
| 12-Sep-2017  | 22:45:00, | NaN |
| 12-Sep-2017  | 23:00:00, | NaN |
| 12-Sep-2017  | 23:15:00, | NaN |
| 12-Sep-2017  | 23:30:00, | NaN |
| 12-Sep-2017  | 23:45:00, | NaN |
| 13-Sep-2017, |           | NaN |
| 13-Sep-2017  | 00:15:00, | NaN |
| 13-Sep-2017  | 00:30:00, | NaN |
| 13-Sep-2017  | 00:45:00, | NaN |
| 13-Sep-2017  | 01:00:00, | NaN |
| 13-Sep-2017  | 01:15:00, | NaN |
| 13-Sep-2017  | 01:30:00, | NaN |
| 13-Sep-2017  | 01:45:00, | NaN |
| 13-Sep-2017  | 02:00:00, | NaN |
| 13-Sep-2017  | 02:15:00, | NaN |
| 13-Sep-2017  | 02:30:00, | NaN |
| 13-Sep-2017  | 02:45:00, | NaN |
| 13-Sep-2017  | 03:00:00, | NaN |
| 13-Sep-2017  | 03:15:00, | NaN |
| 13-Sep-2017  | 03:30:00, | NaN |
| 13-Sep-2017  | 03:45:00, | NaN |
| 13-Sep-2017  | 04:00:00, | NaN |
| 13-Sep-2017  | 04:15:00, | NaN |
| 13-Sep-2017  | 04:30:00, | NaN |
| 13-Sep-2017  | 04:45:00, | NaN |
| 13-Sep-2017  | 05:00:00, | NaN |
| 13-Sep-2017  | 05:15:00, | NaN |
| 13-Sep-2017  | 05:30:00, | NaN |
| 13-Sep-2017  | 05:45:00, | NaN |
| 13-Sep-2017  | 06:00:00, | NaN |
| 13-Sep-2017  | 06:15:00, | NaN |
| 13-Sep-2017  | 06:30:00, | NaN |
| 13-Sep-2017  | 06:45:00, | NaN |
| 13-Sep-2017  | 07:00:00, | NaN |
| 13-Sep-2017  | 07:15:00, | NaN |
| 13-Sep-2017  | 07:30:00, | NaN |
| 13-Sep-2017  | 07:45:00, | NaN |
| 13-Sep-2017  | 08:00:00, | NaN |
| 13-Sep-2017  | 08:15:00, | NaN |
| 13-Sep-2017  | 08:30:00, | NaN |
| 13-Sep-2017  | 08:45:00, | NaN |
| 13-Sep-2017  | 09:00:00, | NaN |
| 13-Sep-2017  | 09:15:00, | NaN |
| 13-Sep-2017  | 09:30:00, | NaN |
| 13-Sep-2017  | 09:45:00, | NaN |
| 13-Sep-2017  | 10:00:00, | NaN |
| 13-Sep-2017  | 10:15:00, | NaN |
| 13-Sep-2017  | 10:30:00, | NaN |
| 13-Sep-2017  | 10:45:00, | NaN |
| 13-Sep-2017  | 11:00:00, | NaN |
| 13-Sep-2017  | 11:15:00, | NaN |
| 13-Sep-2017  | 11:30:00, | NaN |

|              |           |     |
|--------------|-----------|-----|
| 13-Sep-2017  | 11:45:00, | NaN |
| 13-Sep-2017  | 12:00:00, | NaN |
| 13-Sep-2017  | 12:15:00, | NaN |
| 13-Sep-2017  | 12:30:00, | NaN |
| 13-Sep-2017  | 12:45:00, | NaN |
| 13-Sep-2017  | 13:00:00, | NaN |
| 13-Sep-2017  | 13:15:00, | NaN |
| 13-Sep-2017  | 13:30:00, | NaN |
| 13-Sep-2017  | 13:45:00, | NaN |
| 13-Sep-2017  | 14:00:00, | NaN |
| 13-Sep-2017  | 14:15:00, | NaN |
| 13-Sep-2017  | 14:30:00, | NaN |
| 13-Sep-2017  | 14:45:00, | NaN |
| 13-Sep-2017  | 15:00:00, | NaN |
| 13-Sep-2017  | 15:15:00, | NaN |
| 13-Sep-2017  | 15:30:00, | NaN |
| 13-Sep-2017  | 15:45:00, | NaN |
| 13-Sep-2017  | 16:00:00, | NaN |
| 13-Sep-2017  | 16:15:00, | NaN |
| 13-Sep-2017  | 16:30:00, | NaN |
| 13-Sep-2017  | 16:45:00, | NaN |
| 13-Sep-2017  | 17:00:00, | NaN |
| 13-Sep-2017  | 17:15:00, | NaN |
| 13-Sep-2017  | 17:30:00, | NaN |
| 13-Sep-2017  | 17:45:00, | NaN |
| 13-Sep-2017  | 18:00:00, | NaN |
| 13-Sep-2017  | 18:15:00, | NaN |
| 13-Sep-2017  | 18:30:00, | NaN |
| 13-Sep-2017  | 18:45:00, | NaN |
| 13-Sep-2017  | 19:00:00, | NaN |
| 13-Sep-2017  | 19:15:00, | NaN |
| 13-Sep-2017  | 19:30:00, | NaN |
| 13-Sep-2017  | 19:45:00, | NaN |
| 13-Sep-2017  | 20:00:00, | NaN |
| 13-Sep-2017  | 20:15:00, | NaN |
| 13-Sep-2017  | 20:30:00, | NaN |
| 13-Sep-2017  | 20:45:00, | NaN |
| 13-Sep-2017  | 21:00:00, | NaN |
| 13-Sep-2017  | 21:15:00, | NaN |
| 13-Sep-2017  | 21:30:00, | NaN |
| 13-Sep-2017  | 21:45:00, | NaN |
| 13-Sep-2017  | 22:00:00, | NaN |
| 13-Sep-2017  | 22:15:00, | NaN |
| 13-Sep-2017  | 22:30:00, | NaN |
| 13-Sep-2017  | 22:45:00, | NaN |
| 13-Sep-2017  | 23:00:00, | NaN |
| 13-Sep-2017  | 23:15:00, | NaN |
| 13-Sep-2017  | 23:30:00, | NaN |
| 13-Sep-2017  | 23:45:00, | NaN |
| 14-Sep-2017, | NaN       |     |
| 14-Sep-2017  | 00:15:00, | NaN |
| 14-Sep-2017  | 00:30:00, | NaN |
| 14-Sep-2017  | 00:45:00, | NaN |
| 14-Sep-2017  | 01:00:00, | NaN |
| 14-Sep-2017  | 01:15:00, | NaN |
| 14-Sep-2017  | 01:30:00, | NaN |
| 14-Sep-2017  | 01:45:00, | NaN |
| 14-Sep-2017  | 02:00:00, | NaN |
| 14-Sep-2017  | 02:15:00, | NaN |
| 14-Sep-2017  | 02:30:00, | NaN |
| 14-Sep-2017  | 02:45:00, | NaN |
| 14-Sep-2017  | 03:00:00, | NaN |
| 14-Sep-2017  | 03:15:00, | NaN |
| 14-Sep-2017  | 03:30:00, | NaN |

|             |           |     |
|-------------|-----------|-----|
| 14-Sep-2017 | 03:45:00, | NaN |
| 14-Sep-2017 | 04:00:00, | NaN |
| 14-Sep-2017 | 04:15:00, | NaN |
| 14-Sep-2017 | 04:30:00, | NaN |
| 14-Sep-2017 | 04:45:00, | NaN |
| 14-Sep-2017 | 05:00:00, | NaN |
| 14-Sep-2017 | 05:15:00, | NaN |
| 14-Sep-2017 | 05:30:00, | NaN |
| 14-Sep-2017 | 05:45:00, | NaN |
| 14-Sep-2017 | 06:00:00, | NaN |
| 14-Sep-2017 | 06:15:00, | NaN |
| 14-Sep-2017 | 06:30:00, | NaN |
| 14-Sep-2017 | 06:45:00, | NaN |
| 14-Sep-2017 | 07:00:00, | NaN |
| 14-Sep-2017 | 07:15:00, | NaN |
| 14-Sep-2017 | 07:30:00, | NaN |
| 14-Sep-2017 | 07:45:00, | NaN |
| 14-Sep-2017 | 08:00:00, | NaN |
| 14-Sep-2017 | 08:15:00, | NaN |
| 14-Sep-2017 | 08:30:00, | NaN |
| 14-Sep-2017 | 08:45:00, | NaN |
| 14-Sep-2017 | 09:00:00, | NaN |
| 14-Sep-2017 | 09:15:00, | NaN |
| 14-Sep-2017 | 09:30:00, | NaN |
| 14-Sep-2017 | 09:45:00, | NaN |
| 14-Sep-2017 | 10:00:00, | NaN |
| 14-Sep-2017 | 10:15:00, | NaN |
| 14-Sep-2017 | 10:30:00, | NaN |
| 14-Sep-2017 | 10:45:00, | NaN |
| 14-Sep-2017 | 11:00:00, | NaN |
| 14-Sep-2017 | 11:15:00, | NaN |
| 14-Sep-2017 | 11:30:00, | NaN |
| 14-Sep-2017 | 11:45:00, | NaN |
| 14-Sep-2017 | 12:00:00, | NaN |
| 14-Sep-2017 | 12:15:00, | NaN |
| 14-Sep-2017 | 12:30:00, | NaN |
| 14-Sep-2017 | 12:45:00, | NaN |
| 14-Sep-2017 | 13:00:00, | NaN |
| 14-Sep-2017 | 13:15:00, | NaN |
| 14-Sep-2017 | 13:30:00, | NaN |
| 14-Sep-2017 | 13:45:00, | NaN |
| 14-Sep-2017 | 14:00:00, | NaN |
| 14-Sep-2017 | 14:15:00, | NaN |
| 14-Sep-2017 | 14:30:00, | NaN |
| 14-Sep-2017 | 14:45:00, | NaN |
| 14-Sep-2017 | 15:00:00, | NaN |
| 14-Sep-2017 | 15:15:00, | NaN |
| 14-Sep-2017 | 15:30:00, | NaN |
| 14-Sep-2017 | 15:45:00, | NaN |
| 14-Sep-2017 | 16:00:00, | NaN |
| 14-Sep-2017 | 16:15:00, | NaN |
| 14-Sep-2017 | 16:30:00, | NaN |
| 14-Sep-2017 | 16:45:00, | NaN |
| 14-Sep-2017 | 17:00:00, | NaN |
| 14-Sep-2017 | 17:15:00, | NaN |
| 14-Sep-2017 | 17:30:00, | NaN |
| 14-Sep-2017 | 17:45:00, | NaN |
| 14-Sep-2017 | 18:00:00, | NaN |
| 14-Sep-2017 | 18:15:00, | NaN |
| 14-Sep-2017 | 18:30:00, | NaN |
| 14-Sep-2017 | 18:45:00, | NaN |
| 14-Sep-2017 | 19:00:00, | NaN |
| 14-Sep-2017 | 19:15:00, | NaN |
| 14-Sep-2017 | 19:30:00, | NaN |

|              |           |     |
|--------------|-----------|-----|
| 14-Sep-2017  | 19:45:00, | NaN |
| 14-Sep-2017  | 20:00:00, | NaN |
| 14-Sep-2017  | 20:15:00, | NaN |
| 14-Sep-2017  | 20:30:00, | NaN |
| 14-Sep-2017  | 20:45:00, | NaN |
| 14-Sep-2017  | 21:00:00, | NaN |
| 14-Sep-2017  | 21:15:00, | NaN |
| 14-Sep-2017  | 21:30:00, | NaN |
| 14-Sep-2017  | 21:45:00, | NaN |
| 14-Sep-2017  | 22:00:00, | NaN |
| 14-Sep-2017  | 22:15:00, | NaN |
| 14-Sep-2017  | 22:30:00, | NaN |
| 14-Sep-2017  | 22:45:00, | NaN |
| 14-Sep-2017  | 23:00:00, | NaN |
| 14-Sep-2017  | 23:15:00, | NaN |
| 14-Sep-2017  | 23:30:00, | NaN |
| 14-Sep-2017  | 23:45:00, | NaN |
| 15-Sep-2017, |           | NaN |
| 15-Sep-2017  | 00:15:00, | NaN |
| 15-Sep-2017  | 00:30:00, | NaN |
| 15-Sep-2017  | 00:45:00, | NaN |
| 15-Sep-2017  | 01:00:00, | NaN |
| 15-Sep-2017  | 01:15:00, | NaN |
| 15-Sep-2017  | 01:30:00, | NaN |
| 15-Sep-2017  | 01:45:00, | NaN |
| 15-Sep-2017  | 02:00:00, | NaN |
| 15-Sep-2017  | 02:15:00, | NaN |
| 15-Sep-2017  | 02:30:00, | NaN |
| 15-Sep-2017  | 02:45:00, | NaN |
| 15-Sep-2017  | 03:00:00, | NaN |
| 15-Sep-2017  | 03:15:00, | NaN |
| 15-Sep-2017  | 03:30:00, | NaN |
| 15-Sep-2017  | 03:45:00, | NaN |
| 15-Sep-2017  | 04:00:00, | NaN |
| 15-Sep-2017  | 04:15:00, | NaN |
| 15-Sep-2017  | 04:30:00, | NaN |
| 15-Sep-2017  | 04:45:00, | NaN |
| 15-Sep-2017  | 05:00:00, | NaN |
| 15-Sep-2017  | 05:15:00, | NaN |
| 15-Sep-2017  | 05:30:00, | NaN |
| 15-Sep-2017  | 05:45:00, | NaN |
| 15-Sep-2017  | 06:00:00, | NaN |
| 15-Sep-2017  | 06:15:00, | NaN |
| 15-Sep-2017  | 06:30:00, | NaN |
| 15-Sep-2017  | 06:45:00, | NaN |
| 15-Sep-2017  | 07:00:00, | NaN |
| 15-Sep-2017  | 07:15:00, | NaN |
| 15-Sep-2017  | 07:30:00, | NaN |
| 15-Sep-2017  | 07:45:00, | NaN |
| 15-Sep-2017  | 08:00:00, | NaN |
| 15-Sep-2017  | 08:15:00, | NaN |
| 15-Sep-2017  | 08:30:00, | NaN |
| 15-Sep-2017  | 08:45:00, | NaN |
| 15-Sep-2017  | 09:00:00, | NaN |
| 15-Sep-2017  | 09:15:00, | NaN |
| 15-Sep-2017  | 09:30:00, | NaN |
| 15-Sep-2017  | 09:45:00, | NaN |
| 15-Sep-2017  | 10:00:00, | NaN |
| 15-Sep-2017  | 10:15:00, | NaN |
| 15-Sep-2017  | 10:30:00, | NaN |
| 15-Sep-2017  | 10:45:00, | NaN |
| 15-Sep-2017  | 11:00:00, | NaN |
| 15-Sep-2017  | 11:15:00, | NaN |
| 15-Sep-2017  | 11:30:00, | NaN |



|              |           |     |
|--------------|-----------|-----|
| 15-Sep-2017  | 11:45:00, | NaN |
| 15-Sep-2017  | 12:00:00, | NaN |
| 15-Sep-2017  | 12:15:00, | NaN |
| 15-Sep-2017  | 12:30:00, | NaN |
| 15-Sep-2017  | 12:45:00, | NaN |
| 15-Sep-2017  | 13:00:00, | NaN |
| 15-Sep-2017  | 13:15:00, | NaN |
| 15-Sep-2017  | 13:30:00, | NaN |
| 15-Sep-2017  | 13:45:00, | NaN |
| 15-Sep-2017  | 14:00:00, | NaN |
| 15-Sep-2017  | 14:15:00, | NaN |
| 15-Sep-2017  | 14:30:00, | NaN |
| 15-Sep-2017  | 14:45:00, | NaN |
| 15-Sep-2017  | 15:00:00, | NaN |
| 15-Sep-2017  | 15:15:00, | NaN |
| 15-Sep-2017  | 15:30:00, | NaN |
| 15-Sep-2017  | 15:45:00, | NaN |
| 15-Sep-2017  | 16:00:00, | NaN |
| 15-Sep-2017  | 16:15:00, | NaN |
| 15-Sep-2017  | 16:30:00, | NaN |
| 15-Sep-2017  | 16:45:00, | NaN |
| 15-Sep-2017  | 17:00:00, | NaN |
| 15-Sep-2017  | 17:15:00, | NaN |
| 15-Sep-2017  | 17:30:00, | NaN |
| 15-Sep-2017  | 17:45:00, | NaN |
| 15-Sep-2017  | 18:00:00, | NaN |
| 15-Sep-2017  | 18:15:00, | NaN |
| 15-Sep-2017  | 18:30:00, | NaN |
| 15-Sep-2017  | 18:45:00, | NaN |
| 15-Sep-2017  | 19:00:00, | NaN |
| 15-Sep-2017  | 19:15:00, | NaN |
| 15-Sep-2017  | 19:30:00, | NaN |
| 15-Sep-2017  | 19:45:00, | NaN |
| 15-Sep-2017  | 20:00:00, | NaN |
| 15-Sep-2017  | 20:15:00, | NaN |
| 15-Sep-2017  | 20:30:00, | NaN |
| 15-Sep-2017  | 20:45:00, | NaN |
| 15-Sep-2017  | 21:00:00, | NaN |
| 15-Sep-2017  | 21:15:00, | NaN |
| 15-Sep-2017  | 21:30:00, | NaN |
| 15-Sep-2017  | 21:45:00, | NaN |
| 15-Sep-2017  | 22:00:00, | NaN |
| 15-Sep-2017  | 22:15:00, | NaN |
| 15-Sep-2017  | 22:30:00, | NaN |
| 15-Sep-2017  | 22:45:00, | NaN |
| 15-Sep-2017  | 23:00:00, | NaN |
| 15-Sep-2017  | 23:15:00, | NaN |
| 15-Sep-2017  | 23:30:00, | NaN |
| 15-Sep-2017  | 23:45:00, | NaN |
| 16-Sep-2017, | NaN       |     |
| 16-Sep-2017  | 00:15:00, | NaN |
| 16-Sep-2017  | 00:30:00, | NaN |
| 16-Sep-2017  | 00:45:00, | NaN |
| 16-Sep-2017  | 01:00:00, | NaN |
| 16-Sep-2017  | 01:15:00, | NaN |
| 16-Sep-2017  | 01:30:00, | NaN |
| 16-Sep-2017  | 01:45:00, | NaN |
| 16-Sep-2017  | 02:00:00, | NaN |
| 16-Sep-2017  | 02:15:00, | NaN |
| 16-Sep-2017  | 02:30:00, | NaN |
| 16-Sep-2017  | 02:45:00, | NaN |
| 16-Sep-2017  | 03:00:00, | NaN |
| 16-Sep-2017  | 03:15:00, | NaN |
| 16-Sep-2017  | 03:30:00, | NaN |

|             |           |     |
|-------------|-----------|-----|
| 16-Sep-2017 | 03:45:00, | NaN |
| 16-Sep-2017 | 04:00:00, | NaN |
| 16-Sep-2017 | 04:15:00, | NaN |
| 16-Sep-2017 | 04:30:00, | NaN |
| 16-Sep-2017 | 04:45:00, | NaN |
| 16-Sep-2017 | 05:00:00, | NaN |
| 16-Sep-2017 | 05:15:00, | NaN |
| 16-Sep-2017 | 05:30:00, | NaN |
| 16-Sep-2017 | 05:45:00, | NaN |
| 16-Sep-2017 | 06:00:00, | NaN |
| 16-Sep-2017 | 06:15:00, | NaN |
| 16-Sep-2017 | 06:30:00, | NaN |
| 16-Sep-2017 | 06:45:00, | NaN |
| 16-Sep-2017 | 07:00:00, | NaN |
| 16-Sep-2017 | 07:15:00, | NaN |
| 16-Sep-2017 | 07:30:00, | NaN |
| 16-Sep-2017 | 07:45:00, | NaN |
| 16-Sep-2017 | 08:00:00, | NaN |
| 16-Sep-2017 | 08:15:00, | NaN |
| 16-Sep-2017 | 08:30:00, | NaN |
| 16-Sep-2017 | 08:45:00, | NaN |
| 16-Sep-2017 | 09:00:00, | NaN |
| 16-Sep-2017 | 09:15:00, | NaN |
| 16-Sep-2017 | 09:30:00, | NaN |
| 16-Sep-2017 | 09:45:00, | NaN |
| 16-Sep-2017 | 10:00:00, | NaN |
| 16-Sep-2017 | 10:15:00, | NaN |
| 16-Sep-2017 | 10:30:00, | NaN |
| 16-Sep-2017 | 10:45:00, | NaN |
| 16-Sep-2017 | 11:00:00, | NaN |
| 16-Sep-2017 | 11:15:00, | NaN |
| 16-Sep-2017 | 11:30:00, | NaN |
| 16-Sep-2017 | 11:45:00, | NaN |
| 16-Sep-2017 | 12:00:00, | NaN |
| 16-Sep-2017 | 12:15:00, | NaN |
| 16-Sep-2017 | 12:30:00, | NaN |
| 16-Sep-2017 | 12:45:00, | NaN |
| 16-Sep-2017 | 13:00:00, | NaN |
| 16-Sep-2017 | 13:15:00, | NaN |
| 16-Sep-2017 | 13:30:00, | NaN |
| 16-Sep-2017 | 13:45:00, | NaN |
| 16-Sep-2017 | 14:00:00, | NaN |
| 16-Sep-2017 | 14:15:00, | NaN |
| 16-Sep-2017 | 14:30:00, | NaN |
| 16-Sep-2017 | 14:45:00, | NaN |
| 16-Sep-2017 | 15:00:00, | NaN |
| 16-Sep-2017 | 15:15:00, | NaN |
| 16-Sep-2017 | 15:30:00, | NaN |
| 16-Sep-2017 | 15:45:00, | NaN |
| 16-Sep-2017 | 16:00:00, | NaN |
| 16-Sep-2017 | 16:15:00, | NaN |
| 16-Sep-2017 | 16:30:00, | NaN |
| 16-Sep-2017 | 16:45:00, | NaN |
| 16-Sep-2017 | 17:00:00, | NaN |
| 16-Sep-2017 | 17:15:00, | NaN |
| 16-Sep-2017 | 17:30:00, | NaN |
| 16-Sep-2017 | 17:45:00, | NaN |
| 16-Sep-2017 | 18:00:00, | NaN |
| 16-Sep-2017 | 18:15:00, | NaN |
| 16-Sep-2017 | 18:30:00, | NaN |
| 16-Sep-2017 | 18:45:00, | NaN |
| 16-Sep-2017 | 19:00:00, | NaN |
| 16-Sep-2017 | 19:15:00, | NaN |
| 16-Sep-2017 | 19:30:00, | NaN |

|              |           |     |
|--------------|-----------|-----|
| 16-Sep-2017  | 19:45:00, | NaN |
| 16-Sep-2017  | 20:00:00, | NaN |
| 16-Sep-2017  | 20:15:00, | NaN |
| 16-Sep-2017  | 20:30:00, | NaN |
| 16-Sep-2017  | 20:45:00, | NaN |
| 16-Sep-2017  | 21:00:00, | NaN |
| 16-Sep-2017  | 21:15:00, | NaN |
| 16-Sep-2017  | 21:30:00, | NaN |
| 16-Sep-2017  | 21:45:00, | NaN |
| 16-Sep-2017  | 22:00:00, | NaN |
| 16-Sep-2017  | 22:15:00, | NaN |
| 16-Sep-2017  | 22:30:00, | NaN |
| 16-Sep-2017  | 22:45:00, | NaN |
| 16-Sep-2017  | 23:00:00, | NaN |
| 16-Sep-2017  | 23:15:00, | NaN |
| 16-Sep-2017  | 23:30:00, | NaN |
| 16-Sep-2017  | 23:45:00, | NaN |
| 17-Sep-2017, |           | NaN |
| 17-Sep-2017  | 00:15:00, | NaN |
| 17-Sep-2017  | 00:30:00, | NaN |
| 17-Sep-2017  | 00:45:00, | NaN |
| 17-Sep-2017  | 01:00:00, | NaN |
| 17-Sep-2017  | 01:15:00, | NaN |
| 17-Sep-2017  | 01:30:00, | NaN |
| 17-Sep-2017  | 01:45:00, | NaN |
| 17-Sep-2017  | 02:00:00, | NaN |
| 17-Sep-2017  | 02:15:00, | NaN |
| 17-Sep-2017  | 02:30:00, | NaN |
| 17-Sep-2017  | 02:45:00, | NaN |
| 17-Sep-2017  | 03:00:00, | NaN |
| 17-Sep-2017  | 03:15:00, | NaN |
| 17-Sep-2017  | 03:30:00, | NaN |
| 17-Sep-2017  | 03:45:00, | NaN |
| 17-Sep-2017  | 04:00:00, | NaN |
| 17-Sep-2017  | 04:15:00, | NaN |
| 17-Sep-2017  | 04:30:00, | NaN |
| 17-Sep-2017  | 04:45:00, | NaN |
| 17-Sep-2017  | 05:00:00, | NaN |
| 17-Sep-2017  | 05:15:00, | NaN |
| 17-Sep-2017  | 05:30:00, | NaN |
| 17-Sep-2017  | 05:45:00, | NaN |
| 17-Sep-2017  | 06:00:00, | NaN |
| 17-Sep-2017  | 06:15:00, | NaN |
| 17-Sep-2017  | 06:30:00, | NaN |
| 17-Sep-2017  | 06:45:00, | NaN |
| 17-Sep-2017  | 07:00:00, | NaN |
| 17-Sep-2017  | 07:15:00, | NaN |
| 17-Sep-2017  | 07:30:00, | NaN |
| 17-Sep-2017  | 07:45:00, | NaN |
| 17-Sep-2017  | 08:00:00, | NaN |
| 17-Sep-2017  | 08:15:00, | NaN |
| 17-Sep-2017  | 08:30:00, | NaN |
| 17-Sep-2017  | 08:45:00, | NaN |
| 17-Sep-2017  | 09:00:00, | NaN |
| 17-Sep-2017  | 09:15:00, | NaN |
| 17-Sep-2017  | 09:30:00, | NaN |
| 17-Sep-2017  | 09:45:00, | NaN |
| 17-Sep-2017  | 10:00:00, | NaN |
| 17-Sep-2017  | 10:15:00, | NaN |
| 17-Sep-2017  | 10:30:00, | NaN |
| 17-Sep-2017  | 10:45:00, | NaN |
| 17-Sep-2017  | 11:00:00, | NaN |
| 17-Sep-2017  | 11:15:00, | NaN |
| 17-Sep-2017  | 11:30:00, | NaN |

|              |           |     |
|--------------|-----------|-----|
| 17-Sep-2017  | 11:45:00, | NaN |
| 17-Sep-2017  | 12:00:00, | NaN |
| 17-Sep-2017  | 12:15:00, | NaN |
| 17-Sep-2017  | 12:30:00, | NaN |
| 17-Sep-2017  | 12:45:00, | NaN |
| 17-Sep-2017  | 13:00:00, | NaN |
| 17-Sep-2017  | 13:15:00, | NaN |
| 17-Sep-2017  | 13:30:00, | NaN |
| 17-Sep-2017  | 13:45:00, | NaN |
| 17-Sep-2017  | 14:00:00, | NaN |
| 17-Sep-2017  | 14:15:00, | NaN |
| 17-Sep-2017  | 14:30:00, | NaN |
| 17-Sep-2017  | 14:45:00, | NaN |
| 17-Sep-2017  | 15:00:00, | NaN |
| 17-Sep-2017  | 15:15:00, | NaN |
| 17-Sep-2017  | 15:30:00, | NaN |
| 17-Sep-2017  | 15:45:00, | NaN |
| 17-Sep-2017  | 16:00:00, | NaN |
| 17-Sep-2017  | 16:15:00, | NaN |
| 17-Sep-2017  | 16:30:00, | NaN |
| 17-Sep-2017  | 16:45:00, | NaN |
| 17-Sep-2017  | 17:00:00, | NaN |
| 17-Sep-2017  | 17:15:00, | NaN |
| 17-Sep-2017  | 17:30:00, | NaN |
| 17-Sep-2017  | 17:45:00, | NaN |
| 17-Sep-2017  | 18:00:00, | NaN |
| 17-Sep-2017  | 18:15:00, | NaN |
| 17-Sep-2017  | 18:30:00, | NaN |
| 17-Sep-2017  | 18:45:00, | NaN |
| 17-Sep-2017  | 19:00:00, | NaN |
| 17-Sep-2017  | 19:15:00, | NaN |
| 17-Sep-2017  | 19:30:00, | NaN |
| 17-Sep-2017  | 19:45:00, | NaN |
| 17-Sep-2017  | 20:00:00, | NaN |
| 17-Sep-2017  | 20:15:00, | NaN |
| 17-Sep-2017  | 20:30:00, | NaN |
| 17-Sep-2017  | 20:45:00, | NaN |
| 17-Sep-2017  | 21:00:00, | NaN |
| 17-Sep-2017  | 21:15:00, | NaN |
| 17-Sep-2017  | 21:30:00, | NaN |
| 17-Sep-2017  | 21:45:00, | NaN |
| 17-Sep-2017  | 22:00:00, | NaN |
| 17-Sep-2017  | 22:15:00, | NaN |
| 17-Sep-2017  | 22:30:00, | NaN |
| 17-Sep-2017  | 22:45:00, | NaN |
| 17-Sep-2017  | 23:00:00, | NaN |
| 17-Sep-2017  | 23:15:00, | NaN |
| 17-Sep-2017  | 23:30:00, | NaN |
| 17-Sep-2017  | 23:45:00, | NaN |
| 18-Sep-2017, | NaN       |     |
| 18-Sep-2017  | 00:15:00, | NaN |
| 18-Sep-2017  | 00:30:00, | NaN |
| 18-Sep-2017  | 00:45:00, | NaN |
| 18-Sep-2017  | 01:00:00, | NaN |
| 18-Sep-2017  | 01:15:00, | NaN |
| 18-Sep-2017  | 01:30:00, | NaN |
| 18-Sep-2017  | 01:45:00, | NaN |
| 18-Sep-2017  | 02:00:00, | NaN |
| 18-Sep-2017  | 02:15:00, | NaN |
| 18-Sep-2017  | 02:30:00, | NaN |
| 18-Sep-2017  | 02:45:00, | NaN |
| 18-Sep-2017  | 03:00:00, | NaN |
| 18-Sep-2017  | 03:15:00, | NaN |
| 18-Sep-2017  | 03:30:00, | NaN |

|             |           |     |
|-------------|-----------|-----|
| 18-Sep-2017 | 03:45:00, | NaN |
| 18-Sep-2017 | 04:00:00, | NaN |
| 18-Sep-2017 | 04:15:00, | NaN |
| 18-Sep-2017 | 04:30:00, | NaN |
| 18-Sep-2017 | 04:45:00, | NaN |
| 18-Sep-2017 | 05:00:00, | NaN |
| 18-Sep-2017 | 05:15:00, | NaN |
| 18-Sep-2017 | 05:30:00, | NaN |
| 18-Sep-2017 | 05:45:00, | NaN |
| 18-Sep-2017 | 06:00:00, | NaN |
| 18-Sep-2017 | 06:15:00, | NaN |
| 18-Sep-2017 | 06:30:00, | NaN |
| 18-Sep-2017 | 06:45:00, | NaN |
| 18-Sep-2017 | 07:00:00, | NaN |
| 18-Sep-2017 | 07:15:00, | NaN |
| 18-Sep-2017 | 07:30:00, | NaN |
| 18-Sep-2017 | 07:45:00, | NaN |
| 18-Sep-2017 | 08:00:00, | NaN |
| 18-Sep-2017 | 08:15:00, | NaN |
| 18-Sep-2017 | 08:30:00, | NaN |
| 18-Sep-2017 | 08:45:00, | NaN |
| 18-Sep-2017 | 09:00:00, | NaN |
| 18-Sep-2017 | 09:15:00, | NaN |
| 18-Sep-2017 | 09:30:00, | NaN |
| 18-Sep-2017 | 09:45:00, | NaN |
| 18-Sep-2017 | 10:00:00, | NaN |
| 18-Sep-2017 | 10:15:00, | NaN |
| 18-Sep-2017 | 10:30:00, | NaN |
| 18-Sep-2017 | 10:45:00, | NaN |
| 18-Sep-2017 | 11:00:00, | NaN |
| 18-Sep-2017 | 11:15:00, | NaN |
| 18-Sep-2017 | 11:30:00, | NaN |
| 18-Sep-2017 | 11:45:00, | NaN |
| 18-Sep-2017 | 12:00:00, | NaN |
| 18-Sep-2017 | 12:15:00, | NaN |
| 18-Sep-2017 | 12:30:00, | NaN |
| 18-Sep-2017 | 12:45:00, | NaN |
| 18-Sep-2017 | 13:00:00, | NaN |
| 18-Sep-2017 | 13:15:00, | NaN |
| 18-Sep-2017 | 13:30:00, | NaN |
| 18-Sep-2017 | 13:45:00, | NaN |
| 18-Sep-2017 | 14:00:00, | NaN |
| 18-Sep-2017 | 14:15:00, | NaN |
| 18-Sep-2017 | 14:30:00, | NaN |
| 18-Sep-2017 | 14:45:00, | NaN |
| 18-Sep-2017 | 15:00:00, | NaN |
| 18-Sep-2017 | 15:15:00, | NaN |
| 18-Sep-2017 | 15:30:00, | NaN |
| 18-Sep-2017 | 15:45:00, | NaN |
| 18-Sep-2017 | 16:00:00, | NaN |
| 18-Sep-2017 | 16:15:00, | NaN |
| 18-Sep-2017 | 16:30:00, | NaN |
| 18-Sep-2017 | 16:45:00, | NaN |
| 18-Sep-2017 | 17:00:00, | NaN |
| 18-Sep-2017 | 17:15:00, | NaN |
| 18-Sep-2017 | 17:30:00, | NaN |
| 18-Sep-2017 | 17:45:00, | NaN |
| 18-Sep-2017 | 18:00:00, | NaN |
| 18-Sep-2017 | 18:15:00, | NaN |
| 18-Sep-2017 | 18:30:00, | NaN |
| 18-Sep-2017 | 18:45:00, | NaN |
| 18-Sep-2017 | 19:00:00, | NaN |
| 18-Sep-2017 | 19:15:00, | NaN |
| 18-Sep-2017 | 19:30:00, | NaN |

|              |           |     |
|--------------|-----------|-----|
| 18-Sep-2017  | 19:45:00, | NaN |
| 18-Sep-2017  | 20:00:00, | NaN |
| 18-Sep-2017  | 20:15:00, | NaN |
| 18-Sep-2017  | 20:30:00, | NaN |
| 18-Sep-2017  | 20:45:00, | NaN |
| 18-Sep-2017  | 21:00:00, | NaN |
| 18-Sep-2017  | 21:15:00, | NaN |
| 18-Sep-2017  | 21:30:00, | NaN |
| 18-Sep-2017  | 21:45:00, | NaN |
| 18-Sep-2017  | 22:00:00, | NaN |
| 18-Sep-2017  | 22:15:00, | NaN |
| 18-Sep-2017  | 22:30:00, | NaN |
| 18-Sep-2017  | 22:45:00, | NaN |
| 18-Sep-2017  | 23:00:00, | NaN |
| 18-Sep-2017  | 23:15:00, | NaN |
| 18-Sep-2017  | 23:30:00, | NaN |
| 18-Sep-2017  | 23:45:00, | NaN |
| 19-Sep-2017, |           | NaN |
| 19-Sep-2017  | 00:15:00, | NaN |
| 19-Sep-2017  | 00:30:00, | NaN |
| 19-Sep-2017  | 00:45:00, | NaN |
| 19-Sep-2017  | 01:00:00, | NaN |
| 19-Sep-2017  | 01:15:00, | NaN |
| 19-Sep-2017  | 01:30:00, | NaN |
| 19-Sep-2017  | 01:45:00, | NaN |
| 19-Sep-2017  | 02:00:00, | NaN |
| 19-Sep-2017  | 02:15:00, | NaN |
| 19-Sep-2017  | 02:30:00, | NaN |
| 19-Sep-2017  | 02:45:00, | NaN |
| 19-Sep-2017  | 03:00:00, | NaN |
| 19-Sep-2017  | 03:15:00, | NaN |
| 19-Sep-2017  | 03:30:00, | NaN |
| 19-Sep-2017  | 03:45:00, | NaN |
| 19-Sep-2017  | 04:00:00, | NaN |
| 19-Sep-2017  | 04:15:00, | NaN |
| 19-Sep-2017  | 04:30:00, | NaN |
| 19-Sep-2017  | 04:45:00, | NaN |
| 19-Sep-2017  | 05:00:00, | NaN |
| 19-Sep-2017  | 05:15:00, | NaN |
| 19-Sep-2017  | 05:30:00, | NaN |
| 19-Sep-2017  | 05:45:00, | NaN |
| 19-Sep-2017  | 06:00:00, | NaN |
| 19-Sep-2017  | 06:15:00, | NaN |
| 19-Sep-2017  | 06:30:00, | NaN |
| 19-Sep-2017  | 06:45:00, | NaN |
| 19-Sep-2017  | 07:00:00, | NaN |
| 19-Sep-2017  | 07:15:00, | NaN |
| 19-Sep-2017  | 07:30:00, | NaN |
| 19-Sep-2017  | 07:45:00, | NaN |
| 19-Sep-2017  | 08:00:00, | NaN |
| 19-Sep-2017  | 08:15:00, | NaN |
| 19-Sep-2017  | 08:30:00, | NaN |
| 19-Sep-2017  | 08:45:00, | NaN |
| 19-Sep-2017  | 09:00:00, | NaN |
| 19-Sep-2017  | 09:15:00, | NaN |
| 19-Sep-2017  | 09:30:00, | NaN |
| 19-Sep-2017  | 09:45:00, | NaN |
| 19-Sep-2017  | 10:00:00, | NaN |
| 19-Sep-2017  | 10:15:00, | NaN |
| 19-Sep-2017  | 10:30:00, | NaN |
| 19-Sep-2017  | 10:45:00, | NaN |
| 19-Sep-2017  | 11:00:00, | NaN |
| 19-Sep-2017  | 11:15:00, | NaN |
| 19-Sep-2017  | 11:30:00, | NaN |

|              |           |     |
|--------------|-----------|-----|
| 19-Sep-2017  | 11:45:00, | NaN |
| 19-Sep-2017  | 12:00:00, | NaN |
| 19-Sep-2017  | 12:15:00, | NaN |
| 19-Sep-2017  | 12:30:00, | NaN |
| 19-Sep-2017  | 12:45:00, | NaN |
| 19-Sep-2017  | 13:00:00, | NaN |
| 19-Sep-2017  | 13:15:00, | NaN |
| 19-Sep-2017  | 13:30:00, | NaN |
| 19-Sep-2017  | 13:45:00, | NaN |
| 19-Sep-2017  | 14:00:00, | NaN |
| 19-Sep-2017  | 14:15:00, | NaN |
| 19-Sep-2017  | 14:30:00, | NaN |
| 19-Sep-2017  | 14:45:00, | NaN |
| 19-Sep-2017  | 15:00:00, | NaN |
| 19-Sep-2017  | 15:15:00, | NaN |
| 19-Sep-2017  | 15:30:00, | NaN |
| 19-Sep-2017  | 15:45:00, | NaN |
| 19-Sep-2017  | 16:00:00, | NaN |
| 19-Sep-2017  | 16:15:00, | NaN |
| 19-Sep-2017  | 16:30:00, | NaN |
| 19-Sep-2017  | 16:45:00, | NaN |
| 19-Sep-2017  | 17:00:00, | NaN |
| 19-Sep-2017  | 17:15:00, | NaN |
| 19-Sep-2017  | 17:30:00, | NaN |
| 19-Sep-2017  | 17:45:00, | NaN |
| 19-Sep-2017  | 18:00:00, | NaN |
| 19-Sep-2017  | 18:15:00, | NaN |
| 19-Sep-2017  | 18:30:00, | NaN |
| 19-Sep-2017  | 18:45:00, | NaN |
| 19-Sep-2017  | 19:00:00, | NaN |
| 19-Sep-2017  | 19:15:00, | NaN |
| 19-Sep-2017  | 19:30:00, | NaN |
| 19-Sep-2017  | 19:45:00, | NaN |
| 19-Sep-2017  | 20:00:00, | NaN |
| 19-Sep-2017  | 20:15:00, | NaN |
| 19-Sep-2017  | 20:30:00, | NaN |
| 19-Sep-2017  | 20:45:00, | NaN |
| 19-Sep-2017  | 21:00:00, | NaN |
| 19-Sep-2017  | 21:15:00, | NaN |
| 19-Sep-2017  | 21:30:00, | NaN |
| 19-Sep-2017  | 21:45:00, | NaN |
| 19-Sep-2017  | 22:00:00, | NaN |
| 19-Sep-2017  | 22:15:00, | NaN |
| 19-Sep-2017  | 22:30:00, | NaN |
| 19-Sep-2017  | 22:45:00, | NaN |
| 19-Sep-2017  | 23:00:00, | NaN |
| 19-Sep-2017  | 23:15:00, | NaN |
| 19-Sep-2017  | 23:30:00, | NaN |
| 19-Sep-2017  | 23:45:00, | NaN |
| 20-Sep-2017, | NaN       |     |
| 20-Sep-2017  | 00:15:00, | NaN |
| 20-Sep-2017  | 00:30:00, | NaN |
| 20-Sep-2017  | 00:45:00, | NaN |
| 20-Sep-2017  | 01:00:00, | NaN |
| 20-Sep-2017  | 01:15:00, | NaN |
| 20-Sep-2017  | 01:30:00, | NaN |
| 20-Sep-2017  | 01:45:00, | NaN |
| 20-Sep-2017  | 02:00:00, | NaN |
| 20-Sep-2017  | 02:15:00, | NaN |
| 20-Sep-2017  | 02:30:00, | NaN |
| 20-Sep-2017  | 02:45:00, | NaN |
| 20-Sep-2017  | 03:00:00, | NaN |
| 20-Sep-2017  | 03:15:00, | NaN |
| 20-Sep-2017  | 03:30:00, | NaN |

|             |           |     |
|-------------|-----------|-----|
| 20-Sep-2017 | 03:45:00, | NaN |
| 20-Sep-2017 | 04:00:00, | NaN |
| 20-Sep-2017 | 04:15:00, | NaN |
| 20-Sep-2017 | 04:30:00, | NaN |
| 20-Sep-2017 | 04:45:00, | NaN |
| 20-Sep-2017 | 05:00:00, | NaN |
| 20-Sep-2017 | 05:15:00, | NaN |
| 20-Sep-2017 | 05:30:00, | NaN |
| 20-Sep-2017 | 05:45:00, | NaN |
| 20-Sep-2017 | 06:00:00, | NaN |
| 20-Sep-2017 | 06:15:00, | NaN |
| 20-Sep-2017 | 06:30:00, | NaN |
| 20-Sep-2017 | 06:45:00, | NaN |
| 20-Sep-2017 | 07:00:00, | NaN |
| 20-Sep-2017 | 07:15:00, | NaN |
| 20-Sep-2017 | 07:30:00, | NaN |
| 20-Sep-2017 | 07:45:00, | NaN |
| 20-Sep-2017 | 08:00:00, | NaN |
| 20-Sep-2017 | 08:15:00, | NaN |
| 20-Sep-2017 | 08:30:00, | NaN |
| 20-Sep-2017 | 08:45:00, | NaN |
| 20-Sep-2017 | 09:00:00, | NaN |
| 20-Sep-2017 | 09:15:00, | NaN |
| 20-Sep-2017 | 09:30:00, | NaN |
| 20-Sep-2017 | 09:45:00, | NaN |
| 20-Sep-2017 | 10:00:00, | NaN |
| 20-Sep-2017 | 10:15:00, | NaN |
| 20-Sep-2017 | 10:30:00, | NaN |
| 20-Sep-2017 | 10:45:00, | NaN |
| 20-Sep-2017 | 11:00:00, | NaN |
| 20-Sep-2017 | 11:15:00, | NaN |
| 20-Sep-2017 | 11:30:00, | NaN |
| 20-Sep-2017 | 11:45:00, | NaN |
| 20-Sep-2017 | 12:00:00, | NaN |
| 20-Sep-2017 | 12:15:00, | NaN |
| 20-Sep-2017 | 12:30:00, | NaN |
| 20-Sep-2017 | 12:45:00, | NaN |
| 20-Sep-2017 | 13:00:00, | NaN |
| 20-Sep-2017 | 13:15:00, | NaN |
| 20-Sep-2017 | 13:30:00, | NaN |
| 20-Sep-2017 | 13:45:00, | NaN |
| 20-Sep-2017 | 14:00:00, | NaN |
| 20-Sep-2017 | 14:15:00, | NaN |
| 20-Sep-2017 | 14:30:00, | NaN |
| 20-Sep-2017 | 14:45:00, | NaN |
| 20-Sep-2017 | 15:00:00, | NaN |
| 20-Sep-2017 | 15:15:00, | NaN |
| 20-Sep-2017 | 15:30:00, | NaN |
| 20-Sep-2017 | 15:45:00, | NaN |
| 20-Sep-2017 | 16:00:00, | NaN |
| 20-Sep-2017 | 16:15:00, | NaN |
| 20-Sep-2017 | 16:30:00, | NaN |
| 20-Sep-2017 | 16:45:00, | NaN |
| 20-Sep-2017 | 17:00:00, | NaN |
| 20-Sep-2017 | 17:15:00, | NaN |
| 20-Sep-2017 | 17:30:00, | NaN |
| 20-Sep-2017 | 17:45:00, | NaN |
| 20-Sep-2017 | 18:00:00, | NaN |
| 20-Sep-2017 | 18:15:00, | NaN |
| 20-Sep-2017 | 18:30:00, | NaN |
| 20-Sep-2017 | 18:45:00, | NaN |
| 20-Sep-2017 | 19:00:00, | NaN |
| 20-Sep-2017 | 19:15:00, | NaN |
| 20-Sep-2017 | 19:30:00, | NaN |



|              |           |     |
|--------------|-----------|-----|
| 20-Sep-2017  | 19:45:00, | NaN |
| 20-Sep-2017  | 20:00:00, | NaN |
| 20-Sep-2017  | 20:15:00, | NaN |
| 20-Sep-2017  | 20:30:00, | NaN |
| 20-Sep-2017  | 20:45:00, | NaN |
| 20-Sep-2017  | 21:00:00, | NaN |
| 20-Sep-2017  | 21:15:00, | NaN |
| 20-Sep-2017  | 21:30:00, | NaN |
| 20-Sep-2017  | 21:45:00, | NaN |
| 20-Sep-2017  | 22:00:00, | NaN |
| 20-Sep-2017  | 22:15:00, | NaN |
| 20-Sep-2017  | 22:30:00, | NaN |
| 20-Sep-2017  | 22:45:00, | NaN |
| 20-Sep-2017  | 23:00:00, | NaN |
| 20-Sep-2017  | 23:15:00, | NaN |
| 20-Sep-2017  | 23:30:00, | NaN |
| 20-Sep-2017  | 23:45:00, | NaN |
| 21-Sep-2017, |           | NaN |
| 21-Sep-2017  | 00:15:00, | NaN |
| 21-Sep-2017  | 00:30:00, | NaN |
| 21-Sep-2017  | 00:45:00, | NaN |
| 21-Sep-2017  | 01:00:00, | NaN |
| 21-Sep-2017  | 01:15:00, | NaN |
| 21-Sep-2017  | 01:30:00, | NaN |
| 21-Sep-2017  | 01:45:00, | NaN |
| 21-Sep-2017  | 02:00:00, | NaN |
| 21-Sep-2017  | 02:15:00, | NaN |
| 21-Sep-2017  | 02:30:00, | NaN |
| 21-Sep-2017  | 02:45:00, | NaN |
| 21-Sep-2017  | 03:00:00, | NaN |
| 21-Sep-2017  | 03:15:00, | NaN |
| 21-Sep-2017  | 03:30:00, | NaN |
| 21-Sep-2017  | 03:45:00, | NaN |
| 21-Sep-2017  | 04:00:00, | NaN |
| 21-Sep-2017  | 04:15:00, | NaN |
| 21-Sep-2017  | 04:30:00, | NaN |
| 21-Sep-2017  | 04:45:00, | NaN |
| 21-Sep-2017  | 05:00:00, | NaN |
| 21-Sep-2017  | 05:15:00, | NaN |
| 21-Sep-2017  | 05:30:00, | NaN |
| 21-Sep-2017  | 05:45:00, | NaN |
| 21-Sep-2017  | 06:00:00, | NaN |
| 21-Sep-2017  | 06:15:00, | NaN |
| 21-Sep-2017  | 06:30:00, | NaN |
| 21-Sep-2017  | 06:45:00, | NaN |
| 21-Sep-2017  | 07:00:00, | NaN |
| 21-Sep-2017  | 07:15:00, | NaN |
| 21-Sep-2017  | 07:30:00, | NaN |
| 21-Sep-2017  | 07:45:00, | NaN |
| 21-Sep-2017  | 08:00:00, | NaN |
| 21-Sep-2017  | 08:15:00, | NaN |
| 21-Sep-2017  | 08:30:00, | NaN |
| 21-Sep-2017  | 08:45:00, | NaN |
| 21-Sep-2017  | 09:00:00, | NaN |
| 21-Sep-2017  | 09:15:00, | NaN |
| 21-Sep-2017  | 09:30:00, | NaN |
| 21-Sep-2017  | 09:45:00, | NaN |
| 21-Sep-2017  | 10:00:00, | NaN |
| 21-Sep-2017  | 10:15:00, | NaN |
| 21-Sep-2017  | 10:30:00, | NaN |
| 21-Sep-2017  | 10:45:00, | NaN |
| 21-Sep-2017  | 11:00:00, | NaN |
| 21-Sep-2017  | 11:15:00, | NaN |
| 21-Sep-2017  | 11:30:00, | NaN |

|              |           |     |
|--------------|-----------|-----|
| 21-Sep-2017  | 11:45:00, | NaN |
| 21-Sep-2017  | 12:00:00, | NaN |
| 21-Sep-2017  | 12:15:00, | NaN |
| 21-Sep-2017  | 12:30:00, | NaN |
| 21-Sep-2017  | 12:45:00, | NaN |
| 21-Sep-2017  | 13:00:00, | NaN |
| 21-Sep-2017  | 13:15:00, | NaN |
| 21-Sep-2017  | 13:30:00, | NaN |
| 21-Sep-2017  | 13:45:00, | NaN |
| 21-Sep-2017  | 14:00:00, | NaN |
| 21-Sep-2017  | 14:15:00, | NaN |
| 21-Sep-2017  | 14:30:00, | NaN |
| 21-Sep-2017  | 14:45:00, | NaN |
| 21-Sep-2017  | 15:00:00, | NaN |
| 21-Sep-2017  | 15:15:00, | NaN |
| 21-Sep-2017  | 15:30:00, | NaN |
| 21-Sep-2017  | 15:45:00, | NaN |
| 21-Sep-2017  | 16:00:00, | NaN |
| 21-Sep-2017  | 16:15:00, | NaN |
| 21-Sep-2017  | 16:30:00, | NaN |
| 21-Sep-2017  | 16:45:00, | NaN |
| 21-Sep-2017  | 17:00:00, | NaN |
| 21-Sep-2017  | 17:15:00, | NaN |
| 21-Sep-2017  | 17:30:00, | NaN |
| 21-Sep-2017  | 17:45:00, | NaN |
| 21-Sep-2017  | 18:00:00, | NaN |
| 21-Sep-2017  | 18:15:00, | NaN |
| 21-Sep-2017  | 18:30:00, | NaN |
| 21-Sep-2017  | 18:45:00, | NaN |
| 21-Sep-2017  | 19:00:00, | NaN |
| 21-Sep-2017  | 19:15:00, | NaN |
| 21-Sep-2017  | 19:30:00, | NaN |
| 21-Sep-2017  | 19:45:00, | NaN |
| 21-Sep-2017  | 20:00:00, | NaN |
| 21-Sep-2017  | 20:15:00, | NaN |
| 21-Sep-2017  | 20:30:00, | NaN |
| 21-Sep-2017  | 20:45:00, | NaN |
| 21-Sep-2017  | 21:00:00, | NaN |
| 21-Sep-2017  | 21:15:00, | NaN |
| 21-Sep-2017  | 21:30:00, | NaN |
| 21-Sep-2017  | 21:45:00, | NaN |
| 21-Sep-2017  | 22:00:00, | NaN |
| 21-Sep-2017  | 22:15:00, | NaN |
| 21-Sep-2017  | 22:30:00, | NaN |
| 21-Sep-2017  | 22:45:00, | NaN |
| 21-Sep-2017  | 23:00:00, | NaN |
| 21-Sep-2017  | 23:15:00, | NaN |
| 21-Sep-2017  | 23:30:00, | NaN |
| 21-Sep-2017  | 23:45:00, | NaN |
| 22-Sep-2017, | NaN       |     |
| 22-Sep-2017  | 00:15:00, | NaN |
| 22-Sep-2017  | 00:30:00, | NaN |
| 22-Sep-2017  | 00:45:00, | NaN |
| 22-Sep-2017  | 01:00:00, | NaN |
| 22-Sep-2017  | 01:15:00, | NaN |
| 22-Sep-2017  | 01:30:00, | NaN |
| 22-Sep-2017  | 01:45:00, | NaN |
| 22-Sep-2017  | 02:00:00, | NaN |
| 22-Sep-2017  | 02:15:00, | NaN |
| 22-Sep-2017  | 02:30:00, | NaN |
| 22-Sep-2017  | 02:45:00, | NaN |
| 22-Sep-2017  | 03:00:00, | NaN |
| 22-Sep-2017  | 03:15:00, | NaN |
| 22-Sep-2017  | 03:30:00, | NaN |

|             |           |     |
|-------------|-----------|-----|
| 22-Sep-2017 | 03:45:00, | NaN |
| 22-Sep-2017 | 04:00:00, | NaN |
| 22-Sep-2017 | 04:15:00, | NaN |
| 22-Sep-2017 | 04:30:00, | NaN |
| 22-Sep-2017 | 04:45:00, | NaN |
| 22-Sep-2017 | 05:00:00, | NaN |
| 22-Sep-2017 | 05:15:00, | NaN |
| 22-Sep-2017 | 05:30:00, | NaN |
| 22-Sep-2017 | 05:45:00, | NaN |
| 22-Sep-2017 | 06:00:00, | NaN |
| 22-Sep-2017 | 06:15:00, | NaN |
| 22-Sep-2017 | 06:30:00, | NaN |
| 22-Sep-2017 | 06:45:00, | NaN |
| 22-Sep-2017 | 07:00:00, | NaN |
| 22-Sep-2017 | 07:15:00, | NaN |
| 22-Sep-2017 | 07:30:00, | NaN |
| 22-Sep-2017 | 07:45:00, | NaN |
| 22-Sep-2017 | 08:00:00, | NaN |
| 22-Sep-2017 | 08:15:00, | NaN |
| 22-Sep-2017 | 08:30:00, | NaN |
| 22-Sep-2017 | 08:45:00, | NaN |
| 22-Sep-2017 | 09:00:00, | NaN |
| 22-Sep-2017 | 09:15:00, | NaN |
| 22-Sep-2017 | 09:30:00, | NaN |
| 22-Sep-2017 | 09:45:00, | NaN |
| 22-Sep-2017 | 10:00:00, | NaN |
| 22-Sep-2017 | 10:15:00, | NaN |
| 22-Sep-2017 | 10:30:00, | NaN |
| 22-Sep-2017 | 10:45:00, | NaN |
| 22-Sep-2017 | 11:00:00, | NaN |
| 22-Sep-2017 | 11:15:00, | NaN |
| 22-Sep-2017 | 11:30:00, | NaN |
| 22-Sep-2017 | 11:45:00, | NaN |
| 22-Sep-2017 | 12:00:00, | NaN |
| 22-Sep-2017 | 12:15:00, | NaN |
| 22-Sep-2017 | 12:30:00, | NaN |
| 22-Sep-2017 | 12:45:00, | NaN |
| 22-Sep-2017 | 13:00:00, | NaN |
| 22-Sep-2017 | 13:15:00, | NaN |
| 22-Sep-2017 | 13:30:00, | NaN |
| 22-Sep-2017 | 13:45:00, | NaN |
| 22-Sep-2017 | 14:00:00, | NaN |
| 22-Sep-2017 | 14:15:00, | NaN |
| 22-Sep-2017 | 14:30:00, | NaN |
| 22-Sep-2017 | 14:45:00, | NaN |
| 22-Sep-2017 | 15:00:00, | NaN |
| 22-Sep-2017 | 15:15:00, | NaN |
| 22-Sep-2017 | 15:30:00, | NaN |
| 22-Sep-2017 | 15:45:00, | NaN |
| 22-Sep-2017 | 16:00:00, | NaN |
| 22-Sep-2017 | 16:15:00, | NaN |
| 22-Sep-2017 | 16:30:00, | NaN |
| 22-Sep-2017 | 16:45:00, | NaN |
| 22-Sep-2017 | 17:00:00, | NaN |
| 22-Sep-2017 | 17:15:00, | NaN |
| 22-Sep-2017 | 17:30:00, | NaN |
| 22-Sep-2017 | 17:45:00, | NaN |
| 22-Sep-2017 | 18:00:00, | NaN |
| 22-Sep-2017 | 18:15:00, | NaN |
| 22-Sep-2017 | 18:30:00, | NaN |
| 22-Sep-2017 | 18:45:00, | NaN |
| 22-Sep-2017 | 19:00:00, | NaN |
| 22-Sep-2017 | 19:15:00, | NaN |
| 22-Sep-2017 | 19:30:00, | NaN |

|              |           |     |
|--------------|-----------|-----|
| 22-Sep-2017  | 19:45:00, | NaN |
| 22-Sep-2017  | 20:00:00, | NaN |
| 22-Sep-2017  | 20:15:00, | NaN |
| 22-Sep-2017  | 20:30:00, | NaN |
| 22-Sep-2017  | 20:45:00, | NaN |
| 22-Sep-2017  | 21:00:00, | NaN |
| 22-Sep-2017  | 21:15:00, | NaN |
| 22-Sep-2017  | 21:30:00, | NaN |
| 22-Sep-2017  | 21:45:00, | NaN |
| 22-Sep-2017  | 22:00:00, | NaN |
| 22-Sep-2017  | 22:15:00, | NaN |
| 22-Sep-2017  | 22:30:00, | NaN |
| 22-Sep-2017  | 22:45:00, | NaN |
| 22-Sep-2017  | 23:00:00, | NaN |
| 22-Sep-2017  | 23:15:00, | NaN |
| 22-Sep-2017  | 23:30:00, | NaN |
| 22-Sep-2017  | 23:45:00, | NaN |
| 23-Sep-2017, |           | NaN |
| 23-Sep-2017  | 00:15:00, | NaN |
| 23-Sep-2017  | 00:30:00, | NaN |
| 23-Sep-2017  | 00:45:00, | NaN |
| 23-Sep-2017  | 01:00:00, | NaN |
| 23-Sep-2017  | 01:15:00, | NaN |
| 23-Sep-2017  | 01:30:00, | NaN |
| 23-Sep-2017  | 01:45:00, | NaN |
| 23-Sep-2017  | 02:00:00, | NaN |
| 23-Sep-2017  | 02:15:00, | NaN |
| 23-Sep-2017  | 02:30:00, | NaN |
| 23-Sep-2017  | 02:45:00, | NaN |
| 23-Sep-2017  | 03:00:00, | NaN |
| 23-Sep-2017  | 03:15:00, | NaN |
| 23-Sep-2017  | 03:30:00, | NaN |
| 23-Sep-2017  | 03:45:00, | NaN |
| 23-Sep-2017  | 04:00:00, | NaN |
| 23-Sep-2017  | 04:15:00, | NaN |
| 23-Sep-2017  | 04:30:00, | NaN |
| 23-Sep-2017  | 04:45:00, | NaN |
| 23-Sep-2017  | 05:00:00, | NaN |
| 23-Sep-2017  | 05:15:00, | NaN |
| 23-Sep-2017  | 05:30:00, | NaN |
| 23-Sep-2017  | 05:45:00, | NaN |
| 23-Sep-2017  | 06:00:00, | NaN |
| 23-Sep-2017  | 06:15:00, | NaN |
| 23-Sep-2017  | 06:30:00, | NaN |
| 23-Sep-2017  | 06:45:00, | NaN |
| 23-Sep-2017  | 07:00:00, | NaN |
| 23-Sep-2017  | 07:15:00, | NaN |
| 23-Sep-2017  | 07:30:00, | NaN |
| 23-Sep-2017  | 07:45:00, | NaN |
| 23-Sep-2017  | 08:00:00, | NaN |
| 23-Sep-2017  | 08:15:00, | NaN |
| 23-Sep-2017  | 08:30:00, | NaN |
| 23-Sep-2017  | 08:45:00, | NaN |
| 23-Sep-2017  | 09:00:00, | NaN |
| 23-Sep-2017  | 09:15:00, | NaN |
| 23-Sep-2017  | 09:30:00, | NaN |
| 23-Sep-2017  | 09:45:00, | NaN |
| 23-Sep-2017  | 10:00:00, | NaN |
| 23-Sep-2017  | 10:15:00, | NaN |
| 23-Sep-2017  | 10:30:00, | NaN |
| 23-Sep-2017  | 10:45:00, | NaN |
| 23-Sep-2017  | 11:00:00, | NaN |
| 23-Sep-2017  | 11:15:00, | NaN |
| 23-Sep-2017  | 11:30:00, | NaN |

|              |           |     |
|--------------|-----------|-----|
| 23-Sep-2017  | 11:45:00, | NaN |
| 23-Sep-2017  | 12:00:00, | NaN |
| 23-Sep-2017  | 12:15:00, | NaN |
| 23-Sep-2017  | 12:30:00, | NaN |
| 23-Sep-2017  | 12:45:00, | NaN |
| 23-Sep-2017  | 13:00:00, | NaN |
| 23-Sep-2017  | 13:15:00, | NaN |
| 23-Sep-2017  | 13:30:00, | NaN |
| 23-Sep-2017  | 13:45:00, | NaN |
| 23-Sep-2017  | 14:00:00, | NaN |
| 23-Sep-2017  | 14:15:00, | NaN |
| 23-Sep-2017  | 14:30:00, | NaN |
| 23-Sep-2017  | 14:45:00, | NaN |
| 23-Sep-2017  | 15:00:00, | NaN |
| 23-Sep-2017  | 15:15:00, | NaN |
| 23-Sep-2017  | 15:30:00, | NaN |
| 23-Sep-2017  | 15:45:00, | NaN |
| 23-Sep-2017  | 16:00:00, | NaN |
| 23-Sep-2017  | 16:15:00, | NaN |
| 23-Sep-2017  | 16:30:00, | NaN |
| 23-Sep-2017  | 16:45:00, | NaN |
| 23-Sep-2017  | 17:00:00, | NaN |
| 23-Sep-2017  | 17:15:00, | NaN |
| 23-Sep-2017  | 17:30:00, | NaN |
| 23-Sep-2017  | 17:45:00, | NaN |
| 23-Sep-2017  | 18:00:00, | NaN |
| 23-Sep-2017  | 18:15:00, | NaN |
| 23-Sep-2017  | 18:30:00, | NaN |
| 23-Sep-2017  | 18:45:00, | NaN |
| 23-Sep-2017  | 19:00:00, | NaN |
| 23-Sep-2017  | 19:15:00, | NaN |
| 23-Sep-2017  | 19:30:00, | NaN |
| 23-Sep-2017  | 19:45:00, | NaN |
| 23-Sep-2017  | 20:00:00, | NaN |
| 23-Sep-2017  | 20:15:00, | NaN |
| 23-Sep-2017  | 20:30:00, | NaN |
| 23-Sep-2017  | 20:45:00, | NaN |
| 23-Sep-2017  | 21:00:00, | NaN |
| 23-Sep-2017  | 21:15:00, | NaN |
| 23-Sep-2017  | 21:30:00, | NaN |
| 23-Sep-2017  | 21:45:00, | NaN |
| 23-Sep-2017  | 22:00:00, | NaN |
| 23-Sep-2017  | 22:15:00, | NaN |
| 23-Sep-2017  | 22:30:00, | NaN |
| 23-Sep-2017  | 22:45:00, | NaN |
| 23-Sep-2017  | 23:00:00, | NaN |
| 23-Sep-2017  | 23:15:00, | NaN |
| 23-Sep-2017  | 23:30:00, | NaN |
| 23-Sep-2017  | 23:45:00, | NaN |
| 24-Sep-2017, | NaN       |     |
| 24-Sep-2017  | 00:15:00, | NaN |
| 24-Sep-2017  | 00:30:00, | NaN |
| 24-Sep-2017  | 00:45:00, | NaN |
| 24-Sep-2017  | 01:00:00, | NaN |
| 24-Sep-2017  | 01:15:00, | NaN |
| 24-Sep-2017  | 01:30:00, | NaN |
| 24-Sep-2017  | 01:45:00, | NaN |
| 24-Sep-2017  | 02:00:00, | NaN |
| 24-Sep-2017  | 02:15:00, | NaN |
| 24-Sep-2017  | 02:30:00, | NaN |
| 24-Sep-2017  | 02:45:00, | NaN |
| 24-Sep-2017  | 03:00:00, | NaN |
| 24-Sep-2017  | 03:15:00, | NaN |
| 24-Sep-2017  | 03:30:00, | NaN |

|             |           |     |
|-------------|-----------|-----|
| 24-Sep-2017 | 03:45:00, | NaN |
| 24-Sep-2017 | 04:00:00, | NaN |
| 24-Sep-2017 | 04:15:00, | NaN |
| 24-Sep-2017 | 04:30:00, | NaN |
| 24-Sep-2017 | 04:45:00, | NaN |
| 24-Sep-2017 | 05:00:00, | NaN |
| 24-Sep-2017 | 05:15:00, | NaN |
| 24-Sep-2017 | 05:30:00, | NaN |
| 24-Sep-2017 | 05:45:00, | NaN |
| 24-Sep-2017 | 06:00:00, | NaN |
| 24-Sep-2017 | 06:15:00, | NaN |
| 24-Sep-2017 | 06:30:00, | NaN |
| 24-Sep-2017 | 06:45:00, | NaN |
| 24-Sep-2017 | 07:00:00, | NaN |
| 24-Sep-2017 | 07:15:00, | NaN |
| 24-Sep-2017 | 07:30:00, | NaN |
| 24-Sep-2017 | 07:45:00, | NaN |
| 24-Sep-2017 | 08:00:00, | NaN |
| 24-Sep-2017 | 08:15:00, | NaN |
| 24-Sep-2017 | 08:30:00, | NaN |
| 24-Sep-2017 | 08:45:00, | NaN |
| 24-Sep-2017 | 09:00:00, | NaN |
| 24-Sep-2017 | 09:15:00, | NaN |
| 24-Sep-2017 | 09:30:00, | NaN |
| 24-Sep-2017 | 09:45:00, | NaN |
| 24-Sep-2017 | 10:00:00, | NaN |
| 24-Sep-2017 | 10:15:00, | NaN |
| 24-Sep-2017 | 10:30:00, | NaN |
| 24-Sep-2017 | 10:45:00, | NaN |
| 24-Sep-2017 | 11:00:00, | NaN |
| 24-Sep-2017 | 11:15:00, | NaN |
| 24-Sep-2017 | 11:30:00, | NaN |
| 24-Sep-2017 | 11:45:00, | NaN |
| 24-Sep-2017 | 12:00:00, | NaN |
| 24-Sep-2017 | 12:15:00, | NaN |
| 24-Sep-2017 | 12:30:00, | NaN |
| 24-Sep-2017 | 12:45:00, | NaN |
| 24-Sep-2017 | 13:00:00, | NaN |
| 24-Sep-2017 | 13:15:00, | NaN |
| 24-Sep-2017 | 13:30:00, | NaN |
| 24-Sep-2017 | 13:45:00, | NaN |
| 24-Sep-2017 | 14:00:00, | NaN |
| 24-Sep-2017 | 14:15:00, | NaN |
| 24-Sep-2017 | 14:30:00, | NaN |
| 24-Sep-2017 | 14:45:00, | NaN |
| 24-Sep-2017 | 15:00:00, | NaN |
| 24-Sep-2017 | 15:15:00, | NaN |
| 24-Sep-2017 | 15:30:00, | NaN |
| 24-Sep-2017 | 15:45:00, | NaN |
| 24-Sep-2017 | 16:00:00, | NaN |
| 24-Sep-2017 | 16:15:00, | NaN |
| 24-Sep-2017 | 16:30:00, | NaN |
| 24-Sep-2017 | 16:45:00, | NaN |
| 24-Sep-2017 | 17:00:00, | NaN |
| 24-Sep-2017 | 17:15:00, | NaN |
| 24-Sep-2017 | 17:30:00, | NaN |
| 24-Sep-2017 | 17:45:00, | NaN |
| 24-Sep-2017 | 18:00:00, | NaN |
| 24-Sep-2017 | 18:15:00, | NaN |
| 24-Sep-2017 | 18:30:00, | NaN |
| 24-Sep-2017 | 18:45:00, | NaN |
| 24-Sep-2017 | 19:00:00, | NaN |
| 24-Sep-2017 | 19:15:00, | NaN |
| 24-Sep-2017 | 19:30:00, | NaN |

|              |           |     |
|--------------|-----------|-----|
| 24-Sep-2017  | 19:45:00, | NaN |
| 24-Sep-2017  | 20:00:00, | NaN |
| 24-Sep-2017  | 20:15:00, | NaN |
| 24-Sep-2017  | 20:30:00, | NaN |
| 24-Sep-2017  | 20:45:00, | NaN |
| 24-Sep-2017  | 21:00:00, | NaN |
| 24-Sep-2017  | 21:15:00, | NaN |
| 24-Sep-2017  | 21:30:00, | NaN |
| 24-Sep-2017  | 21:45:00, | NaN |
| 24-Sep-2017  | 22:00:00, | NaN |
| 24-Sep-2017  | 22:15:00, | NaN |
| 24-Sep-2017  | 22:30:00, | NaN |
| 24-Sep-2017  | 22:45:00, | NaN |
| 24-Sep-2017  | 23:00:00, | NaN |
| 24-Sep-2017  | 23:15:00, | NaN |
| 24-Sep-2017  | 23:30:00, | NaN |
| 24-Sep-2017  | 23:45:00, | NaN |
| 25-Sep-2017, |           | NaN |
| 25-Sep-2017  | 00:15:00, | NaN |
| 25-Sep-2017  | 00:30:00, | NaN |
| 25-Sep-2017  | 00:45:00, | NaN |
| 25-Sep-2017  | 01:00:00, | NaN |
| 25-Sep-2017  | 01:15:00, | NaN |
| 25-Sep-2017  | 01:30:00, | NaN |
| 25-Sep-2017  | 01:45:00, | NaN |
| 25-Sep-2017  | 02:00:00, | NaN |
| 25-Sep-2017  | 02:15:00, | NaN |
| 25-Sep-2017  | 02:30:00, | NaN |
| 25-Sep-2017  | 02:45:00, | NaN |
| 25-Sep-2017  | 03:00:00, | NaN |
| 25-Sep-2017  | 03:15:00, | NaN |
| 25-Sep-2017  | 03:30:00, | NaN |
| 25-Sep-2017  | 03:45:00, | NaN |
| 25-Sep-2017  | 04:00:00, | NaN |
| 25-Sep-2017  | 04:15:00, | NaN |
| 25-Sep-2017  | 04:30:00, | NaN |
| 25-Sep-2017  | 04:45:00, | NaN |
| 25-Sep-2017  | 05:00:00, | NaN |
| 25-Sep-2017  | 05:15:00, | NaN |
| 25-Sep-2017  | 05:30:00, | NaN |
| 25-Sep-2017  | 05:45:00, | NaN |
| 25-Sep-2017  | 06:00:00, | NaN |
| 25-Sep-2017  | 06:15:00, | NaN |
| 25-Sep-2017  | 06:30:00, | NaN |
| 25-Sep-2017  | 06:45:00, | NaN |
| 25-Sep-2017  | 07:00:00, | NaN |
| 25-Sep-2017  | 07:15:00, | NaN |
| 25-Sep-2017  | 07:30:00, | NaN |
| 25-Sep-2017  | 07:45:00, | NaN |
| 25-Sep-2017  | 08:00:00, | NaN |
| 25-Sep-2017  | 08:15:00, | NaN |
| 25-Sep-2017  | 08:30:00, | NaN |
| 25-Sep-2017  | 08:45:00, | NaN |
| 25-Sep-2017  | 09:00:00, | NaN |
| 25-Sep-2017  | 09:15:00, | NaN |
| 25-Sep-2017  | 09:30:00, | NaN |
| 25-Sep-2017  | 09:45:00, | NaN |
| 25-Sep-2017  | 10:00:00, | NaN |
| 25-Sep-2017  | 10:15:00, | NaN |
| 25-Sep-2017  | 10:30:00, | NaN |
| 25-Sep-2017  | 10:45:00, | NaN |
| 25-Sep-2017  | 11:00:00, | NaN |
| 25-Sep-2017  | 11:15:00, | NaN |
| 25-Sep-2017  | 11:30:00, | NaN |

|              |           |     |
|--------------|-----------|-----|
| 25-Sep-2017  | 11:45:00, | NaN |
| 25-Sep-2017  | 12:00:00, | NaN |
| 25-Sep-2017  | 12:15:00, | NaN |
| 25-Sep-2017  | 12:30:00, | NaN |
| 25-Sep-2017  | 12:45:00, | NaN |
| 25-Sep-2017  | 13:00:00, | NaN |
| 25-Sep-2017  | 13:15:00, | NaN |
| 25-Sep-2017  | 13:30:00, | NaN |
| 25-Sep-2017  | 13:45:00, | NaN |
| 25-Sep-2017  | 14:00:00, | NaN |
| 25-Sep-2017  | 14:15:00, | NaN |
| 25-Sep-2017  | 14:30:00, | NaN |
| 25-Sep-2017  | 14:45:00, | NaN |
| 25-Sep-2017  | 15:00:00, | NaN |
| 25-Sep-2017  | 15:15:00, | NaN |
| 25-Sep-2017  | 15:30:00, | NaN |
| 25-Sep-2017  | 15:45:00, | NaN |
| 25-Sep-2017  | 16:00:00, | NaN |
| 25-Sep-2017  | 16:15:00, | NaN |
| 25-Sep-2017  | 16:30:00, | NaN |
| 25-Sep-2017  | 16:45:00, | NaN |
| 25-Sep-2017  | 17:00:00, | NaN |
| 25-Sep-2017  | 17:15:00, | NaN |
| 25-Sep-2017  | 17:30:00, | NaN |
| 25-Sep-2017  | 17:45:00, | NaN |
| 25-Sep-2017  | 18:00:00, | NaN |
| 25-Sep-2017  | 18:15:00, | NaN |
| 25-Sep-2017  | 18:30:00, | NaN |
| 25-Sep-2017  | 18:45:00, | NaN |
| 25-Sep-2017  | 19:00:00, | NaN |
| 25-Sep-2017  | 19:15:00, | NaN |
| 25-Sep-2017  | 19:30:00, | NaN |
| 25-Sep-2017  | 19:45:00, | NaN |
| 25-Sep-2017  | 20:00:00, | NaN |
| 25-Sep-2017  | 20:15:00, | NaN |
| 25-Sep-2017  | 20:30:00, | NaN |
| 25-Sep-2017  | 20:45:00, | NaN |
| 25-Sep-2017  | 21:00:00, | NaN |
| 25-Sep-2017  | 21:15:00, | NaN |
| 25-Sep-2017  | 21:30:00, | NaN |
| 25-Sep-2017  | 21:45:00, | NaN |
| 25-Sep-2017  | 22:00:00, | NaN |
| 25-Sep-2017  | 22:15:00, | NaN |
| 25-Sep-2017  | 22:30:00, | NaN |
| 25-Sep-2017  | 22:45:00, | NaN |
| 25-Sep-2017  | 23:00:00, | NaN |
| 25-Sep-2017  | 23:15:00, | NaN |
| 25-Sep-2017  | 23:30:00, | NaN |
| 25-Sep-2017  | 23:45:00, | NaN |
| 26-Sep-2017, | NaN       |     |
| 26-Sep-2017  | 00:15:00, | NaN |
| 26-Sep-2017  | 00:30:00, | NaN |
| 26-Sep-2017  | 00:45:00, | NaN |
| 26-Sep-2017  | 01:00:00, | NaN |
| 26-Sep-2017  | 01:15:00, | NaN |
| 26-Sep-2017  | 01:30:00, | NaN |
| 26-Sep-2017  | 01:45:00, | NaN |
| 26-Sep-2017  | 02:00:00, | NaN |
| 26-Sep-2017  | 02:15:00, | NaN |
| 26-Sep-2017  | 02:30:00, | NaN |
| 26-Sep-2017  | 02:45:00, | NaN |
| 26-Sep-2017  | 03:00:00, | NaN |
| 26-Sep-2017  | 03:15:00, | NaN |
| 26-Sep-2017  | 03:30:00, | NaN |



|             |           |     |
|-------------|-----------|-----|
| 26-Sep-2017 | 03:45:00, | NaN |
| 26-Sep-2017 | 04:00:00, | NaN |
| 26-Sep-2017 | 04:15:00, | NaN |
| 26-Sep-2017 | 04:30:00, | NaN |
| 26-Sep-2017 | 04:45:00, | NaN |
| 26-Sep-2017 | 05:00:00, | NaN |
| 26-Sep-2017 | 05:15:00, | NaN |
| 26-Sep-2017 | 05:30:00, | NaN |
| 26-Sep-2017 | 05:45:00, | NaN |
| 26-Sep-2017 | 06:00:00, | NaN |
| 26-Sep-2017 | 06:15:00, | NaN |
| 26-Sep-2017 | 06:30:00, | NaN |
| 26-Sep-2017 | 06:45:00, | NaN |
| 26-Sep-2017 | 07:00:00, | NaN |
| 26-Sep-2017 | 07:15:00, | NaN |
| 26-Sep-2017 | 07:30:00, | NaN |
| 26-Sep-2017 | 07:45:00, | NaN |
| 26-Sep-2017 | 08:00:00, | NaN |
| 26-Sep-2017 | 08:15:00, | NaN |
| 26-Sep-2017 | 08:30:00, | NaN |
| 26-Sep-2017 | 08:45:00, | NaN |
| 26-Sep-2017 | 09:00:00, | NaN |
| 26-Sep-2017 | 09:15:00, | NaN |
| 26-Sep-2017 | 09:30:00, | NaN |
| 26-Sep-2017 | 09:45:00, | NaN |
| 26-Sep-2017 | 10:00:00, | NaN |
| 26-Sep-2017 | 10:15:00, | NaN |
| 26-Sep-2017 | 10:30:00, | NaN |
| 26-Sep-2017 | 10:45:00, | NaN |
| 26-Sep-2017 | 11:00:00, | NaN |
| 26-Sep-2017 | 11:15:00, | NaN |
| 26-Sep-2017 | 11:30:00, | NaN |
| 26-Sep-2017 | 11:45:00, | NaN |
| 26-Sep-2017 | 12:00:00, | NaN |
| 26-Sep-2017 | 12:15:00, | NaN |
| 26-Sep-2017 | 12:30:00, | NaN |
| 26-Sep-2017 | 12:45:00, | NaN |
| 26-Sep-2017 | 13:00:00, | NaN |
| 26-Sep-2017 | 13:15:00, | NaN |
| 26-Sep-2017 | 13:30:00, | NaN |
| 26-Sep-2017 | 13:45:00, | NaN |
| 26-Sep-2017 | 14:00:00, | NaN |
| 26-Sep-2017 | 14:15:00, | NaN |
| 26-Sep-2017 | 14:30:00, | NaN |
| 26-Sep-2017 | 14:45:00, | NaN |
| 26-Sep-2017 | 15:00:00, | NaN |
| 26-Sep-2017 | 15:15:00, | NaN |
| 26-Sep-2017 | 15:30:00, | NaN |
| 26-Sep-2017 | 15:45:00, | NaN |
| 26-Sep-2017 | 16:00:00, | NaN |
| 26-Sep-2017 | 16:15:00, | NaN |
| 26-Sep-2017 | 16:30:00, | NaN |
| 26-Sep-2017 | 16:45:00, | NaN |
| 26-Sep-2017 | 17:00:00, | NaN |
| 26-Sep-2017 | 17:15:00, | NaN |
| 26-Sep-2017 | 17:30:00, | NaN |
| 26-Sep-2017 | 17:45:00, | NaN |
| 26-Sep-2017 | 18:00:00, | NaN |
| 26-Sep-2017 | 18:15:00, | NaN |
| 26-Sep-2017 | 18:30:00, | NaN |
| 26-Sep-2017 | 18:45:00, | NaN |
| 26-Sep-2017 | 19:00:00, | NaN |
| 26-Sep-2017 | 19:15:00, | NaN |
| 26-Sep-2017 | 19:30:00, | NaN |

|              |           |     |
|--------------|-----------|-----|
| 26-Sep-2017  | 19:45:00, | NaN |
| 26-Sep-2017  | 20:00:00, | NaN |
| 26-Sep-2017  | 20:15:00, | NaN |
| 26-Sep-2017  | 20:30:00, | NaN |
| 26-Sep-2017  | 20:45:00, | NaN |
| 26-Sep-2017  | 21:00:00, | NaN |
| 26-Sep-2017  | 21:15:00, | NaN |
| 26-Sep-2017  | 21:30:00, | NaN |
| 26-Sep-2017  | 21:45:00, | NaN |
| 26-Sep-2017  | 22:00:00, | NaN |
| 26-Sep-2017  | 22:15:00, | NaN |
| 26-Sep-2017  | 22:30:00, | NaN |
| 26-Sep-2017  | 22:45:00, | NaN |
| 26-Sep-2017  | 23:00:00, | NaN |
| 26-Sep-2017  | 23:15:00, | NaN |
| 26-Sep-2017  | 23:30:00, | NaN |
| 26-Sep-2017  | 23:45:00, | NaN |
| 27-Sep-2017, |           | NaN |
| 27-Sep-2017  | 00:15:00, | NaN |
| 27-Sep-2017  | 00:30:00, | NaN |
| 27-Sep-2017  | 00:45:00, | NaN |
| 27-Sep-2017  | 01:00:00, | NaN |
| 27-Sep-2017  | 01:15:00, | NaN |
| 27-Sep-2017  | 01:30:00, | NaN |
| 27-Sep-2017  | 01:45:00, | NaN |
| 27-Sep-2017  | 02:00:00, | NaN |
| 27-Sep-2017  | 02:15:00, | NaN |
| 27-Sep-2017  | 02:30:00, | NaN |
| 27-Sep-2017  | 02:45:00, | NaN |
| 27-Sep-2017  | 03:00:00, | NaN |
| 27-Sep-2017  | 03:15:00, | NaN |
| 27-Sep-2017  | 03:30:00, | NaN |
| 27-Sep-2017  | 03:45:00, | NaN |
| 27-Sep-2017  | 04:00:00, | NaN |
| 27-Sep-2017  | 04:15:00, | NaN |
| 27-Sep-2017  | 04:30:00, | NaN |
| 27-Sep-2017  | 04:45:00, | NaN |
| 27-Sep-2017  | 05:00:00, | NaN |
| 27-Sep-2017  | 05:15:00, | NaN |
| 27-Sep-2017  | 05:30:00, | NaN |
| 27-Sep-2017  | 05:45:00, | NaN |
| 27-Sep-2017  | 06:00:00, | NaN |
| 27-Sep-2017  | 06:15:00, | NaN |
| 27-Sep-2017  | 06:30:00, | NaN |
| 27-Sep-2017  | 06:45:00, | NaN |
| 27-Sep-2017  | 07:00:00, | NaN |
| 27-Sep-2017  | 07:15:00, | NaN |
| 27-Sep-2017  | 07:30:00, | NaN |
| 27-Sep-2017  | 07:45:00, | NaN |
| 27-Sep-2017  | 08:00:00, | NaN |
| 27-Sep-2017  | 08:15:00, | NaN |
| 27-Sep-2017  | 08:30:00, | NaN |
| 27-Sep-2017  | 08:45:00, | NaN |
| 27-Sep-2017  | 09:00:00, | NaN |
| 27-Sep-2017  | 09:15:00, | NaN |
| 27-Sep-2017  | 09:30:00, | NaN |
| 27-Sep-2017  | 09:45:00, | NaN |
| 27-Sep-2017  | 10:00:00, | NaN |
| 27-Sep-2017  | 10:15:00, | NaN |
| 27-Sep-2017  | 10:30:00, | NaN |
| 27-Sep-2017  | 10:45:00, | NaN |
| 27-Sep-2017  | 11:00:00, | NaN |
| 27-Sep-2017  | 11:15:00, | NaN |
| 27-Sep-2017  | 11:30:00, | NaN |

|              |           |     |
|--------------|-----------|-----|
| 27-Sep-2017  | 11:45:00, | NaN |
| 27-Sep-2017  | 12:00:00, | NaN |
| 27-Sep-2017  | 12:15:00, | NaN |
| 27-Sep-2017  | 12:30:00, | NaN |
| 27-Sep-2017  | 12:45:00, | NaN |
| 27-Sep-2017  | 13:00:00, | NaN |
| 27-Sep-2017  | 13:15:00, | NaN |
| 27-Sep-2017  | 13:30:00, | NaN |
| 27-Sep-2017  | 13:45:00, | NaN |
| 27-Sep-2017  | 14:00:00, | NaN |
| 27-Sep-2017  | 14:15:00, | NaN |
| 27-Sep-2017  | 14:30:00, | NaN |
| 27-Sep-2017  | 14:45:00, | NaN |
| 27-Sep-2017  | 15:00:00, | NaN |
| 27-Sep-2017  | 15:15:00, | NaN |
| 27-Sep-2017  | 15:30:00, | NaN |
| 27-Sep-2017  | 15:45:00, | NaN |
| 27-Sep-2017  | 16:00:00, | NaN |
| 27-Sep-2017  | 16:15:00, | NaN |
| 27-Sep-2017  | 16:30:00, | NaN |
| 27-Sep-2017  | 16:45:00, | NaN |
| 27-Sep-2017  | 17:00:00, | NaN |
| 27-Sep-2017  | 17:15:00, | NaN |
| 27-Sep-2017  | 17:30:00, | NaN |
| 27-Sep-2017  | 17:45:00, | NaN |
| 27-Sep-2017  | 18:00:00, | NaN |
| 27-Sep-2017  | 18:15:00, | NaN |
| 27-Sep-2017  | 18:30:00, | NaN |
| 27-Sep-2017  | 18:45:00, | NaN |
| 27-Sep-2017  | 19:00:00, | NaN |
| 27-Sep-2017  | 19:15:00, | NaN |
| 27-Sep-2017  | 19:30:00, | NaN |
| 27-Sep-2017  | 19:45:00, | NaN |
| 27-Sep-2017  | 20:00:00, | NaN |
| 27-Sep-2017  | 20:15:00, | NaN |
| 27-Sep-2017  | 20:30:00, | NaN |
| 27-Sep-2017  | 20:45:00, | NaN |
| 27-Sep-2017  | 21:00:00, | NaN |
| 27-Sep-2017  | 21:15:00, | NaN |
| 27-Sep-2017  | 21:30:00, | NaN |
| 27-Sep-2017  | 21:45:00, | NaN |
| 27-Sep-2017  | 22:00:00, | NaN |
| 27-Sep-2017  | 22:15:00, | NaN |
| 27-Sep-2017  | 22:30:00, | NaN |
| 27-Sep-2017  | 22:45:00, | NaN |
| 27-Sep-2017  | 23:00:00, | NaN |
| 27-Sep-2017  | 23:15:00, | NaN |
| 27-Sep-2017  | 23:30:00, | NaN |
| 27-Sep-2017  | 23:45:00, | NaN |
| 28-Sep-2017, | NaN       |     |
| 28-Sep-2017  | 00:15:00, | NaN |
| 28-Sep-2017  | 00:30:00, | NaN |
| 28-Sep-2017  | 00:45:00, | NaN |
| 28-Sep-2017  | 01:00:00, | NaN |
| 28-Sep-2017  | 01:15:00, | NaN |
| 28-Sep-2017  | 01:30:00, | NaN |
| 28-Sep-2017  | 01:45:00, | NaN |
| 28-Sep-2017  | 02:00:00, | NaN |
| 28-Sep-2017  | 02:15:00, | NaN |
| 28-Sep-2017  | 02:30:00, | NaN |
| 28-Sep-2017  | 02:45:00, | NaN |
| 28-Sep-2017  | 03:00:00, | NaN |
| 28-Sep-2017  | 03:15:00, | NaN |
| 28-Sep-2017  | 03:30:00, | NaN |

|             |           |     |
|-------------|-----------|-----|
| 28-Sep-2017 | 03:45:00, | NaN |
| 28-Sep-2017 | 04:00:00, | NaN |
| 28-Sep-2017 | 04:15:00, | NaN |
| 28-Sep-2017 | 04:30:00, | NaN |
| 28-Sep-2017 | 04:45:00, | NaN |
| 28-Sep-2017 | 05:00:00, | NaN |
| 28-Sep-2017 | 05:15:00, | NaN |
| 28-Sep-2017 | 05:30:00, | NaN |
| 28-Sep-2017 | 05:45:00, | NaN |
| 28-Sep-2017 | 06:00:00, | NaN |
| 28-Sep-2017 | 06:15:00, | NaN |
| 28-Sep-2017 | 06:30:00, | NaN |
| 28-Sep-2017 | 06:45:00, | NaN |
| 28-Sep-2017 | 07:00:00, | NaN |
| 28-Sep-2017 | 07:15:00, | NaN |
| 28-Sep-2017 | 07:30:00, | NaN |
| 28-Sep-2017 | 07:45:00, | NaN |
| 28-Sep-2017 | 08:00:00, | NaN |
| 28-Sep-2017 | 08:15:00, | NaN |
| 28-Sep-2017 | 08:30:00, | NaN |
| 28-Sep-2017 | 08:45:00, | NaN |
| 28-Sep-2017 | 09:00:00, | NaN |
| 28-Sep-2017 | 09:15:00, | NaN |
| 28-Sep-2017 | 09:30:00, | NaN |
| 28-Sep-2017 | 09:45:00, | NaN |
| 28-Sep-2017 | 10:00:00, | NaN |
| 28-Sep-2017 | 10:15:00, | NaN |
| 28-Sep-2017 | 10:30:00, | NaN |
| 28-Sep-2017 | 10:45:00, | NaN |
| 28-Sep-2017 | 11:00:00, | NaN |
| 28-Sep-2017 | 11:15:00, | NaN |
| 28-Sep-2017 | 11:30:00, | NaN |
| 28-Sep-2017 | 11:45:00, | NaN |
| 28-Sep-2017 | 12:00:00, | NaN |
| 28-Sep-2017 | 12:15:00, | NaN |
| 28-Sep-2017 | 12:30:00, | NaN |
| 28-Sep-2017 | 12:45:00, | NaN |
| 28-Sep-2017 | 13:00:00, | NaN |
| 28-Sep-2017 | 13:15:00, | NaN |
| 28-Sep-2017 | 13:30:00, | NaN |
| 28-Sep-2017 | 13:45:00, | NaN |
| 28-Sep-2017 | 14:00:00, | NaN |
| 28-Sep-2017 | 14:15:00, | NaN |
| 28-Sep-2017 | 14:30:00, | NaN |
| 28-Sep-2017 | 14:45:00, | NaN |
| 28-Sep-2017 | 15:00:00, | NaN |
| 28-Sep-2017 | 15:15:00, | NaN |
| 28-Sep-2017 | 15:30:00, | NaN |
| 28-Sep-2017 | 15:45:00, | NaN |
| 28-Sep-2017 | 16:00:00, | NaN |
| 28-Sep-2017 | 16:15:00, | NaN |
| 28-Sep-2017 | 16:30:00, | NaN |
| 28-Sep-2017 | 16:45:00, | NaN |
| 28-Sep-2017 | 17:00:00, | NaN |
| 28-Sep-2017 | 17:15:00, | NaN |
| 28-Sep-2017 | 17:30:00, | NaN |
| 28-Sep-2017 | 17:45:00, | NaN |
| 28-Sep-2017 | 18:00:00, | NaN |
| 28-Sep-2017 | 18:15:00, | NaN |
| 28-Sep-2017 | 18:30:00, | NaN |
| 28-Sep-2017 | 18:45:00, | NaN |
| 28-Sep-2017 | 19:00:00, | NaN |
| 28-Sep-2017 | 19:15:00, | NaN |
| 28-Sep-2017 | 19:30:00, | NaN |

|              |           |     |
|--------------|-----------|-----|
| 28-Sep-2017  | 19:45:00, | NaN |
| 28-Sep-2017  | 20:00:00, | NaN |
| 28-Sep-2017  | 20:15:00, | NaN |
| 28-Sep-2017  | 20:30:00, | NaN |
| 28-Sep-2017  | 20:45:00, | NaN |
| 28-Sep-2017  | 21:00:00, | NaN |
| 28-Sep-2017  | 21:15:00, | NaN |
| 28-Sep-2017  | 21:30:00, | NaN |
| 28-Sep-2017  | 21:45:00, | NaN |
| 28-Sep-2017  | 22:00:00, | NaN |
| 28-Sep-2017  | 22:15:00, | NaN |
| 28-Sep-2017  | 22:30:00, | NaN |
| 28-Sep-2017  | 22:45:00, | NaN |
| 28-Sep-2017  | 23:00:00, | NaN |
| 28-Sep-2017  | 23:15:00, | NaN |
| 28-Sep-2017  | 23:30:00, | NaN |
| 28-Sep-2017  | 23:45:00, | NaN |
| 29-Sep-2017, |           | NaN |
| 29-Sep-2017  | 00:15:00, | NaN |
| 29-Sep-2017  | 00:30:00, | NaN |
| 29-Sep-2017  | 00:45:00, | NaN |
| 29-Sep-2017  | 01:00:00, | NaN |
| 29-Sep-2017  | 01:15:00, | NaN |
| 29-Sep-2017  | 01:30:00, | NaN |
| 29-Sep-2017  | 01:45:00, | NaN |
| 29-Sep-2017  | 02:00:00, | NaN |
| 29-Sep-2017  | 02:15:00, | NaN |
| 29-Sep-2017  | 02:30:00, | NaN |
| 29-Sep-2017  | 02:45:00, | NaN |
| 29-Sep-2017  | 03:00:00, | NaN |
| 29-Sep-2017  | 03:15:00, | NaN |
| 29-Sep-2017  | 03:30:00, | NaN |
| 29-Sep-2017  | 03:45:00, | NaN |
| 29-Sep-2017  | 04:00:00, | NaN |
| 29-Sep-2017  | 04:15:00, | NaN |
| 29-Sep-2017  | 04:30:00, | NaN |
| 29-Sep-2017  | 04:45:00, | NaN |
| 29-Sep-2017  | 05:00:00, | NaN |
| 29-Sep-2017  | 05:15:00, | NaN |
| 29-Sep-2017  | 05:30:00, | NaN |
| 29-Sep-2017  | 05:45:00, | NaN |
| 29-Sep-2017  | 06:00:00, | NaN |
| 29-Sep-2017  | 06:15:00, | NaN |
| 29-Sep-2017  | 06:30:00, | NaN |
| 29-Sep-2017  | 06:45:00, | NaN |
| 29-Sep-2017  | 07:00:00, | NaN |
| 29-Sep-2017  | 07:15:00, | NaN |
| 29-Sep-2017  | 07:30:00, | NaN |
| 29-Sep-2017  | 07:45:00, | NaN |
| 29-Sep-2017  | 08:00:00, | NaN |
| 29-Sep-2017  | 08:15:00, | NaN |
| 29-Sep-2017  | 08:30:00, | NaN |
| 29-Sep-2017  | 08:45:00, | NaN |
| 29-Sep-2017  | 09:00:00, | NaN |
| 29-Sep-2017  | 09:15:00, | NaN |
| 29-Sep-2017  | 09:30:00, | NaN |
| 29-Sep-2017  | 09:45:00, | NaN |
| 29-Sep-2017  | 10:00:00, | NaN |
| 29-Sep-2017  | 10:15:00, | NaN |
| 29-Sep-2017  | 10:30:00, | NaN |
| 29-Sep-2017  | 10:45:00, | NaN |
| 29-Sep-2017  | 11:00:00, | NaN |
| 29-Sep-2017  | 11:15:00, | NaN |
| 29-Sep-2017  | 11:30:00, | NaN |

29-Sep-2017 11:45:00, NaN  
29-Sep-2017 12:00:00, NaN  
29-Sep-2017 12:15:00, NaN  
29-Sep-2017 12:30:00, NaN  
29-Sep-2017 12:45:00, NaN  
29-Sep-2017 13:00:00, NaN  
29-Sep-2017 13:15:00, NaN  
29-Sep-2017 13:30:00, NaN  
29-Sep-2017 13:45:00, NaN  
29-Sep-2017 14:00:00, NaN  
29-Sep-2017 14:15:00, NaN  
29-Sep-2017 14:30:00, NaN  
29-Sep-2017 14:45:00, NaN  
29-Sep-2017 15:00:00, NaN  
29-Sep-2017 15:15:00, NaN  
29-Sep-2017 15:30:00, NaN  
29-Sep-2017 15:45:00, NaN  
29-Sep-2017 16:00:00, NaN  
29-Sep-2017 16:15:00, NaN  
29-Sep-2017 16:30:00, NaN  
29-Sep-2017 16:45:00, NaN  
29-Sep-2017 17:00:00, NaN  
29-Sep-2017 17:15:00, NaN  
29-Sep-2017 17:30:00, NaN  
29-Sep-2017 17:45:00, NaN  
29-Sep-2017 18:00:00, NaN  
29-Sep-2017 18:15:00, NaN  
29-Sep-2017 18:30:00, NaN  
29-Sep-2017 18:45:00, NaN  
29-Sep-2017 19:00:00, NaN  
29-Sep-2017 19:15:00, NaN  
29-Sep-2017 19:30:00, NaN  
29-Sep-2017 19:45:00, NaN  
29-Sep-2017 20:00:00, NaN  
29-Sep-2017 20:15:00, NaN  
29-Sep-2017 20:30:00, NaN  
29-Sep-2017 20:45:00, NaN  
29-Sep-2017 21:00:00, NaN  
29-Sep-2017 21:15:00, NaN  
29-Sep-2017 21:30:00, NaN  
29-Sep-2017 21:45:00, NaN  
29-Sep-2017 22:00:00, NaN  
29-Sep-2017 22:15:00, NaN  
29-Sep-2017 22:30:00, NaN  
29-Sep-2017 22:45:00, NaN  
29-Sep-2017 23:00:00, NaN  
29-Sep-2017 23:15:00, NaN  
29-Sep-2017 23:30:00, NaN  
29-Sep-2017 23:45:00, NaN  
30-Sep-2017, NaN  
30-Sep-2017 00:15:00, NaN  
30-Sep-2017 00:30:00, NaN  
30-Sep-2017 00:45:00, NaN  
30-Sep-2017 01:00:00, NaN  
30-Sep-2017 01:15:00, NaN  
30-Sep-2017 01:30:00, NaN  
30-Sep-2017 01:45:00, NaN  
30-Sep-2017 02:00:00, NaN  
30-Sep-2017 02:15:00, NaN  
30-Sep-2017 02:30:00, NaN  
30-Sep-2017 02:45:00, NaN  
30-Sep-2017 03:00:00, NaN  
30-Sep-2017 03:15:00, NaN  
30-Sep-2017 03:30:00, NaN

|             |           |     |
|-------------|-----------|-----|
| 30-Sep-2017 | 03:45:00, | NaN |
| 30-Sep-2017 | 04:00:00, | NaN |
| 30-Sep-2017 | 04:15:00, | NaN |
| 30-Sep-2017 | 04:30:00, | NaN |
| 30-Sep-2017 | 04:45:00, | NaN |
| 30-Sep-2017 | 05:00:00, | NaN |
| 30-Sep-2017 | 05:15:00, | NaN |
| 30-Sep-2017 | 05:30:00, | NaN |
| 30-Sep-2017 | 05:45:00, | NaN |
| 30-Sep-2017 | 06:00:00, | NaN |
| 30-Sep-2017 | 06:15:00, | NaN |
| 30-Sep-2017 | 06:30:00, | NaN |
| 30-Sep-2017 | 06:45:00, | NaN |
| 30-Sep-2017 | 07:00:00, | NaN |
| 30-Sep-2017 | 07:15:00, | NaN |
| 30-Sep-2017 | 07:30:00, | NaN |
| 30-Sep-2017 | 07:45:00, | NaN |
| 30-Sep-2017 | 08:00:00, | NaN |
| 30-Sep-2017 | 08:15:00, | NaN |
| 30-Sep-2017 | 08:30:00, | NaN |
| 30-Sep-2017 | 08:45:00, | NaN |
| 30-Sep-2017 | 09:00:00, | NaN |
| 30-Sep-2017 | 09:15:00, | NaN |
| 30-Sep-2017 | 09:30:00, | NaN |
| 30-Sep-2017 | 09:45:00, | NaN |
| 30-Sep-2017 | 10:00:00, | NaN |
| 30-Sep-2017 | 10:15:00, | NaN |
| 30-Sep-2017 | 10:30:00, | NaN |
| 30-Sep-2017 | 10:45:00, | NaN |
| 30-Sep-2017 | 11:00:00, | NaN |
| 30-Sep-2017 | 11:15:00, | NaN |
| 30-Sep-2017 | 11:30:00, | NaN |
| 30-Sep-2017 | 11:45:00, | NaN |
| 30-Sep-2017 | 12:00:00, | NaN |
| 30-Sep-2017 | 12:15:00, | NaN |
| 30-Sep-2017 | 12:30:00, | NaN |
| 30-Sep-2017 | 12:45:00, | NaN |
| 30-Sep-2017 | 13:00:00, | NaN |
| 30-Sep-2017 | 13:15:00, | NaN |
| 30-Sep-2017 | 13:30:00, | NaN |
| 30-Sep-2017 | 13:45:00, | NaN |
| 30-Sep-2017 | 14:00:00, | NaN |
| 30-Sep-2017 | 14:15:00, | NaN |
| 30-Sep-2017 | 14:30:00, | NaN |
| 30-Sep-2017 | 14:45:00, | NaN |
| 30-Sep-2017 | 15:00:00, | NaN |
| 30-Sep-2017 | 15:15:00, | NaN |
| 30-Sep-2017 | 15:30:00, | NaN |
| 30-Sep-2017 | 15:45:00, | NaN |
| 30-Sep-2017 | 16:00:00, | NaN |
| 30-Sep-2017 | 16:15:00, | NaN |
| 30-Sep-2017 | 16:30:00, | NaN |
| 30-Sep-2017 | 16:45:00, | NaN |
| 30-Sep-2017 | 17:00:00, | NaN |
| 30-Sep-2017 | 17:15:00, | NaN |
| 30-Sep-2017 | 17:30:00, | NaN |
| 30-Sep-2017 | 17:45:00, | NaN |
| 30-Sep-2017 | 18:00:00, | NaN |
| 30-Sep-2017 | 18:15:00, | NaN |
| 30-Sep-2017 | 18:30:00, | NaN |
| 30-Sep-2017 | 18:45:00, | NaN |
| 30-Sep-2017 | 19:00:00, | NaN |
| 30-Sep-2017 | 19:15:00, | NaN |
| 30-Sep-2017 | 19:30:00, | NaN |

|              |           |     |
|--------------|-----------|-----|
| 30-Sep-2017  | 19:45:00, | NaN |
| 30-Sep-2017  | 20:00:00, | NaN |
| 30-Sep-2017  | 20:15:00, | NaN |
| 30-Sep-2017  | 20:30:00, | NaN |
| 30-Sep-2017  | 20:45:00, | NaN |
| 30-Sep-2017  | 21:00:00, | NaN |
| 30-Sep-2017  | 21:15:00, | NaN |
| 30-Sep-2017  | 21:30:00, | NaN |
| 30-Sep-2017  | 21:45:00, | NaN |
| 30-Sep-2017  | 22:00:00, | NaN |
| 30-Sep-2017  | 22:15:00, | NaN |
| 30-Sep-2017  | 22:30:00, | NaN |
| 30-Sep-2017  | 22:45:00, | NaN |
| 30-Sep-2017  | 23:00:00, | NaN |
| 30-Sep-2017  | 23:15:00, | NaN |
| 30-Sep-2017  | 23:30:00, | NaN |
| 30-Sep-2017  | 23:45:00, | NaN |
| 01-Oct-2017, |           | NaN |
| 01-Oct-2017  | 00:15:00, | NaN |
| 01-Oct-2017  | 00:30:00, | NaN |
| 01-Oct-2017  | 00:45:00, | NaN |
| 01-Oct-2017  | 01:00:00, | NaN |
| 01-Oct-2017  | 01:15:00, | NaN |
| 01-Oct-2017  | 01:30:00, | NaN |
| 01-Oct-2017  | 01:45:00, | NaN |
| 01-Oct-2017  | 02:00:00, | NaN |
| 01-Oct-2017  | 02:15:00, | NaN |
| 01-Oct-2017  | 02:30:00, | NaN |
| 01-Oct-2017  | 02:45:00, | NaN |
| 01-Oct-2017  | 03:00:00, | NaN |
| 01-Oct-2017  | 03:15:00, | NaN |
| 01-Oct-2017  | 03:30:00, | NaN |
| 01-Oct-2017  | 03:45:00, | NaN |
| 01-Oct-2017  | 04:00:00, | NaN |
| 01-Oct-2017  | 04:15:00, | NaN |
| 01-Oct-2017  | 04:30:00, | NaN |
| 01-Oct-2017  | 04:45:00, | NaN |
| 01-Oct-2017  | 05:00:00, | NaN |
| 01-Oct-2017  | 05:15:00, | NaN |
| 01-Oct-2017  | 05:30:00, | NaN |
| 01-Oct-2017  | 05:45:00, | NaN |
| 01-Oct-2017  | 06:00:00, | NaN |
| 01-Oct-2017  | 06:15:00, | NaN |
| 01-Oct-2017  | 06:30:00, | NaN |
| 01-Oct-2017  | 06:45:00, | NaN |
| 01-Oct-2017  | 07:00:00, | NaN |
| 01-Oct-2017  | 07:15:00, | NaN |
| 01-Oct-2017  | 07:30:00, | NaN |
| 01-Oct-2017  | 07:45:00, | NaN |
| 01-Oct-2017  | 08:00:00, | NaN |
| 01-Oct-2017  | 08:15:00, | NaN |
| 01-Oct-2017  | 08:30:00, | NaN |
| 01-Oct-2017  | 08:45:00, | NaN |
| 01-Oct-2017  | 09:00:00, | NaN |
| 01-Oct-2017  | 09:15:00, | NaN |
| 01-Oct-2017  | 09:30:00, | NaN |
| 01-Oct-2017  | 09:45:00, | NaN |
| 01-Oct-2017  | 10:00:00, | NaN |
| 01-Oct-2017  | 10:15:00, | NaN |
| 01-Oct-2017  | 10:30:00, | NaN |
| 01-Oct-2017  | 10:45:00, | NaN |
| 01-Oct-2017  | 11:00:00, | NaN |
| 01-Oct-2017  | 11:15:00, | NaN |
| 01-Oct-2017  | 11:30:00, | NaN |



|              |           |     |
|--------------|-----------|-----|
| 01-Oct-2017  | 11:45:00, | NaN |
| 01-Oct-2017  | 12:00:00, | NaN |
| 01-Oct-2017  | 12:15:00, | NaN |
| 01-Oct-2017  | 12:30:00, | NaN |
| 01-Oct-2017  | 12:45:00, | NaN |
| 01-Oct-2017  | 13:00:00, | NaN |
| 01-Oct-2017  | 13:15:00, | NaN |
| 01-Oct-2017  | 13:30:00, | NaN |
| 01-Oct-2017  | 13:45:00, | NaN |
| 01-Oct-2017  | 14:00:00, | NaN |
| 01-Oct-2017  | 14:15:00, | NaN |
| 01-Oct-2017  | 14:30:00, | NaN |
| 01-Oct-2017  | 14:45:00, | NaN |
| 01-Oct-2017  | 15:00:00, | NaN |
| 01-Oct-2017  | 15:15:00, | NaN |
| 01-Oct-2017  | 15:30:00, | NaN |
| 01-Oct-2017  | 15:45:00, | NaN |
| 01-Oct-2017  | 16:00:00, | NaN |
| 01-Oct-2017  | 16:15:00, | NaN |
| 01-Oct-2017  | 16:30:00, | NaN |
| 01-Oct-2017  | 16:45:00, | NaN |
| 01-Oct-2017  | 17:00:00, | NaN |
| 01-Oct-2017  | 17:15:00, | NaN |
| 01-Oct-2017  | 17:30:00, | NaN |
| 01-Oct-2017  | 17:45:00, | NaN |
| 01-Oct-2017  | 18:00:00, | NaN |
| 01-Oct-2017  | 18:15:00, | NaN |
| 01-Oct-2017  | 18:30:00, | NaN |
| 01-Oct-2017  | 18:45:00, | NaN |
| 01-Oct-2017  | 19:00:00, | NaN |
| 01-Oct-2017  | 19:15:00, | NaN |
| 01-Oct-2017  | 19:30:00, | NaN |
| 01-Oct-2017  | 19:45:00, | NaN |
| 01-Oct-2017  | 20:00:00, | NaN |
| 01-Oct-2017  | 20:15:00, | NaN |
| 01-Oct-2017  | 20:30:00, | NaN |
| 01-Oct-2017  | 20:45:00, | NaN |
| 01-Oct-2017  | 21:00:00, | NaN |
| 01-Oct-2017  | 21:15:00, | NaN |
| 01-Oct-2017  | 21:30:00, | NaN |
| 01-Oct-2017  | 21:45:00, | NaN |
| 01-Oct-2017  | 22:00:00, | NaN |
| 01-Oct-2017  | 22:15:00, | NaN |
| 01-Oct-2017  | 22:30:00, | NaN |
| 01-Oct-2017  | 22:45:00, | NaN |
| 01-Oct-2017  | 23:00:00, | NaN |
| 01-Oct-2017  | 23:15:00, | NaN |
| 01-Oct-2017  | 23:30:00, | NaN |
| 01-Oct-2017  | 23:45:00, | NaN |
| 02-Oct-2017, | NaN       |     |
| 02-Oct-2017  | 00:15:00, | NaN |
| 02-Oct-2017  | 00:30:00, | NaN |
| 02-Oct-2017  | 00:45:00, | NaN |
| 02-Oct-2017  | 01:00:00, | NaN |
| 02-Oct-2017  | 01:15:00, | NaN |
| 02-Oct-2017  | 01:30:00, | NaN |
| 02-Oct-2017  | 01:45:00, | NaN |
| 02-Oct-2017  | 02:00:00, | NaN |
| 02-Oct-2017  | 02:15:00, | NaN |
| 02-Oct-2017  | 02:30:00, | NaN |
| 02-Oct-2017  | 02:45:00, | NaN |
| 02-Oct-2017  | 03:00:00, | NaN |
| 02-Oct-2017  | 03:15:00, | NaN |
| 02-Oct-2017  | 03:30:00, | NaN |

|             |           |     |
|-------------|-----------|-----|
| 02-Oct-2017 | 03:45:00, | NaN |
| 02-Oct-2017 | 04:00:00, | NaN |
| 02-Oct-2017 | 04:15:00, | NaN |
| 02-Oct-2017 | 04:30:00, | NaN |
| 02-Oct-2017 | 04:45:00, | NaN |
| 02-Oct-2017 | 05:00:00, | NaN |
| 02-Oct-2017 | 05:15:00, | NaN |
| 02-Oct-2017 | 05:30:00, | NaN |
| 02-Oct-2017 | 05:45:00, | NaN |
| 02-Oct-2017 | 06:00:00, | NaN |
| 02-Oct-2017 | 06:15:00, | NaN |
| 02-Oct-2017 | 06:30:00, | NaN |
| 02-Oct-2017 | 06:45:00, | NaN |
| 02-Oct-2017 | 07:00:00, | NaN |
| 02-Oct-2017 | 07:15:00, | NaN |
| 02-Oct-2017 | 07:30:00, | NaN |
| 02-Oct-2017 | 07:45:00, | NaN |
| 02-Oct-2017 | 08:00:00, | NaN |
| 02-Oct-2017 | 08:15:00, | NaN |
| 02-Oct-2017 | 08:30:00, | NaN |
| 02-Oct-2017 | 08:45:00, | NaN |
| 02-Oct-2017 | 09:00:00, | NaN |
| 02-Oct-2017 | 09:15:00, | NaN |
| 02-Oct-2017 | 09:30:00, | NaN |
| 02-Oct-2017 | 09:45:00, | NaN |
| 02-Oct-2017 | 10:00:00, | NaN |
| 02-Oct-2017 | 10:15:00, | NaN |
| 02-Oct-2017 | 10:30:00, | NaN |
| 02-Oct-2017 | 10:45:00, | NaN |
| 02-Oct-2017 | 11:00:00, | NaN |
| 02-Oct-2017 | 11:15:00, | NaN |
| 02-Oct-2017 | 11:30:00, | NaN |
| 02-Oct-2017 | 11:45:00, | NaN |
| 02-Oct-2017 | 12:00:00, | NaN |
| 02-Oct-2017 | 12:15:00, | NaN |
| 02-Oct-2017 | 12:30:00, | NaN |
| 02-Oct-2017 | 12:45:00, | NaN |
| 02-Oct-2017 | 13:00:00, | NaN |
| 02-Oct-2017 | 13:15:00, | NaN |
| 02-Oct-2017 | 13:30:00, | NaN |
| 02-Oct-2017 | 13:45:00, | NaN |
| 02-Oct-2017 | 14:00:00, | NaN |
| 02-Oct-2017 | 14:15:00, | NaN |
| 02-Oct-2017 | 14:30:00, | NaN |
| 02-Oct-2017 | 14:45:00, | NaN |
| 02-Oct-2017 | 15:00:00, | NaN |
| 02-Oct-2017 | 15:15:00, | NaN |
| 02-Oct-2017 | 15:30:00, | NaN |
| 02-Oct-2017 | 15:45:00, | NaN |
| 02-Oct-2017 | 16:00:00, | NaN |
| 02-Oct-2017 | 16:15:00, | NaN |
| 02-Oct-2017 | 16:30:00, | NaN |
| 02-Oct-2017 | 16:45:00, | NaN |
| 02-Oct-2017 | 17:00:00, | NaN |
| 02-Oct-2017 | 17:15:00, | NaN |
| 02-Oct-2017 | 17:30:00, | NaN |
| 02-Oct-2017 | 17:45:00, | NaN |
| 02-Oct-2017 | 18:00:00, | NaN |
| 02-Oct-2017 | 18:15:00, | NaN |
| 02-Oct-2017 | 18:30:00, | NaN |
| 02-Oct-2017 | 18:45:00, | NaN |
| 02-Oct-2017 | 19:00:00, | NaN |
| 02-Oct-2017 | 19:15:00, | NaN |
| 02-Oct-2017 | 19:30:00, | NaN |

02-Oct-2017 19:45:00, NaN  
02-Oct-2017 20:00:00, NaN  
02-Oct-2017 20:15:00, NaN  
02-Oct-2017 20:30:00, NaN  
02-Oct-2017 20:45:00, NaN  
02-Oct-2017 21:00:00, NaN  
02-Oct-2017 21:15:00, NaN  
02-Oct-2017 21:30:00, NaN  
02-Oct-2017 21:45:00, NaN  
02-Oct-2017 22:00:00, NaN  
02-Oct-2017 22:15:00, NaN  
02-Oct-2017 22:30:00, NaN  
02-Oct-2017 22:45:00, NaN  
02-Oct-2017 23:00:00, NaN  
02-Oct-2017 23:15:00, NaN  
02-Oct-2017 23:30:00, NaN  
02-Oct-2017 23:45:00, NaN  
03-Oct-2017, NaN  
03-Oct-2017 00:15:00, NaN  
03-Oct-2017 00:30:00, NaN  
03-Oct-2017 00:45:00, NaN  
03-Oct-2017 01:00:00, NaN  
03-Oct-2017 01:15:00, NaN  
03-Oct-2017 01:30:00, NaN  
03-Oct-2017 01:45:00, NaN  
03-Oct-2017 02:00:00, NaN  
03-Oct-2017 02:15:00, NaN  
03-Oct-2017 02:30:00, NaN  
03-Oct-2017 02:45:00, NaN  
03-Oct-2017 03:00:00, NaN  
03-Oct-2017 03:15:00, NaN  
03-Oct-2017 03:30:00, NaN  
03-Oct-2017 03:45:00, NaN  
03-Oct-2017 04:00:00, NaN  
03-Oct-2017 04:15:00, NaN  
03-Oct-2017 04:30:00, NaN  
03-Oct-2017 04:45:00, NaN  
03-Oct-2017 05:00:00, NaN  
03-Oct-2017 05:15:00, NaN  
03-Oct-2017 05:30:00, NaN  
03-Oct-2017 05:45:00, NaN  
03-Oct-2017 06:00:00, NaN  
03-Oct-2017 06:15:00, NaN  
03-Oct-2017 06:30:00, NaN  
03-Oct-2017 06:45:00, NaN  
03-Oct-2017 07:00:00, NaN  
03-Oct-2017 07:15:00, NaN  
03-Oct-2017 07:30:00, NaN  
03-Oct-2017 07:45:00, NaN  
03-Oct-2017 08:00:00, NaN  
03-Oct-2017 08:15:00, NaN  
03-Oct-2017 08:30:00, NaN  
03-Oct-2017 08:45:00, NaN  
03-Oct-2017 09:00:00, NaN  
03-Oct-2017 09:15:00, NaN  
03-Oct-2017 09:30:00, NaN  
03-Oct-2017 09:45:00, NaN  
03-Oct-2017 10:00:00, NaN  
03-Oct-2017 10:15:00, NaN  
03-Oct-2017 10:30:00, NaN  
03-Oct-2017 10:45:00, NaN  
03-Oct-2017 11:00:00, NaN  
03-Oct-2017 11:15:00, NaN  
03-Oct-2017 11:30:00, NaN

03-Oct-2017 11:45:00, NaN  
03-Oct-2017 12:00:00, NaN  
03-Oct-2017 12:15:00, NaN  
03-Oct-2017 12:30:00, NaN  
03-Oct-2017 12:45:00, NaN  
03-Oct-2017 13:00:00, NaN  
03-Oct-2017 13:15:00, NaN  
03-Oct-2017 13:30:00, NaN  
03-Oct-2017 13:45:00, NaN  
03-Oct-2017 14:00:00, NaN  
03-Oct-2017 14:15:00, NaN  
03-Oct-2017 14:30:00, NaN  
03-Oct-2017 14:45:00, NaN  
03-Oct-2017 15:00:00, NaN  
03-Oct-2017 15:15:00, NaN  
03-Oct-2017 15:30:00, NaN  
03-Oct-2017 15:45:00, NaN  
03-Oct-2017 16:00:00, NaN  
03-Oct-2017 16:15:00, NaN  
03-Oct-2017 16:30:00, NaN  
03-Oct-2017 16:45:00, NaN  
03-Oct-2017 17:00:00, NaN  
03-Oct-2017 17:15:00, NaN  
03-Oct-2017 17:30:00, NaN  
03-Oct-2017 17:45:00, NaN  
03-Oct-2017 18:00:00, NaN  
03-Oct-2017 18:15:00, NaN  
03-Oct-2017 18:30:00, NaN  
03-Oct-2017 18:45:00, NaN  
03-Oct-2017 19:00:00, NaN  
03-Oct-2017 19:15:00, NaN  
03-Oct-2017 19:30:00, NaN  
03-Oct-2017 19:45:00, NaN  
03-Oct-2017 20:00:00, NaN  
03-Oct-2017 20:15:00, NaN  
03-Oct-2017 20:30:00, NaN  
03-Oct-2017 20:45:00, NaN  
03-Oct-2017 21:00:00, NaN  
03-Oct-2017 21:15:00, NaN  
03-Oct-2017 21:30:00, NaN  
03-Oct-2017 21:45:00, NaN  
03-Oct-2017 22:00:00, NaN  
03-Oct-2017 22:15:00, NaN  
03-Oct-2017 22:30:00, NaN  
03-Oct-2017 22:45:00, NaN  
03-Oct-2017 23:00:00, NaN  
03-Oct-2017 23:15:00, NaN  
03-Oct-2017 23:30:00, NaN  
03-Oct-2017 23:45:00, NaN  
04-Oct-2017, NaN  
04-Oct-2017 00:15:00, NaN  
04-Oct-2017 00:30:00, NaN  
04-Oct-2017 00:45:00, NaN  
04-Oct-2017 01:00:00, NaN  
04-Oct-2017 01:15:00, NaN  
04-Oct-2017 01:30:00, NaN  
04-Oct-2017 01:45:00, NaN  
04-Oct-2017 02:00:00, NaN  
04-Oct-2017 02:15:00, NaN  
04-Oct-2017 02:30:00, NaN  
04-Oct-2017 02:45:00, NaN  
04-Oct-2017 03:00:00, NaN  
04-Oct-2017 03:15:00, NaN  
04-Oct-2017 03:30:00, NaN

|             |           |     |
|-------------|-----------|-----|
| 04-Oct-2017 | 03:45:00, | NaN |
| 04-Oct-2017 | 04:00:00, | NaN |
| 04-Oct-2017 | 04:15:00, | NaN |
| 04-Oct-2017 | 04:30:00, | NaN |
| 04-Oct-2017 | 04:45:00, | NaN |
| 04-Oct-2017 | 05:00:00, | NaN |
| 04-Oct-2017 | 05:15:00, | NaN |
| 04-Oct-2017 | 05:30:00, | NaN |
| 04-Oct-2017 | 05:45:00, | NaN |
| 04-Oct-2017 | 06:00:00, | NaN |
| 04-Oct-2017 | 06:15:00, | NaN |
| 04-Oct-2017 | 06:30:00, | NaN |
| 04-Oct-2017 | 06:45:00, | NaN |
| 04-Oct-2017 | 07:00:00, | NaN |
| 04-Oct-2017 | 07:15:00, | NaN |
| 04-Oct-2017 | 07:30:00, | NaN |
| 04-Oct-2017 | 07:45:00, | NaN |
| 04-Oct-2017 | 08:00:00, | NaN |
| 04-Oct-2017 | 08:15:00, | NaN |
| 04-Oct-2017 | 08:30:00, | NaN |
| 04-Oct-2017 | 08:45:00, | NaN |
| 04-Oct-2017 | 09:00:00, | NaN |
| 04-Oct-2017 | 09:15:00, | NaN |
| 04-Oct-2017 | 09:30:00, | NaN |
| 04-Oct-2017 | 09:45:00, | NaN |
| 04-Oct-2017 | 10:00:00, | NaN |
| 04-Oct-2017 | 10:15:00, | NaN |
| 04-Oct-2017 | 10:30:00, | NaN |
| 04-Oct-2017 | 10:45:00, | NaN |
| 04-Oct-2017 | 11:00:00, | NaN |
| 04-Oct-2017 | 11:15:00, | NaN |
| 04-Oct-2017 | 11:30:00, | NaN |
| 04-Oct-2017 | 11:45:00, | NaN |
| 04-Oct-2017 | 12:00:00, | NaN |
| 04-Oct-2017 | 12:15:00, | NaN |
| 04-Oct-2017 | 12:30:00, | NaN |
| 04-Oct-2017 | 12:45:00, | NaN |
| 04-Oct-2017 | 13:00:00, | NaN |
| 04-Oct-2017 | 13:15:00, | NaN |
| 04-Oct-2017 | 13:30:00, | NaN |
| 04-Oct-2017 | 13:45:00, | NaN |
| 04-Oct-2017 | 14:00:00, | NaN |
| 04-Oct-2017 | 14:15:00, | NaN |
| 04-Oct-2017 | 14:30:00, | NaN |
| 04-Oct-2017 | 14:45:00, | NaN |
| 04-Oct-2017 | 15:00:00, | NaN |
| 04-Oct-2017 | 15:15:00, | NaN |
| 04-Oct-2017 | 15:30:00, | NaN |
| 04-Oct-2017 | 15:45:00, | NaN |
| 04-Oct-2017 | 16:00:00, | NaN |
| 04-Oct-2017 | 16:15:00, | NaN |
| 04-Oct-2017 | 16:30:00, | NaN |
| 04-Oct-2017 | 16:45:00, | NaN |
| 04-Oct-2017 | 17:00:00, | NaN |
| 04-Oct-2017 | 17:15:00, | NaN |
| 04-Oct-2017 | 17:30:00, | NaN |
| 04-Oct-2017 | 17:45:00, | NaN |
| 04-Oct-2017 | 18:00:00, | NaN |
| 04-Oct-2017 | 18:15:00, | NaN |
| 04-Oct-2017 | 18:30:00, | NaN |
| 04-Oct-2017 | 18:45:00, | NaN |
| 04-Oct-2017 | 19:00:00, | NaN |
| 04-Oct-2017 | 19:15:00, | NaN |
| 04-Oct-2017 | 19:30:00, | NaN |

04-Oct-2017 19:45:00, NaN  
04-Oct-2017 20:00:00, NaN  
04-Oct-2017 20:15:00, NaN  
04-Oct-2017 20:30:00, NaN  
04-Oct-2017 20:45:00, NaN  
04-Oct-2017 21:00:00, NaN  
04-Oct-2017 21:15:00, NaN  
04-Oct-2017 21:30:00, NaN  
04-Oct-2017 21:45:00, NaN  
04-Oct-2017 22:00:00, NaN  
04-Oct-2017 22:15:00, NaN  
04-Oct-2017 22:30:00, NaN  
04-Oct-2017 22:45:00, NaN  
04-Oct-2017 23:00:00, NaN  
04-Oct-2017 23:15:00, NaN  
04-Oct-2017 23:30:00, NaN  
04-Oct-2017 23:45:00, NaN  
05-Oct-2017, NaN  
05-Oct-2017 00:15:00, NaN  
05-Oct-2017 00:30:00, NaN  
05-Oct-2017 00:45:00, NaN  
05-Oct-2017 01:00:00, NaN  
05-Oct-2017 01:15:00, NaN  
05-Oct-2017 01:30:00, NaN  
05-Oct-2017 01:45:00, NaN  
05-Oct-2017 02:00:00, NaN  
05-Oct-2017 02:15:00, NaN  
05-Oct-2017 02:30:00, NaN  
05-Oct-2017 02:45:00, NaN  
05-Oct-2017 03:00:00, NaN  
05-Oct-2017 03:15:00, NaN  
05-Oct-2017 03:30:00, NaN  
05-Oct-2017 03:45:00, NaN  
05-Oct-2017 04:00:00, NaN  
05-Oct-2017 04:15:00, NaN  
05-Oct-2017 04:30:00, NaN  
05-Oct-2017 04:45:00, NaN  
05-Oct-2017 05:00:00, NaN  
05-Oct-2017 05:15:00, NaN  
05-Oct-2017 05:30:00, NaN  
05-Oct-2017 05:45:00, NaN  
05-Oct-2017 06:00:00, NaN  
05-Oct-2017 06:15:00, NaN  
05-Oct-2017 06:30:00, NaN  
05-Oct-2017 06:45:00, NaN  
05-Oct-2017 07:00:00, NaN  
05-Oct-2017 07:15:00, NaN  
05-Oct-2017 07:30:00, NaN  
05-Oct-2017 07:45:00, NaN  
05-Oct-2017 08:00:00, NaN  
05-Oct-2017 08:15:00, NaN  
05-Oct-2017 08:30:00, NaN  
05-Oct-2017 08:45:00, NaN  
05-Oct-2017 09:00:00, NaN  
05-Oct-2017 09:15:00, NaN  
05-Oct-2017 09:30:00, NaN  
05-Oct-2017 09:45:00, NaN  
05-Oct-2017 10:00:00, NaN  
05-Oct-2017 10:15:00, NaN  
05-Oct-2017 10:30:00, NaN  
05-Oct-2017 10:45:00, NaN  
05-Oct-2017 11:00:00, NaN  
05-Oct-2017 11:15:00, NaN  
05-Oct-2017 11:30:00, NaN

05-Oct-2017 11:45:00, NaN  
05-Oct-2017 12:00:00, NaN  
05-Oct-2017 12:15:00, NaN  
05-Oct-2017 12:30:00, NaN  
05-Oct-2017 12:45:00, NaN  
05-Oct-2017 13:00:00, NaN  
05-Oct-2017 13:15:00, NaN  
05-Oct-2017 13:30:00, NaN  
05-Oct-2017 13:45:00, NaN  
05-Oct-2017 14:00:00, NaN  
05-Oct-2017 14:15:00, NaN  
05-Oct-2017 14:30:00, NaN  
05-Oct-2017 14:45:00, NaN  
05-Oct-2017 15:00:00, NaN  
05-Oct-2017 15:15:00, NaN  
05-Oct-2017 15:30:00, NaN  
05-Oct-2017 15:45:00, NaN  
05-Oct-2017 16:00:00, NaN  
05-Oct-2017 16:15:00, NaN  
05-Oct-2017 16:30:00, NaN  
05-Oct-2017 16:45:00, NaN  
05-Oct-2017 17:00:00, NaN  
05-Oct-2017 17:15:00, NaN  
05-Oct-2017 17:30:00, NaN  
05-Oct-2017 17:45:00, NaN  
05-Oct-2017 18:00:00, NaN  
05-Oct-2017 18:15:00, NaN  
05-Oct-2017 18:30:00, NaN  
05-Oct-2017 18:45:00, NaN  
05-Oct-2017 19:00:00, NaN  
05-Oct-2017 19:15:00, NaN  
05-Oct-2017 19:30:00, NaN  
05-Oct-2017 19:45:00, NaN  
05-Oct-2017 20:00:00, NaN  
05-Oct-2017 20:15:00, NaN  
05-Oct-2017 20:30:00, NaN  
05-Oct-2017 20:45:00, NaN  
05-Oct-2017 21:00:00, NaN  
05-Oct-2017 21:15:00, NaN  
05-Oct-2017 21:30:00, NaN  
05-Oct-2017 21:45:00, NaN  
05-Oct-2017 22:00:00, NaN  
05-Oct-2017 22:15:00, NaN  
05-Oct-2017 22:30:00, NaN  
05-Oct-2017 22:45:00, NaN  
05-Oct-2017 23:00:00, NaN  
05-Oct-2017 23:15:00, NaN  
05-Oct-2017 23:30:00, NaN  
05-Oct-2017 23:45:00, NaN  
06-Oct-2017, NaN  
06-Oct-2017 00:15:00, NaN  
06-Oct-2017 00:30:00, NaN  
06-Oct-2017 00:45:00, NaN  
06-Oct-2017 01:00:00, NaN  
06-Oct-2017 01:15:00, NaN  
06-Oct-2017 01:30:00, NaN  
06-Oct-2017 01:45:00, NaN  
06-Oct-2017 02:00:00, NaN  
06-Oct-2017 02:15:00, NaN  
06-Oct-2017 02:30:00, NaN  
06-Oct-2017 02:45:00, NaN  
06-Oct-2017 03:00:00, NaN  
06-Oct-2017 03:15:00, NaN  
06-Oct-2017 03:30:00, NaN

|             |           |     |
|-------------|-----------|-----|
| 06-Oct-2017 | 03:45:00, | NaN |
| 06-Oct-2017 | 04:00:00, | NaN |
| 06-Oct-2017 | 04:15:00, | NaN |
| 06-Oct-2017 | 04:30:00, | NaN |
| 06-Oct-2017 | 04:45:00, | NaN |
| 06-Oct-2017 | 05:00:00, | NaN |
| 06-Oct-2017 | 05:15:00, | NaN |
| 06-Oct-2017 | 05:30:00, | NaN |
| 06-Oct-2017 | 05:45:00, | NaN |
| 06-Oct-2017 | 06:00:00, | NaN |
| 06-Oct-2017 | 06:15:00, | NaN |
| 06-Oct-2017 | 06:30:00, | NaN |
| 06-Oct-2017 | 06:45:00, | NaN |
| 06-Oct-2017 | 07:00:00, | NaN |
| 06-Oct-2017 | 07:15:00, | NaN |
| 06-Oct-2017 | 07:30:00, | NaN |
| 06-Oct-2017 | 07:45:00, | NaN |
| 06-Oct-2017 | 08:00:00, | NaN |
| 06-Oct-2017 | 08:15:00, | NaN |
| 06-Oct-2017 | 08:30:00, | NaN |
| 06-Oct-2017 | 08:45:00, | NaN |
| 06-Oct-2017 | 09:00:00, | NaN |
| 06-Oct-2017 | 09:15:00, | NaN |
| 06-Oct-2017 | 09:30:00, | NaN |
| 06-Oct-2017 | 09:45:00, | NaN |
| 06-Oct-2017 | 10:00:00, | NaN |
| 06-Oct-2017 | 10:15:00, | NaN |
| 06-Oct-2017 | 10:30:00, | NaN |
| 06-Oct-2017 | 10:45:00, | NaN |
| 06-Oct-2017 | 11:00:00, | NaN |
| 06-Oct-2017 | 11:15:00, | NaN |
| 06-Oct-2017 | 11:30:00, | NaN |
| 06-Oct-2017 | 11:45:00, | NaN |
| 06-Oct-2017 | 12:00:00, | NaN |
| 06-Oct-2017 | 12:15:00, | NaN |
| 06-Oct-2017 | 12:30:00, | NaN |
| 06-Oct-2017 | 12:45:00, | NaN |
| 06-Oct-2017 | 13:00:00, | NaN |
| 06-Oct-2017 | 13:15:00, | NaN |
| 06-Oct-2017 | 13:30:00, | NaN |
| 06-Oct-2017 | 13:45:00, | NaN |
| 06-Oct-2017 | 14:00:00, | NaN |
| 06-Oct-2017 | 14:15:00, | NaN |
| 06-Oct-2017 | 14:30:00, | NaN |
| 06-Oct-2017 | 14:45:00, | NaN |
| 06-Oct-2017 | 15:00:00, | NaN |
| 06-Oct-2017 | 15:15:00, | NaN |
| 06-Oct-2017 | 15:30:00, | NaN |
| 06-Oct-2017 | 15:45:00, | NaN |
| 06-Oct-2017 | 16:00:00, | NaN |
| 06-Oct-2017 | 16:15:00, | NaN |
| 06-Oct-2017 | 16:30:00, | NaN |
| 06-Oct-2017 | 16:45:00, | NaN |
| 06-Oct-2017 | 17:00:00, | NaN |
| 06-Oct-2017 | 17:15:00, | NaN |
| 06-Oct-2017 | 17:30:00, | NaN |
| 06-Oct-2017 | 17:45:00, | NaN |
| 06-Oct-2017 | 18:00:00, | NaN |
| 06-Oct-2017 | 18:15:00, | NaN |
| 06-Oct-2017 | 18:30:00, | NaN |
| 06-Oct-2017 | 18:45:00, | NaN |
| 06-Oct-2017 | 19:00:00, | NaN |
| 06-Oct-2017 | 19:15:00, | NaN |
| 06-Oct-2017 | 19:30:00, | NaN |



06-Oct-2017 19:45:00, NaN  
06-Oct-2017 20:00:00, NaN  
06-Oct-2017 20:15:00, NaN  
06-Oct-2017 20:30:00, NaN  
06-Oct-2017 20:45:00, NaN  
06-Oct-2017 21:00:00, NaN  
06-Oct-2017 21:15:00, NaN  
06-Oct-2017 21:30:00, NaN  
06-Oct-2017 21:45:00, NaN  
06-Oct-2017 22:00:00, NaN  
06-Oct-2017 22:15:00, NaN  
06-Oct-2017 22:30:00, NaN  
06-Oct-2017 22:45:00, NaN  
06-Oct-2017 23:00:00, NaN  
06-Oct-2017 23:15:00, NaN  
06-Oct-2017 23:30:00, NaN  
06-Oct-2017 23:45:00, NaN  
07-Oct-2017, NaN  
07-Oct-2017 00:15:00, NaN  
07-Oct-2017 00:30:00, NaN  
07-Oct-2017 00:45:00, NaN  
07-Oct-2017 01:00:00, NaN  
07-Oct-2017 01:15:00, NaN  
07-Oct-2017 01:30:00, NaN  
07-Oct-2017 01:45:00, NaN  
07-Oct-2017 02:00:00, NaN  
07-Oct-2017 02:15:00, NaN  
07-Oct-2017 02:30:00, NaN  
07-Oct-2017 02:45:00, NaN  
07-Oct-2017 03:00:00, NaN  
07-Oct-2017 03:15:00, NaN  
07-Oct-2017 03:30:00, NaN  
07-Oct-2017 03:45:00, NaN  
07-Oct-2017 04:00:00, NaN  
07-Oct-2017 04:15:00, NaN  
07-Oct-2017 04:30:00, NaN  
07-Oct-2017 04:45:00, NaN  
07-Oct-2017 05:00:00, NaN  
07-Oct-2017 05:15:00, NaN  
07-Oct-2017 05:30:00, NaN  
07-Oct-2017 05:45:00, NaN  
07-Oct-2017 06:00:00, NaN  
07-Oct-2017 06:15:00, NaN  
07-Oct-2017 06:30:00, NaN  
07-Oct-2017 06:45:00, NaN  
07-Oct-2017 07:00:00, NaN  
07-Oct-2017 07:15:00, NaN  
07-Oct-2017 07:30:00, NaN  
07-Oct-2017 07:45:00, NaN  
07-Oct-2017 08:00:00, NaN  
07-Oct-2017 08:15:00, NaN  
07-Oct-2017 08:30:00, NaN  
07-Oct-2017 08:45:00, NaN  
07-Oct-2017 09:00:00, NaN  
07-Oct-2017 09:15:00, NaN  
07-Oct-2017 09:30:00, NaN  
07-Oct-2017 09:45:00, NaN  
07-Oct-2017 10:00:00, NaN  
07-Oct-2017 10:15:00, NaN  
07-Oct-2017 10:30:00, NaN  
07-Oct-2017 10:45:00, NaN  
07-Oct-2017 11:00:00, NaN  
07-Oct-2017 11:15:00, NaN  
07-Oct-2017 11:30:00, NaN

|              |           |          |
|--------------|-----------|----------|
| 07-Oct-2017  | 11:45:00, | NaN      |
| 07-Oct-2017  | 12:00:00, | NaN      |
| 07-Oct-2017  | 12:15:00, | NaN      |
| 07-Oct-2017  | 12:30:00, | NaN      |
| 07-Oct-2017  | 12:45:00, | NaN      |
| 07-Oct-2017  | 13:00:00, | NaN      |
| 07-Oct-2017  | 13:15:00, | NaN      |
| 07-Oct-2017  | 13:30:00, | NaN      |
| 07-Oct-2017  | 13:45:00, | NaN      |
| 07-Oct-2017  | 14:00:00, | NaN      |
| 07-Oct-2017  | 14:15:00, | NaN      |
| 07-Oct-2017  | 14:30:00, | NaN      |
| 07-Oct-2017  | 14:45:00, | NaN      |
| 07-Oct-2017  | 15:00:00, | NaN      |
| 07-Oct-2017  | 15:15:00, | NaN      |
| 07-Oct-2017  | 15:30:00, | NaN      |
| 07-Oct-2017  | 15:45:00, | NaN      |
| 07-Oct-2017  | 16:00:00, | NaN      |
| 07-Oct-2017  | 16:15:00, | NaN      |
| 07-Oct-2017  | 16:30:00, | NaN      |
| 07-Oct-2017  | 16:45:00, | NaN      |
| 07-Oct-2017  | 15:00:00, | 2.17e-01 |
| 07-Oct-2017  | 15:15:00, | 2.17e-01 |
| 07-Oct-2017  | 15:30:00, | 2.17e-01 |
| 07-Oct-2017  | 15:45:00, | 2.17e-01 |
| 07-Oct-2017  | 16:00:00, | 2.17e-01 |
| 07-Oct-2017  | 16:15:00, | 2.17e-01 |
| 07-Oct-2017  | 16:30:00, | 2.17e-01 |
| 07-Oct-2017  | 16:45:00, | 2.17e-01 |
| 07-Oct-2017  | 17:00:00, | 2.17e-01 |
| 07-Oct-2017  | 17:15:00, | 2.17e-01 |
| 07-Oct-2017  | 17:30:00, | 2.17e-01 |
| 07-Oct-2017  | 17:45:00, | 2.17e-01 |
| 07-Oct-2017  | 18:00:00, | 2.17e-01 |
| 07-Oct-2017  | 18:15:00, | 2.17e-01 |
| 07-Oct-2017  | 18:30:00, | 2.17e-01 |
| 07-Oct-2017  | 18:45:00, | 2.17e-01 |
| 07-Oct-2017  | 19:00:00, | 2.17e-01 |
| 07-Oct-2017  | 19:15:00, | 2.17e-01 |
| 07-Oct-2017  | 19:30:00, | 2.17e-01 |
| 07-Oct-2017  | 19:45:00, | 2.17e-01 |
| 07-Oct-2017  | 20:00:00, | 2.17e-01 |
| 07-Oct-2017  | 20:15:00, | 2.17e-01 |
| 07-Oct-2017  | 20:30:00, | 2.17e-01 |
| 07-Oct-2017  | 20:45:00, | 2.17e-01 |
| 07-Oct-2017  | 21:00:00, | 2.17e-01 |
| 07-Oct-2017  | 21:15:00, | 2.17e-01 |
| 07-Oct-2017  | 21:30:00, | 2.17e-01 |
| 07-Oct-2017  | 21:45:00, | 2.17e-01 |
| 07-Oct-2017  | 22:00:00, | 2.17e-01 |
| 07-Oct-2017  | 22:15:00, | 2.18e-01 |
| 07-Oct-2017  | 22:30:00, | 2.18e-01 |
| 07-Oct-2017  | 22:45:00, | 2.18e-01 |
| 07-Oct-2017  | 23:00:00, | 2.18e-01 |
| 07-Oct-2017  | 23:15:00, | 2.18e-01 |
| 07-Oct-2017  | 23:30:00, | 2.18e-01 |
| 07-Oct-2017  | 23:45:00, | 2.18e-01 |
| 08-Oct-2017, |           | 2.18e-01 |
| 08-Oct-2017  | 00:15:00, | 2.18e-01 |
| 08-Oct-2017  | 00:30:00, | 2.18e-01 |
| 08-Oct-2017  | 00:45:00, | 2.18e-01 |
| 08-Oct-2017  | 01:00:00, | 2.18e-01 |
| 08-Oct-2017  | 01:15:00, | 2.18e-01 |
| 08-Oct-2017  | 01:30:00, | 2.18e-01 |

08-Oct-2017 01:45:00, 2.18e-01  
08-Oct-2017 02:00:00, 2.18e-01  
08-Oct-2017 02:15:00, 2.18e-01  
08-Oct-2017 02:30:00, 2.18e-01  
08-Oct-2017 02:45:00, 2.18e-01  
08-Oct-2017 03:00:00, 2.18e-01  
08-Oct-2017 03:15:00, 2.18e-01  
08-Oct-2017 03:30:00, 2.18e-01  
08-Oct-2017 03:45:00, 2.18e-01  
08-Oct-2017 04:00:00, 2.18e-01  
08-Oct-2017 04:15:00, 2.18e-01  
08-Oct-2017 04:30:00, 2.18e-01  
08-Oct-2017 04:45:00, 2.18e-01  
08-Oct-2017 05:00:00, 2.18e-01  
08-Oct-2017 05:15:00, 2.18e-01  
08-Oct-2017 05:30:00, 2.18e-01  
08-Oct-2017 05:45:00, 2.18e-01  
08-Oct-2017 06:00:00, 2.18e-01  
08-Oct-2017 06:15:00, 2.18e-01  
08-Oct-2017 06:30:00, 2.18e-01  
08-Oct-2017 06:45:00, 2.18e-01  
08-Oct-2017 07:00:00, 2.18e-01  
08-Oct-2017 07:15:00, 2.18e-01  
08-Oct-2017 07:30:00, 2.18e-01  
08-Oct-2017 07:45:00, 2.18e-01  
08-Oct-2017 08:00:00, 2.18e-01  
08-Oct-2017 08:15:00, 2.17e-01  
08-Oct-2017 08:30:00, 2.18e-01  
08-Oct-2017 08:45:00, 2.18e-01  
08-Oct-2017 09:00:00, 2.18e-01  
08-Oct-2017 09:15:00, 2.18e-01  
08-Oct-2017 09:30:00, 2.17e-01  
08-Oct-2017 09:45:00, 2.17e-01  
08-Oct-2017 10:00:00, 2.18e-01  
08-Oct-2017 10:15:00, 2.17e-01  
08-Oct-2017 10:30:00, 2.17e-01  
08-Oct-2017 10:45:00, 2.17e-01  
08-Oct-2017 11:00:00, 2.17e-01  
08-Oct-2017 11:15:00, 2.17e-01  
08-Oct-2017 11:30:00, 2.17e-01  
08-Oct-2017 11:45:00, 2.18e-01  
08-Oct-2017 12:00:00, 2.17e-01  
08-Oct-2017 12:15:00, 2.17e-01  
08-Oct-2017 12:30:00, 2.17e-01  
08-Oct-2017 12:45:00, 2.17e-01  
08-Oct-2017 13:00:00, 2.17e-01  
08-Oct-2017 13:15:00, 2.17e-01  
08-Oct-2017 14:00:00, 2.17e-01  
08-Oct-2017 15:00:00, 2.17e-01  
08-Oct-2017 16:00:00, 2.17e-01  
08-Oct-2017 17:00:00, 2.17e-01  
08-Oct-2017 18:00:00, 2.17e-01  
08-Oct-2017 19:00:00, 2.18e-01  
08-Oct-2017 20:00:00, 2.18e-01  
08-Oct-2017 21:00:00, 2.18e-01  
08-Oct-2017 22:00:00, 2.18e-01  
08-Oct-2017 23:00:00, 2.18e-01  
09-Oct-2017, 2.18e-01  
09-Oct-2017 01:00:00, 2.18e-01  
09-Oct-2017 02:00:00, 2.18e-01  
09-Oct-2017 03:00:00, 2.18e-01  
09-Oct-2017 04:00:00, 2.18e-01  
09-Oct-2017 05:00:00, 2.18e-01  
09-Oct-2017 06:00:00, 2.18e-01

09-Oct-2017 07:00:00, 2.18e-01  
09-Oct-2017 08:00:00, 2.18e-01  
09-Oct-2017 09:00:00, 2.18e-01  
09-Oct-2017 10:00:00, 2.18e-01  
09-Oct-2017 11:00:00, 2.18e-01  
09-Oct-2017 12:00:00, 2.18e-01  
09-Oct-2017 13:00:00, 2.18e-01  
09-Oct-2017 14:00:00, 2.18e-01  
09-Oct-2017 15:00:00, 2.18e-01  
09-Oct-2017 16:00:00, 2.18e-01  
09-Oct-2017 17:00:00, 2.18e-01  
09-Oct-2017 18:00:00, 2.18e-01  
09-Oct-2017 19:00:00, 2.18e-01  
09-Oct-2017 20:00:00, 2.18e-01  
09-Oct-2017 21:00:00, 2.18e-01  
09-Oct-2017 22:00:00, 2.18e-01  
09-Oct-2017 23:00:00, 2.18e-01  
10-Oct-2017, 2.18e-01  
10-Oct-2017 01:00:00, 2.18e-01  
10-Oct-2017 02:00:00, 2.18e-01  
10-Oct-2017 03:00:00, 2.18e-01  
10-Oct-2017 04:00:00, 2.18e-01  
10-Oct-2017 05:00:00, 2.18e-01  
10-Oct-2017 06:00:00, 2.18e-01  
10-Oct-2017 07:00:00, 2.18e-01  
10-Oct-2017 08:00:00, 2.18e-01  
10-Oct-2017 09:00:00, 2.18e-01  
10-Oct-2017 10:00:00, 2.18e-01  
10-Oct-2017 11:00:00, 2.18e-01  
10-Oct-2017 12:00:00, 2.18e-01  
10-Oct-2017 13:00:00, 2.18e-01  
10-Oct-2017 14:00:00, 2.18e-01  
10-Oct-2017 15:00:00, 2.18e-01  
10-Oct-2017 16:00:00, 2.17e-01  
10-Oct-2017 17:00:00, 2.17e-01  
10-Oct-2017 18:00:00, 2.17e-01  
10-Oct-2017 19:00:00, 2.17e-01  
10-Oct-2017 20:00:00, 2.17e-01  
10-Oct-2017 21:00:00, 2.17e-01  
10-Oct-2017 22:00:00, 2.18e-01  
10-Oct-2017 23:00:00, 2.18e-01  
11-Oct-2017, 2.18e-01  
11-Oct-2017 01:00:00, 2.18e-01  
11-Oct-2017 02:00:00, 2.18e-01  
11-Oct-2017 03:00:00, 2.18e-01  
11-Oct-2017 04:00:00, 2.19e-01  
11-Oct-2017 05:00:00, 2.19e-01  
11-Oct-2017 06:00:00, 2.20e-01  
11-Oct-2017 07:00:00, 2.21e-01  
11-Oct-2017 08:00:00, 2.21e-01  
11-Oct-2017 09:00:00, 2.23e-01  
11-Oct-2017 10:00:00, 2.23e-01  
11-Oct-2017 11:00:00, 2.22e-01  
11-Oct-2017 12:00:00, 2.22e-01  
11-Oct-2017 13:00:00, 2.20e-01  
11-Oct-2017 14:00:00, 2.20e-01  
11-Oct-2017 15:00:00, 2.21e-01  
11-Oct-2017 16:00:00, 2.21e-01  
11-Oct-2017 17:00:00, 2.19e-01  
11-Oct-2017 18:00:00, 2.18e-01  
11-Oct-2017 19:00:00, 2.18e-01  
11-Oct-2017 20:00:00, 2.18e-01  
11-Oct-2017 21:00:00, 2.18e-01  
11-Oct-2017 22:00:00, 2.18e-01

11-Oct-2017 23:00:00, 2.18e-01  
12-Oct-2017, 2.18e-01  
12-Oct-2017 01:00:00, 2.18e-01  
12-Oct-2017 02:00:00, 2.18e-01  
12-Oct-2017 03:00:00, 2.18e-01  
12-Oct-2017 04:00:00, 2.19e-01  
12-Oct-2017 05:00:00, 2.19e-01  
12-Oct-2017 06:00:00, 2.19e-01  
12-Oct-2017 07:00:00, 2.20e-01  
12-Oct-2017 08:00:00, 2.19e-01  
12-Oct-2017 09:00:00, 2.18e-01  
12-Oct-2017 10:00:00, 2.18e-01  
12-Oct-2017 11:00:00, 2.18e-01  
12-Oct-2017 12:00:00, 2.18e-01  
12-Oct-2017 13:00:00, 2.18e-01  
12-Oct-2017 14:00:00, 2.18e-01  
12-Oct-2017 15:00:00, 2.18e-01  
12-Oct-2017 16:00:00, 2.18e-01  
12-Oct-2017 17:00:00, 2.18e-01  
12-Oct-2017 18:00:00, 2.18e-01  
12-Oct-2017 19:00:00, 2.18e-01  
12-Oct-2017 20:00:00, 2.18e-01  
12-Oct-2017 21:00:00, 2.18e-01  
12-Oct-2017 22:00:00, 2.19e-01  
12-Oct-2017 23:00:00, 2.19e-01  
13-Oct-2017, 2.19e-01  
13-Oct-2017 01:00:00, 2.19e-01  
13-Oct-2017 02:00:00, 2.19e-01  
13-Oct-2017 03:00:00, 2.19e-01  
13-Oct-2017 04:00:00, 2.20e-01  
13-Oct-2017 05:00:00, 2.20e-01  
13-Oct-2017 06:00:00, 2.20e-01  
13-Oct-2017 07:00:00, 2.20e-01  
13-Oct-2017 08:00:00, 2.20e-01  
13-Oct-2017 09:00:00, 2.19e-01  
13-Oct-2017 10:00:00, 2.19e-01  
13-Oct-2017 11:00:00, 2.19e-01  
13-Oct-2017 12:00:00, 2.19e-01  
13-Oct-2017 13:00:00, 2.19e-01  
13-Oct-2017 14:00:00, 2.19e-01  
13-Oct-2017 15:00:00, 2.19e-01  
13-Oct-2017 16:00:00, 2.20e-01  
13-Oct-2017 17:00:00, 2.20e-01  
13-Oct-2017 18:00:00, 2.20e-01  
13-Oct-2017 19:00:00, 2.20e-01  
13-Oct-2017 20:00:00, 2.20e-01  
13-Oct-2017 21:00:00, 2.20e-01  
13-Oct-2017 22:00:00, 2.20e-01  
13-Oct-2017 23:00:00, 2.20e-01  
14-Oct-2017, 2.20e-01  
14-Oct-2017 01:00:00, 2.20e-01  
14-Oct-2017 02:00:00, 2.21e-01  
14-Oct-2017 03:00:00, 2.21e-01  
14-Oct-2017 04:00:00, 2.21e-01  
14-Oct-2017 05:00:00, 2.21e-01  
14-Oct-2017 06:00:00, 2.21e-01  
14-Oct-2017 07:00:00, 2.21e-01  
14-Oct-2017 08:00:00, 2.21e-01  
14-Oct-2017 09:00:00, 2.21e-01  
14-Oct-2017 10:00:00, 2.21e-01  
14-Oct-2017 11:00:00, 2.21e-01  
14-Oct-2017 12:00:00, 2.21e-01  
14-Oct-2017 13:00:00, 2.21e-01  
14-Oct-2017 14:00:00, 2.21e-01

14-Oct-2017 15:00:00, 2.21e-01  
14-Oct-2017 16:00:00, 2.21e-01  
14-Oct-2017 17:00:00, 2.21e-01  
14-Oct-2017 18:00:00, 2.21e-01  
14-Oct-2017 19:00:00, 2.21e-01  
14-Oct-2017 20:00:00, 2.21e-01  
14-Oct-2017 21:00:00, 2.21e-01  
14-Oct-2017 22:00:00, 2.21e-01  
14-Oct-2017 23:00:00, 2.21e-01  
15-Oct-2017, 2.22e-01  
15-Oct-2017 01:00:00, 2.22e-01  
15-Oct-2017 02:00:00, 2.22e-01  
15-Oct-2017 03:00:00, 2.21e-01  
15-Oct-2017 04:00:00, 2.21e-01  
15-Oct-2017 05:00:00, 2.21e-01  
15-Oct-2017 06:00:00, 2.21e-01  
15-Oct-2017 07:00:00, 2.21e-01  
15-Oct-2017 08:00:00, 2.21e-01  
15-Oct-2017 09:00:00, 2.21e-01  
15-Oct-2017 10:00:00, 2.21e-01  
15-Oct-2017 11:00:00, 2.21e-01  
15-Oct-2017 12:00:00, 2.21e-01  
15-Oct-2017 13:00:00, 2.21e-01  
15-Oct-2017 14:00:00, 2.21e-01  
15-Oct-2017 15:00:00, 2.21e-01  
15-Oct-2017 16:00:00, 2.21e-01  
15-Oct-2017 17:00:00, 2.21e-01  
15-Oct-2017 18:00:00, 2.21e-01  
15-Oct-2017 19:00:00, 2.21e-01  
15-Oct-2017 20:00:00, 2.21e-01  
15-Oct-2017 21:00:00, 2.22e-01  
15-Oct-2017 22:00:00, 2.22e-01  
15-Oct-2017 23:00:00, 2.22e-01  
16-Oct-2017, 2.22e-01  
16-Oct-2017 01:00:00, 2.22e-01  
16-Oct-2017 02:00:00, 2.22e-01  
16-Oct-2017 03:00:00, 2.22e-01  
16-Oct-2017 04:00:00, 2.21e-01  
16-Oct-2017 05:00:00, 2.21e-01  
16-Oct-2017 06:00:00, 2.21e-01  
16-Oct-2017 07:00:00, 2.21e-01  
16-Oct-2017 08:00:00, 2.21e-01  
16-Oct-2017 09:00:00, 2.21e-01  
16-Oct-2017 10:00:00, 2.21e-01  
16-Oct-2017 11:00:00, 2.22e-01  
16-Oct-2017 12:00:00, 2.22e-01  
16-Oct-2017 13:00:00, 2.22e-01  
16-Oct-2017 14:00:00, 2.22e-01  
16-Oct-2017 15:00:00, 2.22e-01  
16-Oct-2017 16:00:00, 2.22e-01  
16-Oct-2017 17:00:00, 2.22e-01  
16-Oct-2017 18:00:00, 2.22e-01  
16-Oct-2017 19:00:00, 2.22e-01  
16-Oct-2017 20:00:00, 2.22e-01  
16-Oct-2017 21:00:00, 2.22e-01  
16-Oct-2017 22:00:00, 2.22e-01  
16-Oct-2017 23:00:00, 2.22e-01  
17-Oct-2017, 2.22e-01  
17-Oct-2017 01:00:00, 2.22e-01  
17-Oct-2017 02:00:00, 2.22e-01  
17-Oct-2017 03:00:00, 2.22e-01  
17-Oct-2017 04:00:00, 2.22e-01  
17-Oct-2017 05:00:00, 2.21e-01  
17-Oct-2017 06:00:00, 2.21e-01

17-Oct-2017 07:00:00, 2.21e-01  
17-Oct-2017 08:00:00, 2.21e-01  
17-Oct-2017 09:00:00, 2.21e-01  
17-Oct-2017 10:00:00, 2.22e-01  
17-Oct-2017 11:00:00, 2.22e-01  
17-Oct-2017 12:00:00, 2.22e-01  
17-Oct-2017 13:00:00, 2.22e-01  
17-Oct-2017 14:00:00, 2.22e-01  
17-Oct-2017 15:00:00, 2.22e-01  
17-Oct-2017 16:00:00, 2.22e-01  
17-Oct-2017 17:00:00, 2.22e-01  
17-Oct-2017 18:00:00, 2.22e-01  
17-Oct-2017 19:00:00, 2.22e-01  
17-Oct-2017 20:00:00, 2.22e-01  
17-Oct-2017 21:00:00, 2.22e-01  
17-Oct-2017 22:00:00, 2.23e-01  
17-Oct-2017 23:00:00, 2.23e-01  
18-Oct-2017, 2.23e-01  
18-Oct-2017 01:00:00, 2.23e-01  
18-Oct-2017 02:00:00, 2.23e-01  
18-Oct-2017 03:00:00, 2.22e-01  
18-Oct-2017 04:00:00, 2.22e-01  
18-Oct-2017 05:00:00, 2.22e-01  
18-Oct-2017 06:00:00, 2.22e-01  
18-Oct-2017 07:00:00, 2.22e-01  
18-Oct-2017 08:00:00, 2.22e-01  
18-Oct-2017 09:00:00, 2.22e-01  
18-Oct-2017 10:00:00, 2.22e-01  
18-Oct-2017 11:00:00, 2.23e-01  
18-Oct-2017 12:00:00, 2.23e-01  
18-Oct-2017 13:00:00, 2.23e-01  
18-Oct-2017 14:00:00, 2.23e-01  
18-Oct-2017 15:00:00, 2.23e-01  
18-Oct-2017 16:00:00, 2.23e-01  
18-Oct-2017 17:00:00, 2.23e-01  
18-Oct-2017 18:00:00, 2.23e-01  
18-Oct-2017 19:00:00, 2.23e-01  
18-Oct-2017 20:00:00, 2.23e-01  
18-Oct-2017 21:00:00, 2.23e-01  
18-Oct-2017 22:00:00, 2.23e-01  
18-Oct-2017 23:00:00, 2.23e-01  
19-Oct-2017, 2.23e-01  
19-Oct-2017 01:00:00, 2.23e-01  
19-Oct-2017 02:00:00, 2.23e-01  
19-Oct-2017 03:00:00, 2.23e-01  
19-Oct-2017 04:00:00, 2.23e-01  
19-Oct-2017 05:00:00, 2.23e-01  
19-Oct-2017 06:00:00, 2.23e-01  
19-Oct-2017 07:00:00, 2.23e-01  
19-Oct-2017 08:00:00, 2.23e-01  
19-Oct-2017 09:00:00, 2.23e-01  
19-Oct-2017 10:00:00, 2.23e-01  
19-Oct-2017 11:00:00, 2.23e-01  
19-Oct-2017 12:00:00, 2.23e-01  
19-Oct-2017 13:00:00, 2.23e-01  
19-Oct-2017 14:00:00, 2.23e-01  
19-Oct-2017 15:00:00, 2.23e-01  
19-Oct-2017 16:00:00, 2.23e-01  
19-Oct-2017 17:00:00, 2.23e-01  
19-Oct-2017 18:00:00, 2.24e-01  
19-Oct-2017 19:00:00, 2.24e-01  
19-Oct-2017 20:00:00, 2.24e-01  
19-Oct-2017 21:00:00, 2.24e-01  
19-Oct-2017 22:00:00, 2.24e-01

19-Oct-2017 23:00:00, 2.24e-01  
20-Oct-2017, 2.24e-01  
20-Oct-2017 01:00:00, 2.24e-01  
20-Oct-2017 02:00:00, 2.24e-01  
20-Oct-2017 03:00:00, 2.24e-01  
20-Oct-2017 04:00:00, 2.24e-01  
20-Oct-2017 05:00:00, 2.24e-01  
20-Oct-2017 06:00:00, 2.24e-01  
20-Oct-2017 07:00:00, 2.24e-01  
20-Oct-2017 08:00:00, 2.24e-01  
20-Oct-2017 09:00:00, 2.24e-01  
20-Oct-2017 10:00:00, 2.24e-01  
20-Oct-2017 11:00:00, 2.25e-01  
20-Oct-2017 12:00:00, 2.24e-01  
20-Oct-2017 13:00:00, 2.25e-01  
20-Oct-2017 14:00:00, 2.25e-01  
20-Oct-2017 15:00:00, 2.25e-01  
20-Oct-2017 16:00:00, 2.25e-01  
20-Oct-2017 17:00:00, 2.25e-01  
20-Oct-2017 18:00:00, 2.25e-01  
20-Oct-2017 19:00:00, 2.25e-01  
20-Oct-2017 20:00:00, 2.25e-01  
20-Oct-2017 21:00:00, 2.25e-01  
20-Oct-2017 22:00:00, 2.25e-01  
20-Oct-2017 23:00:00, 2.25e-01  
21-Oct-2017, 2.25e-01  
21-Oct-2017 01:00:00, 2.25e-01  
21-Oct-2017 02:00:00, 2.25e-01  
21-Oct-2017 03:00:00, 2.25e-01  
21-Oct-2017 04:00:00, 2.25e-01  
21-Oct-2017 05:00:00, 2.25e-01  
21-Oct-2017 06:00:00, 2.25e-01  
21-Oct-2017 07:00:00, 2.25e-01  
21-Oct-2017 08:00:00, 2.25e-01  
21-Oct-2017 09:00:00, 2.25e-01  
21-Oct-2017 10:00:00, 2.25e-01  
21-Oct-2017 11:00:00, 2.25e-01  
21-Oct-2017 12:00:00, 2.25e-01  
21-Oct-2017 13:00:00, 2.25e-01  
21-Oct-2017 14:00:00, 2.25e-01  
21-Oct-2017 15:00:00, 2.25e-01  
21-Oct-2017 16:00:00, 2.25e-01  
21-Oct-2017 17:00:00, 2.25e-01  
21-Oct-2017 18:00:00, 2.25e-01  
21-Oct-2017 19:00:00, 2.25e-01  
21-Oct-2017 20:00:00, 2.25e-01  
21-Oct-2017 21:00:00, 2.26e-01  
21-Oct-2017 22:00:00, 2.26e-01  
21-Oct-2017 23:00:00, 2.26e-01  
22-Oct-2017, 2.26e-01  
22-Oct-2017 01:00:00, 2.26e-01  
22-Oct-2017 02:00:00, 2.26e-01  
22-Oct-2017 03:00:00, 2.26e-01  
22-Oct-2017 04:00:00, 2.26e-01  
22-Oct-2017 05:00:00, 2.26e-01  
22-Oct-2017 06:00:00, 2.26e-01  
22-Oct-2017 07:00:00, 2.26e-01  
22-Oct-2017 08:00:00, 2.26e-01  
22-Oct-2017 09:00:00, 2.26e-01  
22-Oct-2017 10:00:00, 2.26e-01  
22-Oct-2017 11:00:00, 2.26e-01  
22-Oct-2017 12:00:00, 2.26e-01  
22-Oct-2017 13:00:00, 2.26e-01  
22-Oct-2017 14:00:00, 2.26e-01



22-Oct-2017 15:00:00, 2.26e-01  
22-Oct-2017 16:00:00, 2.26e-01  
22-Oct-2017 17:00:00, 2.26e-01  
22-Oct-2017 18:00:00, 2.26e-01  
22-Oct-2017 19:00:00, 2.26e-01  
22-Oct-2017 20:00:00, 2.26e-01  
22-Oct-2017 21:00:00, 2.26e-01  
22-Oct-2017 22:00:00, 2.26e-01  
22-Oct-2017 23:00:00, 2.26e-01  
23-Oct-2017, 2.26e-01  
23-Oct-2017 01:00:00, 2.26e-01  
23-Oct-2017 02:00:00, 2.26e-01  
23-Oct-2017 03:00:00, 2.26e-01  
23-Oct-2017 04:00:00, 2.26e-01  
23-Oct-2017 05:00:00, 2.26e-01  
23-Oct-2017 06:00:00, 2.26e-01  
23-Oct-2017 07:00:00, 2.26e-01  
23-Oct-2017 08:00:00, 2.26e-01  
23-Oct-2017 09:00:00, 2.26e-01  
23-Oct-2017 10:00:00, 2.26e-01  
23-Oct-2017 11:00:00, 2.26e-01  
23-Oct-2017 12:00:00, 2.26e-01  
23-Oct-2017 13:00:00, 2.26e-01  
23-Oct-2017 14:00:00, 2.26e-01  
23-Oct-2017 15:00:00, 2.26e-01  
23-Oct-2017 16:00:00, 2.26e-01  
23-Oct-2017 17:00:00, 2.26e-01  
23-Oct-2017 18:00:00, 2.26e-01  
23-Oct-2017 19:00:00, 2.26e-01  
23-Oct-2017 20:00:00, 2.26e-01  
23-Oct-2017 21:00:00, 2.26e-01  
23-Oct-2017 22:00:00, 2.27e-01  
23-Oct-2017 23:00:00, 2.27e-01  
24-Oct-2017, 2.27e-01  
24-Oct-2017 01:00:00, 2.27e-01  
24-Oct-2017 02:00:00, 2.27e-01  
24-Oct-2017 03:00:00, 2.27e-01  
24-Oct-2017 04:00:00, 2.27e-01  
24-Oct-2017 05:00:00, 2.27e-01  
24-Oct-2017 06:00:00, 2.27e-01  
24-Oct-2017 07:00:00, 2.26e-01  
24-Oct-2017 08:00:00, 2.26e-01  
24-Oct-2017 09:00:00, 2.26e-01  
24-Oct-2017 10:00:00, 2.26e-01  
24-Oct-2017 11:00:00, 2.27e-01  
24-Oct-2017 12:00:00, 2.27e-01  
24-Oct-2017 13:00:00, 2.27e-01  
24-Oct-2017 14:00:00, 2.27e-01  
24-Oct-2017 15:00:00, 2.27e-01  
24-Oct-2017 16:00:00, 2.27e-01  
24-Oct-2017 17:00:00, 2.27e-01  
24-Oct-2017 18:00:00, 2.27e-01  
24-Oct-2017 19:00:00, 2.27e-01  
24-Oct-2017 20:00:00, 2.27e-01  
24-Oct-2017 21:00:00, 2.27e-01  
24-Oct-2017 22:00:00, 2.27e-01  
24-Oct-2017 23:00:00, 2.27e-01  
25-Oct-2017, 2.27e-01  
25-Oct-2017 01:00:00, 2.27e-01  
25-Oct-2017 02:00:00, 2.27e-01  
25-Oct-2017 03:00:00, 2.27e-01  
25-Oct-2017 04:00:00, 2.27e-01  
25-Oct-2017 05:00:00, 2.27e-01  
25-Oct-2017 06:00:00, 2.26e-01

25-Oct-2017 07:00:00, 2.26e-01  
25-Oct-2017 08:00:00, 2.26e-01  
25-Oct-2017 09:00:00, 2.26e-01  
25-Oct-2017 10:00:00, 2.27e-01  
25-Oct-2017 11:00:00, 2.27e-01  
25-Oct-2017 12:00:00, 2.27e-01  
25-Oct-2017 13:00:00, 2.27e-01  
25-Oct-2017 14:00:00, 2.27e-01  
25-Oct-2017 15:00:00, 2.27e-01  
25-Oct-2017 16:00:00, 2.27e-01  
25-Oct-2017 17:00:00, 2.27e-01  
25-Oct-2017 18:00:00, 2.27e-01  
25-Oct-2017 19:00:00, 2.27e-01  
25-Oct-2017 20:00:00, 2.27e-01  
25-Oct-2017 21:00:00, 2.27e-01  
25-Oct-2017 22:00:00, 2.27e-01  
25-Oct-2017 23:00:00, 2.27e-01  
26-Oct-2017, 2.27e-01  
26-Oct-2017 01:00:00, 2.27e-01  
26-Oct-2017 02:00:00, 2.27e-01  
26-Oct-2017 03:00:00, 2.27e-01  
26-Oct-2017 04:00:00, 2.27e-01  
26-Oct-2017 05:00:00, 2.27e-01  
26-Oct-2017 06:00:00, 2.27e-01  
26-Oct-2017 07:00:00, 2.27e-01  
26-Oct-2017 08:00:00, 2.27e-01  
26-Oct-2017 09:00:00, 2.27e-01  
26-Oct-2017 10:00:00, 2.27e-01  
26-Oct-2017 11:00:00, 2.27e-01  
26-Oct-2017 12:00:00, 2.27e-01  
26-Oct-2017 13:00:00, 2.27e-01  
26-Oct-2017 14:00:00, 2.27e-01  
26-Oct-2017 15:00:00, 2.27e-01  
26-Oct-2017 16:00:00, 2.27e-01  
26-Oct-2017 17:00:00, 2.27e-01  
26-Oct-2017 18:00:00, 2.27e-01  
26-Oct-2017 19:00:00, 2.27e-01  
26-Oct-2017 20:00:00, 2.27e-01  
26-Oct-2017 21:00:00, 2.27e-01  
26-Oct-2017 22:00:00, 2.27e-01  
26-Oct-2017 23:00:00, 2.28e-01  
27-Oct-2017, 2.28e-01  
27-Oct-2017 01:00:00, 2.28e-01  
27-Oct-2017 02:00:00, 2.27e-01  
27-Oct-2017 03:00:00, 2.27e-01  
27-Oct-2017 04:00:00, 2.27e-01  
27-Oct-2017 05:00:00, 2.27e-01  
27-Oct-2017 06:00:00, 2.27e-01  
27-Oct-2017 07:00:00, 2.27e-01  
27-Oct-2017 08:00:00, 2.27e-01  
27-Oct-2017 09:00:00, 2.27e-01  
27-Oct-2017 10:00:00, 2.27e-01  
27-Oct-2017 11:00:00, 2.27e-01  
27-Oct-2017 12:00:00, 2.28e-01  
27-Oct-2017 13:00:00, 2.28e-01  
27-Oct-2017 14:00:00, 2.28e-01  
27-Oct-2017 15:00:00, 2.28e-01  
27-Oct-2017 16:00:00, 2.28e-01  
27-Oct-2017 17:00:00, 2.28e-01  
27-Oct-2017 18:00:00, 2.28e-01  
27-Oct-2017 19:00:00, 2.28e-01  
27-Oct-2017 20:00:00, 2.28e-01  
27-Oct-2017 21:00:00, 2.28e-01  
27-Oct-2017 22:00:00, 2.28e-01

27-Oct-2017 23:00:00, 2.28e-01  
28-Oct-2017, 2.28e-01  
28-Oct-2017 01:00:00, 2.28e-01  
28-Oct-2017 02:00:00, 2.28e-01  
28-Oct-2017 03:00:00, 2.28e-01  
28-Oct-2017 04:00:00, 2.28e-01  
28-Oct-2017 05:00:00, 2.28e-01  
28-Oct-2017 06:00:00, 2.28e-01  
28-Oct-2017 07:00:00, 2.28e-01  
28-Oct-2017 08:00:00, 2.28e-01  
28-Oct-2017 09:00:00, 2.28e-01  
28-Oct-2017 10:00:00, 2.28e-01  
28-Oct-2017 11:00:00, 2.28e-01  
28-Oct-2017 12:00:00, 2.28e-01  
28-Oct-2017 13:00:00, 2.28e-01  
28-Oct-2017 14:00:00, 2.28e-01  
28-Oct-2017 15:00:00, 2.28e-01  
28-Oct-2017 16:00:00, 2.28e-01  
28-Oct-2017 17:00:00, 2.28e-01  
28-Oct-2017 18:00:00, 2.28e-01  
28-Oct-2017 19:00:00, 2.28e-01  
28-Oct-2017 20:00:00, 2.28e-01  
28-Oct-2017 21:00:00, 2.28e-01  
28-Oct-2017 22:00:00, 2.28e-01  
28-Oct-2017 23:00:00, 2.28e-01  
29-Oct-2017, 2.28e-01  
29-Oct-2017 01:00:00, 2.28e-01  
29-Oct-2017 02:00:00, 2.28e-01  
29-Oct-2017 03:00:00, 2.28e-01  
29-Oct-2017 04:00:00, 2.28e-01  
29-Oct-2017 05:00:00, 2.28e-01  
29-Oct-2017 06:00:00, 2.27e-01  
29-Oct-2017 07:00:00, 2.27e-01  
29-Oct-2017 08:00:00, 2.27e-01  
29-Oct-2017 09:00:00, 2.27e-01  
29-Oct-2017 10:00:00, 2.28e-01  
29-Oct-2017 11:00:00, 2.28e-01  
29-Oct-2017 12:00:00, 2.28e-01  
29-Oct-2017 13:00:00, 2.28e-01  
29-Oct-2017 14:00:00, 2.28e-01  
29-Oct-2017 15:00:00, 2.28e-01  
29-Oct-2017 16:00:00, 2.28e-01  
29-Oct-2017 17:00:00, 2.28e-01  
29-Oct-2017 18:00:00, 2.28e-01  
29-Oct-2017 19:00:00, 2.28e-01  
29-Oct-2017 20:00:00, 2.28e-01  
29-Oct-2017 21:00:00, 2.28e-01  
29-Oct-2017 22:00:00, 2.28e-01  
29-Oct-2017 23:00:00, 2.28e-01  
30-Oct-2017, 2.28e-01  
30-Oct-2017 01:00:00, 2.28e-01  
30-Oct-2017 02:00:00, 2.28e-01  
30-Oct-2017 03:00:00, 2.28e-01  
30-Oct-2017 04:00:00, 2.28e-01  
30-Oct-2017 05:00:00, 2.28e-01  
30-Oct-2017 06:00:00, 2.28e-01  
30-Oct-2017 07:00:00, 2.28e-01  
30-Oct-2017 08:00:00, 2.28e-01  
30-Oct-2017 09:00:00, 2.28e-01  
30-Oct-2017 10:00:00, 2.28e-01  
30-Oct-2017 11:00:00, 2.28e-01  
30-Oct-2017 12:00:00, 2.28e-01  
30-Oct-2017 13:00:00, 2.28e-01  
30-Oct-2017 14:00:00, 2.28e-01

30-Oct-2017 15:00:00, 2.28e-01  
30-Oct-2017 16:00:00, 2.28e-01  
30-Oct-2017 17:00:00, 2.28e-01  
30-Oct-2017 18:00:00, 2.28e-01  
30-Oct-2017 19:00:00, 2.28e-01  
30-Oct-2017 20:00:00, 2.28e-01  
30-Oct-2017 21:00:00, 2.28e-01  
30-Oct-2017 22:00:00, 2.28e-01  
30-Oct-2017 23:00:00, 2.28e-01  
31-Oct-2017, 2.28e-01  
31-Oct-2017 01:00:00, 2.28e-01  
31-Oct-2017 02:00:00, 2.28e-01  
31-Oct-2017 03:00:00, 2.28e-01  
31-Oct-2017 04:00:00, 2.28e-01  
31-Oct-2017 05:00:00, 2.28e-01  
31-Oct-2017 06:00:00, 2.28e-01  
31-Oct-2017 07:00:00, 2.28e-01  
31-Oct-2017 08:00:00, 2.28e-01  
31-Oct-2017 09:00:00, 2.28e-01  
31-Oct-2017 10:00:00, 2.28e-01  
31-Oct-2017 11:00:00, 2.28e-01  
31-Oct-2017 12:00:00, 2.28e-01  
31-Oct-2017 13:00:00, 2.28e-01  
31-Oct-2017 14:00:00, 2.28e-01  
31-Oct-2017 15:00:00, 2.28e-01  
31-Oct-2017 16:00:00, 2.28e-01  
31-Oct-2017 17:00:00, 2.28e-01  
31-Oct-2017 18:00:00, 2.28e-01  
31-Oct-2017 19:00:00, 2.28e-01  
31-Oct-2017 20:00:00, 2.28e-01  
31-Oct-2017 21:00:00, 2.28e-01  
31-Oct-2017 22:00:00, 2.28e-01  
31-Oct-2017 23:00:00, 2.28e-01  
01-Nov-2017, NaN  
01-Nov-2017 01:00:00, NaN  
01-Nov-2017 02:00:00, NaN  
01-Nov-2017 03:00:00, NaN  
01-Nov-2017 04:00:00, NaN  
01-Nov-2017 05:00:00, NaN  
01-Nov-2017 06:00:00, NaN  
01-Nov-2017 07:00:00, NaN  
01-Nov-2017 08:00:00, NaN  
01-Nov-2017 09:00:00, NaN  
01-Nov-2017 10:00:00, NaN  
01-Nov-2017 11:00:00, NaN  
01-Nov-2017 12:00:00, NaN  
01-Nov-2017 13:00:00, NaN  
01-Nov-2017 14:00:00, NaN  
01-Nov-2017 15:00:00, NaN  
01-Nov-2017 16:00:00, NaN  
01-Nov-2017 17:00:00, NaN  
01-Nov-2017 18:00:00, NaN  
01-Nov-2017 19:00:00, NaN  
01-Nov-2017 20:00:00, NaN  
01-Nov-2017 21:00:00, NaN  
01-Nov-2017 22:00:00, NaN  
01-Nov-2017 23:00:00, NaN  
02-Nov-2017, NaN  
02-Nov-2017 01:00:00, NaN  
02-Nov-2017 02:00:00, NaN  
02-Nov-2017 03:00:00, NaN  
02-Nov-2017 04:00:00, NaN  
02-Nov-2017 05:00:00, NaN  
02-Nov-2017 06:00:00, NaN

|              |           |     |
|--------------|-----------|-----|
| 02-Nov-2017  | 07:00:00, | NaN |
| 02-Nov-2017  | 08:00:00, | NaN |
| 02-Nov-2017  | 09:00:00, | NaN |
| 02-Nov-2017  | 10:00:00, | NaN |
| 02-Nov-2017  | 11:00:00, | NaN |
| 02-Nov-2017  | 12:00:00, | NaN |
| 02-Nov-2017  | 13:00:00, | NaN |
| 02-Nov-2017  | 14:00:00, | NaN |
| 02-Nov-2017  | 15:00:00, | NaN |
| 02-Nov-2017  | 16:00:00, | NaN |
| 02-Nov-2017  | 17:00:00, | NaN |
| 02-Nov-2017  | 18:00:00, | NaN |
| 02-Nov-2017  | 19:00:00, | NaN |
| 02-Nov-2017  | 20:00:00, | NaN |
| 02-Nov-2017  | 21:00:00, | NaN |
| 02-Nov-2017  | 22:00:00, | NaN |
| 02-Nov-2017  | 23:00:00, | NaN |
| 03-Nov-2017, |           | NaN |
| 03-Nov-2017  | 01:00:00, | NaN |
| 03-Nov-2017  | 02:00:00, | NaN |
| 03-Nov-2017  | 03:00:00, | NaN |
| 03-Nov-2017  | 04:00:00, | NaN |
| 03-Nov-2017  | 05:00:00, | NaN |
| 03-Nov-2017  | 06:00:00, | NaN |
| 03-Nov-2017  | 07:00:00, | NaN |
| 03-Nov-2017  | 08:00:00, | NaN |
| 03-Nov-2017  | 09:00:00, | NaN |
| 03-Nov-2017  | 10:00:00, | NaN |
| 03-Nov-2017  | 11:00:00, | NaN |
| 03-Nov-2017  | 12:00:00, | NaN |
| 03-Nov-2017  | 13:00:00, | NaN |
| 03-Nov-2017  | 14:00:00, | NaN |
| 03-Nov-2017  | 15:00:00, | NaN |
| 03-Nov-2017  | 16:00:00, | NaN |
| 03-Nov-2017  | 17:00:00, | NaN |
| 03-Nov-2017  | 18:00:00, | NaN |
| 03-Nov-2017  | 19:00:00, | NaN |
| 03-Nov-2017  | 20:00:00, | NaN |
| 03-Nov-2017  | 21:00:00, | NaN |
| 03-Nov-2017  | 22:00:00, | NaN |
| 03-Nov-2017  | 23:00:00, | NaN |
| 04-Nov-2017, |           | NaN |
| 04-Nov-2017  | 01:00:00, | NaN |
| 04-Nov-2017  | 02:00:00, | NaN |
| 04-Nov-2017  | 03:00:00, | NaN |
| 04-Nov-2017  | 04:00:00, | NaN |
| 04-Nov-2017  | 05:00:00, | NaN |
| 04-Nov-2017  | 06:00:00, | NaN |
| 04-Nov-2017  | 07:00:00, | NaN |
| 04-Nov-2017  | 08:00:00, | NaN |
| 04-Nov-2017  | 09:00:00, | NaN |
| 04-Nov-2017  | 10:00:00, | NaN |
| 04-Nov-2017  | 11:00:00, | NaN |
| 04-Nov-2017  | 12:00:00, | NaN |
| 04-Nov-2017  | 13:00:00, | NaN |
| 04-Nov-2017  | 14:00:00, | NaN |
| 04-Nov-2017  | 15:00:00, | NaN |
| 04-Nov-2017  | 16:00:00, | NaN |
| 04-Nov-2017  | 17:00:00, | NaN |
| 04-Nov-2017  | 18:00:00, | NaN |
| 04-Nov-2017  | 19:00:00, | NaN |
| 04-Nov-2017  | 20:00:00, | NaN |
| 04-Nov-2017  | 21:00:00, | NaN |
| 04-Nov-2017  | 22:00:00, | NaN |

04-Nov-2017 23:00:00, NaN  
05-Nov-2017, NaN  
05-Nov-2017 01:00:00, NaN  
05-Nov-2017 02:00:00, NaN  
05-Nov-2017 03:00:00, NaN  
05-Nov-2017 04:00:00, NaN  
05-Nov-2017 05:00:00, NaN  
05-Nov-2017 06:00:00, NaN  
05-Nov-2017 07:00:00, NaN  
05-Nov-2017 08:00:00, NaN  
05-Nov-2017 09:00:00, NaN  
05-Nov-2017 10:00:00, NaN  
05-Nov-2017 11:00:00, NaN  
05-Nov-2017 12:00:00, NaN  
05-Nov-2017 13:00:00, NaN  
05-Nov-2017 14:00:00, NaN  
05-Nov-2017 15:00:00, NaN  
05-Nov-2017 16:00:00, NaN  
05-Nov-2017 17:00:00, NaN  
05-Nov-2017 18:00:00, NaN  
05-Nov-2017 19:00:00, NaN  
05-Nov-2017 20:00:00, NaN  
05-Nov-2017 21:00:00, NaN  
05-Nov-2017 22:00:00, NaN  
05-Nov-2017 23:00:00, NaN  
06-Nov-2017, NaN  
06-Nov-2017 01:00:00, NaN  
06-Nov-2017 02:00:00, NaN  
06-Nov-2017 03:00:00, NaN  
06-Nov-2017 04:00:00, NaN  
06-Nov-2017 05:00:00, NaN  
06-Nov-2017 06:00:00, NaN  
06-Nov-2017 07:00:00, NaN  
06-Nov-2017 08:00:00, NaN  
06-Nov-2017 09:00:00, NaN  
06-Nov-2017 10:00:00, NaN  
06-Nov-2017 11:00:00, NaN  
06-Nov-2017 12:00:00, NaN  
06-Nov-2017 13:00:00, NaN  
06-Nov-2017 14:00:00, NaN  
06-Nov-2017 15:00:00, NaN  
06-Nov-2017 16:00:00, NaN  
06-Nov-2017 17:00:00, NaN  
06-Nov-2017 18:00:00, NaN  
06-Nov-2017 19:00:00, NaN  
06-Nov-2017 20:00:00, NaN  
06-Nov-2017 21:00:00, NaN  
06-Nov-2017 22:00:00, NaN  
06-Nov-2017 23:00:00, NaN  
07-Nov-2017, NaN  
07-Nov-2017 01:00:00, NaN  
07-Nov-2017 02:00:00, NaN  
07-Nov-2017 03:00:00, NaN  
07-Nov-2017 04:00:00, NaN  
07-Nov-2017 05:00:00, NaN  
07-Nov-2017 06:00:00, NaN  
07-Nov-2017 07:00:00, NaN  
07-Nov-2017 08:00:00, NaN  
07-Nov-2017 09:00:00, NaN  
07-Nov-2017 10:00:00, NaN  
07-Nov-2017 11:00:00, NaN  
07-Nov-2017 12:00:00, NaN  
07-Nov-2017 13:00:00, NaN  
07-Nov-2017 14:00:00, NaN

07-Nov-2017 15:00:00, NaN  
07-Nov-2017 16:00:00, NaN  
07-Nov-2017 17:00:00, NaN  
07-Nov-2017 18:00:00, NaN  
07-Nov-2017 19:00:00, NaN  
07-Nov-2017 20:00:00, NaN  
07-Nov-2017 21:00:00, NaN  
07-Nov-2017 22:00:00, NaN  
07-Nov-2017 23:00:00, NaN  
08-Nov-2017, NaN  
08-Nov-2017 01:00:00, NaN  
08-Nov-2017 02:00:00, NaN  
08-Nov-2017 03:00:00, NaN  
08-Nov-2017 04:00:00, NaN  
08-Nov-2017 05:00:00, NaN  
08-Nov-2017 06:00:00, NaN  
08-Nov-2017 07:00:00, NaN  
08-Nov-2017 08:00:00, NaN  
08-Nov-2017 09:00:00, NaN  
08-Nov-2017 10:00:00, NaN  
08-Nov-2017 11:00:00, NaN  
08-Nov-2017 12:00:00, NaN  
08-Nov-2017 13:00:00, NaN  
08-Nov-2017 14:00:00, NaN  
08-Nov-2017 15:00:00, NaN  
08-Nov-2017 16:00:00, NaN  
08-Nov-2017 17:00:00, NaN  
08-Nov-2017 18:00:00, NaN  
08-Nov-2017 19:00:00, NaN  
08-Nov-2017 20:00:00, NaN  
08-Nov-2017 21:00:00, NaN  
08-Nov-2017 22:00:00, NaN  
08-Nov-2017 23:00:00, NaN  
09-Nov-2017, NaN  
09-Nov-2017 01:00:00, NaN  
09-Nov-2017 02:00:00, NaN  
09-Nov-2017 03:00:00, NaN  
09-Nov-2017 04:00:00, NaN  
09-Nov-2017 05:00:00, NaN  
09-Nov-2017 06:00:00, NaN  
09-Nov-2017 07:00:00, NaN  
09-Nov-2017 08:00:00, NaN  
09-Nov-2017 09:00:00, NaN  
09-Nov-2017 10:00:00, NaN  
09-Nov-2017 11:00:00, NaN  
09-Nov-2017 12:00:00, NaN  
09-Nov-2017 13:00:00, NaN  
09-Nov-2017 14:00:00, NaN  
09-Nov-2017 15:00:00, NaN  
09-Nov-2017 16:00:00, NaN  
09-Nov-2017 17:00:00, NaN  
09-Nov-2017 18:00:00, NaN  
09-Nov-2017 19:00:00, NaN  
09-Nov-2017 20:00:00, NaN  
09-Nov-2017 21:00:00, NaN  
09-Nov-2017 22:00:00, NaN  
09-Nov-2017 23:00:00, NaN  
10-Nov-2017, NaN  
10-Nov-2017 01:00:00, NaN  
10-Nov-2017 02:00:00, NaN  
10-Nov-2017 03:00:00, NaN  
10-Nov-2017 04:00:00, NaN  
10-Nov-2017 05:00:00, NaN  
10-Nov-2017 06:00:00, NaN

|              |           |     |
|--------------|-----------|-----|
| 10-Nov-2017  | 07:00:00, | NaN |
| 10-Nov-2017  | 08:00:00, | NaN |
| 10-Nov-2017  | 09:00:00, | NaN |
| 10-Nov-2017  | 10:00:00, | NaN |
| 10-Nov-2017  | 11:00:00, | NaN |
| 10-Nov-2017  | 12:00:00, | NaN |
| 10-Nov-2017  | 13:00:00, | NaN |
| 10-Nov-2017  | 14:00:00, | NaN |
| 10-Nov-2017  | 15:00:00, | NaN |
| 10-Nov-2017  | 16:00:00, | NaN |
| 10-Nov-2017  | 17:00:00, | NaN |
| 10-Nov-2017  | 18:00:00, | NaN |
| 10-Nov-2017  | 19:00:00, | NaN |
| 10-Nov-2017  | 20:00:00, | NaN |
| 10-Nov-2017  | 21:00:00, | NaN |
| 10-Nov-2017  | 22:00:00, | NaN |
| 10-Nov-2017  | 23:00:00, | NaN |
| 11-Nov-2017, |           | NaN |
| 11-Nov-2017  | 01:00:00, | NaN |
| 11-Nov-2017  | 02:00:00, | NaN |
| 11-Nov-2017  | 03:00:00, | NaN |
| 11-Nov-2017  | 04:00:00, | NaN |
| 11-Nov-2017  | 05:00:00, | NaN |
| 11-Nov-2017  | 06:00:00, | NaN |
| 11-Nov-2017  | 07:00:00, | NaN |
| 11-Nov-2017  | 08:00:00, | NaN |
| 11-Nov-2017  | 09:00:00, | NaN |
| 11-Nov-2017  | 10:00:00, | NaN |
| 11-Nov-2017  | 11:00:00, | NaN |
| 11-Nov-2017  | 12:00:00, | NaN |
| 11-Nov-2017  | 13:00:00, | NaN |
| 11-Nov-2017  | 14:00:00, | NaN |
| 11-Nov-2017  | 15:00:00, | NaN |
| 11-Nov-2017  | 16:00:00, | NaN |
| 11-Nov-2017  | 17:00:00, | NaN |
| 11-Nov-2017  | 18:00:00, | NaN |
| 11-Nov-2017  | 19:00:00, | NaN |
| 11-Nov-2017  | 20:00:00, | NaN |
| 11-Nov-2017  | 21:00:00, | NaN |
| 11-Nov-2017  | 22:00:00, | NaN |
| 11-Nov-2017  | 23:00:00, | NaN |
| 12-Nov-2017, |           | NaN |
| 12-Nov-2017  | 01:00:00, | NaN |
| 12-Nov-2017  | 02:00:00, | NaN |
| 12-Nov-2017  | 03:00:00, | NaN |
| 12-Nov-2017  | 04:00:00, | NaN |
| 12-Nov-2017  | 05:00:00, | NaN |
| 12-Nov-2017  | 06:00:00, | NaN |
| 12-Nov-2017  | 07:00:00, | NaN |
| 12-Nov-2017  | 08:00:00, | NaN |
| 12-Nov-2017  | 09:00:00, | NaN |
| 12-Nov-2017  | 10:00:00, | NaN |
| 12-Nov-2017  | 11:00:00, | NaN |
| 12-Nov-2017  | 12:00:00, | NaN |
| 12-Nov-2017  | 13:00:00, | NaN |
| 12-Nov-2017  | 14:00:00, | NaN |
| 12-Nov-2017  | 15:00:00, | NaN |
| 12-Nov-2017  | 16:00:00, | NaN |
| 12-Nov-2017  | 17:00:00, | NaN |
| 12-Nov-2017  | 18:00:00, | NaN |
| 12-Nov-2017  | 19:00:00, | NaN |
| 12-Nov-2017  | 20:00:00, | NaN |
| 12-Nov-2017  | 21:00:00, | NaN |
| 12-Nov-2017  | 22:00:00, | NaN |



12-Nov-2017 23:00:00, NaN  
13-Nov-2017, NaN  
13-Nov-2017 01:00:00, NaN  
13-Nov-2017 02:00:00, NaN  
13-Nov-2017 03:00:00, NaN  
13-Nov-2017 04:00:00, NaN  
13-Nov-2017 05:00:00, NaN  
13-Nov-2017 06:00:00, NaN  
13-Nov-2017 07:00:00, NaN  
13-Nov-2017 08:00:00, NaN  
13-Nov-2017 09:00:00, NaN  
13-Nov-2017 10:00:00, NaN  
13-Nov-2017 11:00:00, NaN  
13-Nov-2017 12:00:00, NaN  
13-Nov-2017 13:00:00, NaN  
13-Nov-2017 14:00:00, NaN  
13-Nov-2017 15:00:00, NaN  
13-Nov-2017 16:00:00, NaN  
13-Nov-2017 17:00:00, NaN  
13-Nov-2017 18:00:00, NaN  
13-Nov-2017 19:00:00, NaN  
13-Nov-2017 20:00:00, NaN  
13-Nov-2017 21:00:00, NaN  
13-Nov-2017 22:00:00, NaN  
13-Nov-2017 23:00:00, NaN  
14-Nov-2017, NaN  
14-Nov-2017 01:00:00, NaN  
14-Nov-2017 02:00:00, NaN  
14-Nov-2017 03:00:00, NaN  
14-Nov-2017 04:00:00, NaN  
14-Nov-2017 05:00:00, NaN  
14-Nov-2017 06:00:00, NaN  
14-Nov-2017 07:00:00, NaN  
14-Nov-2017 08:00:00, NaN  
14-Nov-2017 09:00:00, NaN  
14-Nov-2017 10:00:00, NaN  
14-Nov-2017 11:00:00, NaN  
14-Nov-2017 12:00:00, NaN  
14-Nov-2017 13:00:00, NaN  
14-Nov-2017 14:00:00, NaN  
14-Nov-2017 15:00:00, NaN  
14-Nov-2017 16:00:00, NaN  
14-Nov-2017 17:00:00, NaN  
14-Nov-2017 18:00:00, NaN  
14-Nov-2017 19:00:00, NaN  
14-Nov-2017 20:00:00, NaN  
14-Nov-2017 21:00:00, NaN  
14-Nov-2017 22:00:00, NaN  
14-Nov-2017 23:00:00, NaN  
15-Nov-2017, NaN  
15-Nov-2017 01:00:00, NaN  
15-Nov-2017 02:00:00, NaN  
15-Nov-2017 03:00:00, NaN  
15-Nov-2017 04:00:00, NaN  
15-Nov-2017 05:00:00, NaN  
15-Nov-2017 06:00:00, NaN  
15-Nov-2017 07:00:00, NaN  
15-Nov-2017 08:00:00, NaN  
15-Nov-2017 09:00:00, NaN  
15-Nov-2017 10:00:00, NaN  
15-Nov-2017 11:00:00, NaN  
15-Nov-2017 12:00:00, NaN  
15-Nov-2017 13:00:00, NaN  
15-Nov-2017 14:00:00, NaN

|              |           |     |
|--------------|-----------|-----|
| 15-Nov-2017  | 15:00:00, | NaN |
| 15-Nov-2017  | 16:00:00, | NaN |
| 15-Nov-2017  | 17:00:00, | NaN |
| 15-Nov-2017  | 18:00:00, | NaN |
| 15-Nov-2017  | 19:00:00, | NaN |
| 15-Nov-2017  | 20:00:00, | NaN |
| 15-Nov-2017  | 21:00:00, | NaN |
| 15-Nov-2017  | 22:00:00, | NaN |
| 15-Nov-2017  | 23:00:00, | NaN |
| 16-Nov-2017, | NaN       |     |
| 16-Nov-2017  | 01:00:00, | NaN |
| 16-Nov-2017  | 02:00:00, | NaN |
| 16-Nov-2017  | 03:00:00, | NaN |
| 16-Nov-2017  | 04:00:00, | NaN |
| 16-Nov-2017  | 05:00:00, | NaN |
| 16-Nov-2017  | 06:00:00, | NaN |
| 16-Nov-2017  | 07:00:00, | NaN |
| 16-Nov-2017  | 08:00:00, | NaN |
| 16-Nov-2017  | 09:00:00, | NaN |
| 16-Nov-2017  | 10:00:00, | NaN |
| 16-Nov-2017  | 11:00:00, | NaN |
| 16-Nov-2017  | 12:00:00, | NaN |
| 16-Nov-2017  | 13:00:00, | NaN |
| 16-Nov-2017  | 14:00:00, | NaN |
| 16-Nov-2017  | 15:00:00, | NaN |
| 16-Nov-2017  | 16:00:00, | NaN |
| 16-Nov-2017  | 17:00:00, | NaN |
| 16-Nov-2017  | 18:00:00, | NaN |
| 16-Nov-2017  | 19:00:00, | NaN |
| 16-Nov-2017  | 20:00:00, | NaN |
| 16-Nov-2017  | 21:00:00, | NaN |
| 16-Nov-2017  | 22:00:00, | NaN |
| 16-Nov-2017  | 23:00:00, | NaN |
| 17-Nov-2017, | NaN       |     |
| 17-Nov-2017  | 01:00:00, | NaN |
| 17-Nov-2017  | 02:00:00, | NaN |
| 17-Nov-2017  | 03:00:00, | NaN |
| 17-Nov-2017  | 04:00:00, | NaN |
| 17-Nov-2017  | 05:00:00, | NaN |
| 17-Nov-2017  | 06:00:00, | NaN |
| 17-Nov-2017  | 07:00:00, | NaN |
| 17-Nov-2017  | 08:00:00, | NaN |
| 17-Nov-2017  | 09:00:00, | NaN |
| 17-Nov-2017  | 10:00:00, | NaN |
| 17-Nov-2017  | 11:00:00, | NaN |
| 17-Nov-2017  | 12:00:00, | NaN |
| 17-Nov-2017  | 13:00:00, | NaN |
| 17-Nov-2017  | 14:00:00, | NaN |
| 17-Nov-2017  | 15:00:00, | NaN |
| 17-Nov-2017  | 16:00:00, | NaN |
| 17-Nov-2017  | 17:00:00, | NaN |
| 17-Nov-2017  | 18:00:00, | NaN |
| 17-Nov-2017  | 19:00:00, | NaN |
| 17-Nov-2017  | 20:00:00, | NaN |
| 17-Nov-2017  | 21:00:00, | NaN |
| 17-Nov-2017  | 22:00:00, | NaN |
| 17-Nov-2017  | 23:00:00, | NaN |
| 18-Nov-2017, | NaN       |     |
| 18-Nov-2017  | 01:00:00, | NaN |
| 18-Nov-2017  | 02:00:00, | NaN |
| 18-Nov-2017  | 03:00:00, | NaN |
| 18-Nov-2017  | 04:00:00, | NaN |
| 18-Nov-2017  | 05:00:00, | NaN |
| 18-Nov-2017  | 06:00:00, | NaN |

|              |           |     |
|--------------|-----------|-----|
| 18-Nov-2017  | 07:00:00, | NaN |
| 18-Nov-2017  | 08:00:00, | NaN |
| 18-Nov-2017  | 09:00:00, | NaN |
| 18-Nov-2017  | 10:00:00, | NaN |
| 18-Nov-2017  | 11:00:00, | NaN |
| 18-Nov-2017  | 12:00:00, | NaN |
| 18-Nov-2017  | 13:00:00, | NaN |
| 18-Nov-2017  | 14:00:00, | NaN |
| 18-Nov-2017  | 15:00:00, | NaN |
| 18-Nov-2017  | 16:00:00, | NaN |
| 18-Nov-2017  | 17:00:00, | NaN |
| 18-Nov-2017  | 18:00:00, | NaN |
| 18-Nov-2017  | 19:00:00, | NaN |
| 18-Nov-2017  | 20:00:00, | NaN |
| 18-Nov-2017  | 21:00:00, | NaN |
| 18-Nov-2017  | 22:00:00, | NaN |
| 18-Nov-2017  | 23:00:00, | NaN |
| 19-Nov-2017, |           | NaN |
| 19-Nov-2017  | 01:00:00, | NaN |
| 19-Nov-2017  | 02:00:00, | NaN |
| 19-Nov-2017  | 03:00:00, | NaN |
| 19-Nov-2017  | 04:00:00, | NaN |
| 19-Nov-2017  | 05:00:00, | NaN |
| 19-Nov-2017  | 06:00:00, | NaN |
| 19-Nov-2017  | 07:00:00, | NaN |
| 19-Nov-2017  | 08:00:00, | NaN |
| 19-Nov-2017  | 09:00:00, | NaN |
| 19-Nov-2017  | 10:00:00, | NaN |
| 19-Nov-2017  | 11:00:00, | NaN |
| 19-Nov-2017  | 12:00:00, | NaN |
| 19-Nov-2017  | 13:00:00, | NaN |
| 19-Nov-2017  | 14:00:00, | NaN |
| 19-Nov-2017  | 15:00:00, | NaN |
| 19-Nov-2017  | 16:00:00, | NaN |
| 19-Nov-2017  | 17:00:00, | NaN |
| 19-Nov-2017  | 18:00:00, | NaN |
| 19-Nov-2017  | 19:00:00, | NaN |
| 19-Nov-2017  | 20:00:00, | NaN |
| 19-Nov-2017  | 21:00:00, | NaN |
| 19-Nov-2017  | 22:00:00, | NaN |
| 19-Nov-2017  | 23:00:00, | NaN |
| 20-Nov-2017, |           | NaN |
| 20-Nov-2017  | 01:00:00, | NaN |
| 20-Nov-2017  | 02:00:00, | NaN |
| 20-Nov-2017  | 03:00:00, | NaN |
| 20-Nov-2017  | 04:00:00, | NaN |
| 20-Nov-2017  | 05:00:00, | NaN |
| 20-Nov-2017  | 06:00:00, | NaN |
| 20-Nov-2017  | 07:00:00, | NaN |
| 20-Nov-2017  | 08:00:00, | NaN |
| 20-Nov-2017  | 09:00:00, | NaN |
| 20-Nov-2017  | 10:00:00, | NaN |
| 20-Nov-2017  | 11:00:00, | NaN |
| 20-Nov-2017  | 12:00:00, | NaN |
| 20-Nov-2017  | 13:00:00, | NaN |
| 20-Nov-2017  | 14:00:00, | NaN |
| 20-Nov-2017  | 15:00:00, | NaN |
| 20-Nov-2017  | 16:00:00, | NaN |
| 20-Nov-2017  | 17:00:00, | NaN |
| 20-Nov-2017  | 18:00:00, | NaN |
| 20-Nov-2017  | 19:00:00, | NaN |
| 20-Nov-2017  | 20:00:00, | NaN |
| 20-Nov-2017  | 21:00:00, | NaN |
| 20-Nov-2017  | 22:00:00, | NaN |

20-Nov-2017 23:00:00, NaN  
21-Nov-2017, NaN  
21-Nov-2017 01:00:00, NaN  
21-Nov-2017 02:00:00, NaN  
21-Nov-2017 03:00:00, NaN  
21-Nov-2017 04:00:00, NaN  
21-Nov-2017 05:00:00, NaN  
21-Nov-2017 06:00:00, NaN  
21-Nov-2017 07:00:00, NaN  
21-Nov-2017 08:00:00, NaN  
21-Nov-2017 09:00:00, NaN  
21-Nov-2017 10:00:00, NaN  
21-Nov-2017 11:00:00, NaN  
21-Nov-2017 12:00:00, NaN  
21-Nov-2017 13:00:00, NaN  
21-Nov-2017 14:00:00, NaN  
21-Nov-2017 15:00:00, NaN  
21-Nov-2017 16:00:00, NaN  
21-Nov-2017 17:00:00, NaN  
21-Nov-2017 18:00:00, NaN  
21-Nov-2017 19:00:00, NaN  
21-Nov-2017 20:00:00, NaN  
21-Nov-2017 21:00:00, NaN  
21-Nov-2017 22:00:00, NaN  
21-Nov-2017 23:00:00, NaN  
22-Nov-2017, NaN  
22-Nov-2017 01:00:00, NaN  
22-Nov-2017 02:00:00, NaN  
22-Nov-2017 03:00:00, NaN  
22-Nov-2017 04:00:00, NaN  
22-Nov-2017 05:00:00, NaN  
22-Nov-2017 06:00:00, NaN  
22-Nov-2017 07:00:00, NaN  
22-Nov-2017 08:00:00, NaN  
22-Nov-2017 09:00:00, NaN  
22-Nov-2017 10:00:00, NaN  
22-Nov-2017 11:00:00, NaN  
22-Nov-2017 12:00:00, NaN  
22-Nov-2017 13:00:00, NaN  
22-Nov-2017 14:00:00, NaN  
22-Nov-2017 15:00:00, NaN  
22-Nov-2017 16:00:00, NaN  
22-Nov-2017 17:00:00, NaN  
22-Nov-2017 18:00:00, NaN  
22-Nov-2017 19:00:00, NaN  
22-Nov-2017 20:00:00, NaN  
22-Nov-2017 21:00:00, NaN  
22-Nov-2017 22:00:00, NaN  
22-Nov-2017 23:00:00, NaN  
23-Nov-2017, NaN  
23-Nov-2017 01:00:00, NaN  
23-Nov-2017 02:00:00, NaN  
23-Nov-2017 03:00:00, NaN  
23-Nov-2017 04:00:00, NaN  
23-Nov-2017 05:00:00, NaN  
23-Nov-2017 06:00:00, NaN  
23-Nov-2017 07:00:00, NaN  
23-Nov-2017 08:00:00, NaN  
23-Nov-2017 09:00:00, NaN  
23-Nov-2017 10:00:00, NaN  
23-Nov-2017 11:00:00, NaN  
23-Nov-2017 12:00:00, NaN  
23-Nov-2017 13:00:00, NaN  
23-Nov-2017 14:00:00, NaN

23-Nov-2017 15:00:00, NaN  
23-Nov-2017 16:00:00, NaN  
23-Nov-2017 17:00:00, NaN  
23-Nov-2017 18:00:00, NaN  
23-Nov-2017 19:00:00, NaN  
23-Nov-2017 20:00:00, NaN  
23-Nov-2017 21:00:00, NaN  
23-Nov-2017 22:00:00, NaN  
23-Nov-2017 23:00:00, NaN  
24-Nov-2017, NaN  
24-Nov-2017 01:00:00, NaN  
24-Nov-2017 02:00:00, NaN  
24-Nov-2017 03:00:00, NaN  
24-Nov-2017 04:00:00, NaN  
24-Nov-2017 05:00:00, NaN  
24-Nov-2017 06:00:00, NaN  
24-Nov-2017 07:00:00, NaN  
24-Nov-2017 08:00:00, NaN  
24-Nov-2017 09:00:00, NaN  
24-Nov-2017 10:00:00, NaN  
24-Nov-2017 11:00:00, NaN  
24-Nov-2017 12:00:00, NaN  
24-Nov-2017 13:00:00, NaN  
24-Nov-2017 14:00:00, NaN  
24-Nov-2017 15:00:00, NaN  
24-Nov-2017 16:00:00, NaN  
24-Nov-2017 17:00:00, NaN  
24-Nov-2017 18:00:00, NaN  
24-Nov-2017 19:00:00, NaN  
24-Nov-2017 20:00:00, NaN  
24-Nov-2017 21:00:00, NaN  
24-Nov-2017 22:00:00, NaN  
24-Nov-2017 23:00:00, NaN  
25-Nov-2017, NaN  
25-Nov-2017 01:00:00, NaN  
25-Nov-2017 02:00:00, NaN  
25-Nov-2017 03:00:00, NaN  
25-Nov-2017 04:00:00, NaN  
25-Nov-2017 05:00:00, NaN  
25-Nov-2017 06:00:00, NaN  
25-Nov-2017 07:00:00, NaN  
25-Nov-2017 08:00:00, NaN  
25-Nov-2017 09:00:00, NaN  
25-Nov-2017 10:00:00, NaN  
25-Nov-2017 11:00:00, NaN  
25-Nov-2017 12:00:00, NaN  
25-Nov-2017 13:00:00, NaN  
25-Nov-2017 14:00:00, NaN  
25-Nov-2017 15:00:00, NaN  
25-Nov-2017 16:00:00, NaN  
25-Nov-2017 17:00:00, NaN  
25-Nov-2017 18:00:00, NaN  
25-Nov-2017 19:00:00, NaN  
25-Nov-2017 20:00:00, NaN  
25-Nov-2017 21:00:00, NaN  
25-Nov-2017 22:00:00, NaN  
25-Nov-2017 23:00:00, NaN  
26-Nov-2017, NaN  
26-Nov-2017 01:00:00, NaN  
26-Nov-2017 02:00:00, NaN  
26-Nov-2017 03:00:00, NaN  
26-Nov-2017 04:00:00, NaN  
26-Nov-2017 05:00:00, NaN  
26-Nov-2017 06:00:00, NaN

|              |           |     |
|--------------|-----------|-----|
| 26-Nov-2017  | 07:00:00, | NaN |
| 26-Nov-2017  | 08:00:00, | NaN |
| 26-Nov-2017  | 09:00:00, | NaN |
| 26-Nov-2017  | 10:00:00, | NaN |
| 26-Nov-2017  | 11:00:00, | NaN |
| 26-Nov-2017  | 12:00:00, | NaN |
| 26-Nov-2017  | 13:00:00, | NaN |
| 26-Nov-2017  | 14:00:00, | NaN |
| 26-Nov-2017  | 15:00:00, | NaN |
| 26-Nov-2017  | 16:00:00, | NaN |
| 26-Nov-2017  | 17:00:00, | NaN |
| 26-Nov-2017  | 18:00:00, | NaN |
| 26-Nov-2017  | 19:00:00, | NaN |
| 26-Nov-2017  | 20:00:00, | NaN |
| 26-Nov-2017  | 21:00:00, | NaN |
| 26-Nov-2017  | 22:00:00, | NaN |
| 26-Nov-2017  | 23:00:00, | NaN |
| 27-Nov-2017, | NaN       |     |
| 27-Nov-2017  | 01:00:00, | NaN |
| 27-Nov-2017  | 02:00:00, | NaN |
| 27-Nov-2017  | 03:00:00, | NaN |
| 27-Nov-2017  | 04:00:00, | NaN |
| 27-Nov-2017  | 05:00:00, | NaN |
| 27-Nov-2017  | 06:00:00, | NaN |
| 27-Nov-2017  | 07:00:00, | NaN |
| 27-Nov-2017  | 08:00:00, | NaN |
| 27-Nov-2017  | 09:00:00, | NaN |
| 27-Nov-2017  | 10:00:00, | NaN |
| 27-Nov-2017  | 11:00:00, | NaN |
| 27-Nov-2017  | 12:00:00, | NaN |
| 27-Nov-2017  | 13:00:00, | NaN |
| 27-Nov-2017  | 14:00:00, | NaN |
| 27-Nov-2017  | 15:00:00, | NaN |
| 27-Nov-2017  | 16:00:00, | NaN |
| 27-Nov-2017  | 17:00:00, | NaN |
| 27-Nov-2017  | 18:00:00, | NaN |
| 27-Nov-2017  | 19:00:00, | NaN |
| 27-Nov-2017  | 20:00:00, | NaN |
| 27-Nov-2017  | 21:00:00, | NaN |
| 27-Nov-2017  | 22:00:00, | NaN |
| 27-Nov-2017  | 23:00:00, | NaN |
| 28-Nov-2017, | NaN       |     |
| 28-Nov-2017  | 01:00:00, | NaN |
| 28-Nov-2017  | 02:00:00, | NaN |
| 28-Nov-2017  | 03:00:00, | NaN |
| 28-Nov-2017  | 04:00:00, | NaN |
| 28-Nov-2017  | 05:00:00, | NaN |
| 28-Nov-2017  | 06:00:00, | NaN |
| 28-Nov-2017  | 07:00:00, | NaN |
| 28-Nov-2017  | 08:00:00, | NaN |
| 28-Nov-2017  | 09:00:00, | NaN |
| 28-Nov-2017  | 10:00:00, | NaN |
| 28-Nov-2017  | 11:00:00, | NaN |
| 28-Nov-2017  | 12:00:00, | NaN |
| 28-Nov-2017  | 13:00:00, | NaN |
| 28-Nov-2017  | 14:00:00, | NaN |
| 28-Nov-2017  | 15:00:00, | NaN |
| 28-Nov-2017  | 16:00:00, | NaN |
| 28-Nov-2017  | 17:00:00, | NaN |
| 28-Nov-2017  | 18:00:00, | NaN |
| 28-Nov-2017  | 19:00:00, | NaN |
| 28-Nov-2017  | 20:00:00, | NaN |
| 28-Nov-2017  | 21:00:00, | NaN |
| 28-Nov-2017  | 22:00:00, | NaN |

28-Nov-2017 23:00:00, NaN  
29-Nov-2017, NaN  
29-Nov-2017 01:00:00, NaN  
29-Nov-2017 02:00:00, NaN  
29-Nov-2017 03:00:00, NaN  
29-Nov-2017 04:00:00, NaN  
29-Nov-2017 05:00:00, NaN  
29-Nov-2017 06:00:00, NaN  
29-Nov-2017 07:00:00, NaN  
29-Nov-2017 08:00:00, NaN  
29-Nov-2017 09:00:00, NaN  
29-Nov-2017 10:00:00, NaN  
29-Nov-2017 11:00:00, NaN  
29-Nov-2017 12:00:00, NaN  
29-Nov-2017 13:00:00, NaN  
29-Nov-2017 14:00:00, NaN  
29-Nov-2017 15:00:00, NaN  
29-Nov-2017 16:00:00, NaN  
29-Nov-2017 17:00:00, NaN  
29-Nov-2017 18:00:00, NaN  
29-Nov-2017 19:00:00, NaN  
29-Nov-2017 20:00:00, NaN  
29-Nov-2017 21:00:00, NaN  
29-Nov-2017 22:00:00, NaN  
29-Nov-2017 23:00:00, NaN  
30-Nov-2017, NaN  
30-Nov-2017 01:00:00, NaN  
30-Nov-2017 02:00:00, NaN  
30-Nov-2017 03:00:00, NaN  
30-Nov-2017 04:00:00, NaN  
30-Nov-2017 05:00:00, NaN  
30-Nov-2017 06:00:00, NaN  
30-Nov-2017 07:00:00, NaN  
30-Nov-2017 08:00:00, NaN  
30-Nov-2017 09:00:00, NaN  
30-Nov-2017 10:00:00, NaN  
30-Nov-2017 11:00:00, NaN  
30-Nov-2017 12:00:00, NaN  
30-Nov-2017 13:00:00, NaN  
30-Nov-2017 14:00:00, NaN  
30-Nov-2017 15:00:00, NaN  
30-Nov-2017 16:00:00, NaN  
30-Nov-2017 17:00:00, NaN  
30-Nov-2017 18:00:00, NaN  
30-Nov-2017 19:00:00, NaN  
30-Nov-2017 20:00:00, NaN  
30-Nov-2017 21:00:00, NaN  
30-Nov-2017 22:00:00, NaN  
30-Nov-2017 23:00:00, NaN  
01-Dec-2017, NaN  
01-Dec-2017 01:00:00, NaN  
01-Dec-2017 02:00:00, NaN  
01-Dec-2017 03:00:00, NaN  
01-Dec-2017 04:00:00, NaN  
01-Dec-2017 05:00:00, NaN  
01-Dec-2017 06:00:00, NaN  
01-Dec-2017 07:00:00, NaN  
01-Dec-2017 08:00:00, NaN  
01-Dec-2017 09:00:00, NaN  
01-Dec-2017 10:00:00, NaN  
01-Dec-2017 11:00:00, NaN  
01-Dec-2017 12:00:00, NaN  
01-Dec-2017 13:00:00, NaN  
01-Dec-2017 14:00:00, NaN

01-Dec-2017 15:00:00, NaN  
01-Dec-2017 16:00:00, NaN  
01-Dec-2017 17:00:00, NaN  
01-Dec-2017 18:00:00, NaN  
01-Dec-2017 19:00:00, NaN  
01-Dec-2017 20:00:00, NaN  
01-Dec-2017 21:00:00, NaN  
01-Dec-2017 22:00:00, NaN  
01-Dec-2017 23:00:00, NaN  
02-Dec-2017, NaN  
02-Dec-2017 01:00:00, NaN  
02-Dec-2017 02:00:00, NaN  
02-Dec-2017 03:00:00, NaN  
02-Dec-2017 04:00:00, NaN  
02-Dec-2017 05:00:00, NaN  
02-Dec-2017 06:00:00, NaN  
02-Dec-2017 07:00:00, NaN  
02-Dec-2017 08:00:00, NaN  
02-Dec-2017 09:00:00, NaN  
02-Dec-2017 10:00:00, NaN  
02-Dec-2017 11:00:00, NaN  
02-Dec-2017 12:00:00, NaN  
02-Dec-2017 13:00:00, NaN  
02-Dec-2017 14:00:00, NaN  
02-Dec-2017 15:00:00, NaN  
02-Dec-2017 16:00:00, NaN  
02-Dec-2017 17:00:00, NaN  
02-Dec-2017 18:00:00, NaN  
02-Dec-2017 19:00:00, NaN  
02-Dec-2017 20:00:00, NaN  
02-Dec-2017 21:00:00, NaN  
02-Dec-2017 22:00:00, NaN  
02-Dec-2017 23:00:00, NaN  
03-Dec-2017, NaN  
03-Dec-2017 01:00:00, NaN  
03-Dec-2017 02:00:00, NaN  
03-Dec-2017 03:00:00, NaN  
03-Dec-2017 04:00:00, NaN  
03-Dec-2017 05:00:00, NaN  
03-Dec-2017 06:00:00, NaN  
03-Dec-2017 07:00:00, NaN  
03-Dec-2017 08:00:00, NaN  
03-Dec-2017 09:00:00, NaN  
03-Dec-2017 10:00:00, NaN  
03-Dec-2017 11:00:00, NaN  
03-Dec-2017 12:00:00, NaN  
03-Dec-2017 13:00:00, NaN  
03-Dec-2017 14:00:00, NaN  
03-Dec-2017 15:00:00, NaN  
03-Dec-2017 16:00:00, NaN  
03-Dec-2017 17:00:00, NaN  
03-Dec-2017 18:00:00, NaN  
03-Dec-2017 19:00:00, NaN  
03-Dec-2017 20:00:00, NaN  
03-Dec-2017 21:00:00, NaN  
03-Dec-2017 22:00:00, NaN  
03-Dec-2017 23:00:00, NaN  
04-Dec-2017, NaN  
04-Dec-2017 01:00:00, NaN  
04-Dec-2017 02:00:00, NaN  
04-Dec-2017 03:00:00, NaN  
04-Dec-2017 04:00:00, NaN  
04-Dec-2017 05:00:00, NaN  
04-Dec-2017 06:00:00, NaN



04-Dec-2017 07:00:00, NaN  
04-Dec-2017 08:00:00, NaN  
04-Dec-2017 09:00:00, NaN  
04-Dec-2017 10:00:00, NaN  
04-Dec-2017 11:00:00, NaN  
04-Dec-2017 12:00:00, NaN  
04-Dec-2017 13:00:00, NaN  
04-Dec-2017 14:00:00, NaN  
04-Dec-2017 15:00:00, NaN  
04-Dec-2017 16:00:00, NaN  
04-Dec-2017 17:00:00, NaN  
04-Dec-2017 18:00:00, NaN  
04-Dec-2017 19:00:00, NaN  
04-Dec-2017 20:00:00, NaN  
04-Dec-2017 21:00:00, NaN  
04-Dec-2017 22:00:00, NaN  
04-Dec-2017 23:00:00, NaN  
05-Dec-2017, NaN  
05-Dec-2017 01:00:00, NaN  
05-Dec-2017 02:00:00, NaN  
05-Dec-2017 03:00:00, NaN  
05-Dec-2017 04:00:00, NaN  
05-Dec-2017 05:00:00, NaN  
05-Dec-2017 06:00:00, NaN  
05-Dec-2017 07:00:00, NaN  
05-Dec-2017 08:00:00, NaN  
05-Dec-2017 09:00:00, NaN  
05-Dec-2017 10:00:00, NaN  
05-Dec-2017 11:00:00, NaN  
05-Dec-2017 12:00:00, NaN  
05-Dec-2017 13:00:00, NaN  
05-Dec-2017 14:00:00, NaN  
05-Dec-2017 15:00:00, NaN  
05-Dec-2017 16:00:00, NaN  
05-Dec-2017 17:00:00, NaN  
05-Dec-2017 18:00:00, NaN  
05-Dec-2017 19:00:00, NaN  
05-Dec-2017 20:00:00, NaN  
05-Dec-2017 21:00:00, NaN  
05-Dec-2017 22:00:00, NaN  
05-Dec-2017 23:00:00, NaN  
06-Dec-2017, NaN  
06-Dec-2017 01:00:00, NaN  
06-Dec-2017 02:00:00, NaN  
06-Dec-2017 03:00:00, NaN  
06-Dec-2017 04:00:00, NaN  
06-Dec-2017 05:00:00, NaN  
06-Dec-2017 06:00:00, NaN  
06-Dec-2017 07:00:00, NaN  
06-Dec-2017 08:00:00, NaN  
06-Dec-2017 09:00:00, NaN  
06-Dec-2017 10:00:00, NaN  
06-Dec-2017 11:00:00, NaN  
06-Dec-2017 12:00:00, NaN  
06-Dec-2017 13:00:00, NaN  
06-Dec-2017 14:00:00, NaN  
06-Dec-2017 15:00:00, NaN  
06-Dec-2017 16:00:00, NaN  
06-Dec-2017 17:00:00, NaN  
06-Dec-2017 18:00:00, NaN  
06-Dec-2017 19:00:00, NaN  
06-Dec-2017 20:00:00, NaN  
06-Dec-2017 21:00:00, NaN  
06-Dec-2017 22:00:00, NaN

06-Dec-2017 23:00:00, NaN  
07-Dec-2017, NaN  
07-Dec-2017 01:00:00, NaN  
07-Dec-2017 02:00:00, NaN  
07-Dec-2017 03:00:00, NaN  
07-Dec-2017 04:00:00, NaN  
07-Dec-2017 05:00:00, NaN  
07-Dec-2017 06:00:00, NaN  
07-Dec-2017 07:00:00, NaN  
07-Dec-2017 08:00:00, NaN  
07-Dec-2017 09:00:00, NaN  
07-Dec-2017 10:00:00, NaN  
07-Dec-2017 11:00:00, NaN  
07-Dec-2017 12:00:00, NaN  
07-Dec-2017 13:00:00, NaN  
07-Dec-2017 14:00:00, NaN  
07-Dec-2017 15:00:00, NaN  
07-Dec-2017 16:00:00, NaN  
07-Dec-2017 17:00:00, NaN  
07-Dec-2017 18:00:00, NaN  
07-Dec-2017 19:00:00, NaN  
07-Dec-2017 20:00:00, NaN  
07-Dec-2017 21:00:00, NaN  
07-Dec-2017 22:00:00, NaN  
07-Dec-2017 23:00:00, NaN  
08-Dec-2017, NaN  
08-Dec-2017 01:00:00, NaN  
08-Dec-2017 02:00:00, NaN  
08-Dec-2017 03:00:00, NaN  
08-Dec-2017 04:00:00, NaN  
08-Dec-2017 05:00:00, NaN  
08-Dec-2017 06:00:00, NaN  
08-Dec-2017 07:00:00, NaN  
08-Dec-2017 08:00:00, NaN  
08-Dec-2017 09:00:00, NaN  
08-Dec-2017 10:00:00, NaN  
08-Dec-2017 11:00:00, NaN  
08-Dec-2017 12:00:00, NaN  
08-Dec-2017 13:00:00, NaN  
08-Dec-2017 14:00:00, NaN  
08-Dec-2017 15:00:00, NaN  
08-Dec-2017 16:00:00, NaN  
08-Dec-2017 17:00:00, NaN  
08-Dec-2017 18:00:00, NaN  
08-Dec-2017 19:00:00, NaN  
08-Dec-2017 20:00:00, NaN  
08-Dec-2017 21:00:00, NaN  
08-Dec-2017 22:00:00, NaN  
08-Dec-2017 23:00:00, NaN  
09-Dec-2017, NaN  
09-Dec-2017 01:00:00, NaN  
09-Dec-2017 02:00:00, NaN  
09-Dec-2017 03:00:00, NaN  
09-Dec-2017 04:00:00, NaN  
09-Dec-2017 05:00:00, NaN  
09-Dec-2017 06:00:00, NaN  
09-Dec-2017 07:00:00, NaN  
09-Dec-2017 08:00:00, NaN  
09-Dec-2017 09:00:00, NaN  
09-Dec-2017 10:00:00, NaN  
09-Dec-2017 11:00:00, NaN  
09-Dec-2017 12:00:00, NaN  
09-Dec-2017 13:00:00, NaN  
09-Dec-2017 14:00:00, NaN

09-Dec-2017 15:00:00, NaN  
09-Dec-2017 16:00:00, NaN  
09-Dec-2017 17:00:00, NaN  
09-Dec-2017 18:00:00, NaN  
09-Dec-2017 19:00:00, NaN  
09-Dec-2017 20:00:00, NaN  
09-Dec-2017 21:00:00, NaN  
09-Dec-2017 22:00:00, NaN  
09-Dec-2017 23:00:00, NaN  
10-Dec-2017, NaN  
10-Dec-2017 01:00:00, NaN  
10-Dec-2017 02:00:00, NaN  
10-Dec-2017 03:00:00, NaN  
10-Dec-2017 04:00:00, NaN  
10-Dec-2017 05:00:00, NaN  
10-Dec-2017 06:00:00, NaN  
10-Dec-2017 07:00:00, NaN  
10-Dec-2017 08:00:00, NaN  
10-Dec-2017 09:00:00, NaN  
10-Dec-2017 10:00:00, NaN  
10-Dec-2017 11:00:00, NaN  
10-Dec-2017 12:00:00, NaN  
10-Dec-2017 13:00:00, NaN  
10-Dec-2017 14:00:00, NaN  
10-Dec-2017 15:00:00, NaN  
10-Dec-2017 16:00:00, NaN  
10-Dec-2017 17:00:00, NaN  
10-Dec-2017 18:00:00, NaN  
10-Dec-2017 19:00:00, NaN  
10-Dec-2017 20:00:00, NaN  
10-Dec-2017 21:00:00, NaN  
10-Dec-2017 22:00:00, NaN  
10-Dec-2017 23:00:00, NaN  
11-Dec-2017, NaN  
11-Dec-2017 01:00:00, NaN  
11-Dec-2017 02:00:00, NaN  
11-Dec-2017 03:00:00, NaN  
11-Dec-2017 04:00:00, NaN  
11-Dec-2017 05:00:00, NaN  
11-Dec-2017 06:00:00, NaN  
11-Dec-2017 07:00:00, NaN  
11-Dec-2017 08:00:00, NaN  
11-Dec-2017 09:00:00, NaN  
11-Dec-2017 10:00:00, NaN  
11-Dec-2017 11:00:00, NaN  
11-Dec-2017 12:00:00, NaN  
11-Dec-2017 13:00:00, NaN  
11-Dec-2017 14:00:00, NaN  
11-Dec-2017 15:00:00, NaN  
11-Dec-2017 16:00:00, NaN  
11-Dec-2017 17:00:00, NaN  
11-Dec-2017 18:00:00, NaN  
11-Dec-2017 19:00:00, NaN  
11-Dec-2017 20:00:00, NaN  
11-Dec-2017 21:00:00, NaN  
11-Dec-2017 22:00:00, NaN  
11-Dec-2017 23:00:00, NaN  
12-Dec-2017, NaN  
12-Dec-2017 01:00:00, NaN  
12-Dec-2017 02:00:00, NaN  
12-Dec-2017 03:00:00, NaN  
12-Dec-2017 04:00:00, NaN  
12-Dec-2017 05:00:00, NaN  
12-Dec-2017 06:00:00, NaN

12-Dec-2017 07:00:00, NaN  
12-Dec-2017 08:00:00, NaN  
12-Dec-2017 09:00:00, NaN  
12-Dec-2017 10:00:00, NaN  
12-Dec-2017 11:00:00, NaN  
12-Dec-2017 12:00:00, NaN  
12-Dec-2017 13:00:00, NaN  
12-Dec-2017 14:00:00, NaN  
12-Dec-2017 15:00:00, NaN  
12-Dec-2017 16:00:00, NaN  
12-Dec-2017 17:00:00, NaN  
12-Dec-2017 18:00:00, NaN  
12-Dec-2017 19:00:00, NaN  
12-Dec-2017 20:00:00, NaN  
12-Dec-2017 21:00:00, NaN  
12-Dec-2017 22:00:00, NaN  
12-Dec-2017 23:00:00, NaN  
13-Dec-2017, NaN  
13-Dec-2017 01:00:00, NaN  
13-Dec-2017 02:00:00, NaN  
13-Dec-2017 03:00:00, NaN  
13-Dec-2017 04:00:00, NaN  
13-Dec-2017 05:00:00, NaN  
13-Dec-2017 06:00:00, NaN  
13-Dec-2017 07:00:00, NaN  
13-Dec-2017 08:00:00, NaN  
13-Dec-2017 09:00:00, NaN  
13-Dec-2017 10:00:00, NaN  
13-Dec-2017 11:00:00, NaN  
13-Dec-2017 12:00:00, NaN  
13-Dec-2017 13:00:00, NaN  
13-Dec-2017 14:00:00, NaN  
13-Dec-2017 15:00:00, NaN  
13-Dec-2017 16:00:00, NaN  
13-Dec-2017 17:00:00, NaN  
13-Dec-2017 18:00:00, NaN  
13-Dec-2017 19:00:00, NaN  
13-Dec-2017 20:00:00, NaN  
13-Dec-2017 21:00:00, NaN  
13-Dec-2017 22:00:00, NaN  
13-Dec-2017 23:00:00, NaN  
14-Dec-2017, NaN  
14-Dec-2017 01:00:00, NaN  
14-Dec-2017 02:00:00, NaN  
14-Dec-2017 03:00:00, NaN  
14-Dec-2017 04:00:00, NaN  
14-Dec-2017 05:00:00, NaN  
14-Dec-2017 06:00:00, NaN  
14-Dec-2017 07:00:00, NaN  
14-Dec-2017 08:00:00, NaN  
14-Dec-2017 09:00:00, NaN  
14-Dec-2017 10:00:00, NaN  
14-Dec-2017 11:00:00, NaN  
14-Dec-2017 12:00:00, NaN  
14-Dec-2017 13:00:00, NaN  
14-Dec-2017 14:00:00, NaN  
14-Dec-2017 15:00:00, NaN  
14-Dec-2017 16:00:00, NaN  
14-Dec-2017 17:00:00, NaN  
14-Dec-2017 18:00:00, NaN  
14-Dec-2017 19:00:00, NaN  
14-Dec-2017 20:00:00, NaN  
14-Dec-2017 21:00:00, NaN  
14-Dec-2017 22:00:00, NaN

14-Dec-2017 23:00:00, NaN  
15-Dec-2017, NaN  
15-Dec-2017 01:00:00, NaN  
15-Dec-2017 02:00:00, NaN  
15-Dec-2017 03:00:00, NaN  
15-Dec-2017 04:00:00, NaN  
15-Dec-2017 05:00:00, NaN  
15-Dec-2017 06:00:00, NaN  
15-Dec-2017 07:00:00, NaN  
15-Dec-2017 08:00:00, NaN  
15-Dec-2017 09:00:00, NaN  
15-Dec-2017 10:00:00, NaN  
15-Dec-2017 11:00:00, NaN  
15-Dec-2017 12:00:00, NaN  
15-Dec-2017 13:00:00, NaN  
15-Dec-2017 14:00:00, NaN  
15-Dec-2017 15:00:00, NaN  
15-Dec-2017 16:00:00, NaN  
15-Dec-2017 17:00:00, NaN  
15-Dec-2017 18:00:00, NaN  
15-Dec-2017 19:00:00, NaN  
15-Dec-2017 20:00:00, NaN  
15-Dec-2017 21:00:00, NaN  
15-Dec-2017 22:00:00, NaN  
15-Dec-2017 23:00:00, NaN  
16-Dec-2017, NaN  
16-Dec-2017 01:00:00, NaN  
16-Dec-2017 02:00:00, NaN  
16-Dec-2017 03:00:00, NaN  
16-Dec-2017 04:00:00, NaN  
16-Dec-2017 05:00:00, NaN  
16-Dec-2017 06:00:00, NaN  
16-Dec-2017 07:00:00, NaN  
16-Dec-2017 08:00:00, NaN  
16-Dec-2017 09:00:00, NaN  
16-Dec-2017 10:00:00, NaN  
16-Dec-2017 11:00:00, NaN  
16-Dec-2017 12:00:00, NaN  
16-Dec-2017 13:00:00, NaN  
16-Dec-2017 14:00:00, NaN  
16-Dec-2017 15:00:00, NaN  
16-Dec-2017 16:00:00, NaN  
16-Dec-2017 17:00:00, NaN  
16-Dec-2017 18:00:00, NaN  
16-Dec-2017 19:00:00, NaN  
16-Dec-2017 20:00:00, NaN  
16-Dec-2017 21:00:00, NaN  
16-Dec-2017 22:00:00, NaN  
16-Dec-2017 23:00:00, NaN  
17-Dec-2017, NaN  
17-Dec-2017 01:00:00, NaN  
17-Dec-2017 02:00:00, NaN  
17-Dec-2017 03:00:00, NaN  
17-Dec-2017 04:00:00, NaN  
17-Dec-2017 05:00:00, NaN  
17-Dec-2017 06:00:00, NaN  
17-Dec-2017 07:00:00, NaN  
17-Dec-2017 08:00:00, NaN  
17-Dec-2017 09:00:00, NaN  
17-Dec-2017 10:00:00, NaN  
17-Dec-2017 11:00:00, NaN  
17-Dec-2017 12:00:00, NaN  
17-Dec-2017 13:00:00, NaN  
17-Dec-2017 14:00:00, NaN

17-Dec-2017 15:00:00, NaN  
17-Dec-2017 16:00:00, NaN  
17-Dec-2017 17:00:00, NaN  
17-Dec-2017 18:00:00, NaN  
17-Dec-2017 19:00:00, NaN  
17-Dec-2017 20:00:00, NaN  
17-Dec-2017 21:00:00, NaN  
17-Dec-2017 22:00:00, NaN  
17-Dec-2017 23:00:00, NaN  
18-Dec-2017, NaN  
18-Dec-2017 01:00:00, NaN  
18-Dec-2017 02:00:00, NaN  
18-Dec-2017 03:00:00, NaN  
18-Dec-2017 04:00:00, NaN  
18-Dec-2017 05:00:00, NaN  
18-Dec-2017 06:00:00, NaN  
18-Dec-2017 07:00:00, NaN  
18-Dec-2017 08:00:00, NaN  
18-Dec-2017 09:00:00, NaN  
18-Dec-2017 10:00:00, NaN  
18-Dec-2017 11:00:00, NaN  
18-Dec-2017 12:00:00, NaN  
18-Dec-2017 13:00:00, NaN  
18-Dec-2017 14:00:00, NaN  
18-Dec-2017 15:00:00, NaN  
18-Dec-2017 16:00:00, NaN  
18-Dec-2017 17:00:00, NaN  
18-Dec-2017 18:00:00, NaN  
18-Dec-2017 19:00:00, NaN  
18-Dec-2017 20:00:00, NaN  
18-Dec-2017 21:00:00, NaN  
18-Dec-2017 22:00:00, NaN  
18-Dec-2017 23:00:00, NaN  
19-Dec-2017, NaN  
19-Dec-2017 01:00:00, NaN  
19-Dec-2017 02:00:00, NaN  
19-Dec-2017 03:00:00, NaN  
19-Dec-2017 04:00:00, NaN  
19-Dec-2017 05:00:00, NaN  
19-Dec-2017 06:00:00, NaN  
19-Dec-2017 07:00:00, NaN  
19-Dec-2017 08:00:00, NaN  
19-Dec-2017 09:00:00, NaN  
19-Dec-2017 10:00:00, NaN  
19-Dec-2017 11:00:00, NaN  
19-Dec-2017 12:00:00, NaN  
19-Dec-2017 13:00:00, NaN  
19-Dec-2017 14:00:00, NaN  
19-Dec-2017 15:00:00, NaN  
19-Dec-2017 16:00:00, NaN  
19-Dec-2017 17:00:00, NaN  
19-Dec-2017 18:00:00, NaN  
19-Dec-2017 19:00:00, NaN  
19-Dec-2017 20:00:00, NaN  
19-Dec-2017 21:00:00, NaN  
19-Dec-2017 22:00:00, NaN  
19-Dec-2017 23:00:00, NaN  
20-Dec-2017, NaN  
20-Dec-2017 01:00:00, NaN  
20-Dec-2017 02:00:00, NaN  
20-Dec-2017 03:00:00, NaN  
20-Dec-2017 04:00:00, NaN  
20-Dec-2017 05:00:00, NaN  
20-Dec-2017 06:00:00, NaN

20-Dec-2017 07:00:00, NaN  
20-Dec-2017 08:00:00, NaN  
20-Dec-2017 09:00:00, NaN  
20-Dec-2017 10:00:00, NaN  
20-Dec-2017 11:00:00, NaN  
20-Dec-2017 12:00:00, NaN  
20-Dec-2017 13:00:00, NaN  
20-Dec-2017 14:00:00, NaN  
20-Dec-2017 15:00:00, NaN  
20-Dec-2017 16:00:00, NaN  
20-Dec-2017 17:00:00, NaN  
20-Dec-2017 18:00:00, NaN  
20-Dec-2017 19:00:00, NaN  
20-Dec-2017 20:00:00, NaN  
20-Dec-2017 21:00:00, NaN  
20-Dec-2017 22:00:00, NaN  
20-Dec-2017 23:00:00, NaN  
21-Dec-2017, NaN  
21-Dec-2017 01:00:00, NaN  
21-Dec-2017 02:00:00, NaN  
21-Dec-2017 03:00:00, NaN  
21-Dec-2017 04:00:00, NaN  
21-Dec-2017 05:00:00, NaN  
21-Dec-2017 06:00:00, NaN  
21-Dec-2017 07:00:00, NaN  
21-Dec-2017 08:00:00, NaN  
21-Dec-2017 09:00:00, NaN  
21-Dec-2017 10:00:00, NaN  
21-Dec-2017 11:00:00, NaN  
21-Dec-2017 12:00:00, NaN  
21-Dec-2017 13:00:00, NaN  
21-Dec-2017 14:00:00, NaN  
21-Dec-2017 15:00:00, NaN  
21-Dec-2017 16:00:00, NaN  
21-Dec-2017 17:00:00, NaN  
21-Dec-2017 18:00:00, NaN  
21-Dec-2017 19:00:00, NaN  
21-Dec-2017 20:00:00, NaN  
21-Dec-2017 21:00:00, NaN  
21-Dec-2017 22:00:00, NaN  
21-Dec-2017 23:00:00, NaN  
22-Dec-2017, NaN  
22-Dec-2017 01:00:00, NaN  
22-Dec-2017 02:00:00, NaN  
22-Dec-2017 03:00:00, NaN  
22-Dec-2017 04:00:00, NaN  
22-Dec-2017 05:00:00, NaN  
22-Dec-2017 06:00:00, NaN  
22-Dec-2017 07:00:00, NaN  
22-Dec-2017 08:00:00, NaN  
22-Dec-2017 09:00:00, NaN  
22-Dec-2017 10:00:00, NaN  
22-Dec-2017 11:00:00, NaN  
22-Dec-2017 12:00:00, NaN  
22-Dec-2017 13:00:00, NaN  
22-Dec-2017 14:00:00, NaN  
22-Dec-2017 15:00:00, NaN  
22-Dec-2017 16:00:00, NaN  
22-Dec-2017 17:00:00, NaN  
22-Dec-2017 18:00:00, NaN  
22-Dec-2017 19:00:00, NaN  
22-Dec-2017 20:00:00, NaN  
22-Dec-2017 21:00:00, NaN  
22-Dec-2017 22:00:00, NaN

22-Dec-2017 23:00:00, NaN  
23-Dec-2017, NaN  
23-Dec-2017 01:00:00, NaN  
23-Dec-2017 02:00:00, NaN  
23-Dec-2017 03:00:00, NaN  
23-Dec-2017 04:00:00, NaN  
23-Dec-2017 05:00:00, NaN  
23-Dec-2017 06:00:00, NaN  
23-Dec-2017 07:00:00, NaN  
23-Dec-2017 08:00:00, NaN  
23-Dec-2017 09:00:00, NaN  
23-Dec-2017 10:00:00, NaN  
23-Dec-2017 11:00:00, NaN  
23-Dec-2017 12:00:00, NaN  
23-Dec-2017 13:00:00, NaN  
23-Dec-2017 14:00:00, NaN  
23-Dec-2017 15:00:00, NaN  
23-Dec-2017 16:00:00, NaN  
23-Dec-2017 17:00:00, NaN  
23-Dec-2017 18:00:00, NaN  
23-Dec-2017 19:00:00, NaN  
23-Dec-2017 20:00:00, NaN  
23-Dec-2017 21:00:00, NaN  
23-Dec-2017 22:00:00, NaN  
23-Dec-2017 23:00:00, NaN  
24-Dec-2017, NaN  
24-Dec-2017 01:00:00, NaN  
24-Dec-2017 02:00:00, NaN  
24-Dec-2017 03:00:00, NaN  
24-Dec-2017 04:00:00, NaN  
24-Dec-2017 05:00:00, NaN  
24-Dec-2017 06:00:00, NaN  
24-Dec-2017 07:00:00, NaN  
24-Dec-2017 08:00:00, NaN  
24-Dec-2017 09:00:00, NaN  
24-Dec-2017 10:00:00, NaN  
24-Dec-2017 11:00:00, NaN  
24-Dec-2017 12:00:00, NaN  
24-Dec-2017 13:00:00, NaN  
24-Dec-2017 14:00:00, NaN  
24-Dec-2017 15:00:00, NaN  
24-Dec-2017 16:00:00, NaN  
24-Dec-2017 17:00:00, NaN  
24-Dec-2017 18:00:00, NaN  
24-Dec-2017 19:00:00, NaN  
24-Dec-2017 20:00:00, NaN  
24-Dec-2017 21:00:00, NaN  
24-Dec-2017 22:00:00, NaN  
24-Dec-2017 23:00:00, NaN  
25-Dec-2017, NaN  
25-Dec-2017 01:00:00, NaN  
25-Dec-2017 02:00:00, NaN  
25-Dec-2017 03:00:00, NaN  
25-Dec-2017 04:00:00, NaN  
25-Dec-2017 05:00:00, NaN  
25-Dec-2017 06:00:00, NaN  
25-Dec-2017 07:00:00, NaN  
25-Dec-2017 08:00:00, NaN  
25-Dec-2017 09:00:00, NaN  
25-Dec-2017 10:00:00, NaN  
25-Dec-2017 11:00:00, NaN  
25-Dec-2017 12:00:00, NaN  
25-Dec-2017 13:00:00, NaN  
25-Dec-2017 14:00:00, NaN



25-Dec-2017 15:00:00, NaN  
25-Dec-2017 16:00:00, NaN  
25-Dec-2017 17:00:00, NaN  
25-Dec-2017 18:00:00, NaN  
25-Dec-2017 19:00:00, NaN  
25-Dec-2017 20:00:00, NaN  
25-Dec-2017 21:00:00, NaN  
25-Dec-2017 22:00:00, NaN  
25-Dec-2017 23:00:00, NaN  
26-Dec-2017, NaN  
26-Dec-2017 01:00:00, NaN  
26-Dec-2017 02:00:00, NaN  
26-Dec-2017 03:00:00, NaN  
26-Dec-2017 04:00:00, NaN  
26-Dec-2017 05:00:00, NaN  
26-Dec-2017 06:00:00, NaN  
26-Dec-2017 07:00:00, NaN  
26-Dec-2017 08:00:00, NaN  
26-Dec-2017 09:00:00, NaN  
26-Dec-2017 10:00:00, NaN  
26-Dec-2017 11:00:00, NaN  
26-Dec-2017 12:00:00, NaN  
26-Dec-2017 13:00:00, NaN  
26-Dec-2017 14:00:00, NaN  
26-Dec-2017 15:00:00, NaN  
26-Dec-2017 16:00:00, NaN  
26-Dec-2017 17:00:00, NaN  
26-Dec-2017 18:00:00, NaN  
26-Dec-2017 19:00:00, NaN  
26-Dec-2017 20:00:00, NaN  
26-Dec-2017 21:00:00, NaN  
26-Dec-2017 22:00:00, NaN  
26-Dec-2017 23:00:00, NaN  
27-Dec-2017, NaN  
27-Dec-2017 01:00:00, NaN  
27-Dec-2017 02:00:00, NaN  
27-Dec-2017 03:00:00, NaN  
27-Dec-2017 04:00:00, NaN  
27-Dec-2017 05:00:00, NaN  
27-Dec-2017 06:00:00, NaN  
27-Dec-2017 07:00:00, NaN  
27-Dec-2017 08:00:00, NaN  
27-Dec-2017 09:00:00, NaN  
27-Dec-2017 10:00:00, NaN  
27-Dec-2017 11:00:00, NaN  
27-Dec-2017 12:00:00, NaN  
27-Dec-2017 13:00:00, NaN  
27-Dec-2017 14:00:00, NaN  
27-Dec-2017 15:00:00, NaN  
27-Dec-2017 16:00:00, NaN  
27-Dec-2017 17:00:00, NaN  
27-Dec-2017 18:00:00, NaN  
27-Dec-2017 19:00:00, NaN  
27-Dec-2017 20:00:00, NaN  
27-Dec-2017 21:00:00, NaN  
27-Dec-2017 22:00:00, NaN  
27-Dec-2017 23:00:00, NaN  
28-Dec-2017, NaN  
28-Dec-2017 01:00:00, NaN  
28-Dec-2017 02:00:00, NaN  
28-Dec-2017 03:00:00, NaN  
28-Dec-2017 04:00:00, NaN  
28-Dec-2017 05:00:00, NaN  
28-Dec-2017 06:00:00, NaN

28-Dec-2017 07:00:00, NaN  
28-Dec-2017 08:00:00, NaN  
28-Dec-2017 09:00:00, NaN  
28-Dec-2017 10:00:00, NaN  
28-Dec-2017 11:00:00, NaN  
28-Dec-2017 12:00:00, NaN  
28-Dec-2017 13:00:00, NaN  
28-Dec-2017 14:00:00, NaN  
28-Dec-2017 15:00:00, NaN  
28-Dec-2017 16:00:00, NaN  
28-Dec-2017 17:00:00, NaN  
28-Dec-2017 18:00:00, NaN  
28-Dec-2017 19:00:00, NaN  
28-Dec-2017 20:00:00, NaN  
28-Dec-2017 21:00:00, NaN  
28-Dec-2017 22:00:00, NaN  
28-Dec-2017 23:00:00, NaN  
29-Dec-2017, NaN  
29-Dec-2017 01:00:00, NaN  
29-Dec-2017 02:00:00, NaN  
29-Dec-2017 03:00:00, NaN  
29-Dec-2017 04:00:00, NaN  
29-Dec-2017 05:00:00, NaN  
29-Dec-2017 06:00:00, NaN  
29-Dec-2017 07:00:00, NaN  
29-Dec-2017 08:00:00, NaN  
29-Dec-2017 09:00:00, NaN  
29-Dec-2017 10:00:00, NaN  
29-Dec-2017 11:00:00, NaN  
29-Dec-2017 12:00:00, NaN  
29-Dec-2017 13:00:00, NaN  
29-Dec-2017 14:00:00, NaN  
29-Dec-2017 15:00:00, NaN  
29-Dec-2017 16:00:00, NaN  
29-Dec-2017 17:00:00, NaN  
29-Dec-2017 18:00:00, NaN  
29-Dec-2017 19:00:00, NaN  
29-Dec-2017 20:00:00, NaN  
29-Dec-2017 21:00:00, NaN  
29-Dec-2017 22:00:00, NaN  
29-Dec-2017 23:00:00, NaN  
30-Dec-2017, NaN  
30-Dec-2017 01:00:00, NaN  
30-Dec-2017 02:00:00, NaN  
30-Dec-2017 03:00:00, NaN  
30-Dec-2017 04:00:00, NaN  
30-Dec-2017 05:00:00, NaN  
30-Dec-2017 06:00:00, NaN  
30-Dec-2017 07:00:00, NaN  
30-Dec-2017 08:00:00, NaN  
30-Dec-2017 09:00:00, NaN  
30-Dec-2017 10:00:00, NaN  
30-Dec-2017 11:00:00, NaN  
30-Dec-2017 12:00:00, NaN  
30-Dec-2017 13:00:00, NaN  
30-Dec-2017 14:00:00, NaN  
30-Dec-2017 15:00:00, NaN  
30-Dec-2017 16:00:00, NaN  
30-Dec-2017 17:00:00, NaN  
30-Dec-2017 18:00:00, NaN  
30-Dec-2017 19:00:00, NaN  
30-Dec-2017 20:00:00, NaN  
30-Dec-2017 21:00:00, NaN  
30-Dec-2017 22:00:00, NaN

30-Dec-2017 23:00:00, NaN  
31-Dec-2017, NaN  
31-Dec-2017 01:00:00, NaN  
31-Dec-2017 02:00:00, NaN  
31-Dec-2017 03:00:00, NaN  
31-Dec-2017 04:00:00, NaN  
31-Dec-2017 05:00:00, NaN  
31-Dec-2017 06:00:00, NaN  
31-Dec-2017 07:00:00, NaN  
31-Dec-2017 08:00:00, NaN  
31-Dec-2017 09:00:00, NaN  
31-Dec-2017 10:00:00, NaN  
31-Dec-2017 11:00:00, NaN  
31-Dec-2017 12:00:00, NaN  
31-Dec-2017 13:00:00, NaN  
31-Dec-2017 14:00:00, NaN  
31-Dec-2017 15:00:00, NaN  
31-Dec-2017 16:00:00, NaN  
31-Dec-2017 17:00:00, NaN  
31-Dec-2017 18:00:00, NaN  
31-Dec-2017 19:00:00, NaN  
31-Dec-2017 20:00:00, NaN  
31-Dec-2017 21:00:00, NaN  
31-Dec-2017 22:00:00, NaN  
31-Dec-2017 23:00:00, NaN  
01-Jan-2018, NaN  
01-Jan-2018 01:00:00, NaN  
01-Jan-2018 02:00:00, NaN  
01-Jan-2018 03:00:00, NaN  
01-Jan-2018 04:00:00, NaN  
01-Jan-2018 05:00:00, NaN  
01-Jan-2018 06:00:00, NaN  
01-Jan-2018 07:00:00, NaN  
01-Jan-2018 08:00:00, NaN  
01-Jan-2018 09:00:00, NaN  
01-Jan-2018 10:00:00, NaN  
01-Jan-2018 11:00:00, NaN  
01-Jan-2018 12:00:00, NaN  
01-Jan-2018 13:00:00, NaN  
01-Jan-2018 14:00:00, NaN  
01-Jan-2018 15:00:00, NaN  
01-Jan-2018 16:00:00, NaN  
01-Jan-2018 17:00:00, NaN  
01-Jan-2018 18:00:00, NaN  
01-Jan-2018 19:00:00, NaN  
01-Jan-2018 20:00:00, NaN  
01-Jan-2018 21:00:00, NaN  
01-Jan-2018 22:00:00, NaN  
01-Jan-2018 23:00:00, NaN  
02-Jan-2018, NaN  
02-Jan-2018 01:00:00, NaN  
02-Jan-2018 02:00:00, NaN  
02-Jan-2018 03:00:00, NaN  
02-Jan-2018 04:00:00, NaN  
02-Jan-2018 05:00:00, NaN  
02-Jan-2018 06:00:00, NaN  
02-Jan-2018 07:00:00, NaN  
02-Jan-2018 08:00:00, NaN  
02-Jan-2018 09:00:00, NaN  
02-Jan-2018 10:00:00, NaN  
02-Jan-2018 11:00:00, NaN  
02-Jan-2018 12:00:00, NaN  
02-Jan-2018 13:00:00, NaN  
02-Jan-2018 14:00:00, NaN

02-Jan-2018 15:00:00, NaN  
02-Jan-2018 16:00:00, NaN  
02-Jan-2018 17:00:00, NaN  
02-Jan-2018 18:00:00, NaN  
02-Jan-2018 19:00:00, NaN  
02-Jan-2018 20:00:00, NaN  
02-Jan-2018 21:00:00, NaN  
02-Jan-2018 22:00:00, NaN  
02-Jan-2018 23:00:00, NaN  
03-Jan-2018, NaN  
03-Jan-2018 01:00:00, NaN  
03-Jan-2018 02:00:00, NaN  
03-Jan-2018 03:00:00, NaN  
03-Jan-2018 04:00:00, NaN  
03-Jan-2018 05:00:00, NaN  
03-Jan-2018 06:00:00, NaN  
03-Jan-2018 07:00:00, NaN  
03-Jan-2018 08:00:00, NaN  
03-Jan-2018 09:00:00, NaN  
03-Jan-2018 10:00:00, NaN  
03-Jan-2018 11:00:00, NaN  
03-Jan-2018 12:00:00, NaN  
03-Jan-2018 13:00:00, NaN  
03-Jan-2018 14:00:00, NaN  
03-Jan-2018 15:00:00, NaN  
03-Jan-2018 16:00:00, NaN  
03-Jan-2018 17:00:00, NaN  
03-Jan-2018 18:00:00, NaN  
03-Jan-2018 19:00:00, NaN  
03-Jan-2018 20:00:00, NaN  
03-Jan-2018 21:00:00, NaN  
03-Jan-2018 22:00:00, NaN  
03-Jan-2018 23:00:00, NaN  
04-Jan-2018, NaN  
04-Jan-2018 01:00:00, NaN  
04-Jan-2018 02:00:00, NaN  
04-Jan-2018 03:00:00, NaN  
04-Jan-2018 04:00:00, NaN  
04-Jan-2018 05:00:00, NaN  
04-Jan-2018 06:00:00, NaN  
04-Jan-2018 07:00:00, NaN  
04-Jan-2018 08:00:00, NaN  
04-Jan-2018 09:00:00, NaN  
04-Jan-2018 10:00:00, NaN  
04-Jan-2018 11:00:00, NaN  
04-Jan-2018 12:00:00, NaN  
04-Jan-2018 13:00:00, NaN  
04-Jan-2018 14:00:00, NaN  
04-Jan-2018 15:00:00, NaN  
04-Jan-2018 16:00:00, NaN  
04-Jan-2018 17:00:00, NaN  
04-Jan-2018 18:00:00, NaN  
04-Jan-2018 19:00:00, NaN  
04-Jan-2018 20:00:00, NaN  
04-Jan-2018 21:00:00, NaN  
04-Jan-2018 22:00:00, NaN  
04-Jan-2018 23:00:00, NaN  
05-Jan-2018, NaN  
05-Jan-2018 01:00:00, NaN  
05-Jan-2018 02:00:00, NaN  
05-Jan-2018 03:00:00, NaN  
05-Jan-2018 04:00:00, NaN  
05-Jan-2018 05:00:00, NaN  
05-Jan-2018 06:00:00, NaN

05-Jan-2018 07:00:00, NaN  
05-Jan-2018 08:00:00, NaN  
05-Jan-2018 09:00:00, NaN  
05-Jan-2018 10:00:00, NaN  
05-Jan-2018 11:00:00, NaN  
05-Jan-2018 12:00:00, NaN  
05-Jan-2018 13:00:00, NaN  
05-Jan-2018 14:00:00, NaN  
05-Jan-2018 15:00:00, NaN  
05-Jan-2018 16:00:00, NaN  
05-Jan-2018 17:00:00, NaN  
05-Jan-2018 18:00:00, NaN  
05-Jan-2018 19:00:00, NaN  
05-Jan-2018 20:00:00, NaN  
05-Jan-2018 21:00:00, NaN  
05-Jan-2018 22:00:00, NaN  
05-Jan-2018 23:00:00, NaN  
06-Jan-2018, NaN  
06-Jan-2018 01:00:00, NaN  
06-Jan-2018 02:00:00, NaN  
06-Jan-2018 03:00:00, NaN  
06-Jan-2018 04:00:00, NaN  
06-Jan-2018 05:00:00, NaN  
06-Jan-2018 06:00:00, NaN  
06-Jan-2018 07:00:00, NaN  
06-Jan-2018 08:00:00, NaN  
06-Jan-2018 09:00:00, NaN  
06-Jan-2018 10:00:00, NaN  
06-Jan-2018 11:00:00, NaN  
06-Jan-2018 12:00:00, NaN  
06-Jan-2018 13:00:00, NaN  
06-Jan-2018 14:00:00, NaN  
06-Jan-2018 15:00:00, NaN  
06-Jan-2018 16:00:00, NaN  
06-Jan-2018 17:00:00, NaN  
06-Jan-2018 18:00:00, NaN  
06-Jan-2018 19:00:00, NaN  
06-Jan-2018 20:00:00, NaN  
06-Jan-2018 21:00:00, NaN  
06-Jan-2018 22:00:00, NaN  
06-Jan-2018 23:00:00, NaN  
07-Jan-2018, NaN  
07-Jan-2018 01:00:00, NaN  
07-Jan-2018 02:00:00, NaN  
07-Jan-2018 03:00:00, NaN  
07-Jan-2018 04:00:00, NaN  
07-Jan-2018 05:00:00, NaN  
07-Jan-2018 06:00:00, NaN  
07-Jan-2018 07:00:00, NaN  
07-Jan-2018 08:00:00, NaN  
07-Jan-2018 09:00:00, NaN  
07-Jan-2018 10:00:00, NaN  
07-Jan-2018 11:00:00, NaN  
07-Jan-2018 12:00:00, NaN  
07-Jan-2018 13:00:00, NaN  
07-Jan-2018 14:00:00, NaN  
07-Jan-2018 15:00:00, NaN  
07-Jan-2018 16:00:00, NaN  
07-Jan-2018 17:00:00, NaN  
07-Jan-2018 18:00:00, NaN  
07-Jan-2018 19:00:00, NaN  
07-Jan-2018 20:00:00, NaN  
07-Jan-2018 21:00:00, NaN  
07-Jan-2018 22:00:00, NaN

07-Jan-2018 23:00:00, NaN  
08-Jan-2018, NaN  
08-Jan-2018 01:00:00, NaN  
08-Jan-2018 02:00:00, NaN  
08-Jan-2018 03:00:00, NaN  
08-Jan-2018 04:00:00, NaN  
08-Jan-2018 05:00:00, NaN  
08-Jan-2018 06:00:00, NaN  
08-Jan-2018 07:00:00, NaN  
08-Jan-2018 08:00:00, NaN  
08-Jan-2018 09:00:00, NaN  
08-Jan-2018 10:00:00, NaN  
08-Jan-2018 11:00:00, NaN  
08-Jan-2018 12:00:00, NaN  
08-Jan-2018 13:00:00, NaN  
08-Jan-2018 14:00:00, NaN  
08-Jan-2018 15:00:00, NaN  
08-Jan-2018 16:00:00, NaN  
08-Jan-2018 17:00:00, NaN  
08-Jan-2018 18:00:00, NaN  
08-Jan-2018 19:00:00, NaN  
08-Jan-2018 20:00:00, NaN  
08-Jan-2018 21:00:00, NaN  
08-Jan-2018 22:00:00, NaN  
08-Jan-2018 23:00:00, NaN  
09-Jan-2018, NaN  
09-Jan-2018 01:00:00, NaN  
09-Jan-2018 02:00:00, NaN  
09-Jan-2018 03:00:00, NaN  
09-Jan-2018 04:00:00, NaN  
09-Jan-2018 05:00:00, NaN  
09-Jan-2018 06:00:00, NaN  
09-Jan-2018 07:00:00, NaN  
09-Jan-2018 08:00:00, NaN  
09-Jan-2018 09:00:00, NaN  
09-Jan-2018 10:00:00, NaN  
09-Jan-2018 11:00:00, NaN  
09-Jan-2018 12:00:00, NaN  
09-Jan-2018 13:00:00, NaN  
09-Jan-2018 14:00:00, NaN  
09-Jan-2018 15:00:00, NaN  
09-Jan-2018 16:00:00, NaN  
09-Jan-2018 17:00:00, NaN  
09-Jan-2018 18:00:00, NaN  
09-Jan-2018 19:00:00, NaN  
09-Jan-2018 20:00:00, NaN  
09-Jan-2018 21:00:00, NaN  
09-Jan-2018 22:00:00, NaN  
09-Jan-2018 23:00:00, NaN  
10-Jan-2018, NaN  
10-Jan-2018 01:00:00, NaN  
10-Jan-2018 02:00:00, NaN  
10-Jan-2018 03:00:00, NaN  
10-Jan-2018 04:00:00, NaN  
10-Jan-2018 05:00:00, NaN  
10-Jan-2018 06:00:00, NaN  
10-Jan-2018 07:00:00, NaN  
10-Jan-2018 08:00:00, NaN  
10-Jan-2018 09:00:00, NaN  
10-Jan-2018 10:00:00, NaN  
10-Jan-2018 11:00:00, NaN  
10-Jan-2018 12:00:00, NaN  
10-Jan-2018 13:00:00, NaN  
10-Jan-2018 14:00:00, NaN

10-Jan-2018 15:00:00, NaN  
10-Jan-2018 16:00:00, NaN  
10-Jan-2018 17:00:00, NaN  
10-Jan-2018 18:00:00, NaN  
10-Jan-2018 19:00:00, NaN  
10-Jan-2018 20:00:00, NaN  
10-Jan-2018 21:00:00, NaN  
10-Jan-2018 22:00:00, NaN  
10-Jan-2018 23:00:00, NaN  
11-Jan-2018, NaN  
11-Jan-2018 01:00:00, NaN  
11-Jan-2018 02:00:00, NaN  
11-Jan-2018 03:00:00, NaN  
11-Jan-2018 04:00:00, NaN  
11-Jan-2018 05:00:00, NaN  
11-Jan-2018 06:00:00, NaN  
11-Jan-2018 07:00:00, NaN  
11-Jan-2018 08:00:00, NaN  
11-Jan-2018 09:00:00, NaN  
11-Jan-2018 10:00:00, NaN  
11-Jan-2018 11:00:00, NaN  
11-Jan-2018 12:00:00, NaN  
11-Jan-2018 13:00:00, NaN  
11-Jan-2018 14:00:00, NaN  
11-Jan-2018 15:00:00, NaN  
11-Jan-2018 16:00:00, NaN  
11-Jan-2018 17:00:00, NaN  
11-Jan-2018 18:00:00, NaN  
11-Jan-2018 19:00:00, NaN  
11-Jan-2018 20:00:00, NaN  
11-Jan-2018 21:00:00, NaN  
11-Jan-2018 22:00:00, NaN  
11-Jan-2018 23:00:00, NaN  
12-Jan-2018, NaN  
12-Jan-2018 01:00:00, NaN  
12-Jan-2018 02:00:00, NaN  
12-Jan-2018 03:00:00, NaN  
12-Jan-2018 04:00:00, NaN  
12-Jan-2018 05:00:00, NaN  
12-Jan-2018 06:00:00, NaN  
12-Jan-2018 07:00:00, NaN  
12-Jan-2018 08:00:00, NaN  
12-Jan-2018 09:00:00, NaN  
12-Jan-2018 10:00:00, NaN  
12-Jan-2018 11:00:00, NaN  
12-Jan-2018 12:00:00, NaN  
12-Jan-2018 13:00:00, NaN  
12-Jan-2018 14:00:00, NaN  
12-Jan-2018 15:00:00, NaN  
12-Jan-2018 16:00:00, NaN  
12-Jan-2018 17:00:00, NaN  
12-Jan-2018 18:00:00, NaN  
12-Jan-2018 19:00:00, NaN  
12-Jan-2018 20:00:00, NaN  
12-Jan-2018 21:00:00, NaN  
12-Jan-2018 22:00:00, NaN  
12-Jan-2018 23:00:00, NaN  
13-Jan-2018, NaN  
13-Jan-2018 01:00:00, NaN  
13-Jan-2018 02:00:00, NaN  
13-Jan-2018 03:00:00, NaN  
13-Jan-2018 04:00:00, NaN  
13-Jan-2018 05:00:00, NaN  
13-Jan-2018 06:00:00, NaN

13-Jan-2018 07:00:00, NaN  
13-Jan-2018 08:00:00, NaN  
13-Jan-2018 09:00:00, NaN  
13-Jan-2018 10:00:00, NaN  
13-Jan-2018 11:00:00, NaN  
13-Jan-2018 12:00:00, NaN  
13-Jan-2018 13:00:00, NaN  
13-Jan-2018 14:00:00, NaN  
13-Jan-2018 15:00:00, NaN  
13-Jan-2018 16:00:00, NaN  
13-Jan-2018 17:00:00, NaN  
13-Jan-2018 18:00:00, NaN  
13-Jan-2018 19:00:00, NaN  
13-Jan-2018 20:00:00, NaN  
13-Jan-2018 21:00:00, NaN  
13-Jan-2018 22:00:00, NaN  
13-Jan-2018 23:00:00, NaN  
14-Jan-2018, NaN  
14-Jan-2018 01:00:00, NaN  
14-Jan-2018 02:00:00, NaN  
14-Jan-2018 03:00:00, NaN  
14-Jan-2018 04:00:00, NaN  
14-Jan-2018 05:00:00, NaN  
14-Jan-2018 06:00:00, NaN  
14-Jan-2018 07:00:00, NaN  
14-Jan-2018 08:00:00, NaN  
14-Jan-2018 09:00:00, NaN  
14-Jan-2018 10:00:00, NaN  
14-Jan-2018 11:00:00, NaN  
14-Jan-2018 12:00:00, NaN  
14-Jan-2018 13:00:00, NaN  
14-Jan-2018 14:00:00, NaN  
14-Jan-2018 15:00:00, NaN  
14-Jan-2018 16:00:00, NaN  
14-Jan-2018 17:00:00, NaN  
14-Jan-2018 18:00:00, NaN  
14-Jan-2018 19:00:00, NaN  
14-Jan-2018 20:00:00, NaN  
14-Jan-2018 21:00:00, NaN  
14-Jan-2018 22:00:00, NaN  
14-Jan-2018 23:00:00, NaN  
15-Jan-2018, NaN  
15-Jan-2018 01:00:00, NaN  
15-Jan-2018 02:00:00, NaN  
15-Jan-2018 03:00:00, NaN  
15-Jan-2018 04:00:00, NaN  
15-Jan-2018 05:00:00, NaN  
15-Jan-2018 06:00:00, NaN  
15-Jan-2018 07:00:00, NaN  
15-Jan-2018 08:00:00, NaN  
15-Jan-2018 09:00:00, NaN  
15-Jan-2018 10:00:00, NaN  
15-Jan-2018 11:00:00, NaN  
15-Jan-2018 12:00:00, NaN  
15-Jan-2018 13:00:00, NaN  
15-Jan-2018 14:00:00, NaN  
15-Jan-2018 15:00:00, NaN  
15-Jan-2018 16:00:00, NaN  
15-Jan-2018 17:00:00, NaN  
15-Jan-2018 18:00:00, NaN  
15-Jan-2018 19:00:00, NaN  
15-Jan-2018 20:00:00, NaN  
15-Jan-2018 21:00:00, NaN  
15-Jan-2018 22:00:00, NaN



15-Jan-2018 23:00:00, NaN  
16-Jan-2018, NaN  
16-Jan-2018 01:00:00, NaN  
16-Jan-2018 02:00:00, NaN  
16-Jan-2018 03:00:00, NaN  
16-Jan-2018 04:00:00, NaN  
16-Jan-2018 05:00:00, NaN  
16-Jan-2018 06:00:00, NaN  
16-Jan-2018 07:00:00, NaN  
16-Jan-2018 08:00:00, NaN  
16-Jan-2018 09:00:00, NaN  
16-Jan-2018 10:00:00, NaN  
16-Jan-2018 11:00:00, NaN  
16-Jan-2018 12:00:00, NaN  
16-Jan-2018 13:00:00, NaN  
16-Jan-2018 14:00:00, NaN  
16-Jan-2018 15:00:00, NaN  
16-Jan-2018 16:00:00, NaN  
16-Jan-2018 17:00:00, NaN  
16-Jan-2018 18:00:00, NaN  
16-Jan-2018 19:00:00, NaN  
16-Jan-2018 20:00:00, NaN  
16-Jan-2018 21:00:00, NaN  
16-Jan-2018 22:00:00, NaN  
16-Jan-2018 23:00:00, NaN  
17-Jan-2018, NaN  
17-Jan-2018 01:00:00, NaN  
17-Jan-2018 02:00:00, NaN  
17-Jan-2018 03:00:00, NaN  
17-Jan-2018 04:00:00, NaN  
17-Jan-2018 05:00:00, NaN  
17-Jan-2018 06:00:00, NaN  
17-Jan-2018 07:00:00, NaN  
17-Jan-2018 08:00:00, NaN  
17-Jan-2018 09:00:00, NaN  
17-Jan-2018 10:00:00, NaN  
17-Jan-2018 11:00:00, NaN  
17-Jan-2018 12:00:00, NaN  
17-Jan-2018 13:00:00, NaN  
17-Jan-2018 14:00:00, NaN  
17-Jan-2018 15:00:00, NaN  
17-Jan-2018 16:00:00, NaN  
17-Jan-2018 17:00:00, NaN  
17-Jan-2018 18:00:00, NaN  
17-Jan-2018 19:00:00, NaN  
17-Jan-2018 20:00:00, NaN  
17-Jan-2018 21:00:00, NaN  
17-Jan-2018 22:00:00, NaN  
17-Jan-2018 23:00:00, NaN  
18-Jan-2018, NaN  
18-Jan-2018 01:00:00, NaN  
18-Jan-2018 02:00:00, NaN  
18-Jan-2018 03:00:00, NaN  
18-Jan-2018 04:00:00, NaN  
18-Jan-2018 05:00:00, NaN  
18-Jan-2018 06:00:00, NaN  
18-Jan-2018 07:00:00, NaN  
18-Jan-2018 08:00:00, NaN  
18-Jan-2018 09:00:00, NaN  
18-Jan-2018 10:00:00, NaN  
18-Jan-2018 11:00:00, NaN  
18-Jan-2018 12:00:00, NaN  
18-Jan-2018 13:00:00, NaN  
18-Jan-2018 14:00:00, NaN

18-Jan-2018 15:00:00, NaN  
18-Jan-2018 16:00:00, NaN  
18-Jan-2018 17:00:00, NaN  
18-Jan-2018 18:00:00, NaN  
18-Jan-2018 19:00:00, NaN  
18-Jan-2018 20:00:00, NaN  
18-Jan-2018 21:00:00, NaN  
18-Jan-2018 22:00:00, NaN  
18-Jan-2018 23:00:00, NaN  
19-Jan-2018, NaN  
19-Jan-2018 01:00:00, NaN  
19-Jan-2018 02:00:00, NaN  
19-Jan-2018 03:00:00, NaN  
19-Jan-2018 04:00:00, NaN  
19-Jan-2018 05:00:00, NaN  
19-Jan-2018 06:00:00, NaN  
19-Jan-2018 07:00:00, NaN  
19-Jan-2018 08:00:00, NaN  
19-Jan-2018 09:00:00, NaN  
19-Jan-2018 10:00:00, NaN  
19-Jan-2018 11:00:00, NaN  
19-Jan-2018 12:00:00, NaN  
19-Jan-2018 13:00:00, NaN  
19-Jan-2018 14:00:00, NaN  
19-Jan-2018 15:00:00, NaN  
19-Jan-2018 16:00:00, NaN  
19-Jan-2018 17:00:00, NaN  
19-Jan-2018 18:00:00, NaN  
19-Jan-2018 19:00:00, NaN  
19-Jan-2018 20:00:00, NaN  
19-Jan-2018 21:00:00, NaN  
19-Jan-2018 22:00:00, NaN  
19-Jan-2018 23:00:00, NaN  
20-Jan-2018, NaN  
20-Jan-2018 01:00:00, NaN  
20-Jan-2018 02:00:00, NaN  
20-Jan-2018 03:00:00, NaN  
20-Jan-2018 04:00:00, NaN  
20-Jan-2018 05:00:00, NaN  
20-Jan-2018 06:00:00, NaN  
20-Jan-2018 07:00:00, NaN  
20-Jan-2018 08:00:00, NaN  
20-Jan-2018 09:00:00, NaN  
20-Jan-2018 10:00:00, NaN  
20-Jan-2018 11:00:00, NaN  
20-Jan-2018 12:00:00, NaN  
20-Jan-2018 13:00:00, NaN  
20-Jan-2018 14:00:00, NaN  
20-Jan-2018 15:00:00, NaN  
20-Jan-2018 16:00:00, NaN  
20-Jan-2018 17:00:00, NaN  
20-Jan-2018 18:00:00, NaN  
20-Jan-2018 19:00:00, NaN  
20-Jan-2018 20:00:00, NaN  
20-Jan-2018 21:00:00, NaN  
20-Jan-2018 22:00:00, NaN  
20-Jan-2018 23:00:00, NaN  
21-Jan-2018, NaN  
21-Jan-2018 01:00:00, NaN  
21-Jan-2018 02:00:00, NaN  
21-Jan-2018 03:00:00, NaN  
21-Jan-2018 04:00:00, NaN  
21-Jan-2018 05:00:00, NaN  
21-Jan-2018 06:00:00, NaN

|              |           |     |
|--------------|-----------|-----|
| 21-Jan-2018  | 07:00:00, | NaN |
| 21-Jan-2018  | 08:00:00, | NaN |
| 21-Jan-2018  | 09:00:00, | NaN |
| 21-Jan-2018  | 10:00:00, | NaN |
| 21-Jan-2018  | 11:00:00, | NaN |
| 21-Jan-2018  | 12:00:00, | NaN |
| 21-Jan-2018  | 13:00:00, | NaN |
| 21-Jan-2018  | 14:00:00, | NaN |
| 21-Jan-2018  | 15:00:00, | NaN |
| 21-Jan-2018  | 16:00:00, | NaN |
| 21-Jan-2018  | 17:00:00, | NaN |
| 21-Jan-2018  | 18:00:00, | NaN |
| 21-Jan-2018  | 19:00:00, | NaN |
| 21-Jan-2018  | 20:00:00, | NaN |
| 21-Jan-2018  | 21:00:00, | NaN |
| 21-Jan-2018  | 22:00:00, | NaN |
| 21-Jan-2018  | 23:00:00, | NaN |
| 22-Jan-2018, | NaN       |     |
| 22-Jan-2018  | 01:00:00, | NaN |
| 22-Jan-2018  | 02:00:00, | NaN |
| 22-Jan-2018  | 03:00:00, | NaN |
| 22-Jan-2018  | 04:00:00, | NaN |
| 22-Jan-2018  | 05:00:00, | NaN |
| 22-Jan-2018  | 06:00:00, | NaN |
| 22-Jan-2018  | 07:00:00, | NaN |
| 22-Jan-2018  | 08:00:00, | NaN |
| 22-Jan-2018  | 09:00:00, | NaN |
| 22-Jan-2018  | 10:00:00, | NaN |
| 22-Jan-2018  | 11:00:00, | NaN |
| 22-Jan-2018  | 12:00:00, | NaN |
| 22-Jan-2018  | 13:00:00, | NaN |
| 22-Jan-2018  | 14:00:00, | NaN |
| 22-Jan-2018  | 15:00:00, | NaN |
| 22-Jan-2018  | 16:00:00, | NaN |
| 22-Jan-2018  | 17:00:00, | NaN |
| 22-Jan-2018  | 18:00:00, | NaN |
| 22-Jan-2018  | 19:00:00, | NaN |
| 22-Jan-2018  | 20:00:00, | NaN |
| 22-Jan-2018  | 21:00:00, | NaN |
| 22-Jan-2018  | 22:00:00, | NaN |
| 22-Jan-2018  | 23:00:00, | NaN |
| 23-Jan-2018, | NaN       |     |
| 23-Jan-2018  | 01:00:00, | NaN |
| 23-Jan-2018  | 02:00:00, | NaN |
| 23-Jan-2018  | 03:00:00, | NaN |
| 23-Jan-2018  | 04:00:00, | NaN |
| 23-Jan-2018  | 05:00:00, | NaN |
| 23-Jan-2018  | 06:00:00, | NaN |
| 23-Jan-2018  | 07:00:00, | NaN |
| 23-Jan-2018  | 08:00:00, | NaN |
| 23-Jan-2018  | 09:00:00, | NaN |
| 23-Jan-2018  | 10:00:00, | NaN |
| 23-Jan-2018  | 11:00:00, | NaN |
| 23-Jan-2018  | 12:00:00, | NaN |
| 23-Jan-2018  | 13:00:00, | NaN |
| 23-Jan-2018  | 14:00:00, | NaN |
| 23-Jan-2018  | 15:00:00, | NaN |
| 23-Jan-2018  | 16:00:00, | NaN |
| 23-Jan-2018  | 17:00:00, | NaN |
| 23-Jan-2018  | 18:00:00, | NaN |
| 23-Jan-2018  | 19:00:00, | NaN |
| 23-Jan-2018  | 20:00:00, | NaN |
| 23-Jan-2018  | 21:00:00, | NaN |
| 23-Jan-2018  | 22:00:00, | NaN |

23-Jan-2018 23:00:00, NaN  
24-Jan-2018, NaN  
24-Jan-2018 01:00:00, NaN  
24-Jan-2018 02:00:00, NaN  
24-Jan-2018 03:00:00, NaN  
24-Jan-2018 04:00:00, NaN  
24-Jan-2018 05:00:00, NaN  
24-Jan-2018 06:00:00, NaN  
24-Jan-2018 07:00:00, NaN  
24-Jan-2018 08:00:00, NaN  
24-Jan-2018 09:00:00, NaN  
24-Jan-2018 10:00:00, NaN  
24-Jan-2018 11:00:00, NaN  
24-Jan-2018 12:00:00, NaN  
24-Jan-2018 13:00:00, NaN  
24-Jan-2018 14:00:00, NaN  
24-Jan-2018 15:00:00, NaN  
24-Jan-2018 16:00:00, NaN  
24-Jan-2018 17:00:00, NaN  
24-Jan-2018 18:00:00, NaN  
24-Jan-2018 19:00:00, NaN  
24-Jan-2018 20:00:00, NaN  
24-Jan-2018 21:00:00, NaN  
24-Jan-2018 22:00:00, NaN  
24-Jan-2018 23:00:00, NaN  
25-Jan-2018, NaN  
25-Jan-2018 01:00:00, NaN  
25-Jan-2018 02:00:00, NaN  
25-Jan-2018 03:00:00, NaN  
25-Jan-2018 04:00:00, NaN  
25-Jan-2018 05:00:00, NaN  
25-Jan-2018 06:00:00, NaN  
25-Jan-2018 07:00:00, NaN  
25-Jan-2018 08:00:00, NaN  
25-Jan-2018 09:00:00, NaN  
25-Jan-2018 10:00:00, NaN  
25-Jan-2018 11:00:00, NaN  
25-Jan-2018 12:00:00, NaN  
25-Jan-2018 13:00:00, NaN  
25-Jan-2018 14:00:00, NaN  
25-Jan-2018 15:00:00, NaN  
25-Jan-2018 16:00:00, NaN  
25-Jan-2018 17:00:00, NaN  
25-Jan-2018 18:00:00, NaN  
25-Jan-2018 19:00:00, NaN  
25-Jan-2018 20:00:00, NaN  
25-Jan-2018 21:00:00, NaN  
25-Jan-2018 22:00:00, NaN  
25-Jan-2018 23:00:00, NaN  
26-Jan-2018, NaN  
26-Jan-2018 01:00:00, NaN  
26-Jan-2018 02:00:00, NaN  
26-Jan-2018 03:00:00, NaN  
26-Jan-2018 04:00:00, NaN  
26-Jan-2018 05:00:00, NaN  
26-Jan-2018 06:00:00, NaN  
26-Jan-2018 07:00:00, NaN  
26-Jan-2018 08:00:00, NaN  
26-Jan-2018 09:00:00, NaN  
26-Jan-2018 10:00:00, NaN  
26-Jan-2018 11:00:00, NaN  
26-Jan-2018 12:00:00, NaN  
26-Jan-2018 13:00:00, NaN  
26-Jan-2018 14:00:00, NaN

26-Jan-2018 15:00:00, NaN  
26-Jan-2018 16:00:00, NaN  
26-Jan-2018 17:00:00, NaN  
26-Jan-2018 18:00:00, NaN  
26-Jan-2018 19:00:00, NaN  
26-Jan-2018 20:00:00, NaN  
26-Jan-2018 21:00:00, NaN  
26-Jan-2018 22:00:00, NaN  
26-Jan-2018 23:00:00, NaN  
27-Jan-2018, NaN  
27-Jan-2018 01:00:00, NaN  
27-Jan-2018 02:00:00, NaN  
27-Jan-2018 03:00:00, NaN  
27-Jan-2018 04:00:00, NaN  
27-Jan-2018 05:00:00, NaN  
27-Jan-2018 06:00:00, NaN  
27-Jan-2018 07:00:00, NaN  
27-Jan-2018 08:00:00, NaN  
27-Jan-2018 09:00:00, NaN  
27-Jan-2018 10:00:00, NaN  
27-Jan-2018 11:00:00, NaN  
27-Jan-2018 12:00:00, NaN  
27-Jan-2018 13:00:00, NaN  
27-Jan-2018 14:00:00, NaN  
27-Jan-2018 15:00:00, NaN  
27-Jan-2018 16:00:00, NaN  
27-Jan-2018 17:00:00, NaN  
27-Jan-2018 18:00:00, NaN  
27-Jan-2018 19:00:00, NaN  
27-Jan-2018 20:00:00, NaN  
27-Jan-2018 21:00:00, NaN  
27-Jan-2018 22:00:00, NaN  
27-Jan-2018 23:00:00, NaN  
28-Jan-2018, NaN  
28-Jan-2018 01:00:00, NaN  
28-Jan-2018 02:00:00, NaN  
28-Jan-2018 03:00:00, NaN  
28-Jan-2018 04:00:00, NaN  
28-Jan-2018 05:00:00, NaN  
28-Jan-2018 06:00:00, NaN  
28-Jan-2018 07:00:00, NaN  
28-Jan-2018 08:00:00, NaN  
28-Jan-2018 09:00:00, NaN  
28-Jan-2018 10:00:00, NaN  
28-Jan-2018 11:00:00, NaN  
28-Jan-2018 12:00:00, NaN  
28-Jan-2018 13:00:00, NaN  
28-Jan-2018 14:00:00, NaN  
28-Jan-2018 15:00:00, NaN  
28-Jan-2018 16:00:00, NaN  
28-Jan-2018 17:00:00, NaN  
28-Jan-2018 18:00:00, NaN  
28-Jan-2018 19:00:00, NaN  
28-Jan-2018 20:00:00, NaN  
28-Jan-2018 21:00:00, NaN  
28-Jan-2018 22:00:00, NaN  
28-Jan-2018 23:00:00, NaN  
29-Jan-2018, NaN  
29-Jan-2018 01:00:00, NaN  
29-Jan-2018 02:00:00, NaN  
29-Jan-2018 03:00:00, NaN  
29-Jan-2018 04:00:00, NaN  
29-Jan-2018 05:00:00, NaN  
29-Jan-2018 06:00:00, NaN

29-Jan-2018 07:00:00, NaN  
29-Jan-2018 08:00:00, NaN  
29-Jan-2018 09:00:00, NaN  
29-Jan-2018 10:00:00, NaN  
29-Jan-2018 11:00:00, NaN  
29-Jan-2018 12:00:00, NaN  
29-Jan-2018 13:00:00, NaN  
29-Jan-2018 14:00:00, NaN  
29-Jan-2018 15:00:00, NaN  
29-Jan-2018 16:00:00, NaN  
29-Jan-2018 17:00:00, NaN  
29-Jan-2018 18:00:00, NaN  
29-Jan-2018 19:00:00, NaN  
29-Jan-2018 20:00:00, NaN  
29-Jan-2018 21:00:00, NaN  
29-Jan-2018 22:00:00, NaN  
29-Jan-2018 23:00:00, NaN  
30-Jan-2018, NaN  
30-Jan-2018 01:00:00, NaN  
30-Jan-2018 02:00:00, NaN  
30-Jan-2018 03:00:00, NaN  
30-Jan-2018 04:00:00, NaN  
30-Jan-2018 05:00:00, NaN  
30-Jan-2018 06:00:00, NaN  
30-Jan-2018 07:00:00, NaN  
30-Jan-2018 08:00:00, NaN  
30-Jan-2018 09:00:00, NaN  
30-Jan-2018 10:00:00, NaN  
30-Jan-2018 11:00:00, NaN  
30-Jan-2018 12:00:00, NaN  
30-Jan-2018 13:00:00, NaN  
30-Jan-2018 14:00:00, NaN  
30-Jan-2018 15:00:00, NaN  
30-Jan-2018 16:00:00, NaN  
30-Jan-2018 17:00:00, NaN  
30-Jan-2018 18:00:00, NaN  
30-Jan-2018 19:00:00, NaN  
30-Jan-2018 20:00:00, NaN  
30-Jan-2018 21:00:00, NaN  
30-Jan-2018 22:00:00, NaN  
30-Jan-2018 23:00:00, NaN  
31-Jan-2018, NaN  
31-Jan-2018 01:00:00, NaN  
31-Jan-2018 02:00:00, NaN  
31-Jan-2018 03:00:00, NaN  
31-Jan-2018 04:00:00, NaN  
31-Jan-2018 05:00:00, NaN  
31-Jan-2018 06:00:00, NaN  
31-Jan-2018 07:00:00, NaN  
31-Jan-2018 08:00:00, NaN  
31-Jan-2018 09:00:00, NaN  
31-Jan-2018 10:00:00, NaN  
31-Jan-2018 11:00:00, NaN  
31-Jan-2018 12:00:00, NaN  
31-Jan-2018 13:00:00, NaN  
31-Jan-2018 14:00:00, NaN  
31-Jan-2018 15:00:00, NaN  
31-Jan-2018 16:00:00, NaN  
31-Jan-2018 17:00:00, NaN  
31-Jan-2018 18:00:00, NaN  
31-Jan-2018 19:00:00, NaN  
31-Jan-2018 20:00:00, NaN  
31-Jan-2018 21:00:00, NaN  
31-Jan-2018 22:00:00, NaN

31-Jan-2018 23:00:00, NaN  
01-Feb-2018, NaN  
01-Feb-2018 01:00:00, NaN  
01-Feb-2018 02:00:00, NaN  
01-Feb-2018 03:00:00, NaN  
01-Feb-2018 04:00:00, NaN  
01-Feb-2018 05:00:00, NaN  
01-Feb-2018 06:00:00, NaN  
01-Feb-2018 07:00:00, NaN  
01-Feb-2018 08:00:00, NaN  
01-Feb-2018 09:00:00, NaN  
01-Feb-2018 10:00:00, NaN  
01-Feb-2018 11:00:00, NaN  
01-Feb-2018 12:00:00, NaN  
01-Feb-2018 13:00:00, NaN  
01-Feb-2018 14:00:00, NaN  
01-Feb-2018 15:00:00, NaN  
01-Feb-2018 16:00:00, NaN  
01-Feb-2018 17:00:00, NaN  
01-Feb-2018 18:00:00, NaN  
01-Feb-2018 19:00:00, NaN  
01-Feb-2018 20:00:00, NaN  
01-Feb-2018 21:00:00, NaN  
01-Feb-2018 22:00:00, NaN  
01-Feb-2018 23:00:00, NaN  
02-Feb-2018, NaN  
02-Feb-2018 01:00:00, NaN  
02-Feb-2018 02:00:00, NaN  
02-Feb-2018 03:00:00, NaN  
02-Feb-2018 04:00:00, NaN  
02-Feb-2018 05:00:00, NaN  
02-Feb-2018 06:00:00, NaN  
02-Feb-2018 07:00:00, NaN  
02-Feb-2018 08:00:00, NaN  
02-Feb-2018 09:00:00, NaN  
02-Feb-2018 10:00:00, NaN  
02-Feb-2018 11:00:00, NaN  
02-Feb-2018 12:00:00, NaN  
02-Feb-2018 13:00:00, NaN  
02-Feb-2018 14:00:00, NaN  
02-Feb-2018 15:00:00, NaN  
02-Feb-2018 16:00:00, NaN  
02-Feb-2018 17:00:00, NaN  
02-Feb-2018 18:00:00, NaN  
02-Feb-2018 19:00:00, NaN  
02-Feb-2018 20:00:00, NaN  
02-Feb-2018 21:00:00, NaN  
02-Feb-2018 22:00:00, NaN  
02-Feb-2018 23:00:00, NaN  
03-Feb-2018, NaN  
03-Feb-2018 01:00:00, NaN  
03-Feb-2018 02:00:00, NaN  
03-Feb-2018 03:00:00, NaN  
03-Feb-2018 04:00:00, NaN  
03-Feb-2018 05:00:00, NaN  
03-Feb-2018 06:00:00, NaN  
03-Feb-2018 07:00:00, NaN  
03-Feb-2018 08:00:00, NaN  
03-Feb-2018 09:00:00, NaN  
03-Feb-2018 10:00:00, NaN  
03-Feb-2018 11:00:00, NaN  
03-Feb-2018 12:00:00, NaN  
03-Feb-2018 13:00:00, NaN  
03-Feb-2018 14:00:00, NaN

03-Feb-2018 15:00:00, NaN  
03-Feb-2018 16:00:00, NaN  
03-Feb-2018 17:00:00, NaN  
03-Feb-2018 18:00:00, NaN  
03-Feb-2018 19:00:00, NaN  
03-Feb-2018 20:00:00, NaN  
03-Feb-2018 21:00:00, NaN  
03-Feb-2018 22:00:00, NaN  
03-Feb-2018 23:00:00, NaN  
04-Feb-2018, NaN  
04-Feb-2018 01:00:00, NaN  
04-Feb-2018 02:00:00, NaN  
04-Feb-2018 03:00:00, NaN  
04-Feb-2018 04:00:00, NaN  
04-Feb-2018 05:00:00, NaN  
04-Feb-2018 06:00:00, NaN  
04-Feb-2018 07:00:00, NaN  
04-Feb-2018 08:00:00, NaN  
04-Feb-2018 09:00:00, NaN  
04-Feb-2018 10:00:00, NaN  
04-Feb-2018 11:00:00, NaN  
04-Feb-2018 12:00:00, NaN  
04-Feb-2018 13:00:00, NaN  
04-Feb-2018 14:00:00, NaN  
04-Feb-2018 15:00:00, NaN  
04-Feb-2018 16:00:00, NaN  
04-Feb-2018 17:00:00, NaN  
04-Feb-2018 18:00:00, NaN  
04-Feb-2018 19:00:00, NaN  
04-Feb-2018 20:00:00, NaN  
04-Feb-2018 21:00:00, NaN  
04-Feb-2018 22:00:00, NaN  
04-Feb-2018 23:00:00, NaN  
05-Feb-2018, NaN  
05-Feb-2018 01:00:00, NaN  
05-Feb-2018 02:00:00, NaN  
05-Feb-2018 03:00:00, NaN  
05-Feb-2018 04:00:00, NaN  
05-Feb-2018 05:00:00, NaN  
05-Feb-2018 06:00:00, NaN  
05-Feb-2018 07:00:00, NaN  
05-Feb-2018 08:00:00, NaN  
05-Feb-2018 09:00:00, NaN  
05-Feb-2018 10:00:00, NaN  
05-Feb-2018 11:00:00, NaN  
05-Feb-2018 12:00:00, NaN  
05-Feb-2018 13:00:00, NaN  
05-Feb-2018 14:00:00, NaN  
05-Feb-2018 15:00:00, NaN  
05-Feb-2018 16:00:00, NaN  
05-Feb-2018 17:00:00, NaN  
05-Feb-2018 18:00:00, NaN  
05-Feb-2018 19:00:00, NaN  
05-Feb-2018 20:00:00, NaN  
05-Feb-2018 21:00:00, NaN  
05-Feb-2018 22:00:00, NaN  
05-Feb-2018 23:00:00, NaN  
06-Feb-2018, NaN  
06-Feb-2018 01:00:00, NaN  
06-Feb-2018 02:00:00, NaN  
06-Feb-2018 03:00:00, NaN  
06-Feb-2018 04:00:00, NaN  
06-Feb-2018 05:00:00, NaN  
06-Feb-2018 06:00:00, NaN



06-Feb-2018 07:00:00, NaN  
06-Feb-2018 08:00:00, NaN  
06-Feb-2018 09:00:00, NaN  
06-Feb-2018 10:00:00, NaN  
06-Feb-2018 11:00:00, NaN  
06-Feb-2018 12:00:00, NaN  
06-Feb-2018 13:00:00, NaN  
06-Feb-2018 14:00:00, NaN  
06-Feb-2018 15:00:00, NaN  
06-Feb-2018 16:00:00, NaN  
06-Feb-2018 17:00:00, NaN  
06-Feb-2018 18:00:00, NaN  
06-Feb-2018 19:00:00, NaN  
06-Feb-2018 20:00:00, NaN  
06-Feb-2018 21:00:00, NaN  
06-Feb-2018 22:00:00, NaN  
06-Feb-2018 23:00:00, NaN  
07-Feb-2018, NaN  
07-Feb-2018 01:00:00, NaN  
07-Feb-2018 02:00:00, NaN  
07-Feb-2018 03:00:00, NaN  
07-Feb-2018 04:00:00, NaN  
07-Feb-2018 05:00:00, NaN  
07-Feb-2018 06:00:00, NaN  
07-Feb-2018 07:00:00, NaN  
07-Feb-2018 08:00:00, NaN  
07-Feb-2018 09:00:00, NaN  
07-Feb-2018 10:00:00, NaN  
07-Feb-2018 11:00:00, NaN  
07-Feb-2018 12:00:00, NaN  
07-Feb-2018 13:00:00, NaN  
07-Feb-2018 14:00:00, NaN  
07-Feb-2018 15:00:00, NaN  
07-Feb-2018 16:00:00, NaN  
07-Feb-2018 17:00:00, NaN  
07-Feb-2018 18:00:00, NaN  
07-Feb-2018 19:00:00, NaN  
07-Feb-2018 20:00:00, NaN  
07-Feb-2018 21:00:00, NaN  
07-Feb-2018 22:00:00, NaN  
07-Feb-2018 23:00:00, NaN  
08-Feb-2018, NaN  
08-Feb-2018 01:00:00, NaN  
08-Feb-2018 02:00:00, NaN  
08-Feb-2018 03:00:00, NaN  
08-Feb-2018 04:00:00, NaN  
08-Feb-2018 05:00:00, NaN  
08-Feb-2018 06:00:00, NaN  
08-Feb-2018 07:00:00, NaN  
08-Feb-2018 08:00:00, NaN  
08-Feb-2018 09:00:00, NaN  
08-Feb-2018 10:00:00, NaN  
08-Feb-2018 11:00:00, NaN  
08-Feb-2018 12:00:00, NaN  
08-Feb-2018 13:00:00, NaN  
08-Feb-2018 14:00:00, NaN  
08-Feb-2018 15:00:00, NaN  
08-Feb-2018 16:00:00, NaN  
08-Feb-2018 17:00:00, NaN  
08-Feb-2018 18:00:00, NaN  
08-Feb-2018 19:00:00, NaN  
08-Feb-2018 20:00:00, NaN  
08-Feb-2018 21:00:00, NaN  
08-Feb-2018 22:00:00, NaN

08-Feb-2018 23:00:00, NaN  
09-Feb-2018, NaN  
09-Feb-2018 01:00:00, NaN  
09-Feb-2018 02:00:00, NaN  
09-Feb-2018 03:00:00, NaN  
09-Feb-2018 04:00:00, NaN  
09-Feb-2018 05:00:00, NaN  
09-Feb-2018 06:00:00, NaN  
09-Feb-2018 07:00:00, NaN  
09-Feb-2018 08:00:00, NaN  
09-Feb-2018 09:00:00, NaN  
09-Feb-2018 10:00:00, NaN  
09-Feb-2018 11:00:00, NaN  
09-Feb-2018 12:00:00, NaN  
09-Feb-2018 13:00:00, NaN  
09-Feb-2018 14:00:00, NaN  
09-Feb-2018 15:00:00, NaN  
09-Feb-2018 16:00:00, NaN  
09-Feb-2018 17:00:00, NaN  
09-Feb-2018 18:00:00, NaN  
09-Feb-2018 19:00:00, NaN  
09-Feb-2018 20:00:00, NaN  
09-Feb-2018 21:00:00, NaN  
09-Feb-2018 22:00:00, NaN  
09-Feb-2018 23:00:00, NaN  
10-Feb-2018, NaN  
10-Feb-2018 01:00:00, NaN  
10-Feb-2018 02:00:00, NaN  
10-Feb-2018 03:00:00, NaN  
10-Feb-2018 04:00:00, NaN  
10-Feb-2018 05:00:00, NaN  
10-Feb-2018 06:00:00, NaN  
10-Feb-2018 07:00:00, NaN  
10-Feb-2018 08:00:00, NaN  
10-Feb-2018 09:00:00, NaN  
10-Feb-2018 10:00:00, NaN  
10-Feb-2018 11:00:00, NaN  
10-Feb-2018 12:00:00, NaN  
10-Feb-2018 13:00:00, NaN  
10-Feb-2018 14:00:00, NaN  
10-Feb-2018 15:00:00, NaN  
10-Feb-2018 16:00:00, NaN  
10-Feb-2018 17:00:00, NaN  
10-Feb-2018 18:00:00, NaN  
10-Feb-2018 19:00:00, NaN  
10-Feb-2018 20:00:00, NaN  
10-Feb-2018 21:00:00, NaN  
10-Feb-2018 22:00:00, NaN  
10-Feb-2018 23:00:00, NaN  
11-Feb-2018, NaN  
11-Feb-2018 01:00:00, NaN  
11-Feb-2018 02:00:00, NaN  
11-Feb-2018 03:00:00, NaN  
11-Feb-2018 04:00:00, NaN  
11-Feb-2018 05:00:00, NaN  
11-Feb-2018 06:00:00, NaN  
11-Feb-2018 07:00:00, NaN  
11-Feb-2018 08:00:00, NaN  
11-Feb-2018 09:00:00, NaN  
11-Feb-2018 10:00:00, NaN  
11-Feb-2018 11:00:00, NaN  
11-Feb-2018 12:00:00, NaN  
11-Feb-2018 13:00:00, NaN  
11-Feb-2018 14:00:00, NaN

11-Feb-2018 15:00:00, NaN  
11-Feb-2018 16:00:00, NaN  
11-Feb-2018 17:00:00, NaN  
11-Feb-2018 18:00:00, NaN  
11-Feb-2018 19:00:00, NaN  
11-Feb-2018 20:00:00, NaN  
11-Feb-2018 21:00:00, NaN  
11-Feb-2018 22:00:00, NaN  
11-Feb-2018 23:00:00, NaN  
12-Feb-2018, NaN  
12-Feb-2018 01:00:00, NaN  
12-Feb-2018 02:00:00, NaN  
12-Feb-2018 03:00:00, NaN  
12-Feb-2018 04:00:00, NaN  
12-Feb-2018 05:00:00, NaN  
12-Feb-2018 06:00:00, NaN  
12-Feb-2018 07:00:00, NaN  
12-Feb-2018 08:00:00, NaN  
12-Feb-2018 09:00:00, NaN  
12-Feb-2018 10:00:00, NaN  
12-Feb-2018 11:00:00, NaN  
12-Feb-2018 12:00:00, NaN  
12-Feb-2018 13:00:00, NaN  
12-Feb-2018 14:00:00, NaN  
12-Feb-2018 15:00:00, NaN  
12-Feb-2018 16:00:00, NaN  
12-Feb-2018 17:00:00, NaN  
12-Feb-2018 18:00:00, NaN  
12-Feb-2018 19:00:00, NaN  
12-Feb-2018 20:00:00, NaN  
12-Feb-2018 21:00:00, NaN  
12-Feb-2018 22:00:00, NaN  
12-Feb-2018 23:00:00, NaN  
13-Feb-2018, NaN  
13-Feb-2018 01:00:00, NaN  
13-Feb-2018 02:00:00, NaN  
13-Feb-2018 03:00:00, NaN  
13-Feb-2018 04:00:00, NaN  
13-Feb-2018 05:00:00, NaN  
13-Feb-2018 06:00:00, NaN  
13-Feb-2018 07:00:00, NaN  
13-Feb-2018 08:00:00, NaN  
13-Feb-2018 09:00:00, NaN  
13-Feb-2018 10:00:00, NaN  
13-Feb-2018 11:00:00, NaN  
13-Feb-2018 12:00:00, NaN  
13-Feb-2018 13:00:00, NaN  
13-Feb-2018 14:00:00, NaN  
13-Feb-2018 15:00:00, NaN  
13-Feb-2018 16:00:00, NaN  
13-Feb-2018 17:00:00, NaN  
13-Feb-2018 18:00:00, NaN  
13-Feb-2018 19:00:00, NaN  
13-Feb-2018 20:00:00, NaN  
13-Feb-2018 21:00:00, NaN  
13-Feb-2018 22:00:00, NaN  
13-Feb-2018 23:00:00, NaN  
14-Feb-2018, NaN  
14-Feb-2018 01:00:00, NaN  
14-Feb-2018 02:00:00, NaN  
14-Feb-2018 03:00:00, NaN  
14-Feb-2018 04:00:00, NaN  
14-Feb-2018 05:00:00, NaN  
14-Feb-2018 06:00:00, NaN

14-Feb-2018 07:00:00, NaN  
14-Feb-2018 08:00:00, NaN  
14-Feb-2018 09:00:00, NaN  
14-Feb-2018 10:00:00, NaN  
14-Feb-2018 11:00:00, NaN  
14-Feb-2018 12:00:00, NaN  
14-Feb-2018 13:00:00, NaN  
14-Feb-2018 14:00:00, NaN  
14-Feb-2018 15:00:00, NaN  
14-Feb-2018 16:00:00, NaN  
14-Feb-2018 17:00:00, NaN  
14-Feb-2018 18:00:00, NaN  
14-Feb-2018 19:00:00, NaN  
14-Feb-2018 20:00:00, NaN  
14-Feb-2018 21:00:00, NaN  
14-Feb-2018 22:00:00, NaN  
14-Feb-2018 23:00:00, NaN  
15-Feb-2018, NaN  
15-Feb-2018 01:00:00, NaN  
15-Feb-2018 02:00:00, NaN  
15-Feb-2018 03:00:00, NaN  
15-Feb-2018 04:00:00, NaN  
15-Feb-2018 05:00:00, NaN  
15-Feb-2018 06:00:00, NaN  
15-Feb-2018 07:00:00, NaN  
15-Feb-2018 08:00:00, NaN  
15-Feb-2018 09:00:00, NaN  
15-Feb-2018 10:00:00, NaN  
15-Feb-2018 11:00:00, NaN  
15-Feb-2018 12:00:00, NaN  
15-Feb-2018 13:00:00, NaN  
15-Feb-2018 14:00:00, NaN  
15-Feb-2018 15:00:00, NaN  
15-Feb-2018 16:00:00, NaN  
15-Feb-2018 17:00:00, NaN  
15-Feb-2018 18:00:00, NaN  
15-Feb-2018 19:00:00, NaN  
15-Feb-2018 20:00:00, NaN  
15-Feb-2018 21:00:00, NaN  
15-Feb-2018 22:00:00, NaN  
15-Feb-2018 23:00:00, NaN  
16-Feb-2018, NaN  
16-Feb-2018 01:00:00, NaN  
16-Feb-2018 02:00:00, NaN  
16-Feb-2018 03:00:00, NaN  
16-Feb-2018 04:00:00, NaN  
16-Feb-2018 05:00:00, NaN  
16-Feb-2018 06:00:00, NaN  
16-Feb-2018 07:00:00, NaN  
16-Feb-2018 08:00:00, NaN  
16-Feb-2018 09:00:00, NaN  
16-Feb-2018 10:00:00, NaN  
16-Feb-2018 11:00:00, NaN  
16-Feb-2018 12:00:00, NaN  
16-Feb-2018 13:00:00, NaN  
16-Feb-2018 14:00:00, NaN  
16-Feb-2018 15:00:00, NaN  
16-Feb-2018 16:00:00, NaN  
16-Feb-2018 17:00:00, NaN  
16-Feb-2018 18:00:00, NaN  
16-Feb-2018 19:00:00, NaN  
16-Feb-2018 20:00:00, NaN  
16-Feb-2018 21:00:00, NaN  
16-Feb-2018 22:00:00, NaN

16-Feb-2018 23:00:00, NaN  
17-Feb-2018, NaN  
17-Feb-2018 01:00:00, NaN  
17-Feb-2018 02:00:00, NaN  
17-Feb-2018 03:00:00, NaN  
17-Feb-2018 04:00:00, NaN  
17-Feb-2018 05:00:00, NaN  
17-Feb-2018 06:00:00, NaN  
17-Feb-2018 07:00:00, NaN  
17-Feb-2018 08:00:00, NaN  
17-Feb-2018 09:00:00, NaN  
17-Feb-2018 10:00:00, NaN  
17-Feb-2018 11:00:00, NaN  
17-Feb-2018 12:00:00, NaN  
17-Feb-2018 13:00:00, NaN  
17-Feb-2018 14:00:00, NaN  
17-Feb-2018 15:00:00, NaN  
17-Feb-2018 16:00:00, NaN  
17-Feb-2018 17:00:00, NaN  
17-Feb-2018 18:00:00, NaN  
17-Feb-2018 19:00:00, NaN  
17-Feb-2018 20:00:00, NaN  
17-Feb-2018 21:00:00, NaN  
17-Feb-2018 22:00:00, NaN  
17-Feb-2018 23:00:00, NaN  
18-Feb-2018, NaN  
18-Feb-2018 01:00:00, NaN  
18-Feb-2018 02:00:00, NaN  
18-Feb-2018 03:00:00, NaN  
18-Feb-2018 04:00:00, NaN  
18-Feb-2018 05:00:00, NaN  
18-Feb-2018 06:00:00, NaN  
18-Feb-2018 07:00:00, NaN  
18-Feb-2018 08:00:00, NaN  
18-Feb-2018 09:00:00, NaN  
18-Feb-2018 10:00:00, NaN  
18-Feb-2018 11:00:00, NaN  
18-Feb-2018 12:00:00, NaN  
18-Feb-2018 13:00:00, NaN  
18-Feb-2018 14:00:00, NaN  
18-Feb-2018 15:00:00, NaN  
18-Feb-2018 16:00:00, NaN  
18-Feb-2018 17:00:00, NaN  
18-Feb-2018 18:00:00, NaN  
18-Feb-2018 19:00:00, NaN  
18-Feb-2018 20:00:00, NaN  
18-Feb-2018 21:00:00, NaN  
18-Feb-2018 22:00:00, NaN  
18-Feb-2018 23:00:00, NaN  
19-Feb-2018, NaN  
19-Feb-2018 01:00:00, NaN  
19-Feb-2018 02:00:00, NaN  
19-Feb-2018 03:00:00, NaN  
19-Feb-2018 04:00:00, NaN  
19-Feb-2018 05:00:00, NaN  
19-Feb-2018 06:00:00, NaN  
19-Feb-2018 07:00:00, NaN  
19-Feb-2018 08:00:00, NaN  
19-Feb-2018 09:00:00, NaN  
19-Feb-2018 10:00:00, NaN  
19-Feb-2018 11:00:00, NaN  
19-Feb-2018 12:00:00, NaN  
19-Feb-2018 13:00:00, NaN  
19-Feb-2018 14:00:00, NaN

19-Feb-2018 15:00:00, NaN  
19-Feb-2018 16:00:00, NaN  
19-Feb-2018 17:00:00, NaN  
19-Feb-2018 18:00:00, NaN  
19-Feb-2018 19:00:00, NaN  
19-Feb-2018 20:00:00, NaN  
19-Feb-2018 21:00:00, NaN  
19-Feb-2018 22:00:00, NaN  
19-Feb-2018 23:00:00, NaN  
20-Feb-2018, NaN  
20-Feb-2018 01:00:00, NaN  
20-Feb-2018 02:00:00, NaN  
20-Feb-2018 03:00:00, NaN  
20-Feb-2018 04:00:00, NaN  
20-Feb-2018 05:00:00, NaN  
20-Feb-2018 06:00:00, NaN  
20-Feb-2018 07:00:00, NaN  
20-Feb-2018 08:00:00, NaN  
20-Feb-2018 09:00:00, NaN  
20-Feb-2018 10:00:00, NaN  
20-Feb-2018 11:00:00, NaN  
20-Feb-2018 12:00:00, NaN  
20-Feb-2018 13:00:00, NaN  
20-Feb-2018 14:00:00, NaN  
20-Feb-2018 15:00:00, NaN  
20-Feb-2018 16:00:00, NaN  
20-Feb-2018 17:00:00, NaN  
20-Feb-2018 18:00:00, NaN  
20-Feb-2018 19:00:00, NaN  
20-Feb-2018 20:00:00, NaN  
20-Feb-2018 21:00:00, NaN  
20-Feb-2018 22:00:00, NaN  
20-Feb-2018 23:00:00, NaN  
21-Feb-2018, NaN  
21-Feb-2018 01:00:00, NaN  
21-Feb-2018 02:00:00, NaN  
21-Feb-2018 03:00:00, NaN  
21-Feb-2018 04:00:00, NaN  
21-Feb-2018 05:00:00, NaN  
21-Feb-2018 06:00:00, NaN  
21-Feb-2018 07:00:00, NaN  
21-Feb-2018 08:00:00, NaN  
21-Feb-2018 09:00:00, NaN  
21-Feb-2018 10:00:00, NaN  
21-Feb-2018 11:00:00, NaN  
21-Feb-2018 12:00:00, NaN  
21-Feb-2018 13:00:00, NaN  
21-Feb-2018 14:00:00, NaN  
21-Feb-2018 15:00:00, NaN  
21-Feb-2018 16:00:00, NaN  
21-Feb-2018 17:00:00, NaN  
21-Feb-2018 18:00:00, NaN  
21-Feb-2018 19:00:00, NaN  
21-Feb-2018 20:00:00, NaN  
21-Feb-2018 21:00:00, NaN  
21-Feb-2018 22:00:00, NaN  
21-Feb-2018 23:00:00, NaN  
22-Feb-2018, NaN  
22-Feb-2018 01:00:00, NaN  
22-Feb-2018 02:00:00, NaN  
22-Feb-2018 03:00:00, NaN  
22-Feb-2018 04:00:00, NaN  
22-Feb-2018 05:00:00, NaN  
22-Feb-2018 06:00:00, NaN

|              |           |     |
|--------------|-----------|-----|
| 22-Feb-2018  | 07:00:00, | NaN |
| 22-Feb-2018  | 08:00:00, | NaN |
| 22-Feb-2018  | 09:00:00, | NaN |
| 22-Feb-2018  | 10:00:00, | NaN |
| 22-Feb-2018  | 11:00:00, | NaN |
| 22-Feb-2018  | 12:00:00, | NaN |
| 22-Feb-2018  | 13:00:00, | NaN |
| 22-Feb-2018  | 14:00:00, | NaN |
| 22-Feb-2018  | 15:00:00, | NaN |
| 22-Feb-2018  | 16:00:00, | NaN |
| 22-Feb-2018  | 17:00:00, | NaN |
| 22-Feb-2018  | 18:00:00, | NaN |
| 22-Feb-2018  | 19:00:00, | NaN |
| 22-Feb-2018  | 20:00:00, | NaN |
| 22-Feb-2018  | 21:00:00, | NaN |
| 22-Feb-2018  | 22:00:00, | NaN |
| 22-Feb-2018  | 23:00:00, | NaN |
| 23-Feb-2018, |           | NaN |
| 23-Feb-2018  | 01:00:00, | NaN |
| 23-Feb-2018  | 02:00:00, | NaN |
| 23-Feb-2018  | 03:00:00, | NaN |
| 23-Feb-2018  | 04:00:00, | NaN |
| 23-Feb-2018  | 05:00:00, | NaN |
| 23-Feb-2018  | 06:00:00, | NaN |
| 23-Feb-2018  | 07:00:00, | NaN |
| 23-Feb-2018  | 08:00:00, | NaN |
| 23-Feb-2018  | 09:00:00, | NaN |
| 23-Feb-2018  | 10:00:00, | NaN |
| 23-Feb-2018  | 11:00:00, | NaN |
| 23-Feb-2018  | 12:00:00, | NaN |
| 23-Feb-2018  | 13:00:00, | NaN |
| 23-Feb-2018  | 14:00:00, | NaN |
| 23-Feb-2018  | 15:00:00, | NaN |
| 23-Feb-2018  | 16:00:00, | NaN |
| 23-Feb-2018  | 17:00:00, | NaN |
| 23-Feb-2018  | 18:00:00, | NaN |
| 23-Feb-2018  | 19:00:00, | NaN |
| 23-Feb-2018  | 20:00:00, | NaN |
| 23-Feb-2018  | 21:00:00, | NaN |
| 23-Feb-2018  | 22:00:00, | NaN |
| 23-Feb-2018  | 23:00:00, | NaN |
| 24-Feb-2018, |           | NaN |
| 24-Feb-2018  | 01:00:00, | NaN |
| 24-Feb-2018  | 02:00:00, | NaN |
| 24-Feb-2018  | 03:00:00, | NaN |
| 24-Feb-2018  | 04:00:00, | NaN |
| 24-Feb-2018  | 05:00:00, | NaN |
| 24-Feb-2018  | 06:00:00, | NaN |
| 24-Feb-2018  | 07:00:00, | NaN |
| 24-Feb-2018  | 08:00:00, | NaN |
| 24-Feb-2018  | 09:00:00, | NaN |
| 24-Feb-2018  | 10:00:00, | NaN |
| 24-Feb-2018  | 11:00:00, | NaN |
| 24-Feb-2018  | 12:00:00, | NaN |
| 24-Feb-2018  | 13:00:00, | NaN |
| 24-Feb-2018  | 14:00:00, | NaN |
| 24-Feb-2018  | 15:00:00, | NaN |
| 24-Feb-2018  | 16:00:00, | NaN |
| 24-Feb-2018  | 17:00:00, | NaN |
| 24-Feb-2018  | 18:00:00, | NaN |
| 24-Feb-2018  | 19:00:00, | NaN |
| 24-Feb-2018  | 20:00:00, | NaN |
| 24-Feb-2018  | 21:00:00, | NaN |
| 24-Feb-2018  | 22:00:00, | NaN |

24-Feb-2018 23:00:00, NaN  
25-Feb-2018, NaN  
25-Feb-2018 01:00:00, NaN  
25-Feb-2018 02:00:00, NaN  
25-Feb-2018 03:00:00, NaN  
25-Feb-2018 04:00:00, NaN  
25-Feb-2018 05:00:00, NaN  
25-Feb-2018 06:00:00, NaN  
25-Feb-2018 07:00:00, NaN  
25-Feb-2018 08:00:00, NaN  
25-Feb-2018 09:00:00, NaN  
25-Feb-2018 10:00:00, NaN  
25-Feb-2018 11:00:00, NaN  
25-Feb-2018 12:00:00, NaN  
25-Feb-2018 13:00:00, NaN  
25-Feb-2018 14:00:00, NaN  
25-Feb-2018 15:00:00, NaN  
25-Feb-2018 16:00:00, NaN  
25-Feb-2018 17:00:00, NaN  
25-Feb-2018 18:00:00, NaN  
25-Feb-2018 19:00:00, NaN  
25-Feb-2018 20:00:00, NaN  
25-Feb-2018 21:00:00, NaN  
25-Feb-2018 22:00:00, NaN  
25-Feb-2018 23:00:00, NaN  
26-Feb-2018, NaN  
26-Feb-2018 01:00:00, NaN  
26-Feb-2018 02:00:00, NaN  
26-Feb-2018 03:00:00, NaN  
26-Feb-2018 04:00:00, NaN  
26-Feb-2018 05:00:00, NaN  
26-Feb-2018 06:00:00, NaN  
26-Feb-2018 07:00:00, NaN  
26-Feb-2018 08:00:00, NaN  
26-Feb-2018 09:00:00, NaN  
26-Feb-2018 10:00:00, NaN  
26-Feb-2018 11:00:00, NaN  
26-Feb-2018 12:00:00, NaN  
26-Feb-2018 13:00:00, NaN  
26-Feb-2018 14:00:00, NaN  
26-Feb-2018 15:00:00, NaN  
26-Feb-2018 16:00:00, NaN  
26-Feb-2018 17:00:00, NaN  
26-Feb-2018 18:00:00, NaN  
26-Feb-2018 19:00:00, NaN  
26-Feb-2018 20:00:00, NaN  
26-Feb-2018 21:00:00, NaN  
26-Feb-2018 22:00:00, NaN  
26-Feb-2018 23:00:00, NaN  
27-Feb-2018, NaN  
27-Feb-2018 01:00:00, NaN  
27-Feb-2018 02:00:00, NaN  
27-Feb-2018 03:00:00, NaN  
27-Feb-2018 04:00:00, NaN  
27-Feb-2018 05:00:00, NaN  
27-Feb-2018 06:00:00, NaN  
27-Feb-2018 07:00:00, NaN  
27-Feb-2018 08:00:00, NaN  
27-Feb-2018 09:00:00, NaN  
27-Feb-2018 10:00:00, NaN  
27-Feb-2018 11:00:00, NaN  
27-Feb-2018 12:00:00, NaN  
27-Feb-2018 13:00:00, NaN  
27-Feb-2018 14:00:00, NaN



27-Feb-2018 15:00:00, NaN  
27-Feb-2018 16:00:00, NaN  
27-Feb-2018 17:00:00, NaN  
27-Feb-2018 18:00:00, NaN  
27-Feb-2018 19:00:00, NaN  
27-Feb-2018 20:00:00, NaN  
27-Feb-2018 21:00:00, NaN  
27-Feb-2018 22:00:00, NaN  
27-Feb-2018 23:00:00, NaN  
28-Feb-2018, NaN  
28-Feb-2018 01:00:00, NaN  
28-Feb-2018 02:00:00, NaN  
28-Feb-2018 03:00:00, NaN  
28-Feb-2018 04:00:00, NaN  
28-Feb-2018 05:00:00, NaN  
28-Feb-2018 06:00:00, NaN  
28-Feb-2018 07:00:00, NaN  
28-Feb-2018 08:00:00, NaN  
28-Feb-2018 09:00:00, NaN  
28-Feb-2018 10:00:00, NaN  
28-Feb-2018 11:00:00, NaN  
28-Feb-2018 12:00:00, NaN  
28-Feb-2018 13:00:00, NaN  
28-Feb-2018 14:00:00, NaN  
28-Feb-2018 15:00:00, NaN  
28-Feb-2018 16:00:00, NaN  
28-Feb-2018 17:00:00, NaN  
28-Feb-2018 18:00:00, NaN  
28-Feb-2018 19:00:00, NaN  
28-Feb-2018 20:00:00, NaN  
28-Feb-2018 21:00:00, NaN  
28-Feb-2018 22:00:00, NaN  
28-Feb-2018 23:00:00, NaN  
01-Mar-2018, NaN  
01-Mar-2018 01:00:00, NaN  
01-Mar-2018 02:00:00, NaN  
01-Mar-2018 03:00:00, NaN  
01-Mar-2018 04:00:00, NaN  
01-Mar-2018 05:00:00, NaN  
01-Mar-2018 06:00:00, NaN  
01-Mar-2018 07:00:00, NaN  
01-Mar-2018 08:00:00, NaN  
01-Mar-2018 09:00:00, NaN  
01-Mar-2018 10:00:00, NaN  
01-Mar-2018 11:00:00, NaN  
01-Mar-2018 12:00:00, NaN  
01-Mar-2018 13:00:00, NaN  
01-Mar-2018 14:00:00, NaN  
01-Mar-2018 15:00:00, NaN  
01-Mar-2018 16:00:00, NaN  
01-Mar-2018 17:00:00, NaN  
01-Mar-2018 18:00:00, NaN  
01-Mar-2018 19:00:00, NaN  
01-Mar-2018 20:00:00, NaN  
01-Mar-2018 21:00:00, NaN  
01-Mar-2018 22:00:00, NaN  
01-Mar-2018 23:00:00, NaN  
02-Mar-2018, NaN  
02-Mar-2018 01:00:00, NaN  
02-Mar-2018 02:00:00, NaN  
02-Mar-2018 03:00:00, NaN  
02-Mar-2018 04:00:00, NaN  
02-Mar-2018 05:00:00, NaN  
02-Mar-2018 06:00:00, NaN

02-Mar-2018 07:00:00, NaN  
02-Mar-2018 08:00:00, NaN  
02-Mar-2018 09:00:00, NaN  
02-Mar-2018 10:00:00, NaN  
02-Mar-2018 11:00:00, NaN  
02-Mar-2018 12:00:00, NaN  
02-Mar-2018 13:00:00, NaN  
02-Mar-2018 14:00:00, NaN  
02-Mar-2018 15:00:00, NaN  
02-Mar-2018 16:00:00, NaN  
02-Mar-2018 17:00:00, NaN  
02-Mar-2018 18:00:00, NaN  
02-Mar-2018 19:00:00, NaN  
02-Mar-2018 20:00:00, NaN  
02-Mar-2018 21:00:00, NaN  
02-Mar-2018 22:00:00, NaN  
02-Mar-2018 23:00:00, NaN  
03-Mar-2018, NaN  
03-Mar-2018 01:00:00, NaN  
03-Mar-2018 02:00:00, NaN  
03-Mar-2018 03:00:00, NaN  
03-Mar-2018 04:00:00, NaN  
03-Mar-2018 05:00:00, NaN  
03-Mar-2018 06:00:00, NaN  
03-Mar-2018 07:00:00, NaN  
03-Mar-2018 08:00:00, NaN  
03-Mar-2018 09:00:00, NaN  
03-Mar-2018 10:00:00, NaN  
03-Mar-2018 11:00:00, NaN  
03-Mar-2018 12:00:00, NaN  
03-Mar-2018 13:00:00, NaN  
03-Mar-2018 14:00:00, NaN  
03-Mar-2018 15:00:00, NaN  
03-Mar-2018 16:00:00, NaN  
03-Mar-2018 17:00:00, NaN  
03-Mar-2018 18:00:00, NaN  
03-Mar-2018 19:00:00, NaN  
03-Mar-2018 20:00:00, NaN  
03-Mar-2018 21:00:00, NaN  
03-Mar-2018 22:00:00, NaN  
03-Mar-2018 23:00:00, NaN  
04-Mar-2018, NaN  
04-Mar-2018 01:00:00, NaN  
04-Mar-2018 02:00:00, NaN  
04-Mar-2018 03:00:00, NaN  
04-Mar-2018 04:00:00, NaN  
04-Mar-2018 05:00:00, NaN  
04-Mar-2018 06:00:00, NaN  
04-Mar-2018 07:00:00, NaN  
04-Mar-2018 08:00:00, NaN  
04-Mar-2018 09:00:00, NaN  
04-Mar-2018 10:00:00, NaN  
04-Mar-2018 11:00:00, NaN  
04-Mar-2018 12:00:00, NaN  
04-Mar-2018 13:00:00, NaN  
04-Mar-2018 14:00:00, NaN  
04-Mar-2018 15:00:00, NaN  
04-Mar-2018 16:00:00, NaN  
04-Mar-2018 17:00:00, NaN  
04-Mar-2018 18:00:00, NaN  
04-Mar-2018 19:00:00, NaN  
04-Mar-2018 20:00:00, NaN  
04-Mar-2018 21:00:00, NaN  
04-Mar-2018 22:00:00, NaN

04-Mar-2018 23:00:00, NaN  
05-Mar-2018, NaN  
05-Mar-2018 01:00:00, NaN  
05-Mar-2018 02:00:00, NaN  
05-Mar-2018 03:00:00, NaN  
05-Mar-2018 04:00:00, NaN  
05-Mar-2018 05:00:00, NaN  
05-Mar-2018 06:00:00, NaN  
05-Mar-2018 07:00:00, NaN  
05-Mar-2018 08:00:00, NaN  
05-Mar-2018 09:00:00, NaN  
05-Mar-2018 10:00:00, NaN  
05-Mar-2018 11:00:00, NaN  
05-Mar-2018 12:00:00, NaN  
05-Mar-2018 13:00:00, NaN  
05-Mar-2018 14:00:00, NaN  
05-Mar-2018 15:00:00, NaN  
05-Mar-2018 16:00:00, NaN  
05-Mar-2018 17:00:00, NaN  
05-Mar-2018 18:00:00, NaN  
05-Mar-2018 19:00:00, NaN  
05-Mar-2018 20:00:00, NaN  
05-Mar-2018 21:00:00, NaN  
05-Mar-2018 22:00:00, NaN  
05-Mar-2018 23:00:00, NaN  
06-Mar-2018, NaN  
06-Mar-2018 01:00:00, NaN  
06-Mar-2018 02:00:00, NaN  
06-Mar-2018 03:00:00, NaN  
06-Mar-2018 04:00:00, NaN  
06-Mar-2018 05:00:00, NaN  
06-Mar-2018 06:00:00, NaN  
06-Mar-2018 07:00:00, NaN  
06-Mar-2018 08:00:00, NaN  
06-Mar-2018 09:00:00, NaN  
06-Mar-2018 10:00:00, NaN  
06-Mar-2018 11:00:00, NaN  
06-Mar-2018 12:00:00, NaN  
06-Mar-2018 13:00:00, NaN  
06-Mar-2018 14:00:00, NaN  
06-Mar-2018 15:00:00, NaN  
06-Mar-2018 16:00:00, NaN  
06-Mar-2018 17:00:00, NaN  
06-Mar-2018 18:00:00, NaN  
06-Mar-2018 19:00:00, NaN  
06-Mar-2018 20:00:00, NaN  
06-Mar-2018 21:00:00, NaN  
06-Mar-2018 22:00:00, NaN  
06-Mar-2018 23:00:00, NaN  
07-Mar-2018, NaN  
07-Mar-2018 01:00:00, NaN  
07-Mar-2018 02:00:00, NaN  
07-Mar-2018 03:00:00, NaN  
07-Mar-2018 04:00:00, NaN  
07-Mar-2018 05:00:00, NaN  
07-Mar-2018 06:00:00, NaN  
07-Mar-2018 07:00:00, NaN  
07-Mar-2018 08:00:00, NaN  
07-Mar-2018 09:00:00, NaN  
07-Mar-2018 10:00:00, NaN  
07-Mar-2018 11:00:00, NaN  
07-Mar-2018 12:00:00, NaN  
07-Mar-2018 13:00:00, NaN  
07-Mar-2018 14:00:00, NaN

07-Mar-2018 15:00:00, NaN  
07-Mar-2018 16:00:00, NaN  
07-Mar-2018 17:00:00, NaN  
07-Mar-2018 18:00:00, NaN  
07-Mar-2018 19:00:00, NaN  
07-Mar-2018 20:00:00, NaN  
07-Mar-2018 21:00:00, NaN  
07-Mar-2018 22:00:00, NaN  
07-Mar-2018 23:00:00, NaN  
08-Mar-2018, NaN  
08-Mar-2018 01:00:00, NaN  
08-Mar-2018 02:00:00, NaN  
08-Mar-2018 03:00:00, NaN  
08-Mar-2018 04:00:00, NaN  
08-Mar-2018 05:00:00, NaN  
08-Mar-2018 06:00:00, NaN  
08-Mar-2018 07:00:00, NaN  
08-Mar-2018 08:00:00, NaN  
08-Mar-2018 09:00:00, NaN  
08-Mar-2018 10:00:00, NaN  
08-Mar-2018 11:00:00, NaN  
08-Mar-2018 12:00:00, NaN  
08-Mar-2018 13:00:00, NaN  
08-Mar-2018 14:00:00, NaN  
08-Mar-2018 15:00:00, NaN  
08-Mar-2018 16:00:00, NaN  
08-Mar-2018 17:00:00, NaN  
08-Mar-2018 18:00:00, NaN  
08-Mar-2018 19:00:00, NaN  
08-Mar-2018 20:00:00, NaN  
08-Mar-2018 21:00:00, NaN  
08-Mar-2018 22:00:00, NaN  
08-Mar-2018 23:00:00, NaN  
09-Mar-2018, NaN  
09-Mar-2018 01:00:00, NaN  
09-Mar-2018 02:00:00, NaN  
09-Mar-2018 03:00:00, NaN  
09-Mar-2018 04:00:00, NaN  
09-Mar-2018 05:00:00, NaN  
09-Mar-2018 06:00:00, NaN  
09-Mar-2018 07:00:00, NaN  
09-Mar-2018 08:00:00, NaN  
09-Mar-2018 09:00:00, NaN  
09-Mar-2018 10:00:00, NaN  
09-Mar-2018 11:00:00, NaN  
09-Mar-2018 12:00:00, NaN  
09-Mar-2018 13:00:00, NaN  
09-Mar-2018 14:00:00, NaN  
09-Mar-2018 15:00:00, NaN  
09-Mar-2018 16:00:00, NaN  
09-Mar-2018 17:00:00, NaN  
09-Mar-2018 18:00:00, NaN  
09-Mar-2018 19:00:00, NaN  
09-Mar-2018 20:00:00, NaN  
09-Mar-2018 21:00:00, NaN  
09-Mar-2018 22:00:00, NaN  
09-Mar-2018 23:00:00, NaN  
10-Mar-2018, NaN  
10-Mar-2018 01:00:00, NaN  
10-Mar-2018 02:00:00, NaN  
10-Mar-2018 03:00:00, NaN  
10-Mar-2018 04:00:00, NaN  
10-Mar-2018 05:00:00, NaN  
10-Mar-2018 06:00:00, NaN

10-Mar-2018 07:00:00, NaN  
10-Mar-2018 08:00:00, NaN  
10-Mar-2018 09:00:00, NaN  
10-Mar-2018 10:00:00, NaN  
10-Mar-2018 11:00:00, NaN  
10-Mar-2018 12:00:00, NaN  
10-Mar-2018 13:00:00, NaN  
10-Mar-2018 14:00:00, NaN  
10-Mar-2018 15:00:00, NaN  
10-Mar-2018 16:00:00, NaN  
10-Mar-2018 17:00:00, NaN  
10-Mar-2018 18:00:00, NaN  
10-Mar-2018 19:00:00, NaN  
10-Mar-2018 20:00:00, NaN  
10-Mar-2018 21:00:00, NaN  
10-Mar-2018 22:00:00, NaN  
10-Mar-2018 23:00:00, NaN  
11-Mar-2018, NaN  
11-Mar-2018 01:00:00, NaN  
11-Mar-2018 02:00:00, NaN  
11-Mar-2018 03:00:00, NaN  
11-Mar-2018 04:00:00, NaN  
11-Mar-2018 05:00:00, NaN  
11-Mar-2018 06:00:00, NaN  
11-Mar-2018 07:00:00, NaN  
11-Mar-2018 08:00:00, NaN  
11-Mar-2018 09:00:00, NaN  
11-Mar-2018 10:00:00, NaN  
11-Mar-2018 11:00:00, NaN  
11-Mar-2018 12:00:00, NaN  
11-Mar-2018 13:00:00, NaN  
11-Mar-2018 14:00:00, NaN  
11-Mar-2018 15:00:00, NaN  
11-Mar-2018 16:00:00, NaN  
11-Mar-2018 17:00:00, NaN  
11-Mar-2018 18:00:00, NaN  
11-Mar-2018 19:00:00, NaN  
11-Mar-2018 20:00:00, NaN  
11-Mar-2018 21:00:00, NaN  
11-Mar-2018 22:00:00, NaN  
11-Mar-2018 23:00:00, NaN  
12-Mar-2018, NaN  
12-Mar-2018 01:00:00, NaN  
12-Mar-2018 02:00:00, NaN  
12-Mar-2018 03:00:00, NaN  
12-Mar-2018 04:00:00, NaN  
12-Mar-2018 05:00:00, NaN  
12-Mar-2018 06:00:00, NaN  
12-Mar-2018 07:00:00, NaN  
12-Mar-2018 08:00:00, NaN  
12-Mar-2018 09:00:00, NaN  
12-Mar-2018 10:00:00, NaN  
12-Mar-2018 11:00:00, NaN  
12-Mar-2018 12:00:00, NaN  
12-Mar-2018 13:00:00, NaN  
12-Mar-2018 14:00:00, NaN  
12-Mar-2018 15:00:00, NaN  
12-Mar-2018 16:00:00, NaN  
12-Mar-2018 17:00:00, NaN  
12-Mar-2018 18:00:00, NaN  
12-Mar-2018 19:00:00, NaN  
12-Mar-2018 20:00:00, NaN  
12-Mar-2018 21:00:00, NaN  
12-Mar-2018 22:00:00, NaN

12-Mar-2018 23:00:00, NaN  
13-Mar-2018, NaN  
13-Mar-2018 01:00:00, NaN  
13-Mar-2018 02:00:00, NaN  
13-Mar-2018 03:00:00, NaN  
13-Mar-2018 04:00:00, NaN  
13-Mar-2018 05:00:00, NaN  
13-Mar-2018 06:00:00, NaN  
13-Mar-2018 07:00:00, NaN  
13-Mar-2018 08:00:00, NaN  
13-Mar-2018 09:00:00, NaN  
13-Mar-2018 10:00:00, NaN  
13-Mar-2018 11:00:00, NaN  
13-Mar-2018 12:00:00, NaN  
13-Mar-2018 13:00:00, NaN  
13-Mar-2018 14:00:00, NaN  
13-Mar-2018 15:00:00, NaN  
13-Mar-2018 16:00:00, NaN  
13-Mar-2018 17:00:00, NaN  
13-Mar-2018 18:00:00, NaN  
13-Mar-2018 19:00:00, NaN  
13-Mar-2018 20:00:00, NaN  
13-Mar-2018 21:00:00, NaN  
13-Mar-2018 22:00:00, NaN  
13-Mar-2018 23:00:00, NaN  
14-Mar-2018, NaN  
14-Mar-2018 01:00:00, NaN  
14-Mar-2018 02:00:00, NaN  
14-Mar-2018 03:00:00, NaN  
14-Mar-2018 04:00:00, NaN  
14-Mar-2018 05:00:00, NaN  
14-Mar-2018 06:00:00, NaN  
14-Mar-2018 07:00:00, NaN  
14-Mar-2018 08:00:00, NaN  
14-Mar-2018 09:00:00, NaN  
14-Mar-2018 10:00:00, NaN  
14-Mar-2018 11:00:00, NaN  
14-Mar-2018 12:00:00, NaN  
14-Mar-2018 13:00:00, NaN  
14-Mar-2018 14:00:00, NaN  
14-Mar-2018 15:00:00, NaN  
14-Mar-2018 16:00:00, NaN  
14-Mar-2018 17:00:00, NaN  
14-Mar-2018 18:00:00, NaN  
14-Mar-2018 19:00:00, NaN  
14-Mar-2018 20:00:00, NaN  
14-Mar-2018 21:00:00, NaN  
14-Mar-2018 22:00:00, NaN  
14-Mar-2018 23:00:00, NaN  
15-Mar-2018, NaN  
15-Mar-2018 01:00:00, NaN  
15-Mar-2018 02:00:00, NaN  
15-Mar-2018 03:00:00, NaN  
15-Mar-2018 04:00:00, NaN  
15-Mar-2018 05:00:00, NaN  
15-Mar-2018 06:00:00, NaN  
15-Mar-2018 07:00:00, NaN  
15-Mar-2018 08:00:00, NaN  
15-Mar-2018 09:00:00, NaN  
15-Mar-2018 10:00:00, NaN  
15-Mar-2018 11:00:00, NaN  
15-Mar-2018 12:00:00, NaN  
15-Mar-2018 13:00:00, NaN  
15-Mar-2018 14:00:00, NaN

15-Mar-2018 15:00:00, NaN  
15-Mar-2018 16:00:00, NaN  
15-Mar-2018 17:00:00, NaN  
15-Mar-2018 18:00:00, NaN  
15-Mar-2018 19:00:00, NaN  
15-Mar-2018 20:00:00, NaN  
15-Mar-2018 21:00:00, NaN  
15-Mar-2018 22:00:00, NaN  
15-Mar-2018 23:00:00, NaN  
16-Mar-2018, NaN  
16-Mar-2018 01:00:00, NaN  
16-Mar-2018 02:00:00, NaN  
16-Mar-2018 03:00:00, NaN  
16-Mar-2018 04:00:00, NaN  
16-Mar-2018 05:00:00, NaN  
16-Mar-2018 06:00:00, NaN  
16-Mar-2018 07:00:00, NaN  
16-Mar-2018 08:00:00, NaN  
16-Mar-2018 09:00:00, NaN  
16-Mar-2018 10:00:00, NaN  
16-Mar-2018 11:00:00, NaN  
16-Mar-2018 12:00:00, NaN  
16-Mar-2018 13:00:00, NaN  
16-Mar-2018 14:00:00, NaN  
16-Mar-2018 15:00:00, NaN  
16-Mar-2018 16:00:00, NaN  
16-Mar-2018 17:00:00, NaN  
16-Mar-2018 18:00:00, NaN  
16-Mar-2018 19:00:00, NaN  
16-Mar-2018 20:00:00, NaN  
16-Mar-2018 21:00:00, NaN  
16-Mar-2018 22:00:00, NaN  
16-Mar-2018 23:00:00, NaN  
17-Mar-2018, NaN  
17-Mar-2018 01:00:00, NaN  
17-Mar-2018 02:00:00, NaN  
17-Mar-2018 03:00:00, NaN  
17-Mar-2018 04:00:00, NaN  
17-Mar-2018 05:00:00, NaN  
17-Mar-2018 06:00:00, NaN  
17-Mar-2018 07:00:00, NaN  
17-Mar-2018 08:00:00, NaN  
17-Mar-2018 09:00:00, NaN  
17-Mar-2018 10:00:00, NaN  
17-Mar-2018 11:00:00, NaN  
17-Mar-2018 12:00:00, NaN  
17-Mar-2018 13:00:00, NaN  
17-Mar-2018 14:00:00, NaN  
17-Mar-2018 15:00:00, NaN  
17-Mar-2018 16:00:00, NaN  
17-Mar-2018 17:00:00, NaN  
17-Mar-2018 18:00:00, NaN  
17-Mar-2018 19:00:00, NaN  
17-Mar-2018 20:00:00, NaN  
17-Mar-2018 21:00:00, NaN  
17-Mar-2018 22:00:00, NaN  
17-Mar-2018 23:00:00, NaN  
18-Mar-2018, NaN  
18-Mar-2018 01:00:00, NaN  
18-Mar-2018 02:00:00, NaN  
18-Mar-2018 03:00:00, NaN  
18-Mar-2018 04:00:00, NaN  
18-Mar-2018 05:00:00, NaN  
18-Mar-2018 06:00:00, NaN

18-Mar-2018 07:00:00, NaN  
18-Mar-2018 08:00:00, NaN  
18-Mar-2018 09:00:00, NaN  
18-Mar-2018 10:00:00, NaN  
18-Mar-2018 11:00:00, NaN  
18-Mar-2018 12:00:00, NaN  
18-Mar-2018 13:00:00, NaN  
18-Mar-2018 14:00:00, NaN  
18-Mar-2018 15:00:00, NaN  
18-Mar-2018 16:00:00, NaN  
18-Mar-2018 17:00:00, NaN  
18-Mar-2018 18:00:00, NaN  
18-Mar-2018 19:00:00, NaN  
18-Mar-2018 20:00:00, NaN  
18-Mar-2018 21:00:00, NaN  
18-Mar-2018 22:00:00, NaN  
18-Mar-2018 23:00:00, NaN  
19-Mar-2018, NaN  
19-Mar-2018 01:00:00, NaN  
19-Mar-2018 02:00:00, NaN  
19-Mar-2018 03:00:00, NaN  
19-Mar-2018 04:00:00, NaN  
19-Mar-2018 05:00:00, NaN  
19-Mar-2018 06:00:00, NaN  
19-Mar-2018 07:00:00, NaN  
19-Mar-2018 08:00:00, NaN  
19-Mar-2018 09:00:00, NaN  
19-Mar-2018 10:00:00, NaN  
19-Mar-2018 11:00:00, NaN  
19-Mar-2018 12:00:00, NaN  
19-Mar-2018 13:00:00, NaN  
19-Mar-2018 14:00:00, NaN  
19-Mar-2018 15:00:00, NaN  
19-Mar-2018 16:00:00, NaN  
19-Mar-2018 17:00:00, NaN  
19-Mar-2018 18:00:00, NaN  
19-Mar-2018 19:00:00, NaN  
19-Mar-2018 20:00:00, NaN  
19-Mar-2018 21:00:00, NaN  
19-Mar-2018 22:00:00, NaN  
19-Mar-2018 23:00:00, NaN  
20-Mar-2018, NaN  
20-Mar-2018 01:00:00, NaN  
20-Mar-2018 02:00:00, NaN  
20-Mar-2018 03:00:00, NaN  
20-Mar-2018 04:00:00, NaN  
20-Mar-2018 05:00:00, NaN  
20-Mar-2018 06:00:00, NaN  
20-Mar-2018 07:00:00, NaN  
20-Mar-2018 08:00:00, NaN  
20-Mar-2018 09:00:00, NaN  
20-Mar-2018 10:00:00, NaN  
20-Mar-2018 11:00:00, NaN  
20-Mar-2018 12:00:00, NaN  
20-Mar-2018 13:00:00, NaN  
20-Mar-2018 14:00:00, NaN  
20-Mar-2018 15:00:00, NaN  
20-Mar-2018 16:00:00, NaN  
20-Mar-2018 17:00:00, NaN  
20-Mar-2018 18:00:00, NaN  
20-Mar-2018 19:00:00, NaN  
20-Mar-2018 20:00:00, NaN  
20-Mar-2018 21:00:00, NaN  
20-Mar-2018 22:00:00, NaN



20-Mar-2018 23:00:00, NaN  
21-Mar-2018, NaN  
21-Mar-2018 01:00:00, NaN  
21-Mar-2018 02:00:00, NaN  
21-Mar-2018 03:00:00, NaN  
21-Mar-2018 04:00:00, NaN  
21-Mar-2018 05:00:00, NaN  
21-Mar-2018 06:00:00, NaN  
21-Mar-2018 07:00:00, NaN  
21-Mar-2018 08:00:00, NaN  
21-Mar-2018 09:00:00, NaN  
21-Mar-2018 10:00:00, NaN  
21-Mar-2018 11:00:00, NaN  
21-Mar-2018 12:00:00, NaN  
21-Mar-2018 13:00:00, NaN  
21-Mar-2018 14:00:00, NaN  
21-Mar-2018 15:00:00, NaN  
21-Mar-2018 16:00:00, NaN  
21-Mar-2018 17:00:00, NaN  
21-Mar-2018 18:00:00, NaN  
21-Mar-2018 19:00:00, NaN  
21-Mar-2018 20:00:00, NaN  
21-Mar-2018 21:00:00, NaN  
21-Mar-2018 22:00:00, NaN  
21-Mar-2018 23:00:00, NaN  
22-Mar-2018, NaN  
22-Mar-2018 01:00:00, NaN  
22-Mar-2018 02:00:00, NaN  
22-Mar-2018 03:00:00, NaN  
22-Mar-2018 04:00:00, NaN  
22-Mar-2018 05:00:00, NaN  
22-Mar-2018 06:00:00, NaN  
22-Mar-2018 07:00:00, NaN  
22-Mar-2018 08:00:00, NaN  
22-Mar-2018 09:00:00, NaN  
22-Mar-2018 10:00:00, NaN  
22-Mar-2018 11:00:00, NaN  
22-Mar-2018 12:00:00, NaN  
22-Mar-2018 13:00:00, NaN  
22-Mar-2018 14:00:00, NaN  
22-Mar-2018 15:00:00, NaN  
22-Mar-2018 16:00:00, NaN  
22-Mar-2018 17:00:00, NaN  
22-Mar-2018 18:00:00, NaN  
22-Mar-2018 19:00:00, NaN  
22-Mar-2018 20:00:00, NaN  
22-Mar-2018 21:00:00, NaN  
22-Mar-2018 22:00:00, NaN  
22-Mar-2018 23:00:00, NaN  
23-Mar-2018, NaN  
23-Mar-2018 01:00:00, NaN  
23-Mar-2018 02:00:00, NaN  
23-Mar-2018 03:00:00, NaN  
23-Mar-2018 04:00:00, NaN  
23-Mar-2018 05:00:00, NaN  
23-Mar-2018 06:00:00, NaN  
23-Mar-2018 07:00:00, NaN  
23-Mar-2018 08:00:00, NaN  
23-Mar-2018 09:00:00, NaN  
23-Mar-2018 10:00:00, NaN  
23-Mar-2018 11:00:00, NaN  
23-Mar-2018 12:00:00, NaN  
23-Mar-2018 13:00:00, NaN  
23-Mar-2018 14:00:00, NaN

23-Mar-2018 15:00:00, NaN  
23-Mar-2018 16:00:00, NaN  
23-Mar-2018 17:00:00, NaN  
23-Mar-2018 18:00:00, NaN  
23-Mar-2018 19:00:00, NaN  
23-Mar-2018 20:00:00, NaN  
23-Mar-2018 21:00:00, NaN  
23-Mar-2018 22:00:00, NaN  
23-Mar-2018 23:00:00, NaN  
24-Mar-2018, NaN  
24-Mar-2018 01:00:00, NaN  
24-Mar-2018 02:00:00, NaN  
24-Mar-2018 03:00:00, NaN  
24-Mar-2018 04:00:00, NaN  
24-Mar-2018 05:00:00, NaN  
24-Mar-2018 06:00:00, NaN  
24-Mar-2018 07:00:00, NaN  
24-Mar-2018 08:00:00, NaN  
24-Mar-2018 09:00:00, NaN  
24-Mar-2018 10:00:00, NaN  
24-Mar-2018 11:00:00, NaN  
24-Mar-2018 12:00:00, NaN  
24-Mar-2018 13:00:00, NaN  
24-Mar-2018 14:00:00, NaN  
24-Mar-2018 15:00:00, NaN  
24-Mar-2018 16:00:00, NaN  
24-Mar-2018 17:00:00, NaN  
24-Mar-2018 18:00:00, NaN  
24-Mar-2018 19:00:00, NaN  
24-Mar-2018 20:00:00, NaN  
24-Mar-2018 21:00:00, NaN  
24-Mar-2018 22:00:00, NaN  
24-Mar-2018 23:00:00, NaN  
25-Mar-2018, NaN  
25-Mar-2018 01:00:00, NaN  
25-Mar-2018 02:00:00, NaN  
25-Mar-2018 03:00:00, NaN  
25-Mar-2018 04:00:00, NaN  
25-Mar-2018 05:00:00, NaN  
25-Mar-2018 06:00:00, NaN  
25-Mar-2018 07:00:00, NaN  
25-Mar-2018 08:00:00, NaN  
25-Mar-2018 09:00:00, NaN  
25-Mar-2018 10:00:00, NaN  
25-Mar-2018 11:00:00, NaN  
25-Mar-2018 12:00:00, NaN  
25-Mar-2018 13:00:00, NaN  
25-Mar-2018 14:00:00, NaN  
25-Mar-2018 15:00:00, NaN  
25-Mar-2018 16:00:00, NaN  
25-Mar-2018 17:00:00, NaN  
25-Mar-2018 18:00:00, NaN  
25-Mar-2018 19:00:00, NaN  
25-Mar-2018 20:00:00, NaN  
25-Mar-2018 21:00:00, NaN  
25-Mar-2018 22:00:00, NaN  
25-Mar-2018 23:00:00, NaN  
26-Mar-2018, NaN  
26-Mar-2018 01:00:00, NaN  
26-Mar-2018 02:00:00, NaN  
26-Mar-2018 03:00:00, NaN  
26-Mar-2018 04:00:00, NaN  
26-Mar-2018 05:00:00, NaN  
26-Mar-2018 06:00:00, NaN

26-Mar-2018 07:00:00, NaN  
26-Mar-2018 08:00:00, NaN  
26-Mar-2018 09:00:00, NaN  
26-Mar-2018 10:00:00, NaN  
26-Mar-2018 11:00:00, NaN  
26-Mar-2018 12:00:00, NaN  
26-Mar-2018 13:00:00, NaN  
26-Mar-2018 14:00:00, NaN  
26-Mar-2018 15:00:00, NaN  
26-Mar-2018 16:00:00, NaN  
26-Mar-2018 17:00:00, NaN  
26-Mar-2018 18:00:00, NaN  
26-Mar-2018 19:00:00, NaN  
26-Mar-2018 20:00:00, NaN  
26-Mar-2018 21:00:00, NaN  
26-Mar-2018 22:00:00, NaN  
26-Mar-2018 23:00:00, NaN  
27-Mar-2018, NaN  
27-Mar-2018 01:00:00, NaN  
27-Mar-2018 02:00:00, NaN  
27-Mar-2018 03:00:00, NaN  
27-Mar-2018 04:00:00, NaN  
27-Mar-2018 05:00:00, NaN  
27-Mar-2018 06:00:00, NaN  
27-Mar-2018 07:00:00, NaN  
27-Mar-2018 08:00:00, NaN  
27-Mar-2018 09:00:00, NaN  
27-Mar-2018 10:00:00, NaN  
27-Mar-2018 11:00:00, NaN  
27-Mar-2018 12:00:00, NaN  
27-Mar-2018 13:00:00, NaN  
27-Mar-2018 14:00:00, NaN  
27-Mar-2018 15:00:00, NaN  
27-Mar-2018 16:00:00, NaN  
27-Mar-2018 17:00:00, NaN  
27-Mar-2018 18:00:00, NaN  
27-Mar-2018 19:00:00, NaN  
27-Mar-2018 20:00:00, NaN  
27-Mar-2018 21:00:00, NaN  
27-Mar-2018 22:00:00, NaN  
27-Mar-2018 23:00:00, NaN  
28-Mar-2018, NaN  
28-Mar-2018 01:00:00, NaN  
28-Mar-2018 02:00:00, NaN  
28-Mar-2018 03:00:00, NaN  
28-Mar-2018 04:00:00, NaN  
28-Mar-2018 05:00:00, NaN  
28-Mar-2018 06:00:00, NaN  
28-Mar-2018 07:00:00, NaN  
28-Mar-2018 08:00:00, NaN  
28-Mar-2018 09:00:00, NaN  
28-Mar-2018 10:00:00, NaN  
28-Mar-2018 11:00:00, NaN  
28-Mar-2018 12:00:00, NaN  
28-Mar-2018 13:00:00, NaN  
28-Mar-2018 14:00:00, NaN  
28-Mar-2018 15:00:00, NaN  
28-Mar-2018 16:00:00, NaN  
28-Mar-2018 17:00:00, NaN  
28-Mar-2018 18:00:00, NaN  
28-Mar-2018 19:00:00, NaN  
28-Mar-2018 20:00:00, NaN  
28-Mar-2018 21:00:00, NaN  
28-Mar-2018 22:00:00, NaN

28-Mar-2018 23:00:00, NaN  
29-Mar-2018, NaN  
29-Mar-2018 01:00:00, NaN  
29-Mar-2018 02:00:00, NaN  
29-Mar-2018 03:00:00, NaN  
29-Mar-2018 04:00:00, NaN  
29-Mar-2018 05:00:00, NaN  
29-Mar-2018 06:00:00, NaN  
29-Mar-2018 07:00:00, NaN  
29-Mar-2018 08:00:00, NaN  
29-Mar-2018 09:00:00, NaN  
29-Mar-2018 10:00:00, NaN  
29-Mar-2018 11:00:00, NaN  
29-Mar-2018 12:00:00, NaN  
29-Mar-2018 13:00:00, NaN  
29-Mar-2018 14:00:00, NaN  
29-Mar-2018 15:00:00, NaN  
29-Mar-2018 16:00:00, NaN  
29-Mar-2018 17:00:00, NaN  
29-Mar-2018 18:00:00, NaN  
29-Mar-2018 19:00:00, NaN  
29-Mar-2018 20:00:00, NaN  
29-Mar-2018 21:00:00, NaN  
29-Mar-2018 22:00:00, NaN  
29-Mar-2018 23:00:00, NaN  
30-Mar-2018, NaN  
30-Mar-2018 01:00:00, NaN  
30-Mar-2018 02:00:00, NaN  
30-Mar-2018 03:00:00, NaN  
30-Mar-2018 04:00:00, NaN  
30-Mar-2018 05:00:00, NaN  
30-Mar-2018 06:00:00, NaN  
30-Mar-2018 07:00:00, NaN  
30-Mar-2018 08:00:00, NaN  
30-Mar-2018 09:00:00, NaN  
30-Mar-2018 10:00:00, NaN  
30-Mar-2018 11:00:00, NaN  
30-Mar-2018 12:00:00, NaN  
30-Mar-2018 13:00:00, NaN  
30-Mar-2018 14:00:00, NaN  
30-Mar-2018 15:00:00, NaN  
30-Mar-2018 16:00:00, NaN  
30-Mar-2018 17:00:00, NaN  
30-Mar-2018 18:00:00, NaN  
30-Mar-2018 19:00:00, NaN  
30-Mar-2018 20:00:00, NaN  
30-Mar-2018 21:00:00, NaN  
30-Mar-2018 22:00:00, NaN  
30-Mar-2018 23:00:00, NaN  
31-Mar-2018, NaN  
31-Mar-2018 01:00:00, NaN  
31-Mar-2018 02:00:00, NaN  
31-Mar-2018 03:00:00, NaN  
31-Mar-2018 04:00:00, NaN  
31-Mar-2018 05:00:00, NaN  
31-Mar-2018 06:00:00, NaN  
31-Mar-2018 07:00:00, NaN  
31-Mar-2018 08:00:00, NaN  
31-Mar-2018 09:00:00, NaN  
31-Mar-2018 10:00:00, NaN  
31-Mar-2018 11:00:00, NaN  
31-Mar-2018 12:00:00, NaN  
31-Mar-2018 13:00:00, NaN  
31-Mar-2018 14:00:00, NaN

31-Mar-2018 15:00:00, NaN  
31-Mar-2018 16:00:00, NaN  
31-Mar-2018 17:00:00, NaN  
31-Mar-2018 18:00:00, NaN  
31-Mar-2018 19:00:00, NaN  
31-Mar-2018 20:00:00, NaN  
31-Mar-2018 21:00:00, NaN  
31-Mar-2018 22:00:00, NaN  
31-Mar-2018 23:00:00, NaN  
01-Apr-2018, NaN  
01-Apr-2018 01:00:00, NaN  
01-Apr-2018 02:00:00, NaN  
01-Apr-2018 03:00:00, NaN  
01-Apr-2018 04:00:00, NaN  
01-Apr-2018 05:00:00, NaN  
01-Apr-2018 06:00:00, NaN  
01-Apr-2018 07:00:00, NaN  
01-Apr-2018 08:00:00, NaN  
01-Apr-2018 09:00:00, NaN  
01-Apr-2018 10:00:00, NaN  
01-Apr-2018 11:00:00, NaN  
01-Apr-2018 12:00:00, NaN  
01-Apr-2018 13:00:00, NaN  
01-Apr-2018 14:00:00, NaN  
01-Apr-2018 15:00:00, NaN  
01-Apr-2018 16:00:00, NaN  
01-Apr-2018 17:00:00, NaN  
01-Apr-2018 18:00:00, NaN  
01-Apr-2018 19:00:00, NaN  
01-Apr-2018 20:00:00, NaN  
01-Apr-2018 21:00:00, NaN  
01-Apr-2018 22:00:00, NaN  
01-Apr-2018 23:00:00, NaN  
02-Apr-2018, NaN  
02-Apr-2018 01:00:00, NaN  
02-Apr-2018 02:00:00, NaN  
02-Apr-2018 03:00:00, NaN  
02-Apr-2018 04:00:00, NaN  
02-Apr-2018 05:00:00, NaN  
02-Apr-2018 06:00:00, NaN  
02-Apr-2018 07:00:00, NaN  
02-Apr-2018 08:00:00, NaN  
02-Apr-2018 09:00:00, NaN  
02-Apr-2018 10:00:00, NaN  
02-Apr-2018 11:00:00, NaN  
02-Apr-2018 12:00:00, NaN  
02-Apr-2018 13:00:00, NaN  
02-Apr-2018 14:00:00, NaN  
02-Apr-2018 15:00:00, NaN  
02-Apr-2018 16:00:00, NaN  
02-Apr-2018 17:00:00, NaN  
02-Apr-2018 18:00:00, NaN  
02-Apr-2018 19:00:00, NaN  
02-Apr-2018 20:00:00, NaN  
02-Apr-2018 21:00:00, NaN  
02-Apr-2018 22:00:00, NaN  
02-Apr-2018 23:00:00, NaN  
03-Apr-2018, NaN  
03-Apr-2018 01:00:00, NaN  
03-Apr-2018 02:00:00, NaN  
03-Apr-2018 03:00:00, NaN  
03-Apr-2018 04:00:00, NaN  
03-Apr-2018 05:00:00, NaN  
03-Apr-2018 06:00:00, NaN

03-Apr-2018 07:00:00, NaN  
03-Apr-2018 08:00:00, NaN  
03-Apr-2018 09:00:00, NaN  
03-Apr-2018 10:00:00, NaN  
03-Apr-2018 11:00:00, NaN  
03-Apr-2018 12:00:00, NaN  
03-Apr-2018 13:00:00, NaN  
03-Apr-2018 14:00:00, NaN  
03-Apr-2018 15:00:00, NaN  
03-Apr-2018 16:00:00, NaN  
03-Apr-2018 17:00:00, NaN  
03-Apr-2018 18:00:00, NaN  
03-Apr-2018 19:00:00, NaN  
03-Apr-2018 20:00:00, NaN  
03-Apr-2018 21:00:00, NaN  
03-Apr-2018 22:00:00, NaN  
03-Apr-2018 23:00:00, NaN  
04-Apr-2018, NaN  
04-Apr-2018 01:00:00, NaN  
04-Apr-2018 02:00:00, NaN  
04-Apr-2018 03:00:00, NaN  
04-Apr-2018 04:00:00, NaN  
04-Apr-2018 05:00:00, NaN  
04-Apr-2018 06:00:00, NaN  
04-Apr-2018 07:00:00, NaN  
04-Apr-2018 08:00:00, NaN  
04-Apr-2018 09:00:00, NaN  
04-Apr-2018 10:00:00, NaN  
04-Apr-2018 11:00:00, NaN  
04-Apr-2018 12:00:00, NaN  
04-Apr-2018 13:00:00, NaN  
04-Apr-2018 14:00:00, NaN  
04-Apr-2018 15:00:00, NaN  
04-Apr-2018 16:00:00, NaN  
04-Apr-2018 17:00:00, NaN  
04-Apr-2018 18:00:00, NaN  
04-Apr-2018 19:00:00, NaN  
04-Apr-2018 20:00:00, NaN  
04-Apr-2018 21:00:00, NaN  
04-Apr-2018 22:00:00, NaN  
04-Apr-2018 23:00:00, NaN  
05-Apr-2018, NaN  
05-Apr-2018 01:00:00, NaN  
05-Apr-2018 02:00:00, NaN  
05-Apr-2018 03:00:00, NaN  
05-Apr-2018 04:00:00, NaN  
05-Apr-2018 05:00:00, NaN  
05-Apr-2018 06:00:00, NaN  
05-Apr-2018 07:00:00, NaN  
05-Apr-2018 08:00:00, NaN  
05-Apr-2018 09:00:00, NaN  
05-Apr-2018 10:00:00, NaN  
05-Apr-2018 11:00:00, NaN  
05-Apr-2018 12:00:00, NaN  
05-Apr-2018 13:00:00, NaN  
05-Apr-2018 14:00:00, NaN  
05-Apr-2018 15:00:00, NaN  
05-Apr-2018 16:00:00, NaN  
05-Apr-2018 17:00:00, NaN  
05-Apr-2018 18:00:00, NaN  
05-Apr-2018 19:00:00, NaN  
05-Apr-2018 20:00:00, NaN  
05-Apr-2018 21:00:00, NaN  
05-Apr-2018 22:00:00, NaN

05-Apr-2018 23:00:00, NaN  
06-Apr-2018, NaN  
06-Apr-2018 01:00:00, NaN  
06-Apr-2018 02:00:00, NaN  
06-Apr-2018 03:00:00, NaN  
06-Apr-2018 04:00:00, NaN  
06-Apr-2018 05:00:00, NaN  
06-Apr-2018 06:00:00, NaN  
06-Apr-2018 07:00:00, NaN  
06-Apr-2018 08:00:00, NaN  
06-Apr-2018 09:00:00, NaN  
06-Apr-2018 10:00:00, NaN  
06-Apr-2018 11:00:00, NaN  
06-Apr-2018 12:00:00, NaN  
06-Apr-2018 13:00:00, NaN  
06-Apr-2018 14:00:00, NaN  
06-Apr-2018 15:00:00, NaN  
06-Apr-2018 16:00:00, NaN  
06-Apr-2018 17:00:00, NaN  
06-Apr-2018 18:00:00, NaN  
06-Apr-2018 19:00:00, NaN  
06-Apr-2018 20:00:00, NaN  
06-Apr-2018 21:00:00, NaN  
06-Apr-2018 22:00:00, NaN  
06-Apr-2018 23:00:00, NaN  
07-Apr-2018, NaN  
07-Apr-2018 01:00:00, NaN  
07-Apr-2018 02:00:00, NaN  
07-Apr-2018 03:00:00, NaN  
07-Apr-2018 04:00:00, NaN  
07-Apr-2018 05:00:00, NaN  
07-Apr-2018 06:00:00, NaN  
07-Apr-2018 07:00:00, NaN  
07-Apr-2018 08:00:00, NaN  
07-Apr-2018 09:00:00, NaN  
07-Apr-2018 10:00:00, NaN  
07-Apr-2018 11:00:00, NaN  
07-Apr-2018 12:00:00, NaN  
07-Apr-2018 13:00:00, NaN  
07-Apr-2018 14:00:00, NaN  
07-Apr-2018 15:00:00, NaN  
07-Apr-2018 16:00:00, NaN  
07-Apr-2018 17:00:00, NaN  
07-Apr-2018 18:00:00, NaN  
07-Apr-2018 19:00:00, NaN  
07-Apr-2018 20:00:00, NaN  
07-Apr-2018 21:00:00, NaN  
07-Apr-2018 22:00:00, NaN  
07-Apr-2018 23:00:00, NaN  
08-Apr-2018, NaN  
08-Apr-2018 01:00:00, NaN  
08-Apr-2018 02:00:00, NaN  
08-Apr-2018 03:00:00, NaN  
08-Apr-2018 04:00:00, NaN  
08-Apr-2018 05:00:00, NaN  
08-Apr-2018 06:00:00, NaN  
08-Apr-2018 07:00:00, NaN  
08-Apr-2018 08:00:00, NaN  
08-Apr-2018 09:00:00, NaN  
08-Apr-2018 10:00:00, NaN  
08-Apr-2018 11:00:00, NaN  
08-Apr-2018 12:00:00, NaN  
08-Apr-2018 13:00:00, NaN  
08-Apr-2018 14:00:00, NaN

08-Apr-2018 15:00:00, NaN  
08-Apr-2018 16:00:00, NaN  
08-Apr-2018 17:00:00, NaN  
08-Apr-2018 18:00:00, NaN  
08-Apr-2018 19:00:00, NaN  
08-Apr-2018 20:00:00, NaN  
08-Apr-2018 21:00:00, NaN  
08-Apr-2018 22:00:00, NaN  
08-Apr-2018 23:00:00, NaN  
09-Apr-2018, NaN  
09-Apr-2018 01:00:00, NaN  
09-Apr-2018 02:00:00, NaN  
09-Apr-2018 03:00:00, NaN  
09-Apr-2018 04:00:00, NaN  
09-Apr-2018 05:00:00, NaN  
09-Apr-2018 06:00:00, NaN  
09-Apr-2018 07:00:00, NaN  
09-Apr-2018 08:00:00, NaN  
09-Apr-2018 09:00:00, NaN  
09-Apr-2018 10:00:00, NaN  
09-Apr-2018 11:00:00, NaN  
09-Apr-2018 12:00:00, NaN  
09-Apr-2018 13:00:00, NaN  
09-Apr-2018 14:00:00, NaN  
09-Apr-2018 15:00:00, NaN  
09-Apr-2018 16:00:00, NaN  
09-Apr-2018 17:00:00, NaN  
09-Apr-2018 18:00:00, NaN  
09-Apr-2018 19:00:00, NaN  
09-Apr-2018 20:00:00, NaN  
09-Apr-2018 21:00:00, NaN  
09-Apr-2018 22:00:00, NaN  
09-Apr-2018 23:00:00, NaN  
10-Apr-2018, NaN  
10-Apr-2018 01:00:00, NaN  
10-Apr-2018 02:00:00, NaN  
10-Apr-2018 03:00:00, NaN  
10-Apr-2018 04:00:00, NaN  
10-Apr-2018 05:00:00, NaN  
10-Apr-2018 06:00:00, NaN  
10-Apr-2018 07:00:00, NaN  
10-Apr-2018 08:00:00, NaN  
10-Apr-2018 09:00:00, NaN  
10-Apr-2018 10:00:00, NaN  
10-Apr-2018 11:00:00, NaN  
10-Apr-2018 12:00:00, NaN  
10-Apr-2018 13:00:00, NaN  
10-Apr-2018 14:00:00, NaN  
10-Apr-2018 15:00:00, NaN  
10-Apr-2018 16:00:00, NaN  
10-Apr-2018 17:00:00, NaN  
10-Apr-2018 18:00:00, NaN  
10-Apr-2018 19:00:00, NaN  
10-Apr-2018 20:00:00, NaN  
10-Apr-2018 21:00:00, NaN  
10-Apr-2018 22:00:00, NaN  
10-Apr-2018 23:00:00, NaN  
11-Apr-2018, NaN  
11-Apr-2018 01:00:00, NaN  
11-Apr-2018 02:00:00, NaN  
11-Apr-2018 03:00:00, NaN  
11-Apr-2018 04:00:00, NaN  
11-Apr-2018 05:00:00, NaN  
11-Apr-2018 06:00:00, NaN



11-Apr-2018 07:00:00, NaN  
11-Apr-2018 08:00:00, NaN  
11-Apr-2018 09:00:00, NaN  
11-Apr-2018 10:00:00, NaN  
11-Apr-2018 11:00:00, NaN  
11-Apr-2018 12:00:00, NaN  
11-Apr-2018 13:00:00, NaN  
11-Apr-2018 14:00:00, NaN  
11-Apr-2018 15:00:00, NaN  
11-Apr-2018 16:00:00, NaN  
11-Apr-2018 17:00:00, NaN  
11-Apr-2018 18:00:00, NaN  
11-Apr-2018 19:00:00, NaN  
11-Apr-2018 20:00:00, NaN  
11-Apr-2018 21:00:00, NaN  
11-Apr-2018 22:00:00, NaN  
11-Apr-2018 23:00:00, NaN  
12-Apr-2018, NaN  
12-Apr-2018 01:00:00, NaN  
12-Apr-2018 02:00:00, NaN  
12-Apr-2018 03:00:00, NaN  
12-Apr-2018 04:00:00, NaN  
12-Apr-2018 05:00:00, NaN  
12-Apr-2018 06:00:00, NaN  
12-Apr-2018 07:00:00, NaN  
12-Apr-2018 08:00:00, NaN  
12-Apr-2018 09:00:00, NaN  
12-Apr-2018 10:00:00, NaN  
12-Apr-2018 11:00:00, NaN  
12-Apr-2018 12:00:00, NaN  
12-Apr-2018 13:00:00, NaN  
12-Apr-2018 14:00:00, NaN  
12-Apr-2018 15:00:00, NaN  
12-Apr-2018 16:00:00, NaN  
12-Apr-2018 17:00:00, NaN  
12-Apr-2018 18:00:00, NaN  
12-Apr-2018 19:00:00, NaN  
12-Apr-2018 20:00:00, NaN  
12-Apr-2018 21:00:00, NaN  
12-Apr-2018 22:00:00, NaN  
12-Apr-2018 23:00:00, NaN  
13-Apr-2018, NaN  
13-Apr-2018 01:00:00, NaN  
13-Apr-2018 02:00:00, NaN  
13-Apr-2018 03:00:00, NaN  
13-Apr-2018 04:00:00, NaN  
13-Apr-2018 05:00:00, NaN  
13-Apr-2018 06:00:00, NaN  
13-Apr-2018 07:00:00, NaN  
13-Apr-2018 08:00:00, NaN  
13-Apr-2018 09:00:00, NaN  
13-Apr-2018 10:00:00, NaN  
13-Apr-2018 11:00:00, NaN  
13-Apr-2018 12:00:00, NaN  
13-Apr-2018 13:00:00, NaN  
13-Apr-2018 14:00:00, NaN  
13-Apr-2018 15:00:00, NaN  
13-Apr-2018 16:00:00, NaN  
13-Apr-2018 17:00:00, NaN  
13-Apr-2018 18:00:00, NaN  
13-Apr-2018 19:00:00, NaN  
13-Apr-2018 20:00:00, NaN  
13-Apr-2018 21:00:00, NaN  
13-Apr-2018 22:00:00, NaN

13-Apr-2018 23:00:00, NaN  
14-Apr-2018, NaN  
14-Apr-2018 01:00:00, NaN  
14-Apr-2018 02:00:00, NaN  
14-Apr-2018 03:00:00, NaN  
14-Apr-2018 04:00:00, NaN  
14-Apr-2018 05:00:00, NaN  
14-Apr-2018 06:00:00, NaN  
14-Apr-2018 07:00:00, NaN  
14-Apr-2018 08:00:00, NaN  
14-Apr-2018 09:00:00, NaN  
14-Apr-2018 10:00:00, NaN  
14-Apr-2018 11:00:00, NaN  
14-Apr-2018 12:00:00, NaN  
14-Apr-2018 13:00:00, NaN  
14-Apr-2018 14:00:00, NaN  
14-Apr-2018 15:00:00, NaN  
14-Apr-2018 16:00:00, NaN  
14-Apr-2018 17:00:00, NaN  
14-Apr-2018 18:00:00, NaN  
14-Apr-2018 19:00:00, NaN  
14-Apr-2018 20:00:00, NaN  
14-Apr-2018 21:00:00, NaN  
14-Apr-2018 22:00:00, NaN  
14-Apr-2018 23:00:00, NaN  
15-Apr-2018, NaN  
15-Apr-2018 01:00:00, NaN  
15-Apr-2018 02:00:00, NaN  
15-Apr-2018 03:00:00, NaN  
15-Apr-2018 04:00:00, NaN  
15-Apr-2018 05:00:00, NaN  
15-Apr-2018 06:00:00, NaN  
15-Apr-2018 07:00:00, NaN  
15-Apr-2018 08:00:00, NaN  
15-Apr-2018 09:00:00, NaN  
15-Apr-2018 10:00:00, NaN  
15-Apr-2018 11:00:00, NaN  
15-Apr-2018 12:00:00, NaN  
15-Apr-2018 13:00:00, NaN  
15-Apr-2018 14:00:00, NaN  
15-Apr-2018 15:00:00, NaN  
15-Apr-2018 16:00:00, NaN  
15-Apr-2018 17:00:00, NaN  
15-Apr-2018 18:00:00, NaN  
15-Apr-2018 19:00:00, NaN  
15-Apr-2018 20:00:00, NaN  
15-Apr-2018 21:00:00, NaN  
15-Apr-2018 22:00:00, NaN  
15-Apr-2018 23:00:00, NaN  
16-Apr-2018, NaN  
16-Apr-2018 01:00:00, NaN  
16-Apr-2018 02:00:00, NaN  
16-Apr-2018 03:00:00, NaN  
16-Apr-2018 04:00:00, NaN  
16-Apr-2018 05:00:00, NaN  
16-Apr-2018 06:00:00, NaN  
16-Apr-2018 07:00:00, NaN  
16-Apr-2018 08:00:00, NaN  
16-Apr-2018 09:00:00, NaN  
16-Apr-2018 10:00:00, NaN  
16-Apr-2018 11:00:00, NaN  
16-Apr-2018 12:00:00, NaN  
16-Apr-2018 13:00:00, NaN  
16-Apr-2018 14:00:00, NaN

16-Apr-2018 15:00:00, NaN  
16-Apr-2018 16:00:00, NaN  
16-Apr-2018 17:00:00, NaN  
16-Apr-2018 18:00:00, NaN  
16-Apr-2018 19:00:00, NaN  
16-Apr-2018 20:00:00, NaN  
16-Apr-2018 21:00:00, NaN  
16-Apr-2018 22:00:00, NaN  
16-Apr-2018 23:00:00, NaN  
17-Apr-2018, NaN  
17-Apr-2018 01:00:00, NaN  
17-Apr-2018 02:00:00, NaN  
17-Apr-2018 03:00:00, NaN  
17-Apr-2018 04:00:00, NaN  
17-Apr-2018 05:00:00, NaN  
17-Apr-2018 06:00:00, NaN  
17-Apr-2018 07:00:00, NaN  
17-Apr-2018 08:00:00, NaN  
17-Apr-2018 09:00:00, NaN  
17-Apr-2018 10:00:00, NaN  
17-Apr-2018 11:00:00, NaN  
17-Apr-2018 12:00:00, NaN  
17-Apr-2018 13:00:00, NaN  
17-Apr-2018 14:00:00, NaN  
17-Apr-2018 15:00:00, NaN  
17-Apr-2018 16:00:00, NaN  
17-Apr-2018 17:00:00, NaN  
17-Apr-2018 18:00:00, NaN  
17-Apr-2018 19:00:00, NaN  
17-Apr-2018 20:00:00, NaN  
17-Apr-2018 21:00:00, NaN  
17-Apr-2018 22:00:00, NaN  
17-Apr-2018 23:00:00, NaN  
18-Apr-2018, NaN  
18-Apr-2018 01:00:00, NaN  
18-Apr-2018 02:00:00, NaN  
18-Apr-2018 03:00:00, NaN  
18-Apr-2018 04:00:00, NaN  
18-Apr-2018 05:00:00, NaN  
18-Apr-2018 06:00:00, NaN  
18-Apr-2018 07:00:00, NaN  
18-Apr-2018 08:00:00, NaN  
18-Apr-2018 09:00:00, NaN  
18-Apr-2018 10:00:00, NaN  
18-Apr-2018 11:00:00, NaN  
18-Apr-2018 12:00:00, NaN  
18-Apr-2018 13:00:00, NaN  
18-Apr-2018 14:00:00, NaN  
18-Apr-2018 15:00:00, NaN  
18-Apr-2018 16:00:00, NaN  
18-Apr-2018 17:00:00, NaN  
18-Apr-2018 18:00:00, NaN  
18-Apr-2018 19:00:00, NaN  
18-Apr-2018 20:00:00, NaN  
18-Apr-2018 21:00:00, NaN  
18-Apr-2018 22:00:00, NaN  
18-Apr-2018 23:00:00, NaN  
19-Apr-2018, NaN  
19-Apr-2018 01:00:00, NaN  
19-Apr-2018 02:00:00, NaN  
19-Apr-2018 03:00:00, NaN  
19-Apr-2018 04:00:00, NaN  
19-Apr-2018 05:00:00, NaN  
19-Apr-2018 06:00:00, NaN

19-Apr-2018 07:00:00, NaN  
19-Apr-2018 08:00:00, NaN  
19-Apr-2018 09:00:00, NaN  
19-Apr-2018 10:00:00, NaN  
19-Apr-2018 11:00:00, NaN  
19-Apr-2018 12:00:00, NaN  
19-Apr-2018 13:00:00, NaN  
19-Apr-2018 14:00:00, NaN  
19-Apr-2018 15:00:00, NaN  
19-Apr-2018 16:00:00, NaN  
19-Apr-2018 17:00:00, NaN  
19-Apr-2018 18:00:00, NaN  
19-Apr-2018 19:00:00, NaN  
19-Apr-2018 20:00:00, NaN  
19-Apr-2018 21:00:00, NaN  
19-Apr-2018 22:00:00, NaN  
19-Apr-2018 23:00:00, NaN  
20-Apr-2018, NaN  
20-Apr-2018 01:00:00, NaN  
20-Apr-2018 02:00:00, NaN  
20-Apr-2018 03:00:00, NaN  
20-Apr-2018 04:00:00, NaN  
20-Apr-2018 05:00:00, NaN  
20-Apr-2018 06:00:00, NaN  
20-Apr-2018 07:00:00, NaN  
20-Apr-2018 08:00:00, NaN  
20-Apr-2018 09:00:00, NaN  
20-Apr-2018 10:00:00, NaN  
20-Apr-2018 11:00:00, NaN  
20-Apr-2018 12:00:00, NaN  
20-Apr-2018 13:00:00, NaN  
20-Apr-2018 14:00:00, NaN  
20-Apr-2018 15:00:00, NaN  
20-Apr-2018 16:00:00, NaN  
20-Apr-2018 17:00:00, NaN  
20-Apr-2018 18:00:00, NaN  
20-Apr-2018 19:00:00, NaN  
20-Apr-2018 20:00:00, NaN  
20-Apr-2018 21:00:00, NaN  
20-Apr-2018 22:00:00, NaN  
20-Apr-2018 23:00:00, NaN  
21-Apr-2018, NaN  
21-Apr-2018 01:00:00, NaN  
21-Apr-2018 02:00:00, NaN  
21-Apr-2018 03:00:00, NaN  
21-Apr-2018 04:00:00, NaN  
21-Apr-2018 05:00:00, NaN  
21-Apr-2018 06:00:00, NaN  
21-Apr-2018 07:00:00, NaN  
21-Apr-2018 08:00:00, NaN  
21-Apr-2018 09:00:00, NaN  
21-Apr-2018 10:00:00, NaN  
21-Apr-2018 11:00:00, NaN  
21-Apr-2018 12:00:00, NaN  
21-Apr-2018 13:00:00, NaN  
21-Apr-2018 14:00:00, NaN  
21-Apr-2018 15:00:00, NaN  
21-Apr-2018 16:00:00, NaN  
21-Apr-2018 17:00:00, NaN  
21-Apr-2018 18:00:00, NaN  
21-Apr-2018 19:00:00, NaN  
21-Apr-2018 20:00:00, NaN  
21-Apr-2018 21:00:00, NaN  
21-Apr-2018 22:00:00, NaN

21-Apr-2018 23:00:00, NaN  
22-Apr-2018, NaN  
22-Apr-2018 01:00:00, NaN  
22-Apr-2018 02:00:00, NaN  
22-Apr-2018 03:00:00, NaN  
22-Apr-2018 04:00:00, NaN  
22-Apr-2018 05:00:00, NaN  
22-Apr-2018 06:00:00, NaN  
22-Apr-2018 07:00:00, NaN  
22-Apr-2018 08:00:00, NaN  
22-Apr-2018 09:00:00, NaN  
22-Apr-2018 10:00:00, NaN  
22-Apr-2018 11:00:00, NaN  
22-Apr-2018 12:00:00, NaN  
22-Apr-2018 13:00:00, NaN  
22-Apr-2018 14:00:00, NaN  
22-Apr-2018 15:00:00, NaN  
22-Apr-2018 16:00:00, NaN  
22-Apr-2018 17:00:00, NaN  
22-Apr-2018 18:00:00, NaN  
22-Apr-2018 19:00:00, NaN  
22-Apr-2018 20:00:00, NaN  
22-Apr-2018 21:00:00, NaN  
22-Apr-2018 22:00:00, NaN  
22-Apr-2018 23:00:00, NaN  
23-Apr-2018, NaN  
23-Apr-2018 01:00:00, NaN  
23-Apr-2018 02:00:00, NaN  
23-Apr-2018 03:00:00, NaN  
23-Apr-2018 04:00:00, NaN  
23-Apr-2018 05:00:00, NaN  
23-Apr-2018 06:00:00, NaN  
23-Apr-2018 07:00:00, NaN  
23-Apr-2018 08:00:00, NaN  
23-Apr-2018 09:00:00, NaN  
23-Apr-2018 10:00:00, NaN  
23-Apr-2018 11:00:00, NaN  
23-Apr-2018 12:00:00, NaN  
23-Apr-2018 13:00:00, NaN  
23-Apr-2018 14:00:00, NaN  
23-Apr-2018 15:00:00, NaN  
23-Apr-2018 16:00:00, NaN  
23-Apr-2018 17:00:00, NaN  
23-Apr-2018 18:00:00, NaN  
23-Apr-2018 19:00:00, NaN  
23-Apr-2018 20:00:00, NaN  
23-Apr-2018 21:00:00, NaN  
23-Apr-2018 22:00:00, NaN  
23-Apr-2018 23:00:00, NaN  
24-Apr-2018, NaN  
24-Apr-2018 01:00:00, NaN  
24-Apr-2018 02:00:00, NaN  
24-Apr-2018 03:00:00, NaN  
24-Apr-2018 04:00:00, NaN  
24-Apr-2018 05:00:00, NaN  
24-Apr-2018 06:00:00, NaN  
24-Apr-2018 07:00:00, NaN  
24-Apr-2018 08:00:00, NaN  
24-Apr-2018 09:00:00, NaN  
24-Apr-2018 10:00:00, NaN  
24-Apr-2018 11:00:00, NaN  
24-Apr-2018 12:00:00, NaN  
24-Apr-2018 13:00:00, NaN  
24-Apr-2018 14:00:00, NaN

24-Apr-2018 15:00:00, NaN  
24-Apr-2018 16:00:00, NaN  
24-Apr-2018 17:00:00, NaN  
24-Apr-2018 18:00:00, NaN  
24-Apr-2018 19:00:00, NaN  
24-Apr-2018 20:00:00, NaN  
24-Apr-2018 21:00:00, NaN  
24-Apr-2018 22:00:00, NaN  
24-Apr-2018 23:00:00, NaN  
25-Apr-2018, NaN  
25-Apr-2018 01:00:00, NaN  
25-Apr-2018 02:00:00, NaN  
25-Apr-2018 03:00:00, NaN  
25-Apr-2018 04:00:00, NaN  
25-Apr-2018 05:00:00, NaN  
25-Apr-2018 06:00:00, NaN  
25-Apr-2018 07:00:00, NaN  
25-Apr-2018 08:00:00, NaN  
25-Apr-2018 09:00:00, NaN  
25-Apr-2018 10:00:00, NaN  
25-Apr-2018 11:00:00, NaN  
25-Apr-2018 12:00:00, NaN  
25-Apr-2018 13:00:00, NaN  
25-Apr-2018 14:00:00, NaN  
25-Apr-2018 15:00:00, NaN  
25-Apr-2018 16:00:00, NaN  
25-Apr-2018 17:00:00, NaN  
25-Apr-2018 18:00:00, NaN  
25-Apr-2018 19:00:00, NaN  
25-Apr-2018 20:00:00, NaN  
25-Apr-2018 21:00:00, NaN  
25-Apr-2018 22:00:00, NaN  
25-Apr-2018 23:00:00, NaN  
26-Apr-2018, NaN  
26-Apr-2018 01:00:00, NaN  
26-Apr-2018 02:00:00, NaN  
26-Apr-2018 03:00:00, NaN  
26-Apr-2018 04:00:00, NaN  
26-Apr-2018 05:00:00, NaN  
26-Apr-2018 06:00:00, NaN  
26-Apr-2018 07:00:00, NaN  
26-Apr-2018 08:00:00, NaN  
26-Apr-2018 09:00:00, NaN  
26-Apr-2018 10:00:00, NaN  
26-Apr-2018 11:00:00, NaN  
26-Apr-2018 12:00:00, NaN  
26-Apr-2018 13:00:00, NaN  
27-Apr-2018 12:00:00, NaN  
27-Apr-2018 13:00:00, NaN  
27-Apr-2018 14:00:00, NaN  
27-Apr-2018 15:00:00, NaN  
27-Apr-2018 16:00:00, NaN  
27-Apr-2018 17:00:00, NaN  
27-Apr-2018 18:00:00, NaN  
27-Apr-2018 19:00:00, NaN  
27-Apr-2018 20:00:00, NaN  
27-Apr-2018 21:00:00, NaN  
27-Apr-2018 22:00:00, NaN  
27-Apr-2018 23:00:00, NaN  
28-Apr-2018, NaN  
28-Apr-2018 01:00:00, NaN  
28-Apr-2018 02:00:00, NaN  
28-Apr-2018 03:00:00, NaN  
28-Apr-2018 04:00:00, NaN

28-Apr-2018 05:00:00, NaN  
28-Apr-2018 06:00:00, NaN  
28-Apr-2018 07:00:00, NaN  
28-Apr-2018 08:00:00, NaN  
28-Apr-2018 09:00:00, NaN  
28-Apr-2018 10:00:00, NaN  
28-Apr-2018 11:00:00, NaN  
28-Apr-2018 12:00:00, NaN  
28-Apr-2018 13:00:00, NaN  
28-Apr-2018 14:00:00, NaN  
28-Apr-2018 15:00:00, NaN  
28-Apr-2018 16:00:00, NaN  
28-Apr-2018 17:00:00, NaN  
28-Apr-2018 18:00:00, NaN  
28-Apr-2018 19:00:00, NaN  
28-Apr-2018 20:00:00, NaN  
28-Apr-2018 21:00:00, NaN  
28-Apr-2018 22:00:00, NaN  
28-Apr-2018 23:00:00, NaN  
29-Apr-2018, NaN  
29-Apr-2018 01:00:00, NaN  
29-Apr-2018 02:00:00, NaN  
29-Apr-2018 03:00:00, NaN  
29-Apr-2018 04:00:00, NaN  
29-Apr-2018 05:00:00, NaN  
29-Apr-2018 06:00:00, NaN  
29-Apr-2018 07:00:00, NaN  
29-Apr-2018 08:00:00, NaN  
29-Apr-2018 09:00:00, NaN  
29-Apr-2018 10:00:00, NaN  
29-Apr-2018 11:00:00, NaN  
29-Apr-2018 12:00:00, NaN  
29-Apr-2018 13:00:00, NaN  
29-Apr-2018 14:00:00, NaN  
29-Apr-2018 15:00:00, NaN  
29-Apr-2018 16:00:00, NaN  
29-Apr-2018 17:00:00, NaN  
29-Apr-2018 18:00:00, NaN  
29-Apr-2018 19:00:00, NaN  
29-Apr-2018 20:00:00, NaN  
29-Apr-2018 21:00:00, NaN  
29-Apr-2018 22:00:00, NaN  
29-Apr-2018 23:00:00, NaN  
30-Apr-2018, NaN  
30-Apr-2018 01:00:00, NaN  
30-Apr-2018 02:00:00, NaN  
30-Apr-2018 03:00:00, NaN  
30-Apr-2018 04:00:00, NaN  
30-Apr-2018 05:00:00, NaN  
30-Apr-2018 06:00:00, NaN  
30-Apr-2018 07:00:00, NaN  
30-Apr-2018 08:00:00, NaN  
30-Apr-2018 09:00:00, NaN  
30-Apr-2018 10:00:00, NaN  
30-Apr-2018 11:00:00, NaN  
30-Apr-2018 12:00:00, NaN  
30-Apr-2018 13:00:00, NaN  
30-Apr-2018 14:00:00, NaN  
30-Apr-2018 15:00:00, NaN  
30-Apr-2018 16:00:00, NaN  
30-Apr-2018 17:00:00, NaN  
30-Apr-2018 18:00:00, NaN  
30-Apr-2018 19:00:00, NaN  
30-Apr-2018 20:00:00, NaN

30-Apr-2018 21:00:00, NaN  
30-Apr-2018 22:00:00, NaN  
30-Apr-2018 23:00:00, NaN  
01-May-2018, NaN  
01-May-2018 01:00:00, NaN  
01-May-2018 02:00:00, NaN  
01-May-2018 03:00:00, NaN  
01-May-2018 04:00:00, NaN  
01-May-2018 05:00:00, NaN  
01-May-2018 06:00:00, NaN  
01-May-2018 07:00:00, NaN  
01-May-2018 08:00:00, NaN  
01-May-2018 09:00:00, NaN  
01-May-2018 10:00:00, NaN  
01-May-2018 11:00:00, NaN  
01-May-2018 12:00:00, NaN  
01-May-2018 13:00:00, NaN  
01-May-2018 14:00:00, NaN  
01-May-2018 15:00:00, NaN  
01-May-2018 16:00:00, NaN  
01-May-2018 17:00:00, NaN  
01-May-2018 18:00:00, NaN  
01-May-2018 19:00:00, NaN  
01-May-2018 20:00:00, NaN  
01-May-2018 21:00:00, NaN  
01-May-2018 22:00:00, NaN  
01-May-2018 23:00:00, NaN  
02-May-2018, NaN  
02-May-2018 01:00:00, NaN  
02-May-2018 02:00:00, NaN  
02-May-2018 03:00:00, NaN  
02-May-2018 04:00:00, NaN  
02-May-2018 05:00:00, NaN  
02-May-2018 06:00:00, NaN  
02-May-2018 07:00:00, NaN  
02-May-2018 08:00:00, NaN  
02-May-2018 09:00:00, NaN  
02-May-2018 10:00:00, NaN  
02-May-2018 11:00:00, NaN  
02-May-2018 12:00:00, NaN  
02-May-2018 13:00:00, NaN  
02-May-2018 14:00:00, NaN  
02-May-2018 15:00:00, NaN  
02-May-2018 16:00:00, NaN  
02-May-2018 17:00:00, NaN  
02-May-2018 18:00:00, NaN  
02-May-2018 19:00:00, NaN  
02-May-2018 20:00:00, NaN  
02-May-2018 21:00:00, NaN  
02-May-2018 22:00:00, NaN  
02-May-2018 23:00:00, NaN  
03-May-2018, NaN  
03-May-2018 01:00:00, NaN  
03-May-2018 02:00:00, NaN  
03-May-2018 03:00:00, NaN  
03-May-2018 04:00:00, NaN  
03-May-2018 05:00:00, NaN  
03-May-2018 06:00:00, NaN  
03-May-2018 07:00:00, NaN  
03-May-2018 08:00:00, NaN  
03-May-2018 09:00:00, NaN  
03-May-2018 10:00:00, NaN  
03-May-2018 11:00:00, NaN  
03-May-2018 12:00:00, NaN



03-May-2018 13:00:00, NaN  
03-May-2018 14:00:00, NaN  
03-May-2018 15:00:00, NaN  
03-May-2018 16:00:00, NaN  
03-May-2018 17:00:00, NaN  
03-May-2018 18:00:00, NaN  
03-May-2018 19:00:00, NaN  
03-May-2018 20:00:00, NaN  
03-May-2018 21:00:00, NaN  
03-May-2018 22:00:00, NaN  
03-May-2018 23:00:00, NaN  
04-May-2018, NaN  
04-May-2018 01:00:00, NaN  
04-May-2018 02:00:00, NaN  
04-May-2018 03:00:00, NaN  
04-May-2018 04:00:00, NaN  
04-May-2018 05:00:00, NaN  
04-May-2018 06:00:00, NaN  
04-May-2018 07:00:00, NaN  
04-May-2018 08:00:00, NaN  
04-May-2018 09:00:00, NaN  
04-May-2018 10:00:00, NaN  
04-May-2018 11:00:00, NaN  
04-May-2018 12:00:00, NaN  
04-May-2018 13:00:00, NaN  
04-May-2018 14:00:00, NaN  
04-May-2018 15:00:00, NaN  
04-May-2018 16:00:00, NaN  
04-May-2018 17:00:00, NaN  
04-May-2018 18:00:00, NaN  
04-May-2018 19:00:00, NaN  
04-May-2018 20:00:00, NaN  
04-May-2018 21:00:00, NaN  
04-May-2018 22:00:00, NaN  
04-May-2018 23:00:00, NaN  
05-May-2018, NaN  
05-May-2018 01:00:00, NaN  
05-May-2018 02:00:00, NaN  
05-May-2018 03:00:00, NaN  
05-May-2018 04:00:00, NaN  
05-May-2018 05:00:00, NaN  
05-May-2018 06:00:00, NaN  
05-May-2018 07:00:00, NaN  
05-May-2018 08:00:00, NaN  
05-May-2018 09:00:00, NaN  
05-May-2018 10:00:00, NaN  
05-May-2018 11:00:00, NaN  
05-May-2018 12:00:00, NaN  
05-May-2018 13:00:00, NaN  
05-May-2018 14:00:00, NaN  
05-May-2018 15:00:00, NaN  
05-May-2018 16:00:00, NaN  
05-May-2018 17:00:00, NaN  
05-May-2018 18:00:00, NaN  
05-May-2018 19:00:00, NaN  
05-May-2018 20:00:00, NaN  
05-May-2018 21:00:00, NaN  
05-May-2018 22:00:00, NaN  
05-May-2018 23:00:00, NaN  
06-May-2018, NaN  
06-May-2018 01:00:00, NaN  
06-May-2018 02:00:00, NaN  
06-May-2018 03:00:00, NaN  
06-May-2018 04:00:00, NaN

06-May-2018 05:00:00, NaN  
06-May-2018 06:00:00, NaN  
06-May-2018 07:00:00, NaN  
06-May-2018 08:00:00, NaN  
06-May-2018 09:00:00, NaN  
06-May-2018 10:00:00, NaN  
06-May-2018 11:00:00, NaN  
06-May-2018 12:00:00, NaN  
06-May-2018 13:00:00, NaN  
06-May-2018 14:00:00, NaN  
06-May-2018 15:00:00, NaN  
06-May-2018 16:00:00, NaN  
06-May-2018 17:00:00, NaN  
06-May-2018 18:00:00, NaN  
06-May-2018 19:00:00, NaN  
06-May-2018 20:00:00, NaN  
06-May-2018 21:00:00, NaN  
06-May-2018 22:00:00, NaN  
06-May-2018 23:00:00, NaN  
07-May-2018, NaN  
07-May-2018 01:00:00, NaN  
07-May-2018 02:00:00, NaN  
07-May-2018 03:00:00, NaN  
07-May-2018 04:00:00, NaN  
07-May-2018 05:00:00, NaN  
07-May-2018 06:00:00, NaN  
07-May-2018 07:00:00, NaN  
07-May-2018 08:00:00, NaN  
07-May-2018 09:00:00, NaN  
07-May-2018 10:00:00, NaN  
07-May-2018 11:00:00, NaN  
07-May-2018 12:00:00, NaN  
07-May-2018 13:00:00, NaN  
07-May-2018 14:00:00, NaN  
07-May-2018 15:00:00, NaN  
07-May-2018 16:00:00, NaN  
07-May-2018 17:00:00, NaN  
07-May-2018 18:00:00, NaN  
07-May-2018 19:00:00, NaN  
07-May-2018 20:00:00, NaN  
07-May-2018 21:00:00, NaN  
07-May-2018 22:00:00, NaN  
07-May-2018 23:00:00, NaN  
08-May-2018, NaN  
08-May-2018 01:00:00, NaN  
08-May-2018 02:00:00, NaN  
08-May-2018 03:00:00, NaN  
08-May-2018 04:00:00, NaN  
08-May-2018 05:00:00, NaN  
08-May-2018 06:00:00, NaN  
08-May-2018 07:00:00, NaN  
08-May-2018 08:00:00, NaN  
08-May-2018 09:00:00, NaN  
08-May-2018 10:00:00, NaN  
08-May-2018 11:00:00, NaN  
08-May-2018 12:00:00, NaN  
08-May-2018 13:00:00, NaN  
08-May-2018 14:00:00, NaN  
08-May-2018 15:00:00, NaN  
08-May-2018 16:00:00, NaN  
08-May-2018 17:00:00, NaN  
08-May-2018 18:00:00, NaN  
08-May-2018 19:00:00, NaN  
08-May-2018 20:00:00, NaN

08-May-2018 21:00:00, NaN  
08-May-2018 22:00:00, NaN  
08-May-2018 23:00:00, NaN  
09-May-2018, NaN  
09-May-2018 01:00:00, NaN  
09-May-2018 02:00:00, NaN  
09-May-2018 03:00:00, NaN  
09-May-2018 04:00:00, NaN  
09-May-2018 05:00:00, NaN  
09-May-2018 06:00:00, NaN  
09-May-2018 07:00:00, NaN  
09-May-2018 08:00:00, NaN  
09-May-2018 09:00:00, NaN  
09-May-2018 10:00:00, NaN  
09-May-2018 11:00:00, NaN  
09-May-2018 12:00:00, NaN  
09-May-2018 13:00:00, NaN  
09-May-2018 14:00:00, NaN  
09-May-2018 15:00:00, NaN  
09-May-2018 16:00:00, NaN  
09-May-2018 17:00:00, NaN  
09-May-2018 18:00:00, NaN  
09-May-2018 19:00:00, NaN  
09-May-2018 20:00:00, NaN  
09-May-2018 21:00:00, NaN  
09-May-2018 22:00:00, NaN  
09-May-2018 23:00:00, NaN  
10-May-2018, NaN  
10-May-2018 01:00:00, NaN  
10-May-2018 02:00:00, NaN  
10-May-2018 03:00:00, NaN  
10-May-2018 04:00:00, NaN  
10-May-2018 05:00:00, NaN  
10-May-2018 06:00:00, NaN  
10-May-2018 07:00:00, NaN  
10-May-2018 08:00:00, NaN  
10-May-2018 09:00:00, NaN  
10-May-2018 10:00:00, NaN  
10-May-2018 11:00:00, NaN  
10-May-2018 12:00:00, NaN  
10-May-2018 13:00:00, NaN  
10-May-2018 14:00:00, NaN  
10-May-2018 15:00:00, NaN  
10-May-2018 16:00:00, NaN  
10-May-2018 17:00:00, NaN  
10-May-2018 18:00:00, NaN  
10-May-2018 19:00:00, NaN  
10-May-2018 20:00:00, NaN  
10-May-2018 21:00:00, NaN  
10-May-2018 22:00:00, NaN  
10-May-2018 23:00:00, NaN  
11-May-2018, NaN  
11-May-2018 01:00:00, NaN  
11-May-2018 02:00:00, NaN  
11-May-2018 03:00:00, NaN  
11-May-2018 04:00:00, NaN  
11-May-2018 05:00:00, NaN  
11-May-2018 06:00:00, NaN  
11-May-2018 07:00:00, NaN  
11-May-2018 08:00:00, NaN  
11-May-2018 09:00:00, NaN  
11-May-2018 10:00:00, NaN  
11-May-2018 11:00:00, NaN  
11-May-2018 12:00:00, NaN

11-May-2018 13:00:00, NaN  
11-May-2018 14:00:00, NaN  
11-May-2018 15:00:00, NaN  
11-May-2018 16:00:00, NaN  
11-May-2018 17:00:00, NaN  
11-May-2018 18:00:00, NaN  
11-May-2018 19:00:00, NaN  
11-May-2018 20:00:00, NaN  
11-May-2018 21:00:00, NaN  
11-May-2018 22:00:00, NaN  
11-May-2018 23:00:00, NaN  
12-May-2018, NaN  
12-May-2018 01:00:00, NaN  
12-May-2018 02:00:00, NaN  
12-May-2018 03:00:00, NaN  
12-May-2018 04:00:00, NaN  
12-May-2018 05:00:00, NaN  
12-May-2018 06:00:00, NaN  
12-May-2018 07:00:00, NaN  
12-May-2018 08:00:00, NaN  
12-May-2018 09:00:00, NaN  
12-May-2018 10:00:00, NaN  
12-May-2018 11:00:00, NaN  
12-May-2018 12:00:00, NaN  
12-May-2018 13:00:00, NaN  
12-May-2018 14:00:00, NaN  
12-May-2018 15:00:00, NaN  
12-May-2018 16:00:00, NaN  
12-May-2018 17:00:00, NaN  
12-May-2018 18:00:00, NaN  
12-May-2018 19:00:00, NaN  
12-May-2018 20:00:00, NaN  
12-May-2018 21:00:00, NaN  
12-May-2018 22:00:00, NaN  
12-May-2018 23:00:00, NaN  
13-May-2018, NaN  
13-May-2018 01:00:00, NaN  
13-May-2018 02:00:00, NaN  
13-May-2018 03:00:00, NaN  
13-May-2018 04:00:00, NaN  
13-May-2018 05:00:00, NaN  
13-May-2018 06:00:00, NaN  
13-May-2018 07:00:00, NaN  
13-May-2018 08:00:00, NaN  
13-May-2018 09:00:00, NaN  
13-May-2018 10:00:00, NaN  
13-May-2018 11:00:00, NaN  
13-May-2018 12:00:00, NaN  
13-May-2018 13:00:00, NaN  
13-May-2018 14:00:00, NaN  
13-May-2018 15:00:00, NaN  
13-May-2018 16:00:00, NaN  
13-May-2018 17:00:00, NaN  
13-May-2018 18:00:00, NaN  
13-May-2018 19:00:00, NaN  
13-May-2018 20:00:00, NaN  
13-May-2018 21:00:00, NaN  
13-May-2018 22:00:00, NaN  
13-May-2018 23:00:00, NaN  
14-May-2018, NaN  
14-May-2018 01:00:00, NaN  
14-May-2018 02:00:00, NaN  
14-May-2018 03:00:00, NaN  
14-May-2018 04:00:00, NaN

14-May-2018 05:00:00, NaN  
14-May-2018 06:00:00, NaN  
14-May-2018 07:00:00, NaN  
14-May-2018 08:00:00, NaN  
14-May-2018 09:00:00, NaN  
14-May-2018 10:00:00, NaN  
14-May-2018 11:00:00, NaN  
14-May-2018 12:00:00, NaN  
14-May-2018 13:00:00, NaN  
14-May-2018 14:00:00, NaN  
14-May-2018 15:00:00, NaN  
14-May-2018 16:00:00, NaN  
14-May-2018 17:00:00, NaN  
14-May-2018 18:00:00, NaN  
14-May-2018 19:00:00, NaN  
14-May-2018 20:00:00, NaN  
14-May-2018 21:00:00, NaN  
14-May-2018 22:00:00, NaN  
14-May-2018 23:00:00, NaN  
15-May-2018, NaN  
15-May-2018 01:00:00, NaN  
15-May-2018 02:00:00, NaN  
15-May-2018 03:00:00, NaN  
15-May-2018 04:00:00, NaN  
15-May-2018 05:00:00, NaN  
15-May-2018 06:00:00, NaN  
15-May-2018 07:00:00, NaN  
15-May-2018 08:00:00, NaN  
15-May-2018 09:00:00, NaN  
15-May-2018 10:00:00, NaN  
15-May-2018 11:00:00, NaN  
15-May-2018 12:00:00, NaN  
15-May-2018 13:00:00, NaN  
15-May-2018 14:00:00, NaN  
15-May-2018 15:00:00, NaN  
15-May-2018 16:00:00, NaN  
15-May-2018 17:00:00, NaN  
15-May-2018 18:00:00, NaN  
15-May-2018 19:00:00, NaN  
15-May-2018 20:00:00, NaN  
15-May-2018 21:00:00, NaN  
15-May-2018 22:00:00, NaN  
15-May-2018 23:00:00, NaN  
16-May-2018, NaN  
16-May-2018 01:00:00, NaN  
16-May-2018 02:00:00, NaN  
16-May-2018 03:00:00, NaN  
16-May-2018 04:00:00, NaN  
16-May-2018 05:00:00, NaN  
16-May-2018 06:00:00, NaN  
16-May-2018 07:00:00, NaN  
16-May-2018 08:00:00, NaN  
16-May-2018 09:00:00, NaN  
16-May-2018 10:00:00, NaN  
16-May-2018 11:00:00, NaN  
16-May-2018 12:00:00, NaN  
16-May-2018 13:00:00, NaN  
16-May-2018 14:00:00, NaN  
16-May-2018 15:00:00, NaN  
16-May-2018 16:00:00, NaN  
16-May-2018 17:00:00, NaN  
16-May-2018 18:00:00, NaN  
16-May-2018 19:00:00, NaN  
16-May-2018 20:00:00, NaN

16-May-2018 21:00:00, NaN  
16-May-2018 22:00:00, NaN  
16-May-2018 23:00:00, NaN  
17-May-2018, NaN  
17-May-2018 01:00:00, NaN  
17-May-2018 02:00:00, NaN  
17-May-2018 03:00:00, NaN  
17-May-2018 04:00:00, NaN  
17-May-2018 05:00:00, NaN  
17-May-2018 06:00:00, NaN  
17-May-2018 07:00:00, NaN  
17-May-2018 08:00:00, NaN  
17-May-2018 09:00:00, NaN  
17-May-2018 10:00:00, NaN  
17-May-2018 11:00:00, NaN  
17-May-2018 12:00:00, NaN  
17-May-2018 13:00:00, NaN  
17-May-2018 14:00:00, NaN  
17-May-2018 15:00:00, NaN  
17-May-2018 16:00:00, NaN  
17-May-2018 17:00:00, NaN  
17-May-2018 18:00:00, NaN  
17-May-2018 19:00:00, NaN  
17-May-2018 20:00:00, NaN  
17-May-2018 21:00:00, NaN  
17-May-2018 22:00:00, NaN  
17-May-2018 23:00:00, NaN  
18-May-2018, NaN  
18-May-2018 01:00:00, NaN  
18-May-2018 02:00:00, NaN  
18-May-2018 03:00:00, NaN  
18-May-2018 04:00:00, NaN  
18-May-2018 05:00:00, NaN  
18-May-2018 06:00:00, NaN  
18-May-2018 07:00:00, NaN  
18-May-2018 08:00:00, NaN  
18-May-2018 09:00:00, NaN  
18-May-2018 10:00:00, NaN  
18-May-2018 11:00:00, NaN  
18-May-2018 12:00:00, NaN  
18-May-2018 13:00:00, NaN  
18-May-2018 14:00:00, NaN  
18-May-2018 15:00:00, NaN  
18-May-2018 16:00:00, NaN  
18-May-2018 17:00:00, NaN  
18-May-2018 18:00:00, NaN  
18-May-2018 19:00:00, NaN  
18-May-2018 20:00:00, NaN  
18-May-2018 21:00:00, NaN  
18-May-2018 22:00:00, NaN  
18-May-2018 23:00:00, NaN  
19-May-2018, NaN  
19-May-2018 01:00:00, NaN  
19-May-2018 02:00:00, NaN  
19-May-2018 03:00:00, NaN  
19-May-2018 04:00:00, NaN  
19-May-2018 05:00:00, NaN  
19-May-2018 06:00:00, NaN  
19-May-2018 07:00:00, NaN  
19-May-2018 08:00:00, NaN  
19-May-2018 09:00:00, NaN  
19-May-2018 10:00:00, NaN  
19-May-2018 11:00:00, NaN  
19-May-2018 12:00:00, NaN

19-May-2018 13:00:00, NaN  
19-May-2018 14:00:00, NaN  
19-May-2018 15:00:00, NaN  
19-May-2018 16:00:00, NaN  
19-May-2018 17:00:00, NaN  
19-May-2018 18:00:00, NaN  
19-May-2018 19:00:00, NaN  
19-May-2018 20:00:00, NaN  
19-May-2018 21:00:00, NaN  
19-May-2018 22:00:00, NaN  
19-May-2018 23:00:00, NaN  
20-May-2018, NaN  
20-May-2018 01:00:00, NaN  
20-May-2018 02:00:00, NaN  
20-May-2018 03:00:00, NaN  
20-May-2018 04:00:00, NaN  
20-May-2018 05:00:00, NaN  
20-May-2018 06:00:00, NaN  
20-May-2018 07:00:00, NaN  
20-May-2018 08:00:00, NaN  
20-May-2018 09:00:00, NaN  
20-May-2018 10:00:00, NaN  
20-May-2018 11:00:00, NaN  
20-May-2018 12:00:00, NaN  
20-May-2018 13:00:00, NaN  
20-May-2018 14:00:00, NaN  
20-May-2018 15:00:00, NaN  
20-May-2018 16:00:00, NaN  
20-May-2018 17:00:00, NaN  
20-May-2018 18:00:00, NaN  
20-May-2018 19:00:00, NaN  
20-May-2018 20:00:00, NaN  
20-May-2018 21:00:00, NaN  
20-May-2018 22:00:00, NaN  
20-May-2018 23:00:00, NaN  
21-May-2018, NaN  
21-May-2018 01:00:00, NaN  
21-May-2018 02:00:00, NaN  
21-May-2018 03:00:00, NaN  
21-May-2018 04:00:00, NaN  
21-May-2018 05:00:00, NaN  
21-May-2018 06:00:00, NaN  
21-May-2018 07:00:00, NaN  
21-May-2018 08:00:00, NaN  
21-May-2018 09:00:00, NaN  
21-May-2018 10:00:00, NaN  
21-May-2018 11:00:00, NaN  
21-May-2018 12:00:00, NaN  
21-May-2018 13:00:00, NaN  
21-May-2018 14:00:00, NaN  
21-May-2018 15:00:00, NaN  
21-May-2018 16:00:00, NaN  
21-May-2018 17:00:00, NaN  
21-May-2018 18:00:00, NaN  
21-May-2018 19:00:00, NaN  
21-May-2018 20:00:00, NaN  
21-May-2018 21:00:00, NaN  
21-May-2018 22:00:00, NaN  
21-May-2018 23:00:00, NaN  
22-May-2018, NaN  
22-May-2018 01:00:00, NaN  
22-May-2018 02:00:00, NaN  
22-May-2018 03:00:00, NaN  
22-May-2018 04:00:00, NaN

22-May-2018 05:00:00, NaN  
22-May-2018 06:00:00, NaN  
22-May-2018 07:00:00, NaN  
22-May-2018 08:00:00, NaN  
22-May-2018 09:00:00, NaN  
22-May-2018 10:00:00, NaN  
22-May-2018 11:00:00, NaN  
22-May-2018 12:00:00, NaN  
22-May-2018 13:00:00, NaN  
22-May-2018 14:00:00, NaN  
22-May-2018 15:00:00, NaN  
22-May-2018 16:00:00, NaN  
22-May-2018 17:00:00, NaN  
22-May-2018 18:00:00, NaN  
22-May-2018 19:00:00, NaN  
22-May-2018 20:00:00, NaN  
22-May-2018 21:00:00, NaN  
22-May-2018 22:00:00, NaN  
22-May-2018 23:00:00, NaN  
23-May-2018, NaN  
23-May-2018 01:00:00, NaN  
23-May-2018 02:00:00, NaN  
23-May-2018 03:00:00, NaN  
23-May-2018 04:00:00, NaN  
23-May-2018 05:00:00, NaN  
23-May-2018 06:00:00, NaN  
23-May-2018 07:00:00, NaN  
23-May-2018 08:00:00, NaN  
23-May-2018 09:00:00, NaN  
23-May-2018 10:00:00, NaN  
23-May-2018 11:00:00, NaN  
23-May-2018 12:00:00, NaN  
23-May-2018 13:00:00, NaN  
23-May-2018 14:00:00, NaN  
23-May-2018 15:00:00, NaN  
23-May-2018 16:00:00, NaN  
23-May-2018 17:00:00, NaN  
23-May-2018 18:00:00, NaN  
23-May-2018 19:00:00, NaN  
23-May-2018 20:00:00, NaN  
23-May-2018 21:00:00, NaN  
23-May-2018 22:00:00, NaN  
23-May-2018 23:00:00, NaN  
24-May-2018, NaN  
24-May-2018 01:00:00, NaN  
24-May-2018 02:00:00, NaN  
24-May-2018 03:00:00, NaN  
24-May-2018 04:00:00, NaN  
24-May-2018 05:00:00, NaN  
24-May-2018 06:00:00, NaN  
24-May-2018 07:00:00, NaN  
24-May-2018 08:00:00, NaN  
24-May-2018 09:00:00, NaN  
24-May-2018 10:00:00, NaN  
24-May-2018 11:00:00, NaN  
24-May-2018 12:00:00, NaN  
24-May-2018 13:00:00, NaN  
24-May-2018 14:00:00, NaN  
24-May-2018 15:00:00, NaN  
24-May-2018 16:00:00, NaN  
24-May-2018 17:00:00, NaN  
24-May-2018 18:00:00, NaN  
24-May-2018 19:00:00, NaN  
24-May-2018 20:00:00, NaN



24-May-2018 21:00:00, NaN  
24-May-2018 22:00:00, NaN  
24-May-2018 23:00:00, NaN  
25-May-2018, NaN  
25-May-2018 01:00:00, NaN  
25-May-2018 02:00:00, NaN  
25-May-2018 03:00:00, NaN  
25-May-2018 04:00:00, NaN  
25-May-2018 05:00:00, NaN  
25-May-2018 06:00:00, NaN  
25-May-2018 07:00:00, NaN  
25-May-2018 08:00:00, NaN  
25-May-2018 09:00:00, NaN  
25-May-2018 10:00:00, NaN  
25-May-2018 11:00:00, NaN  
25-May-2018 12:00:00, NaN  
25-May-2018 13:00:00, NaN  
25-May-2018 14:00:00, NaN  
25-May-2018 15:00:00, NaN  
25-May-2018 16:00:00, NaN  
25-May-2018 17:00:00, NaN  
25-May-2018 18:00:00, NaN  
25-May-2018 19:00:00, NaN  
25-May-2018 20:00:00, NaN  
25-May-2018 21:00:00, NaN  
25-May-2018 22:00:00, NaN  
25-May-2018 23:00:00, NaN  
26-May-2018, NaN  
26-May-2018 01:00:00, NaN  
26-May-2018 02:00:00, NaN  
26-May-2018 03:00:00, NaN  
26-May-2018 04:00:00, NaN  
26-May-2018 05:00:00, NaN  
26-May-2018 06:00:00, NaN  
26-May-2018 07:00:00, NaN  
26-May-2018 08:00:00, NaN  
26-May-2018 09:00:00, NaN  
26-May-2018 10:00:00, NaN  
26-May-2018 11:00:00, NaN  
26-May-2018 12:00:00, NaN  
26-May-2018 13:00:00, NaN  
26-May-2018 14:00:00, NaN  
26-May-2018 15:00:00, NaN  
26-May-2018 16:00:00, NaN  
26-May-2018 17:00:00, NaN  
26-May-2018 18:00:00, NaN  
26-May-2018 19:00:00, NaN  
26-May-2018 20:00:00, NaN  
26-May-2018 21:00:00, NaN  
26-May-2018 22:00:00, NaN  
26-May-2018 23:00:00, NaN  
27-May-2018, NaN  
27-May-2018 01:00:00, NaN  
27-May-2018 02:00:00, NaN  
27-May-2018 03:00:00, NaN  
27-May-2018 04:00:00, NaN  
27-May-2018 05:00:00, NaN  
27-May-2018 06:00:00, NaN  
27-May-2018 07:00:00, NaN  
27-May-2018 08:00:00, NaN  
27-May-2018 09:00:00, NaN  
27-May-2018 10:00:00, NaN  
27-May-2018 11:00:00, NaN  
27-May-2018 12:00:00, NaN

27-May-2018 13:00:00, NaN  
27-May-2018 14:00:00, NaN  
27-May-2018 15:00:00, NaN  
27-May-2018 16:00:00, NaN  
27-May-2018 17:00:00, NaN  
27-May-2018 18:00:00, NaN  
27-May-2018 19:00:00, NaN  
27-May-2018 20:00:00, NaN  
27-May-2018 21:00:00, NaN  
27-May-2018 22:00:00, NaN  
27-May-2018 23:00:00, NaN  
28-May-2018, NaN  
28-May-2018 01:00:00, NaN  
28-May-2018 02:00:00, NaN  
28-May-2018 03:00:00, NaN  
28-May-2018 04:00:00, NaN  
28-May-2018 05:00:00, NaN  
28-May-2018 06:00:00, NaN  
28-May-2018 07:00:00, NaN  
28-May-2018 08:00:00, NaN  
28-May-2018 09:00:00, NaN  
28-May-2018 10:00:00, NaN  
28-May-2018 11:00:00, NaN  
28-May-2018 12:00:00, NaN  
28-May-2018 13:00:00, NaN  
28-May-2018 14:00:00, NaN  
28-May-2018 15:00:00, NaN  
28-May-2018 16:00:00, NaN  
28-May-2018 17:00:00, NaN  
28-May-2018 18:00:00, NaN  
28-May-2018 19:00:00, NaN  
28-May-2018 20:00:00, NaN  
28-May-2018 21:00:00, NaN  
28-May-2018 22:00:00, NaN  
28-May-2018 23:00:00, NaN  
29-May-2018, NaN  
29-May-2018 01:00:00, NaN  
29-May-2018 02:00:00, NaN  
29-May-2018 03:00:00, NaN  
29-May-2018 04:00:00, NaN  
29-May-2018 05:00:00, NaN  
29-May-2018 06:00:00, NaN  
29-May-2018 07:00:00, NaN  
29-May-2018 08:00:00, NaN  
29-May-2018 09:00:00, NaN  
29-May-2018 10:00:00, NaN  
29-May-2018 11:00:00, NaN  
29-May-2018 12:00:00, NaN  
29-May-2018 13:00:00, NaN  
29-May-2018 14:00:00, NaN  
29-May-2018 15:00:00, NaN  
29-May-2018 16:00:00, NaN  
29-May-2018 17:00:00, NaN  
29-May-2018 18:00:00, NaN  
29-May-2018 19:00:00, NaN  
29-May-2018 20:00:00, NaN  
29-May-2018 21:00:00, NaN  
29-May-2018 22:00:00, NaN  
29-May-2018 23:00:00, NaN  
30-May-2018, NaN  
30-May-2018 01:00:00, NaN  
30-May-2018 02:00:00, NaN  
30-May-2018 03:00:00, NaN  
30-May-2018 04:00:00, NaN

30-May-2018 05:00:00, NaN  
30-May-2018 06:00:00, NaN  
30-May-2018 07:00:00, NaN  
30-May-2018 08:00:00, NaN  
30-May-2018 09:00:00, NaN  
30-May-2018 10:00:00, NaN  
30-May-2018 11:00:00, NaN  
30-May-2018 12:00:00, NaN  
30-May-2018 13:00:00, NaN  
30-May-2018 14:00:00, NaN  
30-May-2018 15:00:00, NaN  
30-May-2018 16:00:00, NaN  
30-May-2018 17:00:00, NaN  
30-May-2018 18:00:00, NaN  
30-May-2018 19:00:00, NaN  
30-May-2018 20:00:00, NaN  
30-May-2018 21:00:00, NaN  
30-May-2018 22:00:00, NaN  
30-May-2018 23:00:00, NaN  
31-May-2018, NaN  
31-May-2018 01:00:00, NaN  
31-May-2018 02:00:00, NaN  
31-May-2018 03:00:00, NaN  
31-May-2018 04:00:00, NaN  
31-May-2018 05:00:00, NaN  
31-May-2018 06:00:00, NaN  
31-May-2018 07:00:00, NaN  
31-May-2018 08:00:00, NaN  
31-May-2018 09:00:00, NaN  
31-May-2018 10:00:00, NaN  
31-May-2018 11:00:00, NaN  
31-May-2018 12:00:00, NaN  
31-May-2018 13:00:00, NaN  
31-May-2018 14:00:00, NaN  
31-May-2018 15:00:00, NaN  
31-May-2018 16:00:00, NaN  
31-May-2018 17:00:00, NaN  
31-May-2018 18:00:00, NaN  
31-May-2018 19:00:00, NaN  
31-May-2018 20:00:00, NaN  
31-May-2018 21:00:00, NaN  
31-May-2018 22:00:00, NaN  
31-May-2018 23:00:00, NaN  
01-Jun-2018, 2.01e-01  
01-Jun-2018 01:00:00, 2.01e-01  
01-Jun-2018 02:00:00, 2.01e-01  
01-Jun-2018 03:00:00, 2.01e-01  
01-Jun-2018 04:00:00, 2.01e-01  
01-Jun-2018 05:00:00, 2.01e-01  
01-Jun-2018 06:00:00, 2.01e-01  
01-Jun-2018 07:00:00, 2.01e-01  
01-Jun-2018 08:00:00, 2.01e-01  
01-Jun-2018 09:00:00, 2.01e-01  
01-Jun-2018 10:00:00, 2.01e-01  
01-Jun-2018 11:00:00, 2.00e-01  
01-Jun-2018 12:00:00, 2.00e-01  
01-Jun-2018 13:00:00, 1.99e-01  
01-Jun-2018 14:00:00, 1.99e-01  
01-Jun-2018 15:00:00, 1.98e-01  
01-Jun-2018 16:00:00, 1.98e-01  
01-Jun-2018 17:00:00, 1.98e-01  
01-Jun-2018 18:00:00, 1.97e-01  
01-Jun-2018 19:00:00, 1.97e-01  
01-Jun-2018 20:00:00, 1.98e-01

01-Jun-2018 21:00:00, 1.98e-01  
01-Jun-2018 22:00:00, 1.98e-01  
01-Jun-2018 23:00:00, 1.98e-01  
02-Jun-2018, 1.98e-01  
02-Jun-2018 01:00:00, 1.99e-01  
02-Jun-2018 02:00:00, 1.99e-01  
02-Jun-2018 03:00:00, 1.99e-01  
02-Jun-2018 04:00:00, 1.99e-01  
02-Jun-2018 05:00:00, 1.99e-01  
02-Jun-2018 06:00:00, 1.99e-01  
02-Jun-2018 07:00:00, 1.99e-01  
02-Jun-2018 08:00:00, 1.99e-01  
02-Jun-2018 09:00:00, 1.99e-01  
02-Jun-2018 10:00:00, 1.98e-01  
02-Jun-2018 11:00:00, 1.98e-01  
02-Jun-2018 12:00:00, 1.97e-01  
02-Jun-2018 13:00:00, 1.97e-01  
02-Jun-2018 14:00:00, 1.96e-01  
02-Jun-2018 15:00:00, 1.96e-01  
02-Jun-2018 16:00:00, 1.95e-01  
02-Jun-2018 17:00:00, 1.95e-01  
02-Jun-2018 18:00:00, 1.94e-01  
02-Jun-2018 19:00:00, 1.94e-01  
02-Jun-2018 20:00:00, 1.95e-01  
02-Jun-2018 21:00:00, 1.95e-01  
02-Jun-2018 22:00:00, 1.95e-01  
02-Jun-2018 23:00:00, 1.96e-01  
03-Jun-2018, 1.96e-01  
03-Jun-2018 01:00:00, 1.96e-01  
03-Jun-2018 02:00:00, 1.96e-01  
03-Jun-2018 03:00:00, 1.96e-01  
03-Jun-2018 04:00:00, 1.96e-01  
03-Jun-2018 05:00:00, 1.96e-01  
03-Jun-2018 06:00:00, 1.96e-01  
03-Jun-2018 07:00:00, 1.96e-01  
03-Jun-2018 08:00:00, 1.96e-01  
03-Jun-2018 09:00:00, 1.96e-01  
03-Jun-2018 10:00:00, 1.96e-01  
03-Jun-2018 11:00:00, 1.96e-01  
03-Jun-2018 12:00:00, 1.95e-01  
03-Jun-2018 13:00:00, 1.95e-01  
03-Jun-2018 14:00:00, 1.95e-01  
03-Jun-2018 15:00:00, 1.94e-01  
03-Jun-2018 16:00:00, 1.94e-01  
03-Jun-2018 17:00:00, 1.94e-01  
03-Jun-2018 18:00:00, 1.94e-01  
03-Jun-2018 19:00:00, 1.94e-01  
03-Jun-2018 20:00:00, 1.94e-01  
03-Jun-2018 21:00:00, 1.94e-01  
03-Jun-2018 22:00:00, 1.94e-01  
03-Jun-2018 23:00:00, 1.94e-01  
04-Jun-2018, 1.94e-01  
04-Jun-2018 01:00:00, 1.94e-01  
04-Jun-2018 02:00:00, 1.95e-01  
04-Jun-2018 03:00:00, 1.95e-01  
04-Jun-2018 04:00:00, 1.95e-01  
04-Jun-2018 05:00:00, 1.95e-01  
04-Jun-2018 06:00:00, 1.95e-01  
04-Jun-2018 07:00:00, 1.95e-01  
04-Jun-2018 08:00:00, 1.94e-01  
04-Jun-2018 09:00:00, 1.94e-01  
04-Jun-2018 10:00:00, 1.94e-01  
04-Jun-2018 11:00:00, 1.94e-01  
04-Jun-2018 12:00:00, 1.93e-01

04-Jun-2018 13:00:00, 1.93e-01  
04-Jun-2018 14:00:00, 1.93e-01  
04-Jun-2018 15:00:00, 1.92e-01  
04-Jun-2018 16:00:00, 1.92e-01  
04-Jun-2018 17:00:00, 1.91e-01  
04-Jun-2018 18:00:00, 1.91e-01  
04-Jun-2018 19:00:00, 1.91e-01  
04-Jun-2018 20:00:00, 1.91e-01  
04-Jun-2018 21:00:00, 1.92e-01  
04-Jun-2018 22:00:00, 1.92e-01  
04-Jun-2018 23:00:00, 1.92e-01  
05-Jun-2018, 1.92e-01  
05-Jun-2018 01:00:00, 1.93e-01  
05-Jun-2018 02:00:00, 1.93e-01  
05-Jun-2018 03:00:00, 1.93e-01  
05-Jun-2018 04:00:00, 1.93e-01  
05-Jun-2018 05:00:00, 1.93e-01  
05-Jun-2018 06:00:00, 1.93e-01  
05-Jun-2018 07:00:00, 1.93e-01  
05-Jun-2018 08:00:00, 1.93e-01  
05-Jun-2018 09:00:00, 1.93e-01  
05-Jun-2018 10:00:00, 1.92e-01  
05-Jun-2018 11:00:00, 1.92e-01  
05-Jun-2018 12:00:00, 1.91e-01  
05-Jun-2018 13:00:00, 1.91e-01  
05-Jun-2018 14:00:00, 1.91e-01  
05-Jun-2018 15:00:00, 1.90e-01  
05-Jun-2018 16:00:00, 1.90e-01  
05-Jun-2018 17:00:00, 1.90e-01  
05-Jun-2018 18:00:00, 1.90e-01  
05-Jun-2018 19:00:00, 1.90e-01  
05-Jun-2018 20:00:00, 1.90e-01  
05-Jun-2018 21:00:00, 1.90e-01  
05-Jun-2018 22:00:00, 1.90e-01  
05-Jun-2018 23:00:00, 1.91e-01  
06-Jun-2018, 1.91e-01  
06-Jun-2018 01:00:00, 1.91e-01  
06-Jun-2018 02:00:00, 1.91e-01  
06-Jun-2018 03:00:00, 1.91e-01  
06-Jun-2018 04:00:00, 1.91e-01  
06-Jun-2018 05:00:00, 1.91e-01  
06-Jun-2018 06:00:00, 1.91e-01  
06-Jun-2018 07:00:00, 1.91e-01  
06-Jun-2018 08:00:00, 1.91e-01  
06-Jun-2018 09:00:00, 1.91e-01  
06-Jun-2018 10:00:00, 1.91e-01  
06-Jun-2018 11:00:00, 1.90e-01  
06-Jun-2018 12:00:00, 1.90e-01  
06-Jun-2018 13:00:00, 1.90e-01  
06-Jun-2018 14:00:00, 1.89e-01  
06-Jun-2018 15:00:00, 1.89e-01  
06-Jun-2018 16:00:00, 1.89e-01  
06-Jun-2018 17:00:00, 1.89e-01  
06-Jun-2018 18:00:00, 1.89e-01  
06-Jun-2018 19:00:00, 1.89e-01  
06-Jun-2018 20:00:00, 1.89e-01  
06-Jun-2018 21:00:00, 1.89e-01  
06-Jun-2018 22:00:00, 1.89e-01  
06-Jun-2018 23:00:00, 1.90e-01  
07-Jun-2018, 1.90e-01  
07-Jun-2018 01:00:00, 1.90e-01  
07-Jun-2018 02:00:00, 1.90e-01  
07-Jun-2018 03:00:00, 1.90e-01  
07-Jun-2018 04:00:00, 1.90e-01

07-Jun-2018 05:00:00, 1.90e-01  
07-Jun-2018 06:00:00, 1.90e-01  
07-Jun-2018 07:00:00, 1.90e-01  
07-Jun-2018 08:00:00, 1.90e-01  
07-Jun-2018 09:00:00, 1.90e-01  
07-Jun-2018 10:00:00, 1.89e-01  
07-Jun-2018 11:00:00, 1.89e-01  
07-Jun-2018 12:00:00, 1.89e-01  
07-Jun-2018 13:00:00, 1.88e-01  
07-Jun-2018 14:00:00, 1.88e-01  
07-Jun-2018 15:00:00, 1.88e-01  
07-Jun-2018 16:00:00, 1.88e-01  
07-Jun-2018 17:00:00, 1.88e-01  
07-Jun-2018 18:00:00, 1.87e-01  
07-Jun-2018 19:00:00, 1.87e-01  
07-Jun-2018 20:00:00, 1.88e-01  
07-Jun-2018 21:00:00, 1.88e-01  
07-Jun-2018 22:00:00, 1.88e-01  
07-Jun-2018 23:00:00, 1.88e-01  
08-Jun-2018, 1.88e-01  
08-Jun-2018 01:00:00, 1.88e-01  
08-Jun-2018 02:00:00, 1.89e-01  
08-Jun-2018 03:00:00, 1.89e-01  
08-Jun-2018 04:00:00, 1.89e-01  
08-Jun-2018 05:00:00, 1.89e-01  
08-Jun-2018 06:00:00, 1.89e-01  
08-Jun-2018 07:00:00, 1.89e-01  
08-Jun-2018 08:00:00, 1.89e-01  
08-Jun-2018 09:00:00, 1.88e-01  
08-Jun-2018 10:00:00, 1.88e-01  
08-Jun-2018 11:00:00, 1.88e-01  
08-Jun-2018 12:00:00, 1.88e-01  
08-Jun-2018 13:00:00, 1.87e-01  
08-Jun-2018 14:00:00, 1.87e-01  
08-Jun-2018 15:00:00, 1.86e-01  
08-Jun-2018 16:00:00, 1.86e-01  
08-Jun-2018 17:00:00, 1.86e-01  
08-Jun-2018 18:00:00, 1.86e-01  
08-Jun-2018 19:00:00, 1.86e-01  
08-Jun-2018 20:00:00, 1.86e-01  
08-Jun-2018 21:00:00, 1.87e-01  
08-Jun-2018 22:00:00, 1.87e-01  
08-Jun-2018 23:00:00, 1.87e-01  
09-Jun-2018, 1.87e-01  
09-Jun-2018 01:00:00, 1.88e-01  
09-Jun-2018 02:00:00, 1.88e-01  
09-Jun-2018 03:00:00, 1.88e-01  
09-Jun-2018 04:00:00, 1.88e-01  
09-Jun-2018 05:00:00, 1.88e-01  
09-Jun-2018 06:00:00, 1.88e-01  
09-Jun-2018 07:00:00, 1.88e-01  
09-Jun-2018 08:00:00, 1.88e-01  
09-Jun-2018 09:00:00, 1.88e-01  
09-Jun-2018 10:00:00, 1.87e-01  
09-Jun-2018 11:00:00, 1.87e-01  
09-Jun-2018 12:00:00, 1.86e-01  
09-Jun-2018 13:00:00, 1.86e-01  
09-Jun-2018 14:00:00, 1.86e-01  
09-Jun-2018 15:00:00, 1.86e-01  
09-Jun-2018 16:00:00, 1.85e-01  
09-Jun-2018 17:00:00, 1.85e-01  
09-Jun-2018 18:00:00, 1.85e-01  
09-Jun-2018 19:00:00, 1.85e-01  
09-Jun-2018 20:00:00, 1.85e-01

09-Jun-2018 21:00:00, 1.86e-01  
09-Jun-2018 22:00:00, 1.86e-01  
09-Jun-2018 23:00:00, 1.86e-01  
10-Jun-2018, 1.86e-01  
10-Jun-2018 01:00:00, 1.86e-01  
10-Jun-2018 02:00:00, 1.87e-01  
10-Jun-2018 03:00:00, 1.87e-01  
10-Jun-2018 04:00:00, 1.87e-01  
10-Jun-2018 05:00:00, 1.87e-01  
10-Jun-2018 06:00:00, 1.87e-01  
10-Jun-2018 07:00:00, 1.87e-01  
10-Jun-2018 08:00:00, 1.87e-01  
10-Jun-2018 09:00:00, 1.86e-01  
10-Jun-2018 10:00:00, 1.86e-01  
10-Jun-2018 11:00:00, 1.86e-01  
10-Jun-2018 12:00:00, 1.86e-01  
10-Jun-2018 13:00:00, 1.85e-01  
10-Jun-2018 14:00:00, 1.85e-01  
10-Jun-2018 15:00:00, 1.84e-01  
10-Jun-2018 16:00:00, 1.84e-01  
10-Jun-2018 17:00:00, 1.84e-01  
10-Jun-2018 18:00:00, 1.84e-01  
10-Jun-2018 19:00:00, 1.84e-01  
10-Jun-2018 20:00:00, 1.84e-01  
10-Jun-2018 21:00:00, 1.85e-01  
10-Jun-2018 22:00:00, 1.85e-01  
10-Jun-2018 23:00:00, 1.85e-01  
11-Jun-2018, 1.85e-01  
11-Jun-2018 01:00:00, 1.86e-01  
11-Jun-2018 02:00:00, 1.86e-01  
11-Jun-2018 03:00:00, 1.86e-01  
11-Jun-2018 04:00:00, 1.86e-01  
11-Jun-2018 05:00:00, 1.86e-01  
11-Jun-2018 06:00:00, 1.86e-01  
11-Jun-2018 07:00:00, 1.86e-01  
11-Jun-2018 08:00:00, 1.86e-01  
11-Jun-2018 09:00:00, 1.86e-01  
11-Jun-2018 10:00:00, 1.85e-01  
11-Jun-2018 11:00:00, 1.85e-01  
11-Jun-2018 12:00:00, 1.84e-01  
11-Jun-2018 13:00:00, 1.84e-01  
11-Jun-2018 14:00:00, 1.84e-01  
11-Jun-2018 15:00:00, 1.84e-01  
11-Jun-2018 16:00:00, 1.84e-01  
11-Jun-2018 17:00:00, 1.83e-01  
11-Jun-2018 18:00:00, 1.83e-01  
11-Jun-2018 19:00:00, 1.84e-01  
11-Jun-2018 20:00:00, 1.84e-01  
11-Jun-2018 21:00:00, 1.84e-01  
11-Jun-2018 22:00:00, 1.84e-01  
11-Jun-2018 23:00:00, 1.84e-01  
12-Jun-2018, 1.84e-01  
12-Jun-2018 01:00:00, 1.85e-01  
12-Jun-2018 02:00:00, 1.85e-01  
12-Jun-2018 03:00:00, 1.85e-01  
12-Jun-2018 04:00:00, 1.85e-01  
12-Jun-2018 05:00:00, 1.85e-01  
12-Jun-2018 06:00:00, 1.85e-01  
12-Jun-2018 07:00:00, 1.85e-01  
12-Jun-2018 08:00:00, 1.85e-01  
12-Jun-2018 09:00:00, 1.85e-01  
12-Jun-2018 10:00:00, 1.84e-01  
12-Jun-2018 11:00:00, 1.84e-01  
12-Jun-2018 12:00:00, 1.84e-01

12-Jun-2018 13:00:00, 1.83e-01  
12-Jun-2018 14:00:00, 1.83e-01  
12-Jun-2018 15:00:00, 1.83e-01  
12-Jun-2018 16:00:00, 1.83e-01  
12-Jun-2018 17:00:00, 1.82e-01  
12-Jun-2018 18:00:00, 1.82e-01  
12-Jun-2018 19:00:00, 1.83e-01  
12-Jun-2018 20:00:00, 1.83e-01  
12-Jun-2018 21:00:00, 1.83e-01  
12-Jun-2018 22:00:00, 1.83e-01  
12-Jun-2018 23:00:00, 1.84e-01  
13-Jun-2018, 1.84e-01  
13-Jun-2018 01:00:00, 1.84e-01  
13-Jun-2018 02:00:00, 1.84e-01  
13-Jun-2018 03:00:00, 1.84e-01  
13-Jun-2018 04:00:00, 1.84e-01  
13-Jun-2018 05:00:00, 1.84e-01  
13-Jun-2018 06:00:00, 1.84e-01  
13-Jun-2018 07:00:00, 1.84e-01  
13-Jun-2018 08:00:00, 1.84e-01  
13-Jun-2018 09:00:00, 1.84e-01  
13-Jun-2018 10:00:00, 1.84e-01  
13-Jun-2018 11:00:00, 1.83e-01  
13-Jun-2018 12:00:00, 1.83e-01  
13-Jun-2018 13:00:00, 1.82e-01  
13-Jun-2018 14:00:00, 1.82e-01  
13-Jun-2018 15:00:00, 1.82e-01  
13-Jun-2018 16:00:00, 1.82e-01  
13-Jun-2018 17:00:00, 1.82e-01  
13-Jun-2018 18:00:00, 1.82e-01  
13-Jun-2018 19:00:00, 1.82e-01  
13-Jun-2018 20:00:00, 1.82e-01  
13-Jun-2018 21:00:00, 1.82e-01  
13-Jun-2018 22:00:00, 1.82e-01  
13-Jun-2018 23:00:00, 1.83e-01  
14-Jun-2018, 1.83e-01  
14-Jun-2018 01:00:00, 1.83e-01  
14-Jun-2018 02:00:00, 1.83e-01  
14-Jun-2018 03:00:00, 1.83e-01  
14-Jun-2018 04:00:00, 1.84e-01  
14-Jun-2018 05:00:00, 1.84e-01  
14-Jun-2018 06:00:00, 1.84e-01  
14-Jun-2018 07:00:00, 1.84e-01  
14-Jun-2018 08:00:00, 1.83e-01  
14-Jun-2018 09:00:00, 1.83e-01  
14-Jun-2018 10:00:00, 1.83e-01  
14-Jun-2018 11:00:00, 1.83e-01  
14-Jun-2018 12:00:00, 1.82e-01  
14-Jun-2018 13:00:00, 1.82e-01  
14-Jun-2018 14:00:00, 1.82e-01  
14-Jun-2018 15:00:00, 1.82e-01  
14-Jun-2018 16:00:00, 1.82e-01  
14-Jun-2018 17:00:00, 1.82e-01  
14-Jun-2018 18:00:00, 1.82e-01  
14-Jun-2018 19:00:00, 1.82e-01  
14-Jun-2018 20:00:00, 1.82e-01  
14-Jun-2018 21:00:00, 1.82e-01  
14-Jun-2018 22:00:00, 1.82e-01  
14-Jun-2018 23:00:00, 1.82e-01  
15-Jun-2018, 1.83e-01  
15-Jun-2018 01:00:00, 1.83e-01  
15-Jun-2018 02:00:00, 1.83e-01  
15-Jun-2018 03:00:00, 1.83e-01  
15-Jun-2018 04:00:00, 1.83e-01



15-Jun-2018 05:00:00, 1.83e-01  
15-Jun-2018 06:00:00, 1.83e-01  
15-Jun-2018 07:00:00, 1.83e-01  
15-Jun-2018 08:00:00, 1.83e-01  
15-Jun-2018 09:00:00, 1.83e-01  
15-Jun-2018 10:00:00, 1.82e-01  
15-Jun-2018 11:00:00, 1.82e-01  
15-Jun-2018 12:00:00, 1.82e-01  
15-Jun-2018 13:00:00, 1.82e-01  
15-Jun-2018 14:00:00, 1.81e-01  
15-Jun-2018 15:00:00, 1.81e-01  
15-Jun-2018 16:00:00, 1.81e-01  
15-Jun-2018 17:00:00, 1.81e-01  
15-Jun-2018 18:00:00, 1.81e-01  
15-Jun-2018 19:00:00, 1.81e-01  
15-Jun-2018 20:00:00, 1.81e-01  
15-Jun-2018 21:00:00, 1.81e-01  
15-Jun-2018 22:00:00, 1.82e-01  
15-Jun-2018 23:00:00, 1.82e-01  
16-Jun-2018, 1.82e-01  
16-Jun-2018 01:00:00, 1.82e-01  
16-Jun-2018 02:00:00, 1.82e-01  
16-Jun-2018 03:00:00, 1.82e-01  
16-Jun-2018 04:00:00, 1.82e-01  
16-Jun-2018 05:00:00, 1.82e-01  
16-Jun-2018 06:00:00, 1.82e-01  
16-Jun-2018 07:00:00, 1.82e-01  
16-Jun-2018 08:00:00, 1.82e-01  
16-Jun-2018 09:00:00, 1.82e-01  
16-Jun-2018 10:00:00, 1.82e-01  
16-Jun-2018 11:00:00, 1.82e-01  
16-Jun-2018 12:00:00, 1.81e-01  
16-Jun-2018 13:00:00, 1.81e-01  
16-Jun-2018 14:00:00, 1.81e-01  
16-Jun-2018 15:00:00, 1.81e-01  
16-Jun-2018 16:00:00, 1.81e-01  
16-Jun-2018 17:00:00, 1.81e-01  
16-Jun-2018 18:00:00, 1.81e-01  
16-Jun-2018 19:00:00, 1.81e-01  
16-Jun-2018 20:00:00, 1.81e-01  
16-Jun-2018 21:00:00, 1.81e-01  
16-Jun-2018 22:00:00, 1.81e-01  
16-Jun-2018 23:00:00, 1.81e-01  
17-Jun-2018, 1.81e-01  
17-Jun-2018 01:00:00, 1.81e-01  
17-Jun-2018 02:00:00, 1.81e-01  
17-Jun-2018 03:00:00, 1.81e-01  
17-Jun-2018 04:00:00, 1.81e-01  
17-Jun-2018 05:00:00, 1.81e-01  
17-Jun-2018 06:00:00, 1.79e-01  
17-Jun-2018 07:00:00, 1.79e-01  
17-Jun-2018 08:00:00, 1.79e-01  
17-Jun-2018 09:00:00, 1.79e-01  
17-Jun-2018 10:00:00, 1.79e-01  
17-Jun-2018 11:00:00, 1.79e-01  
17-Jun-2018 12:00:00, 1.80e-01  
17-Jun-2018 13:00:00, 1.80e-01  
17-Jun-2018 14:00:00, 1.80e-01  
17-Jun-2018 15:00:00, 1.80e-01  
17-Jun-2018 16:00:00, 1.80e-01  
17-Jun-2018 17:00:00, 1.80e-01  
17-Jun-2018 18:00:00, 1.80e-01  
17-Jun-2018 19:00:00, 1.80e-01  
17-Jun-2018 20:00:00, 1.80e-01

17-Jun-2018 21:00:00, 1.80e-01  
17-Jun-2018 22:00:00, 1.80e-01  
17-Jun-2018 23:00:00, 1.80e-01  
18-Jun-2018, 1.80e-01  
18-Jun-2018 01:00:00, 1.80e-01  
18-Jun-2018 02:00:00, 1.80e-01  
18-Jun-2018 03:00:00, 1.80e-01  
18-Jun-2018 04:00:00, 1.80e-01  
18-Jun-2018 05:00:00, 1.80e-01  
18-Jun-2018 06:00:00, 1.80e-01  
18-Jun-2018 07:00:00, 1.80e-01  
18-Jun-2018 08:00:00, 1.80e-01  
18-Jun-2018 09:00:00, 1.80e-01  
18-Jun-2018 10:00:00, 1.80e-01  
18-Jun-2018 11:00:00, 1.80e-01  
18-Jun-2018 12:00:00, 1.80e-01  
18-Jun-2018 13:00:00, 1.80e-01  
18-Jun-2018 14:00:00, 1.80e-01  
18-Jun-2018 15:00:00, 1.80e-01  
18-Jun-2018 16:00:00, 1.80e-01  
18-Jun-2018 17:00:00, 1.80e-01  
18-Jun-2018 18:00:00, 1.80e-01  
18-Jun-2018 19:00:00, 1.80e-01  
18-Jun-2018 20:00:00, 1.80e-01  
18-Jun-2018 21:00:00, 1.80e-01  
18-Jun-2018 22:00:00, 1.80e-01  
18-Jun-2018 23:00:00, 1.81e-01  
19-Jun-2018, 1.81e-01  
19-Jun-2018 01:00:00, 1.81e-01  
19-Jun-2018 02:00:00, 1.81e-01  
19-Jun-2018 03:00:00, 1.81e-01  
19-Jun-2018 04:00:00, 1.81e-01  
19-Jun-2018 05:00:00, 1.81e-01  
19-Jun-2018 06:00:00, 1.81e-01  
19-Jun-2018 07:00:00, 1.81e-01  
19-Jun-2018 08:00:00, 1.81e-01  
19-Jun-2018 09:00:00, 1.81e-01  
19-Jun-2018 10:00:00, 1.81e-01  
19-Jun-2018 11:00:00, 1.80e-01  
19-Jun-2018 12:00:00, 1.80e-01  
19-Jun-2018 13:00:00, 1.80e-01  
19-Jun-2018 14:00:00, 1.80e-01  
19-Jun-2018 15:00:00, 1.80e-01  
19-Jun-2018 16:00:00, 1.80e-01  
19-Jun-2018 17:00:00, 1.80e-01  
19-Jun-2018 18:00:00, 1.80e-01  
19-Jun-2018 19:00:00, 1.80e-01  
19-Jun-2018 20:00:00, 1.80e-01  
19-Jun-2018 21:00:00, 1.80e-01  
19-Jun-2018 22:00:00, 1.80e-01  
19-Jun-2018 23:00:00, 1.81e-01  
20-Jun-2018, 1.81e-01  
20-Jun-2018 01:00:00, 1.81e-01  
20-Jun-2018 02:00:00, 1.81e-01  
20-Jun-2018 03:00:00, 1.81e-01  
20-Jun-2018 04:00:00, 1.81e-01  
20-Jun-2018 05:00:00, 1.81e-01  
20-Jun-2018 06:00:00, 1.81e-01  
20-Jun-2018 07:00:00, 1.81e-01  
20-Jun-2018 08:00:00, 1.81e-01  
20-Jun-2018 09:00:00, 1.81e-01  
20-Jun-2018 10:00:00, 1.81e-01  
20-Jun-2018 11:00:00, 1.80e-01  
20-Jun-2018 12:00:00, 1.80e-01

20-Jun-2018 13:00:00, 1.80e-01  
20-Jun-2018 14:00:00, 1.80e-01  
20-Jun-2018 15:00:00, 1.80e-01  
20-Jun-2018 16:00:00, 1.80e-01  
20-Jun-2018 17:00:00, 1.79e-01  
20-Jun-2018 18:00:00, 1.80e-01  
20-Jun-2018 19:00:00, 1.80e-01  
20-Jun-2018 20:00:00, 1.80e-01  
20-Jun-2018 21:00:00, 1.80e-01  
20-Jun-2018 22:00:00, 1.80e-01  
20-Jun-2018 23:00:00, 1.81e-01  
21-Jun-2018, 1.81e-01  
21-Jun-2018 01:00:00, 1.81e-01  
21-Jun-2018 02:00:00, 1.81e-01  
21-Jun-2018 03:00:00, 1.81e-01  
21-Jun-2018 04:00:00, 1.81e-01  
21-Jun-2018 05:00:00, 1.81e-01  
21-Jun-2018 06:00:00, 1.81e-01  
21-Jun-2018 07:00:00, 1.81e-01  
21-Jun-2018 08:00:00, 1.81e-01  
21-Jun-2018 09:00:00, 1.81e-01  
21-Jun-2018 10:00:00, 1.81e-01  
21-Jun-2018 11:00:00, 1.80e-01  
21-Jun-2018 12:00:00, 1.80e-01  
21-Jun-2018 13:00:00, 1.80e-01  
21-Jun-2018 14:00:00, 1.80e-01  
21-Jun-2018 15:00:00, 1.80e-01  
21-Jun-2018 16:00:00, 1.80e-01  
21-Jun-2018 17:00:00, 1.80e-01  
21-Jun-2018 18:00:00, 1.79e-01  
21-Jun-2018 19:00:00, 1.80e-01  
21-Jun-2018 20:00:00, 1.80e-01  
21-Jun-2018 21:00:00, 1.80e-01  
21-Jun-2018 22:00:00, 1.80e-01  
21-Jun-2018 23:00:00, 1.81e-01  
22-Jun-2018, 1.81e-01  
22-Jun-2018 01:00:00, 1.81e-01  
22-Jun-2018 02:00:00, 1.81e-01  
22-Jun-2018 03:00:00, 1.81e-01  
22-Jun-2018 04:00:00, 1.81e-01  
22-Jun-2018 05:00:00, 1.81e-01  
22-Jun-2018 06:00:00, 1.81e-01  
22-Jun-2018 07:00:00, 1.81e-01  
22-Jun-2018 08:00:00, 1.81e-01  
22-Jun-2018 09:00:00, 1.81e-01  
22-Jun-2018 10:00:00, 1.81e-01  
22-Jun-2018 11:00:00, 1.81e-01  
22-Jun-2018 12:00:00, 1.80e-01  
22-Jun-2018 13:00:00, 1.80e-01  
22-Jun-2018 14:00:00, 1.80e-01  
22-Jun-2018 15:00:00, 1.80e-01  
22-Jun-2018 16:00:00, 1.80e-01  
22-Jun-2018 17:00:00, 1.80e-01  
22-Jun-2018 18:00:00, 1.80e-01  
22-Jun-2018 19:00:00, 1.80e-01  
22-Jun-2018 20:00:00, 1.80e-01  
22-Jun-2018 21:00:00, 1.80e-01  
22-Jun-2018 22:00:00, 1.80e-01  
22-Jun-2018 23:00:00, 1.80e-01  
23-Jun-2018, 1.81e-01  
23-Jun-2018 01:00:00, 1.81e-01  
23-Jun-2018 02:00:00, 1.81e-01  
23-Jun-2018 03:00:00, 1.81e-01  
23-Jun-2018 04:00:00, 1.81e-01

23-Jun-2018 05:00:00, 1.81e-01  
23-Jun-2018 06:00:00, 1.81e-01  
23-Jun-2018 07:00:00, 1.81e-01  
23-Jun-2018 08:00:00, 1.81e-01  
23-Jun-2018 09:00:00, 1.80e-01  
23-Jun-2018 10:00:00, 1.80e-01  
23-Jun-2018 11:00:00, 1.80e-01  
23-Jun-2018 12:00:00, 1.80e-01  
23-Jun-2018 13:00:00, 1.79e-01  
23-Jun-2018 14:00:00, 1.79e-01  
23-Jun-2018 15:00:00, 1.79e-01  
23-Jun-2018 16:00:00, 1.79e-01  
23-Jun-2018 17:00:00, 1.79e-01  
23-Jun-2018 18:00:00, 1.79e-01  
23-Jun-2018 19:00:00, 1.79e-01  
23-Jun-2018 20:00:00, 1.79e-01  
23-Jun-2018 21:00:00, 1.79e-01  
23-Jun-2018 22:00:00, 1.80e-01  
23-Jun-2018 23:00:00, 1.80e-01  
24-Jun-2018, 1.80e-01  
24-Jun-2018 01:00:00, 1.80e-01  
24-Jun-2018 02:00:00, 1.80e-01  
24-Jun-2018 03:00:00, 1.80e-01  
24-Jun-2018 04:00:00, 1.80e-01  
24-Jun-2018 05:00:00, 1.80e-01  
24-Jun-2018 06:00:00, 1.80e-01  
24-Jun-2018 07:00:00, 1.80e-01  
24-Jun-2018 08:00:00, 1.80e-01  
24-Jun-2018 09:00:00, 1.80e-01  
24-Jun-2018 10:00:00, 1.80e-01  
24-Jun-2018 11:00:00, 1.80e-01  
24-Jun-2018 12:00:00, 1.80e-01  
24-Jun-2018 13:00:00, 1.79e-01  
24-Jun-2018 14:00:00, 1.79e-01  
24-Jun-2018 15:00:00, 1.79e-01  
24-Jun-2018 16:00:00, 1.79e-01  
24-Jun-2018 17:00:00, 1.79e-01  
24-Jun-2018 18:00:00, 1.79e-01  
24-Jun-2018 19:00:00, 1.79e-01  
24-Jun-2018 20:00:00, 1.79e-01  
24-Jun-2018 21:00:00, 1.79e-01  
24-Jun-2018 22:00:00, 1.80e-01  
24-Jun-2018 23:00:00, 1.80e-01  
25-Jun-2018, 1.80e-01  
25-Jun-2018 01:00:00, 1.80e-01  
25-Jun-2018 02:00:00, 1.80e-01  
25-Jun-2018 03:00:00, 1.80e-01  
25-Jun-2018 04:00:00, 1.80e-01  
25-Jun-2018 05:00:00, 1.80e-01  
25-Jun-2018 06:00:00, 1.80e-01  
25-Jun-2018 07:00:00, 1.80e-01  
25-Jun-2018 08:00:00, 1.80e-01  
25-Jun-2018 09:00:00, 1.80e-01  
25-Jun-2018 10:00:00, 1.80e-01  
25-Jun-2018 11:00:00, 1.79e-01  
25-Jun-2018 12:00:00, 1.79e-01  
25-Jun-2018 13:00:00, 1.79e-01  
25-Jun-2018 14:00:00, 1.79e-01  
25-Jun-2018 15:00:00, 1.78e-01  
25-Jun-2018 16:00:00, 1.78e-01  
25-Jun-2018 17:00:00, 1.78e-01  
25-Jun-2018 18:00:00, 1.78e-01  
25-Jun-2018 19:00:00, 1.78e-01  
25-Jun-2018 20:00:00, 1.79e-01

25-Jun-2018 21:00:00, 1.79e-01  
25-Jun-2018 22:00:00, 1.79e-01  
25-Jun-2018 23:00:00, 1.79e-01  
26-Jun-2018, 1.80e-01  
26-Jun-2018 01:00:00, 1.80e-01  
26-Jun-2018 02:00:00, 1.80e-01  
26-Jun-2018 03:00:00, 1.80e-01  
26-Jun-2018 04:00:00, 1.80e-01  
26-Jun-2018 05:00:00, 1.80e-01  
26-Jun-2018 06:00:00, 1.80e-01  
26-Jun-2018 07:00:00, 1.80e-01  
26-Jun-2018 08:00:00, 1.80e-01  
26-Jun-2018 09:00:00, 1.80e-01  
26-Jun-2018 10:00:00, 1.79e-01  
26-Jun-2018 11:00:00, 1.79e-01  
26-Jun-2018 12:00:00, 1.79e-01  
26-Jun-2018 13:00:00, 1.79e-01  
26-Jun-2018 14:00:00, 1.78e-01  
26-Jun-2018 15:00:00, 1.78e-01  
26-Jun-2018 16:00:00, 1.78e-01  
26-Jun-2018 17:00:00, 1.78e-01  
26-Jun-2018 18:00:00, 1.78e-01  
26-Jun-2018 19:00:00, 1.78e-01  
26-Jun-2018 20:00:00, 1.78e-01  
26-Jun-2018 21:00:00, 1.79e-01  
26-Jun-2018 22:00:00, 1.79e-01  
26-Jun-2018 23:00:00, 1.79e-01  
27-Jun-2018, 1.80e-01  
27-Jun-2018 01:00:00, 1.80e-01  
27-Jun-2018 02:00:00, 1.80e-01  
27-Jun-2018 03:00:00, 1.80e-01  
27-Jun-2018 04:00:00, 1.80e-01  
27-Jun-2018 05:00:00, 1.80e-01  
27-Jun-2018 06:00:00, 1.80e-01  
27-Jun-2018 07:00:00, 1.80e-01  
27-Jun-2018 08:00:00, 1.80e-01  
27-Jun-2018 09:00:00, 1.80e-01  
27-Jun-2018 10:00:00, 1.79e-01  
27-Jun-2018 11:00:00, 1.79e-01  
27-Jun-2018 12:00:00, 1.79e-01  
27-Jun-2018 13:00:00, 1.78e-01  
27-Jun-2018 14:00:00, 1.78e-01  
27-Jun-2018 15:00:00, 1.78e-01  
27-Jun-2018 16:00:00, 1.78e-01  
27-Jun-2018 17:00:00, 1.78e-01  
27-Jun-2018 18:00:00, 1.78e-01  
27-Jun-2018 19:00:00, 1.78e-01  
27-Jun-2018 20:00:00, 1.78e-01  
27-Jun-2018 21:00:00, 1.78e-01  
27-Jun-2018 22:00:00, 1.79e-01  
27-Jun-2018 23:00:00, 1.79e-01  
28-Jun-2018, 1.79e-01  
28-Jun-2018 01:00:00, 1.79e-01  
28-Jun-2018 02:00:00, 1.80e-01  
28-Jun-2018 03:00:00, 1.80e-01  
28-Jun-2018 04:00:00, 1.80e-01  
28-Jun-2018 05:00:00, 1.80e-01  
28-Jun-2018 06:00:00, 1.80e-01  
28-Jun-2018 07:00:00, 1.80e-01  
28-Jun-2018 08:00:00, 1.80e-01  
28-Jun-2018 09:00:00, 1.79e-01  
28-Jun-2018 10:00:00, 1.79e-01  
28-Jun-2018 11:00:00, 1.79e-01  
28-Jun-2018 12:00:00, 1.78e-01

28-Jun-2018 13:00:00, 1.78e-01  
28-Jun-2018 14:00:00, 1.78e-01  
28-Jun-2018 15:00:00, 1.78e-01  
28-Jun-2018 16:00:00, 1.78e-01  
28-Jun-2018 17:00:00, 1.78e-01  
28-Jun-2018 18:00:00, 1.78e-01  
28-Jun-2018 19:00:00, 1.78e-01  
28-Jun-2018 20:00:00, 1.78e-01  
28-Jun-2018 21:00:00, 1.78e-01  
28-Jun-2018 22:00:00, 1.78e-01  
28-Jun-2018 23:00:00, 1.79e-01  
29-Jun-2018, 1.79e-01  
29-Jun-2018 01:00:00, 1.79e-01  
29-Jun-2018 02:00:00, 1.79e-01  
29-Jun-2018 03:00:00, 1.79e-01  
29-Jun-2018 04:00:00, 1.79e-01  
29-Jun-2018 05:00:00, 1.79e-01  
29-Jun-2018 06:00:00, 1.79e-01  
29-Jun-2018 07:00:00, 1.79e-01  
29-Jun-2018 08:00:00, 1.79e-01  
29-Jun-2018 09:00:00, 1.79e-01  
29-Jun-2018 10:00:00, 1.79e-01  
29-Jun-2018 11:00:00, 1.78e-01  
29-Jun-2018 12:00:00, 1.78e-01  
29-Jun-2018 13:00:00, 1.78e-01  
29-Jun-2018 14:00:00, 1.77e-01  
29-Jun-2018 15:00:00, 1.77e-01  
29-Jun-2018 16:00:00, 1.77e-01  
29-Jun-2018 17:00:00, 1.77e-01  
29-Jun-2018 18:00:00, 1.77e-01  
29-Jun-2018 19:00:00, 1.77e-01  
29-Jun-2018 20:00:00, 1.77e-01  
29-Jun-2018 21:00:00, 1.78e-01  
29-Jun-2018 22:00:00, 1.78e-01  
29-Jun-2018 23:00:00, 1.78e-01  
30-Jun-2018, 1.78e-01  
30-Jun-2018 01:00:00, 1.79e-01  
30-Jun-2018 02:00:00, 1.79e-01  
30-Jun-2018 03:00:00, 1.79e-01  
30-Jun-2018 04:00:00, 1.79e-01  
30-Jun-2018 05:00:00, 1.79e-01  
30-Jun-2018 06:00:00, 1.79e-01  
30-Jun-2018 07:00:00, 1.79e-01  
30-Jun-2018 08:00:00, 1.79e-01  
30-Jun-2018 09:00:00, 1.78e-01  
30-Jun-2018 10:00:00, 1.78e-01  
30-Jun-2018 11:00:00, 1.78e-01  
30-Jun-2018 12:00:00, 1.77e-01  
30-Jun-2018 13:00:00, 1.77e-01  
30-Jun-2018 14:00:00, 1.77e-01  
30-Jun-2018 15:00:00, 1.77e-01  
30-Jun-2018 16:00:00, 1.77e-01  
30-Jun-2018 17:00:00, 1.76e-01  
30-Jun-2018 18:00:00, 1.76e-01  
30-Jun-2018 19:00:00, 1.77e-01  
30-Jun-2018 20:00:00, 1.77e-01  
30-Jun-2018 21:00:00, 1.77e-01  
30-Jun-2018 22:00:00, 1.77e-01  
30-Jun-2018 23:00:00, 1.77e-01  
01-Jul-2018, 1.78e-01  
01-Jul-2018 01:00:00, 1.78e-01  
01-Jul-2018 02:00:00, 1.78e-01  
01-Jul-2018 03:00:00, 1.78e-01  
01-Jul-2018 04:00:00, 1.78e-01

01-Jul-2018 05:00:00, 1.78e-01  
01-Jul-2018 06:00:00, 1.78e-01  
01-Jul-2018 07:00:00, 1.78e-01  
01-Jul-2018 08:00:00, 1.78e-01  
01-Jul-2018 09:00:00, 1.78e-01  
01-Jul-2018 10:00:00, 1.77e-01  
01-Jul-2018 11:00:00, 1.77e-01  
01-Jul-2018 12:00:00, 1.77e-01  
01-Jul-2018 13:00:00, 1.76e-01  
01-Jul-2018 14:00:00, 1.76e-01  
01-Jul-2018 15:00:00, 1.76e-01  
01-Jul-2018 16:00:00, 1.76e-01  
01-Jul-2018 17:00:00, 1.76e-01  
01-Jul-2018 18:00:00, 1.76e-01  
01-Jul-2018 19:00:00, 1.76e-01  
01-Jul-2018 20:00:00, 1.76e-01  
01-Jul-2018 21:00:00, 1.76e-01  
01-Jul-2018 22:00:00, 1.77e-01  
01-Jul-2018 23:00:00, 1.77e-01  
02-Jul-2018, 1.77e-01  
02-Jul-2018 01:00:00, 1.77e-01  
02-Jul-2018 02:00:00, 1.77e-01  
02-Jul-2018 03:00:00, 1.78e-01  
02-Jul-2018 04:00:00, 1.78e-01  
02-Jul-2018 05:00:00, 1.78e-01  
02-Jul-2018 06:00:00, 1.78e-01  
02-Jul-2018 07:00:00, 1.78e-01  
02-Jul-2018 08:00:00, 1.78e-01  
02-Jul-2018 09:00:00, 1.77e-01  
02-Jul-2018 10:00:00, 1.77e-01  
02-Jul-2018 11:00:00, 1.76e-01  
02-Jul-2018 12:00:00, 1.76e-01  
02-Jul-2018 13:00:00, 1.76e-01  
02-Jul-2018 14:00:00, 1.76e-01  
02-Jul-2018 15:00:00, 1.75e-01  
02-Jul-2018 16:00:00, 1.75e-01  
02-Jul-2018 17:00:00, 1.75e-01  
02-Jul-2018 18:00:00, 1.75e-01  
02-Jul-2018 19:00:00, 1.75e-01  
02-Jul-2018 20:00:00, 1.75e-01  
02-Jul-2018 21:00:00, 1.76e-01  
02-Jul-2018 22:00:00, 1.76e-01  
02-Jul-2018 23:00:00, 1.76e-01  
03-Jul-2018, 1.76e-01  
03-Jul-2018 01:00:00, 1.77e-01  
03-Jul-2018 02:00:00, 1.77e-01  
03-Jul-2018 03:00:00, 1.77e-01  
03-Jul-2018 04:00:00, 1.77e-01  
03-Jul-2018 05:00:00, 1.77e-01  
03-Jul-2018 06:00:00, 1.77e-01  
03-Jul-2018 07:00:00, 1.77e-01  
03-Jul-2018 08:00:00, 1.77e-01  
03-Jul-2018 09:00:00, 1.77e-01  
03-Jul-2018 10:00:00, 1.76e-01  
03-Jul-2018 11:00:00, 1.76e-01  
03-Jul-2018 12:00:00, 1.76e-01  
03-Jul-2018 13:00:00, 1.75e-01  
03-Jul-2018 14:00:00, 1.75e-01  
03-Jul-2018 15:00:00, 1.75e-01  
03-Jul-2018 16:00:00, 1.75e-01  
03-Jul-2018 17:00:00, 1.75e-01  
03-Jul-2018 18:00:00, 1.75e-01  
03-Jul-2018 19:00:00, 1.75e-01  
03-Jul-2018 20:00:00, 1.75e-01

03-Jul-2018 21:00:00, 1.76e-01  
03-Jul-2018 22:00:00, 1.76e-01  
03-Jul-2018 23:00:00, 1.76e-01  
04-Jul-2018, 1.76e-01  
04-Jul-2018 01:00:00, 1.76e-01  
04-Jul-2018 02:00:00, 1.76e-01  
04-Jul-2018 03:00:00, 1.76e-01  
04-Jul-2018 04:00:00, 1.76e-01  
04-Jul-2018 05:00:00, 1.76e-01  
04-Jul-2018 06:00:00, 1.76e-01  
04-Jul-2018 07:00:00, 1.76e-01  
04-Jul-2018 08:00:00, 1.76e-01  
04-Jul-2018 09:00:00, 1.76e-01  
04-Jul-2018 10:00:00, 1.76e-01  
04-Jul-2018 11:00:00, 1.75e-01  
04-Jul-2018 12:00:00, 1.75e-01  
04-Jul-2018 13:00:00, 1.75e-01  
04-Jul-2018 14:00:00, 1.75e-01  
04-Jul-2018 15:00:00, 1.74e-01  
04-Jul-2018 16:00:00, 1.74e-01  
04-Jul-2018 17:00:00, 1.74e-01  
04-Jul-2018 18:00:00, 1.74e-01  
04-Jul-2018 19:00:00, 1.74e-01  
04-Jul-2018 20:00:00, 1.75e-01  
04-Jul-2018 21:00:00, 1.75e-01  
04-Jul-2018 22:00:00, 1.75e-01  
04-Jul-2018 23:00:00, 1.75e-01  
05-Jul-2018, 1.75e-01  
05-Jul-2018 01:00:00, 1.76e-01  
05-Jul-2018 02:00:00, 1.76e-01  
05-Jul-2018 03:00:00, 1.76e-01  
05-Jul-2018 04:00:00, 1.76e-01  
05-Jul-2018 05:00:00, 1.76e-01  
05-Jul-2018 06:00:00, 1.76e-01  
05-Jul-2018 07:00:00, 1.76e-01  
05-Jul-2018 08:00:00, 1.76e-01  
05-Jul-2018 09:00:00, 1.76e-01  
05-Jul-2018 10:00:00, 1.75e-01  
05-Jul-2018 11:00:00, 1.75e-01  
05-Jul-2018 12:00:00, 1.75e-01  
05-Jul-2018 13:00:00, 1.74e-01  
05-Jul-2018 14:00:00, 1.74e-01  
05-Jul-2018 15:00:00, 1.74e-01  
05-Jul-2018 16:00:00, 1.74e-01  
05-Jul-2018 17:00:00, 1.74e-01  
05-Jul-2018 18:00:00, 1.74e-01  
05-Jul-2018 19:00:00, 1.74e-01  
05-Jul-2018 20:00:00, 1.74e-01  
05-Jul-2018 21:00:00, 1.74e-01  
05-Jul-2018 22:00:00, 1.75e-01  
05-Jul-2018 23:00:00, 1.75e-01  
06-Jul-2018, 1.75e-01  
06-Jul-2018 01:00:00, 1.75e-01  
06-Jul-2018 02:00:00, 1.75e-01  
06-Jul-2018 03:00:00, 1.75e-01  
06-Jul-2018 04:00:00, 1.75e-01  
06-Jul-2018 05:00:00, 1.75e-01  
06-Jul-2018 06:00:00, 1.75e-01  
06-Jul-2018 07:00:00, 1.75e-01  
06-Jul-2018 08:00:00, 1.75e-01  
06-Jul-2018 09:00:00, 1.75e-01  
06-Jul-2018 10:00:00, 1.75e-01  
06-Jul-2018 11:00:00, 1.74e-01  
06-Jul-2018 12:00:00, 1.74e-01



06-Jul-2018 13:00:00, 1.74e-01  
06-Jul-2018 14:00:00, 1.74e-01  
06-Jul-2018 15:00:00, 1.73e-01  
06-Jul-2018 16:00:00, 1.73e-01  
06-Jul-2018 17:00:00, 1.73e-01  
06-Jul-2018 18:00:00, 1.73e-01  
06-Jul-2018 19:00:00, 1.74e-01  
06-Jul-2018 20:00:00, 1.74e-01  
06-Jul-2018 21:00:00, 1.74e-01  
06-Jul-2018 22:00:00, 1.74e-01  
06-Jul-2018 23:00:00, 1.74e-01  
07-Jul-2018, 1.75e-01  
07-Jul-2018 01:00:00, 1.75e-01  
07-Jul-2018 02:00:00, 1.75e-01  
07-Jul-2018 03:00:00, 1.75e-01  
07-Jul-2018 04:00:00, 1.75e-01  
07-Jul-2018 05:00:00, 1.75e-01  
07-Jul-2018 06:00:00, 1.75e-01  
07-Jul-2018 07:00:00, 1.75e-01  
07-Jul-2018 08:00:00, 1.75e-01  
07-Jul-2018 09:00:00, 1.75e-01  
07-Jul-2018 10:00:00, 1.75e-01  
07-Jul-2018 11:00:00, 1.74e-01  
07-Jul-2018 12:00:00, 1.74e-01  
07-Jul-2018 13:00:00, 1.74e-01  
07-Jul-2018 14:00:00, 1.74e-01  
07-Jul-2018 15:00:00, 1.74e-01  
07-Jul-2018 16:00:00, 1.73e-01  
07-Jul-2018 17:00:00, 1.74e-01  
07-Jul-2018 18:00:00, 1.74e-01  
07-Jul-2018 19:00:00, 1.74e-01  
07-Jul-2018 20:00:00, 1.74e-01  
07-Jul-2018 21:00:00, 1.74e-01  
07-Jul-2018 22:00:00, 1.74e-01  
07-Jul-2018 23:00:00, 1.74e-01  
08-Jul-2018, 1.74e-01  
08-Jul-2018 01:00:00, 1.74e-01  
08-Jul-2018 02:00:00, 1.74e-01  
08-Jul-2018 03:00:00, 1.74e-01  
08-Jul-2018 04:00:00, 1.74e-01  
08-Jul-2018 05:00:00, 1.74e-01  
08-Jul-2018 06:00:00, 1.74e-01  
08-Jul-2018 07:00:00, 1.74e-01  
08-Jul-2018 08:00:00, 1.74e-01  
08-Jul-2018 09:00:00, 1.74e-01  
08-Jul-2018 10:00:00, 1.74e-01  
08-Jul-2018 11:00:00, 1.73e-01  
08-Jul-2018 12:00:00, 1.73e-01  
08-Jul-2018 13:00:00, 1.73e-01  
08-Jul-2018 14:00:00, 1.73e-01  
08-Jul-2018 15:00:00, 1.72e-01  
08-Jul-2018 16:00:00, 1.71e-01  
08-Jul-2018 17:00:00, 1.71e-01  
08-Jul-2018 18:00:00, 1.71e-01  
08-Jul-2018 19:00:00, 1.72e-01  
08-Jul-2018 20:00:00, 1.72e-01  
08-Jul-2018 21:00:00, 1.72e-01  
08-Jul-2018 22:00:00, 1.72e-01  
08-Jul-2018 23:00:00, 1.72e-01  
09-Jul-2018, 1.72e-01  
09-Jul-2018 01:00:00, 1.72e-01  
09-Jul-2018 02:00:00, 1.72e-01  
09-Jul-2018 03:00:00, 1.72e-01  
09-Jul-2018 04:00:00, 1.72e-01

09-Jul-2018 05:00:00, 1.72e-01  
09-Jul-2018 06:00:00, 1.72e-01  
09-Jul-2018 07:00:00, 1.72e-01  
09-Jul-2018 08:00:00, 1.72e-01  
09-Jul-2018 09:00:00, 1.72e-01  
09-Jul-2018 10:00:00, 1.72e-01  
09-Jul-2018 11:00:00, 1.72e-01  
09-Jul-2018 12:00:00, 1.72e-01  
09-Jul-2018 13:00:00, 1.72e-01  
09-Jul-2018 14:00:00, 1.72e-01  
09-Jul-2018 15:00:00, 1.72e-01  
09-Jul-2018 16:00:00, 1.72e-01  
09-Jul-2018 17:00:00, 1.72e-01  
09-Jul-2018 18:00:00, 1.72e-01  
09-Jul-2018 19:00:00, 1.72e-01  
09-Jul-2018 20:00:00, 1.72e-01  
09-Jul-2018 21:00:00, 1.73e-01  
09-Jul-2018 22:00:00, 1.73e-01  
09-Jul-2018 23:00:00, 1.73e-01  
10-Jul-2018, 1.73e-01  
10-Jul-2018 01:00:00, 1.74e-01  
10-Jul-2018 02:00:00, 1.74e-01  
10-Jul-2018 03:00:00, 1.74e-01  
10-Jul-2018 04:00:00, 1.74e-01  
10-Jul-2018 05:00:00, 1.74e-01  
10-Jul-2018 06:00:00, 1.74e-01  
10-Jul-2018 07:00:00, 1.74e-01  
10-Jul-2018 08:00:00, 1.74e-01  
10-Jul-2018 09:00:00, 1.74e-01  
10-Jul-2018 10:00:00, 1.74e-01  
10-Jul-2018 11:00:00, 1.74e-01  
10-Jul-2018 12:00:00, 1.74e-01  
10-Jul-2018 13:00:00, 1.74e-01  
10-Jul-2018 14:00:00, 1.74e-01  
10-Jul-2018 15:00:00, 1.74e-01  
10-Jul-2018 16:00:00, 1.74e-01  
10-Jul-2018 17:00:00, 1.74e-01  
10-Jul-2018 18:00:00, 1.74e-01  
10-Jul-2018 19:00:00, 1.74e-01  
10-Jul-2018 20:00:00, 1.74e-01  
10-Jul-2018 21:00:00, 1.74e-01  
10-Jul-2018 22:00:00, 1.74e-01  
10-Jul-2018 23:00:00, 1.74e-01  
11-Jul-2018, 1.75e-01  
11-Jul-2018 01:00:00, 1.75e-01  
11-Jul-2018 02:00:00, 1.75e-01  
11-Jul-2018 03:00:00, 1.75e-01  
11-Jul-2018 04:00:00, 1.75e-01  
11-Jul-2018 05:00:00, 1.75e-01  
11-Jul-2018 06:00:00, 1.75e-01  
11-Jul-2018 07:00:00, 1.75e-01  
11-Jul-2018 08:00:00, 1.75e-01  
11-Jul-2018 09:00:00, 1.75e-01  
11-Jul-2018 10:00:00, 1.74e-01  
11-Jul-2018 11:00:00, 1.74e-01  
11-Jul-2018 12:00:00, 1.74e-01  
11-Jul-2018 13:00:00, 1.74e-01  
11-Jul-2018 14:00:00, 1.74e-01  
11-Jul-2018 15:00:00, 1.74e-01  
11-Jul-2018 16:00:00, 1.74e-01  
11-Jul-2018 17:00:00, 1.74e-01  
11-Jul-2018 18:00:00, 1.74e-01  
11-Jul-2018 19:00:00, 1.74e-01  
11-Jul-2018 20:00:00, 1.74e-01

11-Jul-2018 21:00:00, 1.74e-01  
11-Jul-2018 22:00:00, 1.75e-01  
11-Jul-2018 23:00:00, 1.75e-01  
12-Jul-2018, 1.75e-01  
12-Jul-2018 01:00:00, 1.75e-01  
12-Jul-2018 02:00:00, 1.75e-01  
12-Jul-2018 03:00:00, 1.75e-01  
12-Jul-2018 04:00:00, 1.75e-01  
12-Jul-2018 05:00:00, 1.75e-01  
12-Jul-2018 06:00:00, 1.75e-01  
12-Jul-2018 07:00:00, 1.75e-01  
12-Jul-2018 08:00:00, 1.75e-01  
12-Jul-2018 09:00:00, 1.75e-01  
12-Jul-2018 10:00:00, 1.75e-01  
12-Jul-2018 11:00:00, 1.75e-01  
12-Jul-2018 12:00:00, 1.74e-01  
12-Jul-2018 13:00:00, 1.74e-01  
12-Jul-2018 14:00:00, 1.74e-01  
12-Jul-2018 15:00:00, 1.74e-01  
12-Jul-2018 16:00:00, 1.74e-01  
12-Jul-2018 17:00:00, 1.74e-01  
12-Jul-2018 18:00:00, 1.74e-01  
12-Jul-2018 19:00:00, 1.74e-01  
12-Jul-2018 20:00:00, 1.75e-01  
12-Jul-2018 21:00:00, 1.75e-01  
12-Jul-2018 22:00:00, 1.75e-01  
12-Jul-2018 23:00:00, 1.75e-01  
13-Jul-2018, 1.75e-01  
13-Jul-2018 01:00:00, 1.75e-01  
13-Jul-2018 02:00:00, 1.75e-01  
13-Jul-2018 03:00:00, 1.75e-01  
13-Jul-2018 04:00:00, 1.75e-01  
13-Jul-2018 05:00:00, 1.75e-01  
13-Jul-2018 06:00:00, 1.75e-01  
13-Jul-2018 07:00:00, 1.75e-01  
13-Jul-2018 08:00:00, 1.75e-01  
13-Jul-2018 09:00:00, 1.75e-01  
13-Jul-2018 10:00:00, 1.75e-01  
13-Jul-2018 11:00:00, 1.75e-01  
13-Jul-2018 12:00:00, 1.75e-01  
13-Jul-2018 13:00:00, 1.74e-01  
13-Jul-2018 14:00:00, 1.74e-01  
13-Jul-2018 15:00:00, 1.74e-01  
13-Jul-2018 16:00:00, 1.74e-01  
13-Jul-2018 17:00:00, 1.74e-01  
13-Jul-2018 18:00:00, 1.75e-01  
13-Jul-2018 19:00:00, 1.75e-01  
13-Jul-2018 20:00:00, 1.75e-01  
13-Jul-2018 21:00:00, 1.75e-01  
13-Jul-2018 22:00:00, 1.75e-01  
13-Jul-2018 23:00:00, 1.76e-01  
14-Jul-2018, 1.76e-01  
14-Jul-2018 01:00:00, 1.76e-01  
14-Jul-2018 02:00:00, 1.76e-01  
14-Jul-2018 03:00:00, 1.76e-01  
14-Jul-2018 04:00:00, 1.76e-01  
14-Jul-2018 05:00:00, 1.76e-01  
14-Jul-2018 06:00:00, 1.76e-01  
14-Jul-2018 07:00:00, 1.76e-01  
14-Jul-2018 08:00:00, 1.76e-01  
14-Jul-2018 09:00:00, 1.76e-01  
14-Jul-2018 10:00:00, 1.76e-01  
14-Jul-2018 11:00:00, 1.76e-01  
14-Jul-2018 12:00:00, 1.76e-01

14-Jul-2018 13:00:00, 1.76e-01  
14-Jul-2018 14:00:00, 1.75e-01  
14-Jul-2018 15:00:00, 1.75e-01  
14-Jul-2018 16:00:00, 1.75e-01  
14-Jul-2018 17:00:00, 1.75e-01  
14-Jul-2018 18:00:00, 1.76e-01  
14-Jul-2018 19:00:00, 1.76e-01  
14-Jul-2018 20:00:00, 1.76e-01  
14-Jul-2018 21:00:00, 1.76e-01  
14-Jul-2018 22:00:00, 1.77e-01  
14-Jul-2018 23:00:00, 1.77e-01  
15-Jul-2018, 1.77e-01  
15-Jul-2018 01:00:00, 1.77e-01  
15-Jul-2018 02:00:00, 1.77e-01  
15-Jul-2018 03:00:00, 1.78e-01  
15-Jul-2018 04:00:00, 1.78e-01  
15-Jul-2018 05:00:00, 1.78e-01  
15-Jul-2018 06:00:00, 1.78e-01  
15-Jul-2018 07:00:00, 1.78e-01  
15-Jul-2018 08:00:00, 1.78e-01  
15-Jul-2018 09:00:00, 1.78e-01  
15-Jul-2018 10:00:00, 1.78e-01  
15-Jul-2018 11:00:00, 1.78e-01  
15-Jul-2018 12:00:00, 1.77e-01  
15-Jul-2018 13:00:00, 1.77e-01  
15-Jul-2018 14:00:00, 1.77e-01  
15-Jul-2018 15:00:00, 1.77e-01  
15-Jul-2018 16:00:00, 1.77e-01  
15-Jul-2018 17:00:00, 1.77e-01  
15-Jul-2018 18:00:00, 1.77e-01  
15-Jul-2018 19:00:00, 1.77e-01  
15-Jul-2018 20:00:00, 1.77e-01  
15-Jul-2018 21:00:00, 1.77e-01  
15-Jul-2018 22:00:00, 1.77e-01  
15-Jul-2018 23:00:00, 1.77e-01  
16-Jul-2018, 1.77e-01  
16-Jul-2018 01:00:00, 1.77e-01  
16-Jul-2018 02:00:00, 1.78e-01  
16-Jul-2018 03:00:00, 1.78e-01  
16-Jul-2018 04:00:00, 1.77e-01  
16-Jul-2018 05:00:00, 1.77e-01  
16-Jul-2018 06:00:00, 1.77e-01  
16-Jul-2018 07:00:00, 1.77e-01  
16-Jul-2018 08:00:00, 1.77e-01  
16-Jul-2018 09:00:00, 1.77e-01  
16-Jul-2018 10:00:00, 1.77e-01  
16-Jul-2018 11:00:00, 1.77e-01  
16-Jul-2018 12:00:00, 1.77e-01  
16-Jul-2018 13:00:00, 1.76e-01  
16-Jul-2018 14:00:00, 1.76e-01  
16-Jul-2018 15:00:00, 1.76e-01  
16-Jul-2018 16:00:00, 1.76e-01  
16-Jul-2018 17:00:00, 1.76e-01  
16-Jul-2018 18:00:00, 1.76e-01  
16-Jul-2018 19:00:00, 1.76e-01  
16-Jul-2018 20:00:00, 1.77e-01  
16-Jul-2018 21:00:00, 1.77e-01  
16-Jul-2018 22:00:00, 1.77e-01  
16-Jul-2018 23:00:00, 1.77e-01  
17-Jul-2018, 1.78e-01  
17-Jul-2018 01:00:00, 1.78e-01  
17-Jul-2018 02:00:00, 1.78e-01  
17-Jul-2018 03:00:00, 1.78e-01  
17-Jul-2018 04:00:00, 1.78e-01

17-Jul-2018 05:00:00, 1.78e-01  
17-Jul-2018 06:00:00, 1.78e-01  
17-Jul-2018 07:00:00, 1.78e-01  
17-Jul-2018 08:00:00, 1.78e-01  
17-Jul-2018 09:00:00, 1.78e-01  
17-Jul-2018 10:00:00, 1.77e-01  
17-Jul-2018 11:00:00, 1.77e-01  
17-Jul-2018 12:00:00, 1.77e-01  
17-Jul-2018 13:00:00, 1.77e-01  
17-Jul-2018 14:00:00, 1.77e-01  
17-Jul-2018 15:00:00, 1.77e-01  
17-Jul-2018 16:00:00, 1.77e-01  
17-Jul-2018 17:00:00, 1.77e-01  
17-Jul-2018 18:00:00, 1.77e-01  
17-Jul-2018 19:00:00, 1.77e-01  
17-Jul-2018 20:00:00, 1.77e-01  
17-Jul-2018 21:00:00, 1.77e-01  
17-Jul-2018 22:00:00, 1.78e-01  
17-Jul-2018 23:00:00, 1.78e-01  
18-Jul-2018, 1.78e-01  
18-Jul-2018 01:00:00, 1.78e-01  
18-Jul-2018 02:00:00, 1.78e-01  
18-Jul-2018 03:00:00, 1.78e-01  
18-Jul-2018 04:00:00, 1.78e-01  
18-Jul-2018 05:00:00, 1.78e-01  
18-Jul-2018 06:00:00, 1.78e-01  
18-Jul-2018 07:00:00, 1.78e-01  
18-Jul-2018 08:00:00, 1.78e-01  
18-Jul-2018 09:00:00, 1.78e-01  
18-Jul-2018 10:00:00, 1.77e-01  
18-Jul-2018 11:00:00, 1.77e-01  
18-Jul-2018 12:00:00, 1.77e-01  
18-Jul-2018 13:00:00, 1.77e-01  
18-Jul-2018 14:00:00, 1.77e-01  
18-Jul-2018 15:00:00, 1.77e-01  
18-Jul-2018 16:00:00, 1.76e-01  
18-Jul-2018 17:00:00, 1.76e-01  
18-Jul-2018 18:00:00, 1.76e-01  
18-Jul-2018 19:00:00, 1.77e-01  
18-Jul-2018 20:00:00, 1.77e-01  
18-Jul-2018 21:00:00, 1.77e-01  
18-Jul-2018 22:00:00, 1.77e-01  
18-Jul-2018 23:00:00, 1.77e-01  
19-Jul-2018, 1.78e-01  
19-Jul-2018 01:00:00, 1.78e-01  
19-Jul-2018 02:00:00, 1.78e-01  
19-Jul-2018 03:00:00, 1.78e-01  
19-Jul-2018 04:00:00, 1.78e-01  
19-Jul-2018 05:00:00, 1.78e-01  
19-Jul-2018 06:00:00, 1.78e-01  
19-Jul-2018 07:00:00, 1.78e-01  
19-Jul-2018 08:00:00, 1.78e-01  
19-Jul-2018 09:00:00, 1.78e-01  
19-Jul-2018 10:00:00, 1.77e-01  
19-Jul-2018 11:00:00, 1.77e-01  
19-Jul-2018 12:00:00, 1.77e-01  
19-Jul-2018 13:00:00, 1.77e-01  
19-Jul-2018 14:00:00, 1.77e-01  
19-Jul-2018 15:00:00, 1.76e-01  
19-Jul-2018 16:00:00, 1.76e-01  
19-Jul-2018 17:00:00, 1.76e-01  
19-Jul-2018 18:00:00, 1.76e-01  
19-Jul-2018 19:00:00, 1.76e-01  
19-Jul-2018 20:00:00, 1.76e-01

19-Jul-2018 21:00:00, 1.77e-01  
19-Jul-2018 22:00:00, 1.77e-01  
19-Jul-2018 23:00:00, 1.77e-01  
20-Jul-2018, 1.78e-01  
20-Jul-2018 01:00:00, 1.78e-01  
20-Jul-2018 02:00:00, 1.78e-01  
20-Jul-2018 03:00:00, 1.78e-01  
20-Jul-2018 04:00:00, 1.78e-01  
20-Jul-2018 05:00:00, 1.78e-01  
20-Jul-2018 06:00:00, 1.78e-01  
20-Jul-2018 07:00:00, 1.78e-01  
20-Jul-2018 08:00:00, 1.78e-01  
20-Jul-2018 09:00:00, 1.78e-01  
20-Jul-2018 10:00:00, 1.78e-01  
20-Jul-2018 11:00:00, 1.77e-01  
20-Jul-2018 12:00:00, 1.77e-01  
20-Jul-2018 13:00:00, 1.77e-01  
20-Jul-2018 14:00:00, 1.76e-01  
20-Jul-2018 15:00:00, 1.76e-01  
20-Jul-2018 16:00:00, 1.76e-01  
20-Jul-2018 17:00:00, 1.76e-01  
20-Jul-2018 18:00:00, 1.76e-01  
20-Jul-2018 19:00:00, 1.77e-01  
20-Jul-2018 20:00:00, 1.77e-01  
20-Jul-2018 21:00:00, 1.77e-01  
20-Jul-2018 22:00:00, 1.77e-01  
20-Jul-2018 23:00:00, 1.77e-01  
21-Jul-2018, 1.77e-01  
21-Jul-2018 01:00:00, 1.77e-01  
21-Jul-2018 02:00:00, 1.77e-01  
21-Jul-2018 03:00:00, 1.77e-01  
21-Jul-2018 04:00:00, 1.77e-01  
21-Jul-2018 05:00:00, 1.77e-01  
21-Jul-2018 06:00:00, 1.77e-01  
21-Jul-2018 07:00:00, 1.77e-01  
21-Jul-2018 08:00:00, 1.77e-01  
21-Jul-2018 09:00:00, 1.77e-01  
21-Jul-2018 10:00:00, 1.77e-01  
21-Jul-2018 11:00:00, 1.77e-01  
21-Jul-2018 12:00:00, 1.76e-01  
21-Jul-2018 13:00:00, 1.76e-01  
21-Jul-2018 14:00:00, 1.76e-01  
21-Jul-2018 15:00:00, 1.76e-01  
21-Jul-2018 16:00:00, 1.76e-01  
21-Jul-2018 17:00:00, 1.76e-01  
21-Jul-2018 18:00:00, 1.76e-01  
21-Jul-2018 19:00:00, 1.76e-01  
21-Jul-2018 20:00:00, 1.76e-01  
21-Jul-2018 21:00:00, 1.76e-01  
21-Jul-2018 22:00:00, 1.76e-01  
21-Jul-2018 23:00:00, 1.77e-01  
22-Jul-2018, 1.77e-01  
22-Jul-2018 01:00:00, 1.77e-01  
22-Jul-2018 02:00:00, 1.77e-01  
22-Jul-2018 03:00:00, 1.77e-01  
22-Jul-2018 04:00:00, 1.77e-01  
22-Jul-2018 05:00:00, 1.77e-01  
22-Jul-2018 06:00:00, 1.77e-01  
22-Jul-2018 07:00:00, 1.77e-01  
22-Jul-2018 08:00:00, 1.77e-01  
22-Jul-2018 09:00:00, 1.77e-01  
22-Jul-2018 10:00:00, 1.77e-01  
22-Jul-2018 11:00:00, 1.77e-01  
22-Jul-2018 12:00:00, 1.76e-01

22-Jul-2018 13:00:00, 1.76e-01  
22-Jul-2018 14:00:00, 1.76e-01  
22-Jul-2018 15:00:00, 1.76e-01  
22-Jul-2018 16:00:00, 1.76e-01  
22-Jul-2018 17:00:00, 1.75e-01  
22-Jul-2018 18:00:00, 1.76e-01  
22-Jul-2018 19:00:00, 1.76e-01  
22-Jul-2018 20:00:00, 1.76e-01  
22-Jul-2018 21:00:00, 1.76e-01  
22-Jul-2018 22:00:00, 1.77e-01  
22-Jul-2018 23:00:00, 1.77e-01  
23-Jul-2018, 1.77e-01  
23-Jul-2018 01:00:00, 1.77e-01  
23-Jul-2018 02:00:00, 1.77e-01  
23-Jul-2018 03:00:00, 1.77e-01  
23-Jul-2018 04:00:00, 1.77e-01  
23-Jul-2018 05:00:00, 1.78e-01  
23-Jul-2018 06:00:00, 1.78e-01  
23-Jul-2018 07:00:00, 1.77e-01  
23-Jul-2018 08:00:00, 1.77e-01  
23-Jul-2018 09:00:00, 1.77e-01  
23-Jul-2018 10:00:00, 1.77e-01  
23-Jul-2018 11:00:00, 1.77e-01  
23-Jul-2018 12:00:00, 1.77e-01  
23-Jul-2018 13:00:00, 1.76e-01  
23-Jul-2018 14:00:00, 1.76e-01  
23-Jul-2018 15:00:00, 1.76e-01  
23-Jul-2018 16:00:00, 1.76e-01  
23-Jul-2018 17:00:00, 1.76e-01  
23-Jul-2018 18:00:00, 1.76e-01  
23-Jul-2018 19:00:00, 1.76e-01  
23-Jul-2018 20:00:00, 1.76e-01  
23-Jul-2018 21:00:00, 1.76e-01  
23-Jul-2018 22:00:00, 1.76e-01  
23-Jul-2018 23:00:00, 1.77e-01  
24-Jul-2018, 1.77e-01  
24-Jul-2018 01:00:00, 1.77e-01  
24-Jul-2018 02:00:00, 1.77e-01  
24-Jul-2018 03:00:00, 1.77e-01  
24-Jul-2018 04:00:00, 1.77e-01  
24-Jul-2018 05:00:00, 1.77e-01  
24-Jul-2018 06:00:00, 1.77e-01  
24-Jul-2018 07:00:00, 1.77e-01  
24-Jul-2018 08:00:00, 1.77e-01  
24-Jul-2018 09:00:00, 1.77e-01  
24-Jul-2018 10:00:00, 1.76e-01  
24-Jul-2018 11:00:00, 1.76e-01  
24-Jul-2018 12:00:00, 1.76e-01  
24-Jul-2018 13:00:00, 1.76e-01  
24-Jul-2018 14:00:00, 1.75e-01  
24-Jul-2018 15:00:00, 1.75e-01  
24-Jul-2018 16:00:00, 1.75e-01  
24-Jul-2018 17:00:00, 1.75e-01  
24-Jul-2018 18:00:00, 1.75e-01  
24-Jul-2018 19:00:00, 1.75e-01  
24-Jul-2018 20:00:00, 1.75e-01  
24-Jul-2018 21:00:00, 1.76e-01  
24-Jul-2018 22:00:00, 1.76e-01  
24-Jul-2018 23:00:00, 1.76e-01  
25-Jul-2018, 1.76e-01  
25-Jul-2018 01:00:00, 1.76e-01  
25-Jul-2018 02:00:00, 1.76e-01  
25-Jul-2018 03:00:00, 1.76e-01  
25-Jul-2018 04:00:00, 1.76e-01

25-Jul-2018 05:00:00, 1.76e-01  
25-Jul-2018 06:00:00, 1.76e-01  
25-Jul-2018 07:00:00, 1.76e-01  
25-Jul-2018 08:00:00, 1.76e-01  
25-Jul-2018 09:00:00, 1.76e-01  
25-Jul-2018 10:00:00, 1.76e-01  
25-Jul-2018 11:00:00, 1.76e-01  
25-Jul-2018 12:00:00, 1.76e-01  
25-Jul-2018 13:00:00, 1.75e-01  
25-Jul-2018 14:00:00, 1.75e-01  
25-Jul-2018 15:00:00, 1.75e-01  
25-Jul-2018 16:00:00, 1.75e-01  
25-Jul-2018 17:00:00, 1.75e-01  
25-Jul-2018 18:00:00, 1.75e-01  
25-Jul-2018 19:00:00, 1.75e-01  
25-Jul-2018 20:00:00, 1.75e-01  
25-Jul-2018 21:00:00, 1.75e-01  
25-Jul-2018 22:00:00, 1.75e-01  
25-Jul-2018 23:00:00, 1.75e-01  
26-Jul-2018, 1.75e-01  
26-Jul-2018 01:00:00, 1.75e-01  
26-Jul-2018 02:00:00, 1.75e-01  
26-Jul-2018 03:00:00, 1.75e-01  
26-Jul-2018 04:00:00, 1.76e-01  
26-Jul-2018 05:00:00, 1.76e-01  
26-Jul-2018 06:00:00, 1.76e-01  
26-Jul-2018 07:00:00, 1.76e-01  
26-Jul-2018 08:00:00, 1.75e-01  
26-Jul-2018 09:00:00, 1.75e-01  
26-Jul-2018 10:00:00, 1.75e-01  
26-Jul-2018 11:00:00, 1.75e-01  
26-Jul-2018 12:00:00, 1.74e-01  
26-Jul-2018 13:00:00, 1.74e-01  
26-Jul-2018 14:00:00, 1.74e-01  
26-Jul-2018 15:00:00, 1.74e-01  
26-Jul-2018 16:00:00, 1.74e-01  
26-Jul-2018 17:00:00, 1.74e-01  
26-Jul-2018 18:00:00, 1.74e-01  
26-Jul-2018 19:00:00, 1.74e-01  
26-Jul-2018 20:00:00, 1.74e-01  
26-Jul-2018 21:00:00, 1.74e-01  
26-Jul-2018 22:00:00, 1.74e-01  
26-Jul-2018 23:00:00, 1.74e-01  
27-Jul-2018, 1.75e-01  
27-Jul-2018 01:00:00, 1.75e-01  
27-Jul-2018 02:00:00, 1.75e-01  
27-Jul-2018 03:00:00, 1.75e-01  
27-Jul-2018 04:00:00, 1.75e-01  
27-Jul-2018 05:00:00, 1.75e-01  
27-Jul-2018 06:00:00, 1.75e-01  
27-Jul-2018 07:00:00, 1.75e-01  
27-Jul-2018 08:00:00, 1.75e-01  
27-Jul-2018 09:00:00, 1.75e-01  
27-Jul-2018 10:00:00, 1.74e-01  
27-Jul-2018 11:00:00, 1.74e-01  
27-Jul-2018 12:00:00, 1.74e-01  
27-Jul-2018 13:00:00, 1.74e-01  
27-Jul-2018 14:00:00, 1.73e-01  
27-Jul-2018 15:00:00, 1.73e-01  
27-Jul-2018 16:00:00, 1.73e-01  
27-Jul-2018 17:00:00, 1.73e-01  
27-Jul-2018 18:00:00, 1.73e-01  
27-Jul-2018 19:00:00, 1.73e-01  
27-Jul-2018 20:00:00, 1.74e-01



27-Jul-2018 21:00:00, 1.74e-01  
27-Jul-2018 22:00:00, 1.74e-01  
27-Jul-2018 23:00:00, 1.74e-01  
28-Jul-2018, 1.74e-01  
28-Jul-2018 01:00:00, 1.74e-01  
28-Jul-2018 02:00:00, 1.74e-01  
28-Jul-2018 03:00:00, 1.74e-01  
28-Jul-2018 04:00:00, 1.74e-01  
28-Jul-2018 05:00:00, 1.74e-01  
28-Jul-2018 06:00:00, 1.74e-01  
28-Jul-2018 07:00:00, 1.74e-01  
28-Jul-2018 08:00:00, 1.74e-01  
28-Jul-2018 09:00:00, 1.74e-01  
28-Jul-2018 10:00:00, 1.74e-01  
28-Jul-2018 11:00:00, 1.74e-01  
28-Jul-2018 12:00:00, 1.73e-01  
28-Jul-2018 13:00:00, 1.73e-01  
28-Jul-2018 14:00:00, 1.73e-01  
28-Jul-2018 15:00:00, 1.73e-01  
28-Jul-2018 16:00:00, 1.72e-01  
28-Jul-2018 17:00:00, 1.72e-01  
28-Jul-2018 18:00:00, 1.72e-01  
28-Jul-2018 19:00:00, 1.72e-01  
28-Jul-2018 20:00:00, 1.72e-01  
28-Jul-2018 21:00:00, 1.73e-01  
28-Jul-2018 22:00:00, 1.73e-01  
28-Jul-2018 23:00:00, 1.73e-01  
29-Jul-2018, 1.73e-01  
29-Jul-2018 01:00:00, 1.73e-01  
29-Jul-2018 02:00:00, 1.73e-01  
29-Jul-2018 03:00:00, 1.73e-01  
29-Jul-2018 04:00:00, 1.73e-01  
29-Jul-2018 05:00:00, 1.73e-01  
29-Jul-2018 06:00:00, 1.73e-01  
29-Jul-2018 07:00:00, 1.73e-01  
29-Jul-2018 08:00:00, 1.73e-01  
29-Jul-2018 09:00:00, 1.73e-01  
29-Jul-2018 10:00:00, 1.73e-01  
29-Jul-2018 11:00:00, 1.73e-01  
29-Jul-2018 12:00:00, 1.72e-01  
29-Jul-2018 13:00:00, 1.72e-01  
29-Jul-2018 14:00:00, 1.72e-01  
29-Jul-2018 15:00:00, 1.72e-01  
29-Jul-2018 16:00:00, 1.72e-01  
29-Jul-2018 17:00:00, 1.72e-01  
29-Jul-2018 18:00:00, 1.72e-01  
29-Jul-2018 19:00:00, 1.72e-01  
29-Jul-2018 20:00:00, 1.72e-01  
29-Jul-2018 21:00:00, 1.72e-01  
29-Jul-2018 22:00:00, 1.73e-01  
29-Jul-2018 23:00:00, 1.73e-01  
30-Jul-2018, 1.73e-01  
30-Jul-2018 01:00:00, 1.73e-01  
30-Jul-2018 02:00:00, 1.73e-01  
30-Jul-2018 03:00:00, 1.73e-01  
30-Jul-2018 04:00:00, 1.73e-01  
30-Jul-2018 05:00:00, 1.73e-01  
30-Jul-2018 06:00:00, 1.73e-01  
30-Jul-2018 07:00:00, 1.73e-01  
30-Jul-2018 08:00:00, 1.73e-01  
30-Jul-2018 09:00:00, 1.73e-01  
30-Jul-2018 10:00:00, 1.72e-01  
30-Jul-2018 11:00:00, 1.72e-01  
30-Jul-2018 12:00:00, 1.72e-01

30-Jul-2018 13:00:00, 1.72e-01  
30-Jul-2018 14:00:00, 1.71e-01  
30-Jul-2018 15:00:00, 1.71e-01  
30-Jul-2018 16:00:00, 1.71e-01  
30-Jul-2018 17:00:00, 1.71e-01  
30-Jul-2018 18:00:00, 1.71e-01  
30-Jul-2018 19:00:00, 1.71e-01  
30-Jul-2018 20:00:00, 1.71e-01  
30-Jul-2018 21:00:00, 1.72e-01  
30-Jul-2018 22:00:00, 1.72e-01  
30-Jul-2018 23:00:00, 1.72e-01  
31-Jul-2018, 1.72e-01  
31-Jul-2018 01:00:00, 1.73e-01  
31-Jul-2018 02:00:00, 1.73e-01  
31-Jul-2018 03:00:00, 1.73e-01  
31-Jul-2018 04:00:00, 1.73e-01  
31-Jul-2018 05:00:00, 1.73e-01  
31-Jul-2018 06:00:00, 1.73e-01  
31-Jul-2018 07:00:00, 1.73e-01  
31-Jul-2018 08:00:00, 1.73e-01  
31-Jul-2018 09:00:00, 1.73e-01  
31-Jul-2018 10:00:00, 1.72e-01  
31-Jul-2018 11:00:00, 1.72e-01  
31-Jul-2018 12:00:00, 1.72e-01  
31-Jul-2018 13:00:00, 1.71e-01  
31-Jul-2018 14:00:00, 1.71e-01  
31-Jul-2018 15:00:00, 1.71e-01  
31-Jul-2018 16:00:00, 1.71e-01  
31-Jul-2018 17:00:00, 1.71e-01  
31-Jul-2018 18:00:00, 1.71e-01  
31-Jul-2018 19:00:00, 1.71e-01  
31-Jul-2018 20:00:00, 1.72e-01  
31-Jul-2018 21:00:00, 1.72e-01  
31-Jul-2018 22:00:00, 1.72e-01  
31-Jul-2018 23:00:00, 1.72e-01  
01-Aug-2018, 1.72e-01  
01-Aug-2018 01:00:00, 1.73e-01  
01-Aug-2018 02:00:00, 1.73e-01  
01-Aug-2018 03:00:00, 1.73e-01  
01-Aug-2018 04:00:00, 1.73e-01  
01-Aug-2018 05:00:00, 1.73e-01  
01-Aug-2018 06:00:00, 1.73e-01  
01-Aug-2018 07:00:00, 1.73e-01  
01-Aug-2018 08:00:00, 1.73e-01  
01-Aug-2018 09:00:00, 1.73e-01  
01-Aug-2018 10:00:00, 1.72e-01  
01-Aug-2018 11:00:00, 1.72e-01  
01-Aug-2018 12:00:00, 1.72e-01  
01-Aug-2018 13:00:00, 1.72e-01  
01-Aug-2018 14:00:00, 1.72e-01  
01-Aug-2018 15:00:00, 1.71e-01  
01-Aug-2018 16:00:00, 1.71e-01  
01-Aug-2018 17:00:00, 1.71e-01  
01-Aug-2018 18:00:00, 1.71e-01  
01-Aug-2018 19:00:00, 1.71e-01  
01-Aug-2018 20:00:00, 1.72e-01  
01-Aug-2018 21:00:00, 1.72e-01  
01-Aug-2018 22:00:00, 1.72e-01  
01-Aug-2018 23:00:00, 1.72e-01  
02-Aug-2018, 1.72e-01  
02-Aug-2018 01:00:00, 1.72e-01  
02-Aug-2018 02:00:00, 1.72e-01  
02-Aug-2018 03:00:00, 1.72e-01  
02-Aug-2018 04:00:00, 1.72e-01

02-Aug-2018 05:00:00, 1.72e-01  
02-Aug-2018 06:00:00, 1.72e-01  
02-Aug-2018 07:00:00, 1.72e-01  
02-Aug-2018 08:00:00, 1.72e-01  
02-Aug-2018 09:00:00, 1.72e-01  
02-Aug-2018 10:00:00, 1.72e-01  
02-Aug-2018 11:00:00, 1.72e-01  
02-Aug-2018 12:00:00, 1.71e-01  
02-Aug-2018 13:00:00, 1.71e-01  
02-Aug-2018 14:00:00, 1.71e-01  
02-Aug-2018 15:00:00, 1.71e-01  
02-Aug-2018 16:00:00, 1.71e-01  
02-Aug-2018 17:00:00, 1.71e-01  
02-Aug-2018 18:00:00, 1.71e-01  
02-Aug-2018 19:00:00, 1.71e-01  
02-Aug-2018 20:00:00, 1.71e-01  
02-Aug-2018 21:00:00, 1.71e-01  
02-Aug-2018 22:00:00, 1.72e-01  
02-Aug-2018 23:00:00, 1.72e-01  
03-Aug-2018, 1.72e-01  
03-Aug-2018 01:00:00, 1.72e-01  
03-Aug-2018 02:00:00, 1.72e-01  
03-Aug-2018 03:00:00, 1.72e-01  
03-Aug-2018 04:00:00, 1.72e-01  
03-Aug-2018 05:00:00, 1.72e-01  
03-Aug-2018 06:00:00, 1.72e-01  
03-Aug-2018 07:00:00, 1.72e-01  
03-Aug-2018 08:00:00, 1.72e-01  
03-Aug-2018 09:00:00, 1.72e-01  
03-Aug-2018 10:00:00, 1.72e-01  
03-Aug-2018 11:00:00, 1.72e-01  
03-Aug-2018 12:00:00, 1.72e-01  
03-Aug-2018 13:00:00, 1.72e-01  
03-Aug-2018 14:00:00, 1.72e-01  
03-Aug-2018 15:00:00, 1.72e-01  
03-Aug-2018 16:00:00, 1.72e-01  
03-Aug-2018 17:00:00, 1.72e-01  
03-Aug-2018 18:00:00, 1.72e-01  
03-Aug-2018 19:00:00, 1.71e-01  
03-Aug-2018 20:00:00, 1.72e-01  
03-Aug-2018 21:00:00, 1.72e-01  
03-Aug-2018 22:00:00, 1.72e-01  
03-Aug-2018 23:00:00, 1.72e-01  
04-Aug-2018, 1.72e-01  
04-Aug-2018 01:00:00, 1.72e-01  
04-Aug-2018 02:00:00, 1.72e-01  
04-Aug-2018 03:00:00, 1.72e-01  
04-Aug-2018 04:00:00, 1.72e-01  
04-Aug-2018 05:00:00, 1.72e-01  
04-Aug-2018 06:00:00, 1.72e-01  
04-Aug-2018 07:00:00, 1.72e-01  
04-Aug-2018 08:00:00, 1.72e-01  
04-Aug-2018 09:00:00, 1.72e-01  
04-Aug-2018 10:00:00, 1.71e-01  
04-Aug-2018 11:00:00, 1.71e-01  
04-Aug-2018 12:00:00, 1.71e-01  
04-Aug-2018 13:00:00, 1.71e-01  
04-Aug-2018 14:00:00, 1.70e-01  
04-Aug-2018 15:00:00, 1.70e-01  
04-Aug-2018 16:00:00, 1.70e-01  
04-Aug-2018 17:00:00, 1.70e-01  
04-Aug-2018 18:00:00, 1.70e-01  
04-Aug-2018 19:00:00, 1.70e-01  
04-Aug-2018 20:00:00, 1.71e-01

04-Aug-2018 21:00:00, 1.71e-01  
04-Aug-2018 22:00:00, 1.71e-01  
04-Aug-2018 23:00:00, 1.71e-01  
05-Aug-2018, 1.71e-01  
05-Aug-2018 01:00:00, 1.72e-01  
05-Aug-2018 02:00:00, 1.72e-01  
05-Aug-2018 03:00:00, 1.72e-01  
05-Aug-2018 04:00:00, 1.72e-01  
05-Aug-2018 05:00:00, 1.72e-01  
05-Aug-2018 06:00:00, 1.72e-01  
05-Aug-2018 07:00:00, 1.71e-01  
05-Aug-2018 08:00:00, 1.71e-01  
05-Aug-2018 09:00:00, 1.71e-01  
05-Aug-2018 10:00:00, 1.71e-01  
05-Aug-2018 11:00:00, 1.71e-01  
05-Aug-2018 12:00:00, 1.71e-01  
05-Aug-2018 13:00:00, 1.70e-01  
05-Aug-2018 14:00:00, 1.70e-01  
05-Aug-2018 15:00:00, 1.70e-01  
05-Aug-2018 16:00:00, 1.70e-01  
05-Aug-2018 17:00:00, 1.70e-01  
05-Aug-2018 18:00:00, 1.70e-01  
05-Aug-2018 19:00:00, 1.70e-01  
05-Aug-2018 20:00:00, 1.70e-01  
05-Aug-2018 21:00:00, 1.71e-01  
05-Aug-2018 22:00:00, 1.71e-01  
05-Aug-2018 23:00:00, 1.71e-01  
06-Aug-2018, 1.71e-01  
06-Aug-2018 01:00:00, 1.71e-01  
06-Aug-2018 02:00:00, 1.71e-01  
06-Aug-2018 03:00:00, 1.72e-01  
06-Aug-2018 04:00:00, 1.72e-01  
06-Aug-2018 05:00:00, 1.72e-01  
06-Aug-2018 06:00:00, 1.72e-01  
06-Aug-2018 07:00:00, 1.72e-01  
06-Aug-2018 08:00:00, 1.72e-01  
06-Aug-2018 09:00:00, 1.71e-01  
06-Aug-2018 10:00:00, 1.71e-01  
06-Aug-2018 11:00:00, 1.71e-01  
06-Aug-2018 12:00:00, 1.71e-01  
06-Aug-2018 13:00:00, 1.70e-01  
06-Aug-2018 14:00:00, 1.70e-01  
06-Aug-2018 15:00:00, 1.70e-01  
06-Aug-2018 16:00:00, 1.70e-01  
06-Aug-2018 16:00:00, 1.70e-01  
06-Aug-2018 17:00:00, 1.70e-01  
06-Aug-2018 18:00:00, 1.70e-01  
06-Aug-2018 19:00:00, 1.70e-01  
06-Aug-2018 20:00:00, 1.71e-01  
06-Aug-2018 21:00:00, 1.71e-01  
06-Aug-2018 22:00:00, 1.71e-01  
06-Aug-2018 23:00:00, 1.71e-01  
07-Aug-2018, 1.72e-01  
07-Aug-2018 01:00:00, 1.72e-01  
07-Aug-2018 02:00:00, 1.72e-01  
07-Aug-2018 03:00:00, 1.72e-01  
07-Aug-2018 04:00:00, 1.72e-01  
07-Aug-2018 05:00:00, 1.72e-01  
07-Aug-2018 06:00:00, 1.72e-01  
07-Aug-2018 07:00:00, 1.72e-01  
07-Aug-2018 08:00:00, 1.72e-01  
07-Aug-2018 09:00:00, 1.71e-01  
07-Aug-2018 10:00:00, 1.71e-01  
07-Aug-2018 11:00:00, 1.71e-01

07-Aug-2018 12:00:00, 1.70e-01  
07-Aug-2018 13:00:00, 1.70e-01  
07-Aug-2018 14:00:00, 1.70e-01  
07-Aug-2018 15:00:00, 1.70e-01  
07-Aug-2018 16:00:00, 1.70e-01  
07-Aug-2018 17:00:00, 1.70e-01  
07-Aug-2018 18:00:00, 1.70e-01  
07-Aug-2018 19:00:00, 1.70e-01  
07-Aug-2018 20:00:00, 1.71e-01  
07-Aug-2018 21:00:00, 1.71e-01  
07-Aug-2018 22:00:00, 1.71e-01  
07-Aug-2018 23:00:00, 1.71e-01  
08-Aug-2018, 1.71e-01  
08-Aug-2018 01:00:00, 1.72e-01  
08-Aug-2018 02:00:00, 1.72e-01  
08-Aug-2018 03:00:00, 1.72e-01  
08-Aug-2018 04:00:00, 1.72e-01  
08-Aug-2018 05:00:00, 1.72e-01  
08-Aug-2018 06:00:00, 1.72e-01  
08-Aug-2018 07:00:00, 1.72e-01  
08-Aug-2018 08:00:00, 1.72e-01  
08-Aug-2018 09:00:00, 1.71e-01  
08-Aug-2018 10:00:00, 1.71e-01  
08-Aug-2018 11:00:00, 1.71e-01  
08-Aug-2018 12:00:00, 1.70e-01  
08-Aug-2018 13:00:00, 1.70e-01  
08-Aug-2018 14:00:00, 1.70e-01  
08-Aug-2018 15:00:00, 1.70e-01  
08-Aug-2018 16:00:00, 1.70e-01  
08-Aug-2018 17:00:00, 1.70e-01  
08-Aug-2018 18:00:00, 1.70e-01  
08-Aug-2018 19:00:00, 1.70e-01  
08-Aug-2018 20:00:00, 1.71e-01  
08-Aug-2018 21:00:00, 1.71e-01  
08-Aug-2018 22:00:00, 1.71e-01  
08-Aug-2018 23:00:00, 1.71e-01  
09-Aug-2018, 1.71e-01  
09-Aug-2018 01:00:00, 1.72e-01  
09-Aug-2018 02:00:00, 1.72e-01  
09-Aug-2018 03:00:00, 1.72e-01  
09-Aug-2018 04:00:00, 1.72e-01  
09-Aug-2018 05:00:00, 1.72e-01  
09-Aug-2018 06:00:00, 1.72e-01  
09-Aug-2018 07:00:00, 1.72e-01  
09-Aug-2018 08:00:00, 1.71e-01  
09-Aug-2018 09:00:00, 1.71e-01  
09-Aug-2018 10:00:00, 1.71e-01  
09-Aug-2018 11:00:00, 1.71e-01  
09-Aug-2018 12:00:00, 1.70e-01  
09-Aug-2018 13:00:00, 1.70e-01  
09-Aug-2018 14:00:00, 1.70e-01  
09-Aug-2018 15:00:00, 1.70e-01  
09-Aug-2018 16:00:00, 1.70e-01  
09-Aug-2018 17:00:00, 1.70e-01  
09-Aug-2018 18:00:00, 1.70e-01  
09-Aug-2018 19:00:00, 1.70e-01  
09-Aug-2018 20:00:00, 1.71e-01  
09-Aug-2018 21:00:00, 1.71e-01  
09-Aug-2018 22:00:00, 1.71e-01  
09-Aug-2018 23:00:00, 1.71e-01  
10-Aug-2018, 1.72e-01  
10-Aug-2018 01:00:00, 1.72e-01  
10-Aug-2018 02:00:00, 1.72e-01  
10-Aug-2018 03:00:00, 1.72e-01

10-Aug-2018 04:00:00, 1.72e-01  
10-Aug-2018 05:00:00, 1.72e-01  
10-Aug-2018 06:00:00, 1.72e-01  
10-Aug-2018 07:00:00, 1.72e-01  
10-Aug-2018 08:00:00, 1.72e-01  
10-Aug-2018 09:00:00, 1.71e-01  
10-Aug-2018 10:00:00, 1.71e-01  
10-Aug-2018 11:00:00, 1.71e-01  
10-Aug-2018 12:00:00, 1.71e-01  
10-Aug-2018 13:00:00, 1.70e-01  
10-Aug-2018 14:00:00, 1.70e-01  
10-Aug-2018 15:00:00, 1.70e-01  
10-Aug-2018 16:00:00, NaN  
10-Aug-2018 17:00:00, NaN  
10-Aug-2018 18:00:00, NaN  
10-Aug-2018 19:00:00, NaN  
10-Aug-2018 20:00:00, NaN  
10-Aug-2018 21:00:00, NaN  
10-Aug-2018 22:00:00, NaN  
10-Aug-2018 23:00:00, NaN  
11-Aug-2018, NaN  
11-Aug-2018 01:00:00, NaN  
11-Aug-2018 02:00:00, NaN  
11-Aug-2018 03:00:00, NaN  
11-Aug-2018 04:00:00, NaN  
11-Aug-2018 05:00:00, NaN  
11-Aug-2018 06:00:00, NaN  
11-Aug-2018 07:00:00, NaN  
11-Aug-2018 08:00:00, 1.71e-01  
11-Aug-2018 09:00:00, 1.71e-01  
11-Aug-2018 10:00:00, 1.70e-01  
11-Aug-2018 11:00:00, 1.70e-01  
11-Aug-2018 12:00:00, 1.70e-01  
11-Aug-2018 13:00:00, 1.70e-01  
11-Aug-2018 14:00:00, 1.70e-01  
11-Aug-2018 15:00:00, 1.69e-01  
11-Aug-2018 16:00:00, 1.70e-01  
11-Aug-2018 17:00:00, 1.70e-01  
11-Aug-2018 18:00:00, NaN  
11-Aug-2018 19:00:00, NaN  
11-Aug-2018 20:00:00, NaN  
11-Aug-2018 21:00:00, NaN  
11-Aug-2018 22:00:00, NaN  
11-Aug-2018 23:00:00, NaN  
12-Aug-2018, NaN  
12-Aug-2018 01:00:00, NaN  
12-Aug-2018 02:00:00, NaN  
12-Aug-2018 03:00:00, NaN  
12-Aug-2018 04:00:00, NaN  
12-Aug-2018 05:00:00, NaN  
12-Aug-2018 06:00:00, NaN  
12-Aug-2018 07:00:00, NaN  
12-Aug-2018 08:00:00, NaN  
12-Aug-2018 09:00:00, 1.71e-01  
12-Aug-2018 10:00:00, 1.70e-01  
12-Aug-2018 11:00:00, 1.70e-01  
12-Aug-2018 12:00:00, 1.70e-01  
12-Aug-2018 13:00:00, 1.70e-01  
12-Aug-2018 14:00:00, 1.70e-01  
12-Aug-2018 15:00:00, 1.69e-01  
12-Aug-2018 16:00:00, 1.69e-01  
12-Aug-2018 17:00:00, NaN  
12-Aug-2018 18:00:00, NaN  
12-Aug-2018 19:00:00, NaN

|              |           |          |
|--------------|-----------|----------|
| 12-Aug-2018  | 20:00:00, | NaN      |
| 12-Aug-2018  | 21:00:00, | NaN      |
| 12-Aug-2018  | 22:00:00, | NaN      |
| 12-Aug-2018  | 23:00:00, | NaN      |
| 13-Aug-2018, |           | NaN      |
| 13-Aug-2018  | 01:00:00, | NaN      |
| 13-Aug-2018  | 02:00:00, | NaN      |
| 13-Aug-2018  | 03:00:00, | NaN      |
| 13-Aug-2018  | 04:00:00, | NaN      |
| 13-Aug-2018  | 05:00:00, | NaN      |
| 13-Aug-2018  | 06:00:00, | NaN      |
| 13-Aug-2018  | 07:00:00, | NaN      |
| 13-Aug-2018  | 08:00:00, | NaN      |
| 13-Aug-2018  | 09:00:00, | 1.70e-01 |
| 13-Aug-2018  | 10:00:00, | 1.70e-01 |
| 13-Aug-2018  | 11:00:00, | 1.70e-01 |
| 13-Aug-2018  | 12:00:00, | NaN      |
| 13-Aug-2018  | 13:00:00, | NaN      |
| 13-Aug-2018  | 14:00:00, | NaN      |
| 13-Aug-2018  | 15:00:00, | NaN      |
| 13-Aug-2018  | 16:00:00, | NaN      |
| 13-Aug-2018  | 17:00:00, | NaN      |
| 13-Aug-2018  | 18:00:00, | NaN      |
| 13-Aug-2018  | 19:00:00, | NaN      |
| 13-Aug-2018  | 20:00:00, | NaN      |
| 13-Aug-2018  | 21:00:00, | NaN      |
| 13-Aug-2018  | 22:00:00, | NaN      |
| 13-Aug-2018  | 23:00:00, | NaN      |
| 14-Aug-2018, |           | NaN      |
| 14-Aug-2018  | 01:00:00, | NaN      |
| 14-Aug-2018  | 02:00:00, | NaN      |
| 14-Aug-2018  | 03:00:00, | NaN      |
| 14-Aug-2018  | 04:00:00, | NaN      |
| 14-Aug-2018  | 05:00:00, | NaN      |
| 14-Aug-2018  | 06:00:00, | NaN      |
| 14-Aug-2018  | 07:00:00, | NaN      |
| 14-Aug-2018  | 08:00:00, | NaN      |
| 14-Aug-2018  | 09:00:00, | NaN      |
| 14-Aug-2018  | 10:00:00, | NaN      |
| 14-Aug-2018  | 11:00:00, | NaN      |
| 14-Aug-2018  | 12:00:00, | NaN      |
| 14-Aug-2018  | 13:00:00, | NaN      |
| 14-Aug-2018  | 14:00:00, | NaN      |
| 14-Aug-2018  | 15:00:00, | NaN      |
| 14-Aug-2018  | 16:00:00, | NaN      |
| 14-Aug-2018  | 17:00:00, | NaN      |
| 14-Aug-2018  | 18:00:00, | NaN      |
| 14-Aug-2018  | 19:00:00, | NaN      |
| 14-Aug-2018  | 20:00:00, | NaN      |
| 14-Aug-2018  | 21:00:00, | NaN      |
| 14-Aug-2018  | 22:00:00, | NaN      |
| 14-Aug-2018  | 23:00:00, | NaN      |
| 15-Aug-2018, |           | NaN      |
| 15-Aug-2018  | 01:00:00, | NaN      |
| 15-Aug-2018  | 02:00:00, | NaN      |
| 15-Aug-2018  | 03:00:00, | NaN      |
| 15-Aug-2018  | 04:00:00, | NaN      |
| 15-Aug-2018  | 05:00:00, | NaN      |
| 15-Aug-2018  | 06:00:00, | NaN      |
| 15-Aug-2018  | 07:00:00, | NaN      |
| 15-Aug-2018  | 08:00:00, | NaN      |
| 15-Aug-2018  | 09:00:00, | NaN      |
| 15-Aug-2018  | 10:00:00, | NaN      |
| 15-Aug-2018  | 11:00:00, | NaN      |

15-Aug-2018 12:00:00, NaN  
15-Aug-2018 13:00:00, NaN  
15-Aug-2018 14:00:00, NaN  
15-Aug-2018 15:00:00, NaN  
15-Aug-2018 16:00:00, NaN  
15-Aug-2018 17:00:00, NaN  
15-Aug-2018 18:00:00, NaN  
15-Aug-2018 19:00:00, NaN  
15-Aug-2018 20:00:00, NaN  
15-Aug-2018 21:00:00, NaN  
15-Aug-2018 22:00:00, NaN  
15-Aug-2018 23:00:00, NaN  
16-Aug-2018, NaN  
16-Aug-2018 01:00:00, NaN  
16-Aug-2018 02:00:00, NaN  
16-Aug-2018 03:00:00, NaN  
16-Aug-2018 04:00:00, NaN  
16-Aug-2018 05:00:00, NaN  
16-Aug-2018 06:00:00, NaN  
16-Aug-2018 07:00:00, NaN  
16-Aug-2018 08:00:00, NaN  
16-Aug-2018 09:00:00, NaN  
16-Aug-2018 10:00:00, NaN  
16-Aug-2018 11:00:00, NaN  
16-Aug-2018 12:00:00, NaN  
16-Aug-2018 13:00:00, NaN  
16-Aug-2018 14:00:00, NaN  
16-Aug-2018 15:00:00, NaN  
16-Aug-2018 16:00:00, NaN  
16-Aug-2018 17:00:00, NaN  
16-Aug-2018 18:00:00, NaN  
16-Aug-2018 19:00:00, NaN  
16-Aug-2018 20:00:00, NaN  
16-Aug-2018 21:00:00, NaN  
16-Aug-2018 22:00:00, NaN  
16-Aug-2018 23:00:00, NaN  
17-Aug-2018, NaN  
17-Aug-2018 01:00:00, NaN  
17-Aug-2018 02:00:00, NaN  
17-Aug-2018 03:00:00, NaN  
17-Aug-2018 04:00:00, NaN  
17-Aug-2018 05:00:00, NaN  
17-Aug-2018 06:00:00, NaN  
17-Aug-2018 07:00:00, NaN  
17-Aug-2018 08:00:00, NaN  
17-Aug-2018 09:00:00, NaN  
17-Aug-2018 10:00:00, NaN  
17-Aug-2018 11:00:00, NaN  
17-Aug-2018 12:00:00, NaN  
17-Aug-2018 13:00:00, NaN  
17-Aug-2018 14:00:00, NaN  
17-Aug-2018 15:00:00, NaN  
17-Aug-2018 16:00:00, NaN  
17-Aug-2018 17:00:00, NaN  
17-Aug-2018 18:00:00, NaN  
17-Aug-2018 19:00:00, NaN  
17-Aug-2018 20:00:00, NaN  
17-Aug-2018 21:00:00, NaN  
17-Aug-2018 22:00:00, NaN  
17-Aug-2018 23:00:00, NaN  
18-Aug-2018, NaN  
18-Aug-2018 01:00:00, NaN  
18-Aug-2018 02:00:00, NaN  
18-Aug-2018 03:00:00, NaN



18-Aug-2018 04:00:00, NaN  
18-Aug-2018 05:00:00, NaN  
18-Aug-2018 06:00:00, NaN  
18-Aug-2018 07:00:00, NaN  
18-Aug-2018 08:00:00, NaN  
18-Aug-2018 09:00:00, NaN  
18-Aug-2018 10:00:00, NaN  
18-Aug-2018 11:00:00, NaN  
18-Aug-2018 12:00:00, NaN  
18-Aug-2018 13:00:00, NaN  
18-Aug-2018 14:00:00, NaN  
18-Aug-2018 15:00:00, NaN  
18-Aug-2018 16:00:00, NaN  
18-Aug-2018 17:00:00, NaN  
18-Aug-2018 18:00:00, NaN  
18-Aug-2018 19:00:00, NaN  
18-Aug-2018 20:00:00, NaN  
18-Aug-2018 21:00:00, NaN  
18-Aug-2018 22:00:00, NaN  
18-Aug-2018 23:00:00, NaN  
19-Aug-2018, NaN  
19-Aug-2018 01:00:00, NaN  
19-Aug-2018 02:00:00, NaN  
19-Aug-2018 03:00:00, NaN  
19-Aug-2018 04:00:00, NaN  
19-Aug-2018 05:00:00, NaN  
19-Aug-2018 06:00:00, NaN  
19-Aug-2018 07:00:00, NaN  
19-Aug-2018 08:00:00, NaN  
19-Aug-2018 09:00:00, NaN  
19-Aug-2018 10:00:00, NaN  
19-Aug-2018 11:00:00, NaN  
19-Aug-2018 12:00:00, NaN  
19-Aug-2018 13:00:00, NaN  
19-Aug-2018 14:00:00, NaN  
19-Aug-2018 15:00:00, NaN  
19-Aug-2018 16:00:00, NaN  
19-Aug-2018 17:00:00, NaN  
19-Aug-2018 18:00:00, NaN  
19-Aug-2018 19:00:00, NaN  
19-Aug-2018 20:00:00, NaN  
19-Aug-2018 21:00:00, NaN  
19-Aug-2018 22:00:00, NaN  
19-Aug-2018 23:00:00, NaN  
20-Aug-2018, NaN  
20-Aug-2018 01:00:00, NaN  
20-Aug-2018 02:00:00, NaN  
20-Aug-2018 03:00:00, NaN  
20-Aug-2018 04:00:00, NaN  
20-Aug-2018 05:00:00, NaN  
20-Aug-2018 06:00:00, NaN  
20-Aug-2018 07:00:00, NaN  
20-Aug-2018 08:00:00, NaN  
20-Aug-2018 09:00:00, NaN  
20-Aug-2018 10:00:00, NaN  
20-Aug-2018 11:00:00, NaN  
20-Aug-2018 12:00:00, NaN  
20-Aug-2018 13:00:00, NaN  
20-Aug-2018 14:00:00, NaN  
20-Aug-2018 15:00:00, NaN  
20-Aug-2018 16:00:00, NaN  
20-Aug-2018 17:00:00, NaN  
20-Aug-2018 18:00:00, NaN  
20-Aug-2018 19:00:00, NaN

|              |           |     |
|--------------|-----------|-----|
| 20-Aug-2018  | 20:00:00, | NaN |
| 20-Aug-2018  | 21:00:00, | NaN |
| 20-Aug-2018  | 22:00:00, | NaN |
| 20-Aug-2018  | 23:00:00, | NaN |
| 21-Aug-2018, | NaN       |     |
| 21-Aug-2018  | 01:00:00, | NaN |
| 21-Aug-2018  | 02:00:00, | NaN |
| 21-Aug-2018  | 03:00:00, | NaN |
| 21-Aug-2018  | 04:00:00, | NaN |
| 21-Aug-2018  | 05:00:00, | NaN |
| 21-Aug-2018  | 06:00:00, | NaN |
| 21-Aug-2018  | 07:00:00, | NaN |
| 21-Aug-2018  | 08:00:00, | NaN |
| 21-Aug-2018  | 09:00:00, | NaN |
| 21-Aug-2018  | 10:00:00, | NaN |
| 21-Aug-2018  | 11:00:00, | NaN |
| 21-Aug-2018  | 12:00:00, | NaN |
| 21-Aug-2018  | 13:00:00, | NaN |
| 21-Aug-2018  | 14:00:00, | NaN |
| 21-Aug-2018  | 15:00:00, | NaN |
| 21-Aug-2018  | 16:00:00, | NaN |
| 21-Aug-2018  | 17:00:00, | NaN |
| 21-Aug-2018  | 18:00:00, | NaN |
| 21-Aug-2018  | 19:00:00, | NaN |
| 21-Aug-2018  | 20:00:00, | NaN |
| 21-Aug-2018  | 21:00:00, | NaN |
| 21-Aug-2018  | 22:00:00, | NaN |
| 21-Aug-2018  | 23:00:00, | NaN |
| 22-Aug-2018, | NaN       |     |
| 22-Aug-2018  | 01:00:00, | NaN |
| 22-Aug-2018  | 02:00:00, | NaN |
| 22-Aug-2018  | 03:00:00, | NaN |
| 22-Aug-2018  | 04:00:00, | NaN |
| 22-Aug-2018  | 05:00:00, | NaN |
| 22-Aug-2018  | 06:00:00, | NaN |
| 22-Aug-2018  | 07:00:00, | NaN |
| 22-Aug-2018  | 08:00:00, | NaN |
| 22-Aug-2018  | 09:00:00, | NaN |
| 22-Aug-2018  | 10:00:00, | NaN |
| 22-Aug-2018  | 11:00:00, | NaN |
| 22-Aug-2018  | 12:00:00, | NaN |
| 22-Aug-2018  | 13:00:00, | NaN |
| 22-Aug-2018  | 14:00:00, | NaN |
| 22-Aug-2018  | 15:00:00, | NaN |
| 22-Aug-2018  | 16:00:00, | NaN |
| 22-Aug-2018  | 17:00:00, | NaN |
| 22-Aug-2018  | 18:00:00, | NaN |
| 22-Aug-2018  | 19:00:00, | NaN |
| 22-Aug-2018  | 20:00:00, | NaN |
| 22-Aug-2018  | 21:00:00, | NaN |
| 22-Aug-2018  | 22:00:00, | NaN |
| 22-Aug-2018  | 23:00:00, | NaN |
| 23-Aug-2018, | NaN       |     |
| 23-Aug-2018  | 01:00:00, | NaN |
| 23-Aug-2018  | 02:00:00, | NaN |
| 23-Aug-2018  | 03:00:00, | NaN |
| 23-Aug-2018  | 04:00:00, | NaN |
| 23-Aug-2018  | 05:00:00, | NaN |
| 23-Aug-2018  | 06:00:00, | NaN |
| 23-Aug-2018  | 07:00:00, | NaN |
| 23-Aug-2018  | 08:00:00, | NaN |
| 23-Aug-2018  | 09:00:00, | NaN |
| 23-Aug-2018  | 10:00:00, | NaN |
| 23-Aug-2018  | 11:00:00, | NaN |

23-Aug-2018 12:00:00, NaN  
23-Aug-2018 13:00:00, NaN  
23-Aug-2018 14:00:00, NaN  
23-Aug-2018 15:00:00, NaN  
23-Aug-2018 16:00:00, NaN  
23-Aug-2018 17:00:00, NaN  
23-Aug-2018 18:00:00, NaN  
23-Aug-2018 19:00:00, NaN  
23-Aug-2018 20:00:00, NaN  
23-Aug-2018 21:00:00, NaN  
23-Aug-2018 22:00:00, NaN  
23-Aug-2018 23:00:00, NaN  
24-Aug-2018, NaN  
24-Aug-2018 01:00:00, NaN  
24-Aug-2018 02:00:00, NaN  
24-Aug-2018 03:00:00, NaN  
24-Aug-2018 04:00:00, NaN  
24-Aug-2018 05:00:00, NaN  
24-Aug-2018 06:00:00, NaN  
24-Aug-2018 07:00:00, NaN  
24-Aug-2018 08:00:00, NaN  
24-Aug-2018 09:00:00, NaN  
24-Aug-2018 10:00:00, NaN  
24-Aug-2018 11:00:00, NaN  
24-Aug-2018 12:00:00, NaN  
24-Aug-2018 13:00:00, NaN  
24-Aug-2018 14:00:00, NaN  
24-Aug-2018 15:00:00, NaN  
24-Aug-2018 16:00:00, NaN  
24-Aug-2018 17:00:00, NaN  
24-Aug-2018 18:00:00, NaN  
24-Aug-2018 19:00:00, NaN  
24-Aug-2018 20:00:00, NaN  
24-Aug-2018 21:00:00, NaN  
24-Aug-2018 22:00:00, NaN  
24-Aug-2018 23:00:00, NaN  
25-Aug-2018, NaN  
25-Aug-2018 01:00:00, NaN  
25-Aug-2018 02:00:00, NaN  
25-Aug-2018 03:00:00, NaN  
25-Aug-2018 04:00:00, NaN  
25-Aug-2018 05:00:00, NaN  
25-Aug-2018 06:00:00, NaN  
25-Aug-2018 07:00:00, NaN  
25-Aug-2018 08:00:00, NaN  
25-Aug-2018 09:00:00, NaN  
25-Aug-2018 10:00:00, NaN  
25-Aug-2018 11:00:00, NaN  
25-Aug-2018 12:00:00, NaN  
25-Aug-2018 13:00:00, NaN  
25-Aug-2018 14:00:00, NaN  
25-Aug-2018 15:00:00, NaN  
25-Aug-2018 16:00:00, NaN  
25-Aug-2018 17:00:00, NaN  
25-Aug-2018 18:00:00, NaN  
25-Aug-2018 19:00:00, NaN  
25-Aug-2018 20:00:00, NaN  
25-Aug-2018 21:00:00, NaN  
25-Aug-2018 22:00:00, NaN  
25-Aug-2018 23:00:00, NaN  
26-Aug-2018, NaN  
26-Aug-2018 01:00:00, NaN  
26-Aug-2018 02:00:00, NaN  
26-Aug-2018 03:00:00, NaN

|              |           |     |
|--------------|-----------|-----|
| 26-Aug-2018  | 04:00:00, | NaN |
| 26-Aug-2018  | 05:00:00, | NaN |
| 26-Aug-2018  | 06:00:00, | NaN |
| 26-Aug-2018  | 07:00:00, | NaN |
| 26-Aug-2018  | 08:00:00, | NaN |
| 26-Aug-2018  | 09:00:00, | NaN |
| 26-Aug-2018  | 10:00:00, | NaN |
| 26-Aug-2018  | 11:00:00, | NaN |
| 26-Aug-2018  | 12:00:00, | NaN |
| 26-Aug-2018  | 13:00:00, | NaN |
| 26-Aug-2018  | 14:00:00, | NaN |
| 26-Aug-2018  | 15:00:00, | NaN |
| 26-Aug-2018  | 16:00:00, | NaN |
| 26-Aug-2018  | 17:00:00, | NaN |
| 26-Aug-2018  | 18:00:00, | NaN |
| 26-Aug-2018  | 19:00:00, | NaN |
| 26-Aug-2018  | 20:00:00, | NaN |
| 26-Aug-2018  | 21:00:00, | NaN |
| 26-Aug-2018  | 22:00:00, | NaN |
| 26-Aug-2018  | 23:00:00, | NaN |
| 27-Aug-2018, | NaN       |     |
| 27-Aug-2018  | 01:00:00, | NaN |
| 27-Aug-2018  | 02:00:00, | NaN |
| 27-Aug-2018  | 03:00:00, | NaN |
| 27-Aug-2018  | 04:00:00, | NaN |
| 27-Aug-2018  | 05:00:00, | NaN |
| 27-Aug-2018  | 06:00:00, | NaN |
| 27-Aug-2018  | 07:00:00, | NaN |
| 27-Aug-2018  | 08:00:00, | NaN |
| 27-Aug-2018  | 09:00:00, | NaN |
| 27-Aug-2018  | 10:00:00, | NaN |
| 27-Aug-2018  | 11:00:00, | NaN |
| 27-Aug-2018  | 12:00:00, | NaN |
| 27-Aug-2018  | 13:00:00, | NaN |
| 27-Aug-2018  | 14:00:00, | NaN |
| 27-Aug-2018  | 15:00:00, | NaN |
| 27-Aug-2018  | 16:00:00, | NaN |
| 27-Aug-2018  | 17:00:00, | NaN |
| 27-Aug-2018  | 18:00:00, | NaN |
| 27-Aug-2018  | 19:00:00, | NaN |
| 27-Aug-2018  | 20:00:00, | NaN |
| 27-Aug-2018  | 21:00:00, | NaN |
| 27-Aug-2018  | 22:00:00, | NaN |
| 27-Aug-2018  | 23:00:00, | NaN |
| 28-Aug-2018, | NaN       |     |
| 28-Aug-2018  | 01:00:00, | NaN |
| 28-Aug-2018  | 02:00:00, | NaN |
| 28-Aug-2018  | 03:00:00, | NaN |
| 28-Aug-2018  | 04:00:00, | NaN |
| 28-Aug-2018  | 05:00:00, | NaN |
| 28-Aug-2018  | 06:00:00, | NaN |
| 28-Aug-2018  | 07:00:00, | NaN |
| 28-Aug-2018  | 08:00:00, | NaN |
| 28-Aug-2018  | 09:00:00, | NaN |
| 28-Aug-2018  | 10:00:00, | NaN |
| 28-Aug-2018  | 11:00:00, | NaN |
| 28-Aug-2018  | 12:00:00, | NaN |
| 28-Aug-2018  | 13:00:00, | NaN |
| 28-Aug-2018  | 14:00:00, | NaN |
| 28-Aug-2018  | 15:00:00, | NaN |
| 28-Aug-2018  | 16:00:00, | NaN |
| 28-Aug-2018  | 17:00:00, | NaN |
| 28-Aug-2018  | 18:00:00, | NaN |
| 28-Aug-2018  | 19:00:00, | NaN |

|              |           |     |
|--------------|-----------|-----|
| 28-Aug-2018  | 20:00:00, | NaN |
| 28-Aug-2018  | 21:00:00, | NaN |
| 28-Aug-2018  | 22:00:00, | NaN |
| 28-Aug-2018  | 23:00:00, | NaN |
| 29-Aug-2018, |           | NaN |
| 29-Aug-2018  | 01:00:00, | NaN |
| 29-Aug-2018  | 02:00:00, | NaN |
| 29-Aug-2018  | 03:00:00, | NaN |
| 29-Aug-2018  | 04:00:00, | NaN |
| 29-Aug-2018  | 05:00:00, | NaN |
| 29-Aug-2018  | 06:00:00, | NaN |
| 29-Aug-2018  | 07:00:00, | NaN |
| 29-Aug-2018  | 08:00:00, | NaN |
| 29-Aug-2018  | 09:00:00, | NaN |
| 29-Aug-2018  | 10:00:00, | NaN |
| 29-Aug-2018  | 11:00:00, | NaN |
| 29-Aug-2018  | 12:00:00, | NaN |
| 29-Aug-2018  | 13:00:00, | NaN |
| 29-Aug-2018  | 14:00:00, | NaN |
| 29-Aug-2018  | 15:00:00, | NaN |
| 29-Aug-2018  | 16:00:00, | NaN |
| 29-Aug-2018  | 17:00:00, | NaN |
| 29-Aug-2018  | 18:00:00, | NaN |
| 29-Aug-2018  | 19:00:00, | NaN |
| 29-Aug-2018  | 20:00:00, | NaN |
| 29-Aug-2018  | 21:00:00, | NaN |
| 29-Aug-2018  | 22:00:00, | NaN |
| 29-Aug-2018  | 23:00:00, | NaN |
| 30-Aug-2018, |           | NaN |
| 30-Aug-2018  | 01:00:00, | NaN |
| 30-Aug-2018  | 02:00:00, | NaN |
| 30-Aug-2018  | 03:00:00, | NaN |
| 30-Aug-2018  | 04:00:00, | NaN |
| 30-Aug-2018  | 05:00:00, | NaN |
| 30-Aug-2018  | 06:00:00, | NaN |
| 30-Aug-2018  | 07:00:00, | NaN |
| 30-Aug-2018  | 08:00:00, | NaN |
| 30-Aug-2018  | 09:00:00, | NaN |
| 30-Aug-2018  | 10:00:00, | NaN |
| 30-Aug-2018  | 11:00:00, | NaN |
| 30-Aug-2018  | 12:00:00, | NaN |
| 30-Aug-2018  | 13:00:00, | NaN |
| 30-Aug-2018  | 14:00:00, | NaN |
| 30-Aug-2018  | 15:00:00, | NaN |
| 30-Aug-2018  | 16:00:00, | NaN |
| 30-Aug-2018  | 17:00:00, | NaN |
| 30-Aug-2018  | 18:00:00, | NaN |
| 30-Aug-2018  | 19:00:00, | NaN |
| 30-Aug-2018  | 20:00:00, | NaN |
| 30-Aug-2018  | 21:00:00, | NaN |
| 30-Aug-2018  | 22:00:00, | NaN |
| 30-Aug-2018  | 23:00:00, | NaN |
| 31-Aug-2018, |           | NaN |
| 31-Aug-2018  | 01:00:00, | NaN |
| 31-Aug-2018  | 02:00:00, | NaN |
| 31-Aug-2018  | 03:00:00, | NaN |
| 31-Aug-2018  | 04:00:00, | NaN |
| 31-Aug-2018  | 05:00:00, | NaN |
| 31-Aug-2018  | 06:00:00, | NaN |
| 31-Aug-2018  | 07:00:00, | NaN |
| 31-Aug-2018  | 08:00:00, | NaN |
| 31-Aug-2018  | 09:00:00, | NaN |
| 31-Aug-2018  | 10:00:00, | NaN |
| 31-Aug-2018  | 11:00:00, | NaN |

31-Aug-2018 12:00:00, NaN  
31-Aug-2018 13:00:00, NaN  
31-Aug-2018 14:00:00, NaN  
31-Aug-2018 15:00:00, NaN  
31-Aug-2018 16:00:00, NaN  
31-Aug-2018 17:00:00, NaN  
31-Aug-2018 18:00:00, NaN  
31-Aug-2018 19:00:00, NaN  
31-Aug-2018 20:00:00, NaN  
31-Aug-2018 21:00:00, NaN  
31-Aug-2018 22:00:00, NaN  
31-Aug-2018 23:00:00, NaN  
01-Sep-2018, NaN  
01-Sep-2018 01:00:00, NaN  
01-Sep-2018 02:00:00, NaN  
01-Sep-2018 03:00:00, NaN  
01-Sep-2018 04:00:00, NaN  
01-Sep-2018 05:00:00, NaN  
01-Sep-2018 06:00:00, NaN  
01-Sep-2018 07:00:00, NaN  
01-Sep-2018 08:00:00, NaN  
01-Sep-2018 09:00:00, NaN  
01-Sep-2018 10:00:00, NaN  
01-Sep-2018 11:00:00, NaN  
01-Sep-2018 12:00:00, NaN  
01-Sep-2018 13:00:00, NaN  
01-Sep-2018 14:00:00, NaN  
01-Sep-2018 15:00:00, NaN  
01-Sep-2018 16:00:00, NaN  
01-Sep-2018 17:00:00, NaN  
01-Sep-2018 18:00:00, NaN  
01-Sep-2018 19:00:00, NaN  
01-Sep-2018 20:00:00, NaN  
01-Sep-2018 21:00:00, NaN  
01-Sep-2018 22:00:00, NaN  
01-Sep-2018 23:00:00, NaN  
02-Sep-2018, NaN  
02-Sep-2018 01:00:00, NaN  
02-Sep-2018 02:00:00, NaN  
02-Sep-2018 03:00:00, NaN  
02-Sep-2018 04:00:00, NaN  
02-Sep-2018 05:00:00, NaN  
02-Sep-2018 06:00:00, NaN  
02-Sep-2018 07:00:00, NaN  
02-Sep-2018 08:00:00, NaN  
02-Sep-2018 09:00:00, NaN  
02-Sep-2018 10:00:00, NaN  
02-Sep-2018 11:00:00, NaN  
02-Sep-2018 12:00:00, NaN  
02-Sep-2018 13:00:00, NaN  
02-Sep-2018 14:00:00, NaN  
02-Sep-2018 15:00:00, NaN  
02-Sep-2018 16:00:00, NaN  
02-Sep-2018 17:00:00, NaN  
02-Sep-2018 18:00:00, NaN  
02-Sep-2018 19:00:00, NaN  
02-Sep-2018 20:00:00, NaN  
02-Sep-2018 21:00:00, NaN  
02-Sep-2018 22:00:00, NaN  
02-Sep-2018 23:00:00, NaN  
03-Sep-2018, NaN  
03-Sep-2018 01:00:00, NaN  
03-Sep-2018 02:00:00, NaN  
03-Sep-2018 03:00:00, NaN

03-Sep-2018 04:00:00, NaN  
03-Sep-2018 05:00:00, NaN  
03-Sep-2018 06:00:00, NaN  
03-Sep-2018 07:00:00, NaN  
03-Sep-2018 08:00:00, NaN  
03-Sep-2018 09:00:00, NaN  
03-Sep-2018 10:00:00, NaN  
03-Sep-2018 11:00:00, NaN  
03-Sep-2018 12:00:00, NaN  
03-Sep-2018 13:00:00, NaN  
03-Sep-2018 14:00:00, NaN  
03-Sep-2018 15:00:00, NaN  
03-Sep-2018 16:00:00, NaN  
03-Sep-2018 17:00:00, NaN  
03-Sep-2018 18:00:00, NaN  
03-Sep-2018 19:00:00, NaN  
03-Sep-2018 20:00:00, NaN  
03-Sep-2018 21:00:00, NaN  
03-Sep-2018 22:00:00, NaN  
03-Sep-2018 23:00:00, NaN  
04-Sep-2018, NaN  
04-Sep-2018 01:00:00, NaN  
04-Sep-2018 02:00:00, NaN  
04-Sep-2018 03:00:00, NaN  
04-Sep-2018 04:00:00, NaN  
04-Sep-2018 05:00:00, NaN  
04-Sep-2018 06:00:00, NaN  
04-Sep-2018 07:00:00, NaN  
04-Sep-2018 08:00:00, NaN  
04-Sep-2018 09:00:00, NaN  
04-Sep-2018 10:00:00, NaN  
04-Sep-2018 11:00:00, NaN  
04-Sep-2018 12:00:00, NaN  
04-Sep-2018 13:00:00, NaN  
04-Sep-2018 14:00:00, NaN  
04-Sep-2018 15:00:00, NaN  
04-Sep-2018 16:00:00, NaN  
04-Sep-2018 17:00:00, NaN  
04-Sep-2018 18:00:00, NaN  
04-Sep-2018 19:00:00, NaN  
04-Sep-2018 20:00:00, NaN  
04-Sep-2018 21:00:00, NaN  
04-Sep-2018 22:00:00, NaN  
04-Sep-2018 23:00:00, NaN  
05-Sep-2018, NaN  
05-Sep-2018 01:00:00, NaN  
05-Sep-2018 02:00:00, NaN  
05-Sep-2018 03:00:00, NaN  
05-Sep-2018 04:00:00, NaN  
05-Sep-2018 05:00:00, NaN  
05-Sep-2018 06:00:00, NaN  
05-Sep-2018 07:00:00, NaN  
05-Sep-2018 08:00:00, NaN  
05-Sep-2018 09:00:00, NaN  
05-Sep-2018 10:00:00, NaN  
05-Sep-2018 11:00:00, NaN  
05-Sep-2018 12:00:00, NaN  
05-Sep-2018 13:00:00, NaN  
05-Sep-2018 14:00:00, NaN  
05-Sep-2018 15:00:00, NaN  
05-Sep-2018 16:00:00, NaN  
05-Sep-2018 17:00:00, NaN  
05-Sep-2018 18:00:00, NaN  
05-Sep-2018 19:00:00, NaN

05-Sep-2018 20:00:00, NaN  
05-Sep-2018 21:00:00, NaN  
05-Sep-2018 22:00:00, NaN  
05-Sep-2018 23:00:00, NaN  
06-Sep-2018, NaN  
06-Sep-2018 01:00:00, NaN  
06-Sep-2018 02:00:00, NaN  
06-Sep-2018 03:00:00, NaN  
06-Sep-2018 04:00:00, NaN  
06-Sep-2018 05:00:00, NaN  
06-Sep-2018 06:00:00, NaN  
06-Sep-2018 07:00:00, NaN  
06-Sep-2018 08:00:00, NaN  
06-Sep-2018 09:00:00, NaN  
06-Sep-2018 10:00:00, NaN  
06-Sep-2018 11:00:00, NaN  
06-Sep-2018 12:00:00, NaN  
06-Sep-2018 13:00:00, NaN  
06-Sep-2018 14:00:00, NaN  
06-Sep-2018 15:00:00, NaN  
06-Sep-2018 16:00:00, NaN  
06-Sep-2018 17:00:00, NaN  
06-Sep-2018 18:00:00, NaN  
06-Sep-2018 19:00:00, NaN  
06-Sep-2018 20:00:00, NaN  
06-Sep-2018 21:00:00, NaN  
06-Sep-2018 22:00:00, NaN  
06-Sep-2018 23:00:00, NaN  
07-Sep-2018, NaN  
07-Sep-2018 01:00:00, NaN  
07-Sep-2018 02:00:00, NaN  
07-Sep-2018 03:00:00, NaN  
07-Sep-2018 04:00:00, NaN  
07-Sep-2018 05:00:00, NaN  
07-Sep-2018 06:00:00, NaN  
07-Sep-2018 07:00:00, NaN  
07-Sep-2018 08:00:00, NaN  
07-Sep-2018 09:00:00, NaN  
07-Sep-2018 10:00:00, NaN  
07-Sep-2018 11:00:00, NaN  
07-Sep-2018 12:00:00, NaN  
07-Sep-2018 13:00:00, NaN  
07-Sep-2018 14:00:00, NaN  
07-Sep-2018 15:00:00, NaN  
07-Sep-2018 16:00:00, NaN  
07-Sep-2018 17:00:00, NaN  
07-Sep-2018 18:00:00, NaN  
07-Sep-2018 19:00:00, NaN  
07-Sep-2018 20:00:00, NaN  
07-Sep-2018 21:00:00, NaN  
07-Sep-2018 22:00:00, NaN  
07-Sep-2018 23:00:00, NaN  
08-Sep-2018, NaN  
08-Sep-2018 01:00:00, NaN  
08-Sep-2018 02:00:00, NaN  
08-Sep-2018 03:00:00, NaN  
08-Sep-2018 04:00:00, NaN  
08-Sep-2018 05:00:00, NaN  
08-Sep-2018 06:00:00, NaN  
08-Sep-2018 07:00:00, NaN  
08-Sep-2018 08:00:00, NaN  
08-Sep-2018 09:00:00, NaN  
08-Sep-2018 10:00:00, NaN  
08-Sep-2018 11:00:00, NaN



08-Sep-2018 12:00:00, NaN  
08-Sep-2018 13:00:00, NaN  
08-Sep-2018 14:00:00, NaN  
08-Sep-2018 15:00:00, NaN  
08-Sep-2018 16:00:00, NaN  
08-Sep-2018 17:00:00, NaN  
08-Sep-2018 18:00:00, NaN  
08-Sep-2018 19:00:00, NaN  
08-Sep-2018 20:00:00, NaN  
08-Sep-2018 21:00:00, NaN  
08-Sep-2018 22:00:00, NaN  
08-Sep-2018 23:00:00, NaN  
09-Sep-2018, NaN  
09-Sep-2018 01:00:00, NaN  
09-Sep-2018 02:00:00, NaN  
09-Sep-2018 03:00:00, NaN  
09-Sep-2018 04:00:00, NaN  
09-Sep-2018 05:00:00, NaN  
09-Sep-2018 06:00:00, NaN  
09-Sep-2018 07:00:00, NaN  
09-Sep-2018 08:00:00, NaN  
09-Sep-2018 09:00:00, NaN  
09-Sep-2018 10:00:00, NaN  
09-Sep-2018 11:00:00, NaN  
09-Sep-2018 12:00:00, NaN  
09-Sep-2018 13:00:00, NaN  
09-Sep-2018 14:00:00, NaN  
09-Sep-2018 15:00:00, NaN  
09-Sep-2018 16:00:00, NaN  
09-Sep-2018 17:00:00, NaN  
09-Sep-2018 18:00:00, NaN  
09-Sep-2018 19:00:00, NaN  
09-Sep-2018 20:00:00, NaN  
09-Sep-2018 21:00:00, NaN  
09-Sep-2018 22:00:00, NaN  
09-Sep-2018 23:00:00, NaN  
10-Sep-2018, NaN  
10-Sep-2018 01:00:00, NaN  
10-Sep-2018 02:00:00, NaN  
10-Sep-2018 03:00:00, NaN  
10-Sep-2018 04:00:00, NaN  
10-Sep-2018 05:00:00, NaN  
10-Sep-2018 06:00:00, NaN  
10-Sep-2018 07:00:00, NaN  
10-Sep-2018 08:00:00, NaN  
10-Sep-2018 09:00:00, NaN  
10-Sep-2018 10:00:00, NaN  
10-Sep-2018 11:00:00, NaN  
10-Sep-2018 12:00:00, NaN  
10-Sep-2018 13:00:00, NaN  
10-Sep-2018 14:00:00, NaN  
10-Sep-2018 15:00:00, NaN  
10-Sep-2018 16:00:00, NaN  
10-Sep-2018 17:00:00, NaN  
10-Sep-2018 18:00:00, NaN  
10-Sep-2018 19:00:00, NaN  
10-Sep-2018 20:00:00, NaN  
10-Sep-2018 21:00:00, NaN  
10-Sep-2018 22:00:00, NaN  
10-Sep-2018 23:00:00, NaN  
11-Sep-2018, NaN  
11-Sep-2018 01:00:00, NaN  
11-Sep-2018 02:00:00, NaN  
11-Sep-2018 03:00:00, NaN

11-Sep-2018 04:00:00, NaN  
11-Sep-2018 05:00:00, NaN  
11-Sep-2018 06:00:00, NaN  
11-Sep-2018 07:00:00, NaN  
11-Sep-2018 08:00:00, NaN  
11-Sep-2018 09:00:00, NaN  
11-Sep-2018 10:00:00, NaN  
11-Sep-2018 11:00:00, NaN  
11-Sep-2018 12:00:00, NaN  
11-Sep-2018 13:00:00, NaN  
11-Sep-2018 14:00:00, NaN  
11-Sep-2018 15:00:00, NaN  
11-Sep-2018 16:00:00, NaN  
11-Sep-2018 17:00:00, NaN  
11-Sep-2018 18:00:00, NaN  
11-Sep-2018 19:00:00, NaN  
11-Sep-2018 20:00:00, NaN  
11-Sep-2018 21:00:00, NaN  
11-Sep-2018 22:00:00, NaN  
11-Sep-2018 23:00:00, NaN  
12-Sep-2018, NaN  
12-Sep-2018 01:00:00, NaN  
12-Sep-2018 02:00:00, NaN  
12-Sep-2018 03:00:00, NaN  
12-Sep-2018 04:00:00, NaN  
12-Sep-2018 05:00:00, NaN  
12-Sep-2018 06:00:00, NaN  
12-Sep-2018 07:00:00, NaN  
12-Sep-2018 08:00:00, NaN  
12-Sep-2018 09:00:00, NaN  
12-Sep-2018 10:00:00, NaN  
12-Sep-2018 11:00:00, NaN  
12-Sep-2018 12:00:00, NaN  
12-Sep-2018 13:00:00, NaN  
12-Sep-2018 14:00:00, NaN  
12-Sep-2018 15:00:00, NaN  
12-Sep-2018 16:00:00, NaN  
12-Sep-2018 17:00:00, NaN  
12-Sep-2018 18:00:00, NaN  
12-Sep-2018 19:00:00, NaN  
12-Sep-2018 20:00:00, NaN  
12-Sep-2018 21:00:00, NaN  
12-Sep-2018 22:00:00, NaN  
12-Sep-2018 23:00:00, NaN  
13-Sep-2018, NaN  
13-Sep-2018 01:00:00, NaN  
13-Sep-2018 02:00:00, NaN  
13-Sep-2018 03:00:00, NaN  
13-Sep-2018 04:00:00, NaN  
13-Sep-2018 05:00:00, NaN  
13-Sep-2018 06:00:00, NaN  
13-Sep-2018 07:00:00, NaN  
13-Sep-2018 08:00:00, NaN  
13-Sep-2018 09:00:00, NaN  
13-Sep-2018 10:00:00, NaN  
13-Sep-2018 11:00:00, NaN  
13-Sep-2018 12:00:00, NaN  
13-Sep-2018 13:00:00, NaN  
13-Sep-2018 14:00:00, NaN  
13-Sep-2018 15:00:00, NaN  
13-Sep-2018 16:00:00, NaN  
13-Sep-2018 17:00:00, NaN  
13-Sep-2018 18:00:00, NaN  
13-Sep-2018 19:00:00, NaN

13-Sep-2018 20:00:00, NaN  
13-Sep-2018 21:00:00, NaN  
13-Sep-2018 22:00:00, NaN  
13-Sep-2018 23:00:00, NaN  
14-Sep-2018, NaN  
14-Sep-2018 01:00:00, NaN  
14-Sep-2018 02:00:00, NaN  
14-Sep-2018 03:00:00, NaN  
14-Sep-2018 04:00:00, NaN  
14-Sep-2018 05:00:00, NaN  
14-Sep-2018 06:00:00, NaN  
14-Sep-2018 07:00:00, NaN  
14-Sep-2018 08:00:00, NaN  
14-Sep-2018 09:00:00, NaN  
14-Sep-2018 10:00:00, NaN  
14-Sep-2018 11:00:00, NaN  
14-Sep-2018 12:00:00, NaN  
14-Sep-2018 13:00:00, NaN  
14-Sep-2018 14:00:00, NaN  
14-Sep-2018 15:00:00, NaN  
14-Sep-2018 16:00:00, NaN  
14-Sep-2018 17:00:00, NaN  
14-Sep-2018 18:00:00, NaN  
14-Sep-2018 19:00:00, NaN  
14-Sep-2018 20:00:00, NaN  
14-Sep-2018 21:00:00, NaN  
14-Sep-2018 22:00:00, NaN  
14-Sep-2018 23:00:00, NaN  
15-Sep-2018, NaN  
15-Sep-2018 01:00:00, NaN  
15-Sep-2018 02:00:00, NaN  
15-Sep-2018 03:00:00, NaN  
15-Sep-2018 04:00:00, NaN  
15-Sep-2018 05:00:00, NaN  
15-Sep-2018 06:00:00, NaN  
15-Sep-2018 07:00:00, NaN  
15-Sep-2018 08:00:00, NaN  
15-Sep-2018 09:00:00, NaN  
15-Sep-2018 10:00:00, NaN  
15-Sep-2018 11:00:00, NaN  
15-Sep-2018 12:00:00, NaN  
15-Sep-2018 13:00:00, NaN  
15-Sep-2018 14:00:00, NaN  
15-Sep-2018 15:00:00, NaN  
15-Sep-2018 16:00:00, NaN  
15-Sep-2018 17:00:00, NaN  
15-Sep-2018 18:00:00, NaN  
15-Sep-2018 19:00:00, NaN  
15-Sep-2018 20:00:00, NaN  
15-Sep-2018 21:00:00, NaN  
15-Sep-2018 22:00:00, NaN  
15-Sep-2018 23:00:00, NaN  
16-Sep-2018, NaN  
16-Sep-2018 01:00:00, NaN  
16-Sep-2018 02:00:00, NaN  
16-Sep-2018 03:00:00, NaN  
16-Sep-2018 04:00:00, NaN  
16-Sep-2018 05:00:00, NaN  
16-Sep-2018 06:00:00, NaN  
16-Sep-2018 07:00:00, NaN  
16-Sep-2018 08:00:00, NaN  
16-Sep-2018 09:00:00, NaN  
16-Sep-2018 10:00:00, NaN  
16-Sep-2018 11:00:00, NaN

16-Sep-2018 12:00:00, NaN  
16-Sep-2018 13:00:00, NaN  
16-Sep-2018 14:00:00, NaN  
16-Sep-2018 15:00:00, NaN  
16-Sep-2018 16:00:00, NaN  
16-Sep-2018 17:00:00, NaN  
16-Sep-2018 18:00:00, NaN  
16-Sep-2018 19:00:00, NaN  
16-Sep-2018 20:00:00, NaN  
16-Sep-2018 21:00:00, NaN  
16-Sep-2018 22:00:00, NaN  
16-Sep-2018 23:00:00, NaN  
17-Sep-2018, NaN  
17-Sep-2018 01:00:00, NaN  
17-Sep-2018 02:00:00, NaN  
17-Sep-2018 03:00:00, NaN  
17-Sep-2018 04:00:00, NaN  
17-Sep-2018 05:00:00, NaN  
17-Sep-2018 06:00:00, NaN  
17-Sep-2018 07:00:00, NaN  
17-Sep-2018 08:00:00, NaN  
17-Sep-2018 09:00:00, NaN  
17-Sep-2018 10:00:00, NaN  
17-Sep-2018 11:00:00, NaN  
17-Sep-2018 12:00:00, NaN  
17-Sep-2018 13:00:00, NaN  
17-Sep-2018 14:00:00, NaN  
17-Sep-2018 15:00:00, NaN  
17-Sep-2018 16:00:00, NaN  
17-Sep-2018 17:00:00, NaN  
17-Sep-2018 18:00:00, NaN  
17-Sep-2018 19:00:00, NaN  
17-Sep-2018 20:00:00, NaN  
17-Sep-2018 21:00:00, NaN  
17-Sep-2018 22:00:00, NaN  
17-Sep-2018 23:00:00, NaN  
18-Sep-2018, NaN  
18-Sep-2018 01:00:00, NaN  
18-Sep-2018 02:00:00, NaN  
18-Sep-2018 03:00:00, NaN  
18-Sep-2018 04:00:00, NaN  
18-Sep-2018 05:00:00, NaN  
18-Sep-2018 06:00:00, NaN  
18-Sep-2018 07:00:00, NaN  
18-Sep-2018 08:00:00, NaN  
18-Sep-2018 09:00:00, NaN  
18-Sep-2018 10:00:00, NaN  
18-Sep-2018 11:00:00, NaN  
18-Sep-2018 12:00:00, NaN  
18-Sep-2018 13:00:00, NaN  
18-Sep-2018 14:00:00, NaN  
18-Sep-2018 15:00:00, NaN  
18-Sep-2018 16:00:00, NaN  
18-Sep-2018 17:00:00, NaN  
18-Sep-2018 18:00:00, NaN  
18-Sep-2018 19:00:00, NaN  
18-Sep-2018 20:00:00, NaN  
18-Sep-2018 21:00:00, NaN  
18-Sep-2018 22:00:00, NaN  
18-Sep-2018 23:00:00, NaN  
19-Sep-2018, NaN  
19-Sep-2018 01:00:00, NaN  
19-Sep-2018 02:00:00, NaN  
19-Sep-2018 03:00:00, NaN

19-Sep-2018 04:00:00, NaN  
19-Sep-2018 05:00:00, NaN  
19-Sep-2018 06:00:00, NaN  
19-Sep-2018 07:00:00, NaN  
19-Sep-2018 08:00:00, NaN  
19-Sep-2018 09:00:00, NaN  
19-Sep-2018 10:00:00, NaN  
19-Sep-2018 11:00:00, NaN  
19-Sep-2018 12:00:00, NaN  
19-Sep-2018 13:00:00, NaN  
19-Sep-2018 14:00:00, NaN  
19-Sep-2018 15:00:00, NaN  
19-Sep-2018 16:00:00, NaN  
19-Sep-2018 17:00:00, NaN  
19-Sep-2018 18:00:00, NaN  
19-Sep-2018 19:00:00, NaN  
19-Sep-2018 20:00:00, NaN  
19-Sep-2018 21:00:00, NaN  
19-Sep-2018 22:00:00, NaN  
19-Sep-2018 23:00:00, NaN  
20-Sep-2018, NaN  
20-Sep-2018 01:00:00, NaN  
20-Sep-2018 02:00:00, NaN  
20-Sep-2018 03:00:00, NaN  
20-Sep-2018 04:00:00, NaN  
20-Sep-2018 05:00:00, NaN  
20-Sep-2018 06:00:00, NaN  
20-Sep-2018 07:00:00, NaN  
20-Sep-2018 08:00:00, NaN  
20-Sep-2018 09:00:00, NaN  
20-Sep-2018 10:00:00, NaN  
20-Sep-2018 11:00:00, NaN  
20-Sep-2018 12:00:00, NaN  
20-Sep-2018 13:00:00, NaN  
20-Sep-2018 14:00:00, NaN  
20-Sep-2018 15:00:00, NaN  
20-Sep-2018 16:00:00, NaN  
20-Sep-2018 17:00:00, NaN  
20-Sep-2018 18:00:00, NaN  
20-Sep-2018 19:00:00, NaN  
20-Sep-2018 20:00:00, NaN  
20-Sep-2018 21:00:00, NaN  
20-Sep-2018 22:00:00, NaN  
20-Sep-2018 23:00:00, NaN  
21-Sep-2018, NaN  
21-Sep-2018 01:00:00, NaN  
21-Sep-2018 02:00:00, NaN  
21-Sep-2018 03:00:00, NaN  
21-Sep-2018 04:00:00, NaN  
21-Sep-2018 05:00:00, NaN  
21-Sep-2018 06:00:00, NaN  
21-Sep-2018 07:00:00, NaN  
21-Sep-2018 08:00:00, NaN  
21-Sep-2018 09:00:00, NaN  
21-Sep-2018 10:00:00, NaN  
21-Sep-2018 11:00:00, NaN  
21-Sep-2018 12:00:00, NaN  
21-Sep-2018 13:00:00, NaN  
21-Sep-2018 14:00:00, NaN  
21-Sep-2018 15:00:00, NaN  
21-Sep-2018 16:00:00, NaN  
21-Sep-2018 17:00:00, NaN  
21-Sep-2018 18:00:00, NaN  
21-Sep-2018 19:00:00, NaN

21-Sep-2018 20:00:00, NaN  
21-Sep-2018 21:00:00, NaN  
21-Sep-2018 22:00:00, NaN  
21-Sep-2018 23:00:00, NaN  
22-Sep-2018, NaN  
22-Sep-2018 01:00:00, NaN  
22-Sep-2018 02:00:00, NaN  
22-Sep-2018 03:00:00, NaN  
22-Sep-2018 04:00:00, NaN  
22-Sep-2018 05:00:00, NaN  
22-Sep-2018 06:00:00, NaN  
22-Sep-2018 07:00:00, NaN  
22-Sep-2018 08:00:00, NaN  
22-Sep-2018 09:00:00, NaN  
22-Sep-2018 10:00:00, NaN  
22-Sep-2018 11:00:00, NaN  
22-Sep-2018 12:00:00, NaN  
22-Sep-2018 13:00:00, NaN  
22-Sep-2018 14:00:00, NaN  
22-Sep-2018 15:00:00, NaN  
22-Sep-2018 16:00:00, NaN  
22-Sep-2018 17:00:00, NaN  
22-Sep-2018 18:00:00, NaN  
22-Sep-2018 19:00:00, NaN  
22-Sep-2018 20:00:00, NaN  
22-Sep-2018 21:00:00, NaN  
22-Sep-2018 22:00:00, NaN  
22-Sep-2018 23:00:00, NaN  
23-Sep-2018, NaN  
23-Sep-2018 01:00:00, NaN  
23-Sep-2018 02:00:00, NaN  
23-Sep-2018 03:00:00, NaN  
23-Sep-2018 04:00:00, NaN  
23-Sep-2018 05:00:00, NaN  
23-Sep-2018 06:00:00, NaN  
23-Sep-2018 07:00:00, NaN  
23-Sep-2018 08:00:00, NaN  
23-Sep-2018 09:00:00, NaN  
23-Sep-2018 10:00:00, NaN  
23-Sep-2018 11:00:00, NaN  
23-Sep-2018 12:00:00, NaN  
23-Sep-2018 13:00:00, NaN  
23-Sep-2018 14:00:00, NaN  
23-Sep-2018 15:00:00, NaN  
23-Sep-2018 16:00:00, NaN  
23-Sep-2018 17:00:00, NaN  
23-Sep-2018 18:00:00, NaN  
23-Sep-2018 19:00:00, NaN  
23-Sep-2018 20:00:00, NaN  
23-Sep-2018 21:00:00, NaN  
23-Sep-2018 22:00:00, NaN  
23-Sep-2018 23:00:00, NaN  
24-Sep-2018, NaN  
24-Sep-2018 01:00:00, NaN  
24-Sep-2018 02:00:00, NaN  
24-Sep-2018 03:00:00, NaN  
24-Sep-2018 04:00:00, NaN  
24-Sep-2018 05:00:00, NaN  
24-Sep-2018 06:00:00, NaN  
24-Sep-2018 07:00:00, NaN  
24-Sep-2018 08:00:00, NaN  
24-Sep-2018 09:00:00, NaN  
24-Sep-2018 10:00:00, NaN  
24-Sep-2018 11:00:00, NaN

24-Sep-2018 12:00:00, NaN  
24-Sep-2018 13:00:00, NaN  
24-Sep-2018 14:00:00, NaN  
24-Sep-2018 15:00:00, NaN  
24-Sep-2018 16:00:00, NaN  
24-Sep-2018 17:00:00, NaN  
24-Sep-2018 18:00:00, NaN  
24-Sep-2018 19:00:00, NaN  
24-Sep-2018 20:00:00, NaN  
24-Sep-2018 21:00:00, NaN  
24-Sep-2018 22:00:00, NaN  
24-Sep-2018 23:00:00, NaN  
25-Sep-2018, NaN  
25-Sep-2018 01:00:00, NaN  
25-Sep-2018 02:00:00, NaN  
25-Sep-2018 03:00:00, NaN  
25-Sep-2018 04:00:00, NaN  
25-Sep-2018 05:00:00, NaN  
25-Sep-2018 06:00:00, NaN  
25-Sep-2018 07:00:00, NaN  
25-Sep-2018 08:00:00, NaN  
25-Sep-2018 09:00:00, NaN  
25-Sep-2018 10:00:00, NaN  
25-Sep-2018 11:00:00, NaN  
25-Sep-2018 12:00:00, NaN  
25-Sep-2018 13:00:00, NaN  
25-Sep-2018 14:00:00, NaN  
25-Sep-2018 15:00:00, NaN  
25-Sep-2018 16:00:00, NaN  
25-Sep-2018 17:00:00, NaN  
25-Sep-2018 18:00:00, NaN  
25-Sep-2018 19:00:00, NaN  
25-Sep-2018 20:00:00, NaN  
25-Sep-2018 21:00:00, NaN  
25-Sep-2018 22:00:00, NaN  
25-Sep-2018 23:00:00, NaN  
26-Sep-2018, NaN  
26-Sep-2018 01:00:00, NaN  
26-Sep-2018 02:00:00, NaN  
26-Sep-2018 03:00:00, NaN  
26-Sep-2018 04:00:00, NaN  
26-Sep-2018 05:00:00, NaN  
26-Sep-2018 06:00:00, NaN  
26-Sep-2018 07:00:00, NaN  
26-Sep-2018 08:00:00, NaN  
26-Sep-2018 09:00:00, NaN  
26-Sep-2018 10:00:00, NaN  
26-Sep-2018 11:00:00, NaN  
26-Sep-2018 12:00:00, NaN  
26-Sep-2018 13:00:00, NaN  
26-Sep-2018 14:00:00, NaN  
26-Sep-2018 15:00:00, NaN  
26-Sep-2018 16:00:00, NaN  
26-Sep-2018 17:00:00, NaN  
26-Sep-2018 18:00:00, NaN  
26-Sep-2018 19:00:00, NaN  
26-Sep-2018 20:00:00, NaN  
26-Sep-2018 21:00:00, NaN  
26-Sep-2018 22:00:00, NaN  
26-Sep-2018 23:00:00, NaN  
27-Sep-2018, NaN  
27-Sep-2018 01:00:00, NaN  
27-Sep-2018 02:00:00, NaN  
27-Sep-2018 03:00:00, NaN

27-Sep-2018 04:00:00, NaN  
27-Sep-2018 05:00:00, NaN  
27-Sep-2018 06:00:00, NaN  
27-Sep-2018 07:00:00, NaN  
27-Sep-2018 08:00:00, NaN  
27-Sep-2018 09:00:00, NaN  
27-Sep-2018 10:00:00, NaN  
27-Sep-2018 11:00:00, NaN  
27-Sep-2018 12:00:00, NaN  
27-Sep-2018 13:00:00, NaN  
27-Sep-2018 14:00:00, NaN  
27-Sep-2018 15:00:00, NaN  
27-Sep-2018 16:00:00, NaN  
27-Sep-2018 17:00:00, NaN  
27-Sep-2018 18:00:00, NaN  
27-Sep-2018 19:00:00, NaN  
27-Sep-2018 20:00:00, NaN  
27-Sep-2018 21:00:00, NaN  
27-Sep-2018 22:00:00, NaN  
27-Sep-2018 23:00:00, NaN  
28-Sep-2018, NaN  
28-Sep-2018 01:00:00, NaN  
28-Sep-2018 02:00:00, NaN  
28-Sep-2018 03:00:00, NaN  
28-Sep-2018 04:00:00, NaN  
28-Sep-2018 05:00:00, NaN  
28-Sep-2018 06:00:00, NaN  
28-Sep-2018 07:00:00, NaN  
28-Sep-2018 08:00:00, NaN  
28-Sep-2018 09:00:00, NaN  
28-Sep-2018 10:00:00, NaN  
28-Sep-2018 11:00:00, NaN  
28-Sep-2018 12:00:00, NaN  
28-Sep-2018 13:00:00, NaN  
28-Sep-2018 14:00:00, NaN  
28-Sep-2018 15:00:00, NaN  
28-Sep-2018 16:00:00, NaN  
28-Sep-2018 17:00:00, NaN  
28-Sep-2018 18:00:00, NaN  
28-Sep-2018 19:00:00, NaN  
28-Sep-2018 20:00:00, NaN  
28-Sep-2018 21:00:00, NaN  
28-Sep-2018 22:00:00, NaN  
28-Sep-2018 23:00:00, NaN  
29-Sep-2018, NaN  
29-Sep-2018 01:00:00, NaN  
29-Sep-2018 02:00:00, NaN  
29-Sep-2018 03:00:00, NaN  
29-Sep-2018 04:00:00, NaN  
29-Sep-2018 05:00:00, NaN  
29-Sep-2018 06:00:00, NaN  
29-Sep-2018 07:00:00, NaN  
29-Sep-2018 08:00:00, NaN  
29-Sep-2018 09:00:00, NaN  
29-Sep-2018 10:00:00, NaN  
29-Sep-2018 11:00:00, NaN  
29-Sep-2018 12:00:00, NaN  
29-Sep-2018 13:00:00, NaN  
29-Sep-2018 14:00:00, NaN  
29-Sep-2018 15:00:00, NaN  
29-Sep-2018 16:00:00, NaN  
29-Sep-2018 17:00:00, NaN  
29-Sep-2018 18:00:00, NaN  
29-Sep-2018 19:00:00, NaN



29-Sep-2018 20:00:00, NaN  
29-Sep-2018 21:00:00, NaN  
29-Sep-2018 22:00:00, NaN  
29-Sep-2018 23:00:00, NaN  
30-Sep-2018, NaN  
30-Sep-2018 01:00:00, NaN  
30-Sep-2018 02:00:00, NaN  
30-Sep-2018 03:00:00, NaN  
30-Sep-2018 04:00:00, NaN  
30-Sep-2018 05:00:00, NaN  
30-Sep-2018 06:00:00, NaN  
30-Sep-2018 07:00:00, NaN  
30-Sep-2018 08:00:00, NaN  
30-Sep-2018 09:00:00, NaN  
30-Sep-2018 10:00:00, NaN  
30-Sep-2018 11:00:00, NaN  
30-Sep-2018 12:00:00, NaN  
30-Sep-2018 13:00:00, NaN  
30-Sep-2018 14:00:00, NaN  
30-Sep-2018 15:00:00, NaN  
30-Sep-2018 16:00:00, NaN  
30-Sep-2018 17:00:00, NaN  
30-Sep-2018 18:00:00, NaN  
30-Sep-2018 19:00:00, NaN  
30-Sep-2018 20:00:00, NaN  
30-Sep-2018 21:00:00, NaN  
30-Sep-2018 22:00:00, NaN  
30-Sep-2018 23:00:00, NaN  
01-Oct-2018, NaN  
01-Oct-2018 01:00:00, NaN  
01-Oct-2018 02:00:00, NaN  
01-Oct-2018 03:00:00, NaN  
01-Oct-2018 04:00:00, NaN  
01-Oct-2018 05:00:00, NaN  
01-Oct-2018 06:00:00, NaN  
01-Oct-2018 07:00:00, NaN  
01-Oct-2018 08:00:00, NaN  
01-Oct-2018 09:00:00, NaN  
01-Oct-2018 10:00:00, NaN  
01-Oct-2018 11:00:00, NaN  
01-Oct-2018 12:00:00, NaN  
01-Oct-2018 13:00:00, NaN  
01-Oct-2018 14:00:00, NaN  
01-Oct-2018 15:00:00, NaN  
01-Oct-2018 16:00:00, NaN  
01-Oct-2018 17:00:00, NaN  
01-Oct-2018 18:00:00, NaN  
01-Oct-2018 19:00:00, NaN  
01-Oct-2018 20:00:00, NaN  
01-Oct-2018 21:00:00, NaN  
01-Oct-2018 22:00:00, NaN  
01-Oct-2018 23:00:00, NaN  
02-Oct-2018, NaN  
02-Oct-2018 01:00:00, NaN  
02-Oct-2018 02:00:00, NaN  
02-Oct-2018 03:00:00, NaN  
02-Oct-2018 04:00:00, NaN  
02-Oct-2018 05:00:00, NaN  
02-Oct-2018 06:00:00, NaN  
02-Oct-2018 07:00:00, NaN  
02-Oct-2018 08:00:00, NaN  
02-Oct-2018 09:00:00, NaN  
02-Oct-2018 10:00:00, NaN  
02-Oct-2018 11:00:00, NaN

02-Oct-2018 12:00:00, NaN  
02-Oct-2018 13:00:00, NaN  
02-Oct-2018 14:00:00, NaN  
02-Oct-2018 15:00:00, NaN  
02-Oct-2018 16:00:00, NaN  
02-Oct-2018 17:00:00, NaN  
02-Oct-2018 18:00:00, NaN  
02-Oct-2018 19:00:00, NaN  
02-Oct-2018 20:00:00, NaN  
02-Oct-2018 21:00:00, NaN  
02-Oct-2018 22:00:00, NaN  
02-Oct-2018 23:00:00, NaN  
03-Oct-2018, NaN  
03-Oct-2018 01:00:00, NaN  
03-Oct-2018 02:00:00, NaN  
03-Oct-2018 03:00:00, NaN  
03-Oct-2018 04:00:00, NaN  
03-Oct-2018 05:00:00, NaN  
03-Oct-2018 06:00:00, NaN  
03-Oct-2018 07:00:00, NaN  
03-Oct-2018 08:00:00, NaN  
03-Oct-2018 09:00:00, NaN  
03-Oct-2018 10:00:00, NaN  
03-Oct-2018 11:00:00, NaN  
03-Oct-2018 12:00:00, NaN  
03-Oct-2018 13:00:00, NaN  
03-Oct-2018 14:00:00, NaN  
03-Oct-2018 15:00:00, NaN  
03-Oct-2018 16:00:00, NaN  
03-Oct-2018 17:00:00, NaN  
03-Oct-2018 18:00:00, NaN  
03-Oct-2018 19:00:00, NaN  
03-Oct-2018 20:00:00, NaN  
03-Oct-2018 21:00:00, NaN  
03-Oct-2018 22:00:00, NaN  
03-Oct-2018 23:00:00, NaN  
04-Oct-2018, NaN  
04-Oct-2018 01:00:00, NaN  
04-Oct-2018 02:00:00, NaN  
04-Oct-2018 03:00:00, NaN  
04-Oct-2018 04:00:00, NaN  
04-Oct-2018 05:00:00, NaN  
04-Oct-2018 06:00:00, NaN  
04-Oct-2018 07:00:00, NaN  
04-Oct-2018 08:00:00, NaN  
04-Oct-2018 09:00:00, NaN  
04-Oct-2018 10:00:00, NaN  
04-Oct-2018 11:00:00, NaN  
04-Oct-2018 12:00:00, NaN  
04-Oct-2018 13:00:00, NaN  
04-Oct-2018 14:00:00, NaN  
04-Oct-2018 15:00:00, NaN  
04-Oct-2018 16:00:00, NaN  
04-Oct-2018 17:00:00, NaN  
04-Oct-2018 18:00:00, NaN  
04-Oct-2018 19:00:00, NaN  
04-Oct-2018 20:00:00, NaN  
04-Oct-2018 21:00:00, NaN  
04-Oct-2018 22:00:00, NaN  
04-Oct-2018 23:00:00, NaN  
05-Oct-2018, NaN  
05-Oct-2018 01:00:00, NaN  
05-Oct-2018 02:00:00, NaN  
05-Oct-2018 03:00:00, NaN

05-Oct-2018 04:00:00, NaN  
05-Oct-2018 05:00:00, NaN  
05-Oct-2018 06:00:00, NaN  
05-Oct-2018 07:00:00, NaN  
05-Oct-2018 08:00:00, NaN  
05-Oct-2018 09:00:00, NaN  
05-Oct-2018 10:00:00, NaN  
05-Oct-2018 11:00:00, NaN  
05-Oct-2018 12:00:00, NaN  
05-Oct-2018 13:00:00, NaN  
05-Oct-2018 14:00:00, NaN  
05-Oct-2018 15:00:00, NaN  
05-Oct-2018 16:00:00, NaN  
05-Oct-2018 17:00:00, NaN  
05-Oct-2018 18:00:00, NaN  
05-Oct-2018 19:00:00, NaN  
05-Oct-2018 20:00:00, NaN  
05-Oct-2018 21:00:00, NaN  
05-Oct-2018 22:00:00, NaN  
05-Oct-2018 23:00:00, NaN  
06-Oct-2018, NaN  
06-Oct-2018 01:00:00, NaN  
06-Oct-2018 02:00:00, NaN  
06-Oct-2018 03:00:00, NaN  
06-Oct-2018 04:00:00, NaN  
06-Oct-2018 05:00:00, NaN  
06-Oct-2018 06:00:00, NaN  
06-Oct-2018 07:00:00, NaN  
06-Oct-2018 08:00:00, NaN  
06-Oct-2018 09:00:00, NaN  
06-Oct-2018 10:00:00, NaN  
06-Oct-2018 11:00:00, NaN  
06-Oct-2018 12:00:00, NaN  
06-Oct-2018 13:00:00, NaN  
06-Oct-2018 14:00:00, NaN  
06-Oct-2018 15:00:00, NaN  
06-Oct-2018 16:00:00, NaN  
06-Oct-2018 17:00:00, NaN  
06-Oct-2018 18:00:00, NaN  
06-Oct-2018 19:00:00, NaN  
06-Oct-2018 20:00:00, NaN  
06-Oct-2018 21:00:00, NaN  
06-Oct-2018 22:00:00, NaN  
06-Oct-2018 23:00:00, NaN  
07-Oct-2018, NaN  
07-Oct-2018 01:00:00, NaN  
07-Oct-2018 02:00:00, NaN  
07-Oct-2018 03:00:00, NaN  
07-Oct-2018 04:00:00, NaN  
07-Oct-2018 05:00:00, NaN  
07-Oct-2018 06:00:00, NaN  
07-Oct-2018 07:00:00, NaN  
07-Oct-2018 08:00:00, NaN  
07-Oct-2018 09:00:00, NaN  
07-Oct-2018 10:00:00, NaN  
07-Oct-2018 11:00:00, NaN  
07-Oct-2018 12:00:00, NaN  
07-Oct-2018 13:00:00, NaN  
07-Oct-2018 14:00:00, NaN  
07-Oct-2018 15:00:00, NaN  
07-Oct-2018 16:00:00, NaN  
07-Oct-2018 17:00:00, NaN  
07-Oct-2018 18:00:00, NaN  
07-Oct-2018 19:00:00, NaN

07-Oct-2018 20:00:00, NaN  
07-Oct-2018 21:00:00, NaN  
07-Oct-2018 22:00:00, NaN  
07-Oct-2018 23:00:00, NaN  
08-Oct-2018, NaN  
08-Oct-2018 01:00:00, NaN  
08-Oct-2018 02:00:00, NaN  
08-Oct-2018 03:00:00, NaN  
08-Oct-2018 04:00:00, NaN  
08-Oct-2018 05:00:00, NaN  
08-Oct-2018 06:00:00, NaN  
08-Oct-2018 07:00:00, NaN  
08-Oct-2018 08:00:00, NaN  
08-Oct-2018 09:00:00, NaN  
08-Oct-2018 10:00:00, NaN  
08-Oct-2018 11:00:00, NaN  
08-Oct-2018 12:00:00, NaN  
08-Oct-2018 13:00:00, NaN  
08-Oct-2018 14:00:00, NaN  
08-Oct-2018 15:00:00, NaN  
08-Oct-2018 16:00:00, NaN  
08-Oct-2018 17:00:00, NaN  
08-Oct-2018 18:00:00, NaN  
08-Oct-2018 19:00:00, NaN  
08-Oct-2018 20:00:00, NaN  
08-Oct-2018 21:00:00, NaN  
08-Oct-2018 22:00:00, NaN  
08-Oct-2018 23:00:00, NaN  
09-Oct-2018, NaN  
09-Oct-2018 01:00:00, NaN  
09-Oct-2018 02:00:00, NaN  
09-Oct-2018 03:00:00, NaN  
09-Oct-2018 04:00:00, NaN  
09-Oct-2018 05:00:00, NaN  
09-Oct-2018 06:00:00, NaN  
09-Oct-2018 07:00:00, NaN  
09-Oct-2018 08:00:00, NaN  
09-Oct-2018 09:00:00, NaN  
09-Oct-2018 10:00:00, NaN  
09-Oct-2018 11:00:00, NaN  
09-Oct-2018 12:00:00, NaN  
09-Oct-2018 13:00:00, NaN  
09-Oct-2018 14:00:00, NaN  
09-Oct-2018 15:00:00, NaN  
09-Oct-2018 16:00:00, NaN  
09-Oct-2018 17:00:00, NaN  
09-Oct-2018 18:00:00, NaN  
09-Oct-2018 19:00:00, NaN  
09-Oct-2018 20:00:00, NaN  
09-Oct-2018 21:00:00, NaN  
09-Oct-2018 22:00:00, NaN  
09-Oct-2018 23:00:00, NaN  
10-Oct-2018, NaN  
10-Oct-2018 01:00:00, NaN  
10-Oct-2018 02:00:00, NaN  
10-Oct-2018 03:00:00, NaN  
10-Oct-2018 04:00:00, NaN  
10-Oct-2018 05:00:00, NaN  
10-Oct-2018 06:00:00, NaN  
10-Oct-2018 07:00:00, NaN  
10-Oct-2018 08:00:00, NaN  
10-Oct-2018 09:00:00, NaN  
10-Oct-2018 10:00:00, NaN  
10-Oct-2018 11:00:00, NaN

10-Oct-2018 12:00:00, NaN  
10-Oct-2018 13:00:00, NaN  
10-Oct-2018 14:00:00, NaN  
10-Oct-2018 15:00:00, NaN  
10-Oct-2018 16:00:00, NaN  
10-Oct-2018 17:00:00, NaN  
10-Oct-2018 18:00:00, NaN  
10-Oct-2018 19:00:00, NaN  
10-Oct-2018 20:00:00, NaN  
10-Oct-2018 21:00:00, NaN  
10-Oct-2018 22:00:00, NaN  
10-Oct-2018 23:00:00, NaN  
11-Oct-2018, NaN  
11-Oct-2018 01:00:00, NaN  
11-Oct-2018 02:00:00, NaN  
11-Oct-2018 03:00:00, NaN  
11-Oct-2018 04:00:00, NaN  
11-Oct-2018 05:00:00, NaN  
11-Oct-2018 06:00:00, NaN  
11-Oct-2018 07:00:00, NaN  
11-Oct-2018 08:00:00, NaN  
11-Oct-2018 09:00:00, NaN  
11-Oct-2018 10:00:00, NaN  
11-Oct-2018 11:00:00, NaN  
11-Oct-2018 12:00:00, NaN  
11-Oct-2018 13:00:00, NaN  
11-Oct-2018 14:00:00, NaN  
11-Oct-2018 15:00:00, NaN  
11-Oct-2018 16:00:00, NaN  
11-Oct-2018 17:00:00, NaN  
11-Oct-2018 18:00:00, NaN  
11-Oct-2018 19:00:00, NaN  
11-Oct-2018 20:00:00, NaN  
11-Oct-2018 21:00:00, NaN  
11-Oct-2018 22:00:00, NaN  
11-Oct-2018 23:00:00, NaN  
12-Oct-2018, NaN  
12-Oct-2018 01:00:00, NaN  
12-Oct-2018 02:00:00, NaN  
12-Oct-2018 03:00:00, NaN  
12-Oct-2018 04:00:00, NaN  
12-Oct-2018 05:00:00, NaN  
12-Oct-2018 06:00:00, NaN  
12-Oct-2018 07:00:00, NaN  
12-Oct-2018 08:00:00, NaN  
12-Oct-2018 09:00:00, NaN  
12-Oct-2018 10:00:00, NaN  
12-Oct-2018 11:00:00, NaN  
12-Oct-2018 12:00:00, NaN  
12-Oct-2018 13:00:00, NaN  
12-Oct-2018 14:00:00, NaN  
12-Oct-2018 15:00:00, NaN  
12-Oct-2018 16:00:00, NaN  
12-Oct-2018 17:00:00, NaN  
12-Oct-2018 18:00:00, NaN  
12-Oct-2018 19:00:00, NaN  
12-Oct-2018 20:00:00, NaN  
12-Oct-2018 21:00:00, NaN  
12-Oct-2018 22:00:00, NaN  
12-Oct-2018 23:00:00, NaN  
13-Oct-2018, NaN  
13-Oct-2018 01:00:00, NaN  
13-Oct-2018 02:00:00, NaN  
13-Oct-2018 03:00:00, NaN

13-Oct-2018 04:00:00, NaN  
13-Oct-2018 05:00:00, NaN  
13-Oct-2018 06:00:00, NaN  
13-Oct-2018 07:00:00, NaN  
13-Oct-2018 08:00:00, NaN  
13-Oct-2018 09:00:00, NaN  
13-Oct-2018 10:00:00, NaN  
13-Oct-2018 11:00:00, NaN  
13-Oct-2018 12:00:00, NaN  
13-Oct-2018 13:00:00, NaN  
13-Oct-2018 14:00:00, NaN  
13-Oct-2018 15:00:00, NaN  
13-Oct-2018 16:00:00, NaN  
13-Oct-2018 17:00:00, NaN  
13-Oct-2018 18:00:00, NaN  
13-Oct-2018 19:00:00, NaN  
13-Oct-2018 20:00:00, NaN  
13-Oct-2018 21:00:00, NaN  
13-Oct-2018 22:00:00, NaN  
13-Oct-2018 23:00:00, NaN  
14-Oct-2018, NaN  
14-Oct-2018 01:00:00, NaN  
14-Oct-2018 02:00:00, NaN  
14-Oct-2018 03:00:00, NaN  
14-Oct-2018 04:00:00, NaN  
14-Oct-2018 05:00:00, NaN  
14-Oct-2018 06:00:00, NaN  
14-Oct-2018 07:00:00, NaN  
14-Oct-2018 08:00:00, NaN  
14-Oct-2018 09:00:00, NaN  
14-Oct-2018 10:00:00, NaN  
14-Oct-2018 11:00:00, NaN  
14-Oct-2018 12:00:00, NaN  
14-Oct-2018 13:00:00, NaN  
14-Oct-2018 14:00:00, NaN  
14-Oct-2018 15:00:00, NaN  
14-Oct-2018 16:00:00, NaN  
14-Oct-2018 17:00:00, NaN  
14-Oct-2018 18:00:00, NaN  
14-Oct-2018 19:00:00, NaN  
14-Oct-2018 20:00:00, NaN  
14-Oct-2018 21:00:00, NaN  
14-Oct-2018 22:00:00, NaN  
14-Oct-2018 23:00:00, NaN  
15-Oct-2018, NaN  
15-Oct-2018 01:00:00, NaN  
15-Oct-2018 02:00:00, NaN  
15-Oct-2018 03:00:00, NaN  
15-Oct-2018 04:00:00, NaN  
15-Oct-2018 05:00:00, NaN  
15-Oct-2018 06:00:00, NaN  
15-Oct-2018 07:00:00, NaN  
15-Oct-2018 08:00:00, NaN  
15-Oct-2018 09:00:00, NaN  
15-Oct-2018 10:00:00, NaN  
15-Oct-2018 11:00:00, NaN  
15-Oct-2018 12:00:00, NaN  
15-Oct-2018 13:00:00, NaN  
15-Oct-2018 14:00:00, NaN  
15-Oct-2018 15:00:00, NaN  
15-Oct-2018 16:00:00, NaN  
15-Oct-2018 17:00:00, NaN  
15-Oct-2018 18:00:00, NaN  
15-Oct-2018 19:00:00, NaN

|              |           |     |
|--------------|-----------|-----|
| 15-Oct-2018  | 20:00:00, | NaN |
| 15-Oct-2018  | 21:00:00, | NaN |
| 15-Oct-2018  | 22:00:00, | NaN |
| 15-Oct-2018  | 23:00:00, | NaN |
| 16-Oct-2018, |           | NaN |
| 16-Oct-2018  | 01:00:00, | NaN |
| 16-Oct-2018  | 02:00:00, | NaN |
| 16-Oct-2018  | 03:00:00, | NaN |
| 16-Oct-2018  | 04:00:00, | NaN |
| 16-Oct-2018  | 05:00:00, | NaN |
| 16-Oct-2018  | 06:00:00, | NaN |
| 16-Oct-2018  | 07:00:00, | NaN |
| 16-Oct-2018  | 08:00:00, | NaN |
